# Supplementary material for: Evolutionary Expansion, Gene Structure, and Expression of the Rice Wall-Associated Kinase Gene Family
Source: Oxford University Press journal article supplement (doi:10.1104/pp.105.069005), 2005-11-01
Supplement: plphys_v139_3_1107_s1.zip [file plphys_v139_3_1107_s1.zip]

Supplemental Data 1. Genomic DNA sequences and predicted post-processing sequences/FL-cDNA sequences of the 125 OsWAKs.

>OsWAK1, gi |15408719: c29030-19425 *Oryza sativa* (japonica cultivar-group) genomic DNA, chromosome 1, PAC clone: P0443D08

```

TAGTCAAGAAAAACAAGGCAATGGCAATAGCATTCTCGAGCATTAGACCTTCCCCTCCCTTTCCAGCAT
TCTGCTGCTCTCCAATCCGGCCTCCATTGTGTAGCAGCTAGCTCCACGAGCGGCAAGATGCACCCGACCT
TGTTGTGCTTGCCACTCTTGGCCTCCTTGCTCCTCTGTGCCACCGCGCGCGCGCCGAGTGCAGCGCGG
GACATGCGGCAACCTCACCGTCAGGTACCCATTCTGGCTAGGCGGCCCAACTTCAACCAGTCCAACCAG
TCGTGCGCGTCTGTAGCTCTGGCCTCCTGTGGCCATCCGGCTTTTCAGGTGTGGTGTAAACGGCGGCGTGG
CGTCGTTGAGGGGCTCGAAATCCTCGTCCTCAGCATCGACTACAACAGCAGCTCATTTCGTGCGGCACA
CAAAAGGGTCGCGGACGGCGGCGACGGCGTGTGCCGCACCGACTTCAACATATCGTCCAGCCTAGCCCTC
AGCCCGTTACAGATCAGCAGCAGCAACCGGGCCATCTGCTTCTCTACAGCTGCAACGGCACGGAGCCAC
CGGAGATCGACGGCCTTGTGAACGCCACCATCTCCAGCTGCAGTAAGCCTATCTACGCGTACCTCGGCGG
GATCTACGACCGTGATAATCCACCGGCGATCAAAGCCGGGAAGTGCACGTACTCGTACCTGCCGGTGCTG
TGGCCGGACTCGCCGGCGAACTTGACGGCGGGGACAACTACAGCCCGCAGTTCAAGAAGGGGTTCTGTGT
TGGAGTGGCAGAAGAACGGGTTTCGGCGACTGCGACGCCTGTAAACGGGAGCGGCGGTGAGTCCGGGTACAT
CAACGATTCCGCGGCGGCGTTCGCGTGCCTCTGCTCCGACGGCAAGCTGCGCCGCTCGACATGCCCCGGT
GAGTACCACACTTGCCTATCGCCCAATCTGACGCATGTGTTAGCTAGTTGAAGATTTTGGCTCGGTGTAC
GGTTAACTGGACGGCCAAATTGGCGGTTGCGATCGGTAGCCATGTACTCCGATCCCAAAGTTGCAATCT
CTCGTAGGTCCCAGTGTGGATTTGGAGTTGAATTACTGGCCACGTCAATGTCTTGGATTTTACTCAACC
TCTCGCTCGCTCGCGGTCTCGGGTAGTTACATGGGCGGCTGGCTAGTCAGCTGCAGAGATGGTGGTAAAT
TTTGGGAGGGTTTGCCTCGGTGGTGACGTTGACGACGACTTATCAAGCAGGCTGCAGGCAGGAGTTGACA
TGGGCGGCTAGTCACTGTTTCTCCATTGACCACCCAGCGTGATTGATTCTTGGGTAAACGCATGAATTC
CGTCTTTTCTTTGTCTCTGTCTCCCAACTTCCCAGGGCAGAGATCCTTCTGATCCTTCTGCTTCCCCCT
CTTCTTTTCCCCGAAAATTCACCATTTCTATTAGTGAATGGTTTATTATTAGGACAAATAAGACGTT
AGCAGTAGTTGCCTGAAGCTTCGAGTGTGTTGAGCTGGTCCATAAACTAATGCTCATAGTAGGTGACAAT
GTAAATCATTAGTACATGATCACCAGTGGCATTCTGCGTAGAAGTACCAAAATAGTGGGGACAGATGGG
CACGGGCTAAATTTGGCATCGTGACGGCGCACCGGCTACCAGGGGCTTTCTTTGAACTGATAAGGC
TAACGGGATAAGTTACGCTTTATATCTTTGAAAGCGGTCAATCGGAGTTGTTAGAAGTGGCGGGCCATG
AATTTTGGAGCCGAAAGAAGCGAATATTAAGGAAAGACCTAATATCAAATAATTAGAAGGGTTGATACT
TTGAACCCAGATCGTCTCGTTCCACCATCTTGTGGAGCTAGCCGGAAGACCCTGGACGTTTTCTCAAATTTT
TGGAGCCCAACATATACGCAGACATAATTGGAACACAATGGAAGCTCAACATATAAGACATCATAATG
GTGCGATCTATTGGCTTCTTAACCTTAGTTACTGCTCCCTCCGGTACAAAAATCTTGATGTTTTAACCTT
GTAAATGGTGATTGCGAATTGTTAATGCTTCTATCTTAGCATGTTATATTGGACCGCTTTGCCCTACATG
CTTGGAAGTAAAAACCAAGTAAAAAAGCTAGGGAATTGGACCTTTAGCTCGCACCGATACAGGTGATTAA
TTCAAACCAACGGCAGCAGTGTAGTGATTACCATGAGTACAATACTATATTTAATATGGTAAAAATAGTAA
ATTGATAGTAAATATGGAGTAAATCACTTTCTGGTATGTGAGATCATGTTCAAACATCAATAATTTTGA
AAACTGGAAGGAGTACACACTGCCCTTCTCAACTTTTAAACGCTACTATTTCCAAAAAGAAAACCTTAA
ATGCAATAAACAGATATGAAAACTGTTCCCTCAAAAAATATATGAAAAATTCAAACAGGAAATGCGGT
AGTGCTAGAAATATGAAATTATGAACTTTAATCAGTGTAGTTTGTATTGAAATTTTAAATACAATGGGGAA
TGAAAGCTTATATAAAAAATAAAAAATATATAGAAAAATGCAAAACAATATACTACCTTGGTGCCCCATTA
ACGATAGTACTAGAGATTGCCACCACTAAGCTAATCCGGTCTATGAGTCTATCCAAGTGCTTTTACATA
AAAGAGCATTGTGAGCTTTGCTGATAATGACATAGATTTTCGGCAAAATATGGTACCAAATGCTAATGCCT
TTCTGCAAAGATTCTGATTCTAGGAGTTGATAGATACCTACATAATTTTTAGGCTTACTTTTTTTTCAA
AATTACTTTCAAATTTGTTGAAATGAATTTTGTGCTCTACGCTCCTAAAATATATTTTCTCAAAAAAATA
TTCTATTGTATTGCACACTTGTTTTAAGTTTCAATTTAATAATGTTTAATTTATAACTACAATCAAGTAGA
TAATCTGTACAACAATCCACTTAATAATCCTTAGATTGTGTTTGAAGTATGAAATGAGAAAATTAAGAAG
ATACAACAAACAAGATGAGTCATTAGCTTATATGAATTGAGTATTAAGTGTTTTAAATTTGAACTATAT
GAATTGAGTATTACTTTTATTATATTTATCTATAAACATAGTTAAACATGAGACAGTTTGACTGACCAAAA
ATCAAAACAACCTTATAATCTAAAACGGAGGGAGTACTGGTTAGTGGTAGGAAGTACGACGAGCAGACATA
TGTGTTCAATCTGCATTAGGTTTTTGGTTAGAGAGAAGATACTAGATATTAACACGTTTTTATCAGAAAG
TACTCCTTCTGTCCTATATTATTAGGTTTCAGAAAAATGTATCTACAAGTTCTCATAATATTAGGATATGT
CAAATTAGGTAGGTTTTTATTAACACATGAAGTATTCTGTAGGAGTTTTTTTTTAGTTTTAGTTACATC
CGTACAGGTAAAGCGTTGACCGGTTGAAAGTGGACTAGTCTCTGCTTACCGGCAAGAGTAGGTGTGGAAC
AAAGGCGTAGTAGCTGTTATATAACACAGGTAGAAACAATGGTGGACAGCAGCGTGCCTAGCTAGCTG
GAAGAGGGTTAATAGGAGTACACGACGATGAGTCCGGACAACTGGTCCAGTCACATCAGGGCGGTTATA
ACAGCTAGCTGCCCATAGGGCACCCCGGAACTCGCACGCGTGGACGACGATCGTTTCGTGTATCAGGTCA
AACATTTGACACAGAGGAATAGTTCCCGTGTGCAAGTTTTCTTACTTCCATCTCCCCACAACTTCCA
TCTCCTTCAGAAATCCCCTATCCCCCTCCTCCTCTTCTGTCTCGATGTCCCCGAGCTTCTTCTTTGTGCT
TCGTCTCGGCTGGTGGTACGCTGATGCTCGCGCGGCGGAGGGGAGCCGAGGAGGAAGGAGGAGG
AGGCTGCCTGGGCGAGCAGAAATGCGGCGACCTGAATATCTCCTCTCCGTTCTGGATCATCCAGGGCAG
GCGGATAAGCCGTGTGGTCTCTGGATTACCAGGTATATTGCAACAACCTCCACCGGCGTCGCAACTCTTC
```

OsWAKs-Supplemental Data 1[1].txt

GAAGCTCTACAGACAGCGGGTTTGATATCATCAACATATCATATGGGGACCGTACTATGCTCGTCTTTGA  
TGTCCATAAGCTAGCTCGCCTGAATAACTCCACCGGCTGCAGTATCCCAGTGTTTAAACACCTTCGCCAAG  
CTGCCCATCAGTTTTACAATCAGCCCTTCCAATCACAACTCGTCTTCTACAACCTGCACCGAGGCGCCGC  
CGGCGGAGCAGCAGCAACAACCTGGGGCTCGTGGAGACGAGATGCGGTAACAACACGTTTTGCTCGCCTGGG  
AGGGCGTTTTCCACGGGGAGGGCGACTACGACAAGTACTATTTGGAAGGCTGCAGCAGAAACAGCACCGTC  
TTCTTGCCGGTGCTGGAACCGCTGATGGCAAGGCGAACGCCAGCAGGTATGTGGAGCTCGTGGGTGGAG  
GCTTCCTCATAACATGGGACCTGCCACCGCCAGTGACATCTTCTGGTAAGTTACACCTCCCTGAAACTAT  
TAGGATCAAGTTTCGTATAGAAAATCCACTGTATATCTTGATACTTCCGATCTCCAAGCGAGTACTAGTAG  
AATACGGTTCTCGCTCATCAGCGTGTAGGACAGGGAATCTGTCGATTGGCTGATAGGGTCGTATCTTGC  
CCAATCGTGGCGGCTGGGCAACAGGGATGAGCAAGAATTAAGTGAATTAAGTATCAAAGCAGTGGA  
CCATGACCGTCTTTTCGATTCCATCTCACTCCGGTGCCATTCTTCCAATCTTCGATCCTGTTCTGGTA  
CATGACTGAGAAGACCATGCACATCTGTTGGAATTGGAACCGATACGGCAAGACGATGAGGCCGTAGACA  
GCCATTATCCAGTCAATTTTTTCGGCCACTACAGAGAATTCCTAAAGTTAAATGTATCGTACTAGAAGAA  
GAAGTAGCAGTATTAATTTCTCATGTCTTCTCAATCTCATCAACAACACATCACCATTATCTCTCT  
TCGTTTTCGATGCCCTCTCTTCTTCTTCTTCTTCTTCTTCTTCTTCTTCTTCTTCTTCTTCTTCTTCTTCT  
ATACGGCGGCGAGACAATCGTCCACAAGAAGGCTGCGCGGCCAGTACTGTATGTGGCAAGGTGACCATCTC  
GTGCGCGTTTCGCCGTCTGCGCGGAGCAGGCAACGGAGAGCAATGCGGCTGGCTTGGATTCCAGGTTATC  
TGCCACAACGACACTCCATACCTCGGCTACTACAAGCCCAGATATCGGATCCAGATCCTCGACATCTTCT  
ACGGCAACAATTCATTGCTCGTCTCTGACATCCACAAGCTCGGTGACTTCATTGTCTTCTCCGGCGTCAG  
CAAAGAATACTCTGCCATGTTCCGAGGACCAACACCTCTCCAAGGTGGCCTCCCGTTCTCCATCAGC  
ACCACCAATCTCAACCTCTTCTGTACAGTTGCAATAAGGCGCTTGTGCCGCGGACGGAGACGACGACC  
TCGTGGAGACGAGGTGCGGCAACAAGACGTTTGTCTCGCGTAGGAGGGAATTACAGTGATTCCGGCGACTA  
CCCGGCGTTTTACATGGAAGGCTGCAATGCTACCGTCTGCGCGGTGCTGGGCACGGACGCGAGGAGCTAT  
GAGCAGCTCATCCGCGACGGCTTCTCTTGTACATGGCAAGAGACGCCGTCTGTTAAGTTCTGTTCCGCG  
AAATTATCCATTTAATCATCACTTTCGGGAGGAGGAAATGCGTAAATTTATGGTGTCAACTTTATCGAA  
TCCGTTAATCAATCAGTGACTTGTATTGTTGTTGATAAGGCAGTCGTATCGCTAATCCATCTCCGACCT  
TTGGATATCGAAATCAGAGAAATATATGCAAAAACATACTCCCTTCGTTTCACGATGTAATCATTTTTA  
GCGTTTCTTACGTTAATATTGATGTTAATTAATCTAGACATATATACCTATCTAGATTTATTAACATCAA  
TATAAACGTGAAAAATACTATAGTGATGAAACGGAGAAAATAGTACGGAGTACTTCGTCAAGAAGCTGTA  
GCAGCAGAGAGAGTAGTAGCAATGTAGCAGTATGTTCAATCCGTAGACTTTGACCGGTCAAAACCGCTTC  
GCCACCGTCTTTTGGCCACGCCTCATATCCCATCCCTCGATCTCTCGTCCCCTTCTTCTCTCTCATAT  
AATCCATTTACCAGTGCATTCCGTAGTTGATTTGCGTACCCAAGTCCACCAGATATGCTCCGCTCATA  
CTGTACTGTGTAGCTTCTTCTCGAGTTGCGGCGACCGGCGAGCTCGTCTAGTCTGGCTGCTTGC  
CCACGCCATGCGGCAAGCTGACCATCTCTACCCGTTCTGGCTGGAGGAGCCCGGCGGCGCGCTGCGG  
GTGCGCGCCCTTCCAGCTCAAGTGCAACGCCACCGGCGCATACCTCACGCACACCATCTACGAGGCGTAT  
CGCGTTGTTGATATCTTACCGGAAACCACACCGTCCATGTGGTGGACGAGAATCTCCCGCTCGCCACCG  
GCTGCCCGGCGCGCGCTTCAACATCTCCGATGGCATCTGGCAGGCGCGCTTGTCTATCAGCGAAGCCAA  
CGCAGAGCTGCGCTTCTCTGTGTAACAAGTCACTTCCGGCGGCGCTGCTCTCCCGGCTTCCATAGC  
CTGCTTGTGTGATGACCAAACTCTCCGTCCGGCTCGTCAGCGACCACTTTACACGAGGATGGGATTC  
CACCGGGCTGTAACCTTACGGTTGTGCCGATCGTTACGCGTACAATGGGAGTATGGCCGGCTATATTGC  
CAGCATGAGGAGTGGGTTTCTACTAGAGTGGGCGGTGGTTTCAGGGGATTGTCCAAATGTCAAGTAAGC  
GGCGGGAATTGCACGTACAGCGACGACCTGGAGTTCGCTGCAATTGCCCGACGGGATGCACCCTGACA  
AGTGATAGAGAGTTCAGAAAATCGGAAGAGCAGGTAATTTGTCCAGTCAATTATCAATTAGAATAAAAA  
TTTTAACATAGTTCTGTGAACATGCAGCTAGGCCATCTCAACCGATTCAATGCATCCAAAGTGTTTCA  
TCTAGTTGATAGTTTTCTTTATATATATAGAAAAGATGACACATCATTTCTGTTATACAGGAAGATTTCC  
ATGCTACTGTGGCCTAATGTCCACTAGATAAACTCTTATTATAATAATGCGCGTGACATCTAGTTTTGCT  
ATCGAGGAAAGAAATTAACACAGCATTGTACAGCAATGTTTATAAGAATATAAAATGCAAAGTGGATA  
TTGATATTTTTGTTTTGAATTATGAGTGTTTGTCTTCAAGTTCCTGCTGTTTTGTTGTTAGTTTCTCATC  
AAACAATTATTTCACTGATGGGAACATTGGCATTGGCAGCTTATGGAATCCTAGTCAAACGTGTTACGT  
GTAGTTTTGAAGTATTCACACTACATCTGATAAAGATATCATACCAATACCATGTTCCAATTTTTCTTC  
TGCTGATTGCTGACTGACGAAGAATCCCTCATCTGATTGACAGCAAATACCCTTTCATTTTCTAATCCT  
TAATTAGTGTTTCCAAACATGTGGAAAGCATAAATTGCATCTGTATTTCTGTTGAATTAGGCTGAAAAG  
TTGTATAAGCACTGTCCTTCGTTTCAACAGGGGGTTAGGGGAGCAATGATACCCTAACAATGTGATTATG  
AATGATCATTCTATTTGTTTATGGCATATTTGTGCAAGGTATTAAGAGTCTGTTCTTCTGCAGGTTCAAG  
AAGCAAGAGTCACATAATAGGAATAGGTGAGTATAATTCATTCTTGTCTTCTGGACTTCCCCAACCATTC  
AAAATGTAATTATGAAGATATGCTTCAGATCTTGGTTCTCAGATATTGATAGTGTCTGTCTGTCTGTTAT  
TGCAGCATGTGGATCAAGCGGCGGAATATTATTGATTGTATCTATATTATTTTTGCTTGGCACAACCGC  
AAGAAGAGGAAACAACCCGAGATTTGAAAGATCTCATGCATAGTTTCTTCAATGCAATCATACAGCA  
AAGACCTTGAGTTGGGTGGTTCTCCCATATATTCACTTACGAGGAACCTGAAGAGGCTACTGCTGGATT  
TAGTGCCTCGAGGGAACCTTGGTGATGGTGGTTTTGGAAGTGTTTACAAAGGTAGGAGAATATGTTTGCAC  
AACTCCCTTGTGTTAATAGATTCTCATCTAATCACTTCTCATTAGCATGCCTAATTGCATGCGCAG  
GGGCTCCGTTGAACCTTTGTTCCATAATAGATAACTTCCCCTATTAACTTAGCAGTTACAATTTCTCTTT  
CTGCCATTACAGAAAGCTCCGGGATGGGAGAGTAGTTGCAGTGAAGCGCCTTTACAAGAACAACCTACAGA

OsWAKs-Supplemental Data 1[1].txt

CGAGTAGAGCAATTCCTAAATGAGGTAGACATTTTGTCCCGCTACTGCACCAGAACCTTGTTATCCTAT  
ATGGCTGCACGTCTCGTTCTAGCCGTGACCTTCTCTTGGTCTATGAGTACATCCCAAATGGGACAGTTGC  
AGACCATCTACATGGACCCCGTGCAGGAGAACGAGGCCTCACATGGCCTGTAAGAATGACAATTGCGATA  
GAAACGGCTGAGGCACTGGCATACCTTCATGCAGTTGAAATCATACACCGTGATGTCAAGACCAACAACA  
TATTGCTGGACAACAACCTTCCATGTCAAAGTTGCGGACTTTGGACTATCGCGCCTGTTCCCGCTTGAAGT  
CACCCATGTATCAACTGTTCCACAGGGGCACACCAGGGTATGTTGACCCAGTGTAACCACAGTGCTACAAG  
CTAACCGATAAGAGTGATGTGTATAGCTTTGGTGTGTGTGTATAGAGCTAATTTCTCAAAACCAGCTG  
TGGACATGTCCAGGAGCCACAGTGACATTAACCTGGCTAACATGGCTCTCAACAGAATTGAGAACCATGA  
AGTTGATCAGTTGGTTGATCCAGAGATCGGCTATGAGACTGACAGTGAAACAAAGAGGATGGTAGATCTG  
GTGGCCGAGCTGGCCTTTAGTGCTTGAGATGGACAGAGAGAGCAGGCCACCAATTAAGGAGGTAGTGG  
AGGTCTGAATTGTATCAAGAACGGGGAATGTCCAGCGGAAAAGATGAACAAGAATGCGTCTCAAAGGA  
AGATTCGCATCTGCTGAAGGACAGCCTACAGTATTCGCTGACTCAGTAATCCATAGATTTTCATAGCCAA  
TCTACTAACCACTCGGTAGCATCAAACCTCTAGCGGATGATGAGAACTTTGTATTGATTCTGATGAAATA  
AGGATAACTAAGTTGTCCCCTCTTGGTTGATGGACTAATTAATACTACAAGTGTGTTGACTATGAGCTTGG  
CAGAAATTCAGACAATTGGTGAATGCGGTAGGAGAAATACAGGGTTCAAACAATCTCGTGTAATCTAGTG  
TTCAGTGTGTTTCATGATTTTCAGGTTAGCGAGTGGTATCAGGGAGAACACATCCCATTGTTACCCTAACTA  
GAGGTTGCAATTTTGC

>OsWAK1, gi |32975488|dbj |AK065470.1| Oryza sativa (japonica cultivar-group) cDNA  
clone: J013020L24, full insert sequence

GAGTCAAGAAAAACAAGGCAATGGCAATAGCATTTTCTCGAGCATTAGACCTTCCCCTCCCTTTCCAGCAT  
TCTGCTGCTCTCCAATCCGGCCTCCATTGTGTAGCAGCTAGCTCCACGAGCGGCAAGATGCACCCGACCT  
TGTTGTGCTTGCCACTCTTGGCCTCCTTGCTCCTCTGTGCCACCGCGCGCGCGCGGAGTGCGAGCCGGC  
GACATGCGGCAACCTCACCGTCAGGTACCCATTCTGGCTAGGCGGCCCAACTTCAACCAGTCCAACCAG  
TCGTCGCCGTGCTCAGCTCTGGCCTCCTGTGGCCATCCGGCTTTCGAGGTGTGGTGTAACGGCGGCGTG  
CGTCGTTGAGGGGCTCGAAATCCTCGTCCTCAGCATCGACTACAACAGCAGCTCATTGTCGCGGCACA  
CAAAAGGGTCGCCGACGGCGGCGACGGCGTGTGCCGACCCGACTTCAACATATCGTCCAGCCTAGCCCTC  
AGCCCGTTTACGATCAGCAGCAGCAACCGGGCCATCTGCTTCTCTACAGCTGCAACGGCACGGAGCCAC  
CGGAGATCGACGGCCTTGTGAACGCCACCATCTCCAGCTGCAGTAAGCCTATCTACGCGTACCTCGGCGG  
GATCTACGACCGTGATAATCCACCGGCGATCAAAGCCGGGAAGTGCACGTAACCTGCGCGGTGCTG  
TGGCCGGACTCGCCGGCGAAGTTGACGGCGGGGACAACTACAGCCCGCAGTTCAAGAAGGGGTTGCTGT  
TGGAGTGGCAGAAGAAGGGTTCCGGCAGTCCGACGCCGTGAACGGGAGCGGCGGTGAGTGCCGGTACAT  
CAACGATTCGCGGGCGGCGTTGCGGTGCTCTGCTCCGACGGCAAGCTGCGCCGCTCGACATGCCCGGT  
TCAAGAAGCAAGAGTCACATAATAGGAATAGCATGTGGATCAAGCGGCGGAATATTATTGATTGTATCTA  
TATTCAATTTTTGCTTGGCACAACGCAAGAAGAGGAAACAAACCCGAGATTTGAAAGATCTCATGCATAG  
TTCATCTTCAATGCAATCATACAGCAAAGACCTTGAGTTGGGTGGTCTCCCCATATATTTCACTTACGAG  
GAAGTTGAAGAGGCTACTGCTGGATTTAGTGCTCGAGGGAACTTGGTGATGGTGGTTTTGGAAGTGT  
ACAAAGGAAAGCTCCGGGATGGGAGAGTAGTTGCGAGTGAAGCGCTTTACAAGAACAACCTACAGACGAGT  
AGAGCAATTCCTAAATGAGGTAGGATGATTTTGTCCGCTACTGCACCAAGAACCTTGTATCTATATGGC  
TGCACGTCTCGTTCTAGCCGTGACCTTCTCTTGGTCTATGAGTACATCCCAAATGGGACAGTTGCAGACC  
ATCTACATGGACCCCGTGCAGGAGAACGAGGCCTCACATGGCCTGTAAGAATGACAATTGCGATAGAAAC  
GGCTGAGGCACTGGCATACTTCATGCAGTTGAAATCATACACCGTGATGTCAAGACCAACAACATATTG  
CTGGACAACAACCTTCCATGTCAAAGTTGCGGACTTTGGACTATCGCGCCTGTTCCCGCTTGAAGTCAACC  
ATGTATCAACTGTTCCACAGGGCACACAGGGTATGTTGACCCAGTGTAACCACAGTGCTACAAGCTAAC  
CGATAAGAGTGATGTGTATAGCTTTGGTGTGTGTGTATAGAGCTAATTTCTCAAAACCAGCTGTGGAC  
ATGTCCAGGAGCCACAGTGACATTAACCTTGGCTAACATGGCTCTCAACAGAATTGAGAACCATGAAGTTG  
ATCAGTTGGTTGATCCAGAGATCGGCTATGAGACTGACAGTGAAACAAAGAGGATGGTAGATCTGGTGGC  
CGAGCTGGCCTTTAGTGCTTGACAGATGGACAGAGAGAGCAGGCCACCAATTAAGGAGGTAGTGGAGGTC  
CTGAATTGTATCAAGAACGGGGAATGTCCAGCGGAAAAGATGAACAAGAATGCGTCTCCAAAGGAAGATT  
CGCATCTGCTGAAGGACAGCCTACAGTATTCGCTGACTCAGTAATCCATAGATTTTCATAGCCAATCTAC  
TAACCACTCGGTAGCATCAAACCTCTAGCGGATGATGAGAACTTTGTATTGATTCTGATGAAATAAGGAT  
AACTAAGTTGTCCCCTCTTGGTTGATGGACTAATTAATACTACAAGTGTGTTGACTATGAGCTTGGCAGAA  
ATTCAGACAATTGGTGAATGCGGTAGGAGAAATACAGGGTTCAAACAATCTCGTGTAATCTAGTGTTGAG  
TGTGTTTCATGATTTTCAGGTTAGCGAGTGGTATCAGGGAGAACACATCCCATTGTTACCCTAACTAGAGGT  
TGCAATTTTGC

>OsWAK2, 2861.t00011, Chromosome 1, pre-processing

ATGCATCCTGCTTTGCTACTGCTCCCCCTCGCTCCTTGCTGCATGCCGCGGCAGCAATT  
GGCCACAACGAGACCAGCACCAGTGGAACACAAGCTGCACGCGGCGGAGATGCGGGAAC  
CTGACCATCAGTTACCCCTTCTCGCTCAGCGGCGTGACGCGGTGTCCTGCGGCTACCCG  
GTGTTGGACCTCACCTGCGACAACCGAACCAGCGCGCGCTTCTCAGCAGGACGTTTCAGG  
GACCATGTTTTGCGTGAGCATGATTTTCTACGAGAATAACTCGTGGTGGCGGCGGTA  
GAGACCACCTTCGCCGGCGACGCCGACTGCCCGTCCCGGATTTCAACGTGACATCCAGC

OsWAKs-Supplemental Data 1[1].txt

CTCAGTCCCTACCCGTTTCATCATCAGCAACACCAACAAGTATCTCGCATTTCATCTATGAC  
TGCTCGATTCTCTGAACACGTTGGGCAGCTGCAACGGCCATGTGGAAACCGGACGATGGGA  
GCTTACATCTCCGACAAGTGGAACAGCACACCACCGTCCGGGGTTCGAGGGAAGTGAAC  
TCTGTGACGCTGCCGGTGCCTGGTACTATGATGGAATGAAGCCGGTGAGTGGACACTAC  
GAGCAATTGATCAAAGATGGGTTCTGCTTGGAAATGGATGAGGTGGTAATGGGAGATCAA  
GACTGCGATGGGTGCAGAAGGAGAGGCGGGGAGTGCAGGTTTGAACAGCTTTTCGTTCCAG  
TGCTTCTGCCCCGACGGGTTGCTCTGCTCCAATTCAACCCGTACCAACACAACGTCGAAGC  
CATCCATCAGGTAAGGAGCGTTTGCTACCTTTGCAAAAAATTTTTTGAAGAAATACTTT  
TGCATTGGCGTGAGAATGAATACATTATGCATATTACACGCATTGAGATACATGTTCTTA  
CTTATCACTTAGGTTGTGCTTTTTGTATGCAACCTTGAGGGAAAAAGTTCGTATAAGAA  
TTCCAAACAAGCTTAGGAACTGCGAGTCTGCAATTTTTGTTGGTCATTATTTCTTAGAG  
CTAAGAGATTGCTGGCTATTCGTTTTTCATAAAGAGTAGAGATAATAGAAATTCAAAGGC  
TGCTAACATTAAGACGCCACCTCTGGTCTGAAACTATGAATGGCACTTCCCCTTGACTAT  
AATATAACAATGCATTTTCATCATTTGAAATGGTCAATTCGTGTATTTGATTTCTTTTAA  
CTTCCTTTTCGTTTTGTTTTGACTGAAACTTCCCTTGAATTGCTTCGGTTTTTCATCTTTGA  
TGGCAAACTGTTTCATTGAACCTCTTTCTTTCTGTTCTCTATAGCACCTACTGCACTGTT  
CAAAACAACGTTAGCAGTGGAAATCAACAAAAAGGCAGAGGGTAGCAGTTAGTCGCTCTA  
TCAAGTTGAGCAGTCAGTTGTGACAGCATATCGTTTTTCATATATGTCTGTGCAACCTTG  
TGTCAACTGCCAAGTACTACTTCAGTTCATCAAAATGTGCGATGTGTCATGTCATCCACA  
TCGGATTGTAGCATATGCATGCATCTATAAGAGTTACATTTGTGATAAATGATGCCTTT  
GATGTTAGGGAATAGAGTAAATTAATCAGCTGAAAGGGGCTGGCACATGAACTAAGACCC  
GGCAAGGAACAAATGAAATCCAGGGGAAAGGTGAAAGGGACTAGGACGACCTAGAAGTCT  
TCTTTGTTTTAAAGAAGAAAATGATGTGTGTTAGTCCTGTAATGTTTCATACTGTTGTTAC  
TGTGAAACTTTATGCTTTCATTAGTTTCGGTTAATCCATATCATAAGATAGATTATGCTAA  
TTATTACCTAACCAATCTTTTGGGCCATCTATAATCATTTTTTTAAACCATTAGATCTA  
TCTGCTCACATGTTTACTTCTTTAGGGGTAACAAAAATTTGTTATAGCTCAAAATAAAA  
TGAAAAGGGTCCATTTTACTCCCTACGGATTATTTTCATTAGTTCACTTAACCCTCTAAAT  
TATTTTTTTGACTCATTTTACACCAATGGCGGAGCTAGGTTCTCAACCCAGTGGGGGTCA  
AAATGCATAAATATATAACAATGTGGGGGGTCAATCTATACAAATTTTCATTGTTTCATG  
TACTTTTCACTATTTTTCATATTATCAATATATATCTTGCAAAATACCTGTGGGGTCAGCT  
GACCCACAGTTTTAACATGGCTCAGCCACTGTTTTACACCCCAAATTATTGAAAACAGA  
TCATCTTGCTCTCTAATGGTATTTCTCTTCTGTTTCTCTCCAAATAAATTGTATTTTG  
CAATGAAATTTGGAAGGACTGATAGATATATCATAACCTATCTCCCAACATTTTTTAGAA  
TTTTCTTTTATCATTGTATACATATATTTAAAGCACTAGGCTTGATTTAAACATCGAGGTT  
TTAAATTTTAAACAGATAGTCATGATTTTTTTTTGAAAGTATTTTTGAACTTTGATAAT  
GGTGTTATCTATGGCTCTATAAAATTTTCAGATTAAGTACAACCTCGTATAAAGAGAAATG  
CTATTAATAGTTTAAAGGGTAAAATGAGTTAAAATAGTTTTGTGGGTAAAGTGAACCAA  
TGAAATAGTTAGGGAGTAAAATAGAGCTTTTTCTACGAATTTTAAAGTACAAAACAAGC  
AAACTCTAATCTAGACGAGCACAAAAAGAAAATATCCAGATAAACTAATACAAAATTATA  
ATTAAAAAAACTAAATGTTGCGATAAAGCTTTACTAAAGTGGCACTATAAATACAAGCTT  
TAAATAGTCAATATTTTTAGTTAGTGATAAGATACACCATCTGGTTACTAATTTGTCATT  
TCTGGTTTCTTCGTATGGGCAAATTTTATGGTCTGTTTGGTTTGATGTCCACTACCAAA  
ACTTTGGCGGGTAGAGTTGAAAAGGTACAAGATAAAGCCAATAATGTCCTATAAGAAACA  
ATTTGTGTGCAACCTCAATTTTTTTTATAAAGTATAAATTTTAGTAGGGTAGCAAACCAA  
GCTATGAGCCCCCTTTATTTGTTCCCTCTCATAATATGCTAATTCCTCCTCTGCGCTCT  
TTACATGCAGGCAAGGTTAATCGAGGAATCAAGATTGCCGCAGGTAATGCTGATTTCAAT  
TAAACATTTACCAAGATAGGCTAGTATGGTAATCCCTCCGTTTCAAATGTTTGACACCG  
TTGACTTTTTAGCACATGTTTGACCGTTTCGTTTTATTCAAAAAATTTGTGAAATATGTAA  
AACTATATGTGTACATGAAAGTATATTTAACAATGAATCAAATGATTTGAAAAGAACAAA  
TAATTACTTAAATTTTTTGAATAAAGCAAAATAGTCAAACACGTACTAAAAAGTCAACGGT  
GTCAAACATTTTGAAGGAGAGGAGTATATGACATCTCCTGATCTGTTCTTGTGATTCAA  
CCACTGTCAACACAGGAACCGCAGCGGCTGTTGTATGTCTCGGTATACTTGGCGTTGGC  
TCCACTGTGTTGTATACCGGAGGAAGAGGAAAAGATCTGCATCCTTTGAAGGTCTCATC  
CATGGAGGGACGCCATTGCCATCACTCACGAAAGAATTCAGCCTCGCCGGCTTGGCATAT  
ACCCACATCTTCACTACGAGGAGCTCGACGAGGCTACCGACGGCTTCAGCGACGCCCCG  
GAGCTCGGCTCGGCGGCTTGGCAGAGTGACAAAGGTACAAGATCATACACAAAGCCA  
GTGTCCCATTGTCCATGTGCGACTTGATCAGTTGAGAGTAAAACATTGACATGTCTTGTT  
ACAGGGATACTCCGAATGGGGACACGGTGGCGGTGAAGCGGCTGTACAAGAACAGCTAC  
AAGAGCGTGAGCAATTCAGAACGAGGTGGGCATCCTGTGCGGGCTGCGCCACCCAAAC  
CTCGTCAAGCTCTTTCGGCTGCACGTGCGAGACCAACAGCCGCGACCTGCTCCTCGTCTAC  
GAGTTCGCTCCCAACGGCAGCTCGCCGACCCTGCACGGCGGCGGCGGCGGCGGCTCG  
TACCTCCCTCGACTCGGCGAGCGGCTCGGCATCGCCGTGAGACGGCCAGCGCGCTGGAG  
TACCTCCACACGGTGGAGCCGAGGTGGTGCACCGCGACGTGAAGACGAACAACATCCTC

OsWAKs-Supplemental Data 1[1].txt

CTCGACGAAGGGTTCCACGTGAAGGTGGCCGACTTCGGCCTCTCCCGGCTGTTCCCGGCG  
GACGCCACGCACGTGTCCACGGCGCCGACGGGCACGCCGGGTACCTCGACCCGATGTAC  
CACCAGTGCTACCAGCTGACGGACAAGAGCGACGTGTACAGCTTCGGCGTGTTGCTCGTC  
GAGCTCATCTCCTCCAAGCCGGCGGTGGACATGAACCGGCGCGGCGGCGACGTCAACCTG  
GCCAACATGGCCGTGCACATGATCCAGAGCTACGAGATGGAGCAGCTGGTGGACCCGCGAG  
CTCGGGTACGCGTCGGACGGCGAGACGAGGAGGACGGTCGATCTCGTCGCCGAGGTGGCG  
TTCCGGTGCTTGACGCCGGAGCAGGACGTGAGGCCGCCGATCGGTGAGGTGTTGGACGCG  
CTGAGAGAAGCTCAGCGGATGGACAAGGTAGGCTACGTCAAGGACGACGCCGGGCTGGTC  
AAGAAGAGCCGAGACGGCTCTCCGGACTGCGTCATGTACCAGTGGATTAGCCCATCCACC  
ACTTCCAATAACAGCAGCTGA

>OsWAK2 gi|32982193|dbj|AK072170.1| Oryza sativa (japonica cultivar-group) cDNA  
clone: J013129P20, full insert sequence

GGTGGTTCGCTCTCTTCATCTCTCCAAAGTCCACTCCACCCTCCGCTTGACAGGATGCAAACAAGAATCT  
GCCGGCAACCTTAACCACCCTCTCCTTCCTTGTGTCTCGTTGATATCTTCTTTCTCTCCTCCGATGCGA  
TGCATCCTGCTTTGCTACTGCTCCCCCTCGCCTCCTTGCTGCATGCCGCGGCAGCAATTGGCCACAACGA  
GACCAGCACCAGTGGCAACACAAGCTGCACGCCGGCGAGATGCCGGAACCTGACCATCAGTTACCCCTTC  
TCGCTCAGCGGCGTGCAGCCGGTGTCTGCGGCTACCCGGTGTGGACCTCACCTGTGACAACCGAACCG  
GCCGCGCGTTCTCAGCAGGACGTTCAAGGACCACCTGTTTCGCGTGACAGTATTTCTACGAGAATAA  
CTCGCTGGTGGCGGCCGTAGAGACCACCTTCGCCGGCGACGCCGACTGCCCGTCCCGGATTTCAACGTG  
ACATCCAGCCTCAGTCCCTACCCGTTTCATCATCAGCAACACCAACAAGTATCTCGATTTCATCTATGACT  
GCTCGATTCTGAACACGTTGGGCAGCTGCAACGGCCATGTGGAACCCGACGATGGGAGCTTACATCTC  
CGACAAGTGAACAGCACACCACCGTCCGGGGTTTCGAGGGAAGTCAACTCTGTCAGCGTGCCGGTGCCT  
GGGTACTATGATGGAATGAAGCCGGTGAGTGGACACTACGAGCAATTGATCAAAGATGGGTTTCGCTCTTGG  
AATGGATGAGGTGGTAATGGGAGATCAAGACTGCGATGGGTGCAGAAGGAGAGGCGGGGAGTGCAGGTT  
CGAACAGCTTTTCGTTCCAGTGCTTCTGCCCGGACGGGTTGCTCTGCTCCAATTCACCCGTACCAACACA  
ACGTCAAGCCATCCATCAGGCAAGGTTAATCGAGGAATCAAGATTGCCGAGGAACCCGACGCGGCTGTTG  
TATGTCTCGGTATACTTGGCGTTGGCTCCACTGTGTTGTATACCCGGAGGAAGAGGAAAAGATCTGCATC  
CTTTGAAGGTCTCATCCATGGAGGGACGCCATTGCCATCACTCACGAAAGAATTACGCTCGCCGGCTTG  
GCATATACCCACATCTTCACCTACGAGGAGCTCGACGAGGCTACCGACGGCTTCAGCGACGCCCGGGAGC  
TCGGCGTCGGCGGCTTCGGCACAGTGTACAAAGGGATACTCCGGAATGGGGACACGGTGGCGGTGAAGCG  
GCTGTACAAGAACAGCTACAAGAGCGTGGAGCAATTCAGAACGAGGTGGGCATCTGTGCGGCTCGCG  
CACCCAAACCTCGTCACGCTCTTCGGCTGCAGTGCAGACCAACAGCCGCGACCTGCTCCTCGTCTACG  
AGTTTCGTCGCCAACCGGCACGCTCGCCGACCACCTGCACGGCGGCGCGGCGGCGGCTCGTCTCCTCGA  
CTGGCCGACGCGGCTCGGCATCGCCGTCGAGACGGCCAGCGCGCTGGAGTACCTCCACACGGTGGAGCCG  
CAGGTGGTGCACCCGCGACGTGAAGACGAACAACATCTCCTCGACGAAGGGTTCACGTGAAGGTGGCCG  
ACTTCGGCCTCTCCCGGCTGTTCCCGGGCGACGCCACGCACGTGTCCACGGCGCCGACGGGCACGCCGGG  
GTACCTCGACCCGATGACCAAGTGTACCAAGTGTACAGTACAGGACAAGAGCGACGTGTACAGCTTCGGCGTG  
GTGCTCGTCGAGCTCATCTCCTCAAGCCGGCGGTGGACATGAACCGGCGCGGCGGCGACGTCAACCTGG  
CCAACATGGCCGTGCACATGATCCAGAGCTACGAGATGGAGCAGCTGGTGGACCCGACGCTCGGGTACGC  
GTCGGACGGCGAGACGAGGAGGACGGTCGATCTCGTCGCCGAGGTGGCGTTCGGTGCTTGACGCCGGAG  
CAGGACGTGAGGCCGCCGATCGGTGAGGTGTTGGACGCGCTGAGAGAAGCTCAGCGGATGGACAAGGTAG  
GCTACGTCAAGGACGACGCCGGGCTGGTCAAGAAGAGCCGAGACGGCTCTCCGGACTGCGTCATGTACCA  
GTGATTAGCCCATCCACCACTTCCAATAACAGCAGCTGAGACTTGACAAGATGTTCAAGAAATACTGGC  
TACTGACTGCAGACACCGTAATATTCAGAGTTGTGTGCTATTGTTTGTGAGAGAAAGAGAGGTTTCCCA  
TGAAAAGAAAAAGACATAGAGGTTTATGTGTCTTTGGCTGTAAGTGAAGTTAAGTTGTTGGCCAGTGTT  
TGGCTACTTTGGCACATTCAAGAAAGCAGTTTGATGATCTGTTAGAGAAGTT

>OsWAK3, 4748.t00012, Chromosome 1, pre-processing

ATGGAGTCATGCGTCTGCGCGTGCAGTGGCCAAGTGCAGCTACCGTGGTGGCACTCTTC  
GCCACCGTTATGAAGAAGGGGTGGCTGAGGCGCCTCATGATGTCGATCCCATGGTGAGA  
CATCAGACCCGAATACCATCTCTAGAGCAGCAGAAAATTGTTAGAAATCTGATGTCTTAG  
AGAGAACAAGTCTAGTGCTATGATAAACGTGGCAGAAGTAACACTTACGAATCAACTGTT  
GCATGCATTCTTAACATTCTTCATTATATGCTACACTAAACATGAACAGTCAGTCATGTT  
ATCCATGTCTGCGAGTTTCAGTTTGGCATTGTCATATAACCTTTCTTTCAGATGCTAGATTA  
ATCAGTTACAAGTAAGTAACCTTACTTGGCCTTGTATGACAGAGGAGGCCACC  
TGTTGCTTTCCAATTTTTCTGCTGGGTACGCATGAATAGCCAAGACAATAATCTTAAAA  
ATTTCTTTCAGACAAATGGGCATGTGGTTTTTCAAAGAGTGGAGAACAAGTGTAGCCTAA  
GATATTTTACGGAAAATGAGATACGGCAAATCACCCGTGGTTATAGCATTTTACTGGGAA  
AAGGTTTCATTCCGTAAAGTCTACAAAGGAATGCTGGATGGTCGATGCCCTGTTGCTGTGA  
AGCGATACATACATGAAGTCCGGAAAGAGGAGTTTGCCAAGGAGGTGATAGTACATTCTC  
AAATAAATCACAAGAATTTGTTGACTTTTGGGCTGCTGCACGGAGGAAAATGCTCTAA  
TGATCGTTATGAGTTTATCTGTAATGGGAACCTGAATGATATCCTTCATTGCAGCAACA

OsWAKs-Supplemental Data 1[1].txt

CAAATGGACGTGTTCTTTCTCTTTGGGCAAACGTTTAGACATTGCCATTGAGGTTGCTG  
AAGTGCTCTGGTGCATGCATTCAATGTATAATCCCGTTCTCCATGGTGACATCAAACCTG  
CTAATATACCTTGTGGATGAAAATCTTTCACCAAAGCTATCTGATTTTGAATAGCAAGAT  
TGCTTTGTGCTAATGGGGCTCAACATACTAACAATATCATTGGATCTATAGGTTATGTTG  
ATCCTGCATTCTGCATGAATGGAATTCTAACCCCAAAGAGTGATGTTTACAGCTTTGGAG  
TGGTTTTGCTGGAAATCATCACCAGAAAAAAGCAGTGGATGGGACCATCACCTTGCTC  
AGCGTTTCACTGAGGCTGTTGAACAAGGGAAGAAGGTGATGCATTTGTTGACGAGGACA  
TCAACAATACAAAAACATGAACCTTCTCGAAGATATTGGCAAGTTAGCAGTTAAATGCT  
TGAGGAGGGAGGTTGAAGTGCCTCTGAAATGGTTGAAGTAGCAACTAGTCTAAGAATGA  
TTAGGAAAGCTCTAGAGGAAGAAGAGGGAAATCTGATTGAGCAGAACATAAGTGCACCAA  
GCAACTCAATTCCTTCAAAGAATGTGAAGTCATCAGCACAGCAATTTGGCAATCTAAAAA  
TCTTTAAACAAGAGGAAATTAAGCTTATGACAAAAAACTACAGCATGAAATTTAGGGAAG  
AGTTCTGTGAACGGCTGTACAATGGAGTCATTGGCACAACACATGCAGTTATAGTAAAGC  
AAGTGAGAACATCTTCAGAAAGTGACAGAATGATGTTTCTGAAGACTATGAGCATACTGT  
CTCAGAAGTATCACAAAAATATTGCCAATGTTGCTGGCTTCCACTTAGGGGATTCCATTT  
CAGAGTGTGTGATGAATCTTGCTGTGATTTATCCCAGGGAAATGACGGCCATGTTTGCT  
TCTGTAACCGAAACCTTTATGACATTATCTGCACCAGGGAAAACTCCCCCTTCATCTAC  
GTTTATCAATAGCCGTCCAGTGTGCAGAGGGCCTGGTTCATATCCATTGTTAGCTG  
AAAATCCTGATTACATTCTACAGGCCTCTTGGGAAACTTCAGGTCGATCAATATTTTTC  
TGGACAAGAATCTCGTCCAAAGTCTTCAATTTCTAATTTATCAACATTTCTTGGGCTTT  
CAGTCATGCAGAAACATACCCGCTCTGTCGATCGTCTAATGACCAAAGATCACAAATAT  
ATTATTTAGATGGAAGGGATATTTCTGGTCAGCTGTTCAATCCCAAGTCTGATGTTTATA  
GCTTTGGAGCTGTTCTTTTGAAGTCTCACTTGAAGACAGTGAGATACATGTCTAGTG  
GAAGAGTTACATGCTTACCAAAGACTTCTTGATACTTATAGAATAGACCATAGTGCAG  
CGATATCTTTTGGCAAGAAGGTTTATGATGAGCAAGGTAAGTGTGTTTATTCACGAGGCAA  
TTGCTATTGGAGTTGAGTGCTTACAACCTGATGTCCAGACGCGGCCAAAAATGAGTGATGT  
TCTTTACGTCTTCGGACCATCTCTGCAGCTCAGAGTATTAGAAGCAAACCTCATCATGGC  
TACACAAACAAAAGGTTGCACCTCTTAGACCAATAAATTTGCACATTTATCACATGGAAC  
ATAGTGCAGTCAAACCTTCTAAGATTTTAAACCACTATTGTATGAAAAAATGCCTTACAAA  
ATACTACCTTTGCAGCCTTTGTAATTTGTAATTCACCTACAAGTTTCTCACACATTGTATT  
GCTAATAGCTACAAAACCATGGTGTGATATGAAAGCAACTTGAAATACAAATCTAATGGT  
ACCAATTTAATATGACTAGGCATATATGTAACCTTGACTAACGGTAAAAACTTACAAATTT  
TGAAGTGTCTACATGGCTTACAAAATCGAACAGATGGGTACCTCCATTATACATTTTGT  
TTTAGTTTTTTTACTTGTACATTATTACTCCCTTTGGTTTCAAATTTACTCAAATTAATA  
TGGACAATGAATTTCTGTCTATAGAAAAACCAATCACATTTAGCGGTGATGTTCTTTAAGAT  
GTATTATTCTCATATCAAATTTTCAGGTATAGCAATACTCATTTTAATCGAAATTATGAT  
AGATGAATTTAAATGTGCACCTTGTTTGCAAAAAATATAAATATTATTGTGCTAAGTACTT  
AAGTAGCACTCCCTTAGCCACAAATACTTGGACGTTTTAGATACGATCCAGTCAAAAT  
TTAAACCTTTGATGTTTTAAAAGTTTTATTTTAAAAACATTAATAATGACATGTGTAGATTT  
GTCTGGTTGTCCAGAAAGGTACTTCCATAATCTCATAAACTTGATTTTTACTACCTCCAT  
TCCTAAAAAAATTCCTTTTTAGCTATGAACCTAGACTGTGTTGTCCATGTTTATAGCTAA  
AAAGGCACCTCTCAGAAAGGGAGGTAGCATAAAATTTATTGTTAAGAGATGCACTTTAAAG  
ACATTAATAAAGGTCAATTTTCAAATGTCAAGTATCTTTTACTGGATGGAGTACAACATA  
CAAAATACGAATTTTGAAGCAGCAATTAATCTATTGGATTTTATTCTTTTGGTT  
TCTCCAATACAGCTAGTGGTGACAACAAACCAACCAACATGTAGCCCTCCCCTTACCA  
AGAAGTTTGTCAAAACTCCACCAACTATTGTATCGATCATTCCCCTGAACATATTGGAGA  
AGATAACTAGCAACTTCAGTAATGATGCCCTAATAGGAGAGGGCCAGACGCCAGAGTTT  
TCTTTGGAGAGCTTAGTGATGGGCAGAAATCTGCAATAAAGAAGCTTGATCCTAATGAAA  
AAATTGTAGTGCAGGTGATGGATGCATGTCTTGCCCTTTCACCTTTGAGTTGATGCTCTT  
TATTCATGATGACTTGAAGCAAGGAATGCCTTCTCAATTCATGTGTCTTGCAGGTTTT  
GACCATTTCAAGAATGTTGAAGCATGACAACATTGTCCAAATTCCTGGATATTTTATTGA  
AGGGGAAAAATCGTGTTCTTGCTTATGAGTATGCACCAAAGGGTTCCTTGCACGATATTCT  
TCATGGTAAGGAATAACAAAAGATTTTTACTTTGACATATTCCTATCTTGCTTGCTTACT  
GTATTATGATCAATAGCTGAAATAATATGATTTTTTTACTACATTACTTTATGTGTTGAA  
TTGCTTGTGTCATTACTCAAGAGGGTGTGAGAGGAGCCAGCCAGGAACACCTCTATCAT  
GGGAGCAGCGAGTGAAGATTGCTCTAAGTGCTGCAAAAGGGCTTGAGTTCTCCACGAGA  
AGGCTGTGCCTCCTGTATCCACACCAACATCAGGTCCAACAACATATTTATCTTTGGCA  
ATGATGTTGCAAAAATAGGTGACCTCGCGCTCTCCAAGCAGCTTTATCCTGAAAGTGATA  
ATGACTACTACAATACCCGACTATATCCTCTGCGCAGTTTTGGCTATGATGCAATTGCAC  
CAGAGTATGCAATGAAAGATTTCCATGCTTGA

>OsWAK3, 4748. t00012, Chromosome 1, post-processing  
ATGGAGTCATGCGTCTGCGCGTGGCCAACTGCGCCTACCGTGGTGGCACTCTTC

OsWAKs-Supplemental Data 1[1].txt

GCCACCGGTTATGAAGAAGGGGTGGCTGAGGCGCCTCATGATGTGCGATCCCATGACAAAT  
GGGCATGTGGTTTTTCAAAGAGTGGAGAACAACCTGTAGCCTAAGATATTTTACGGAAAAT  
GAGATACGGCAAATCACCCGTGGTTATAGCATTCTTACTGGGAAAAGGTTTCATTTCGGTAAA  
GTCTACAAAGGAATGCTGGATGGTGCATGCCCTGTTGCTGTGAAGCGATACATACATGGA  
ACCCGGAAGAGGAGTTTGCCAAGGAGGTGATAGTACATTCTCAAATAAATCACAAGAAT  
GTTGTTTCGACTTTTGGGCTGCTGCACGGAGGAAAATGCTCTAATGATCGTTATGGAGTTT  
ATCTGTAATGGGAACCTGAATGATATCCTTCATTGCAGCAACACAAATGGACGTGTTCCCT  
TTCTCTTTGGGCAAACGTTTAGACATTGCCATTGAGGTTGCTGAAGTGCTCTGGTGCATG  
CATTCAATGTATAATCCCGTTCTCCATGGTGACATCAAACCTGCTAATATACTTGTGGAT  
GAAAATCTTTCACCAAAGCTATCTGATTTTGAATAGCAAGATTGCTTTGTGCTAATGGG  
GCTCAACATACTAACAATATCATTGGATCTATAGGTTATGTTGATCCTGCATTCTGCATG  
AATGGAATTCTAACCCCAAAGAGTGATGTTTACAGCTTTGGAGTGGTTTTGCTGGAAATC  
ATCACCAGAAAAAAGCAGTGGATGGGACCATCACCTTGCTCAGCGTTTCACTGAGGCT  
GTTGAACAAGGGAAGAAGGTGATGCATTTGTTTGACGAGGACATCAACAATACAAAAAC  
ATGAACCTTCTCGAAGATATTGGCAAGTTAGCAGTTAAATGCTTGAGGAGGGAGGTTGAA  
GTGCGTCTGAAATGGTTGAAGTAGCAACTAGTCTAAGAATGATTAGGAAAGCTCTAGAG  
GAAGAAGAGGGAAATCTGATTCAGCAGAACATAAGTGCACCAAGCAACTCAATTCCTTCA  
AAGAATGTGAAGTCATCAGCACAGCAATTTGGCAATCTAAAAATCTTTAAACAAGAGGAA  
ATTAAGCTTATGACAAAAAACTACAGCATGAAATTTAGGGAAGAGTTCTGTGAACGGCTG  
TACAATGGAGTCATTGGCACAACACATGCAGTTATAGTAAAGCAAGTGAGAACATCTTCA  
GAAAGTGACAGAATGATGTTTCTGAAGACTATGAGCATACTGTCTCAGAAGTATCACAAA  
AATATTGCCAATGTTGCTGGCTTCCACTTAGGGGATTCCATTTAGAGTGTGTGTATGAA  
TCTTGCTGTGATTTATCCCAGGGAAATGACGGCCATGTTTGCTTCTGTAACCGAAACCTT  
TATGACATTATCTGCACCAGGGAAAAACTCCCCCTTCATCTACGTTTATCAATAGCCGTC  
CAGTGTGCAGAGGGCCTGGTTTCATATCCATTCAATTGTTAGCTGAAAATCCTGATTCACAT  
TCTACAGGCCTCTTGGGAACTTCAGGTGCATCAATATTTTTCTGGACAAGAATTCGTG  
CCAAAAGTCTTCAATTTCTAATTTATCAACATTTCTTGGGCTTTCAGTCATGCAGAAACAT  
ACCGCCTCTGTGATCGTCCTAATGACCAAAGATCACAAATATATTATTTAGATGGAAGG  
GATATTTCTGGTCAGCTGTTCAATCCCAAGTCTGATGTTTATAGCTTTGGAGCTGTTCTT  
TTGGAATCATCACTTGAAGACAGTGAGATACATGTCTAGTGGAAGAGTTTCACATGCTT  
ACCAAAGACTTCCTTGATACTTATAGAATAGACCATAGTGCAGCGATATCTTTTGGCAAG  
AAGGTTTATGATGAGCAAGCTAGTGGTGACAACAAACCAACCAACATGTAGCCCTCCC  
CTTACCAAGAAGTTTGTCAAAACTCCACCAACTATTGTATCGATCATTCCCCTGAACATA  
TTGGAGAAGATAACTAGCAACTTCAGTAATGATGCCCTAATAGGAGAGGGCCAGACGCC  
AGAGTTTTCTTTGGAGAGCTTAGTGATGGGCAGAAATCTGCAATAAAGAAGCTTGATCCT  
AATGAAAAAATTGTAGTGACAGTTTTGACCATTTCAAGAATGTTGAAGCATGACAACATT  
GTCCAAATTCCTGGATATTTTATTGAAGGGGAAAATCGTGTTCTTGCTTATGAGTATGCA  
CCAAAGGTTTCTTGCACGATATTTCTCATGAGGTGTCAGAGGAGCCAGCCAGGAACA  
CCTATGATGGGAGCAGCGAGTGAAGATTGCTCTAAGTGCTGCAAAAAGGGCTTGAGTTC  
CTCCACGAGAAGGCTGTGCCTCCTGTATCCACCAACATCAGGTCCAACAACATATTT  
ATCTTTGGCAATGATGTTGCAAAAATAGGTGACCTCGGCGTCTCCAAGCAGCTTTATCCT  
GAAAGTGATAATGACTACTACAATACCCGACTATATCCTCTGCGCAGTTTTGGCTATGAT  
GCAATTGCACCAGAGTATGCAATGAAAGATTTCCATGCTTGA

>OsWAK4, (gi |20805138: 99485-101036, 102205-102452, 102553-102682, 102831-103352, 103435-103877) *Oryza sativa* (japonica cultivar-group) genomic DNA, chromosome 1, PAC clone: P0551A11

TCAATGTATAGTCCTGTTCTTCATGGTGATGTGAAACCTGCTAATATACTGTTAGATGAAAACCACTCAC  
CAAAGATATCTGATTTTGAATAGCAAGATTGCTTTGTGCTAATGGGGCTCAACATACCAAAAAATATCAT  
TGTTCTATAGGTTATGTTGATCCTGCATTCTGCGAGAATGGAATTCTAACCCCAAAGAGTGATGTTTAT  
AGCTTTGGAGTGGTTTTGCTGGAGATAATCACCAGAAAGAAAGCAGTGGATGGGACCATCACCTTGCTC  
AAAGTTTCACTGATGCCATTGAAAAAGGGAAGAAAGTGATGAATTTGTTTATGAGGAAATCAACGATAA  
ACAAAACATGAACCTTCTTGAAGATATTGGGAAGTTGGCAGTTAAATGCTTGAGGAGGGATGTTAAAGTG  
CGCCCTGAAATGGTTGAAGTAGCAACCAAGTCTAAGAATGATTAGGAAAGATCTGGAGGGAGAACAAGGGA  
ATCTGACTCAGCAACATACAAGTACACCAAACTCAACTCCCTCAAAGAATGAAGGCTCAGCAGGACG  
CCAATTTGGCAATCTAAATATCTTCAAACAAGAGGAAATTAAGCATATGACAAGAACTACAGCATGACC  
TTTAGGGAAGAATTCCATGAACGTCTATACAATGGAGTTCTTGGCATGGTTTCATGCAGTTATAGTAAAC  
AAGTGAGTACATCTTCAAAAACCGACCGAGAAGTGTCTTGAAGACTATGGGCATACTATGCCAGAAGTA  
TCACAAAAATGTCGTAATGTTGCTGGCTTTCAATTAGGGGAATACATTTAGAGTGCCTGTATGAATCT  
TGCTGTGAATTATCCCAGGTAAATAATGGCCATATTTCTTCTCTAACCGAAACCTTTATGAGATCATCT  
GCTCCACGGAAAAATTTCTCTTTCATGTACGTTTGTCAATAGCTGTCCAGTGTGTTAGAGGGCTTGGTTCA  
TATCCATTCAATTTTATGCTGAAATCTGAATCGCTGGCACAAGCCTGTTTCGGAATTTTATAGGTCAGCC  
AATATTTTTCTAGACAAGAATTCATGCCAAAAGTTTTCAATGCCAATCTATCAACATTTCTCGGGCTTT

OsWAKs-Supplemental Data 1[1].txt

CGCCCGTGCAACAATGTACTGCCTCTGTTGATTGTATTTCATGACCAAAGATCACAAAAATATTATTTAGA  
 CCCAAAGGATGTTTCTGATCATCTGTTCAACCCCAAGTCTGATGTTTATAGCTTTGGAGTTGTTCTTTTG  
 GAACCTATTACTTTGGAAGACAGCGAAATACAAGTCTGGTGGACAGGCTCATATGCTTACGACAGACTTCC  
 TTGATACTTACAGAATAGACCATAGTGCAACAGACTTTTTTGTCAAGAAGGTTTATGACGAGGAAGGCAA  
 GTGTTTCCTTCATGAAGCCATTGCTATTGGAGTTGAGTGCCTAAAACCTTGATGTTCAAATGCGACCAGAA  
 ATGAGTGATGTTCTTTCCCGTCTCCGGATCATCTCTGCAGCTCAGAGTATCAGAAGCAAGCTCATGGGTC  
 CACAAGCAAAAGATTGTGGCGATAATGGACCTAGCCAATACATAGCCCCTACCCCTGTCAACAATGATGT  
 CAAAATTCCTTCTCCACCAACTTCTGCGTCGACCATTTGCTGGACATACTGAAGAAAATAACTAGGAAC  
 TTCAGTAACAATCCCTAATAGGAGAAGGCTCACACGCTAAAGTTTTCTTTGGAGTGCTTAAAGATGGAA  
 AAAATTCTGCAGTAAAGAAGCTCAATCCTAATGAAGAACTATAGTGCAGGTTTCGACCATTTCAAAAAAT  
 GTTGAAGCATGACAATGTTGTCCAAATTCATGAGTATTTTATTGAAGGGGAAAATCATGTTCTTGTTTAT  
 GAGTATGCACCAAAGGGCTCCTTGCATGATATTCTTCATGGTAGAGAAGGTGTCACAGGAGCCCAAGCAA  
 GACCACCTCTATCATGGGTGCAGCGAGTGAAGATTGCTATAACTGCTGCAAAAGGGCTTGAGTTCCTCCA  
 CGAGAAGGCCGTGCCTCCTGTCTACACCAACATCAAGTCCAGCAACATACTTCTCTTTGGCAATGAT  
 GTTGCAGAAAATAGGTGATCTCGGTGTCTCGAAGCAGCTTCATGTTGAAGATTATGATTACAGTTATACAC  
 GAGTAGTTCCACAGATTTTTCGCTATGAAGCACCAGAGTATGCAACACAGTGTTTCCATGCTTTCAGATT  
 GTTACACTAGAGCCTTGGCTTGGAAATGGCATGCATTACCTCCTACTGATATGCTCTTTCCTTCGTTGGT  
 TCTTGCTAGGTGCAGGTTGAGAGGACAGTATAGTGTAAAGAGCGATGTCTACGCCTTTGGGGTTGATTG  
 TTGGAGCTTTTAACTGGTCGCAAAGTATTTGATCATACACTTCCGCGTGGCCAGATGAGCCTTGTAATAAT  
 GGGCTACACCAAGGCTTAGTAAAGACAAGGTGAAACAATCGGTAGATCCAAAGCTTGGACGAGCATTTCCC  
 ACTCAAGGCTGTTGCCAGGGTAATAATATTCTTAAGCCTGGATGTTACTGTCTGTGTTTCAACAATTTTT  
 TTACATCATAATTGCATAAGAATTTCCGGAAGTTTCATTTGAGATCATGTTTTGCCTACATTGAATCTGA  
 ACTTCGTCAGCATAAATTATCTGTAGGGTCAAACAATCTGTTTCTGTTCTTCACTTTGAAAAACAGATG  
 GTTCTTTTTGCACATGTAACCTCATGGTTAGCTCCCATGTAAAGTTAGATATGAGGATAGGAAGCGCAGGT  
 TAGTTGAGGGCCTTGTTAATCCACATAAAACCCTCAGCAGTCTATCACACGAACAAGTCCCATTATGGAC  
 ATATTATATTTATATTCAAACCTTTC

>OsWAK4, gi |32974392|dbj |AK064374.1| *Oryza sativa* (japonica cultivar-group) cDNA  
 clone: 002-108-D05, full insert sequence

ACAATGTATAGTCCTGTTCTTCATGGTGATGTGAAACCTGCTAATATACTGTTAGATGAAAACCACTCAC  
 CAAAGATATCTGATTTTGAATAGCAAGATTGCTTTGTGCTAATGGGGCTCAACATACCAAAAAATATCAT  
 TGGTTCTATAGGTTATGTTGATCCTGCATTCTCGAGAATGGAATTCTAACCCCAAAGAGTGATGTTTAT  
 AGCTTTGGAGTGGTTTTGCTGGAGATAATCACCAGAAAGAAAGCAGTGGATGGGACCATCACCTTGCTC  
 AAAGTTTTCACTGATGCCATTGAAAAAGGGAAGAAAGTGATGAATTTGTTTGATGAGGAAATCAACGATAA  
 ACAAACATGAACCTCCTTGAAGATATTGGGAAGTTGGCAGTTAAATGCTTGAGGAGGGATGTTAAAGTG  
 CGCCCTGAAATGGTTGAAGTAGCAACCAAGTCTAAGAATGATTAGGAAAGATCTGGAGGGAGAACAAGGGA  
 ATCTGACTCAGCAACATAAGTACACCAACAACCTCAACTCCCTCAAAGAATGAAGGCTCAGCAGGACG  
 CCAATTGCGAATCTAATAATCTTCAAACAAGAGGAAATTAAGCATATGACAAGAACTACAGCATGACC  
 TTTAGGGAAGAATTCATGAACGTCTATACAATGGAGTTCTTGGCATGGTTTCATGCAGTTATAGTAAAC  
 AAGTGAGTACATCTTCAAAAACCGACCGAGAAGTGTTTCTGAAGACTATGGGCAAACCTATGCCAGAAGTA  
 TCACAAAAATGTCGCTAATGTTGCTGGCTTTCATTTAGGGGAATACATTTAGAGTGCGTGTATGAATCT  
 TGCTGTGAATTATCCCAGGTAATAATGGCCATATTTCTTCTCTAACCAGAAACCTTTATGAGATCATCT  
 GCTCACGGAAAACTTCTCTTCATGTACGTTTGTCAATAGCTGTCCAGTGTTTGAAGGGCTTGGTTCA  
 TATCCATTCATTTTTAGCTGAAAATCCTGAATCGCTGGCACAAGCCTGTTGCGAAATTTTAGGTCAGCC  
 AATATTTTTCTAGACAAGAATTCATGCCAAAAGTTTTCAATGCCAATTCATCAACATTTCTCGGGCTTT  
 GCGCCGTGCAACAATGTACTGCCTCTGTTGATTGTATTTCATGACCAAAGATCACAAAAATATTATTTAGA  
 CCCAAAGGATGTTTCTGATCATCTGTTCAACCCCAAGTCTGATGTTTATAGCTTTGGAGTTGTTCTTTTG  
 GAACCTATTACTTTGGAAGACAGCGAAATACAAGTCTGGTGGACAGGCTCATATGCTTACGACAGACTTCC  
 TTGATACTTACAGAATAGACCATAGTGCAACAGACTTTTTTGTCAAGAAGGTTTATGACGAGGAAGGCAA  
 GTGTTTCCTTCATGAAGCCATTGCTATTGGAGTTGAGTGCCTAAAACCTTGATGTTCAAATGCGACCAGAA  
 ATGAGTGATGTTCTTTCCCGTCTCCGGATCATCTCTGCAGCTCAGAGTATCAGAAGCAAGCTCATGGGTC  
 CACAAGCAAAAGATTGTGGCGATAATGGACCTAGCCAATACATAGCCCCTACCCCTGTCAACAATGATGT  
 CAAAATTCCTTCTCCACCAACTTCTGCGTCGACCATTTGCTGGACATACTGAAGAAAATAACTAGGAAC  
 TTCAGTAACAATCCCTAATAGGAGAAGGCTCACACGCTAAAGTTTTCTTTGGAGTGCTTAAAGATGGAA  
 AAAATTCTGCAGTAAAGAAGCTCAATCCTAATGAAGAACTATAGTGCAGGTTTCGACCATTTCAAGAAT  
 GTTGAAGCATGACAATGTTGTCCAAATTCATGAGTATTTTATTGAAGGGGAAAATCATGTTCTTGTTTAT  
 GAGTATGCACCAAAGGGCTCCTTGCATGATATTCTTCATGGTAGAGAAGGTGTCACAGGAGCCCAAGCAA  
 GACCACCTCTATCATGGGTGCAGCGAGTGAAGATTGCTATAACTGCTGCAAAAGGGCTTGAGTTCCTCCA  
 CGAGAAGGCCGTGCCTCCTGTCTACACCAACATCAAGTCCAGCAACATACTTCTCTTTGGCAATGAT  
 GTTGCAGAAAATAGGTGATCTCGGTGTCTCGAAGCAGCTTCATGTTGAAGATTATGATTACAGTTATACAC  
 GAGTAGTTCCACAGATTTTTCGCTATGAAGCAGAGTATGCAACACAGTGTTTCCATGCTTTCAGATT  
 GTTACACTAGAGCCTTGGCTTGGAAATGGCATGCATTACCTCCTACTGATATGCTCTTTCCTTCGTTGGT



OsWAKs-Supplemental Data 1[1].txt

TCTTGCTAGGTGCAGGTTGAGAGGACAGTATAGTGTAAGAGCGATGTCTACGCCTTTGGGGTTGTATTG  
TTGGAGCTTTTAACTGGTCGCAAAGTATTTGATCATACACTTCCGCGTGGCCAGATGAGCCTTGTAAAT  
GGGCTACACCAAGGCTTAGTAAAGACAAGGTGAACAATGCGTAGATCCAAAGCTTGGACGAGCATTCCC  
ACTCAAGGCTGCTGCCAGGGTAATAATATTCCTAAGCCTGGATGTTACTGTCTGTGTTTCACAATTTTTT  
TTACATCATAATTGCATAAGAATTTGCGGAAGTTTCATTTGAGATCATGTTTTGCCTACATTGAATCTGA  
ACTTCGTGAGCATAAATTATCTGTAGGGTCAAACAATCTGTTTCTGTTCTTCACTTTGAAAAAACAGATG  
GTTTCTTTTGCACATGTAACATCATGGTTAGCTCCCATGTAAAGTTAGATATGAGGATAGGAAGCGCAGGT  
TAGTTGAGGGCCTTGTTAATCCACATAAAACCCTCAGCAGTCTATCACACGAACAAGTCCCATTATGGAC  
ATATTATATTTATATTCAAACCTTC

>OsWAK5, (gi |13486765: 44067-44910, 45259-45408, 46007-47190) *Oryza sativa* (japonica cultivar-group) genomic DNA, chromosome 1, PAC clone: P0503E05

ATGGCATCAGCGATACTGCTCAGTATTGCAATCATGGCACAACATCATCTATATCAGCTCAGCCGGCTC  
CTGGATGCCAGTCCCATTGCGGTGATATGGAAATCCCATACCCATTTGGCATTGGCACAGAGTGTGCTAT  
CGAACCGGGCTTCGTAATCTATTGCAACAAGACTGCTGATGGATCTATGAAACCATTTCCTTATTAATGTT  
GAGGTCTAAATATTTGTTGCTCCATGGTCAAACCTAGGGCACTAAATGCCCTGTCGACATATTGCTACA  
ATGATGTAACAAAGTCAATGGAATCTAGCCGATGGTCACTTGACTTTTCAACATGGCCATACCGGTTCTC  
TAATCTGCACAATAAGTTTGTAGTCATTGGTTGCAACACTCTTTCATACATCTACAATGGAGAGTATACG  
ACAGCATGTGCATCAGTCTGCGCAAAAGCCCCCTACAAATGACTCATGCGATGGTGTGGCTGCTGCCAAA  
ATAACATAGCCAAGGGATTAATAGTTATAACGTACGTTCTTCACTGTGTACAATGATTGTCGAATTT  
GCAGTCTAACCCATGTAGCTACGCAGCACTGGTGGAACAGACACGTTTAGGTTCAAAACTGAGTACGTA  
ACTACTATGAAGTTCAATGAGACATAACAATGGACAGCAGCCGGTGGTACTAGACTGGGCAATTGGGAAGG  
TTGGATGCAAGGAGGCAACATGACTTCTTACGCATGCCGTAGCAAACATAGCGAGTGTGTAGATTTCGAT  
CAATGGACCTGGGTATCTATGTAACATGCACTCTTGGGTATCATGGAATCCATACATCACTGATGGATGC  
ATAGATGTCAATGAATGTGAGCAAAATCAAAGCCCATGCCAAAAGGTGCAACTTGTGCAATACAGAAG  
GATGGTACCATTGTTCTTGGCCTGTGGGAAGAAAGTTGGCAAAGGAAACAAACACTTGAACCCAGACAT  
CAGCCTGATCATAGGTGTGACGATTGGCTCCATTGTTCTAGTGATTATCATTTTTCTTCGTGCGTATAAAT  
TTTGAGAGAAGAAAGCTTACAGATGTCAAGAAAAAATACATCCAGGAACATGGAGGGCTGCTATTATTTG  
AGAAGATGAAATCAGACCAGGGACTTGCATTTAAGGTGTTCACTCAAGCAGAAGTACAGCAAGCAACAAA  
CAAGTTTGAGAAAAGCCAGATTCTTGGACATGGAGGACATGGCACAGTGTACAAGGGAATAACTAAGGAT  
AACATTACAGTGGCAATTAATAAATGTGCACTAATTGATGATAGACATAAGAAGGAATTCGGTAAAGAAA  
TGTTAATACTTTTACAGATTAAACCACAAGAACATTGTTAAGCTACTGGGTTGCTGTCTTGAGGTGGATGT  
CCCGATGCTAGTGTATGAGTTTCAATCCAAATGGAACATTATTTGATCTTATTCATGGCAAGAACCCTACT  
CTTCATATCCCTTTTCACTTCTCTCTAAGAATTGTTAATGAGGCAGCTGAAGGGCTTGCATTTTTACATT  
CCTACGCAATCCACCAATTTTGCATGGTGACGTGAAAACATCCAATATCCTTCTTGATGAGAATTACAT  
GGCAAAGGTATCAGATTTTGGCGCTCCATATTAGCACCAATGATGAAGCGCAGTTCGTGACAATGGTT  
CAAGGAACATGTGGATATCTGGATCCTGAATATCTACAAACATGCCAGTTGACAGAGAAGAGTGTGTGT  
ATAGCTTTGGTGTGTCATCTTGGAGATCCTTACTGGGCAGATGCCATTGAACTTGAAGTTCTGAGCT  
ACAGAAAAGCTTGTGATCAAGCTTCTATTGGCAATGAAGGAGAATAATCTTGAGGCCATGCTAGATAGC  
CAAATTAAGGTGATGAGAGCATGGAACCTGCTCAGTGGACTTGTGAGCTAGCGAAGCAATGCTTGGACA  
TGTGCACTGAGAATAGGCCATCAATGAAAGACGTAGCTGAGGAGATTAGCAGACTAAGAAAACCTTTCGAA  
ACATCCTTGGATACAGCGTGATAGTGAGACAGAGGGCTATCTCAGTGGACCATCAACCAGTAACCTTGA  
ATTGAGCAAAGCACTGAGTACACAAGGAAGGACGAACAAATGCCCATAAACCAAGCACTTCGTATTTTA  
TCCGGTGA

>OsWAK5, (gi |13486765: 44067-44910, 45259-45408, 46007-47190) *Oryza sativa* (japonica cultivar-group) genomic DNA, chromosome 1, PAC clone: P0503E05

ATGGCATCAGCGATACTGCTCAGTATTGCAATCATGGCACAACATCATCTATATCAGCTCAGCCGGCTC  
CTGGATGCCAGTCCCATTGCGGTGATATGGAAATCCCATACCCATTTGGCATTGGCACAGAGTGTGCTAT  
CGAACCGGGCTTCGTAATCTATTGCAACAAGACTGCTGATGGATCTATGAAACCATTTCCTTATTAATGTT  
GAGGTCTAAATATTTGTTGCTCCATGGTCAAACCTAGGGCACTAAATGCCCTGTCGACATATTGCTACA  
ATGATGTAACAAAGTCAATGGAATCTAGCCGATGGTCACTTGACTTTTCAACATGGCCATACCGGTTCTC  
TAATCTGCACAATAAGTTTGTAGTCATTGGTTGCAACACTCTTTCATACATCTACAATGGAGAGTATACG  
ACAGCATGTGCATCAGTCTGCGCAAAAGCCCCCTACAAATGACTCATGCGATGGTGTGGCTGCTGCCAAA  
ATAACATAGCCAAGGGATTAATAGTTATAACGTACGTTCTTCACTGTGTACAATGATTGTCGAATTT  
GCAGTCTAACCCATGTAGCTACGCAGCACTGGTGGAACAGACACGTTTAGGTTCAAAACTGAGTACGTA  
ACTACTATGAAGTTCAATGAGACATAACAATGGACAGCAGCCGGTGGTACTAGACTGGGCAATTGGGAAGG  
TTGGATGCAAGGAGGCAACATGACTTCTTACGCATGCCGTAGCAAACATAGCGAGTGTGTAGATTTCGAT  
CAATGGACCTGGGTATCTATGTAACATGCACTCTTGGGTATCATGGAATCCATACATCACTGATGGATGC  
ATAGATGTCAATGAATGTGAGCAAAATCAAAGCCCATGCCAAAAGGTGCAACTTGTGCAATACAGAAG  
GATGGTACCATTGTTCTTGGCCTGTGGGAAGAAAGTTGGCAAAGGAAACAAACACTTGAACCCAGACAT  
CAGCCTGATCATAGGTGTGACGATTGGCTCCATTGTTCTAGTGATTATCATTTTTCTTCGTGCGTATAAAT  
TTTGAGAGAAGAAAGCTTACAGATGTCAAGAAAAAATACATCCAGGAACATGGAGGGCTGCTATTATTTG

OsWAKs-Supplemental Data 1[1].txt

AGAAGATGAAATCAGACCAGGGACTTGCATTTAAGGTGTTCACTCAAGCAGAACTAGAGCAAGCAACAAA  
CAAGTTTGAGAAAAGCCAGATTCTTGGACATGGAGGACATGGCACAGTGTACAAGGGAATACTAAGGAT  
AACATTACAGTGGCAATTAAGGAAATGTGCATAATTGATGATAGACATAAGAAGGAATTCGGTAAAGAAA  
TGTTAATACTTTACAGATTAACCACAAGAACATTGTTAAGCTACTGGGTTGCTGTCTTGAGGTGGATGT  
CCCGATGCTAGTGTATGAGTTCATTCCAAATGGAACATTATTTGATCTTATTCATGGCAAGAACCCTACT  
CTTCATATCCCTTTAGTTCTCTCCTAAGAATTGTTAATGAGGCAGCTGAAGGGCTTGCATTTTTACATT  
CCTACGCAAATCCACCAATTTTGCATGGTGACGTGAAAACATCCAATATCCTTCTTGATGAGAATTACAT  
GGCAAAGGTATCAGATTTTGGCGCCTCCATATTAGCACCAATGATGAAGCGCAGTTCGTGACAATGGTT  
CAAGGAACATGTGGATATCTGGATCCTGAATATCTACAAACATGCCAGTTGACAGAGAAGAGTGATGTGT  
ATAGCTTTGGTGTGGTCATCTTGGAGATCCTTACTGGGCAGATGCCATTGAAACTTGAAGGTTCTGAGCT  
ACAGAAAAGCTTGTCAAGCTTCTATTGGCAATGAAGGAGAATAATCTTGAGGCCATGCTAGATAGC  
CAAATTAAGGTCATGAGAGCATGGAAGTCTCAGTGGACTTGCTGAGCTAGCGAAGCAATGCTTGGACA  
TGTGCAGTGAGAATAGGCCATCAATGAAAGACGTAGCTGAGGAGATTAGCAGACTAAGAAAACCTTCGAA  
ACATCCTTGGATACAGCGTGATAGTGAGACAGAGGGCTATCTCAGTGGACCATCAACCAGTAACCTTTGAA  
ATTGAGCAAAGCACTGAGTACACAAGGAAGGACGAACAAATGCCATAAACCACAGCACTTCGTATTTTA  
TCCGGTGA

>OsWAK6, 2768.t00013, Chromosome 1, pre-processing

ATGACTATTCTTTCCCTTTCGGGCTCCAAGAAGAATGCTCCGCAAATAGAAAATTCCTT  
CTGAATTGTACTTCCAAGCAAGCATTTATTGGAGGATCATACACGCAATATCAAGTGACG  
AATATTTCACTAGATCAAGGGCTTCTGTTTGTCAACTTTTCTCAGCACGAAGAGGCCTAC  
TCAGAATTGGTAGAAATAAGCAGAGATAACATCTCACAGTGGGTGGAGTCCTGGATTGAC  
GAATTCACGATTTTGTGCTCTCAGCATTACGGTATTTGGAAGTGGTTTGTGACCAAC  
ATGACTTGTGAAAAGGCTAAAAAATCATCTGCTTATGCCTGCATTAGCACCAACGGTGAG  
TGTAAGTGGTGTACGCATGGACATGTGCATTTGGGATATCGTTGCAAGTGTCTACTGGC  
TACGAAGGAAATCCGTACGTACATAACGGTTGCATAGGTAAAGAAACCAGTTTGTGGCAA  
TATCGACAAAAATCGTTATTATGAACCTTCAATTAGTAGCCATTGTATATTTGTTTTGCAG  
ATATTGACGAGTGTCTGATACCCAATGATTGTAAGGGAATGTGCCACAACCAAGCAGGAG  
GCTACAGTTGCACTCGTTGCCCTCATGGCACATCTTTCGATCCAGCCGAAAGGAAATGCA  
CTTCCACCAAGCAACATAATATTGTCTTGGGTATTTCTCACTTTAACCGATCCCTTTTCA  
ATAAGATCACAGTCAAGTACGAAGCATAACCATATTAATTACCTATGTATGTAGGAATTG  
CCAGTGGACTTAGCTGTGGCTTTGGAGTGTTAATTTCTTACCTTAAGTGTGACAATGTTAT  
TTTGGAGGTGGAAGAGAGGCCATTCAAAAGAAAAATTAGAAGGGATTACTTCCATAAAAAATA  
AAGGTTTACTATTGGAACAATTGATTTCTTGTGATGACAGTGTGCGCATAAGACAAAAGA  
TATTTTCTTTAGATGAATTAGAGAAGGCAACAAACAATTTTGAATCAACACGGATTCTCG  
GTAGTGGAGGCCATGGCACTGTTTACAAGGGCATTTTATCTGACCAACGCGTAGTAGCAA  
TAAAAAATCCAAAATTGTGGAGCAGAGTGAGATTGATCAGTTTGTCAATGAAGTTGCTA  
TGTTATCTCAAAATCATCCATGTAATGTGGTCAAGCTTTTTGGCTGTTGCTTAGAATCCG  
AGGTTCTCTACTTGTTTATGAGTTCATATCAAAATGGGACACTATATGATCTTCTCCATG  
GTAATTTGCAAAGCAAATGTGTATTAACATGGTGAATCGCATCAGAATTGCCCTTGAGG  
CTGCAAGCGCTCTTGCTATCTCCATTGTGCTGCCTCGGTACCAATATTTATAGAGATG  
TGAAATCTGCCAATATACTTCTCGATGATAATTTCACTACAAAGGTTTCAAGTTTTGGTG  
CTTCAAGATCTGTTTCTATTGATGAAACTCACGTGGTCACAATAGTGAAGGTACATTTG  
GATACCTTGGATCTGTAATATTATCATACAGGACAATTAATGAGAAGAGTGACGTTTACA  
GTTTTGGTGTAATACTTATTGAGCTTATAACAAGGAAAAGGCCAATCTTCTCAATTCAA  
TTGGAGAAAAGCAGAACCTGTGTCTACTTTCTTCAAAGACAGCAAAACAATACCAT  
CAGAAATAGTAGATGTACAGGTTTTGGAAGAAGCAGACAGTGGGAAATTGATGAGATTG  
CTTCGCTTGAGAGATATGCTTGAAGGCTTAGAGGAGAACAGAGACCAAAAATGAAAGAAG  
TGGAGCTAAGGCTGCAACTTCTGAGGAGTAAAGTAGCAAAGAAGAAGATAGAGTAGAAG  
TAAGCAGGGAAAAATGAAATTGATCCATTACTGCTTTATACGCCAGCTCTAGTTCCGTGA  
ACCCAAGGGATTTTAATTCGGCAAGTCACAATGATGCCACTCGATGCTACACCATGGAGC  
AAGAATTGGTTTCTTGGACCAATTTACCTCGCTAAATATAACATTACTTTTTAAGTAACT  
CGGTATTTTTTAATAGCTAAACATACAATTCAACACCTACCTTAATAATACTTAAATG  
AAACATTAGATTACTCTCTAAAATTTGAAAACACTATTGTGGTGTGTTTATTGTATCA  
GTCTATTGGATAA

>OsWAK6, 2768.t00013, Chromosome 1, post-processing

ATGACTATTCTTTCCCTTTCGGGCTCCAAGAAGAATGCTCCGCAAATAGAAAATTCCTT  
CTGAATTGTACTTCCAAGCAAGCATTTATTGGAGGATCATACACGCAATATCAAGTGACG  
AATATTTCACTAGATCAAGGGCTTCTGTTTGTCAACTTTTCTCAGCACGAAGAGGCCTAC  
TCAGAATTGGTAGAAATAAGCAGAGATAACATCTCACAGTGGGTGGAGTCCTGGATTGAC  
GAATTCACGATTTTGTGCTCTCAGCATTACGGTATTTGGAAGTGGTTTGTGACCAAC  
ATGACTTGTGAAAAGGCTAAAAAATCATCTGCTTATGCCTGCATTAGCACCAACGATATT

OsWAKs-Supplemental Data 1[1].txt

GACGAGTGCTCGATACCCAATGATTGTAAGGGAATGTGCCACAACCAAGCAGGAGGCTAC  
AGTTGCACTCGTTGCCCTCATGGCACATCTTTGATCCAGCCGAAAGGAAATGCACTTCC  
ACCAAGCAACATAATATTGTCTTGGGTATTTCTCACTTTAACCGATCCCTTTTCAATAAG  
ATCACAGTCAAGTGGAAGAGAGGCATTCAAAAGAAAATTAGAAGGGATTACTTCCATAAA  
AATAAAGGTTTACTATTGGAACAATTGATTTCTTGTGATGACAGTGTTGCGCATAAGACA  
AAGATATTTTCTTTAGATGAATTAGAGAAGGCAACAACAATTTTGAAGTCAACACGGATT  
CTCGGTAGTGGAGGCCATGGCACTGTTTACAAGGGCATTTTATCTGACCAACGCGTAGTA  
GCAATAAAAAAATCCAAAATTGTGGAGCAGAGTGAGATTGATCAGTTTGTCAATGAAGTT  
GCTATGTTATCTCAAATCATCCATCGTAATGTGGTCAAGCTTTTTGGCTGTTGCTTAGAA  
TCCGAGGTTCTCTACTTGTATGAGTTCATATCAAATGGGACACTATATGATCTTCTC  
CATGGTAATTTGCAAAGCAAATGTGTATTAACATGGTGAATCGCATCAGAATTGCCCTT  
GAGGCTGCAAGCGCTCTTGCTATCTCCATTGTGCTGCCTCGGTACCAATATTTCATAGA  
GATGTGAAATCTGCCAATATACTTCTCGATGATAATTTCACTACAAAGGTTTCAAGTTTT  
GGTGCTTCAAGATCTGTTTCTATTGATGAAACTCACGTGGTCACAATAGTGAAGGTACA  
TTTGGATACTTGGATCCTGAATATTATCATACAGGACAATTAATGAGAAGAGTGACGTT  
TACAGTTTTGGTGAATACTTATTGAGCTTATAACAAGGAAAAGGCCAATCTTCTCAAT  
TCAATTGGAGAAAAGCAGAACCTGTGTCATCACTTTCTTCAAAGACAGCAAAACAATACC  
ACATCAGAAATAGTAGATGTACAGGTTTTGGAAGAAGCAGACCAGTGGGAAATTGATGAG  
ATTGCTTCGCTTGAGAGATATGCTTGAGGCTTAGAGGAGAACAGAGACCAAAAATGAAA  
GAAGTGGAGCTAAGGCTGCAACTTCTGAGGAGTAAAGTAGCAAAGAAGAAGATAGAGTA  
GAATCTATTGGATAA

>OsWAK7, 2768. t00019, Chromosome 1, pre-processing

ATGTCCCCAAAACACTACTTCTCAGTGTTGCACTAGTCATGCTGCATCTAGCGTCTATATCT  
GCGCAGCCTAACCTTGGTGCAAAAAACAATGTGGTGATGTCAAAATCCCTTATCCGTTT  
GGCATTGGCACTGGATGTGCTATTGGTGAAGGCTTTGAGATCATTTGCAACAGGAATGCT  
GATGGAATTGACCAGCCATTACCCGGTAACATCGAAGTTCTAGACATCTCAGTGGTTTAC  
GGTCAAGCCGAGTATTAGGCTCCATCACCACAAACTGCTACAACCTCCAGTACAGGATCA  
GCGAATGTCAATTCCTGGTGGATGGATTTATCAACATCGCCATACCGTTTCTCTGATGCG  
TACAACACGTTTGTAGTCATTGGGTGCAATACGCTCGCATATATCTACAACGGACTGAAC  
AGAACATCATATACAACCTGCATGTGCATCAGTGTCGGAGGACCAGAAGACCTGACAAAT  
GGTTTCATGCCTCGGAGTGGGCTGCTGCCAAAATGCCAATGCCATACCCAAGGTTTAACT  
CGCCAAGATATCTATTTGTATACTATTTACAATACTTCAGAATCAGATAGTTGGAAGTTC  
AACCCATGCAGCTATGCTGCACTGGTAGAAACAGAGTCATTTAGTTTCAGCACAGAGTAC  
ATAACTACCATGAGGTTCAATGATACCTATGAGGGGCAGCAGCCGCTAGTGCTGGACTGG  
GCAATAGGAGATGTGCTTTCGAGGTTGGCGAAAAACATGACTTCATATGCATGCCATAGT  
GGGAATAGTATTTGTGTGGATTGCAAAAACGGCCCAGGGTATCTCTGCAACTGCTCAGAA  
GGGTATCAAGGAAACCTTACCTCCCTGATGGATGCACAGGCAAGTTTTCTCTTCACTC  
TGCAATTCCTTATCCTTATATCTTCAGTTCAACGAGATCTTGAATGATGTACTTAGTGAT  
TATCTTAAAGGTGTAAATTTAAAACCATCATTTCCAATGAGCAAGGTGATATGCAACAAA  
AGGGACGATACATCATATATAGGAGGAATTAGTTCTTTTTTCTATTAG

>OsWAK7, 2768. t00019, Chromosome 1, post-processing

ATGTCCCCAAAACACTACTTCTCAGTGTTGCACTAGTCATGCTGCATCTAGCGTCTATATCT  
GCGCAGCCTAACCTTGGTGCAAAAAACAATGTGGTGATGTCAAAATCCCTTATCCGTTT  
GGCATTGGCACTGGATGTGCTATTGGTGAAGGCTTTGAGATCATTTGCAACAGGAATGCT  
GATGGAATTGACCAGCCATTACCCGGTAACATCGAAGTTCTAGACATCTCAGTGGTTTAC  
GGTCAAGCCGAGTATTAGGCTCCATCACCACAAACTGCTACAACCTCCAGTACAGGATCA  
GCGAATGTCAATTCCTGGTGGATGGATTTATCAACATCGCCATACCGTTTCTCTGATGCG  
TACAACACGTTTGTAGTCATTGGGTGCAATACGCTCGCATATATCTACAACGGACTGAAC  
AGAACATCATATACAACCTGCATGTGCATCAGTGTCGGAGGACCAGAAGACCTGACAAAT  
GGTTTCATGCCTCGGAGTGGGCTGCTGCCAAAATGCCAATGCCATACCCAAGGTTTAACT  
CGCCAAGATATCTATTTGTATACTATTTACAATACTTCAGAATCAGATAGTTGGAAGTTC  
AACCCATGCAGCTATGCTGCACTGGTAGAAACAGAGTCATTTAGTTTCAGCACAGAGTAC  
ATAACTACCATGAGGTTCAATGATACCTATGAGGGGCAGCAGCCGCTAGTGCTGGACTGG  
GCAATAGGAGATGTGCTTTCGAGGTTGGCGAAAAACATGACTTCATATGCATGCCATAGT  
GGGAATAGTATTTGTGTGGATTGCAAAAACGGCCCAGGGTATCTCTGCAACTGCTCAGAA  
GGGTATCAAGGAAACCTTACCTCCCTGATGGATGCACAGGCAAGTTTTCTCTTCACTC  
TGCAATTCCTTATCCTTATATCTTCAGTTCAACGAGATCTTGAATGATGTACTTAGTGAT  
TATCTTAAAGGTGTAAATTTAAAACCATCATTTCCAATGAGCAAGGTGATATGCAACAAA  
AGGGACGATACATCATATATAGGAGGAATTAGTTCTTTTTTCTATTAG

>OsWAK8, 2768. t00020, Chromosome 1, pre-processing

OsWAKs-Supplemental Data 1[1].txt

ATGGAGATGAGGGGAGGAAGAAGAGAGAGAGGTTGAGGGGAAAGAGATAGAGAGGGTAAGA  
 GACTGACAGGTGGGCCCCGCTGATTTTTTAAAAAAAATTGCTGACTGGACTATCACGT  
 AGGATTTAAACCACTCTGGTTTAAAGTCAAGGGGATAATTTGTCTGGTATTGATAATTGAG  
 GGTGAAATATATCTAGTTTTCGGGTTTTAGGGGGGTAATTCGTAATCACCCTAAGTTCA  
 GGGGTGTAATTCGGACTTTTCTCTATTGCATATGAGCATTATATATGGTCAATTTGGAT  
 TCGTATAATCATGTCTATAAGTTTTACATTTAAAGATAGCTATTTATCTATTGTGTTTTA  
 AATTCTAGACTGATAGTAGTAAGGATCCATTGAAGCATTGTGATGGACATGATAGCTAATT  
 TGCAACGATTGATTGGGAAATATTTTTATGTGTAATGCAGATGTCAATGAATGCGAGCAG  
 AATCCAAGTCCATGCACAAAGGGTGAACCTTGTGCAATACAATAGGATGGTACTATTGT  
 TCTCGGCCTTCTTGCCCTCTGGGAAGAAAGTTGGCAAGGGAAACAAACACATGCAACCCA  
 GACATCAACCTTATCATAGGTAATAGCTAGAGGTTAATTAGGAGCTTACTCTACTTTTT  
 GCAAAATAGGTAACTGCGCCTGCTCCTGCAACTCTATTCTAGGTCAGGAAGATAATTCA  
 TAAGCTTAGTTAGTAATAAAGTGGTCCCTTATGTAAATGGTACATATCTGCCCATGTGCA  
 TGGTATCATAAATCACAAATGCAGAAATGCTTCAATGAATGAGCAGCTACAAGCACACAA  
 GGAAAAAAAAGGCACAAAAGCATCTGAACCGCAGAGCATGAAAGAACAAAATGGCATGA  
 GCTTGCTACTAGGCCATGCCAAGAATCTGAAAAGGAGAAGACAAGAGAGTAATATAATAA  
 TATCTGTAATTGTAGTAATAGTAATGCTACTGCTACTAATAACAGTAATAAATTGTA  
 GTCCATTGACATGCTAATGTGTGGAATTAATTTTACATTATACAGGTATCTGTATTGGCT  
 CTGTTGCTCTAGTGATCACCATTTTCTTCATGCGTTTGATGTTTGAGCGAAGAAAGCTTA  
 CAGATGTCAAGAAAAAATATTTTTCAGCAACACGGAGGACTGATATTATTTGATAAGATGA  
 AATCGGATCAGGGACTTGCATTTTAAAGGTGTTCACTCAAGCCGAACAGAACATGCAACAA  
 ATAAGTTTGAGAAAAGCCAGATTCTTGACATGGAGGACATGGCACCGTGTACAAGGGTA  
 TAACAAAGGATAACATTACAGTGGCAGTTAAAAAATGTGCATTGATTGATGATAGGCATA  
 AGAAGGAATTTGGTAAAGAAATGTTAATCCTTTACAGATCAACCACAAGAACATTGTTA  
 AGCTGCTGGGTTGCTGCCTTGAGGTGGATATCCCAATGCTAGTGTATGAGTTCATCCCAA  
 ATGGAACATTATTTGATCTTATTCATGGCAAGAACCGTACGTTTCATATCCCTTTTAGTT  
 CTCTCCTAAGAATCGTCAATGAAGCAGCTGAAGGGCTTGCATTTTACATTCTATGCAA  
 ACCCACCAATTTTGCATGGCGATGTGAAAACCTCTAACATCCTTCTTGATGAGAACTACA  
 TGGCAAAGGTGTCAGATTTTGGAGCCTCCATATTAGCACTAAGTGATGAAGACCAATTTG  
 TGACAATGGTTCAAGGGACATGTGGCTATCTAGATCCGGAATATCTGCAACATGCCGAT  
 TGACAGACAAGAGCGATGTTTACAGCTTTGGTGTGGTCTTTTGGAGGTCATGACTGGGC  
 AGATGCCATTGAAATTTGAAGTCTCTGAGATTCAGAAAAGCTTGTCAAGTTTCTTAC  
 TGGCAATGAAGGAGAATAATCTTGAGGCCATGTTGGACAGTCAAATTAAGATCATGAGA  
 GCATGGAAGTCTAAGTGGGCTTGACAGACATAGCTAAGAAATGCTTAGACATGTGCAGTG  
 ACAATAGGCCATCAATGAAAGAGGTATCTGAGGAGCTTAGCAGACTACGAAAATTTTCAA  
 AACACCTTTGGATACAACGTGATACTGAGATAGAGAGCTTTCTCAGTGGACCATCAACTA  
 GTAACCTAGAACTGAGCACAGCTATCTCAGTGGACCATCAACCAGTAACCTTTGAAATCG  
 AGCACAACACCGAGTATAGAAGGAAGGATGAAGAAATGCCCATAAACCAAGCACTTCAT  
 ACTTTATCCGGTGA

>OsWAK8, 2768.t00020, Chromosome 1, post-processing

ATGGAGATGAGGGGAGGAAGAAGAGAGAGAGATGTCAATGAATGCGAGCAGAATCCAAGT  
 CCATGCACAAAGGGTGAACCTTGTGCAATACAATAGGATGGTACTATTGTTCTCGGCCT  
 TCTTCCCTCTGGGAAGAAAGTTGGCAAGGGAAACAAACACATGCAACCCAGACATCAAC  
 CTTATCATAGGTATCTGATTGGCTCTGTTGCTCTAGTGATCACCATTTTCTTCATGCGT  
 TTGATGTTTGAGCGAAGAAAGCTTACAGATGTCAAGAAAAAATATTTTTCAGCAACACGGA  
 GGACTGATATTATTTGATAAGATGAAATCGGATCAGGGACTTGCATTTAAGGTGTTCACT  
 CAAGCCGAACAGAACATGCAACAAATAAGTTTGAGAAAAGCCAGATTCTTGACATGGA  
 GGACATGGCACCGTGTACAAGGGTATAACAAAGGATAACATTACAGTGGCAGTTAAAAAA  
 TGTGCATTGATTGATGATAGGCATAAGAAGGAATTTGGTAAAGAAATGTTAATCCTTTCA  
 CAGATCAACCACAAGAACATTGTTAAGCTGCTGGGTTGCTGCCTTGAGGTGGATATCCCA  
 ATGCTAGTGTATGAGTTCATCCCAAATGGAACATTATTTGATCTTATTCATGGCAAGAAC  
 CGTACGTTTCATATCCCTTTTAGTTCTCTCCTAAGAATCGTCAATGAAGCAGCTGAAGGG  
 CTTGCATTTTACATTCTATGCAAACCCACCAATTTTGCATGGCGATGTGAAAACCTCT  
 AACATCCTTCTTGATGAGAACTACATGGCAAAGGTGTGAGATTTTGGAGCCTCCATATTA  
 GCACTAAGTGATGAGAACCAATTTGTGACAAATGGTTCAAGGGACATGTGGCTATCTAGAT  
 CCGGAATATCTGCAACATGCCGATTGACAGACAAGAGCGATGTTTACAGCTTTGGTGTG  
 GTCCTTTTGGAGGTGATGACTGGGCAGATGCCATTGAAATTTGAAGGTCTGAGATTCAG  
 AAAAGCTTGTCAAGTTTCTACTGGCAATGAAGGAGAATAATCTTGAGGCCATGTTG  
 GACAGTCAAATTAAGATCATGAGAGCATGGAACCTGCTAAGTGGGCTTGACAGACATAGCT  
 AAGAAATGCTTAGACATGTTCAGTGACAATAGGCCATCAATGAAAGAGGTATCTGAGGAG  
 CTTAGCAGACTACGAAAATTTTCAAACACCTTTGGATACAACGTGATACTGAGATAGAG  
 AGCTTTCTCAGTGGACCATCAACTAGTAACCTAGAACTGAGCACAGCTATCTCAGTGGG

CCATCAACCAGTAACCTTTGAAATCGAGCACAAACCCGAGTATAGAAGGAAGGATGAAGAA  
ATGCCCATAAACCCAAGCACTTCATACTTTATCCGGTGA

>OsWAK9, 2768.t00022, Chromosome 1, pre-processing  
ATGAAGGCCGAGCGGAATAACACTGTCCTTTTTGAAATAAAATTTGGGAGATACAATTTT  
AATGGTATTTTTCTATATGGCAATCTTTGCATCAAGATGCAACAAATTTGCTAAGCAAAA  
TATGATAACATAATTTCCACGAAAAATTTGATAAGTTTAAAGATGAAAGTTTATACAGC  
TGTCTTCACACATATTTGGATTAATAAACTTGATCACATAGATGTTAGTAGTAGTTTATG  
AAAAAAAACATATTCGTTATGCGGACTTGTAGTTGAATCTACTTTAATTTGCAGGGGT  
TGTTATTGGACTAGTTGTTGGTACTGGAGTTCTAGCCCTTTCATTAGTCCTAACTATATT  
ACTGCGAAGGTGGAAGCGAGGTATTCAAAAGAAAATTCGAAGGGCATACTTCCGAAAAAA  
CAAAGGTCTTGTCTGGAACGACTAATATCATCAGATGAAAGTGTGGCACATAGTACAAA  
AATATTTTCTTTGGAGGAGTTAGAAAAGAGCACCTGACCATTTTAATTCACACGCATTCT  
TGGAAGGGGAGGCCATGGAATAGTTTATAAGGGTATATTATCAGATCAGCGTGTGTAGC  
CATAAAAAGGTCTAAAATTGTAGAGCAAGGTGAGATTGATCAATTTGTCAATGAAGTGGC  
TATCTTATCCCAAATCATTATCGCAATGTAGTTAAGCTTTTCGGTTGTTGTTTGAATC  
CGAGGTACCTTTGCTCGTGTATGAGTTCATCTCTAATGGGACACTTTATGACATTCTACA  
TGGCGATATGAGCACTGAATGCTCATTGAAATGGGATGATCGGGTTAGAATTTCTCTAGA  
AACTGCAAGCGCCCTTGCTTATCTCCATTGTGCTGCTTCAATTCGAATTTTACAAAAGA  
TGTCAAATCTGCCAATATACTCTTAAATGACAATTTCACTACAAAGGTTTCCGATTTTGG  
TGCTTCAAGGTCTATTTCCATTGATGAAACCCATGTTGTCAACATTGTGCAAGGTACATT  
TGGGTACTTGGATCCCGAATACTATCACACAGGCCAGTTAACTGCAAAGAGTGATGTCTA  
TAGTTTTGGTGTAACTAGTTGAGCTCCTAACAAGGAAGAAACCAATCTTTCTCAATTG  
CTCTGGTGAAAAGCAAAATCTGTGTCATTACTTCTTCAAAGTTTACGGGATAAGACAAC  
AACTGATATGTTGGATTCTCAGGTAGTTGAGGAAGGAAACCTAGGAGAAATTGATGAGTT  
TGTATCACTTGCTGAGGCTTGCTTGAGACTTAGAGGGGAAGACAGACCGACCATGAAAGA  
AGTGGAGTCAAGATTACAGCTCCTAAGAGCCAATATTACAAAAGAAGATTCAAGATGAGTC  
ACAAAAGAACGTGGAAGCGATGCAATTGTTTCCTTCCGTTTATGACTCTACTTCTTTCAC  
TCAGAATGTTGACATCGGAATGGATGCTGATTCACTAACTCAGCTTGCTCTACATGCCA  
TACCATGGAACAAGAAGCTTGTTTCCTTGACTCGTTAA

>OsWAK9, 2768.t00022, Chromosome 1, post-processing  
ATGAAGGCCGAGCGGAATAACACTGTCCTTTTTGAAATAAAATTTGGGAGATACAATTTT  
AATGGGGTTGTTATTGGACTAGTTGTTGGTACTGGAGTTCTAGCCCTTTCATTAGTCCTA  
ACTATATTACTGCGAAGGTGGAAGCGAGGTATTCAAAAGAAAATTCGAAGGGCATACTTC  
CGAAAAAACAAAGGTCTTGTCTGGAACGACTAATATCATCAGATGAAAGTGTGGCACAT  
AGTACAAAAATATTTTCTTTGGAGGAGTTAGAAAAGAGCACCTGACCATTTTAATTCACA  
CGCATTTTGAAGGGGAGGCCATGGAATAGTTTATAAGGGTATATTATCAGATCAGCGT  
GTTGTAGCCATAAAAAGGTCTAAAATTGTAGAGCAAGGTGAGATTGATCAATTTGTCAAT  
GAAGTGGCTATCTTATCCCAAATCATTATCGCAATGTAGTTAAGCTTTTCGGTTGTTGT  
TTTGAATCCGAGGTACCTTTGCTCGTGTATGAGTTCATCTCTAATGGGACACTTTATGAC  
ATTCTACATGGCGATATGAGCACTGAATGCTCATTGAAATGGGATGATCGGGTTAGAATT  
TCTCTAGAACTGCAAGCGCCCTTGCTTATCTCCATTGTGCTGCTTCAATTCGAATTTT  
CACAAAGATGTCAAATCTGCCAATATACTCTTAAATGACAATTTCACTACAAAGGTTTCC  
GATTTTGGTGCTTCAAGGTCTATTTCCATTGATGAAACCCATGTTGTCAACATTGTGCAA  
GGTACATTTGGGTACTTGGATCCCGAATACTATCACACAGGCCAGTTAACTGCAAAGAGT  
GATGTCTATAGTTTTGGTGTAACTAGTTGAGCTCCTAACAAGGAAGAAACCAATCTTT  
CTCAATTGCTCTGGTGAAAAGCAAAATCTGTGTCATTACTTCTTCAAAGTTTACGGGAT  
AAGACAACAAGTATGTTGGATTCTCAGGTAGTTGAGGAAGGAAACCTAGGAGAAATT  
GATGAGTTTGTATCACTTGCTGAGGCTTGCTTGAGACTTAGAGGGGAAGACAGACCGACC  
ATGAAAGAAGTGGAGTCAAGATTACAGCTCCTAAGAGCCAATATTACAAAAGAAGATTCAA  
GATGAGTCACAAAAGAACGTGGAAGCGATGCAATTGTTTCCTTCCGTTTATGACTCTACT  
TCTTTCACTCAGAATGTTGACATCGGAATGGATGCTGATTCACTAACTCAGCTTGCTCT  
ACATGCCATACCATGGAACAAGAAGCTTGTTTCCTTGACTCGTTAA

>OsWAK10, 2884.t00031, Chromosome 1, pre-processing  
GTGTGGTTGGCGGGGGATTATCTGCGGTGTTGCTCTTGGATTAATAGCCACCGTCTTCT  
TCGTTTCAAGAGAAAGCACAAGAAGGTGAAGTCTGCTTCAAGCTCCTCAAGTACAGCG  
GCTCCGGCGGGACACCTCGCTCCATGGGCGGCGACATGGAGTCCGGCAGTGTCAAGGACC  
TGCAGACTCACCTCTTACAGTACGAGGAGCTCGAGGAGGCCACCGATTCTTCAACGAGA  
ACAGAGAGCTCGGTGATGGCGGCTTCCGGCACCGTCTACAAAGGTACACATACATTGTGAC  
AGACAACGGCAACACTTTTTTCATGCTTTGATGCTTACTTACAAAGTAACAATGTGTCAA  
TGTTGACGTATCAATGTAGGGATACTTCGAGACGGGCGCGTGGTGGCGGTGAAGCGGCTG

OsWAKs-Supplemental Data 1[1].txt

TACAACAACAGCTACCGGCGGGTGGAGCAGTTTCGTGAACGAGGCGGCGATCCTGTCGCGG  
CTGCGGCACCCGAACCTGGTGTATGTTCTACGGGTGCACGTCGAGCCAGAGCAGGGAGCTG  
CTCCTGGTGTACGAGTTCTGGCCAACGGCACGGTGGCCGACCACCTGCACGGCCACCGC  
GCGCAGGAGCGCGCTCTCGTGGCCGCTCCGCCTCAACATCGCCGTCGAGTCGGCCGCC  
GCGCTCACGTACCTCCACGCCATCGAGCCACCCATCGTGCACCGCGACGTCAAGACCACC  
AACATCCTCCTCGACGCCGACTTCCACGTCAAGGTCGCTGACTTTGGCCTCTCCCGCCTC  
TTCCCCCTCGACGTACGCACGTCTCCACCGCTCCCCAGGGCACCCCAGGGTAAGCAGTC  
ACGTTTCAGCGTGTACGTCCACGTGCGCTCACCGGTCCAGGCGCAGTGATATGATACGA  
TGCATCAACTAGTTTTGTCCAAGAGCTTCTCGTATTTTTACGCCTAACTAATATGCCCTTT  
TTTTCAATTTTGTCTTGTGATTTGCAGATACGTGGATCCGGAGTATACCAATGCTAC  
CAGCTTACCGACAAGAGCGATGTGTACAGCTTCGGCGTTGCTCTGGTGGAGCTCATCTCG  
TCGAAGCCGGCGGTGGACATCACCCGGCAGCGGAACGAGATCAACCTGGCCGGCATGGCC  
ATCAACAGGATCCAGAAGAGCCAGCTCGAGGAGCTCGTGGACCTCGAGCTCGGCTACGAG  
TCCGACCCGGCGACGAAGAAGATGATGACCATGGTCGCCGAGCTGGCTTTCCGGTGCCTG  
CAGCAGAACGGCGAGATGAGGCCGCCGATCAAGGAGGTGCTCGAGGGGCTCAAGGGGGTA  
CAGGACCTATGCGTGATGGAGAAAGATGGAGGCAAAGACAAGAAGGGACCTGACCCGCCA  
TTATCTCCCGACACGGTGCATGCTCAGTGGGATAGCAGGCAGACGACTCCTAACACTAGC  
CAGTGA

>OsWAK10a, gi |32987373|dbj |AK102164.1| Oryza sativa (japonica cultivar-group) cDNA  
clone: J033086H03, full insert sequence

GGCTTCGCCTGGCCGCCATGGCTCACCTACCGCTTTTGCTCCTCTCCTTCCTCCTCATCGGCGTCCA  
TGCCTCCGTTTTCCGATGGCTCGCCTCTCCACACACTTACAACACTTCCATTTGCTCCAAATCATACAAG  
TGCGGCGGCGTCAATATCTCATATCCTTTCTATCTTTCCAACGCAACCGGCGAAACCTATGATTACACTC  
AGTTTTCTTGCGGCTACACCGATTTGAATATCACTTGCAGCTGGGACGGGAGTAAGCAGACCCCTTTTAT  
CCAACCTCAACGGAGACAATACTATCCTGGAGATCATCTACGACAGTCGCACCATCGTCTCGTAGAC  
ACCGATGCGCTCCGCGGGCGGACGTGCCCCAGAGTGCGCCACAACATCACCTTCTCCAGGCCGATGAGT  
GGCTTCAGTACACCGGCCCGCGTGACAACCTCACCTTCTTCTCGGCTGCAACCTTGTAACCTACCACC  
AATGGATCCAGGGCTGACTCGTTTTGTAGACAAGAACCAATCAACTGCAAAGACTTCAGCAACTGGCCT  
GACGGTGGAGATTCATTCGTGTTACCTCCGTCGAGCTTGAGGCACCAATGGAGTACGAATTGGCCAGTC  
GCTGCCGCCAGGTCACTCGTCTGCGGTAATGGGAGTATTCTTAATTCAAGTAGCCAGAGTGCCTCCC  
AAGTGGTGAATACGGTCAAGTGCTTAAGAAGGGGTTTCAGCTGGCATGGAATCAAGGAAAGATAAACA  
TGCAACCTGTGCGAACAATCCCGGGGACAGTGTGCTTACAGCCAGAACAGGACATTCTAGGTTGCTTGT  
GCGCCGATGGGAAGGTGAGCAGCACGGATTGCACATCAAGATCGAACTTGAAGACAAAAATTATAGCAGG  
TGTGGTTGGCGGGGATTATCTGCGGTGTTGCTCTTGGATTAATAGCCACCGTCTTCTTCGTTTCGAAG  
AGAAAGCACAAGAAGGTGAACCTCGTCTTCCAAGCTCCTCAAGTACAGCGGCTCCGGCGGGACACCTCGCT  
CCATGGGCGGCGACATGGAGTCCGGCAGTGTCAAGGACCTGCAGACTCACCTCTTCAGCTACGAGGAGCT  
CGAGGAGCCACCGATTCTTCAACGAGAACAGAGAGCTCGGTGATGGCGGCTTCGGCACCGCTACAAA  
GGGATACTTCGAGACGGGCGGTGGTGGCGGTGAAGCGGCTGTACAACAACAGCTACCGGCGGGTGGAGC  
AGTTCTGTGAACGAGGCGGCGATCCTGTGCGGCTGCGGCACCCGAACCTGGTGTGTTCTACGGGTGCAC  
GTGAGCCAGAGCAGGGAGCTGCTCCTGGTGTACGAGTTCGTGGCCAACGGCACGGTGGCCGACCACCTG  
CACGGCCACCGCGCGCAGGAGCGCGCTCTCGTGGCCGCTCCGCCTCAACATCGCCGTCGAGTCGGCCG  
CCGCGCTCACGTACCTCCACGCCATCGAGCCACCCATCGTGCACCGCGACGTCAAGACCACCAACATCCT  
CCTCGACGCGGACTTCCACGTCAAGTTCGCTGACTTTGGCCTCTCCGCTCTTCCCCCTCGAGCTCACG  
CAGCTCTCCACCGCTCCCGAGGGCACCCAGGATACGTGGATCCGGAGTATACCAATGCTACGAGCTTA  
CCGACAAGAGCGATGTGTACAGCTTCGGCGTTGCTCTGGTGGAGCTCATCTCGTGAAGCCGGCGGTGGA  
CATCACCCGGCAGCGGAACGAGATCAACCTGGCCGGCATGGCCATCAACAGGATCCAGAAGAGCCAGCTC  
GAGGAGCTCGTGGACCTCGAGCTCGGCTACGAGTCCGACCCGGCGACGAAGAAGATGATGACCATGGTCG  
CCGAGCTGGCTTTCCGGTGCCTGCAGCAGAACGGCGAGATGAGGCCGCCGATCAAGGAGGTGCTCGAGGG  
GCTCAAGGGGGTACAGGACCTATGCGTGATGGAGAAAGATGGAGGCAAAGACAAGAAGGGACCTGACCCG  
CCATTATCTCCCGACACGGTGCATGCTCAGTGGGATAGCAGGCAGACGACTCCTAACACTAGCCAGTGAC  
CAGCGGGTTATTAGATTAGACCAGTATATTTGCCACCGAGGCTTAATATGTGTGTTACTGCTATTACGCT  
GAGGCGTGTGCTTGTGTATGAGAGGTGCGAGACCTTTTTTCCCCACTTTCCAGGCTTCCCTGGTGATG  
TGTGCATATGTGTTTGTGGGCTACCAGAACAGAGGGAATGTACATAAGATGTTTAGAGTGGTGTATGACC  
GATGATACATATGGATATGTACTTAGTGGATGTTACAGTTT

>OsWAK10b, gi |32985815|dbj |AK100606.1| Oryza sativa (japonica cultivar-group) cDNA  
clone: J023107H09, full insert sequence

GACCCAAACCAAAAGCAGCGCGCAGACGCAGAGCTACACAAGAAACCTTGAGCCAATAGAGCAACGAAGC  
GGCCATGTACGCCTCTGCCACCACGGCGGCGCGTGTGCTCCCCCTCCTCCTCGTCGCGCGCGCTTGC  
CTCGGCGATCCTACCGGTGACACCTACGACACCGCCATGTGCGGCGCGCAAGCTTCCATCACCTCGCGG  
GCGTCACTGTCGCGTACCGCTACCTCTCCAACGCAACGAGGCGCTCCCAAGTACGCCAAGCTGCTC  
CACGTTCTGCGGGTACCCGGGGCTGGAGATCATCTGCGACGGCGGCGGCGGCAAGGCCGTCATGATG

OsWAKs-Supplemental Data 1[1].txt

CTGGGCAACGACAGCTACACGGTGTGCGCGATTGACTACGCCAGCCTCACCGTCTCCCTCGCCGACGCCG  
ACGTGCGCAACGGCACCTGCCCGTAGTCAGCCATAACGTGACCATCCCACCGGCACCCTCGTCGCTGCA  
CCTGGCCGACACCGTCGGCATGCTCATCTTTCTTCCGCTGCGCCTTCGGGCCGGCAGCCAATGCCCA  
CCCAAGCCGCGGAGCATCCACCGCTCACCTGCGGCGAGAACTCCGAGGACGCGCCACGCACTGTTCC  
TGCTCCCGGCGAGCCCCCTGCCTCCCGGCGACCTCTGGCACCGCGGGTGTCTCGCGGTGTACGGCGTGCC  
CGTGCTCGGCGGCTCCCTCCCGTCCGACGCGAACGATCCCGCTGGAGGAAAGACGGCTACATCGCGTCG  
CTCCGCAAGGGGTTCCAGATGAGCTGGGACCGGAGCGACCGGTGCTCCCGGTGCGAGCTAACAGCGGCA  
AGTGCGGCTACAACCAGAACGGCAAGTTCTTGGGCTGCCTCTGCGCCAATGGCCTCGTGGACAGCGACGC  
CTGCAGCAAGATATCCGACTCCACCCTGCGCTTGGCCGGATCGAACTTGAAGACAAAAATTATAGCAGGT  
GTGGTTGGCGGGGATTATCTGCGGTGTTGCTCTTGGATTAATAGCCACCGTCTTCTTCGTTGCAAGA  
GAAAGCACAAGAAGGTGAAGTCTTCCAAGCTCCTCAAGTACAGCGGCTCCGGCGGGACACCTCGCTC  
CATGGGCGGCGACATGGAGTCCGGCAGTGTCAAGGACCTGCAGACTCACCTCTTCAGCTACGAGGAGCTC  
GAGGAGGCCACCGATTCTTCAACGAGAACAGAGAGCTCGGTGATGGCGGCTTCGGCACCGTCTACAAAG  
GGATACTTCGAGACGGGCGCGTGGTGGCGGTGAAGCGGTGTACAACAACAGCTACCGGCGGGTGGAGCA  
GTTCTGTGAACGAGGCGGCGATCCTGTGCGGCTGCGGCACCCGAACCTGGTGATGTTCTACGGGTGCACG  
TCGAGCCAGAGCAGGGAGCTGCTCCTGGTGTACGAGTTCGTGGCCAACGGCACGGTGGCCGACCACCTGC  
ACGGCCACCGCGCGCAGGAGCGCGCGCTCTCGTGGCGCTCCGCTCAACATCGCCGTGAGTGGCCGC  
CGCGCTCACGTACCTCCACGCCATCGAGCCACCCATCGTGACCGCGACGTCAAGACCACCAACATCCTC  
CTCGACGCCGACTTCCACGTCAAGGTGCGTGACTTTGGCCTCTCCCGCTCTTCCCCCTCGACGTACGC  
ACGTCTCCACCGCTCCCCAGGCGACCCAGGATACGTGGATCCGGAGTATACCAATGCTACCGATTAC  
CGACAAGAGCGATGTGTACAGCTTCGGCGTTGCTGTGGTGGAGTCTATCTCGTGAAGCCGGCGGTGGAC  
ATCACCCGGCAGCGGAACGAGATCAACCTGGCCGGCATGGCCATCAACAGGATCCAGAAGAGCCAGCTCG  
AGGAGCTCGTGGACCTCGAGCTCGGCTACGAGTCCGACCCGGCGACGAAGAAGATGATGACCATGGTCCG  
CGAGCTGGCTTTCCGGTGCCTGCAGCAGAACGGCGAGATGAGGCCGCCGATCAAGGAGGTGCTCGAGGGG  
CTCAAGGGGGTACAGGACCTATGCGTGATGGAGAAAGATGGAGGCAAAGACAAGAAGGGACCTGACCCGC  
CATTATCTCCGACACGGTGCATGCTCAGTGGGATAGCAGGCAGACGACTCCTAACCTAGCCAGTGACC  
AGCGGGTTATTAGATTAGACCAGTATATTTGCCACCGAGGCTTAATATGTGTGTTACTGCTATTACGCTG  
AGGCGTGTGCTTGTGTATGAGAGGTGCGAGACCTTTTTTCCCCACTTTCCAGGCTTCCCTGGTGATGT  
GTGCATATGTGTTTGTGGCTACCAGAACAGAGGGAATGTACATAAGATGTTTAGAGTGGTGATGACCG  
ATGATACATATGGATATGTACTTAGTGATGTTACAGT

>OsWAK10c, gi |32976399|dbj |AK066381.1| Oryza sativa (japonica cultivar-group) cDNA  
clone: J013063B19, full insert sequence

GTAAGCCGTTAATTTTTTCTCATCAAAACCAAGCCTAGTATAAGTACTAGTACGCTGAGTTTTCCGGGCG  
AATCATTACTTGGTTAATTAGCACATTGCCTGTGCTTGGCGATTAATCCACGCGACATTCCGATAGCCT  
CCTCCACAGTTCACACAAAAATCGCACTCATGCAGTCATGGTCTGAGTAGATCATGCCGAGAAATATCAG  
CGTGTGAACCGGACCGGAGCGTTTATTAAGTGCCTCAGTCCAGTTCGTACTCTCGCGTACCTCTCTTCGC  
TCGAGCGGAGCGCACTAAGCATTAAAGCCCTGATGGTGAATAGCACCGTTTTCTCATAAATCTCC  
TTGATTACGATCCGTAGGTCCCGGAGATTATTTGCTAGCGGTTGCTAATCCCGTTTAGCTACGACGATC  
ACGTCTGCTTCTGTACGGTGACGCGGAAAAGAAATATTAATAGGGAGTAGATTAAGTAGATGCGCAGCGA  
AGCAGTCAAGCAGCTTTACTTGTTCAGAGTTTAGGGGCCCTTTGAATCGCGGGATAAAAAACGGAGAA  
ATATAAAAAATACAGGATTTTGATAGGAATGCAAGTGAAAATAGAGTATTGCAAAACATAGGAAAAACA  
CATGAATGACCGTTTGATTGGAACACAGGAAAAACACAGAAATCATATGAGAGAGATAGACTGAGGGAAG  
TTTTCCAAGAGGTTAGAGTGGATATTAATTTTCTACGTTTTTCTCTAGAATCGTAGGAATAGGAAAGT  
TTTTCTACGTTTTTTTTCTTTTCTCATTCTACGAATCAAAAGACATGAATAGTATAGGATTTCAATTTCTTT  
GTTTTTTCTCCAATTCAAATGGGGCACATTCCGGTTCAGAATTCAGAAACCGTTGAGCTCTGTTGATTTT  
TTTCTTTATTTACAAAGAAAGTATAACTTCCAGCCCTGCACCAACTAAATATGCACATAGCTATATCTGT  
GGACACCAGAATTTTGATTGATCTTTTCTACTTATCATACTACCGCTTTTAGTTGTCTATAGTGCAGCTT  
TCTGCTGTGCCAATCACTTCTACTAGTAATCATTCCATTTTTAGTGTTGAGTGTATCTTGTGGTGTGC  
CAACGTTCCGTGATTATTAGTTTTCGGTGCTACAATACTACGTGGGCTCAACACACATAATTAGTCGAGTG  
TTAGAACAGTTTGTAGTTCACTACTCCAGTCTCTTCTGTTAAGTACAATAACGCTTCCCGGCAAGAGCTA  
ACCGACGAATAAATGGGTTTGGTGGGTGAATTGCGGTCCACTTGTGACACACAGCAAAAGTTGATGTG  
TGCTAGTCCAGTCTTGTTAATTTCCGAGGTGACATCTTATCACACACTTTCAGAACGAAAGGCACAAT  
ACCTGTAAGCCTGAATTGATTTTCTTTTTCATAAAAAACAATTAATAAAGCCTGAATTGATTGTTGTGA  
CCTGCACATTCGGGTGTTCACTTACTCATTACATGAGAACCGAAGCCACAGGAGTATCTTTTGTTTAGG  
AGTTGCAATTGACAAGTTAACTCTGCTTGCATGATGGGGCTATGCAATTACTTTGGACCAGAAAA  
AAAATCTATGGTTCAAAGTGTGTGTACGGTCTTTGGGATGCATGTTTCTGTGAGCTGATCTACTCAT  
CTTTTAACCTAACCTAAGAGAAGGCCAGGCGACTTTTAAGGCTCAAAACCTGGAAATGTTGGCAGGAACC  
ATGACTTTACACAGAAAATTGATCTTTTGTGTTGGATGCTTTTCCAATGCTATGACGTCATGGTGAAATGT  
TCCTGATCATTCTGTAAAGCGTACAATGAGTATGCCTTGTGCTTGGCTTTATGACTTCTTCTGTGTTCTTT  
TTTTTTTTTCACTTCGAACTGATCTTCAAGTGTCTTTCTGTATGTTGATATCTTACCTACAAGAAAAAC  
CAGCTACCTTTTTGCCACAACCTTTTTCCAAAGCTCTAATCTTTTTATCTAGCATGACGTGATGACCAT  
TCCTCACAAAAGAAAATAGTTTTTTTTTTTCAACAAAATAAGGGAAAAAAGATAAAAAAGAAAAGATCATG

OsWAKs-Supplemental Data 1[1].txt

GATCTTCTTCTTATGTTAGTACCAAATTTGAAATTTTCATAGTTCATAGCTGCAAACGTGTAGTCAAAAG  
GTATAAAGCCATCCCTTAAATTATGTGCAAGGTTTCCAGTCTTTGTAGGTTGCTATATAGAGTTATAGAC  
AGTCTTACCAGGAGAAAACAGCAAACATGGTCAAGTTCCCAAAAATGCCTCTTTATAATTATTATTACAT  
TATTTACATCAGCAGCAGATGCAAAACAAATAATTATTTGATCAAAAAACCAAAAGTAGGCATTACAGCTT  
GCATTTTAAATTTTATTTTCCCCAAATCTTTTTTTTTTTGTTTTTGTCTTATTATATGCAGGATCGAACTTG  
AAGACAAAAATTATAGCAGGTGTGGTTGGCGGGGGATTATCTGCGGTGTTGCTCTTGGATTAATAGCCA  
CCGTCTTCTTCTGTTTCGAAGAGAAAGCACAAGAAGGTGAACCTCGTCTTCCAAGCTCCTCAAGTACAGCGG  
CTCCGGCGGGACACCTCGCTCCATGGGCGGCGACATGGAGTCCGGCAGTGTCAAGGACCTGCAGACTCAC  
CTCTTCAGCTACGAGGAGCTCGAGGAGGCCACCGATTCTTCAACGAGAACAGAGAGCTCGGTGATGGCG  
GCTTCGGCACCGTCTACAAAGGGATACTTCGAGACGGGCGCGTGGTGGCGGTGAAGCGGCTGTACAACAA  
CAGCTACCGGCGGGTGGAGCAGTTCTGTGAACGAGGCGGCGATCCTGTGCGGGCTGCGGCACCCGAACCTG  
GTGATGTTCTACGGGTGCACGTGAGCCAGAGCAGGGAGCTGCTCCTGGTGTACGAGTTCTGTGGCCAACG  
GCACGGTGGCCGACCACCTGCACGGCCACCGCGCGCAGGAGCGCGCTCTCGTGGCCGCTCCGCCTCAA  
CATCGCGTGCAGTCGGCGCGCGCTCACGTACCTCCACGCCATCGAGCCACCCATCGTGCACCGCGAC  
GTCAAGACCACCAACATCCTCTCGACGCCGACCTCCACGTCAAGGTGCTGACTTTGGCCTCTCCCGCC  
TCTTCCCCCTCGACGTACGCACGTCTCCACCGCTCCCCAGGGCACCCAGGATACGTGGATCCGGAGTA  
TCACCAATGCTACCAGCTTACCGACAAGAGCGATGTGTACAGCTTCGGCGTTGTCTGGTGGAGCTCATC  
TCGTGCAAGCCGGCGGTGGACATCACCCGGCAGCGGAACGAGATCAACCTGGCCGGCATGGCCATCAACA  
GGATCCAGAAGAGCCAGCTCGAGGAGCTCGTGGACCTCGAGCTCGGCTACGAGTCCGACCCGGCGACGAA  
GAAGATGATGACCATGGTGCCTGAGCTGGCTTTCCGGTGCCTGCAGCAGAACGGCGAGATGAGGCGCGCG  
ATCAAGGAGGTGCTCGAGGGGCTCAAGGGGTACAGGACCTATGCGTGATGGAGAAAGATGGAGGCAAAAG  
ACAAGAAGGGACCTGACCCGCCATTATCTCCCGACACGGTGCATGCTCAGTGGGATAGCAGGCAGACGAC  
TCCTAACACTAGCCAGTGACAGCGGGTTATTAGATTAGACCAGTATATTTGCCACCGAGGCTTAATATG  
TGTGTTACTGCTATTACGCTGAGGCGTGTGCTTGTGTATGAGAGGTGCGAGACCTTTTTTCCCCCACTT  
TCCAGGCTTCCCTGGTGTATGTGTGCATATGTGTTTGTGGGCTACCAGAACAGAGGGAATGTACATAAGA  
TGTTTAGAGTGGTG

>OsWAK10d gi |32974674|dbj |AK064656.1| Oryza sativa (japonica cultivar-group)  
cDNA clone: 002-114-G02, full insert sequence

AAATTGGTGCCAGGATTAAGGCGGCGAAGTAGCAAGATATGCGCCTGCTTCGCCTGGCCGCCATGGCT  
CACCTACCGCTTTTGCTCCTCTCCTCTCCTCATCGGCGTCCATGCCTCCGTTTCCGATGGCTCGC  
CTCTCCCACACACTTACAACACTTCCATTTGCTCCAAATCATACAAGTGGCGGGCGTCAATATCTCATA  
TCTTTCTATCTTTCCAACGCAACCGGCGAAACCTATGATTACACTCAGTTTTCTTGCGGCTACACCGAT  
TTGAATATCACTTGCAGCTGGGACGGGAGTAAGCAGACCCCTTTTATCCAACCTCAACGGAGACAACATA  
CTATCCTGGAGATCATCTACGACAGTCGCACCATCGTGCTCGTAGACACCGATGCGCTCCGCGGCGGCGAG  
CTGCCCCAGAGTGCGCCACAACATCACCTTCTCCAGGCCGATGAGTGGCTTCACTACACCGGCCCCCGT  
GACAACCTCACCTTCTTCTCGGCTGCAACCTTGTACCACTACCACCAATGGATCCAGGGCTGACTCGTT  
TTGTAGACAAGAACCAATCAACTGCAAGACTTCAGCAACTGGCTGACGGTGGAGATTCATTCTGTT  
CACCTCCGTCGAGCTTGAGGACCAATGGAGTACGAATTGGCCAGTCGCTGCCGCCAGGTCACTCGTGTG  
CCGGTAAATGGGAGTATTCTTAATTCAAGTAGCCAGAGTGCCTCCCAAGTGGTGAATACGGTCAAGTGC  
TTAAGAAGGGGTTGAGCTGGCATGGAATCAAGGAAAGATAAACAATGCAACCTGTGCGAACAATCCCG  
GGGACAGTGTGCTACAGCCAGAACAGGACATTCTAGGTTGCTTGTGCGCCGATGGGAAGGTGAGCAGC  
ACGGATTGCACATCAAGTAAGTCTTTCGATGCCGATCCTTCATTTTTTCCCCTCCATTCTGTAAAGCCA  
ACAATTAGTCGATCATCTGGCATGCCGTCTCAGCATTCCAATATCTCGTTGATTGGTATAATTTGCATCT  
CGTAGTCGTTACCC

>OsWAK11, 3783.t00017, Chromosome 2, pre-processing

ATGACTGGAGTAGTACCATGGATGATCCTTGCAACCACCCTACTGCTAGCAACCATCAGC  
TTCAGTCGACGATCCAGGATGGCTAAGCCTAGATGCAGAGGAACATGCGGCAACCTCACC  
ATTCCCTACCCCTTCGGCATCGGTGCTGGTTGCTTCTACACTGATGGGTTTCGACGTTTCA  
TGCGAGGAGAACCGCACCTACATGCATAACTCAAGCAGCAACATGGAGATCTACAGCCTC  
AATCTGATTGGAGGGCAGGCTCAAGTCAGCACCTTCATCGCCGACAAGTCTCCAACAAC  
ACAGATGGCACTTCAACAGATGGTTGGGTATCAACATCTACTGCTCCTTTTTTTCATTA  
TCCAGCAGGGCTAACAAGTTAACGGTGGTTGGATGCAATACCCTTGCATTCTGGGGGGC  
TACAACGAGGAGAAGACAGAAGCTTGGGGCTGGGTGCTTCTCGATGTGCCCCGACAAGCAG  
AGTGTGGACAGTAGCGGACGTGCTCCGGCATGGGCTGTTGCCAGACATCTATTGCACCA  
AATCTCACCTCCTTAAACGTGACATTGACAGCAGGTTCAACAATTCTGAGGTGAACAGC  
TTCAACCCATGCAGTTATGCCTTCGTTGCCGAGCAAGACTGGTTTCAAGTTTGAAGCTGAT  
TACCTAGAAGGTCAACAAGTTCACAGACAAGTACAAAGGGGTTCCCACTGTGCTTGATTGG  
GTTGCTGGAAGAGAATCATGTGCCAAAGCGCCCAAGAACAGGACATCATATGCCTGTGTT  
AGCACGAACAGCAGCTGCATCAACTCACCAATGCTACCGGGTATCTCTGTGCCTGCAAC  
AATGGGTTTGCAGGCAACCCGATCTGGAAGGAGGGTGCCAAGGTAACCAACTCACTGCA  
ATTCACCTCTATTTTTCAAGTTACCTTATGTCCATCTGTGCATTGATCTTCAGTTGTTT



OsWAKs-Supplemental Data 1[1].txt

TGCTACTTTTCCATGGCGTCAACAGATATCAACGAGTGCGAATCTCCGGGTCAGTACTGC  
CATGGAATCTGCGACAACACAATTGGGGGCTACCATTGCTACTGCGGGCCTGGGACTCAA  
AGTACAGATCCAAAGAGAGAGCCCTGCAATCCAATAACAGCTTCAGAAAGAGCTAGACTA  
ACAAAAACGTTTATAGGTAATTCCCAATACTCCAAAGTCCTAATATTTTCATGAAGGAATA  
ACATATAAAAGGTAAGTGTGCACTAGACTCCTGACATTTCCCGCTTGGTAGAATTGTCTAC  
TTCATTCCCCTTAGCTAGAAGCCAGACAGATAGGCCAAAATACATATATTACAGTAAGCAT  
TCTATTGCAAAATGTTTCACTATCTGTAACCTGAGAAATATTATAGGAGAATTATC  
TCCAGCCATAGGTTCAATTATATAGCAATCTTACACAAGGATACAGTATTATAATGCTAA  
TTCAGCAATAAAATACCCACAGAAAATTTCTCTCGACTTCTGGTAACATAAAAAAGGTTT  
TTCTTTCACAGGCATTTTCGGTATGCGCTATTATACTGCTTAGTTGCACTTTTGCCTACTG  
ATCGAATGCCAGAAAAGAAAGCTGATGAAAGAAAAGAAAGGTTCTTTCAACAAAATGGG  
GGTATGCTGCTGTATGAGCAAATCCGGTCAAAGCAAGTTGATACTGTGAGAATATTCACA  
AAAGAAGAAGTGAAGAATGCAACAGACAATTTTGAAGCAAGAAAGTGAAGAGAGGC  
GGTCAATGGCACTGTATACAAGGGGATCCTCAAAGACAACAGAATAGTAGCCATAAAGCGC  
TCAAAGATTATGAATATGGTTTCAGAAAAGATGAATTTGTGCAAGAGATGATTATACTTTCA  
CAGATCAACCACAGGAATGTGGTAAGGCTTCTAGGTTGTTGCTTAGAAGTGGAAGTTCCA  
ATGCTGGTCTATGAATTCATCCCAAATGGCACTTTGTTGAGCATATACATGGTAAATAC  
AGAACAACCTCCATTTCACTGGATGCTCGTCTACGGATTGCTCAGGAATCTGCAGAAGCA  
CTAGCATATCTACATTCATCAGCATCCCCTCCAATAGTTTCATGGTGTATGCAAAATCTCCC  
AACATTCCTAGGTGACAATACATAACAAAAGTGAAGTGAAGTTCGAGCATCAAGGATG  
CTTCCAAAAGATGAAATACAGTTTATGACAATGGTACAGGGGACTCTAGGCTACCTAGAC  
CCAGAATACTTACAAGAGCGCCAGCTAACACAGAAAAGTGAAGTGTATAGCTTTGGAGTT  
GTGCTTCTAGAACTAATAACAGGAAAGACTGCAATTTATTCTGAAAATACTGAAGAAAAG  
AAAAGCCTTGCATCATCCTTCTTCTGGCACTGAAAGAGAACAGACTTGAGTCCATCTTG  
GACAGGAACATATTAGGTGTTGGAACAGAGCTGTTCCAAGATGTTGCTCAACTGGCAAAA  
TGCTGCTTGAAGTACAAAGGGGGAAGAACGGCCATTAAAGACAGAAGTGAAGGTTA  
AAAGCAATAAGAAGCACCTGGCGTGAGCAATTGATTGAGGGTGCTAATGAAGAAAGTGA  
TGTTTGCTTGAAGTTCATCAGATATGACCCTTCTACCACTGGACGACACGGAAGCTTG  
ATGGCGCTAGATATAGAACTGGTAGATGA

>OsWAK11, 3783. t00017, Chromosome 2, post-processing  
ATGACTGGAGTAGTACCATGGATGATCCTTGCAACCACCCTACTGCTAGCAACCATCAGC  
TTCAGTGCAGCATCCAGGATGGCTAAGCCTAGATGCAGAGGAACATGCGGCAACCTCACC  
ATTCCTACCCCTTCGGCATCGGTGCTGGTTGCTTCTACACTGATGGGTTGACGTTTCA  
TGCGAGGAGAACCGCACCTACATGCATAACTCAAGCAGCAACATGGAGATCTACAGCCTC  
AATCTGATTGGAGGGCAGGCTCAAGTCAAGCAGCCTTCATCGCCGACAAGTGCTCCAACAAC  
ACAGATGGCACTTCAACAGATGGTTGGGTATCAACATCTACTGCTCCTTTTTTTCACATTA  
TCCAGCAGGGCTAACAAGTTAACGGTGGTTGGATGCAATACCCTTGCACTTCTGGGGGGC  
TACAACGAGGAAGAACAACGTTGGGGCTGGGTGCTTCTCGATGTGCCCCGACAAGCAG  
AGTGTGGACAGTAGCGGCCAGTGCTCCGGCATGGGCTGTTGCCAGACATCTATTGCACCA  
AATCTCACCTCCTTAAACGTGACATTCGACAGCAGGTTCAACAATTCTGAGGTGAACAGC  
TTCAACCCATGCAGTTATGCCTTCGTTGCCGAGCAAGACTGGTTCAAGGTTTGAGCCTGAT  
TACCTAGAAGGTCACAAGTTCACAGACAAGTACAAAGGGGTTCCCACTGTGCTTGATTGG  
GTTGCTGGAAGAGAATCATGTGCCAAGCGCCCAAGAACAGGACATCATATGCCTGTGTT  
AGCAGCAACAGCAGCTGCATCAACTCACCAATGCTACCGGGTATCTCTGTGCCTGCAAC  
AATGGGTTTGCAGGCAACCCGTACCTGGAAGGAGGGTGCCAAGATATCAACGAGTGCGAA  
TCTCCGGGTCACTACTGCCATGGAATCTGCGACAACACAATTGGGGGCTACCATTGCTAC  
TGCGGGCCTGGGACTCAAAGTACAGATCCAAAGAGAGAGCCCTGCAATCCAATAACAGCT  
TCAGAAAGAGCTAGACTAACAAAAACGTTTATAGGCATTTCCGGTATGCGCTATTATACTG  
CTTAGTTGCACTTTTGCCTACTGATGCAATGCCAGAAAAGAAAGCTGATGAAAGAAAAA  
GAAAGGTTCTTTCAACAAAATGGGGGTATGCTGCTGTATGAGCAAATCCGGTCAAAGCAA  
GTTGATACTGTGAGAATATTCACAAAAGAAGAACTAGAGAATGCAACAGACAATTTTGAC  
TCAAGCAAAGAAGTGAAGAGGGCGGTATGGCACTGTATACAAGGGGATCCTCAAAGAC  
AACAGAATAGTAGCCATAAAGCGCTCAAAGATTATGAATATGGTTTCAGAAAGATGAATTT  
GTGCAAGAGATGATTACTTTTACAGATCAACCACAGGAATGTGGTAAGGCTTCTAGGT  
TGTTGCTTGAAGTGAAGTTCCAATGCTGGTCTATGAATTCATCCCAAATGGCACTTTG  
TTCGAGCATATACATGGTAAATACAGAACACCTCCATTTCACTGGATGCTCGTCTACGG  
ATTGCTCAGGAATCTGCAGAAGCACTAGCATATCTACATTCATCAGCATCCCCTCCAATA  
GTTTCATGGTGTATGCAATCTCCCAACATTCTCCTAGGTGACAACATACATAACAAAAGTG  
ACTGACTTTGGAGCATCAAGGATGCTTCCAAAAGATGAAATACAGTTTATGACAATGGTA  
CAGGGGACTTAGGCTACCTAGACCCAGAATACTTACAAGAGCGCCAGCTAACACAGAAA  
AGTGATGTTTATAGTTTGGAGTTGTGCTTCTAGAACTAATAACAGGAAAGACTGCAATT  
TATTCTGAAAATACTGAAGAAAAGAAAAGCCTTGCATCATCCTTCTTCTGGCACTGAAA

OsWAKs-Supplemental Data 1[1].txt

GAGAACAGACTTGAGTCCATCTTGGACAGGAACATATTAGGTGTTGGAACAGAGCTGTTC  
CAAGATGTTGCTCAACTGGCAAAATGCTGCTTGAGTACAAAGGGGGAAGAACGGCCATTA  
ATGACAGAAGTAGCTGAAAGGTTAAAGCAATAAGAAGCACCTGGCGTGAGCAATTGATT  
GAGGGTGCTAATGAAGAACTGTATGTTTGCTTGAAAATTCATCACAGTATGACCCTTCT  
ACCACTGGACGACACGGAAGCTTGATGGCGCTAGATATAGAACTGGTAGATGA

>OsWAK12, 4362.t00002, Chromosome 2, pre-processing  
ATGCAGCCGAGCGAGACGTGCCTGCGGCGGTGCGGCGACGTGGAGATCCCGTACCCGTTT  
GGCGTCGGCAGCGGGTGCCACCTCGAGACCGGGGACTGGACGTTCTGTGCTGAGCTGCAAC  
CGCAGCGCGGACGGGCGGCTGCGGGTGTAACACTACGAGATCGAGGTGGTGGACGTGTCTG  
GTGCGGCGGGGGCAGCTGCGCATCTACAGCGCCATCAACCCGTGGTGCTACAACGGCAGC  
ACGTCCGCCATGAACGGGCAGAGCAACTGGTGGTACGACATGTCCATCACCAACTTCCGC  
ATCAACGACGCGCTCAACCGCTTCACCGTCGTGCGGTGCAACTCCCTCGCCTACATCCTC  
TCGCCCCAACGGCACC GGCGGTGCCGACCGGTACATGACCGGGTGATGGCCATGTGCCCC  
GGCGCGGGCCGGCTGGAGAAGGAGAACGGCTCCTGCGCCGGCGTGGGGTGCTGCCAGACG  
GCCATCCCGGCCGGCCTCAACGGGTACCAGGTCTCCTTCGAGGAGAAGTTCAACACGTCTG  
GCGATCGCCGGGTTTACGCCGTGCAGCTACGCCGTGCTGGTCAAGCCTCGGCGTTTCGAC  
TTCCGCGCCTCGTACGTACCACCGACGAGTTTCATGGCGTCCAACGGCGGCCAGCTGCCG  
CTGGTGCTCGACTGGGCCATCGGGAACAAGACGTGCGAGGAGGCCAAGCGGAACGCGTCTG  
GCCTACGCCCTGCGTCAGCGCCAACAGCGAGTGCCTCGACTCCAGGTACGGCCGTGGCCGC  
GGCTACCTCTGCAACTGCTCCGCCGGCTACGACGGCAACCCCTACCTCCTCGACGGCTGC  
CAAGGTGAGCTCCACATAGGCCGCGCGTTGCTCCGGTGTCGAATGCCGTTACGCCCATG  
AACCATTTTTGGTTTCTTGCTCTGCAGATATCAACGAATGCGACGAGAGCAGGTTACAGT  
ACCCGTGCTCCGTTTCTGGCACATGTGTCAACACTCCCGGAGGATTACCTGCACTTGCC  
CTGACAAGACGATAGGCAACGCTTACAACGGCACATGCGGGGATAACAAGTCCCAGCTCG  
GATGGAAGATCGCCATTGGTAATCCACGCATACGCATCTCCAATGTTCTTGTAAGAACG  
CCTAAATTAACAAAACTGAGTTACTGCAGGAATCAGCAGCGGAGTTGTAATACTGATAA  
TCACCGCGCTCGTGCCTGTACATGATCCACGGAAGAGGAGGCTGGCCAAGATCAAGAGGG  
AGCACTTCAGGCAGCACGGTGGGCTGCTGCTGTTTCGAGGAGATGAAGTCGAGGCAGGGCC  
TGTCGTTTCGCGCTCTTACCCAGGAGGAGCTGGAGCAGGCGACGAACCGGTTTCGACGAGC  
GCAACGTGATCGGCAAGGGCGGGAACGGCACGGTGTACAGGGGCACCATCGCCAAGGACA  
ACGGCGCGGTGGTGGCCATCAAGCGGTGCCGGTGGCCACCGAGCGGCAGAAGAAGGAGT  
TCGGCAAGGAGATGCTGATCTGTCCAGATCAACCACCGCAACATCGTCAAGCTCTACG  
GCTGCTGCCTCGAGGTGGAGGTCCCCATGCTGGTGTACAAGTACATCCCCAACGGCACCC  
TGTACAGGCTCATCCACGGCGGCGAGGGCGGCGCTGCGCGCGGCGCATCCCGTTTCGCGG  
CGCGTGTGAGGATCGCGCACCAAGGCCGCGGAGGCGCTGGCGTATCTGCACTCGTGGGCGT  
CGCCGCCCATCATCCACGGCGACGTCAAGACGTCCAACATACTGCTCGACGAGGACTACG  
CGGCAAGGTGTCCGACTTCGGGGCTCGACGCTGGCGCGGCGGACGCGGCGCAGTTTCG  
TCACGTTTCGTGACGGCACCTGCGGGTACCTCGACCCGGAGTACATGCGGACGTGCAGGC  
TCACCGACAAGAGCGACGTGTACAGCTTCGGCGTCTGCTGCTGGAGCTCCTCACCTGCC  
GGAAGGCGCTCAACCTGGAGGAGCTGGAGGAGGAGAAGTACCTCTCGTCGCAGTTCTCC  
TGGCCGTGCGAGAGGGCCGGCTCGGCGAGATCCTGGACCCGAGATCAAGGGCGAGCAGA  
GCATGGAGGTGCTCGAGCAGGTGCGCGAGCTGGCGAAGCAGTGCCTGGAGATCTCCGGCG  
AGAAGAGGCGGTGATGCGGAGGTGCGGAGGAGCTCGACAGGCTGGGGAAGCTGTGCG  
TGCACCCATGGGGGCGCCAACTCCGGCGAGCTAGCGGCATTGCTCGGTGGATACCCGA  
GCATGGCTGCTGACTCTGATCAGATTGAACCTAGCACTAGCACTAGAAACATTAGTTTCA  
GTGATACGGCGTATATTGGGATCCGATCTCCACGCTGA

>OsWAK12, 4362.t00002, Chromosome 2, post-processing  
ATGCAGCCGAGCGAGACGTGCCTGCGGCGGTGCGGCGACGTGGAGATCCCGTACCCGTTT  
GGCGTCGGCAGCGGGTGCCACCTCGAGACCGGGGACTGGACGTTCTGTGCTGAGCTGCAAC  
CGCAGCGCGGACGGGCGGCTGCGGGTGTAACACTACGAGATCGAGGTGGTGGACGTGTCTG  
GTGCGGCGGGGGCAGCTGCGCATCTACAGCGCCATCAACCCGTGGTGCTACAACGGCAGC  
ACGTCCGCCATGAACGGGCAGAGCAACTGGTGGTACGACATGTCCATCACCAACTTCCGC  
ATCAACGACGCGCTCAACCGCTTCACCGTCGTGCGGTGCAACTCCCTCGCCTACATCCTC  
TCGCCCCAACGGCACC GGCGGTGCCGACCGGTACATGACCGGGTGATGGCCATGTGCCCC  
GGCGCGGGCCGGCTGGAGAAGGAGAACGGCTCCTGCGCCGGCGTGGGGTGCTGCCAGACG  
GCCATCCCGGCCGGCCTCAACGGGTACCAGGTCTCCTTCGAGGAGAAGTTCAACACGTCTG  
GCGATCGCCGGGTTTACGCCGTGCAGCTACGCCGTGCTGGTCAAGCCTCGGCGTTTCGAC  
TTCCGCGCCTCGTACGTACCACCGACGAGTTTCATGGCGTCCAACGGCGGCCAGCTGCCG  
CTGGTGCTCGACTGGGCCATCGGGAACAAGACGTGCGAGGAGGCCAAGCGGAACGCGTCTG  
GCCTACGCTGCGTCAGCGCCAACAGCGAGTGCCTCGACTCCAGGTACGGCCGTGGCCGC  
GGCTACCTCTGCAACTGCTCCGCCGGCTACGACGGCAACCCCTACCTCCTCGACGGCTGC

OsWAKs-Supplemental Data 1[1].txt

CAAGATATCAACGAATGCGACGAGAGCAGGTTACAGGTACCCGTGCTCCGTTCTGGCACA  
TGTGTCAACACTCCCGGAGGATTACCTGCACTTGCCTGACAAGACGATAGGCAACGCT  
TACAACGGCACATGCGGGGATAACAAGTCCAGCTCGGATGGAAGATCGCCATTGGAATC  
AGCAGCGGAGTTGTAATACTGATAATCACCGCGTCGTGCGTGTACATGATCCACGCGAAG  
AGGAGGCTGGCCAAGATCAAGAGGGAGCACTTCAGGCAGCACGGTGGGCTGCTGCTGTTT  
GAGGAGATGAAGTCGAGGCAGGGCCTGTCGTTTCGCGCTCTTCACCCAGGAGGAGCTGGAG  
CAGGCGACGAACCGGTTTCGACGAGCGCAACGTGATCGGCAAGGGCGGGAACGGCACGGTG  
TACAGGGGACCATCGCCAAGGACAACGGCGCGCTGGTCGCCATCAAGCGGTGCCGGCTG  
GCCACCGAGCGGCAGAAGAAGGAGTTTCGGAAGGAGATGCTGATCCTGTCCCAGATCAAC  
CACCGCAACATCGTCAAGCTCTACGGCTGCTGCCTCGAGGTGGAGGTCCCCATGCTGGTG  
TACAAGTACATCCCCAACGGCACCTGTACAGGCTCATCCACGGCGGCGAGGGCGGCGCG  
TCGGCGCGGCGCATCCCGTTTCGCGGCGCGTGTGAGGATCGCGCACCCAGGCCGCGAGGCG  
CTGGCGTATCTGCACTCGTGGGCGTCGCGGCCCATCATCCACGGCGACGTCAAGACGTCC  
AACATACTGCTCGACGAGGACTACGCGGCGAAGGTGTCCGACTTCGGGGCGTCGACGCTG  
GCGCCGGCGGACGCGGCGCAGTTTCGTACGTTTCGTGCAGGGCACCTGCGGGTACCTCGAC  
CCGGAGTACATGCGGACGTGCAGGCTCACCGACAAGAGCGACGTGTACAGCTTCGGCGTC  
GTGCTGCTGGAGCTCCTCACCTGCCGAAGGCGCTCAACCTGGAGGAGCTGGAGGAGGAG  
AAGTACCTCTCGTCGAGTTCTCTCTGGCCGTTCGAGAGGGGCCGGCTCGGCGAGATCCTG  
GACCCGCGAGATCAAGGGCGAGCAGAGCATGGAGGTGCTCGAGCAGGTGCGCGAGCTGGCG  
AAGCAGTGCCTGGAGATCTCCGGCGAGAAGAGGCCGTGATGCGGGAGGTGCGGGAGGAG  
CTCGACAGGCTGGGGAAGCTGTGCTGCACCCATGGGGGACGCCAAGTCCGGCGAGCTA  
GCGGCATTGCTCGGTGGATCACCGAGCATGGCTGCTGACTCTGATCAGATTGAAGTTAGC  
ACTAGCACTAGAAACATTAGTTTTAGTGATACGGCGTATATTGGGATCCGATCTCCACGC  
TGA

>OsWAK13, 4362. t00004, pre-processing

ATGCTTCTTCCGTTGATGGCCGTGCTGATCGCCTCGGCATGGCCGGCGGCAGCATCGACG  
ACGACGGCTGCTGCACAGCCAGCCGCGCGCTGCCAGCGCCGGTGGCGGACGTGGACATC  
CCCTACCCGTTTCGGCATCGGCCGCGGCTGCTACCTCTACACCGCGGAGGGCGACGTACCC  
TTCCGGGCTCACCTGCAACCCGACCCGCCGACGGCAGCTACCGCCCTTCTGCTGGGAGTAC  
GAGGTCTGGACGTCTCCCTCCGCCGCGGGCAGGCGCGCGTCCGCAACGACATCAACCGG  
TGGTGTCTACAACGCCACGACCCGGTTCGATGGACGCGGAGAGCACGTGGTGGTGGGACGTC  
TCCGACTCGTGGTTCATGTCTCCGACGAGGGCAACCCGCTCGTCGTGTCGGGTGCAAC  
TCGCTCGCGTACGTGACGTGGTGAACGAGACGGAGTACATGACCGGGTGCATGGCCACC  
TGCCCCAGCGTGGGGCGGCTGGAGAACGGGTCTGCTCCGGCATGGGCTGCTGCGAGGCG  
GCCATCCCGAGGGGGATCAACTCCTACGTCTGGGGTTCGAGGAGAAGTTCAACACCACC  
TCCGGCGCGCTCGGCCGTTGACGTACGCCGTGGTGGTTCGAGGCCGCTCCTTCGAGTTC  
AGGACGAGCATGCTCACCACCGGCACTTCGTGGAGTCCACCGCGGCAAGGTGCCCTG  
GTGCTCGACTGGGTGGTTCGGCAAGAAGACGTGCCGGGAGGCGAGGCGGAACGCCACGGG  
TACATGTGCGTCAGCCGCGACAGCGAGTGCCTGATTTCGAGGAACGGCCCGGGCTACCTC  
TGCAACTGCTCCGCCGGCTTTGAAGGAAACCTTACCTCCTCGACGGATGCCAAGGTAAA  
CTACTCGTATATAATTCTGTTTCAGAACTTCAGATAAAGATTGTGATTTGTTTGGTTTT  
CTGAAGAAGATACTAGTAGTGAAGAAACAGAGTAATTTGCTTTCTGCAGACATTAACGA  
GTGTGAGGACAGCAGATTCAAGTACCCGTGCTCTGTTCTGGTACCTGCATTAACACTCC  
AGGTGGATTTCAGATGTTCTTGTCTGATAAAACAACGGGCAACGCTTATTTTGGCACATG  
CGAGGCCAAGAAATCTCAGCTCGGAGTTTCACATCGCAATTGGTACGCCATACGCTCTCTA  
GTACATTTTGAATTGTAATTATCTACCGATCATGTATGTGTAGAGTCCGTAATTTCTT  
TGTAACCAACCCCCCTTTACTGCAGGTGTTAGCATTGGCATAGCTCTACTAGTAATCATC  
ATGTCTTCTGCTTACATGATCCAGCAAAAGAGGAGGCTTGCCACTGTAAAAAGGAGGTAC  
TTTAACACGATGGTGGTCTGTTGCTATTTCGAAGAAATGAAGTCAAATCAGGGACTATCC  
TTCACAGTGTATACCAAGGACGAGCTAGAAGAAGCAACAAACAAATTTGATGAGCGAAAT  
GTGCTCGGGAAGGGAGGCAATGGCACTGTCTACAGGGTACTCTGAAAGACGGTAGAGTG  
GTTGCGATCAAGAGGTGCAAGCTAATCAACGAGAGGCAGAAGAAGGAGTTTCGGCAAGGAA  
ATGCTCATTCTGTCCAGATCAACCACAGGAACATCGTCAAGCTCCATGGATGCTGCCTA  
GAGGTGGAGGTCCCCATGCTTGTCTACGAGTTTCATCCGAATGGCACCTTGTACCAACTT  
ATCCATCGGGCGGACACGGTTCGCGCATTTCTTCGCGGCGCGTCTGAAGATCGCGCAC  
GAGGCAGCCGAAGCGCTTGCTTACCTGCACTCGTGGGCTTCACCCCAATCATCCATGGA  
GACGTGAAATCGCCCAACATGCTCATCGACGAGAACTACACAGTGAAGGTTTCAGACTTT  
GGTGTTCACGCTGGCTCCGACAGATGAAGCTCAGTTTCGTACACTTGTTCAGGGGACC  
TGCGGTTACCTCGATCCAGAGTACATGCAGACATGCAAACTGACGGATAAGAGTGATGTG  
TACAGCTTCGGCGTCTTACTAGAGTGTACGTGTGCGAAAGGCACTGAACCTTCAG  
GCCCTCGAGGAGGAGAAGAACTCTCGTCACATTTCTTCAGTCTAAGTGAGAACAGG  
CTCGAGGGGATACTGGACTCACAGATACAAAGCGAACAGAGCATTGAAGTATTGAACAA

OsWAKs-Supplemental Data 1[1].txt

ATGGCAGATCTAGCGAAGCAGTGCCTGGATATGTCCAGTGAGAAGAGACCCTCGATGCGT  
CAGGTTGCAGAGGAGCTTGACAGGCTAAGGAAGCTAGCAGAGCATCCTTGGGGACGGCAT  
GAAAGTGAGGAGCTGGAGAAATTGCTTGTAGAGGATCGCAAGCAGTTCTCTGAAATA  
GAACTTAGCAATGGGTATGTCAGCTTGACTGACTCAGCGTATTTAGGAATCCAATCTCCA  
CGGTGA

>OsWAK13, 4362. t00004, post-processing

ATGCTTCTTCCGTTGATGGCCGTGCTGATCGCCTCGGCATGGCCGGCGGCAGCATCGACG  
ACGACGGCTGCTGCACAGCCAGCCGCCGCGTGCCAGCGCCGGTGCGGCGACGTGGACATC  
CCCTACCCGTTCCGGCATCGGCCGCGGCTGCTACCTCTACACCGGCGAGGGCGACGTCACC  
TTCGGGCTCACCTGCAACCGCACCGCCGACGGCAGCTACCGCCCTTCTGCTGGGAGTAC  
GAGGTCTGACGTCTCCCTCCGCCGCGGGCAGGCGCGCGTCCGCAACGACATCAACCGG  
TGGTGCTACAACGCCACGACCCGGTTCGATGGACGCGGAGAGCACGTGGTGGTGGGACGTC  
TCCGACTCGTGGTTCCATGTCTCCGACGAGGGCAACCGCCTCGTCTGTCGCGGTGCAAC  
TCCGCTCGCGTACGTGACGTGCGTGAACGAGACGAGTACATGACCGGGTGCATGGCCACC  
TGCCCCAGCGTGGGGCGGCTGGAGAACGGGTCTGCTCCGGCATGGGCTGCTGCGAGGCG  
GCCATCCCGAGGGGGATCAACTCCTACGTCTGGGGTTTCGAGGAGAAGTTCAACACCACC  
TCCGGCGCCGTCGCGCCGGTGCAGCTACGCCGTGGTGGTTCGAGGCCGCCTCCTTCGAGTTC  
AGGACGACGTACGTACCAACCGGCGACTTCGTGGAGTCCACCGGCGGCAAGGTGCCCTG  
GTGCTCGACTGGTGGTGGTCGGCAAGAAGACGTGCCGGGAGGCGAGGCGGAACGCCACGGGC  
TACATGTGCGTCAAGCCGCGACAGCGAGTGCCTCGATTTCGAGGAACGGCCCGGGCTACCTC  
TGCAACTGCTCCGCCGGCTTTGAAGGAAACCTTACCTCCTCGACGGATGCCAAGACATT  
AACGAGTGTGAGGACAGCAGATTCAAGTACCCGTGCTCTGTTCTGGTACCTGCATTAAC  
ACTCCAGGTGGATTTCAGATGTTCTTGTCTGATAAAACAACGGGCAACGCTTATTTTGGC  
ACATGCGAGGCCAAGAAATCTCAGCTCGGAGTTCACATCGCAATTGGTGTAGCATTGGC  
ATAGCTCTACTAGTAATCATCATGTCTTCTGCTTACATGATCCAGCAAAAGAGGAGGCTT  
GCCACTGTAAAAAGGAGGTACTTTAACCAGCATGGTGGTCTGTTGCTATTTCGAAGAAATG  
AAGTCAAATCAGGGACTATCCTTACAGTGTTTACCAAGGACGAGCTAGAAGAAGCAACA  
AACAAATTTGATGAGCGAAATGTGCTCGGGAAGGGAGGCAATGGCACTGTCTACAGGGGT  
ACTCTGAAAGACGGTAGAGTGGTTGCGATCAAGAGGTGCAAGCTAATCAACGAGAGGCAG  
AAGAAGGAGTTCGGCAAGGAAATGCTCATTCTGTCCCAGATCAACCACAGGAACATCGTC  
AAGTCCATGGATGCTGCCTAGAGGTGGAGGTCCCCATGCTTGTCTACGAGTTTCATCCCG  
AATGGCACCTTGTACCAACTTATCCATGGCGGGCGACACGGGTGCGCGATTTCTTTCGCG  
GCGCGTCTGAAGATCGCGCACGAGGCGAGCCGAAGCGCTTGCTTACCTGCACTCGTGGGCT  
TCACCCCCAATCATCCATGGAGACGTGAAATCGCCCAACATGCTCATCGACGAGAACTAC  
ACAGTGAAGGTTTCAGACTTTGGTGCTTCCACGCTGGCTCCGACAGATGAAGCTCAGTTC  
GTCACACTTGTTCAGGGGACCTGCGGTTACCTCGATCCAGAGTACATGCAGACATGCAAA  
CTGACGGATAAGAGTATGTGTACAGCTTCGGCGTCTGTTCTACTAGAGCTGCTCAGGTGT  
CGAAGGGCACTGAACCTTCAGGCCCTCGAGGAGGAGAAGAATCTCTCGTCACATTTCTT  
CTAGCTCTAAGTGAGAACAGGCTCGAGGGGATACTGGACTCACAGATACAAAGCGAACAG  
AGCATTGAAGTATTGAACAAATGGCAGATCTAGCGAAGCAGTGCCTGGATATGTCCAGT  
GAGAAGAGACCCTCGATGCGTCAGGTTGACAGGAGCTTGACAGGCTAAGGAAGCTAGCA  
GAGCATCCTTGGGGACGGCATGAAAGTGAGGAGCTGGAGAAATTGCTTGTAGAGGATCG  
CCAAGCACGTTCTCTGAAATAGAATTGCAATGGGTATGTCAGCTTGACTGACTCAGCG  
TATTTAGGAATCCAATCTCCACGGTGA

>OsWAK14, 2541. t00004, Chromosome 2, pre-processing

ATGAGCTCGAGCTTATTAGTGGCAGCTTGCGCCGTCTCTTTTGCTGCTGTGCTCGGCT  
GCTACGTCCCCAGCATCGGCTGCAGTCTACGGAGTTGGCGGAGGGCTCTTGTCTATCCCT  
TCTAATGATTCCCTGGCTCATTGCCCTCTCGTTGCGGAGATGTTGGCATCGACTACCCC  
TTCGGGATAGCGCCGGGCTGTTTCCGGGAAGGCTTCGAGCTCATCTGCCGCAACACCGCC  
AAAACCTCCTAAGCTCTTTCTGGGTGATGGTACTACTGAGATCACAGACTTGGGTTATAGG  
TATGTTTTGGCCAGATATACTTCAACATTACGGTGAGACCAGGTACGGATACCTACAAC  
ATATCCTGGGTGGCCCCAACAGAGGGTATTACTATTGATCATTACAACACATTTTACGTT  
ATCGGTTGTAATTTGATGCTACCTTGTTCGAGTATGGCACGGAGGACCTCATAGGTTCT  
TGCATGAGTAGATGTGATGGTGAAAAGGCACCAATAGGAGGGCCTTGTAAATGGGATGGGA  
TGCTGTTTCATCGAGTTACCAAGGGTCTTGCGGGGCTTTCAGTCAACCATAATTCTTCGG  
TCGGATGGCATTCTGTAGCACAAACAGATCCAGTGCACCCTGGAATCATGGCTTTCATG  
TCATCGGACTATTATATATCAACACAAGTGACCTTTTCTTAGGTTGGACAAACACAAGT  
AATGTTGAAGGCACAGTACTTTCTTTTGTACCATAGATCAACCAAGCTGTGAACGCGCG  
CGCATGAACAACACAAGTTATGCGTGTAGCCCTGGCAGCAATTGCCGGAATGTGTCTCT  
GGAGGTTATCATTTACTGTCTGTTTATGAACAGGGGAATCCTTACCTTCTAGATGGA  
TGCACGGGTACGTACTTCTGCCTGCCCCCTTTTACCCCCAAAACGAAGCAAAATATAA

OsWAKs-Supplemental Data 1[1].txt

TGCACTGTCACTAACCTCCTTCTTATTCTTATTATATATTGTAATTTCTATGGTGGAAACA  
GATTACAACCCCAATATAAAGAACACTGTTCAACATCCTGTGGAGACATGAAGATTCCCT  
TTCCCTTTTGGAGTCGAAGAAGGTTGTTTTGCTAACGAAAGGTTTAGACTTAATTGTACA  
GAAGGTAACCTAACTGTTTGCGAATTAGGAGAAGCACAATATCATGTGACTGCTGTGTCT  
TTGGATGATGGGACTCTAACTGTCGGAACATGATGAATGACACAACTACGAGAAAGAG  
GCGATAATTGTTTCAGACCACAGATACTGGCCGTGATTATTCATTCTCAGGCCCTGTGGAA  
GATAGATTTGATCTCTCTATGGAATACGCCATTGTTATAAGATGGGCAGTTACCAACTTA  
ACTTGTGAAGTAGCTGTGCAGAAGAACACTACATACGCATGCCGCAGTAGCCACAGCTAC  
TGCCTGAACGTCACCCACAGGAAAGAGTTCATGGGATATCGTTGCAAGTGTCTCCCGGT  
TTTGAAGGAAACCCATACATCGAGGATGGCTGCACAGGTTATTTCTCTTCACACCTCCT  
CCAGTGTGCACCAGCAATGCTCATGCCTGCAATGTTTAGAAATTGAATTATATCAATTT  
AACTTTGGGAGAATCGACAACTAATCATAGTTTTTTGCAGACATCAATGAATGCTTACTG  
CCAACTATTGCAATGGCACGTGTCAAAATTTACTTGGAAATTATACATGCACAAGCTGC  
CCGCATAGAAAAGAGTTTGATCCAATCAAAAAGAAGTGTGTTACATCAGCAAAGCAACGC  
AATCTTCTTTTAGGTAAGACCGTAAGAAGTAATAGCCAACATGCAAAATGATTTTATTAT  
GACAAAATGAATTGATGCAGGTATTGCAATTGGAATTGGTTGTGGTCTTGGCTCCATAGT  
TATCGTGTGGGGCAATGATACTTGCCAATAAGTGGAGGAAAGGCATCCAAAAGAGAAT  
ACGGAGAGCATATTTCAAGAAAAATCAAGGCCTACTCTTGGAGCAACTAATCTCAAATGA  
AAGCGCCACAAACAAAACGAAGATATTTTCTTGGGAAGAACTAGAGGAGGCAACCAACAA  
CTTTGATGGAACCTCGTGTCTTGGACGTGGAGGACATGGCACAGTTTACAAAGGCATTCT  
ATCTGACCAGCGTGTGGTGGCCATTAAAAAATCAAAAATCGTTGAGCAAACTGAGATAGA  
TCAATTTATCAACGAGGTTGTTATCTTATCTCAAATTATCCACCGCAATGTGGTAAAGAT  
TTTTGGTTGTTGTCTTGAATCTGAGGTGCCACTGCTGGTTTATGAATTCATATCGAATGG  
CACACTGCATGACCACCTTCATACCGATCTTAGTGTTAGATGCTCGCTGTCATGGGATGA  
TCGCAATTAGGATTGCTGTAGAAGCAGCAGGGGCACTTTCTATCTGCATTACAGCTGCTGC  
AATAACCAATTTTTCATAGAGACGTGAAATCTTCCAATATTCTCTTAGATGGCAGCTTTAC  
TACAAAGGTCTCTGATTTTGGTGCTTCAAGATCTGTTTCACTTGATGAAACTCATGTGGT  
GACTATTGTCCAAGGCACATTCGGTTATCTAGACCCAGAGTATTATCATACTGGACAACT  
AACTGAAAAAAGTGATGTATATAGTTTTGGAGTGATACTTGTGGAACCTTCTAATAAGAAA  
GAAACCAATTTTCATTAATGAGGCAGGTGCAAAACAAAGCTTGCTCATTACTTTCGTTGA  
AGGACTTCAAGAGGGCTCTCTAATGGAAATAATAGATCCTCAGGTTGTTGAAGAGGCAAA  
CAAGGAAGAGATCGATGGAATTGCCTCGCTTACAATGGCATGCTTGAAAGTTAAAGGAGT  
AGATAGACCTACTATGAAAGAAGTAGAGATGAGGCTGCAGTTCCTGAAAACCTAAGAGGCT  
AAGAAAATTCAACTGCTCCCAGGAAATGATGGAGAAATCGAGCACCTTTTAAGCCCAAA  
TACTAGTAACCTCTTATGCACAGAATATTTATACAAATGCTGGTGATTTAACATCTGAAGG  
AATCCCAGGTTCTGGTTGCTACAGTCTGGAGCAAGAATTATCATCTTCAATTAGTTTGCC  
ACGCTAA

>OsWAK14, 2541.t00004, Chromosome 2, post-processing  
ATGAGCTCGAGCTTATTAGTGGCAGCTTGCGCCGTCTTTTTGTGCTGCTGTGCTCGGCT  
GCTACGTCCCCAGCATCGGCTGCAGTCTACGGAGTTGGCGGAGGGCTCTTGTCTATCCCT  
TCTAATGATTCCCTGGCTCATTGCCCTCTCGTTGCGGAGATGTTGGCATCGACTACCCC  
TTCGGGATAGCGCCGGGCTGTTTCCGGGAAGGCTTCGAGCTCATCTGCCGCAACACCGCC  
AAAACCTCTAAGCTCTTTTGGTGATGGTACTACTGAGATCACAGACTTGGGTTATAGG  
TATGTTTTGGCCAGATATACTTCAACATTACGGTGAGACCAGGTACGGATACCTACAAC  
ATATCCTGGGTGGCCCCAACAGAGGGTATTACTATTGATCATTACAACACATTTTACGTT  
ATCGGTTGTAATTTTCATGCTACCTTGTTCGAGTATGGCACGGAGGACCTCATAGGTTCT  
TGCATGAGTAGATGTGATGGTGAAGGACCAATAGGAGGGCCTTGTAATGGGATGGGA  
TGCTGTTTCATCGAGTTACCAAGGGTCTTGCGGGGCTTTCAGTCAACCATAATTCTTCGG  
TCGGATGGCATTCTGTAGCACAAACAGATCCAGTGCACCCTGGAATCATGGCTTTCATG  
TCATCGGACTATTATATATCAAAACACAAGTGACCTTTTCTTAGGTTGGACAAACACAAGT  
AATGTTGAAGGCACAGTACTTTCTTTTGTACCATAGATCAACCAAGCTGTGAACGCGCG  
CGCATGAACAACACAAGTTATGCGTGTAGCCCTGGCAGCAATTGCCGGAATGTGTCATCT  
GGAGGTTATCATTGTTACTGCTCTGGTTATGAACAGGGGAATCCTTACCTTCTAGATGGA  
TGCACGGATTACAACCCCAATATAAAGAACACTGTTCAACATCCTGTGGAGACATGAAG  
ATTCTTTCCCTTTTGGAGTCGAAGAAGGTTGTTTTGCTAACGAAAGGTTTAGACTTAAT  
TGTACAGAAGGTAACCTAACTGTTTGCGAATTAGGAGAAGCACAATATCATGTGACTGCT  
GTGTCTTTGGATGATGGGACTCTAACTGTCGGAACATGATGAATGACACAACTACGAG  
AAAGAGGCGATAATTGTTTCAGACCACAGATACTGGCCGTGATTATTCATTCTCAGGCCCT  
GTGGAAGATAGATTTGATCTCTCTATGGAATACGCCATTGTTATAAGATGGGCAGTTACC  
AACTTAACCTGTGAAGTAGCTGTGCAGAAGAACACTACATACGCATGCCGCAGTAGCCAC  
AGCTACTGCTGACAGTCACCCACAGGAAAGAGTTCATGGGATATCGTTGCAAGTGTCT  
CCCGGTTTTGAAGGAAACCCATACATCGAGGATGGCTGCACAGGTATTGCAATTGGAATT

OsWAKs-Supplemental Data 1[1].txt

GGTTGTGGTCTTGGCTCCATAGTTATCGTGTTGGGGGCAATGATACTTGCCAATAAGTGG  
AGGAAAGGCATCCAAAAGAGAATACGGAGAGCATATTTCAAGAAAAATCAAGGCCTACTC  
TTGGAGCAACTAATCTCAAATGAAAGCGCCACAAACAAACGAAGATATTTTCTTGGAA  
GAACTAGAGGAGGCAACCAACAACCTTTGATGGAACCTGTTCTTGGACGTGGAGGACAT  
GGCACAGTTTACAAAGGCATTCTATCTGACCAGCGTGTGGTGGCCATTAAAAAATCAAAA  
ATCGTTGAGCAAACTGAGATAGATCAATTTATCAACGAGGTTGTTATCTTATCTCAAATT  
ATCCACCGCAATGTGGTAAAGATTTTTGGTTGTTGCTTGAATCTGAGGTGCCACTGCTG  
GTTTATGAATTCATATCGAATGGCACACTGCATGACCACCTTCATACCGATCTTAGTGTT  
AGATGCTCGCTGTCATGGGATGATCGCATTAGGATTGCTGTAGAAGCAGCAGGGGCACTT  
TCCTATCTGCATTAGCTGCTGCAATACCAATTTTTCATAGAGACGTGAAATCTTCCAAT  
ATTCTCTTAGATGGCAGCTTTACTACAAAGGTCTCTGATTTTGGTGCTTCAAGATCTGTT  
TCATTGATGAAACTCATGTGGTGACTATTGTCCAAGGCACATTTCGGTTATCTAGACCCA  
GAGTATTATCATACTGGACAATACTGAAAAAAGTGATGTATATAGTTTTGGAGTGATA  
CTTGTGGAACCTTCTAATAAGAAAGAAACCAATTTTCATTAAATGAGGCAGGTGCAAAACAA  
AGCTTGCTCATTACTTCGTTGAAGGACTTCAAGAGGGCTCTCTAATGGAAATAATAGAT  
CCTCAGGTTGTTGAAGAGGCAACAAGGAAGAGATCGATGGAATTGCCTCGCTTACAATG  
GCATGCTTGAAGTTAAAGGAGTAGATAGACCTACTATGAAAGAAGTAGAGATGAGGCTG  
CAGTTCTGAAAACTAAGAGGCTAAGAAAAATCCAAGTCTCCAGGAAATGATGGAGAA  
ATCGAGCACCTTTAAGCCCAAATACTAGTAAGTCTTATGCACAGAATATTTATACAAAT  
GCTGGTGATTTAACATCTGAAGGAATCCAGGTTCTGGTTGCTACAGTCTGGAGCAAGAA  
TTATCATCTTCAATTAGTTTGCCACGCTAA

>OsWAK15, 2541.t00005, Chromosome 2, pre-processing

ATGAGCTCGAGCTTTCTGGCAGTTTGTGCCACTTCTTTTGTGCTGGTGTGCTCGGCAGCT  
ACGCCACGAGTATTGGCTTCAGTCTATGGAGTTGGTGGAGGGCTCTTGATTGTCCCTTCT  
AATGACTCCCTCGCTCACTGCCCTCTAGCTGCGGGGAAGTCGATGGCATCTCCTACCCC  
TTCGGGATTGGGGGAGGCTGCTTTTCGGGACGGCTTCGAGCTTACCTGCAACACCGCCACC  
AAAACCTCCCAAGCTCCTTGTGGCAATAGTACAACCCAGATAACAGCAATGGAATATGAC  
ATGGCTTTGGCTCCTATGTACTTCAATTTTACGACAAGGCAAGGTATGGACACCTACAAC  
ATTTTCATGGGTGTCGCCAGCTAAGGGTATTAATTTTTCAGATGAGAACACTTTCTATGTT  
GTCTGTTGTAATTTTGTATGCCACCTTGTTCGAGTTTGGTACGGGAGATTTCTGTTGTTCT  
TGATAGTAGTAGTGTACATTGAGAAGGCACCAATAGCAATAGGACAGCCTTGTAAATGGG  
AACGGATGTTGCTCCATCAAGTTATCAAGGGACATGCGGGGATTTTCAGTCAACACTTGT  
CAAGCTGAAGCTGCAGCACAAATATCAGATCCGCTGCATCATGGGATCATGGCTTTCATG  
TCATATACGGATTATTACGTACGTAATGCGAGTGATCTTTTCTTGAGTTGGACGAATGTG  
AGCAACGTTGAGGGAGCCGAGCTTCAGTTTGCCATCACGGACCAACCAAGCTGTGGAAGT  
GCACTGGTAAACAAATCAAGTTATGCTTGTACCACCGGCAGCAATTGCCAAAATATATCA  
TCGGGAGGTTACACCTGTGAGTGACCAATCGTTATCTACAAGGCAATCCTTACATTTTG  
GGAGGATGCAACATGCAAGGTAAGTCTTACCACCTTTAATTTCTGCAAAAATAAGACACA  
TATATCGATATATATCTAATTTTCTCCCTTGTCACTCTCTTTGTGGGACAGATTACAAC  
CCCAAGCATAAAGAACACTGTCCGACATCATGCGGAACCATGATCATTCCCTTCCCTTTT  
GGTCTGGAAGAAGGTTGTTTTGCAAAACAAAGGTTTCGGCTTAATTGTACTGTACATCAG  
ATCATATCACAGTTTTGGAAACAAGTGAAGCACAAATTTATTGTGACTAATGTGTCTGTTG  
AAGATGGGACTCTGACTATAAGTAATTTGTTGAATAATACGGAATATGGGAGAGAGATAC  
TAATAACTCAAGGTGACCAATATGGTGATACAGTGATTTATGGTCCTGTTGAAGATCGAT  
TTGACTTCTCTTTAGAATACAACATTGTTATAAAGTGGGCCGTAGCCAATTTAACTTGTG  
ATACCGATATAAAAAAGAATGCTACATATGCATAACGCAGTATCCATAGCGATTGCCTAA  
ACGTCACCCACGCAACATATTCATGGGATATCGTTGCAAGTGTCTTCTGTTTTCAAG  
GAAATCCATATATCCGAGATGGATGTAAAGGTTTGTTCCTGTTCAATCCCCTCCTATTTG  
CAATTTGTTTAAAGATTTTATAGAAGTTTTATGTGGATAGTTTAAACCATGGCATTTCCTT  
TTAGCCTTGTTCGGTTAATCCCATCTACAAGGGGATCAAGCGGGATTGGAATTAATCCCC  
TCCAATCCCTCTCTAACCGAACAAGGCTGTACTAGTGCCTAGCCTATGTCTATACGTTGT  
ACCAATAAAAAACAAAAAAACTGAAGAGTTAATTGCAGATATTGATGAATGCTCACTGCC  
AACTACTGCAATGGGACATGCCAAAATTTTCTGGAGGTTTTACATGCACTAGTTGCC  
CCACAGAAAAGAGTTTAAATCAATTACAAGACAGTGTGTTGCATCAGCTAAGCAACACAA  
TCTTATTATAGGTAAGTATAGCTGACAGATTAGTCAATCTTATTGCCTTAAGATAATGC  
AAAGTGGCTTCACGGCAGAAAATTAATGAATGGCTGTAGGTATTACAACCTGGTATTACTT  
GTGGCATTGGTTCCATAATTATTGCATTAGGTGCAATTATTCTAGCCAATAAGTGAAGA  
AAAGCATCCAAAAGAGAATTAGAAGAGCATACTTCAAGAAAAATCAGGGCCTACTCTTGG  
AACAGCTAATCTCAGATGAAAGCGCCACAAATTAACAAGGATATTTTCTTGGAGGAAC  
TAGAAGAGGCAACCAACAACCTTTGATGCTACTCGTGTTCTTGGTCGTGGAGGACATGGCA  
CAGTTTATAAAGGATTCTATCTGACCAGAGTGTGGTGGCCATTAAAAAATCAAAAATTG  
TGGAACAACTGAGATAGATCAGTTTATCAATGAGGTTGCTATTTTATCTCAAATTATCC

OsWAKs-Supplemental Data 1[1].txt

ATCGCAATGTGGTGAAGCTTTTTGGTTGCTGTCTCGAATCTGAGGTGCCCTTACTGGTAT  
ATGAGTTCATACCAAATGGTACATTGCATGATCGTCTTCATACTGATGTTAGTGTTAAAT  
CCTCATTATCATGGGATGATCGAATTAGGATTGCTTCAGAAGCAGCAGGGGCACTTGCTT  
ATCTGCATTGCGCTGCTGCAATACCTATTTTCCATCGAGATGTGAAATCTTCCAATATAC  
TCTTGGATGGCAGCTTTACTACAAAGGTCTCTGACTTTGGTGCTTCAAGATCTGTTTCAC  
TCGATGAGACTCATGTGGTGAATTTGTCCAAGGCACATTTGGTTATTTAGACCCAGAGT  
ATTACCATACTGGACAATACTGAAAAGAGTGATGTATATAGTTTTGGAGTGATTCTGG  
TGGAACTTTTGACAAGAAAGAAACCAATTTTCATCAACGATGTAGGCACAAAACAAAGTT  
TGTCTCATTATTTTCGTTGACAGACTCCGTGAGGGATCTCTTATCGAAATAATAGATTATC  
AGGTTCTTGAAGAGGCTCACAGGGAAGACATTGATGATATTGCCTCACTTACAGAGGCAT  
GCTTGAACTCAGAGGAGGAGATAGACCTACTATGAAAGAAGTAGAGATGAGGCTGCAAT  
TCCTGAGAACTAAGAGGCTAAGAAAATTCCAATTTCTCCAGTCCCAGGAAGTGGTGGAG  
AGATTGAGCAGCTTTTAAGCCCAATGCTGGTAAATCCCAAGCACAGAACAACTATACCA  
GTGCAGGTGATTTATCATATGAAGGGATCTCCAGTTGCTACAGTTTGGAGCAAGAATTAT  
CATCCTCAGTCAGTTTGCCACGCTAG

>OsWAK15, 2541.t00005, Chromosome 2, post-processing

ATGAGCTCGAGCTTTCTGGCAGTTTGTGCCACTTCTTTTGTGCTGGTGTGCTCGGCAGCT  
ACGCCACGAGTATTGGCTTCAGTCTATGGAGTTGGTGGAGGGCTCTTGATTGTCCCTTCT  
AATGACTCCCTCGCTCACTGCCCCCTAGCTGCGGGGAAGTCGATGGCATCTCTACCCC  
TTGCGGATTGGGGAGGCTGCTTTGCGGACGGCTTCGAGCTTACCTGCAACACCGCCACC  
AAAACCTCCCAAGCTCCTTGTGGCAATAGTACAACCCAGATAACAGCAATGGAATATGAC  
ATGGCTTTGGCTCCTATGTACTTCAATTTTACGACAAGGCAAGGTATGGACACCTACAAC  
ATTTTCATGGGTGTGCGCCAGCTAAGGGTATTAATTTTTCAGATGAGAACACTTTCTATGTT  
GTCTGTTGTAATTTTGTATGCCACCTTGTTCGAGTTTGGTACGGGAGATTTGTTGGTTCT  
TGTATGAGTAGATGTGACATTGAGAAGGCACCAATAGCAATAGGACAGCCTTGTATGGG  
AACGGATGTTGCTCCATCAAGTTATCAAGGGACATGCGGGGATTTTCAGTCAACACTTGT  
CAAGCTGAAGCTGCAGCACAAATATCAGATCCGCTGCATCATGGGATCATGGCTTTCATG  
TCATATACGGATTATTACGTACGTAATGCGAGTGATCTTTTCTTGAGTTGGACGAATGTG  
AGCAACGTTGAGGGAGCCGAGCTTCAGTTTGGCATCACGGACCAACCAAGCTGTGGAAGT  
GCACTGGTAAACAAATCAAGTTATGCTTGTACCACCGGCAGCAATTGCCAAAATATATCA  
TCGGGAGGTTACACCTGTGAGTGCACCAATCGTTATCTACAAGGCAATCCTTACATTTTG  
GGAGGATGCAACATGCAAGATCATATCACAGTTTGGAAACAAGTGAAGCACAAATTTATT  
GTGACTAATGTGTCTGTTGAAGATGGGACTCTGACTATAAGTAATTTGTTGAATAATACG  
GAATATGGGAGAGAGATACTAATAACTCAAGGACATGGCACAGTTTATAAAGGGATTCTA  
TCTGACCAGAGTGTGGTGGCCATTAATAAATCAAAAATTTGTGGAACAACTGAGATAGAT  
CAGTTTATCAATGAGGTTGCTATTTTATCTCAAATTATCCATCGCAATGTGGTGAAGCTT  
TTTGGTTGCTGTCTGCAATCTGAGGTGCCCTTACTGGTATATGAGTTTATACCAATGGT  
ACATTGCTATGCTCGTCTTATCTGATGTTAGTGTTAAATCCTCATTATCATGGGATGAT  
CGAATTAGGATTGCTTCAGAAGCAGCAGGGGCACTTGCTTATCTGCATTGCGCTGCTGCA  
ATACCTATTTTCCATCGAGATGTGAAATCTTCCAATATACTCTTGATGGCAGCTTTACT  
ACAAAGGTCTCTGACTTTGGTGCTTCAAGATCTGTTTCACTCGATGAGACTCATGTGGTG  
ACTATTGTCCAAGGCACATTTGGTTATTTAGACCCAGAGTATTACCATACTGGACAATA  
ACTGAAAAGAGTGATGATATATGTTTGGAGTGATTCTGGTGAACCTTTTGACAAGAAAG  
AAACCAATTTTTCATGACATGATGAGGCACAAAACAAAGTTTGTCTCATTATTTTCGTTGAC  
AGACTCCGTGAGGGATCTCTTATCGAAATAATAGATTATCAGGTTCTTGAAGAGGCTCAC  
AGGGAAGACATTGATGATATTGCCTCACTTACAGAGGCATGCTTGAACTCAGAGGAGGA  
GATAGACCTACTATGAAAGAAGTAGAGATGAGGCTGCAATTCCTGAGAACTAAGAGGCTA  
AGAAAATTCCAATTTCTCCAGTCCCAGGAAGTGGTGGAGAGATTGAGCAGCTTTTAAGC  
CCAAATGCTGGTAAATCTTCAAGCACAGAACATAACAGTGCAGGTGATTTATCATAT  
GAAGGGATCTCCAGTTGCTACAGTTTGGAGCAAGAATTATCATCCTCAGTCAGTTTGCCA  
CGCTAG

>OsWAK16, 2541.t00008, Chromosome 2, pre-processing

ATGAGGTCGAGCTTTGTGGCAGCTTGTGCCATTTCTTAGTGCTAGTGCTCGGCTGCT  
ACTACGCCTCGAGCATTTGCTGAGTCTATGGAGATGGCGGAGGGCTCTTGCTATCCCT  
TCTAATGATTCCCTCGCTCACTGCCCCCTAGCTGCGGGGATGTTGACGACATCGCCTAT  
CCCTTTGGGATTGGGCCGGGCTGCTTCCGGGAAGGCTTCGAGCTTAAGTGAACACCAGC  
ACCAAACTCCTAAGCTCTATATGAAAGATGGCACCACCCAGATCTTATATGTAGGTGAC  
GATGATCTTTGGGCACCCATGCACTTCAACATTACAATGAAGCCAGGTACTGATACCTAC  
AACATATCCTGGGTGCTTCCAGGAAGGGAGTTACTATTTCTCAGCGTAACACCTTCTAC  
ATTATTGGTTGTAATATTTGACCTTGTTCGAGTATGGTACGAGAGACGCTGTTGGT  
TACTGCGTGAGTAGATGCGATGGTGAAGAGGTACCAACAGAAGGGCCTTGTAACGGGAAA

# OsWAKs-Supplemental Data 1[1].txt

GGATGTTGCTCCATCAAGTTATCAAGGGATCTGCGGGGATTTTCGGTCAACACTAGTCCAA  
 GTTGATGCTACTGCAGCACAATCATATCAGCTGCAGCTGCGCCATGGTGTATGGCTTTT  
 ATGTGCATACAATGACTATTATGTAGATAATGCGACTGATCTTTTCTTGAGTTGGACGAAC  
 ACAAGCAATATCCAGGAAGCATTAGTTCAGTTTGCAATCATGGACCAACCAAGTTGTGAA  
 ATTGCTCGAATGAAAAATACGAGTTATGCTTGTAGCACCGGCAGCAACTGCCTAAATATG  
 TCATCTGGAGGTTACACCTGTGAGTGCGCCAATTATGATCTTTATTATTATTATGCAGAA  
 CAAAGTCCTTACCTTTTGAAGGATGCATCATCCGAGGTGATTCTCTCTACCTTTCTCC  
 ACTTAAATACTACTAAGGCACACACATATAGAGAGCTTTATTTGCATATCGAATTTTCAT  
 TCCTTCTCTCTTTCTAAGGCGCAAAACAAAAGTCTTCCGTATCGGTTTTTCGTTCATTTTT  
 CTCTCTCTGTGGAGCAGATTACAACCCCAAGCGGAAAGAACACTGTGCGAGATCATGCGG  
 AAACATGGCAATTCCTTTCCCTTTTGGTCTTGAAGAAGGTTGTTTCGCAAGTGAAAGGTT  
 CCAACTTAATTGTACAACAGGTAACATCACACTTTTCAACCCACGGGACGCACGTTATAA  
 TGTGACTGATGTGTCAATTGAAGAGGGGACAATGGTGGTTAGCAACTTGTGAACGACAC  
 AGAATATGGGGGAGAGGACATAATATCCCAGGTGTATGGTGGTGCAGAAATAAAGTGGGC  
 AGTAGCCAATTTAACGTGTGATGCCGAGTAAAAAAGATGCTACATATGCATGCCGAG  
 TATCCACAGCAATTGCCTAACGTCACCCATGGGAACATATTATGGGATATCGTTGCAA  
 GTGCCTTCCCGTTTTTCGAGGGAATCCATATATCCAAGATGGATGTGAAGGTTTGTTCCT  
 CTTCAATCCACCAATTTGCAAATGTTTAATAATTTTATAGAAATTTTATGTGGATAGTT  
 TAACCACGGCATTTCCCTTTAAGCAGGTAGTAGTGCCTGTGCATTTATATTGTACCAAT  
 ATAAACAAAAAAGACTGAAGCGTTAATTGCAGATATTGATGAATGCTTACTGCCAAAC  
 TATTGCAACGGGACATGTCAAATCTTCTGGAAATTTTACATGCACTAGTTGCCCGCGC  
 AGAAAGGAGTTTAAATCCAATTACAAGACAGTGTGTTGCATCAGCTAAGCAACACAATCTT  
 ATTATAGGTAAGTCATAGCTGACAGATTAGTCAATCTTATTGCATTAAGATAATGCAAAG  
 TGGCTTCACGGCACAAAAATAATGAATGGCTGTAGGTATTACAACCTGGTATTAGTTGTGG  
 CATTGGTTCCATAATTATTGCATTAGGTGCGATTATTCTAGCCAATAAGTGAAGAAAAAG  
 CATCCAAAAGAGAATTAGAAGAGCATACTTCAAGAAAAATCAGGGCCTACTCTTGGAACA  
 ACTAATCTCAGATGAAAGCGCCACTAATAAAACAAGGATATTTTCTTGGAGGAAGTACA  
 AGAGGCAACCAACAACCTTTGATGCTACTCGTGTCTTGGTGTGAGGACATGGCACAGT  
 TTATAAAGGGATTCTATCTGACCAGAGTGTGGTGGCCATTAAAAAATCAAAAATTGTGGA  
 ACAAACTGAGATAGATCAGTTTATCAATGAGGTTGCTATTTTATCTCAAATTTATCCATCG  
 CAATGTGGTGAAGCTTTTGGTTGCTGTCTCGAATCTGAGGTGCCCTTACTGGTATATGA  
 GTTCATACCAAATGGTACATTGCAGATCGTCTTCACTGATGTTAGTGTTAAATCCTC  
 ATTGTCAATGGGATGATCGAATTAGGATTGCTTCAGAAGCAGCAGGGGCACTTGCTTATCT  
 GCATTGCGCTGCTGCAATACCTATTTTCCATCGAGATGTGAAATCTTCCAATATACTCTT  
 GGATGGCAACTTTACTACAAAGGTCTCTGACTTTGGTGTCTCAAGATCTGTTTCACTCGA  
 TGAGACTCATGTGGTGACTATTGTCCAAGGTACATTTGGTTATTTAGACCCAGAGTATTA  
 TCACACTGGACAACCTAAGTGAAGAGTGTATATAGTTTGGAGTGATTCTGGTGGA  
 ACTTTTGACAAGAAAGAACCCGATTTTTCATCAATGATGTAGGCACAAAACAAAGTTTGTC  
 TCAATATTTCGTTGACAGACTCCGTGAGGATCTCTTATCGAAATAATAGATTCTCACGT  
 TCTTGAAGAGGCTCACAGGGAAGACATTGATGATATTGCCTCACTTACAGAGGCATGTTT  
 AAAACTCAGAGGAGGAGATAGACCTACTATGAAAGAAGTAGAGATGAGGCTGCAATTCCT  
 GAGAATAAGAGGCTAAGAAAATTCCAATTTCTCCCGTCCCAGGAATTGGTGGAGAGAT  
 TCAGCACCTTTTAAAGCCAGATACTGGTAAATCCCAAGCACAGAACAACCTATACCAGTGC  
 AGGTGATTTATCATATGAAGGGATCTCCAGTTGCTACAGTTTGGAGCAAGAATTATCATC  
 CTCAGTCAGTTTGCCACGCTAG

>OsWAK16, 2541.t00008, Chromosome 2, post-processing  
 ATGAGGTCGAGCTTTGTGGCAGCTTGTGCCATTTCTTAGTGCTAGTGTGCTCGGCTGCT  
 ACTACGCCTCGAGCATTAGCTGCAGTCTATGGAGATGGCGGAGGGCTCTTGTCTATCCCT  
 TCTAATGATTCCTCGCTCACTGCCCTCTAGCTGCGGGGATGTTGACGACATCGCCTAT  
 CCCTTTGGGATTGGGCGGGGCTGCTTCCGGGAAGGCTTCGAGCTTAAGTGCAACACCAGC  
 ACCAAAACCTCTAAGCTCTATATGAAAGATGGCACCACCCAGATCTTATATGTAGGTGAC  
 GATGATCTTTGGGCACCCATGCATTTCAACATTACAATGAAGCCAGGTACTGATACCTAC  
 AACATATCCTGGGTGTCTCCAGGAAGGGAGTTACTATTTCTCAGCGTAACACCTTCTAC  
 ATTATTGGTTGTAATATTGATGTACCTTGTTCGAGTATGGTACGAGAGACGCTGTTGGT  
 TACTGCGTGAGTAGATGCGATGGTGAAAGGATACCAACAGAAGGGCCTTGTAACGGGAAA  
 GGATGTTGCTCCATCAAGTTATCAAGGGATCTGCGGGGATTTTCGGTCAACACTAGTCCAA  
 GTTGATGCTACTGCAGCACAATCATATCAGCTGCAGCTGCGCCATGGTGTATGGCTTTT  
 ATGTCATACAATGACTATTATGTAGATAATGCGACTGATCTTTTCTTGAGTTGGACGAAC  
 ACAAGCAATATCCAGGAAGCATTAGTTCAGTTTGCAATCATGGACCAACCAAGTTGTGAA  
 ATTGCTCGAATGAAAAATACGAGTTATGCTTGTAGCACCGGCAGCAACTGCCTAAATATG  
 TCATCTGGAGGTTACACCTGTGAGTGCGCCAATTATGATCTTTATTATTATTATGCAGAA  
 CAAAGTCCTTACCTTTTGAAGGATGCATCATCCGAGGTAACATCACACTTTTCAACCCA



OsWAKs-Supplemental Data 1[1].txt

CGGGACGCACGTTATAATGTGACTGATGTGTCAATTGAAGAGGGGACAATGGTGGTTAGC  
AACTTGTGTAACGACACAGAATATGGGGGAGAGGACATAATATCCCAGGTGTATGGTGGT  
GCAGAAATAAAGTGGGCAGTAGCCAATTTAACGTGTGATGCCGAGTAAAAAAGATGCT  
ACATATGCATGCCGAGTATCCACAGCAATTGCCTAAACGTCACCCATGGGAACATATTC  
ATGGGATATCGTTGCAAGTGCCTTCCCGGTTTTCGAGGGAATCCATATATCCAAGATGGA  
TGTGAAGGTATTACAACCTGGTATTAGTTGTGGCATTGGTTCCATAATTATTGCATTAGGT  
GCGATTATTCTAGCCAATAAGTGGAAAGAAAAGCATCCAAAAGAGAATTAGAAGAGCATAC  
TTCAAGAAAAATCAGGGCCTACTCTTGGAACTAATCTCAGATGAAAGCGCCACTAAT  
AAAACAAGGATATTTTCTTGGAGGAAGTGAAGAGGCAACCAACAACCTTTGATGCTACT  
CGTGTCTTGGTCTGGAGGACATGGCACAGTTTATAAAGGGATTCTATCTGACCAGAGT  
GTGGTGGCCATTAAAAAATCAAAAATTGTGGAACAACTGAGATAGATCAGTTTATCAAT  
GAGGTTGCTATTTTATCTCAAATTATCCATCGCAATGTGGTGAAGCTTTTTGGTTGCTGT  
CTCGAATCTGAGGTGCCCTTACTGGTATATGAGTTCATACCAAATGGTACATTGCACGAT  
CGTCTTCATACTGATGTTAGTGTTAAATCCTCATTGTCATGGGATGATCGAATTAGGATT  
GCTTCAGAAGCAGCAGGGGCACTTGCTTATCTGCATTGCGCTGCTGCAATACCTATTTTC  
CATCGAGATGTGAAATCTTCCAATATACTCTTGGATGGCACTTTACTACAAAGGTCTCT  
GACTTTGGTGCTTCAAGATCTGTTTCACTCGATGAGACTCATGTGGTGAATTTGTCCAA  
GGTACATTTGGTTATTTAGACCCAGAGTATTATCACACTGGACAACCTAAGTAAAAAGAGT  
GATGTATATAGTTTTGGAGTGATTCTGGTGGAACTTTGACAAGAAAGAAACCGATTTTC  
ATCAATGATGTAGGCACAAAACAAAGTTTGTCTCATTATTTTCTGTTGACAGACTCCGTGAG  
GGATCTCTTATCGAAATAATAGATTCTCAGTTTCTTGAAGAGGCTCACAGGGAAGACATT  
GATGATATTGCCTCACTTACAGAGGCATGTTTAAACTCAGAGGAGGAGATAGACCTACT  
ATGAAAGAAGTAGAGATGAGGCTGCAATTCCTGAGAACTAAGAGGCTAAGAAAATTCCAA  
TTTCTCCCCGTCCCAGGAATTGGTGGAGAGATTGAGCACCTTTTAAAGCCAGATACTGGT  
AAATCCCAAGCACAGAACAACCTATACCAGTGCAGGTGATTTATCATATGAAGGGATCTCC  
AGTTGCTACAGTTTGGAGCAAGAATTATCATCCTCAGTCAGTTTGCCACGCTAG

>OsWAK17, 2421. t00020, Chromosome 2, pre-processing  
ATGACCTACAGCATCAGGAAGCTAAAATATGTTGATTGGTTCCTCTTGATGCAGGTTCCC  
CCTTGCAACGACAACCCCAAGGTTTGACATATCCTCCAAATCTATTAATTGTGCATACAA  
TTTAGCATTTGATGGCAGCCTTCAAGTCTGAAGTTTTCTTTGGCAACTATTTTCTAGGA  
CCTAAAGCATGCCACAGGGCATAAGTGGAGATGGCATGACTAAGGGGAATGGCTGCCAAA  
CGGGTCGAAGAAGCTTCCCATCACTATGGTAACCTCATCAGCTTCTGGAGTGCTACCTTT  
ATTTTTAACCTAAAAAACTACAGATTCTGAACAAACAGTTGAAAAAACATAATATCTA  
CATAAGCTATTGAATGCAATCGTTTTGTGATGTTTATAGCAGAGTAAGTATGCATAAC  
ATTTAGCTCATGGCATATGTTGAATATTACAGTCCAACAGGTCAACATGCCAAATCTAAA  
CCACTGAATCGTGCTAAATGAACATGAATCTGAAATTGAAGAAAAATAAAATAAGTCAAA  
AAAAATCAACATGATGATGATGATGATGATGATGATGATGATGATGATGATGATGATGAT  
TGACCTCGATCTGCCGCAAGCAATCACAAGTTGCAGCATAGCCTGCAATTATTCTTTG  
TTGTCAAATCTCATTAGCATCACTATAGTCTGTGTGGCACATTCCAATGAGAAAAA  
ACTTGTATCTGTTCCAACCTGTGCAGGTGCTATTATCGCACTGCCAGTTACAATAACCA  
CGACAGCATCATGTATCTACTGATATCTATTGAGTGGTCTAAGAAGATTGGGTTGAAAT  
TTAGCTTTCTTTTTGCGTTTTGTTTTGTTTTGTTTTGTTTTGTTTTGTTTTGTTTTG  
TGTGATCGCTGTGACTGAGAGTTAATCAATGATATAAAGTTATCATTTTTGTCAATT  
ACCAGCAACAGTAATAATCAGCATATTCTTAAAGGATGCCTAATTCCAACCTCCAAATAGG  
AGTATATTTCTATAGAGATCATTGGCATTCTCTAGAGTCTAGCTCTGTTTCTCCATTAGA  
AATNNNNNNNNNNNNNNNNNNNNNNNNNNNNNNNNNNNNNNNNNNNNNNNNNNNNNNCTAATTA  
CATATATTACGTGTAATTTGTGAGACGATTCTTTTAAACCCTAATTGCTCTATGATTTGAC  
ATGTGATGCTACAGTAACCATTTGCTAATGACGGATTAATTAATCTTAATAAATTTGTCT  
CGCAATTTACAGGCGGAATCTGTAATTTGTTTTAATATTAGTCTATGTTTATTGCTTTAA  
ATATGTGTCTGTAACCTCAAGGTTGCTACCGACAACCTACAGTGAAAATCGAATTCTTGGGC  
CGAGGTGGGCTGAGGTATACAAAGGCATTCTCCGCAATAAGAATTCACAGTGTTCACAG  
TGTTCAATGAGAGCCAGGTGGAACAATTCGTCAATGAAATTTCTATCCTGTCACAAATTG  
ACCACCCGAATGTGGTCAAGCTCTTAGGTTGCTGCCTAGAGACACAAGTGCCACTGTTTG  
GTATACGAATTTGTTCTAATGGGACTTTTATTACAGCATATTCACAGCCGGAATGCTCAT  
TGCTCTTGCCCAATTTGTCCTTCTATACCAATTGTTTACAGAGAATAACATAC  
TATTAGATGGGAATTATGTGGCCAAGGTATCTGACTTTGGTGCATCAAGATCAGTCCCAT  
TTGATCAGACTCATATGACAATTGTTCAAGGAACAATTGGATACCTTACAGCCAGCTCAC  
AGAGAAGAGTGATGTTTATAGCATTGGAGTTGTTCTTGCAGAGTTACTGACTACAGAGAA  
GCCAGTATCATTTGCCAGGCCAGAGGATTTGCGCAAGCTAGCCATGTACTATTTGGTAAT  
GTTGGTCAACAAGGTTGCACTTTCAAGCAGTAAAACCAATCATTTTGGCAGAAGCCAG  
AGAAGAGCAACTATGATGTTGACACCTCTCAATTATGTGCTTGAGTCTGAAGGGAGA  
ACAATCAACAATGAAGGAGGTGGCATCAGTTCTTAATGGGCTGAGAAGGTCACTGGCCAA

OsWAKs-Supplemental Data 1[1].txt

GGACAAAGCTATCAAAGGAAAAGAAGTGTACCCACAAAATAAGAATGAAGAAGAGGAATA  
CCTGCTTCCTGGATCAGGGGTAGGATCATCTCCACTCTCCACTCTTCAGAAGGAAGTAG  
GCAATGTAGCATGGAAGTTGAAATGATAGCTTCTTGCCATCTTACAAGATGA

>OsWAK17, 2421.t00020, Chromosome 2, post-processing  
ATGACCTACAGCATCAGGAAGCTAAAATATGTTGATTGGTTCCTCTTGATGCAGGTTCCC  
CCTTGCAACGACAACCCCAAGGTTGCTACCGACAACCTACAGTGAAAAATCGAATTCCTGGG  
CCGAGGTGGGCTGAGGTATACAAAGGCATTCTCCGCAATAAGAATTCACAGTGTTCCACA  
GTGTTCAATGAGAGCCAGGTGGAACAATTCTGTAATGAAATTTCTACTCTGTACAAAATT  
GACCACCCGAATGTGGTCAAGCTCTTAGGTTGCTGCCTAGAGACACAAGTGCCACTGTTT  
GACTCATATGACAATTGTTCAAGGAACAATTGGATACCTTACAGCCAGCTCACAGAGAAG  
AGTGATGTTTATGACATTGGAGTTGTTCTTGCAAGATTACTGACTACAGAGAAGCCAGTA  
TCATTTGCCAGGCCAGAGGATTTGCGCAAGTACGCCATGTACTATTTGGTAATGTTGGTC  
AACAAAGGTTGCATACTTCAAGCAGTAAACCAATCATTTTGGCAGAAGCCAGAGAAGAG  
CAACTATATGATGTTGCACACCTCTCAATTATGTGCTTGAGTCTGAAGGGAGAACAATCA  
ACAATGAAGGAGGTGGCATCAGTTCTTAATGGGCTGAGAAGGTCACTGGCCAAGGACAAA  
GCTATCAAAGGAAAAGAAGTGATCCCAACAAAATAAGAATGAAGAAAGGAATACCTGCTT  
CCTGGATCAGGGTAGGATCATCTCCACTCTCCACTCTTCAGAAGGAAGTAGGCAATGT  
AGCATGGAAGTTGAAATGATAGCTTCTTGCCATCTTACAAGATGA

Page 26

OsWAKs-Supplemental Data 1[1].txt

>OsWAK18a, gi|32990686|dbj|AK105477.1| Oryza sativa (japonica cultivar-group) cDNA clone: 001-127-A08, full insert sequence

TTATCATGGGATGCTGAGTGCTACGACCTACATTGGGAGGCTTATTCCGTTATTAGGAAGCTGTGAATGA  
TGCATTTCTCTGGGACTGCATGGTACATCATCAGCTATCTAAATACAAGGCACAGTTTTTGGCCATAAA  
CAATCCTGTTGATTTCTTGCAACTGAATGGACAACGGAGAGACAGCAATATTCCCTGAGTGTGTTTTGGA  
GAAAGCATAGTGATGATTAGTACCAACGCACATTCAAGGTAACAATATGTCTATTTTTATTTCTACCCCAA  
AACACAGGTCATACCCGAATGGCACAATACTAGGATCTGCAAGCTGGATTTTCAGGATCATAGTCATGG  
TGGTGTCTGAACCTTCTGATCCACATTTCTCTGTTCCATGTCAAGCAAGCTCTGCTTCTCCTCCGATTGG  
CATCACCTTTATCCCAGGGGTGTAGCTGGTATCTCCTCAGCATCTCCAGCTTCTCAGCGACCTCCTTCAT  
CATCGGTCGTTCTCACCCTCATGCTCACACATCGCATCACGAGGTGTGTAATCTCTTGGAGCACCTCC  
TCTGTCATCTCATTCTCACCCTGGCTGTCAATAAGTTCCTCATGGCGGCCATCTCTCACAGCCGTCATGA  
AGCAAGACACGAGGCTCCTGTCTTCTCTGATCCGCCGAAGTAGAGTGCCTTCTTCTGTTAGAAAGCTC  
CAGGAGGACAACACCAAACTGTACACATCACTCTTGTAGTCAAGTGCATGTGATGAGGTAATCAGGG  
TCTAGGTACCCACATGTCCCTTGCAACAGAGTTGCAATCTCGAAGTCAATCATTAGGCACCAAGTTTGATG  
TCCCAAAATCTGAAACTTTTGCAGGTGAGTTTGTATCAAGGAGGATATTTGCCGTCTTGACATCTCCGTG  
GAGGATGGGTGGTGGGCTGAAGAATGCATGTAGGAGAGTGCCTCTGCTGACTCTGCCGTATCCGAAGA  
CGAGAGTCCAAGGATATGACAGTGTGAGAGTGTGCCATGGATGTAGTGGTCGAGGGTGCCGTTTGAGA  
CAAATCATAAACTAGCATGGGAACCTTCGACTTCAAGACAACAACCGAGCAACTTGACGACGTTCTTGTG  
GTTGATCTGGGAGGATGCACATCTCTTCCGAAATCTTGGTCTGTGCCTCTCTATCATCTTTGAC  
TTCTTGTAGGCCACCACTATCTTGTCTCCAGGACGCTTTGTAGACGATGCCGTAGCCACCGGCCAA  
GAACACGGTCGGCGGCAAGCTGTTGGTGGCCTTCTCGAGCTCTTCTTGGAGAAAATCTTGAACCCACC  
CGCTCCGCCGCTGGTGCCACCATAGGAATCATCTGTTGCTGGAGAAGCACGCCACCGTTCTGCTCAAAG  
AATCTTTGCTTCGTTCTGATGAGCTTCTCTTTTGGAGCCCCAGGTAGAGCCAGAACAACATGAACAGTA  
ACAGGAACACACCGACGCTGACCCCTGAACATGGTATGCCAATGATATTCATTAGTTCCCGACAAGAAAA  
TAAGTGCATTAATAATGTTGCTTGATAACCGGCCGATTGAATACCTGTAACGACTTTTCAGAGCTAACGTG  
AACTTGTCCGTTGGGAGGC

>OsWAK18b, gi|32989040|dbj|AK103831.1| Oryza sativa (japonica cultivar-group) cDNA clone: J033148A20, full insert sequence

GATGTAGTGGTCGAGGGTGCCGTTTGAGACAACTCATAAACTAGCATGGGAACCTTCGACTTCAAGACAA  
CAACCGAGCAACTTGACGACGTTCTTGTGGTTGATCTGGGAGAGGATGCACATCTCCTTCGCAAAATTCCT  
TGGTCTGTGCCTCTCTATCATCTTTGACTTCTTGATGGCCACCACTATGTTGCTCTCCAGGACGCTTT  
GTAGACGATGCCGTAGCCACCGCGGCCAAGAACACGGTCGGCGGCAAGCTGTTGGTGGCCTTCTCGAGC  
TCTTCTTGGAGAAAATCTTGAACCCACCCGCTCCGCCGCTGGTGCCACCTTAGGAATCATCTGTTGCT  
GGAGAAGCACGCCACCGTTCTGCTCAAAGAATCTTTGCTTCTGATGAGCTTCTCTTTTGGAGCCC  
CAGGTAGAGCCAGAACAACATGAACAGTAACAGGAACACACCGACGCTGACCCCTGAACATGGTATGCCA  
ATGATATTTCAATAGTTCCCGACAAGAAAATAAGTGCATTAATAATGTTGCTTGATAACCGGCCGATTGAA  
TACCTGTAAACGATTTAGAGCTAACGTGAATCTTCCGTTGGGAGGCATCCATTCTCTGGGTGCAATT  
TCCACTAGTCCCCGGTCGGCATTGCGAGGTGTAGCTTCCGATTGTGTTTGTGCATTTTCCGAAGCATGGG  
TATTCCTTTGTGCGTTGGCATTATCGATGTCTAGCGTTGGCAAAGCAAAACATATTCATCACTTAATTT  
TTTTTTTGTGAGAAAGATTATTACTCTTTTGCCTTTTAGGCACCCACCTTTGCATCCACCGTCGAGGTA  
GGGTTGGCCTCGTAGCCCTTGAGACACCTGCACCGGTACCCCTGGCCGTCGCTGGCGTTGAAGCACTCG  
CTGTGCGCGCTCCGGCAGCGGTAGTCCGTCCTGTTGCGCAGGCGATGTCGAGTTGCCGCGTTCCGGA  
TGGCCCACTGAGCAGCAGCGGGACGGTGAAGTGCCTGTTGCTGTTGATGAAGCGCGATAGCTGTAGGT  
GGTGTGATCCACTTGTCTCCGCCACGAACACATACTGGCATTGTTGTTGAGTCGAGATGGCGGAAGACG  
GGTTCGTCGGCGGGAGCTCCTGTTGGTGGGGACGTTTCGCGTTGGTTCCTCTGTCTTATTCAACGTGA  
GTATGTAAGGCTTGTAGACGTTGAGAGCGCGGGGCATGGTGTCTGGCAGCACCCCGACTCGCCGGTGCA  
CTGGCCCGGCAAGTCAACCTGCGACTGCGACCGCGGCACGTGGATGTGACGCCAGTGACGTAGTTATCG  
TCGGCGTCAACCAAGTACGAAGGACGGGACCCGAGCAGCAGCAAGGCGGTTCTCGCTGTGGAGAACC  
GGTAGGCGATGCTGCGGCCGTAGTCCGGCGTGCGGTAGTGCCCACTGATTGCTTTGAAGCGGTGTCGTG  
GCAGTTGCTTCCCGCGTCGACGAAGACCCGGACCTCGCCGTGCGCGATGGAAAGGCTCACCAGCTTTTTC  
TCACGATCATCCAGGTAGTTGAAGTGGGAGTGTGTCGCTGCGACTCGAGCTGGAAGTCTTTGTCCCGGG  
CGCAGCCGGCGCCAATGCCGAAGGGGTAGGAGATGCTGATGTTCCCGCACTTGTGCGGGCAGCCCGGCCA  
TGGCTGAGCCGATGCCGTTGTACCCGGCGCCAAAGCAGCAGCATGACGGCTAATAAGTAGGCAACCCGCC  
TGATGCACTGTACTAGTGGTAGCCATTTCAACATGTATAATCGCCTTCGTGTTGTTCTTCTTGGCGCT  
TGCTTTTACATGCCGGCCGGGCTTGATATCCATATAAATAGATCGCGCACAAGCTTCTTCTTCTGTTTT  
TTGGAGGGCAAATATGCCAAGATCAGGAGGATGTGTATGGAAGCTGCGTCGTGTATTAGGAGTTGACTG  
AAAGAACACGCGCGACGTTCTTTTCTTAGAGGGCGCGCTGTGTTTAGTTCCCAAAGCAAAAAAACT  
TACGCTGTAAAAACAAAAATTTTTATGCTGTACATCAAATGTTTGAATACATGTATAGAATATTAATG  
T

>OsWAK19, 2477. t00018, Chromosome 2, pre-processing

# OsWAKs-Supplemental Data 1[1].txt

ATGGGGGGGGGTCCCGACTTTGGGTGTGTTTCCCTGGCGGGTGGGGCGGCGGTGTCCCGT  
CGTTGTGGGGTGACCCGCTCCATCTGTAGGTGGAGTTCAGGCGTGTCTCGAAGCGGTGGG  
GCAGCCCCCGGTGGTGTGACAAAAGTGTTCGCCCGGGGTGTGTACGTCCGATGTTT  
GTGTTACAGGCGACATCGCGCTGTGACCAGNNNNNNNNNNNNNNNNNNNNNNNNNNNN  
NNNNNNNNNNNNNNNNNNNGAATCACGCGCGTATACAACTCCCGCGCATAGACCTAGA  
CTCATATCCACATGTGCGCGGTCTATCAAATCCCACCTCTCAGACCTCATCTCCTTCTGC  
ACCCGGACGCCCCGCACGGACAGACGAAACAGAGAAGGCACACACCTTTACCGCCCATCA  
CCGCCCACCCGAAATGCACGGTGCCTTTCGAACAAAGCCCATCCCCCGGACGAAAACGC  
AACGAACGACCGGGGTACGTTTTTTTTTAAAGATCGAAGAAGTTAGACGAATGGCATACCG  
CCGTATATAGGCCATCGCCCGTATCAGCAGAGACATGCCACGTTTACAAATACGACCG  
GCTCGCGCGGACCCACGCGCAAAGGCAACCTCGAAGCCTGCGGCGGACAACCCATCCCG  
CAACGTACACAAAGCGACGCGCCATCCGCGAACGAAGTGGCACGAGGCACCCCCCCCCAC  
TCGTACCCCCCGGCCAAGCAGATCTCAAGAAAAGTACCCCTAGTTACGCCCCCTGCCGGC  
ATCGGCTCAGCCCGACAAGTGTCCACGGAGGTCCGGGTCTCGTAGACGCGGGAAGCAAT  
TGCCACGACGACAGCTTCAAAGCAATCAGGGGGCACTATACCGCACGCGGACTACGGTA  
GCAGCATTGCCTACCGGTTCTCCACGAAGAGGAACCGCCTTGTCTGTGCTCGGGTGCCCCG  
TCCTTGGCTACTTGATTGACGCCGACGATAACTATACGTACGTCACTGGCTGCACATCCA  
CGTGCCGGCGGTGCGAGTGCAGGGTGACTTGCCGGGGCAGTGACCGGGCGAGTCGGGGT  
GCTGCCAGAACACCATGCCCCGCGCTCTCAACGTCTACAAGCCTTACATACTCACGTTGA  
ATAAGACAGAGGAACCAACGCGAAACGTCCCCGACCAACAGGAGCTCCCGCCGACGGAAC  
CCGTCTTCCGCCATCTCGACTCCACTGAATGCCAGTACGTGTTCTGTGGCGGAGGACAGGT  
GGATCAACACCAACTACAGCTATCGCGCCTTCTTCAACCGAACCCAGCGACTTCGCCGTGC  
CCGTCTGTCTGACTGGGCCATCCGGAACGTGGCAGCTGCGACATCGCCGGGCGTCGGG  
CGCCGACGGCGATTAGGTTTGAGATTTGA

>OsWAK19, 2477.t00018, Chromosome 2, post-processing  
ATGGGGGGGGGTCCCGACTTTGGGTGTGTTTCCCTGGCGGGTGGGGCGGCGGTGTCCCGT  
CGTTGTGGGGTGACCCGCTCCATCTGTAGGTGGAGTTCAGGCGTGTCTCGAAGCGGTGGG  
GCAGCCCCCGGTGGTGTGACAAAAGTGTTCGCCCGGGGCGGACAAGTGTCCACGGA  
GGTCCGGGTCTCGTAGACGCGGGAAGCAATTGCCACGACGACAGCTTCAAAGCAATCAG  
GGGGCACTATACCGCACGCGGACTACGGTAGCAGCATTGCCTACCGGTTCTCCACGAAG  
AGGAACCGCTTGTCTGTCTGGGTGCCCCGTCTTGGCTACTTGATTGACGCCGACGAT  
AACTATACGTACGTCACTGGCTGCACATCCACGTGCCGGCGGTGCGAGTGCAGGGTGAC  
TTGCCGGGCCAGTGACCGGGCGAGTCGGGGTGTGCCAGAACACCATGCCCCGCGCTCTC  
AACGTCTACAAGCCTTACATACTCACGTTGAATAAGACAGAGGAACCAACGCGAAACGTC  
CCCGACCAACAGGAGCTCCCGCCGACGGAACCCGTCTTCCGCCATCTCGACTCCACTGAA  
TGCCAGTACGTGTTCTGTGGCGGAGGACAGGTGGATCAACACCAACTACAGCTATCGCGCC  
TTCTTCAACCGAACCCAGCGACTTCGCCGTGCCGTCTGTCTGACTGGGCCATCCGGAAC  
GTCCGCAGCTGCGACATCGCCGGGCGTCGGGCGCCGACGGCGATTAGGTTTGAGATTTGA

>OsWAK20 9630.t05379, Chromosome 2, pre-processing  
ATGGCCCTGGCGCCGGCGACACCAGCGTCGGCTCAGCCATTGCCTGGCTGCCCTGACAAG  
TGCGGCAACATCAGCATCCCTACCCCTTCGGCATCGGCGCCGTCTGTGCCCGCGGGCCC  
AAATTCCAGTCTGAGTGCAACACACCTACCCCTCCGCGCCTCATCGCCGTATCGAT  
TCCCAATCGAATTTGAGATCCATCTCGAAAGCCTGTCCCTCGCCGATGGTGAGGCCCGG  
ATATACAACAACGCGTCGCGGAGCTTGTACAACCACAGCACGGGGACCTCGTCCGCACA  
AACGACGTCTGTACTTGTCTTGGGACGGGAAGGCCCTTACCGCTTCTCGTCGGCCAAG  
AACCCTTTCGTGCACTCGGCTGCCCAACCTCGGCCTTCTATTAGACGCCACAGAAAAT  
TACGTGACCGGTTGCATATCCCTGTGCCGTCTGTGCCGTCTGCCGTGTGAGAGGGGCG  
TGCGCCGGCGTGGGATGCTGCCAGAGCTCGATACCCTCCGGTCTCCACACCTACTACGTG  
AACCAGGACAAGCCCAAGAACGTACCCCTTCACTATTATGCCGCCACTGATTACCGCTAC  
GTGTTCTTGGCGGACGCCGAGTGGCTCAGTACCAGCTACCGCGGTGACTTCAACCGGACC  
GGCGACTTCCCGGTGCCGTCTGTCTGGATTGGGCCATCCGGGAAGTCGGCAGCTGCGAA  
GCCGCCATGCGCAACAAGGCGGACTACGCGTGCCGGAGCGCCAACAGCGACTGCGTCGAC  
TCCACCGAGGGAGAAGGCTACCGTGAACGTCTCCAGGGGCTACGAGGGGAACCCCTAC  
CTCGACGGTGGATGCCAAGTGACAAAATTAAAAACGCCCTCCCGTGAATAAACTCCATTT  
TAACAGTGAGTTCAAAGCTAATTCCCGTCGATTTGGGCGATTGCGGAAGACATCGACGA  
GTGCGAGCGAGATAAGGACGCATGCTTCGGCAACAAGTGACCAACACGCTAGGAGGGTA  
CTTGTGCATGTGCCCGCCAGGTGCTCGTGGTAACCCGCTCATTGAAAAAGGCTGCGTCAA  
AACTGATCTAGGTAATAAATTAATCTTCTTATCATTTTGAATTTATCCAGACATCTAA  
ATTAATTGAAGATGCTAACTAATCTACCTGAGACTTGAGAGTGTCTAGCTATAATGTG  
CAACGGAATTTTCCCTTTATATTTTCACTTATGCTTATACTTATGAGTCAAAATTTAAA  
GTTGCAAAATTTGAATTTTCAACTTTAAATTTTGAATTTTATAGGATTTTTTATCGT

OsWAKs-Supplemental Data 1[1].txt

AGTTTATTTTTTCAGTCTTTGCTTCTAGATCGTTAAGAGTTAAGAATATGTATATAAAAGT  
 TTTATTCATAAATCTTTTTCGTTTGTAAATAAGCCAAACGACGGGTTGTTTTGTTGGA  
 GAGAACAGTGCATTGTTTCGGCCAAGTACCAGCACAAATTAATCTGTTCCATAAACAAACA  
 AAAGCAGACTACGATGTTTTTACAGGCTAATATTTCCATAAGGCTGATTTCTTATTAACC  
 AACTGTTTCGGCAAGTACTGGCACTAACGGTTCTCAATTACAAACAAATTCAGTACGCCTC  
 TCTAATGAAGAAAACTTTTTTCCCTTCTATTGTGCTCCAGGTTTAACTATTGGTATTGG  
 AGTTGGCAGTGGTGCGGGGCTTTTGGCCATGGCATTCCGGTGCAGTCTTTTAAACACGTAA  
 GATCAAGAATCGTAGAGCAAACATGCTTAGACAGATGTTCTTTAAGCAGAACCGTGGGCA  
 TTTGTTGCAACAATTGGTATCTCAAAATACCGACATTGCTGAAAGGATGATCATCCCCTT  
 AGCAGAATGGAAGGCAACAAACAAATTTGATGAATCTCGTGAGATTGGAGGAGGAGG  
 GCACGGCACCGTTTATAAAGGGATTCTATCGGATCTTCATGTTGTTGCGATCAAGAAATC  
 AAAGGTAGCAATCCAAAGAGAGATTGATGAGTTCATAAACGAGGTAGCCATTCTCTCACA  
 GATTAACCATCGCAATGTGGTGAAACTTTTTGGATGTTGCCTAGAGACAGAAGTGTCATT  
 GTTGATTTATGAATTCATATCGAATGGTACCCTTTACCACCATCTTCATGTTGAAGGGCC  
 ATTATCATTGTGTCATGGGAAGATAGACTCAGAATTGCAACTGAAACAGCTAGAGCCCTCGG  
 CTACCTTCACTCGGCTGTATCATTCCCCATAATTACAGGGACATCAAGTCCCATAACAT  
 CTTATTAGATGGCTCCCTAACAGCAAAAGTATCAGACTTTGGAGCTTCAAGGTGTATTCC  
 TGCTGAACAGACAGGAGTCACAACCTGTTATTCAAGGAACACTAGGATACTTAGACCCCAT  
 GTACTCTTACACGGGACGTCTCACCGAGAAGAGCGACGTTTTAGCTTTGGTGTGTTCT  
 AATAGAGTTACTTACTAGGAAAAAACCATACTCATACAGATCACCTGAGGATGACGGTCT  
 TGTTTTCGCATTTCACTACGCTACTCACACGTGACAACCTGGGTACATACTTGATCCTCA  
 AGTCGTGGAAGAGGGAGGAAAAAGAAGTTAAAGAAGTAGCTTTGTTAGCTGTGGCATGTGT  
 CAAGCTGAAAGCAGAGGAGCGGCCACTATGAGACAGGTGGAATGACACTTGAAAGCAT  
 AAGATCATTGTTTCTGCAGCAAGAAGCTATACATAGCATGGCCAATAAAAGTTCTAAGGA  
 GAATCATGTCTCAATGAGTTACCCGGCAAATGAAGGCACAAGTATGGAGTCGACAAAACA  
 GTATAGCCTTGAAGAAGAGTACTTGCTCTCTTCAAGGTATCCCAGGTAG

>OsWAK20 9630. t05379, Chromosome 2, post-processing  
 ATGGCCCTGGCGCCGGCGACACCAGCGTCGGCTCAGCCATTGCCTGGCTGCCCTGACAAG  
 TGCGGCAACATCAGCATCCCCTACCCCTTCGGCATCGGCGCCGTCTGTGCCCGCGGGGCC  
 AAATTCAGCTCGAGTGCAACCACACCTACTCCCCTCCGCGCCTCATCGCCGTATCGAT  
 TCCCAATCCAATTTGGAGATCCATCTCGAAAGCCTGTCCCTCGCCGATGGTGAGGCCCGG  
 ATATACAACAACGCGTCGCGGAGCTTGACAACCACAGCACGGGGGACCTCGTCCGCACA  
 AACGACGTGCTGTACTTGTCTTGGGACGGGAAGGCCCTTACCGCTTCTCGTCGGCCAAG  
 AACCGTTTTGTCGCACTCGGCTGCCCCAACCTCGGCCTTCTATTAGACGCCACAGAAAAT  
 TACGTGACCGGTTGCATATCCCTGTGCCGGTCTGTCGCCGCTCGCCGTGTGAGCAGGGGCG  
 TGCGCCGGCGTGGGATGCTGCCAGAGCTCGATACCCTCCGGTCTCCACACCTACTACGTG  
 AACCCAGCAAGCCCAAGAAGTACCCCTTCACTATTATGCCGCCACTGATTACCGCTAC  
 GTGTTCTTGGCGGACGCCGAGTGGCTCAGTACCAGCTACCGCGGTGACTTCAACCGGACC  
 GGCGACTTCCCGGTGCCGTGCTGCTGGATTGGGCCATCCGGGAAGTCGGCAGCTGCGAA  
 GCCGCCATGCGCAACAAGGCGGACTACGCGTGCCGGAGCGCCAACAGCGACTGCGTCGAC  
 TCCACCGAGGGAGAAGGCTACCGCTGCAACTGCTCCAGGGGCTACGAGGGGAACCCCTAC  
 CTCGACGGTGGATGCCAAGACATCGACGAGTGCAGCGAGATAAGGACGCATGCTTCGGC  
 AACACCTGCACCAACAGCTAGGAGGTACTTGTGCATGTGCCGCCAGGTGCTCGTGGT  
 AACCGCTCATTGAAAAAGGCTGCGTCAAAACTGATCTAGGTTTAACTATTGGTATTGGA  
 GTTGGCAGTGGTGCGGGGCTTTTGGCCATGGCATTCCGGTGCAGTCTTTTTAACACGTAAG  
 ATCAAGAATCGTAGAGCAAACATGCTTAGACAGATGTTCTTTAAGCAGAACCGTGGGCAT  
 TTGTTGCAACAATTGGTATCTCAAAATACCGACATTGCTGAAAGGATGATCATCCCCTTA  
 GCAGAACTGGAAGGCAACAAACAAATTTGATGAATCTCGTGAGATTGGAGGAGGAGGG  
 CACGGCACCGTTTTATAAAGGGATTCTATCGGATCTTCATGTTGTTGCGATCAAGAAATCA  
 AAGGTAGCAATCCAAAGAGAGATTGATGAGTTCATAAACGAGGTAGCCATTCTCTCACAG  
 ATTAACCATCGCAATGTGGTGAAACTTTTTGGATGTTGCCTAGAGACAGAAGTGTCATTG  
 TTGATTTATGAATTCATATCGAATGGTACCCTTTACCACCATCTTCATGTTGAAGGGCCA  
 TTATCATTGTGTCATGGGAAGATAGACTCAGAATTGCAACTGAAACAGCTAGAGCCCTCGGC  
 TACCTTCACTCGGCTGTATCATTCCCCATAATTACAGGGACATCAAGTCCCATAACATC  
 TTATTAGATGGTCCCTTACAGCAAAAGTATCAGACTTTGGAGCTTCAAGGTGATTTCCT  
 GCTGAACAGACAGGAGTCACAACCTGTTATTCAAGGAACACTAGGATACTTAGACCCCATG  
 TACTCTTACACGGGACGTCTCACCGAGAAGAGCGACGTTTTTAGCTTTGGTGTGTTCTA  
 ATAGAGTTACTTACTAGGAAAAAACCATACTCATACAGATCACCTGAGGATGACGGTCTT  
 GTTTCGCATTTCACTACGCTACTCACACGTGACAACCTGGGTACATACTTGATCCTCAA  
 GTCGTGGAAGAGGGAGGAAAAAGAAGTTAAAGAAGTAGCTTTGTTAGCTGTGGCATGTGTC  
 AAGCTGAAAGCAGAGGAGCGGCCACTATGAGACAGGTGGAATGACACTTGAAAGCATA  
 AGATCATTGTTTCTGCAGCAAGAAGCTATACATAGCATGGCCAATAAAAGTTCTAAGGAG

AATCATGTCTCAATGAGTTACCCGGCAAATGAAGGCACAAGTATGGAGTCGACAAAACAG  
TATAGCCTTGAAGAAGAGTACTTGCTCTCTTCAAGGTATCCCAGGTAG

>OsWAK21, 2477. t00014, Chromosome 2, pre-processing  
ATGGGGGTGTTTTCCAGCTTAGGCGTCGTAGTGTTGCTGTTACTGTTAGTCGTGCGCCTG  
GCGCCGGTGAGACCAGCGTCGGGTACGCCATTGCCGGGCTGCCCCGACAGGTGCGGCAAC  
ATCAGCGTTCCTACCCCTTCGGCATCGGCGCCCGCTGCGCCCGCGACTTCGGCTACGAG  
CTCTTCTGCAACCACAGTACTTCCCTCCGCGCCTCACCTTCTTCCCTCCACTCCCCACG  
CCTACATCGATCTTGGCCGGGCGCCGGCTGAATCTGGCCAGCCTGTCCATCGCCGACGGC  
GAGGCCGTAGCTCTCGTCAACGTGTTCCGCCAGTGCTACAGCAGCAACGAGAGCTACGTC  
AGCGACAACCTCCGTAACCTACACGGTGACCTGTCCCTCCTTGGCAGCAACACCTACCGC  
GTATCCGCCCGGAGGAACCGCTTCGTGCGCGCTCGGCTGCCCCAACCTCGGCTACCTCAGC  
GACGACGCGGGCTACTACATCACCGGCTGCACGTCCGTCTGCCGACCGTCGCAGTGGAAC  
TCCGTGTGCGCGGCGGCGTGCACCGCGCTTGGGTGCTGCCAGAGCAGGATACCACCAAT  
GTCACCTACTACGAGGCGTCCGTTCAAGGCTTCCAGGAAGCCAGGGGAGAATCTTCCGC  
GAGAACACGACTTCTTGGCGGTACGCGTTCGTGGTGGAGGACAGGTGGGTGACACCACC  
TACCGGGACAGCGCCGACTTCAACCGGACCGACGACTTCGCCGTCCCCGTCTGTCTCGAC  
TGGGCCATCCGGAACGTGCGCAACTGCGACATCGCCAAGCGCAACAGGACGGACTACGGG  
TGCAGGAGCACCAACAGCGATTGCGTGCAGTCCACCAATGGTGTGGATACCGCTGCAAG  
TGCTCCAATGGCTACGACGGCAACCCCTACCTTGACGGTGGATGCACAGGTATACAATAC  
TAGACACCTTAATACAATGCAGATATTGGTTATCAAGTTAACATTGAGGATTGTTCAATTT  
GCTCGCCATTCTTATATTCTCTGCCCTCAAATAAATAACAATCATTCTGACAAGAAGTGA  
TGAGTTTGTCTTCTTCCAAGATATTGACGAGTGCCAACACTTAGACAAGTACCCAT  
GCCACGGAGTCTGCACAAATCTGCTGGGAGGCTATAAGTGTGATTGCCCTCATGGATTCA  
GCGGAGATGCCATAAAAAATGATTGCCGTCCAAACGACAAGTTCACATTAGCACTGAAAA  
TAGTCACAGGTAATTTTGAGACATAAGGAGGTGTTTGGTTCATGGCCACACCACACTTT  
TGACTGCCACAGTGTGTTAGGTATATGTTTGTCTCACTGCCACAGTTGTGACTTGCCACA  
TTTTTTCAATACCATGTCCTACATGTATAGACTTAATTTTTTTTGGCAACTTTAACACA  
TTTTGTGGCTAGCAATTTGTCCACCACACTTTTTGTGGCTGCTACAACCTTACCTAATGTTA  
GTTGTGGCAAAGTGTGGCCAGCAACCAACACACCCTAATGCACCTTTCTCTCTATTGAT  
TCTCCGATTTCTGATGAGTGACATTGCAATGCCATCTTCAGGGGTCAGCGTTGGTGTGTT  
CTTGTGCGTGTTTCATGTGCTTTTGGTTGACTTGGGGCTCCAGAAGAGGAAGCTCATCAG  
AACAAGCAAAGATTCTTCGAGCAGAACGGTGGAGTGATCCTCCAGCAGCAGATGCACTC  
TGGTGGAGGCACTGGTGGGTTCAAATATTTTCCACGGAAGAGCTCAAGAAGGCCACCAA  
CAACTTCGCGGCTGACCGTGTTCTCGGCCGCGGCGGTACCGTGTTGTCTACAAGGGTGT  
CCTGGAGGACAACATGGTGGTGGCCATCAAGAAGTCCAAGATGATGGAGGAGGCTCAAAC  
CAAGGAATTTGCTAGAGAAATGTTTATTCTCTCCAGATCAATCACAGGAATGTCGTCAA  
GCTGCTCGTTGCTGCTCGAGGTAGAAGTGCCCATGTTAGTCTATGAATTTGTCTCAA  
CGGCACCCTCTACCCTACATCCATGGCAAGGAACCCACAACCTGACATAGCACTTGATAA  
CCGTCTTCGGATAGCCGCAAAGTCCGCCGAGGCGCTCGCCTACATGCATTATCAGCTTC  
TCCACCAATCCTCCATGGAGATGTCAAGACGGCTAACATCCTACTTGATGACAAGCTCAA  
CGCCAAAGTTGCAGATTTTGGAGCATCCAACTAGCACCAACTGATGAGGCTGCAATTGC  
CACGTTGGTGCAGGGAACCTGTGGGTACTTGGACCCTGAGTACCTAATGACATGCCAGTT  
AACCATAAGAGCGATGTCTACAGTTTTGGTGTGCTGCTGGAGCTTCTAACAGGAA  
GAAGGCATTGTACCTAGACGGGCCAGAGGAAGACATGAGCTTGGTGTACGCTTCACCAC  
AGCAGTGAAGGCTGGTGCATCGAGAGCTTATGGACAGCCAAGTGAAGAAAGAGATGAA  
CGACGAAATGGCAACAGAGATTGCAGACCTCCTCATGCGATGCCTAAGCATGAACGGTGA  
AGAACGACCAACGATGAAAGAGGTAGCAGAGAGGTTGGAGATGTTGAGGAGATACCAGCA  
GCACCTTGGGCTGAAGCTAAAGGTAATGCTGAGGAGAATCAAAGCTTGCTTGGCATTGA  
ACATCAAAATCCAATTAACCAATTCAAGCAGCATGATGTTCTTGATCTGGAAGAAGGAAG  
TACATATACATTTAGCTTGTAGATAATGTTGTTTGCCTAATCTTTTATAAATCAATGAA  
TTCACATACAAATTTCTTTCTATGTAATATGAAAACACATCCATGGGGTGCAACCAAAGA  
ACGACCAAGAAATTTATGTGTTCTGTAATATAAAAGCAAGAAATTGCATAGACGATAGAG  
AAGAATGGTATGTCACTATGAGTATTGAAAGGTTTCATGTCCGTTCTTCTCTTAAAGAAA  
AGGTGAAAACAACATGATGATAGACAACCTCATGATCATTAAATAGAAACATTTAAATAA  
GAAGATAAGGACTTGCCACAAAATCAAAGATATATATACTGTAAGCGAGTTACATTGGA  
TTGTCATGGGGAATTTCTCCCCAAATACCGCCGTGTATGGGTGAGGACCATCACACTCC  
TAGAGTTGGTGTGCTCAATGAAGGGAGGCGATCGTCCCTGACAGGATTTTTTTTTCTTCTA  
CACAGAGTAGGTCATCTCTGCATGCCTGATTTGACAAGAACCATACCAAATTAGTAGAGT  
TATTCGTAATTTTGCAGCGCTCACAGACAGATGGAGTCGGCGGCGGAGTAGGAACA  
GCCTGCGGATGGCGTAGCGGACAGCTCCCTCCCAGCTCCCAGAGGATGGAAGGAACGGAG  
GACCTTCTGGTAGACACCATGTATGGCGCTGTGGCGGAGACAATGACAGTCTGCGCCTCC  
GACGACGCGGCGGAGGCACGGGAGGAAGGGTCCAGCCGCGGCGCTGACCTGCTTGA

OsWAKs-Supplemental Data 1[1].txt

GACAGAGAGAGAGAGAGAGAGAGAGAGAGAGAGAGAGTGGGTGGGGAGGATGATACGTGAAG  
GGCTGAAGGCCCTCGAGACACATTGAGCCTTGTGGGAAGGCCATTAGAGAGGAGAAGGCC  
TAGTATTGGGCCCTTTTGTGGCTCTTTGCGATGAGCGAACTGGGCCGAACTGTACG  
AGATGGAATAAGTCTACTGTCTGGTGGACTAGACAAGCTACCTACTCCCTTTTCACTTGG  
TGTAATACACATCCCGGATCAATAAATATAAATATAAATATAGTAGGGTCATTTTTTCA  
TTGAAGATCTAAATCTGAATAGGGGGATGCTTTACAACGGAATCCCGTTGAGCGGGATG  
ATACCGGTTAGGTATCAGGACATGATACCTATTAGATATCATGCGATTTCTACCACGTAT  
CAAATGATACTTGAAGGTATTAGACGATTCTATCAGGTATCATGTGATTATACTTACG  
AGGTATCATGTGATACTTGGTATTGACTTATTCTCGTTGATACCAGATCGATACCGACTG  
ATATCAGGTGATTCTACTGGGTATCAGGAGCCAGGCACCAAGGCATCATCGTCGGTGGCC  
GTGTCTCCGCGTTTGGCAAGTCTTTACCGTCACTCCCCACGCTGGAGCTCGGCGGCG  
GCGGCCTCACGTCCCATGCCGGAGATCGACATCCTCCGCCATCCATGTTCCACGCCGGAG  
CTCATCGCCGGCGGCCGCGTCTCCGCTGCCTCGCCCTACGCCGGGCTCGTCGCTAG

>OsWAK21, gi |37988964|dbj |AK119341.1| Oryza sativa (japonica cultivar-group) cDNA  
clone: 001-131-D09, full insert sequence

AACGAGAAGCAATGCAGAGTTCAGAAATGGGGGTGTTTTCCAGCTTAGGCGTCGTAGTGTTGCTGTTACT  
GTTAGTCGTCGCCCTGGCGCCGGTGAGACCAGCGTCGGGTACGCCATTGCCGGGCTGCCCCGACAGGTGC  
GGCAACATCAGCGTTCCTACCCCTTCGGCATCGGCGCCCGCTGCGCCCGCGACTTCGGCTACGAGCTCT  
TCTGCAACCACAGCTACTTCCCTCCGCGCCTCACCTTCTCCCTCCACTCCCCACGCCTACATCGATCTT  
GGCCGGGCGCCGGCTGAATCTGGCCAGCCTGTCCATCGCCGACGGCGAGGCCGTAGCTCTCGTCAACGTG  
TTCCGCCAGTGCTACAGCAGCAGCGAGAGCTACGTACGCGACAACACCCGTAACCTACACGGTGTACCTGT  
CCCTCCTTGGCAGCAACACCTACCGCGTATCCGCCGCGAGGAACCGCTTCGTGCGCTCGGCTGCCCAA  
CCTCGGCTACCTCAGCGACGACGCGGGCTACTACATCACCGGCTGCACGTCCGTCTGCCGACCGTCGCAG  
TGGAACCTCGTGTCGCCGGCGGCGTGCACCGCGTGGGTGCTGCCAGAGCAGGATACCACCAATGTCA  
CCTACTACGAGGCGTCCGTTCAAGGCTTCAGGAAGCCCAGGGGAGAATCTTCGCGGGAACACGACTTC  
TTGCCGGCACGCGTTCGTGGTGGAGGACAGGTGGGTGACACACCTACCGGGACAGCGCCGACTTCAAC  
CGGACCGACGACTTCGCCGTCCCGTCTGTCTGACTGGGCCATCCGGAACGTGCCAACTGCGACATCG  
CCAAGCGCAACAGGACGGACTACGGGTGCAGGAGCACCAACAGCGATTGCGTCGACTCCACCAATGGTGT  
CGCATACCGCTGCAAGTGCTCCAATGGCTACGACGGCAACCCCTACCTTGACGGTGGATGCACAGGTATA  
CAATACTAGACACCTTAATACAATGCAGATATTGGTTATCAAGTTAATATTGAGGATTGTTCAATTTGCTC  
GCCATTTCTATATTTCTGCCCTCAAATAAATAACAATCATTCTGACAAGAAGTGATGAGTTTGTTC  
CTCTTCCAAGATATTGACGAGTGCCAACACTTAGACAAGTACCCATGCCACGGAGTCTGCACAAATCTGC  
TGGGAGGCTATAAGTGTGATTGCCCTCATGGATTACGCGGAGATGCCATAAAAAATGATTGCCGTCCAA  
CGACAAGTTCACATTAGCACTGAAAATAGTCACAGGTAATTTTGGAGACCTAAGGAGGTGTTTGGTTCAT  
GGCCACACCACACTTTTGAAGTGCACAGTGTGTTAGGTATATGTTTGTTCCTGACGATTTGTGACTT  
GCCACATTTTTTCAATACCATGTCTACATGTCTAGACTTAATTTTTTTGCCAACTTTAACACATTTT  
GTGGCTAGCAATTTGTCCACCACTTTTGTGGCTGCTACAACTTACCTAATGTTAGTTGTGGCAAAGTG  
TGGCCAGCAACCAACACACCTAATGCACCTTTCTCTCTATTGATTCTCCGATTCTGATGAGTGACAT  
TGCAATGCCATCTTCAGGGGTACGCGTGGTGTGTTCTTGTGCGGTGTTTGTGCTTTTGGTGTACTTG  
GGGCTCCAGAAGAGGAAGCTCATCAGAACAAAGCAAAGATTCTTCGAGCAGAACGGTGGAGTGATCCTCC  
AGCAGCAGATGCACTCTGGTGGAGGCACTGGTGGGTCAAATATTTTCCACGGAAGAGCTCAAGAAGGC  
CACCAACAACCTTCGCCGTGACCGTGTCTCGGCCGCGCGGTACGGTGTGCTACAAGGTGTCTG  
GAGGACAACATGGTGGTGGCATCAAGAATCAAGATGATGGAGGAGGCTCAAACCAAGGAATTTGCTA  
GAGAAATGTTTATTCTCTCCAGATCAATCAGGAATGTGCTCAAGCTGCTCGGTTGCTGCTCGAGGT  
AGAAGTGCCCATGTTAGTCTATGAATTTGTCTCAAACGGCACCTCTACCACTACATCCATGGCAAGGAA  
CCCACAACCTGACATAGCACTTGATAACCGTCTTCGGATAGCCGCAAAGTCCGCCGAGGCGCTCGCCTACA  
TGCATTATCAGCTTCTCCACCAATCCTCCATGGAGATGTCAAGACGGCTAACATCCTACTTGATGACAA  
GCTCAACGCCAAAGTTGCAGATTTTGGAGCATCCAACTAGCACAACCTGATGAGGCTGCAATTGCCACG  
TTGGTGCAGGGAACCTTGGGTACTTGGACCTTGAGTACCTAATGACATGCCAGTTAACCGATAAGAGCG  
ATGTCTACAGTTTTGGTGTGCTGCTGGAGCTTCTAACCAGGAAGAAGGCATTGTACCTAGACGGGCC  
AGAGGAAGACATGAGCTTGGTGTACGCTTACCACAGCAGTGAAGGCTGGTGTGCTCATCGAGAGCTTATG  
GACAGCCAAGTGAGGAAAGAGATGAACGACGAAATGGCAACAGAGATTGCAGACCTCCTCATGCGATGCC  
TAAGCATGAACGGTGAAGAACGACCAACGATGAAAGAGGTAGCAGAGAGGTTGGAGATGTTGAGGAGATA  
CCAGCAGCACCTTTGGGCTGAAGCTAAAGGTAATGCTTGAGGAGAATCAAAGCTTGCTTGGCATTGAACAT  
CAAAATCCAAATTAACGATTCAGGCAGCATGATGTTCTTGATCTGGAAGAAGGATACATATACATTTA  
GCTGTAGATAATGTTGTTTGCCTAATCTTTTATAAATCAATGAATTCACAT

>OsWAK22, 2477.t00012, Chromosome 2, pre-processing  
ATGGCTACCACTACCCTGTGCCTGCAGGGTGCGGCCCTCGTCTGTTGATCGTCTGCCTG  
GCGCGGTGGCACCAGCTGGGCTCAGCAGCCGGCGGGCTGCCCCGACAAGTGCGGGAAC  
ACCAGCATCCCTACCCATTGGCATTGGCTCCCGCTGTGCCGCGACTTCAACTCCGG  
CTCGTTTGAACACGCCTACTCGCCTCCGCGCCTCTTCGTGTCTGAAGTCGAGCTGGTT

OsWAKs-Supplemental Data 1[1].txt

AGCCTGTCCCTCGACGGCGAGGCCCGGGCCCTCATCAACGCCAGAACTATTGCAGCGAC  
GGCACAACCTACATCAGTTACAATGCTTTGAGGAGGGACAGCCAGGGCCAGCTGCCGTTG  
TCTGATGTGTCTTTTCGGCCGTAGCACCGCCTACCGCTTCTCCGCGGCGAGGAACAGGTTT  
GTCGTGCTCGGTTGCCCCGTCTCGGTTACCTGGTTGACGCCGAGGAGTACTATGTCAGC  
GGCTGCATATCCATGTGCCGCAAGTCGCAAGCCGGTAATGATCACCTGGTATGGCTGCCA  
GAACACCATACCTCGGCCTCTCAACTTCTACAAGCCTTACATCCTCAGCTTGAATAAGTC  
GGCAGAGGAGAACC CGGTGGAACCCATCTACCATCGCCTCAACTCGACGGCATGCAATTA  
CATGTTTCTGGTGGAGGACAAGTGGATCGACACCACGTACAGCTATCGCGCCTACTTCAA  
CCGAACCGACGACTTCGACGTGCCCGTCTGCTCGACTGGGCGATTGGAACGTCCGCAA  
CTGCAGGGTCGCCAAGCGCAACGCCACCAAGTACGCGTGCCGGAGCGAGTGGAGCGAGTG  
CTTCGACGCCAGCGACGGCGTCGGATACCGGTGCAGGTGCTCCAATGGCTACCAGGGTAA  
CCCCTACCTCGACAGCGGATGCACAGGTAATCATTTTAAACCAATCAACTGTTACTTGTCT  
TCTATGGCTCCCATCGTTTGGTTATTACGGAATAAACCAAACGGCATATTTGTAAACGA  
AAAAATAATTTGTAAATAAACTTTTTATGTCGGTGTTTTTAACTTTAAAAGCAAAGACT  
GAAAAATAAACTTCGACGAAAAAACCTCAAAATCAACTTTAAATTTAAGGTTATAAATTC  
AAATTTTAACTAACAATCATAAACATAAGTGAAGAGATGGGACTGTATATTTTCTTGGAT  
ATATAATGCTGCAGTCTGATCAGTTTGATGATTTTTCTGGGCAAACGGAAGACATCGACG  
AGTGCCAAGACAAAGAGAAATACGGATGCTACGGAGACTGCACAAATACGATAGGAGGGT  
ATACTTGCTTATGCCCTCGGGGACTATTGGAATGTCCACGAGAAGAATGTTTGCCGCC  
CTAAGGACAAGTTACGTTTGTCTCAAGGCTGTTACAGGTAATTAATGATCGAACTAAC  
CCATCATGTATGCAATTATCTTAACTTTCAATGGTTTTAGTCTGCAATTTCTTCTTAAAA  
TTAGCCTATGTATATGCAACGTTATGATTAGGGTTGGCCTCGGCGTGTTTCTGTCGGTG  
TTCATGGCATTCTGGCTCCGCCTTAGGCTTCAGAAGAGGAACTCATCAGAACGAGGCAA  
AAGTTCTTTGAGCAAAACGGTGGAATCTTTCTGCAACAGCAGATGCGTTCTATGGTGGC  
GCTGGCGGTGGAGTGGGTGGGTTCAAGATTTTCTCCACGGAAGAATCAAGAATGCGACC  
AACAACCTTCGAGTTGATCGCATTTCTGGTCTATGGAGGGCATGGCATTGTTTACAAAGGC  
GTCCTGGAGGACAACACGGTGGTGGCCATCAAGAAGTCAAAGATGATGGAGGAGGCCCAA  
ACCAAGGAGTTTGCAAGAGAAATGTTTCCTCTCCCAGATCAACCATCGAAACGTCGTC  
AAGCTGCTTGGATGTTGCCTTGAAGTTGAAGTGCCTATGTTGGTCTATGAATTTGTCTCA  
AACGGTACCTTCTACCACTACATCCATGGCAAAGACCCCGAAGTTGACATAGCACTTGAT  
ACCCGTCTTCGGATAGCGGCAGAGTCTGCCGAGGCGCTCTCCTACATGCATTGTCGGCT  
TCACCACCAATCCTCCATGGTGATGTCAAGACAGCAAAACATCCTGCTTGATGATAAGTTC  
AACGCCAAAGTTTCAGATTTTGGAGCATCAAACTAGCACCACTGATGAGGCTGAGATT  
GCAACATTGGTGCAAGGAACCTGTGGATACTTGACCCCGAATACCTAATGACATGCCAG  
CTGACCGATAAGAGTGACGTATATAGTTTTGGTGTGTCGTGCTGGAGCTTCTAACAAGA  
AAGAAGGCATTATACCTTGACGGACAGAGGAAGACAGGTGCCTGGTGTCTATGTTTACC  
ACAGCTGTGAAGGTTGGTGTCTCAAGAGCTTCTGGACAGCCAAGTAAGGAATGAGCTG  
AGTGACGAAATGCTCAAGAGATTACATACCTCCTAATGAGATGCCTAAGCATGATTGGG  
GAAGAAGCAGCGGCGATGAAAGAGGTAGCTGAGAGGCTGGAATCGCTGAGAAGATATCAG  
CAGCACCTTGGGCTAAAGCTGAAGGCAATGAGGAGGAGATTGAGAGCTTGCTCGGCATG  
GAACAAAATAATGCAATTACCAACTCAGGCAACAAGATGTCCTGGGTCTGGAAGAAGGC  
AATGCATATACATTTAGCTTATAG

>OsWAK22, 2477.t00012, Chromosome 2, post-processing  
ATGGCTACCACTACCCTGTGCCTGCAGGGTGCGGCCCTCGTCTGTTGATCGTCTGCCTG  
GCGCCGGTGGCACCAGCGTGGGCTCAGCAGCCGGCGGGCTGCCCGACAAGTGCGGGAAC  
ACCAGCATCCCCTACCCATTGGCATTGGCTCCCGCTGTGCCCGCGACTTCAACTTCCGG  
CTCGTTTGCAACCACGCCTACTCGCCTCCGCGCCTCTTCTGTGTCTGAAGTCGAGCTGGTT  
AGCCTGTCCCTCGACGGCGAGGCCCGGGCCCTCATCAACGCCAGAACTATTGCAGCGAC  
GGCACAACCTACATCAGTTACAATGCTTTGAGGAGGGACAGCCAGGGCCAGCTGCCGTTG  
TCTGATGTGTCTTTTCGGCCGTAGCACCGCCTACCGCTTCTCCGCGGCGAGGAACAGGTTT  
GTCGTGCTCGGTTGCCCCGTCTCGGTTACCTGGTTGACGCCGAGGAGTACTATGTCAGC  
GGCTGCATATCCATGTGCCGCAAGTCGCAAGCCGGTAATGATCACCTGCCTTACATCCTC  
AGCTTGAATAAGTCGGCAGAGGAGAACC CGGTGGAACCCATCTACCATCGCCTCAACTCG  
ACGGCATGCAATTACATGTTTCTGGTGGAGGACAAGTGGATCGACACCACGTACAGCTAT  
CGGCCTACTTCAACCGAACCGACGACTTCGACGTGCCCGTCTGCTCGACTGGGCGATT  
CGGAACGTCCGCAACTGCAGGGTCGCCAAGCGCAACGCCACCAAGTACGCGTGCCGGAGC  
GAGTGGAGCGAGTGCTTCGACGCCAGCGACGGCGTCGGATACCGGTGCAGGTGCTCCAAT  
GGCTACCAGGGTAACCCCTACCTCGACAGCGGATGCACAGACATCGACGAGTGCCAAGAC  
AAAGAGAAATACGGATGCTACGGAGACTGCACAAATACGATAGGAGGGTATACTTGCTTA  
TGCCCTCGGGGACTATTGGAATGTCCACGAGAAGAATGTTTGCCGCCCTAAGGACAAG  
TTCACGTTTGTCTCTCAAGGCTTACAGGGGTTGGCCTCGGCGTGTTTCTGTCGGTGTTT  
ATGGCATTCTGGCTCCGCCTTAGGCTTCAGAAGAGGAACTCATCAGAACGAGGCAAAAG



OsWAKs-Supplemental Data 1[1].txt

TTCTTTGAGCAAAACGGTGAATCTTTCTGCAACAGCAGATGCGTTCCTATGGTGGCGCT  
GGCGGTGGAGTGGGTGGGTTCAAGATTTTCTCCACGGAAGAACTCAAGAATGCGACCAAC  
AACTTCGCAGTTGATCGCATTCTTGGTCATGGAGGCATGGCATTGTTTACAAAGGCGTC  
CTGGAGGACAACACGGTGGTGGCCATCAAGAAGTCAAAGATGATGGAGGAGGCCAAACC  
AAGGAGTTTGAAGAGAAATGTTTCATCCTCTCCAGATCAACCATCGAAACGTCGTCAAG  
CTGCTTGGATGTTGCCTTGAAGTTGAAGTGCCTATGTTGGTCTATGAATTTGTCTCAAAC  
GGTACCTTCTACCACTACATCCATGGCAAAGACCCCGAAGTTGACATAGCACTTGATACC  
CGTCTTCGGATAGCGGCAGAGTCTGCCGAGGCGCTCTCCTACATGCATTGTCGGCTTCA  
CCACCAATCCTCCATGGTGATGTCAAGACAGCAAACATCCTGCTTGATGATAAGTTCAAC  
GCCAAAGTTTCAGATTTTGGAGCATCAAACTAGCACCAACTGATGAGGCTGAGATTGCA  
ACATTGGTGCAAGGAACCTTGTGGATACTTGGACCCCGAATACCTAATGACATGCCAGCTG  
ACCGATAAGAGTGACGTATATAGTTTTGGTGTGTCGTGCTGGAGCTTCTAACAAGAAAG  
AAGGCATTATACCTTGACGGACCAGAGGAAGACAGGTGCCTGGTGTGTCATGTTTCACCACA  
GCTGTGAAGTTGGTGTGTCATCAAGAGCTTCTGGACAGCCAAGTAAGGAATGAGCTGAGT  
GACGAAATGCTCCAAGAGATTACATACCTCCTAATGAGATGCCTAAGCATGATTGGGGAA  
GAACGACCGGCGATGAAAGAGGTAGCTGAGAGGCTGGAATCGCTGAGAAGATATCAGCAG  
CACCTTTGGGCTAAAGCTGAAGGCAATGAGGAGGAGATTGAGAGCTTGTCTGGCATGGAA  
CAAAATAATGCAAATTACCAACTCAGGCAACAAGATGTCCTGGGTCTGGAAGAAGGCAAT  
GCATATACATTTAGCTTATAG

>OsWAK23, 2477. t00010, Chromosome 2, pre-processing  
ATGACTACCAAGTGCCTGCATCTGCAGGTGCTTGCCTTAACCGTCTTCTCGTCTGCGCG  
GCGGCAGTGACACCAGCGGCGTGGCTCAGCAGCAGCAGCTGCCGGGCTGCCCCGACAAG  
TGCGGCGACATCAGCATCCCTTACCTTTTCGGGATCGGCGCCCCGCTGCGCCCGCGACCAA  
TACTTCGAGCTCGAGTGCAACCGCGCCTACTCCCTCCGCGCCTCATCGTGTCTACCCAC  
CGGCAACATCTGGTCAACCTGTCCCTCGCCGACGGGAGGCTACTGCCCTCATCAACGCC  
AGACGCCAGTGCTACAACAGCACGAGGGGTTTGTATCGGTGATGCCAATAATTATGTCAAC  
AAGGATATCACTCTTGTGCGCAGCAATGCCTACCGCTTCTGCGGCGAGGAACCGCTTC  
GTCGCGCTCGGCTGCCCAAACATGGGCTACTTCGTGACACCTACGGCTACTACGTGAGC  
GGTTGCACGTCCATCTGCCGGCCATCGCAGGGGAATGGTGCAGTGGTGCCTCGACCGGG  
GGATGCACCGGCGAGGGATGCTGCCAGAGCAGGATACCGACCAATACCGACTACTACGAG  
CTGTACGTTCAAACCTTTCAAACAGGGGAAGGGGACCCCATATTACGTGGCGGTACGACT  
GCTTGGCCGTTACGTGTTTCTGGCGGAGGACAAGTGGATCGACACCACCTACCGCGGCCAC  
CCGGACTTCGACCGAAACGACGACTTCGCGGTGCCCGTCTGCTCAACTGGGCCATCCGG  
AACGTGCGTAACCTGCAGCGCCGCTACTCGTAACATGACGGACTACGCGTGCCGGAGCGTC  
AACAGCCACTGCATCGACTCCATTGATGGCCCCGGATACCGATGCAACTGCTCCCAGGGC  
TACGAGGGAAACCCCTACCTTGACGGTGGATGCCAAGGTAACCAATTAACCAACCTCC  
CATTAAATAAAGGAGAATTTGAACCATGCCACACAAATTTTGAACCAATTTATGATATAC  
CACCTGACCTACGTGCTTGAATGACTCATGTGGGTCTACATGTCATTGAGATACGAGTGG  
TATATCTTAAATTTTGAACATATAGGGTGGCATGGTTCCAACAAACCTTAAATAAACT  
AGCATGGTGACCCGAGATTGCGCGGCTAGCATCATTGTATTTTCTCTCATATAATAGCA  
TATATGTTTTCTCATTATATTATTCAAATATATTAATGACAACATAATTTTAAATTTT  
GCAATAACTTTATAAACCTACTAATGTGTAATATTCATATTATATTTATATACGTGTTA  
GTTATTAATTTATTTTAAATCAAAATTTAGTTATTTGTAATTTATATATTTCTATAT  
GGACTCTAGACTCGTCTTTTAAATTTTGTTTTTTAAATCCGAATTTTCTGTAAATTGTA  
TTTCTATATAGACTCTATGCTCTTCTCCCATATTATTTATTTTATTTTCTGAAATTTTG  
TTATTTCTAATTGATTTCTATGTGGACTCTAAACTCATCTTTCAATATTCTTTAATTTT  
TAATTTTCAATTTTCAATTACTTCTAAATTTGATTTCTATATTGACTTTAAATTTCTTCTC  
TCATGTTTTCTTAATTTTCAATTTTAGTTATTTGTAAATTTATTTTATACGGACTCAA  
AACTCTAATTTTAAATTTTATTATGTTTATTTCCAAATTTTAGTTAGTTTAAATTTCTATA  
TGGACTCTATACTCTACTTCTAATATTCTTACTTTTTAATTCCGAATTTCTATTTTTTT  
TCTTAATTGATTTCTATATGGACTCTATACTCTACTTCTAATATTCTTATTTTTAATT  
CCAAATTTCTATTATTTTCTAATTGATTTCTATATGGACTCTATACTCTACTTCTAATA  
TTCCTTATTTTTAATTCCGAATTTTCAATTATTTCTAATTGATTTCTATATGGACTCTA  
GTCTCTCTCTTAATATTTCTTATTTTAAATTTTCAATTTTCACTATTTCTAATTTGTA  
TTTCTATATGGACTCTAGTCTCTCTCTAATATTCTTATTTTCTAATTTCCGAATTTCA  
GCTATTTCTAATTTGATTTGTATATATGGACTCTGCTTTTTCTTTTTCTTCGATTAATG  
TGAGAATTTTTAGGCCATGAGAGCGAACGTGGAGGCTCATTTTTCTATTCCTTTAATAAT  
ATAACTAGCATGGTGGCCCGCACAGATTGCGCGGCTAGCATCATTATATTATCTCTCATA  
TAATAGCATATATGTTTTCTCATTATATTATTCAAATATATTAATGACAACATAATTT  
GAAATTTTGAATAACTTTACAAAATATTAATGTGTAATATCCATATTGATTTTATAT  
ACTTGTGTTAGTTAATTTTAAATTTTAAATTTTAAATTTTAAATTTTAAATTTTAAATTT  
ACCTATATGGACTCTAGACTCGTCTTTTAAATTTTCTTTTTTTTAAATTTCCGAATTTTCC

## OsWAKs-Supplemental Data 1[1].txt

GTAAATTGATTTCTATATAGACTCTATGCTCTTCTTCCAATATTATTTATTTTATTTTC  
AGAATTTTGTATTCTAATTGTATTCTATGTGGACTCTAAACTCATCTTCAATATTC  
TTTAATTTTAAATTCGAATTTCAATTTACTTCTAAATTGTATTCCTATATTGACTTTAAA  
TTCTTCTTCTCATGTTTTCTTAATTTCGAATTTAGTTATTTGTAATTTGATATTTTAT  
ACGGACTCTAAACTCTACTTTTTAATTTTATTATGTTTTATTCCAAATTTTAGTTAGTTTTA  
AAAATCCTATTTGGACTCTACACTCTACTTCTAATATTCCTTATTTTTTAAATCCGAATT  
TCTATTTTTTCTTAATTGTATTTATATATGGACTCTATACTCTACTTCTAATATTCCTTA  
TTTTTAATTCCAAATTTAGTTATTTTCTAATTGTATTTCTATATGGACTCTATACTCT  
CTTCTAATATTACTTATTTTTAATCCGAATTTAGTTATTTTCTAATTGTATTTCTATA  
TGGACTCTATACTCTACTTCTAATATTCCTTATTTTAAATCCGAATTTTCAAGTTATTTCC  
TAATTGTATTTTTATATGGACTCTAGTCTCTCTTCTAATATTCCTTATTTTTTAAATCT  
GAATTTCAACTATTTCTAAATTGTATTCCTATATGGACTCTAGTCCCCTATTCTAATAT  
CCTTATTTTTTAAATCCGAATTTAGTTATTTCTAATTTGTATTTCTATATGGACTCTAC  
TTTTTCTTTTTCTCTGATTAATGTGAGAATTTCTAGGCCATGAGAACGAACGTGGAGGCT  
CCTTTTTCTATTTCTTTAATAATATAATAGATAGATTATTTCTCATGTGAGTTTAAAA  
GCTAATTCCTGTTGATTGGGTGATTTGCGAAGATACAACGAGTGCAGCGCCAGATA  
AGTACGCATGCTTCGGCGAGTGCACCAACACGCTAGGATCGTACTCGTGCATGTGCCCGC  
GAGGTGCTCGTGGTGACCCGTCCATTCCACAAGGCTGCCTCGAAAAGGACAAGTTCATT  
TAGCTCTGAAAGTAGTTACAGGTGAAAAATTATAACTGTCGTCCATCATGGCAACACCAA  
TGCACCTTTTTTCTCTCTCTCTCTCTCGCTCTAATGATTCCTCGATTTCTGATGAGTGA  
CATCTTCAGGGGTGAGTTGGTGTCTTCTCGCCACTGCTCATGTACTTTTGCCTATACC  
TAGTTCTCCAGAAGAGGAAGCTCATCAGAAACAAGCAAGATCTTTGAGCAAAATGGGG  
GAGTGATCCTCCAGCAGCAGATGCACCTCTGGCGGAGGTGCTGGTGGATTCAAGATATTTCT  
CCACGGAAGAGCTTGAGAAGGCCACCAACAACCTTTGCTGATGACCGTGTCTCGGTGCGG  
GTGGTCACGGTGTGTCTATAAGGGTGTCTGGAGGACAACATGGTGGTGGCCATCAAGA  
AGTCGAAGATGATGGAGGAAGCCAGACTAAGGAATTCGCGAGAGAGATGTTTCATCCTCT  
CCCAGATAAACCACAAGAATATCATCAAATTTGCTCGGTTGTTGCCTCGAAGTCGAAGTGC  
CCATGCTGATCTATGAGTTTGTCTCAAATGGAACACTCTACCACATACATGGCAAGG  
AACCCATAGCTCACATATCACTTGATACCCGTCTCGGATAGTAGCAGAGTCAGCCAAGG  
CACTCTTCTACATGCACTCGTCTGCTTCACCGCCAATCCTCCATGGAGATATCAAGACAG  
CAAACATCCTACTTGATGACAAGCTCAACGCCAAAGTTTCAGATTTTGGGGCATCAAAAC  
TAGCAACAGCTGATGAGGCCGAGATTGCAACGTTGGTGCAGGGAACCTTGGGGTACCTAG  
ATCCTGAATACCTAATGACTTGGCAACTGACCCGATAAGAGTGACGTTTACAGTTTGGTG  
TCGTGCTGCTAGAGCTTCTAACCAGGAAGAAGGCATTGTACTTGGATGGACGAGAGGAAG  
ACAGGAGTCTGGTGTGATGCTTCATCACAGCAGTGAAAGCTGGTGTGTCATCAAGAGCTTC  
TGGACAACCAGGTAAGGAATGAGATGAATGAAGAAATGCTCACAGAGATTGCACACCTCC  
TGATGCGATGCCTAAGTATGAACGGGGAAGAACGACCGACGATGAAGGAGGTAGCGGAGA  
GGCTGGAGATGCTGAGGAGATACCCAGCAACATCCTTGGGTTGAAGCTGAAGGTAATGCCG  
AAGAGAATCAGAGTTTGTATGGCATTTGAACAACGGAATTCAAATTTACCAACTCAAGCAAC  
ATGATGTTCTTGATCTAGAAGAAGGAAGTACATATACATTTAGCTTGTAG

>OsWAK23, gi|32993763|dbj|AK108554.1| *Oryza sativa* (japonica cultivar-group) cDNA clone: 002-144-E09, full insert sequence

AATGACAGAAATGACTACCAGTGCCCTGCATCTGCAGGTGCTTGCCTTAACCGTCTTCTCGTCTGCGCG  
GCGGCAGTGACACCAGCGGCGTCGGCTCAGCAGCAGCAGCTGCCGGGCTGCCCGACAAGTGCGGCGACA  
TCAGCATCCCCTACCCTTTTCGGGATCGGCGCCCGCTGCGCCCCGCGACCAATACTTCGAGCTCGAGTGCAA  
CCGCGCCTACTCCCCTCCGCGCCTCATCGTGTCTACCCACCGGCAACATCTGGTCAACCTGTCCCTCGCC  
GACGGGAGGCTACTGCCCTCATCAACGCCAGAGCCAGTGCTACAACAGCAGCGAGGGTTTGATCGGTG  
ATGCCAATAATTATGTCAACAAGGATATCACTCTTTGCGGACGAATGCCTACCGCTTCTCTGCGGCGAG  
GAACCGCTTCGTGCGGCTCGGCTGCCCAAACATGGGCTACTTCGTGACACCTACGGCTACTACGTGAG  
GGTTCACGTCCATCTGCCGGCCATCGCAGGGGAATGGTGCGAGTGGTGCCTCGACCGGGGGATGCACCG  
GCGAGGGATGCTGCCAGAGCAGGATACCGACCAATACCGACTACTACGAGCTGTACGTTCAAACCTTCAA  
ACCAGGGGAAGGGGACCCCATATTACGTGGCGGTACGACTGCTTGCCGGTACGTGTTTCTGGCGGAGGA  
AAGTGGATCGACACCACCTACCGCGGCCACCCGGACTTCGACCGAAACGACGACTTCGCGGTGCCGTGCT  
GCTCAACTGGGCCATCCGGAACGTGGTAAGTCAGCGCCGCTACCCGTAACATGACGGACTACGCGTGC  
CGGAGCGTCAACAGCCACTGCATCGACTCCATTGATGGCCCCGGATACCGATGCAACTGCTCCAGGGCT  
ACGAGGGAAACCCCTACCTTGACGGTGGATGCCAAGGGCATCAGGCGAGTGGACCGGTTTTGACCAGGCA  
GACTGCACAGTTTCAAGGAATCCTGGGAGCCTTATCCAGTATTTTTCAAACCTGAAAAGGTTGCATTTAG  
GCCTAGAAGGGTTTGCAGTTAGCAGCAGAGGACAATGGTCTGAGACCATCGTAGAGATAGCTGAAAGCAA  
GCAATTTTGGAACTTTTCTTCCCACTCATGTGAGCAAAACACCCTGTCAATTTTTGTTAAGGTTGGTATT  
TCTGTTTTCGTGGATCAGGTGTATCGAGCGCCATTTAGTTTTATTTCAATAACTTCCAACATGTTTTAAG  
CCGCTTTAAAAGACTGCATCATGCCCTGTTAAGATTGCTGTTATTTTTGTGCGAGTCTGGACAATGAG  
GTTGAAATCATCTAAGATCATCCACTTTTGATTT

# OsWAKs-Supplemental Data 1[1].txt

```
>OsWAK24, 4897.t00005, Chromosome 2, pre-processing
ATGGCTACCAATACCCTGCACCTGCAGGCGATTGCATTAGCAGCAGTCTTGCTCATCTGT
CGCCTTTTCGCCGGTGACACCAGCAGCGTCGGCTCAGCAGCTGACAGGCTGCCGCGACAAG
TGCGGAAACATCAACGTTCCCTACCCCTTCGGCATCGGCGCCCGCTGCGCCCGCGATGAA
GGCTTCCAGCTCAACTGCGACGACAGCGCGTCGCCACCGCGCCTACTCACGCTTCAGTTC
GAGCAACACCCGCAGCTCGTCAGCCTGTCCCTGGCCGATGGCGAGGCCCGGGTCTCTCTC
AAACCGGAAAGCAAGTGCTACCCTCCTCCAGAAGAGAGGTCTCCGACGTCCCCACCTCC
TCGTACACGTCCATCAACGGCAGCACCACCTACCGCTACTCGCCGGAGAAGAACCGCCTC
GTCGCGCTCGGCTGCCCCAACCTCGGCTACATCGTCGACGGCTCCGGCAACTACGTCAGC
GGCTGCATGTCCGCGTGCCGCGCCCGCTCGCTGGGCAATGATACAGTGCCGCGGTTGCCG
GGGCGGTGCACCGGCGAGCGGTGCTGCCAGAGCATCATACCACCTACCCTCAACTTCTAC
GTGCCGCGGATGTTCAACTTCGAGAACGGGACGGCGGGCGGTGGACAACGAGCTCCGCGGC
GGCAGCAGCGCGTGACGGTACGTGTTCTGGTGGAGCACACCTGGATCAACACCGTGTAC
AACGACACGAAGGATTTCAACCGGAGCGACTTCGAGGCCGTGCCCGTCGTGCTCGACTGG
GCAATCCGGAACGTCTACAACGTCAGCGCCGCCAAGCGCAACGCGACGGACTACGCGTGC
CGGAGCACGAACAGTGAGTGCTTCGACACCATCGACGGCCAGGGCTACCGGTGCAACTGC
TGCCAGGGCTACGAGGGCAACCCCTACCTCGACGGTGGATGCACAGGTAGCAGTCATCTT
AATTAACCTCTGTCAATTAATTTCCATAGATTAATTTGGCTGATGATCAAATATGACGAAA
TTAATTGCTTTGTGAATGGAAGATATCAACGAGTGCTTACGTCCGAAAAGTACGGATGC
TACGGAGACTGCACAAACATGTTAGGAAGTCACACTTGCCTGTGCCCTCCTGGGACTAGT
GGAAATTGGACCGACAGGAACGGTTGCCGCCCAAAGGACAACCTCCCTTTAGCTCTTAAA
GTAGTTACAGGTAAAAAAATTATAACTGTCGTCCATCATGAAAAATTACATTCAGTCTC
AAAAATGGAATCTAACGGAGTAATATTGGGTATACAATGGCGTCTGTGTTACAGGGTTAG
CGTCGGTGTCTTCTTGTGCTGTTTCTGCTGCTTCTGGCTCTACTTGGGGCTCCAGAAGAG
GAAGCTCATCAGAACAAGCAGAAGTTCTTCGAGCATAACGGTGGAGTGATCCTCCGGCA
GCAGATGCACTCCGGCGGAGGCACCCATGGGTTGAGGATATTCTCGACAGAAGAAGTCAA
GAGGGCGACCCACAACCTTCGCTCTGACCGTGTCTGGGTGCTGGTGCTACGGTGTGTG
CTATAAGGGCGTCTCGAAGACAAGACAGTAGTGGCCATCAAGAAGTCAAGATGATGGA
GGAGGCCGAGACCAAGGAGTTTGCGAGAGAAATGTTTCATCTCTCCCAAATCAACCATCG
GAATGTCGTCAAAGCTGCTTGGTTGCTGCCTCGAAGTTGAAGTGCCCATGTTGGTCTATGA
ATTCGTCTCAATGGCACCTCTACCACTACATCCATGGCAAGGAACCCAAAGCTGACAT
ACCACTTGATACCTCGTCTTCGGATAGCGGCAGAGTCAGCCGAGGCACTCTCTACATGCA
CTCATCGGCTTCACCCCCAATCCTCCATGGAGATGTCAAGACGGCAAACATCTTGCTTGA
TGACAAGTTTAACGCCAAAGTTTTCTGATTTTTGGGGCATCAAAGCTAGCACCAACTGATGA
GGCCGAGATTGCAACGTTGGTGACGGGAACCTTGCGGGTACTTGGACCCCGAATACCTTAT
GACATGCCAGTTGACTGATAAGAGCGATGTTTACAGTTTTGGTGTGCTCATGCTAGAGCT
TCTGACAAGGAAGAAGCATTGTACTTGGACGGCCAGAGGAAAACAGGAGCCTGGTGTC
ATGCTTACCACAGCAATGAAAGTTGGTCCCATCAAGAGCTACTAGATAGCCAAGTAAG
GAATGAGATGAGCGCTGAAATGCTAGAAGAGATCACATACCTCCTGATGCGATGCATAAG
CATGAATGGAGAAGAACGGCCAACGATGAAAGAGGTTGCTGAGAGGCTGGAGATGTTAAG
GAGATACCAGCAGCACCCATGGGCTGAAGCTGAAGACAATGCAGAGGAGATTGAGAGCTT
GCTCGGCAGGGAACAACAGAATGCAAATTACCAACTCGAGCAACAAAATGTCTTGATTT
GGAAGAAGGCCGTAACATATACATTTAGCATGTAG
```

```
>OsWAK24, 4897.t00005, Chromosome 2, post-processing
ATGGCTACCAATACCCTGCACCTGCAGGCGATTGCATTAGCAGCAGTCTTGCTCATCTGT
CGCCTTTTCGCCGGTGACACCAGCAGCGTCGGCTCAGCAGCTGACAGGCTGCCGCGACAAG
TGCGGAAACATCAACGTTCCCTACCCCTTCGGCATCGGCGCCCGCTGCGCCCGCGATGAA
GGCTTCCAGCTCAACTGCGACGACAGCGCTCGCCACCGCGCCTACTCACGCTTCAGTTC
GAGCAACACCCGCAGCTCGTCAGCCTGTCCCTGGCCGATGGCGAGGCCCGGGTCTCTCTC
AAACCGGAAAGCAAGTGCTACCCTCCTCCAGAAGAGAGGTCTCCGACGTCCCCACCTCC
TCGTACACGTCCATCAACGGCAGCACCACCTACCGCTACTCGCCGGAGAAGAACCGCCTC
GTCGCGCTCGGCTGCCCCAACCTCGGCTACATCGTCGACGGCTCCGGCAACTACGTCAGC
GGCTGCATGTCCGCGTGCCGCGCCCGCTCGCTGGGCAATGATACAGTGCCGCGGTTGCCG
GGGCGGTGCACCGGCGAGCGGTGCTGCCAGAGCATCATACCACCTACCCTCAACTTCTAC
GTGCCGCGGATGTTCAACTTCGAGAACGGGACGGCGGGCGGTGGACAACGAGCTCCGCGGC
GGCAGCAGCGCGTGACGGTACGTGTTCTGGTGGAGCACACCTGGATCAACACCGTGTAC
AACGACACGAAGGATTTCAACCGGAGCGACTTCGAGGCCGTGCCCGTCGTGCTCGACTGG
GCAATCCGGAACGTCTACAACGTCAGCGCCGCCAAGCGCAACGCGACGGACTACGCGTGC
CGGAGCACGAACAGTGAGTGCTTCGACACCATCGACGGCCAGGGCTACCGGTGCAACTGC
TCCGAGGGCTACGAGGGCAACCCCTACCTCGACGGTGGATGCACAGATATCAACGAGTGC
TTACGTCCGAAAAGTACGGATGCTACGGAGACTGCACAAACATGTTAGGAAGTCACACT
```

# OsWAKs-Supplemental Data 1[1].txt

TGCGTGTGCCCTCCTGGGACTAGTGGAAATTGGACCGACAGGAACGGTTGCCGCCCAAAG  
GACAACCTCCCTTTAGCTCTTAAAGTAGTTACAGGGGTTAGCGTCGGTGTCTTCTTGTCA  
GTGTTTCATGTGCTTCTGGCTCTACTTGGGCTCCAGAAGAGGAAGCTCATCAGAACGAAG  
CAGAAGTTCTTCGAGCATAACGGTGGAGTGATCCTCCGGCAGCAGATGCACTCCGGCGGA  
GGCACCCATGGGTTTCAGGATATTCTCGACAGAAGAACTCAAGAGGGCGACCCACAACCTTC  
GCCTCTGACCGTGTCTGGGTCGTGGTGGTCACGGTGTGTCTATAAGGGCGTCCTCGAA  
GACAAGACAGTAGTGGCCATCAAGAAGTGAAGATGATGGAGGAGGCCGAGACCAAGGAG  
TTTGCGAGAGAAATGTTTCATCTCTCCCAAATCAACCATCGGAATGTCGTCAAGCTGCTT  
GGTTGCTGCCTCGAAGTTGAAGTGGCCATGTTGGTCTATGAATTCGTCTCAAATGGCACC  
CTCTACCACTACATCCATGGCAAGGAACCCAAAGCTGACATACCACTTGATACTCGTCTT  
CGGATAGCGGCAGAGTCAGCCGAGGCACTCTCTACATGCACTCATCGGCTTCACCCCCA  
ATCCTCCATGGAGATGTCAAGACGGCAAACATCTTGCTTGATGACAAGTTTAACGCCAAA  
GTTTCTGATTTTGGGGCATCAAAGCTAGCACCAACTGATGAGGCCGAGATTGCAACGTTG  
GTGCAGGGAACCTTGGGGTACTTGGACCCGAATACCTTATGACATGCCAGTTGACTGAT  
AAGAGCGATGTTTACAGTTTTGGTGTCTGTCATGCTAGAGCTTCTGACAAGGAAGAAAGCA  
TTGTACTTGGACGGGCCAGAGGAAAACAGGAGCCTGGTGTCTGCTTACCACAGCAATG  
AAAGTTGGTCGCCATCAAGAGCTACTAGATAGCCAAGTAAGGAATGAGATGAGCGCTGAA  
ATGCTAGAAGAGATCACATACCTCCTGATGCGATGCATAAGCATGAATGGAGAAGAACGG  
CCAACGATGAAAGAGGTTGCTGAGAGGCTGGAGATGTTAAGGAGATACCAGCAGCACCCA  
TGGGCTGAAGCTGAAGACAATGCAGAGGAGATTGAGAGCTTGCTCGGCAGGGAACAACAG  
AATGCAAATTACCAACTCGAGCAACAAAATGTCTTGATTTTGAAGAAGGCCGTAACAT  
ACATTTAGCATGTAG

>OsWAK25 9631.t01093, Chromosome 3, pre-processing  
TGGGAGATGCGGGGCGCGGCGGCTACTCCTGCCACTGGTGGTGTCTGCTGCTGCACGCA  
GCACGCGGATCAGCGGGATCGACGGGCGGCGGAGGCAACGGCAGCTGCACGCAGAGCTGC  
GGCCGCATGAGGGTGCCGTACCCGTTTCGGCTTCTCCAGAGGCTGCACGGTTTCAGCTCGGC  
TGCGACGACGCCTCCGGCACCGCGTGGCTCGGCGGGACGCGCGGGCTGGGCCTGCTCGTG  
AGCAACGTGACGCCGCGGCCATCGTCCTCACCTGCCCCCAACTGCTCCCGCCCGCTC  
AACGAGTCCCTGGATGCGCTCTTCACCGACAACCTACGCGCCACCGCGCAGAACGCCCTG  
GTCGTGAGCTCGTGCGACCCGCGAGGCCGCGCCCGCTCAGCAACTGCAGCATCCACCC  
GAGGCCCTACCTCGAGAAGAGCTGCAATTCATCCGCTGCGTCTTACCTTCTACCAAAGCC  
AACGTCGACGGGACAAACGTACAGACCCCTTCTTGAATAGAAGCGAGATGCGGCGGCTC  
GGCTCGGACTGCCGCGGGCTCGTGTGCGCGTCGATCTATTGCAACACGGCGGGGCGGCG  
CTGCAGCTGACCGCGCTGGAGCTGGATTGGTGGGTGCAGGGGCGGTGCGGCTGCTCGAGC  
CACGCCATCTGCGACGGGTTACCCCGCCGTCTACGCAGAAGGAGGCGTTCCGGTGCGAG  
TGCCAGGAGGGGTTTCGAGGGCGACGGCTACACCGCGGCGCGGCTTGCCGGAGAGGTGAG  
TACTCAGTATATTGGCTGGATAGTATCCACTGATTAGCTTCATTGCTCTACTTTTTTTCGT  
CCATTGATTTGGTCACTGCAAACTCTGCGAGCTAACTACTCTAGCCACTCGACCATAACCA  
TTAATCGTCCGGAGTAGACAGTACACAGTAGAGTAAGCATATCTTGTGCTTCGTTGACTA  
TACACCTAGCTAACACGACGCGCAAGACCAAGGATTGGACCAATGACCAATCAGCGTTAA  
AGATGAACGATTAACCTTGATCATCACTTGATTGAACAGCGAAAGGCTCTGCTTACCGGCC  
TTTCAAAGGAAAAAAAAAAGCCTCTGTTACTGGTAGGTGCGAGAGCGTTGCTATAACA  
TTCCTTGACAACCTGCAAGTGTCTCACTGGGTTCTCATACCGTCACACATGTAAAGCG  
ACTGGCAGTTCAAGCTAATTATTTTGGGTGGTTGCTGATGTCAAACCGTAATGTACTA  
CTTGCGCAAGTGACATAAGAGTATATTCGGTTATTTATTAGAGGATATGTAATCGATTTA  
AGTACTATCAGAACTTTTGTCTTCTACGACAAGTTGCTTGAATGTAGTGCCATTGATAT  
ATTAGATATTTTGAAGCTCTCGAAGAAATATTTTCTGACATGTTGGCTTTGATGCTTGC  
CTGCCTGCCTGCCTATGTGCTGAGGAATATTTGTTTCTTTTCTTTTGCCTGACATCCTATA  
TAGATGGTATTGAGTCCATAATTATTCATAAAAAACAAGAACAGTTGCTAAGAAAAATA  
CAGATCAACCAAGTGGGGTGTAGTTCCACCCATAGTTTTTGGTGTGCTGCTGCTTACC  
TTCTCTGTATGGCTTCATCCCTGGAAGAAGAATTTTCAAATCACTGCATAAATTATGTT  
GATTTTTCTCAATGTATGAAGTCACTTTGATATAATAAAGTTCTCGTTTGTTCCCTTC  
TTCCCTTTGAATCTCACACTAATGTTTGTCTTTTTCAGTTCCAAAGTGAATCCTTCAA  
AATACCTATCAGGATCATGTGGCAAGTTGGTTGAGATCGGCCTTCTTGTGGCAGGTAATT  
GCTTATAAATCTCGTGTGTTGTCAGAGAAAACAATATCTACTTTTGGCCAAAAGAGGTT  
GGAATTTGATTTTAGTAAAAATGCGTTGAGTTTGTCTCATCGATCTTACAAGTAGCATTC  
AGAAATTAAGACAGAGTATTTATGTAGGTTTGGCTTCATCCATAGAGAAACAGCTCGT  
CATACGTATGGCTACATGACTGATATTTAGGAGGATATGGTGCTAATATTATTTAGTATT  
TTGTTCTAAGAAAAAGTCCCTGAATTCCTACAAAAATCTAAAAACCGTCCTAAATATCT  
AAACCAGACACCAATTCAAGCGAACATTTCAAGACTTTGAGAGGACCCATGTAGCAAGT  
TCCTACAAATATTTGATGGAACCAATTAGTTTGGGAGCAATACATGTGTGAAATAG  
AGAATTTCAATGTTTCAAATCCAACTACTCTCCCATATTCAGATGATAAATGTATT

OsWAKs-Supplemental Data 1[1].txt

GATTTTTTTTTCTAAACCAAACCTTTTCAAATTTGACTAAGTTCATAGAAAAACAGAGTAA  
 CATTTCTAACACAAAATTGTAGATTTTCAATTAATAATTTGGTGTATAGATGTTGGTG  
 TGTTTTTATATAAATTTTATTGAACCTTGAATAGTTTGACTTGTAACAAAGTTAAAATGT  
 CTTATAATTTATTAATAATTGAGGGAGTAGCAACGAATGGGCCTTGAACCTAGACAGAGTT  
 AAGGCCAGATTAGAGAAAGTTTAAATTGTTTGGTAGTAGAGTTGAGGCGATTTCAAAT  
 TGGGCTGGTATCCGGACTAGAAAAATGGCCTTAGTCCCTTATCTTTTATTTAGTCTAGCA  
 GGCCAGATTTTTGGCTATTTTTCACTTCCTAACGATCTCCCGGCCTATTTGCTCGAAGCT  
 AAGCAACCACACCAACCAAAGCCACTAGGCTTTAACCGCAATTGTAATTGGATTGCATGA  
 TGGATTCTTTGCGCTCACACAATGCAGGAGTCTTTTTTGGAGCCATGGTGATGGGCATCA  
 CCTGCTTGGTGTACCACCTGCTGCGGCGCCGGTGGCGGCCCTCCGGAGCCAGAAGAGCA  
 CGAAGCGGCTGCTGTGCGAGGCGTCTGCACGGTGCCTTCTACACGTACCGCGAGATCG  
 ATCGCGCCACCAACGGCTTCGCCGAGGACCAGCGCCTTGGCACGGGCGCGTACGGCACGG  
 TGTACGCGGGGCGGCTGAGCAACAACCGCCTCGTGGCCGTGAAGCGGATCAAGCAGCGCG  
 ACAACGCGGGCTGGACGCGTGTGAACGAGGTGAAGCTCGTGTGCTGCGTGGTACGCCACC  
 GCAACCTCGTCCGCTCTCGGCTGCTGCATCGAGCACGGGACGAGATCCTCGTCTACG  
 AGTTCATGCCAACGGCACGCTGGCGCAGCACCTGCAGCGGGAGCGCGGCCCGGCCGTGC  
 CGTGGACGGTCCGCTCCGCATCGCCGTGAGACGGCCAAGGCCATCGCGTACCTGCACT  
 CGGAGGTGCACCCGCCATCTACCACCGCGACATCAAGTCCAGCAACATCCTGCTCGACC  
 ACGAGTACAACCTCAAAGGTGCGCGACTTCGGGCTGTGCGGGATGGGCATGACGTCCGTGC  
 ACTCGTCGCACATCTCCACCGCGCGCAGGGCACGCCGGGTACGTGACCCCTCAGTACC  
 ACCAGAATCTCCACCTCTCGGACAAGAGCGACGTGTACAGCTTCGGCGTGTGCTCGTGC  
 AGATCATCACGGCCATGAAGGCCGTGCACTTCAGCCGGGTGGCAGCGAGGTCAACCTGG  
 CGCAGCTGGCCGTGACAGGATCGGGAAGGCAGCCTCGACGACATCGTGCACCCCTACC  
 TAGACCCGCGACAGGGACGCTGCACTCTCACGTCCATCCACAAGGTGGCCGAGCTGGCGT  
 TTCGGTGCCTGGCGTTCCACAGCGAGATGAGACCTTCCATGGCTGAGGTGCGCGACGAGC  
 TGAACAGATTGAGTGCAGCGGTGGGCGCCGTCCACGGATGACGCCACATTCATGTCAA  
 CGACGTCTCGCTTTGCTGCTGCGCTCCATCACGTTGCACGGACAAGTCTTGGGGGACCG  
 CTAAGAGCAAGAGGCAGGCCGCGGCAACGCAGTGGTAAAGCAAGAGACGACGAAGTGTG  
 CAGTCGCGGACTCCCCGTGTCCGTGCAGGAGAGATGGTTGAGCGATAGGAGCTCCCCTT  
 CCTCAAATAGCCTGCTGAGGAATAGCTCCCTGAACCTCAATCAATGTCCTTGTGATG  
 GCATTTTAGGTGTAAGTAGCATTAGAACGATCTGTAATTGATGCAATGATCCCTTGTGCA  
 TCGATTGTGATGTTTATATCTGCAATATTGAATATGGGGTTATACGTCTGGT

>OsWAK25 gi | 32986899 | dbj | AK101690.1 | *Oryza sativa* (japonica cultivar-group)  
 cDNA clone: J03305912, full insert sequence

GATGGGAGATGCGGGGCGCGGCGCGGCTACTCCTGCCACTGGTGGTGTGCTGCTGCTGCACGCAGCACGCGG  
 ATCAGCGGGATCGACGGGCGCGGAGGCAACGGCAGCTGCACGCAGAGCTGCGGCCGATGAGGGTGCCG  
 TACCCGTTTCGGCTTCTCAGAGGCTGCACGGTTAGCTCGGCTGCGACGACGCTCCGGCACCGCGTGGC  
 TCGGCGGGACGCGCGGGCTGGGCTGCTCGTGAGCAACGTGACGCCGCGCGCCATCGTCTCACCTGCC  
 CCCCACCTGCTCCCGCCGCTCAACGAGTCCCTGGATGCGCTCTTACCGACAACCTACGCGCCACCGCG  
 CAGAACGCCCTGGTGTGAGCTCGTGCACCCGAGGCCGCGCCGCTCAGCAACTGCAGCATCCAC  
 CCGAGGCCTACCTCGAGAAGAGCTGCAATTCATCCGCTGCGTCTTACCTTCTACCAAAGCCAACGTGCA  
 CGGGACAACGTACAGACCCTTTCTGAATAGAAGCGAGATGCGGCGGCTCGGCTCGGACTGCCGCGGG  
 CTGCTGTGCGGCTGATCTATTGCAACCGCGGGGCGCGCTGACGCTGACCGCGCTGGAGCTGGATT  
 GGTGGGTGACGGGCGGTGCGGCTGCTCGAGCCACGCCATCTGCGACGGGTTACCCCGCGCTCTACGCA  
 GAAGGAGGCGTTCCGGTGCAGTGCCAGGAGGGGTTGAGGGCGACGGCTACACCGCGGCGCGGTTGC  
 CGGAGAGTTCAAAGTGAATCCTTCAAATACCTATCAGGATCATGTGGCAAGTTGGTTGAGATCGGCC  
 TTCTTGTGGCAGGAGTCTTTTTTGGAGCCATGGTGATGGGCATCACCTGCTTGGTGTACCACCTGCTGCG  
 GCGCGGTGCGGCGCCCTCCGGAGCCAGAAGACCAAGCGGCTGCTGTGCGAGGCGTCTGCACGGTG  
 CCCTTCTACACGTACCGCGAGATCGATCGCGCCACCAACGGCTTCGCCGAGGACCAGCGCTTGGCACGG  
 GCGCGTACGGCACGGTGTACGCGGGGCGGCTGAGCAACAACCGCCTCGTGGCCGTGAAGCGGATCAAGCA  
 GCGCGACAACCGCGGGCTGGACCGCTGATGAACGAGGTGAAGCTCGTGTGCTGCTGAGCCACCGCAAC  
 CTCGTCCGCTCCTCGGCTGCTGCATCGAGCACGGGACGAGATCCTCGTCTACGAGTTTATGCCCAACG  
 GCACGCTGGCGCAGCACCTGCAGCGGGAGCGCGGCCCGGCGCTGCCGTGGACGGTCCGCCTCCGCATCGC  
 CGTCGAGACGGCCAAGGCTACCGCTACCTGCATCGGAGGTGACCCGCCCCTTACCACCGCGACATC  
 AAGTCCAGCAACATCCTGCTCGACCAGAGTACAACCTCAAGGTGCGCGACTTCGGGCTGTGCGGATGG  
 GCATGACGTCCGTGCACTGCTGCGACATCTCCACCGCGCGCAGGGCACGCGGGGTACGTGACCCCTCA  
 GTACCACCAGAATTTCCACCTCTCGGACAAGAGCGACGTGTACAGCTTCGGCGTGTGCTGCTGAGATC  
 ATCAGGCCATGAAGGCCGTGCACTTCAGCCGGGTTGGCAGCGAGGTCAACCTGGCGCAGCTGGCCGTG  
 ACAGGATCGGGAAGGCAGCCTCGACGACATCGTGCACCCCTACCTAGACCCGACAGGGACGCTGGAC  
 TCTCAGTCCATCCAAAGGTGGCGAGCTGGCGTTTCCGGTGCCTGGCGTTCCACAGCGAGATGAGACCT  
 TCAATGGTTCAGGTGCGCGACGCTGGAACAGATTGAGTTCAGGTCAGCGGGTGGGCGCGCTCCACGGATGACG  
 CCACATTCATGTCAACGACGTCTCGCTTGTGCTGCTGCGGCTCCATCACGTTGCACGGACAAGTCTTGGG

GACCGCTAAGAGCAAGAGGCAGGCCGCGGCAAACGCGAGTGGTAAAGCAAGAGACGACGAAGTGTGCAGTC  
GCCGACTCCCCGTGTCCGTGCAGGAGAGATGGTTTCAGCGATAGGAGCTCCCCTTCTCAAATAGCCTGC  
TGAGGAATAGACTCCCTGAACATAACTCAATCAATGTCCTTGTGATGGCATTTTAGGTGTAAGTAGCATTAG  
AACGATCTGTAAATTGATGCAATGATCCCTTGTGATCGATTGTGATGTTTATATCTGCAATATTGAATA  
TGGGGTTATACGTCGTGGTC

Page 38

OsWAKs-Supplemental Data 1[1].txt

GAAATTGGGAATCTCGCACTATTATATAATCATATACTACATATATTATTTTTCTTCAAG  
CATATATTTTTGTATCGATGAGGTTATTCTGAAAGGAGCAAAATTATAATCCCGTAGTCTG  
GAACTTTGAAGCAGAGGATGTATTGTGAAAATCGTATAACAACCCAACATTATGCAATA  
TACAGATCATTAAAGGATTAAGTAATGGAACATTTCAAGGCCGATTTATCCATTATCTAAC  
AAGTAAAAAGTAAAAGAACTATTCATTCTTTCTCCAGAACATTGTTACGATGATGTC  
AATATATGTGCGTGATATTTTTCAAGTAAAAAAAATGTATCTCCAAGAACATTACATAAT  
TATTAAGTAAAAGATGTTCTCTTAGGTCCTTGAGAAGGTACAACAGTATATTATAATATT  
ATCTAGTATAATTTGTGATATTTTTACCTAAACACCAAGAAGGTTTCACAAATATGAAA  
AATTTAACACTAGAAAAATGAAAAATGAAGTGCCCTTACATTTCTCTCAAAAGCCTTATAAA  
AGCTAATTAACTTTTACCCGTCAGTTGTTGTCCAGACTGAGTCAACGTAAATCTTCTTTA  
TTATGAACCAAGTCAAAAACGCAAAATATTTAGGAGATACAAAATGATACAGGCAACAAA  
GTTGCCTCATTCTAGTTATGCATTGCTTGGCAATTAACACTACTTCATCAACCAATAAAC  
GTGCACATCCTTTTCACTGAGCTCACTTCAGGTGAACACATGGATATAGCTCTTCTTT  
TTTTTTTTCTTTTTTTTTTGGGGGGATATAGCTAAACAGTTGAAGAAGCCTTCAGTCA  
GGAAGAAAATCCATAACAGCATATATACTTCAAACCGTTTCTTTTTTTTTCTTAATTGGCT  
TGTCATGGTAATTAACCTTAATTTGACTTGGTTCACGATTCAATAATTCGTTAACACATT  
AATTTATGAGAAAAAAGGTAAGGAAGTTAGGAGAAGTTGCATTTTTACAATGGTAAGG  
TTGTTTTCATGATTTGCTCTTGTAACCTGACCCGCACAATTTTAACCGCCCCATTTTATT  
AGCTGTATCAGTAGAGCTCTACCTGATAGTTTTCTTTAGAAACAATTGTACGATGATTAA  
TTTTTACTTTTTCTAAACTTCTCTGCTATGTAGTTGACTTACATTTTTACAGCTCTACA  
TATTTTACTTCTACTATATATTGGCAGCCTAATCATACAAACGGGACTAAACCTAAGTCCC  
AGATTATAAGCAGTAACTGTAAACCAGAGATAGTAGAAAGATAAGCACTGTCTCACTGC  
TAACCAGGCAATTAACCTTCAGCAATTATGCAAGAAGCACCATCGACTCGATTTCTCCTG  
TTCATCTTCTACCTGACTGCAGTATCGTCTGCTCGTCCGGCGTCTCGTCCGGCGGCGGCGG  
GGACGCGCCATATCGCTGCCTGGGTGCCCCGACAAGTGCGGCGACGTCTCCATCCCCTAC  
CCGTTCCGGCGTCCGGCAGCGCTGCGCCGCCGTGGCCTCAACCCGTAATTCACATCACC  
TGCGACGACGCCGTGAGGCCACCGGTCCCGAAGCTGGGCGACCTGGCATGGAGGCCGAG  
GTCCTCGACATCACGCTGGAGCGCGGCGAGATCCGCCTCACCGGCTTCTCAGCTACGTC  
TGCTACACGTCGAGCAACAGCTCGTACGCCAGCCTCCCGGGCGGCATCTTCGTCCGGCGG  
ACGCAGCTCCGCGTCTCGCCGTGCGCGCAACCAGCTCACGGTGATCGGGTGACAGAGCTCTT  
GGCCTGCTGGTCCGGCGGCGCCACGCGGGCGGCTCCGGCGACGGCGACGAGTACGCCACC  
GGCTGTACACCTACTGCGCCAGCCTCAACAGCAGGACGCCGACGGCGCGCCCTGCGCC  
GGGACGGGGTGCTGCCAGGCGCCATCTCGTCCGACCTCGCTACGTCCGGCGGACGTTT  
CCGAGCAACTGGACGAACAGCGGTTGGCGCTTCAACCCGTGCTTCTACGCCCTTATCGCG  
GAGGTTGGGTGGTACAGCTTCCGGCGGCGCCACCTCGCCGGCGTCTTGGGTTCTGCAAC  
GAGACCAAGCCAGCGACATCCCCGTGCTCCTCGATTGGGCGGCCAGGGACGGCTGGTGC  
CCGGCGACGGCGGAGGAGAAGGCGCGGCGGAAGTACGCGTGCGTGAGCGGCAACAGCCAC  
TGCTCAACTCGAGCAACGGCATGGTTACTCGTGCAGCTGCAACCAAGGCTACGAAGGC  
AACCCCTATCTTGACAACGGCTGTCAAGGTACGATTCTTTTTACCGATGAGTACAAATGG  
TCAGTGGCTAACCCAGAATAAAATTACCAGAGAAGAGAATAGAGATCCTTATATGCTTAT  
AATCTACTTCTTTGTCCCCAAAATAAAAATCTAGGTAGGGATGGGACACCACCTAGGAC  
ATGTCCAGATTCTTTGTCTTAGGTGGTGTACATCCCCACCTAGATTGTTTTTGGGACG  
GACGGAGTAATTTATGAGTAATATAATAACTGATGTGACCTAAAAATACTTAGAAATAGT  
CAAATACTCAGTGTTTCAGAGACAACAGGTAATAATACATGTAGGAACGCCACTGGAAATGG  
TCTATAACTCTATTATCTTTTTATCTTTTTTTAACATCTGATGCTATCGTTTATATACAC  
GCGCACACTCATCTCTGCCTACTACTATCTACTATAAATTTAGATATAGACGAATGCAC  
GCTACGAAGACAGGGTGCCTAATACGAGGATGTATACCCATGCAAGCACGGTATCTGCAT  
CAATACACCAGGAAGCTACCGTTGCAAATGCAAGGCAGGAACAAAACAGATGGCACGAA  
TTTTGGATGCCAACAAAGTGCTCCCCATGGCTGCCAAAGTGATCATAGGTAAGACTACTAT  
CTCCAAATTAATTAATGGGTTGAATGTGTAAAACGGATTTGAGCAATTATTAATTTCTTT  
TACAACAATATTACTTCTATATTTTTTTAAGGAATGGATGATGCATGATGGAATTTAGAC  
GTCAGAGTTGCATCTTGTCAACCTTGAAATGTAATAAAGAAGTGCTACTAGACAAGTATG  
AGTAGTATTTAGAGTGTTTTGAATCCGTCCATCCCATATAAGCTTTATCAAAATAAGCTG  
TGTGACATCTCAAAATTTGATCCAGTAAATAAAAGTAAAAAATGGAGATGTGACAAGGA  
GATCCACTGATCTAATTTATGATTGTTTATTGAGACTAGCATAATATACAAATGGCC  
AAAAGGCGTCCCGGCACAGCCCGGCCAGGCACGGCTAACCATCGGGCTGGCATGGCCC  
GATCGGCACTTCGTGCCGGGCGGCGGCGGCCATGGGCTGCACCTCCTGCCAGGCATGG  
CCCACCAGCTGTCCGGCCGTGCCGTGCTGGCCCGAAGGCATGGGTGGCCACCGGGCCTT  
TTTTAAAAATAAGTCTATTTTTCTCCCTCCTTTTGGCTGTTACATATGTGTAGCTAAAT  
AAGTCAATTTTCCGTCCCTCCTTTTTGGCTGGCATATGTATAGAAAAATAAGTCTATTC  
TCCATCCCTCCTCTTTGGGTGACATATGTATAGATAAAAATAAGTCTATTTTACATCCTT  
ATTCTTTTATCATCATAGCATATAATATGTCTATTTTTTACTCCTCTATTTTTTTTTTTGTGA  
TCGGGCCTAGCTGTACGCCTATCGTGCCGTGCCGGGCGGGCCAGCTCAACGTGCCAGGA

OsWAKs-Supplemental Data 1[1].txt

GAGAGGCCTAGACACGGCCCGGTGGTTCGAGCCGGGCGGCACGGGCCCCGACCTCCGTCGG  
GCCGTGCCGTGCTTGGGCCGGGCCAAAATGCCGTGCCATGGGCCGGGCGGTCCGGCCCCG  
GACCTTTTGGCCATCTATAGCATAATACCAAGGAGTGTTTAGAAAAGAGCGTATGTCATC  
AACGTATTCTTTTTATTACTTACATACACCTGTTAAATGGGCCTTTTGGTCTCACAATCT  
CTTTATTTTTCTCCTTTAAAAAGTTGGTAGTTGGTGAGGGTGGAGTGGTAGATTCACCA  
CTTAAAGGTATGGGCTAATAAGTTCTATATGTTGATTTTTAAACGTCTTTACTATTAAAT  
TGACCAATGATTGATTCTTGTAATATAACTCTATATCCCATATATTTACTGGATTTAAA  
GTTTGTAGATTAATCGAGCGGTTTAAAATTGTATATTTTATTTAAAAATAGAAACGGAAT  
AATTTATTCAACTGTTATAATGTAATCCTAGATAGAGTTGTGCCAAACGTGACCTATTAG  
TCAATATCAGTGAAAGCACATTGAAATATAAAATTGTTGGTATGCATTTTATGCATTACA  
AATATTAACCTCAAGGTACATTTCTTTTTTAAAAAAGATTAATGGAAAGAGAGAACATA  
GGTGTGAACAAAACAAAGAACATACACCAATGATTGAAAAAAGTGACTGATAACTGATAA  
ATAGACACTCTCATAAGCAAAAATACGTAATTTGTTATTTTTAGATTAATAATCCCCCTT  
AAAAATGGAGAGTACGCCATAAACAAGTAAATAAACTTGTGACAGCTTTTTAATGATCCC  
TTCTCTTTTTCCCTATTTGCAATAATTCTCAGAAGTTGCAATAATTCTCACAAGTTAACA  
CAACATAATTAATCAACTGAATACTGCTAATTATTTTTTTTTCAGGGCTGAGTGCGTGTTC  
CATCTTCGTGTCATGGCTCTGTCATGCATGCTAGTAATCCAACCTGCAGAGAAGGAAGCACAC  
CATCGAGAAGCAGGAGTACTTCAGGCGAAACGGAGGCCTGAGGCTGTACGACGAGATGGT  
GTCGAGGCGAGGTCGACACGGTGCGCGTGTCTACCGTCGACGAGCTCAAGAAAGCCACCGA  
CAACTTCAGCGACGCGCGCGTCTCGGCCGCGGCGGCCACGGCAGGCTACCGTGGCAC  
GCTCGACGATCTCCGGGAGGTGCGCATCAAGAGGTCCAAGGCGGCGGTGACGCGGACGG  
CGACGCGGCGGCTGCAAGGAGGAGTTCGTCACGAGATCATCGTGTGTCGACGATCAA  
CCACCGCCACGTGTCGCGGTGCTCGGCTGCTGCCTGGAGGTGCACGTCCCGATGCTGGT  
GTACGAGTTCGTCCCAATGGCACCTGTTTCGACCTCCTCCACGGCGGGACGGCGGCGCG  
GCGGCGGCGCGGTGTCGCTGGGCCTCCGGCTGAAGATCGCGGCGCAGTCCGCGGAGGCGCT  
GGCGTACCTGCACTCGTCGCGCTCGCGCGCATCCTCCACGGCGACGTCAAGTCGCTCAA  
CATCTGCTCGACGGCGCGCTCGACGCCAAGGTGCGCGACTTCGGCGCGTCCGCGCTGAG  
GTCCGCCATGGGCGAGGGCGAGTTCGTTTCAGAGTACGTGCAGGGCACCTGGGCTACCT  
CGACCCGGAGAGCTTCGTCAGCCGCCACCTCACCGACAAGAGCGACGTGTACAGCTTCGG  
CGTCGTCTCGCGGAGCTCATCACCCGCAAGAAGGCGGTGTACGAAGACGACGGCGGCGG  
CGGCGGAGGCTCCGGCGAGAAGCGGTGCTGTGTCACGTTCTCGCGGCTCCAGCCG  
GGGTGAGCTCTGGAGAGTGGTGGACCGGACATCATGGACGGCGACGACGTGACGCGCT  
GGTCCGGGAGCTCGCGCGGCTCGCCGAGGAGTGCATGGGAGCGAGAGGCGAGGAGAGGCC  
GGCGATGAAGGAGGTGGCGGAGCGGCTGCAGGTGCTGAGGAGGGTGGAGATGATGGAGGC  
GGCCGCGAGGTGTTGAGGTGGTGGATGGCTTCAATGGAGGAGGATTAGTTGGGCGGATGG  
GCATCTGGACACCACGACGACGACGACGCTTATTACCAGAGCATGGAGACGGACAA  
GCTCCAGCTGGATGTTGATGATCTTGTACGCTAG

>OsWAK26, 4613.t00011, Chromosome 3, post-processing  
ATGGAGTCGTCGTCGTCGGTCATCTTCTGGGCACCGGCTGCTCCGGCGCGCTCCCCGAC  
GCCCGGTGCCTCATCCACCCGTCCACGCCGCGGTGCCCGTCTGCTCCCACTCCCTCTCC  
CTCCCGCGGAGCGAAACCCCAATTACAGGTGTAACACCTCCCTCTTGATAGATTACTGC  
CAACATGATGGAATCCATAAGTACATTCTAATCGATGTCGGCAAGACATTTAGAGAACAA  
GTTCTTCGGTGGTTTTCTCACCACAAGATTCCTTATGTTGATTTCGATTATTTCTCACTCAT  
GAACACGCGGATGCTGTCTTAGGTCTTGATGATGTTTGGGTGGTACAACCAAGTGGTTGT  
AGAAATGGCTTGGGCAAAGTTCCTATTTTTCTACCCATTTACAATGAACAGTGTGCA  
GCAAGATTCCCCTATTTATTGAAAAATAAGCTGGAGGAAGGTGATGAAGGTTCCCAAGTC  
ATTCAACTCGACTGGACGATAATTGAGGGTGACATCGACAAACCATTTGTATCATCAGGA  
TTAGAGTTTGTGCCCTGCCAGTCATGCATGGAGAGGATTATGTTTGTGTTAGGATTCCTA  
TTTGAAGGAGATCCAGAATTGCATATTTATCTGATGTCTCAAGAATTCTACCTAGAAT  
GAGCATGCAATTTCGAAGTCTGGTGCCGACAACTTGATCTTCTTATACTAGAAACGAAC  
GAGTTGCACGGGGAGGAGATGCTGGCAGTTGCCACCTTACTCTGAGTCAGACTCTTAAT  
GCTGTCAAGAGAATAAGTCTAAGAGAGCTCTGTTGATTGGAATGAACCATGAATTGAA  
CATCACAAGAAAAATCAGACGCTGGCAGAATGGTCTAGCAGTGAATCATTGTAGAACAT  
TTCAGGATTATACCTTTTGCTTGGTTTCAAAGGAAAAAGAAAGTTTCACTTGTTATCGTCG  
TCGTCCGGCGTCTCGTCGGCGGCGGCGGCGGCGGCGGCGGCGGCGGCGGCGGCGGCGG  
GACAAGTGCGGCGACGTCTCCATCCCTACCCGTTCCGGCGTCCGGCGACCGCTGCGCGCC  
GTCGGCTCAACCCGTACTTCAACATCACCTGCGACGACGCGGTGAGGCCACCGGTCCCG  
AAGCTGGGCGACCTGGCATGGAGGCCGAGGTCTCGACATCACGCTGGAGCGCGGCGAG  
ATCCGCTCACCGGCTTCTCAGCTACGTCTGCTACACGTGAGCAACAGCTCGTACGCC  
AGCCTCCCGGGCGGCATCTTCGTCGGCGGCGGCGGCGGCGGCGGCGGCGGCGGCGGCGG  
CAGCTCAGGTGATCGGGTGCAGAGCTCTTGGCTGCTGGTCCGGCGGCGGCGGCGGCGGCGG  
GGCTCCGGCGACGGCGACGAGTACGCCACCGGCTGCTACACCTACTGCGCCAGCCTCAAC



OsWAKs-Supplemental Data 1[1].txt

AGCACGGACGCCGACGGCGCGCCCTGCGCCGGGACGGGGTGCTGCCAGGCGCCCATCTCG  
 TCGGACCTCGCCTACGTGCGCGGGACGTTCCCGAGCAACTGGACGAACAGCGGTTGGCGC  
 TTCAACCCGTGCTTCTACGCCCTTATCGCGGAGGTTGGGTGGTACAGCTTCCGGCGGCGC  
 CACCTCGCCGGCGTCTTGGGTTCTGCAACGAGACCAAGCCAGCGACATCCCCGTCTGTC  
 CTCGATTGGGCGGCCAGGGACGGCTGGTGCCCGGCGACGGCGGAGGAGAAGGCGCGGCGG  
 AAGTACGCGTGCGTGAGCGGCAACAGCCACTGCGTCAACTCGAGCAACGGCATGGGTTAC  
 TCGTGCACTGCAACCAAGGCTACGAAGGCAACCCTTATCTTGACAACGGCTGTCAAGAT  
 ATAGACGAATGCACGCTACGAAGACAGGGTCGCCAATACGAGGATGTATACCCATGCAAG  
 CACGGTATCTGCATCAATACACCAGGAAGCTACCGTTGCAAATGCAAGGCAGGAACAAAA  
 CCAGATGGCACGAATTTTGGATGCCAACAAGTGCTCCCCATGGCTGCCAAAGTGATCATA  
 GGGCTGAGTGCGTGTTCCATCTTCGTATGGCTCTGTCTATGCATGCTAGTAATCCAAGT  
 CAGAGAAGGAAGCACACCATCGAGAAGCAGGAGTACTTCAGGCGAAACGGAGGCCTGAGG  
 CTGTACGACGAGATGGTGTGAGGCGAGGTGACACGGTGCGCGTGCTCACCGTCGACGAG  
 CTCAAGAAAGCCACCGACAACCTTCAGCGACGCGCGCTCTCGGCCGCGGCGGCCACGGC  
 ACGGTCTACCGTGGCACGCTCGACGATCTCCGGGAGGTGCGCATCAAGAGGTCCAAGGCG  
 GCGGTGACGCGGCGACGGCGACGGCGGCGGCTGCAAGGAGGAGTTCTGTCACGAGATCATC  
 GTGCTGTGCGAGATCAACCACCGCCACGTCTGCGGCTGCTCGGCTGCTGCCTGGAGGTG  
 CACGTCCCGATGCTGGTGTACGAGTTCTGTCCTCAATGGCACCCCTGTTGACCTCCTCCAC  
 GGCGGGACGGCGGCGCGGCGGCGGCGGCTGTCGCTGGGCTCCTCGGCTGAAGATCGCGGCG  
 CAGTCCGCGGAGGCGCTGGCGTACCTGCACCTGTCGCGCTGCGCGCGCATCTCCACGGC  
 GACGTCAAGTCTGCTCAACATCTGCTCGACGGCGCGCTCGACGCCAAGGTGCGCGACTTC  
 GCGCGCTGCGCGCTGAGGTCCGCCATGGGCGAGGGCGAGTCTGTTTCATCGAGTACGTGAG  
 GGCACCTGGGCTACCTCGACCCGGAGAGCTTCGTGAGCCGCCACCTCACCGACAAGAGC  
 GACGTGTACAGCTTCGCGCTGCTCTCGCGGAGCTCATCACCCGCAAGAAGGCGGTGTAC  
 GAAGACGACGGCGGCGGCGGCGGAGGCTCCGGCGAGAAGCGGTGCTGTCTGCTCCACGTTT  
 CTCGCGGCTCCAGCCGGGTGAGCTCTGGAGAGTGGTGGACCGCGACATCATGGACGGC  
 GACGACGTGACGCGCGTGGTCCGGGAGCTCGCGCGGCTCGCCGAGGAGTGCATGGGAGCG  
 AGAGGCGAGGAGAGGCGGCGATGAAGGAGGTGGCGGAGCGGCTGCAGGTGCTGAGGAGG  
 GTGGAGATGATGGAGGCGGCGCAGGTGTTGAGGTGGTGGATGGCTTCAATGGAGGAGGA  
 TTAGTTGGGCGGCATGGGCATCTGGACACCACGACGACGACGACGACGCTTATTACCAG  
 AGCATGGAGACGGACAAGCTCCAGCTGGATGTTGATGATCTTGTACGCTAG

>OsWAK27 9631. t04035, Chromosome 3, pre-processing  
 ATGTCGCTGCCCCGGCTGCCCGGACAAGTGCGGCGACGTCTCCATCCCCTACCCGTTTCGGC  
 ATCGGCGACCGCTGCGCCGCGCGCGGCTGAGCCGCTTCTTCAACCTCACCTGCGACGGC  
 TCGCGGTGCGCGCGCGGTGCCATGCTGGGTGACCCCGCGCGCCAGGCGGACGTATCGAC  
 TTCTCGCCGAGCGCGGCGAGTGCAGGCTCTACGCCGGCCTCAGCTACGCCTGCTACGCG  
 TCGTCGGCCACCTCCCGCTCCACCAACGCCACGTTGCGCTTCTCCCTCGTGGGACCCCG  
 TTCCGCGTCTCGCCGTGCGCGCAACCGGCTCACGGTGGTGGGTGACGCGCGCTGGGCTG  
 GTGGTGGCACCGCCAGCGGCGGCGGCGGCGACGACGACGACCTGTACGCCACGGGCTGC  
 TTCACCTACTGCGCGGAGCTGAACGCCGCGGGCGCGGACGGCGCGCGTGCGCCGGGGCG  
 GGGTGCTGCCAGGTGCCATCTCGCCGGACATCCCCTACCTCGGCGCGGCGTTCGCGACC  
 GGCAACTGGACGAACACCGCGTGGCGGTTCAACCCGTGCTTCTACGCCATGGTGGCGGAG  
 GACGGGTGGTACAGTTCCGGCGGCGGACCTCGTCGGCGTCTCGGTACTACAACGAG  
 ACCGTGGACGCGCGGCGTGGCGTCCCGTCTCATCGACTGGGCGGTGAGGACGGGTGG  
 TGCCCGGCGACGGCGGAGGAGAGGGCGCGGCGGAAGTACGCGTGCCTGAGCGGTAACAGC  
 TACTGCGTCAACTCGAGCAACGGCATGGGGTACACCTGCAACTGCTCCCGAGGCTACGAG  
 GGCAACCCCTATCTAGCCGGCGGTTGCCAAGGTATGTGTAATGTGTAATGGCCAAAATA  
 AAATTATGAATATACTCCCTCCGCATTTTAAATGTATAACGCCGTTAAATTTTAAACAAT  
 GTTTGATTATTCGTTTTATTTTATTTTCTATAAATATAAAATATTTATGTCATGCT  
 TAAAAAATATTTGATGATAAATCAAGTCACAATAAAATAAATAAATTACATAATTTTT  
 TTTAAAAAATAATGGTCAAATATTGATAAAAAATCAACGACGTCATACATTAAATAAC  
 TTTTTTTCTTTAGTATTTAACTATGGTTTGTTCATTTTGAACCAATCAACATCATCTAA  
 ATAAACTTTTTTTATTTTGTATAATAGTAGGAAGTTATAAATTAACATATAAAATTTAA  
 TTTGAAAAAGTATGAATATGAATTAACATATAAATTAAGTTTCATCTTGTGAGCTGCAGCA  
 AAAAAATACAATTAATTTATAGTTAATCTTCATGTTTTCCATGGTGTTTTATTTTT  
 AAGCATTGGCTTTACCTCGCTAAGAAGTCTTTGTTTTCCACAGCTTACTAGCCTTGAAC  
 AAACGATGAGACTAGTTGTCTAAACAGTGTATTTATGGGCCATTACCATAATACTA  
 AACTAACACTAGTGGACATAAATTTGTGTTTGTGATGGACCTAACACTTAATTTAAACCTAT  
 TAATTTCTGATCCAACCATATGAAAAATAGATGATGCCCCGCGCTTTGCTGCGAGATATA  
 TGTTATATATTAAGAAATAATAAATGATTTGGATTGAAACATTATAAAAAATGATTTGA  
 GAATGATGATTTAGCATGTGCTATTTAGTTTTAAAAATAAAATAAATTGTAGATATAATT  
 ACTATATGCTTGCATGTTGAGTTTTGTGTGTTTAAATGGGTTGATGTGACATACTTATATA

OsWAKs-Supplemental Data 1[1].txt

TTGGTTTTAGGAGTGCTAATAAATACTATACTTGCATGTTGAGCTTTAAGTATTTAGTGG  
ACATTAGCTTTATATAAAAAAGATAAGTGTGGCCACTGGTCACATTTGACAAATAGAGGG  
CCCAATATAAATCAAGTGCTAATTAACATATCTGATTGATTTAGACATAAACGAGTGC  
GTTCTACGGGAGCAAGACCCCAAGTACGAGGAGATGTACCCGTGCAGGCATGGCATCTGC  
ATTAACACACCAGGTAGCTACCGCTGCAAATGCAAGGCTGGAACAAAAAGGGATGGCACG  
AATTTTGGGTGCCAACAAGTGCTTCCCATGGATTGGTCATAGGTAAGAATCATGTGAGAA  
AAGTAATTTTAATAAGAGTAAATTTCCGAATGAAACAACATTTTACAAATCTATCGTGTA  
AACTATATATATTTAAGCCATAATATCGTAGATGCAGTATTTATTACTACAAAACATATA  
TAACTAGGCTATAGTATCACATTAATTATTTCTCTGTTCTAAAAATATAAATATTTTTTA  
TTAAAATTTATATCACAAAATAAGCATTTCGAGACAGTGATTGCAACGCGTGTAATTA  
ATCTATACATTTTCAGCTAATGAGATTGTTGAAAAGGGAATCTAAGTAATTAATAATTTA  
ATATCGATCGGTAGCAAATCATTTACCTCACTAAATTTCTCTATTGGGAACAAATCTATG  
TGTGGATTTTCAGTCTACTGGTGACTACTAGTGGAGTACTGGAGTGCCCAAGAAAAA  
AAACCCCTACTGGTGACCAGAGTCATATACACACACATCTTGGCTAATCACTCCAAAGAAG  
ACTTTCTTTAAAAGTTATTCAGATTAATTTATACTTCTCCATTCTCAAATATTTAACGT  
CGTTGACTTTTTTAAATATGTTTGACCGTTTCATCTTATTAATAAATAAAGTAATTATTA  
ATACTTTTCTTATCATTGTTAAATATACTTTTATGTATATATATATATATATATTTCA  
CAAAAGTTTTTGAATAAGACAAACGGTCAAGTATGTTTAAAAAAGTCAACGGCGTTAAAT  
ATTTAAGTACAGAGGGATTATCTCATCTGTGACAAAACCTTTTTGTTTCATAGGCCTGAG  
TGCTGTGCTATACATGGCAATGGCTCTGTCTGCTAGTCATTCAACTTCAGAGAAG  
GAAACACATACAGGAGAGAAACAGCAATACTTCAAGCAAAATGGAGGCCTCAGGCTGTTTGA  
CGAAATGGTGTGAGGACAGGTGACACGGTGCGCGTCTCACCGAAGACGAGCTCAAGAA  
AGCCACCAACAACCTTCAGCGACGATCAGGTTCATCGGTTGCGGCGGCCACGGCACGGTGTA  
CCGGGGCACGCTCGACGATCTCCGGGAGGTGCGCATCAAGAGGTCCAAGGCGGCGGTGTA  
CGGCGCGGCGGCGGCGGCTGCGAGGATGAGTTCGTCAACGAGATCATCGTGCTCTCGCA  
GATCAACCACCGCCACGTGCTGCGGCTGCTCGGCTGCTGCTGGAGGTGCACGTCCCGAT  
GCTGGTGTACGAGTTCTGTCCTCAATGGCACCTGTTTCGACCTCTCCAAGGCGGGACGGC  
GGCGCGGCGCGGCGGCGGCTGCTGCTGGGCTCCGGCTGAAGATCGCGGCGCAGTCCGCGGA  
GGCGCTGGCGTACCTGCACTCGTGGCGCTGCGCGCGATCCTCCACGGCGACGTCAAGTC  
CCTTAACATCTGCTCGACGGTGCGCTCGACGCCAAGGTGCGCGACTTCGGCGCGTCCGT  
GCTGAGGTCCGCCATGGGCGAGGGCGAGTCGTTTCATCGAGTACGTTTACGGGCACCTGGG  
CTACCTCGACCCGAGAGCTTCGTCAGCCGCCACCTCACCGACAAGAGCGACGTGTACAG  
CTTCGGGCTCGTCTCGCGGAGCTCGCCACCCGAGGAAGGCGGTGTACGACGACGACGA  
CGCCTCTGCTCGCGCCACGGGGCCAGAAGCGGTCTCTGTCCACCGCGTTCCTCGCCGC  
GCTCAGGCACGGCGAGCTCTGGAGCGTCTGGACCGCGAGCTCGTGAGGCGCCCCGATGA  
CGACGGCGACGGCGACGACAAGGCGGCGGTGGACGTGGTCCGTGAGCTCGCGGAGCTCGC  
GGCGCGGTGCTGGGCGGAGCGGGGACGAGAGGCGGCGATGAAGGAGGTGGCGGAGCG  
GCTCAGGTGCTGAGGCGGCGGAGCGGAGTGGCGGCGGTGGCGGAGCTGGAAGGGACAG  
CAACGGTGGCGAGGTGGATCGCAGCTGGATCATGTGTGGAGGAGGAGGAGGAGCAGTGGG  
GCGCGGCCATTTGGACACGAACACGACGGCTTCTTACCAGAGCACGGAGACTGACAAGAT  
GCCGCTGACGCTGAGTGTGAACGACCTTGACGCTGA

>OsWAK27 9631. t04035, Chromosome 3, post-processing  
ATGTCGCTGCCCGGTGCCCCGACAAGTGCGGCGACGTCTCCATCCCCTACCGTTCCGC  
ATCGGCGACCGCTGCGCCGCGCGCGGCTGAGCCGCTTCTTCAACCTCACCTGCGACGGC  
TCGCGGTGCGCGCGGTGCCATGCTGGGTGACCCCGCGGCCAGGCGGACGTATCGAC  
TTCTCGCCGGAGCGCGGCGAGCTGCGGCTCTACGCCGGCCTCAGCTACGCCTGCTACGCG  
TCGTGCGCCACCTCCCCGTCCACCAACGCCACGTTGCGCTTCTCCCTCGTGGGCACCCCG  
TTCCGCGTCTCGCCGTGCGCAACCGGCTCACGGTGGTGGGTGCAGCGCGCTGGGCCTG  
GTGGTCCGCACCGCGAGCGGCGGCGGCGGCGACGACGACCTGTACGCCACGGGCTGC  
TTCACCTACTGCGCCGAGCTGAACGCCGCGGCGGCGGCGGCGCGCGTGGCGGGGCG  
GGGTGCTGCCAGGTGCCATCTCGCCGACATCCCCTACCTCGGCGCGGCGTTCGCGACC  
GGCAACTGGACGAACACCGCGTGGCGGTTCAACCCGTGCTTCTACGCCATGGTGGCGGAG  
GACGGGTGGTACAGCTTCCGGCGGCGGCGACCTCGTGGCGTCTCGCGTACTACAACGAG  
ACCGTGGACGCGGCGGTGGCGTCCCCGTGCTCATCGACTGGGCGGTGAGGACGGGTGG  
TGCCCGGCGACGGCGGAGGAGGCGGCGGGAAGTACGCGTGCCTGAGCGGTAACAGC  
TACTGCGTCAACTCGAGCAACGGCATGGGGTACACCTGCAACTGCTCCCGAGGCTACGAG  
GGCAACCCCTATCTAGCCGGCGGTTGCCAAGACATAAACGAGTGCCTTCTACGGGAGCAA  
GACCCCAAGTACGAGGAGATGTACCCGTGCAGGCATGGCATCTGCATTAACACACCAGGC  
CTGAGTGCCTGTGCTATACTGGCAATGGCTCTGTCTGCTGCTAGTCATTCAACTTCAG  
AGAAGAAACACATACAGGAGAAACAGCAATACTTCAAGCAAAATGGAGGCCTCAGGCTG  
TTTCGACGAATGGTGTGCGAGGCGAGTGCACACGGTGCCTCCTCACCGAAGACGAGCTC  
AAGAAAGCCACCAACAACCTTCAGCGACGATCAGGTTCATCGGTTGCGGCGGCCACGGCACG

# OsWAKs-Supplemental Data 1[1].txt

GTGTACCGGGGACGCTCGACGATCTCCGGGAGGTCGCCATCAAGAGGTCCAAGGCGGCG  
 GTCGACGGCGCGGCGGCGGCGGCTGCGAGGATGAGTTCGTCAACGAGATCATCGTGCTC  
 TCGCAGATCAACCACCGCCACGTCTGCGGCTGCTCGGCTGCTGCCTGGAGGTGCACGTC  
 CCGATGCTGGTGTACGAGTTCGTCCCAATGGCACCCCTGTTGACCTCCTCCAAGGCGGG  
 ACGGCGGCGCGGCGGCGGCGGCTGTCGCTGGGCCTCCGGCTGAAGATCGCGGCGCAGTCC  
 GCGGAGGCGCTGGCGTACCTGCACTCGTCGGCGTCGCGCGCGATCCTCCACGGCGACGTC  
 AAGTCCCTTAACATCCTGCTCGACGGTGCCTCGACGCCAAGGTCGCCGACTTCGGCGCG  
 TCGGTGCTGAGGTCCGCCATGGGCGAGGCGAGTCTTTCATCGAGTACGTTTCAAGGACACC  
 CTGGGCTACCTCGACCCGAGAGCTTCGTGACCCGCCACCTCACCGACAAGAGCGACGTG  
 TACAGCTTCGGCGTCTGCTCGCGGAGCTCGCCACCCGAGGAAGGCGGTGTACGACGAC  
 GACGACGCTCCTGCTCCGGCCACGGGGGCCAGAAGCGGTCTCTGTCCACCGCGTTCTCT  
 GCCGCGCTCAGGCACGGCGAGCTCTGGAGCGTGTGGACCGCGAGCTCGTGAGGCGCCCC  
 GATGACGACGGCGACGGCGACGACAAGGCGGCGGTGGACGTGGTCCGTGAGCTCGCGGAG  
 CTCGCGGCGCGGTGCTGGGCGGAGCGGGGACGAGAGGCGGCGATGAAGGAGGTGGCG  
 GAGCGGCTGCAGGTGCTGAGGCGGCGAGCCGAGATGCGGGCGGTGGCCGAGCTGGAAGG  
 GACAGCAACGGTGGCGAGGTGGATCGCAGCTGGATCATGTGTGGAGGAGGAGGAGGAGCA  
 GTGGGCGCGGCCATTTGGACACGAACACGACGGCTTCTTACCAGAGCACGGAGACTGAC  
 AAGATGCCGCTGACGCTGAGTGTGAACGACCTTGACGCTGA

>OsWAK28 9631.t05834, Chromosome 3, pre-processing  
 ATGCAGCTGGTTTTGCTATCGATCATAGCATCCACTGTCATGTTGGTGGCATCTGGAGCA  
 CCTCCTCCCACTGCTGCTAGTCTTGCTCCCTGCCCCAAAACATGTGGAGAAGTGAACATC  
 TGGTATCCTTATGGTATCGGGCTGGTTGCTTTCCGCGAGGCTTTGAGCTTACTTGCGAC  
 ACCACCAGCAAACCTTTGAAGCTCTTCTTGGGAAACACTATGACTCAGGTGATTAGCCTC  
 TATCCTTCAGGAAGTGTCTTGCTCTATCATGTACACTATCCCCATGATTCATGGAGTT  
 GACACCTACAACCTTGTATGGGACTCTCTGGGAGGAATCTCAACGTTGAGACCTACAAT  
 TACTTGGCGTTTCTCGGTTGTGGGATCGGGGTTTACCTGTTCCATCCAGATACTGGTAAC  
 CTTGTGGGTCAATTGCACGATCAAGTGTGCCTCCATGGAGGAAATGCACATGGCAACCGAA  
 GGAGGGATTTGCAATGGCATGGGTTGCTGCACTGTCACATTCCCGGTGTTATTTGAGGT  
 TTTAGAGTGACCATTGTTAAGAGTAACGAGACAATACCGCAGCCCTTCAACAATATCACC  
 ATCAAGGCTTTCTTAACCTTCCGTCCTTACATTTTTAGCATTGCGGATCTCCTGTCCAAT  
 AAGATAAATGCAAGCACCATTGGTGTCTCCATGGCATACTCTCGACTGTCATCGCAGAT  
 GAACCAAATTTGCCAACAGCTCGGTTGGATAATAAGACACAATTTGCCTGTGGCAGTAAC  
 AATTGCATAGATGTGGCAAATGGAGGTTATTCTTGTGCTTGCCAGGAAATTCTGATGAT  
 GGCAATCCCTACCTTCTTGATGATTGCAAACAAGGTACCTACGCAACTCTAGCTCCTCTC  
 TGAACAGATGTTCTTTCTTTATTGATTGTTAATTCACACTACATATTTTTTGTGGTCATAT  
 ATGTTTCTTAAGTGAACAGAGTTTAAACCTACCCGAAAAAGAATTGTTCTAGATCATG  
 TGGTAGCACAAATATCTTTCCGTTTGGGCTTGAGCCAGGCTGTTTTGCTAAGAGGAG  
 ATTTCAACTGAGTTGTGCTCAATCAAGCTCTTATTGGAAGACCACCTGCAAAAATATGA  
 AGTGACAAATATATCATTAGATGAAGGACTCCTTTATGTTAACAAGCTTTCAGAATTTGA  
 AGATGCCAACACAAAGTATTTATCAGTATACTATGGTGGTCTGGATATTTTGGCCAACA  
 ATTAATTTATGGTTTGGAAAAGTCTGATTTATCTGAAGAGTATGGTGTGGAAGTGGTC  
 TGTGACCAATTTGACGTGTGAAGATGCAAAAAGCAAAAGTGCATATGCATGTGTTAGCAC  
 AAACAGCGAGTGTCTTGATGTTACATGGGAAGCTATATATTGGTTATCGTTGCAAGTG  
 CTCTCTTGATTTGAAGGAAATCTTATGTCCAAAATGGATGTACAGGTACACATTCCTA  
 ATGTATCTAGTGCATTGATTTTCTTGATGTGGCAGGAGCATGGAGATATGGAATATCT  
 GAAGAGAGTGATATGTTATCCAATGATTTTCATAGTGTGGAAGTTGTAGTTAATGTGCAT  
 TTAATTGAAAACAAAAGCATATAGGAGCCATCAAGAGTTTGATATATTAAGTTTACATT  
 TTTAGTTTTCTGTTTGCAGATATTGATGAATGCTCTATACCAAACCTATTGTAATGGGACA  
 TGTATAACTTTAAAGGAAGCTATAGTTGTTGTCCTCATGGTATGTCTTATGATCGAGTA  
 AGAAGGCAGTGCACCTCCAATAAGAGGCAAAATATTGTTTTGGGTATGTCAGGTTTTTAT  
 TTATTGTTTGTGTATGCATGCACTCCAATTGTTGAAAATGTTATCAAACCCCTCAAAGA  
 ATAACTTTTCAATTGCTGCAATTACTCCTGTAGGACTTGCCATTGGGATTAGCAGTGGTT  
 TTGGAGTTCTAGCTCTTACATTAATTGCAGCTATATTATTCAAAAGGTGGAAGAGAAGCA  
 CTCGGAAGAAAATTGCAAGGGCATACTTCCGAAAAAACAAAGGCCTTCTCTTGGAGCAGC  
 TGATCTCATCCAGTAACAATGTTACTCCTAACACAAGAATATTTTCTTTGGAAGATTTAG  
 AGAAAGCAACCAACAACCTTTGACCCAACACGTATCCTTGGATATGGAGGCCATGGTACTG  
 TTTACAAGGGGATTTTATCCGATCAACGAGTGGTTGCCATAAAGAGGTCCAAAATTGTGG  
 AGCAGAGTGAGATTGACCAATTTGTTAATGAGGTTGCCATCCTTTCCAGATTATTCATC  
 GTAATGTGGTGAACCTTTTTGTTGTTGCCTTGAATCTGAGGTGCCTCTTCTAGTGTATG  
 AATTCAATTTCTAATGGCACACTTCATGGTCTTCTTATGGTGATCTGAGCACCAATTGTT  
 TGGTACATGGGATGATCGAATGAGGATTGCTCTAGAGGCTGCAGGGGCACTTGCTTATC  
 TCCATTCTCTGCTGCAATGCCAATCTTCCATAGAGATGTGAAATCAACTAATATACTCT

OsWAKs-Supplemental Data 1[1].txt

TGGATGGTACCTTCACTACTAAGGTTTTAGATTTTCGGTGCCTTAGGTCCATTTCCATTG  
ATCAAACCTCGCGTAGTTACAATAGTACAGGGGACATTTGGGTACTTAGATCCAGAATATT  
TCTGTACAAGCCAATTAACCGAGAAGAGTGATGTTTATAGTTTCGGTGTGATACTTGTG  
AACTCCTAACAAGGAAGAAGCCAATTTTTCTCAACTGTCTTGGTGAACAGAAAAATTTGT  
GCCACTGTTTTCTTCAAAGCCTAAGAGATAAAACAACAATGGATATACTGGATTCTCAAG  
TTGTAGAGGAAGCTAGCCATAGAGAGATTGATGAAATGGCCTCAGTTGCAGAGATGTGCT  
TAAAGACTAAAGGAGCAAAGAGACCTAAAATGAAAGAAGTGGAGATAAGACTGCAACTCC  
TAAGAGCTGCAAGATCAAGGGCATACAAGGAAGACTTACAAAGGAGCAGCGAAATAAAGC  
CGTTATTAACCTCCGAAGTACAAATGTACTTCCCTGAACAGCACCAAGAATGTTGAAATGG  
GCCTTGTTGCTAATCCAGAATCTCAGGTTGTCTCTAGGTGCTATACCATGGAGAGAGAGA  
TGATGTACTCTTCACAGTTTCCTCGCTGA

>OsWAK28 gi |37989902|dbj |AK120279.1| Oryza sativa (japonica cultivar-group)  
cDNA clone: J013049G18, full insert sequence

CCTGTGACGGTGTGTACCTATCTCGCTCGCTCGCCGTCGTTGGGGTCGCGAGACCGCGGCGGCGGGCGG  
GCGAGGGGCGCGGCGCGGAGGCATCCGCGACCGCGAGGCGGGGGATGGCGCGGCGGCGACGCGCGAG  
CGGCTGCCTGTGCTGTTGGCGTGCTTCCATGGCAGCAGCAGCAACAACAACCTACGGTTTCTGTTT  
CTCCCCCAAATTCGAAGAAGTCAAACATAACTTTAGTTGTACATGATGATGTGTTTCGTTCTGGTGGACT  
ACAATAGTTTCAACCAAAAAGGAAGGAAATTTGTCTCCACCACAAGTCTTACATGTCGTCGAAGAGAGTGG  
CGAAGATGCTTAAAGCATCCCAAGATCATCTGCAATTTCCCATGGCTAGCTTGGTTGACCCGGCAAG  
GTTGCAGAAATTTGTTTTCTTTCTTTTAAATGAATGGGAGAAGTTCTGCTCTGGTCGATATTGGTTA  
TCCACATTTCCATTCTCTCAGAGGATGTATACTATATAATATTGGGTACCTTCTTGTTCCTATCTTAT  
GGGTTCAACAAAAGAACTATAATAGCTAGCATGCAGCTGGTTTTGCTATCGATCATAGCATCCACTGTC  
ATGTTGGTGGCATCTGGAGCACCTCCTCCCACTGCTGCTAGTCTTGTCTCCCTGCCCCAAAACATGTGGAG  
AAGTGAACATCTGGTATCCTTATGGTATCGGGCCTGGTTGCTTTCGGCAGGGCTTTGAGCTTACTTGCGA  
CACCACCAGCGAACCTTTGAAGCTCTTCTTGGGAAACACTATGACTCAGGTGATTAGCCTCTATCCTTCA  
GGAAGTGTCTTGGCTCTATCATGTACACTATCCCATGATTCATGGAGTTGACACCTACAACCTTGTCTAT  
GGGACTCTCCTGGGAGGAATCTCAACGTTGTGACCTACAATTACTTGGCGTTCTCGGTTGTGGGATCGG  
GGTTTACCTGTTCCATCCAGATACTGGTAACCTTGTGGGTGATTGCACGATCAAGTGTGCCTCCATGGAG  
GAAATGCACATGGCAACCGAAGGAGGGATTTGCAATGGCATGGGTTGCTGCACTGTACATTCCCGGTGT  
TATTTGAGGTTTTAGAGTGACCATTGTTAAGAGTAACGAGACAATACCGCAGCCCTTCAACAATATCAC  
CATCAAGGCTTTTAACTTCCGTCCTTACATTTTATAGCATTCGCGATCTCCTGTCCAATAAGATAAAT  
GCAAGCACCATTTGGTGCTTCCATGGCATACCTCTCGACTGTCTCGCAGATGAACCAAAATGTCCAACAG  
CTCGGTTGGATAATAAGACACAATTTGCCTGTGGCAGTAACAATTGCATAGATGTGGCAAATGGAGGTTA  
TTCTTGTGCTTGGCCAGGAAATTTCTGATGATGGCAATCCCTACCTTCTTGTGATTGCAACAAGAGTTT  
AACCCTACCCCGAAAAAGAATTGTTCTAGATCATGTGGTAGCACAAATATTCCTTTCCTGTTTGGGCTTG  
AGCCAGGCTGTTTTGCTAAGAGGAGATTTCAACTGAGTTGTGCATCAAATCGCACTCTTATTGGAAGACC  
ACCTGAAAAATGAAGTGACAAATATATCATTAGATGAAGGACTCCTTTATGTTAACAAGCTTTCAAGAA  
TTTGAAGATGCCAACACAAAGATTTATCAGTATACTATAGGTGGTTCTGGATGTTTTGGCCAACAATTAA  
TTTATGGTTTGGAAAAGTCTGATTTATCTGAAGAGTATGGTGGTTTGAAGTGGTCTGTGACCAATTTGAC  
GTGTGAAGATGCAAAAAGCAAAAGTGCATATGCATGTGTTAGCACAAACAGCGAGTGTCTTGTGTTACA  
CATGGGAAGCTATATATTGGTTATCGTTGCAAGTGCTCTCTTGGATTTGAAGGAAATCCTTATGTCCAAA  
ATGGATGTACAGATATTGATGAATGCTCTATACCAACTATTGTAATGGGACATGTTATAACTTTAAAGG  
AAGCTATAGTTTGTGCTCATGTGATGCTTATGATCGAGTAAGAAGGCAGTGCATTTCCAATAAGAGG  
CAAAATATTGTTTTGGGACTTGGCATTGGGATTAGCAGTGGTTTTGGAGTTCTAGCTCTTACATTAATTG  
CAGCTATATTATTCAAAGGTGGAAGAGAAGCACTCGGAAGAAAATTCGAAGGGCATACTTCCGAAAAAA  
CAAAGGCCTTCTTGGAGCAGCTGATCTCATCCAGTAACAATGTTACTCCTAACACAAGAATATTTTCT  
TTGGAAGATTTAGAGAAAGCAACCAACAACCTTTGACCCAACACGTATCCTTGGATATGGAGGCCATGGTA  
CTGTTTACAAGGGGATTTTATCCGATCAACGAGTGGTTGCCATAAAGAGGTCCAAAATTTGTGGAGCAGAG  
TGAGATTGACCAATTTGTTAATGAGGTTGCCATCCTTCCAGATTATTCATCGTAATGTGGTGAACCTT  
TTTGGTTGTTGCCTTGAATCTGAGGTGCCTCTTCTAGTGTATGAATTCATTTCTAATGGCACACTTCATG  
GTCTTCTTATGGTGATCTGAGCACCAATTGTTTGTGACATGGGATGATCGAATGAGGATTGCTCTAGA  
GGCTGCAGGGGCACTTGCTTATCTCCATTCTCTGCTGCAATGCCAATCTTCCATAGAGATGTGAAATCA  
ACTAATATACTCTTGGATGGTACCTTCACTACTAAGGTTTCAGATTTTCGGTGCCTTCTAGGTCCATTTCCA  
TTGATCAAACCTCGCGTAGTTACAATAGTACAGGGGACATTTGGGTACTTAGATCCAGAATATTTCTATAC  
AAGCCAATTAACCGAGAAGAGTGATGTTTATAGTTTCGGTGTGATACTTGTGAACCTCCTAACAAGGAAG  
AAGCCAATTTTTCTCAACTGTCTTGGTGAACAGAAAAATTTGTGCCACTGTTTTCTTCAAAGCCTAAGAG  
ATAAAACAACAATGGATATACTGGATTCTCAAGTTGTAGAGGAAGCTAGCCATAGAGAGATTGATGAAAT  
GGCCTCAGTTGCAGAGATGTGCTTAAAGACTAAAGGAGCAAAGAGACCTAAAATGAAAGAAGTGGAGATA  
AGACTGCAACTCCTAAGAGCTGCAAGATCAAGGGCATACAAGGAAGACTTACAAAGGAGCAGCGAAATAA  
AGCCGTTATTAACCTCCGAAGTACAAATGTACTTCCCTGAACAGCACCAAGAATGTTGAAATGGGCTTGT  
TGCTAATCCAGAATCTCAGTTGTCTCTAGGTGCTATACCATGGAGAGAGAGATGATGTACTCTTCACAG  
TTTCTCGCTGATTGATTTGTTTCGACCCTTGAATGATTTATTTATTTTTCGCTTATTTTTGTAGACT

GTACAAAATGAATGGCACAGACCAATCGATTTCTCTGC

>OsWAK29 9632.t00287, Chromosome 4, pre-processing  
ATGGGACCTGTGCTGCTGTGCCTAGCCATCGCGCGGCCACCGCCGTGTGCGCAGCATCA  
TCAGGAGCACCACCATCTCCCGATGCGGCGGCCGTGCGCGTTGGTAGCTGCCCCACGTAC  
TCCGGATCAGGTTACTCTTCTGCATCTGACGGCGGCAACCAAGGTATATATAGACAAAGT  
TTTATACATACTTGAAATGATTAGATTCTGAAATCGTTGGTTGCTGTCTTGTGGATAGAA  
AGCAAATAAATATACTTAGGAGAAGTTCAATTTTTTTCAGATCATTATTTACGAACATAT  
TTAACAGGGGAAATATCATGTGAAGATAAGAGTGTTTGAAAACCTCGTGAAAATCATACTT  
AAATGTTTTCTAAATTCAAGAAAACATTACAAGAGATAGACATAAATATTAATACACTT  
ACCAAATCTAAAGTCCAACTCAACTTTATTTGAGAGTAAAAAAAACAAATTTCTGGTG  
AATAGTATCTTGTTCTATTTCATCCGAAAGTTGAGATTTGGTAAGAATGTATTTTATATC  
TACACCTATCTCTAGTAATTTTTTCATGTATTTACAAAACCTTTTAGGTATGATTTTTACG  
AGTTTTTCGATACTTAGCTCGTTGTACCTGATATATATGTCCTCGATTTCAAATGCCATG  
TATGTTCAAAGTTTGGAGTTTTAGTAGTAGTGTTTTTGTCTTTTATTACATTACCAAT  
TGTATATGTTGTTTCAAATAAGAAAACATACTTCAGTTCCAACTTTAGAACAGTATGTG  
GCATCAAATAGACTTTCAATACTAACAAAATATCCATTTACGACGTGCGCCTTTACATGG  
GTGGACCTCAAGCCCTCAATCCCCATACATTCGTATGTATAGGCGAATATTTTGAACATAA  
AATCTGCCTATCCACTTGGATGAGCAGGGATTTGACTAATAAGGCCTATATCAAGTACC  
ATTAATAATAATATAATACATAATATAAAGTTTAGGGAAATTAGTGCATCATGAAAATA  
TATCTATTCAACAATGCAAAACGAGAAAGTCTTTGCCACATCTATGTAAAAAAATGAGCA  
GGGGAACCGATAATATACATATTGGGGATCTGGAGTTAAGTTTTACTGTATCTTTCATA  
CCGTCCATATATATATATAACGTTCTAATGTAATTTCTTTTTATGAAAAATGTTCTAA  
TGTAATTGATATATACTAAAATTGTTTCATTGACATCTATAGTTCCATTTTGTACGACTGT  
AAAACCTTTTGTCTTACTTGTCTAAAAGAAATCTTTCTGTACCTTTTGAACCAAGTT  
GTTTATCATATTTTCTTCAGCCAGGTTAATTGAAAGTCTGAATTGCTTATTAACCTTATT  
TAGCTATTTCTTTTGAATTTTCTATCATACATATGTCTAACATCACTTTTTATTGTTAAT  
ATTTCTTAACAGAAGAGTATGATCCCAATAAAGAAAATCCGTGTAAACGGTCATGTGGCT  
CTATGTCCATTCTTTCCCATTCGCTCTTCTATCCGCATGCTCTGGCAGTAAAAGATTTT  
TCCTAAACTGTACATCAAATAAAACACTTATCGGAATTCGCCAGCGCAATATCAGGTGA  
TAAATATATCATTAGACGATGGTGTCTATTTGTGAACAAGCCCTCAAACCTTGGAGATA  
TCATCACAACGCCAACGGTGGCAAACGAGTTACATGACTTCGACTTCTCTGGGAGCCAAG  
GCATTTGGAGATGGGCTGTGCGCAATCAAACATGTACACAGCGAGAAGTATCAGCTAT  
CGTACGCTTGGCTGAGCAACAACAGTTTGTGTGTTTATAGATCTACTGGCTACCATTGCA  
AGTGCTCTTTGGGCTACGGAGGAAATGCCTATATCGAAGATGGCTGTGAGGGTATGCTGT  
CTCTGATAAGCTTGATCGCTATCGTATTTACTATCTGACTGTTTTAAGGTACACCAAATT  
GTTTTACTCTTGCCTCATAGGTGGTAAGATGACATATATTAACATTTGAAGCGTACTAAT  
ATCAGTTATTGCAATTAATGAAAGAAACATTGTTTTCTTATTTTATTAATGTGTAG  
AAATTTGAATTTATATGTAATATATAGACCAGTAAATTTCTAAATTTTAAATAAAATTTCAA  
TATCCATGTTGTAATTTTAAATGAATTTCAAATTTATACCCTAAAATGGCTCTTTACTA  
TTTCATCACTCCTCGTTGTACAGATAGCAGAGTTTCATTATGACAAAAAAAACCTGTTT  
TTTATACTAAATCAACTAAGCAAACAAATTTGTAGAAAAAACAAAAAGTAATTAAGAGA  
ACCAGCATGTTATACTATCTACTTCAACTGATCACGTTTGATTACGTATGTAATCTGCAG  
ATATTGATGAGTGATGCTACCCAATTTTGTAAATGGAATTTGCCAGAATTTCTAGGGA  
GCTACAGGTGCTCACATTTGCCCTCGTGGTTCAATTTTGTATCTGCTAAACGTGTATGCA  
TATATGGACATGGCCTTCATCCAGCTGGTATGTGATACCTCTCTTTTATTGACAAAATAA  
GTTTGCCATGAAAAGTAGTGAAATGTAACCTCAAGTATATTCATCTGTGTTACAGGTCTT  
CTAATTGGACTTAGCTGTGGTATTGGAGTCCTTTTTCTTGTAGTAGGTCTAATTTTATTT  
GTTGGAAGGTGGAGGAGACATATGCAAAGAAAATAGAAAGGAATACTTCCAAAAAAAC  
AAAGGCCTCTACTTTGAACAATTGATGTCGTCTGATGAAAATGTAGCACATGATCCAAAA  
ATATTTTCTTGGAGAGCTAGAGAAGGCAACAGACAACCTTTTATTCAACACGTATTCTT  
GGCTGTGGAGGCCATGGCACTGTATACAAGGGAATTTTGTAGATCAACGCGTGGTTGCT  
ATTAAGAAATCCAGAATTGTGGAGCAGAACGAAATTTGATCAATTTATCAATGAGGTTGCC  
ATCTTGTCTCAAATTTGTTTCATCGGAATGTGGTAAAACCTTTTTGGTTGTTGCCTTGTATCA  
AAGGTACCTTTACTTGTGTATGAGTTTCATCTCCAATGGTACATTATATGATCTTCTTCAT  
GGTGAACAGAGTACAACATTTCTAATACGTGGGAAGATTCTATCAGAATTTCACTTGAG  
GTTGCAAGTGCTCTTTCTTACCTCCACTCTGCTGCATCAATACCCATATTCCATAGAGAT  
GTGAAATCAGCCAATATACTCTTAACGACAATTACACTTCGAAGGTTTTCAGACTTTGGC  
GCGTCAAGATCCATCTCCATTGACGAAACTCGTGTGGTGACAATTGTACAAGGGACATTT  
GGGTATTTGGATCCTGAATACTTCCATACATGCCAACTAACTGAGAAAAAGTGATGTTTAC  
AGCTTTGGTGTATACCTTGTGAGATCTTAACAAGGAAGAAGCCTATCATAGTAAATTTGT  
TTCCGTGAAAACCAAAACCTTGGTCAATTTCTTCAAACACTACAACATGGAACAATC  
ATGGAATAGTGGATCCCCAAATTTGCTAAGGAAGCAAATGAAAGTGAAATAAACGAAATG

OsWAKs-Supplemental Data 1[1].txt

GCATCGCTTGCAGAAATATGTTTACGAATCAGAGGAGAAGAAAGGCCTAAAATGAAAGAG  
GTGGAGTTAAGGCTGCAGCTCCTAAGAGCTATGATAACTGAGAGAAGCCGTGAGGAGTTA  
CTAAGGAACAATGGAATTGGGCCATCAGTACAATCCAATTCCAGCACTACATCTGTGACC  
AGGAGTGTGTGCTTCGTGCAGGTATTGGCATATCCACTGATCAGGATGCAACTCGTTGC  
TATACCATGGAGCAAGAGCTCGTTTCTTGACAGATCTACCGCGCTAACTGTACTACTC  
TATCTTTTATGAGACATCACAACTATTCTCTGCCGTCTTTTTCTGGACTGTTTCCTTTT  
AGCGTGTGAAAAAAAACAGATTAACCTTTTTGAATGTTTGTGTTTGTGTTAGTGAAAGATCTT  
CTTCACTTCCCTCCTCTAGAGTGGGCCGAGTTAGTAACCTGA

>OsWAK29 gi |32987848|dbj |AK102639.1| Oryza sativa (japonica cultivar-group)  
cDNA clone: J033099P12, full insert sequence

GGAAGATCTCGACAGTCAGATTGCTTTTAGGGGAATATGCAAAAAGGATTGCTCGACAGTCTCAGACCAC  
CATGGGACCTGTGCTGCTGTGCCTAGCCATCGCCGCCGCCACCGCCGTGTGCGCAGCATCATCAGGAGCA  
CCACCATCTCCCGATGCGGCGGCCGTGCGCGTTGGTAGCTGCCCCACGTA CTCCGGATCAGGTTACTCTT  
CTGCATCTGACGGCGGCAACCAAGAAGAGTATGATCCCAATAAAGAAAATCCGTGTAAACGGTCATGTGG  
CTCTATGTCCATTCTTTCCCATTCGCTCTTCTATCCGCATGCTCTGGCAGTAAAAGATTTCTCCTAAAC  
TGTACATCAAATAAAACACTTATCGGAATTCGCCAGCGCAATATCAGGTGATAAATATATCATTAGACG  
ATGGTGTCTTATTTGTGAACAAGCCCTCAAACCTTGGAGATATCATCACAACGCCAACGGTGGCAAACGA  
GTTACATGACTTCGACTTCTCTGGGAGCCAAGGCATTTGGAGATGGGCTGTGCGCAATCAAACATGTCAC  
ACAGCGAGAATGATCAGCTATCGTACGCTTGCCTGAGCAACAACAGTTTGTGTGTTTCATAGATCTACTG  
GCTACCATTGCAAGTGCTCTTTGGGCTACGGAGGAAATGCCTATATCGAAGATGGCTGTGAGGATATTGA  
TGAGTGTAGTCTACCCAACCTTTTGAATGGAAATTGCCAGAACTTCTAGGGAGCTACAGGTGCTCACAT  
TGCCCTCGTGGTTCAATTTTTGATCCTGCTAAACGTGTATGCATATATGGACATGGCCTTCATCCAGCTG  
GTCTTCTAATTGGACTTAGCTGTGGTATTGGAGTCCTTTTTCTTGTAGTAGGTCTAATTTTATTTGTTTCG  
AAGGTGGAGGAGACATATGCAAGAAAAATTAGAAGGGAATACTTCAAAAAAACAAAGGCCTCCTACTT  
GAACAATTGATGTCTGTGATGAAAAATGTAGCACATGATCCAAAAATATTTTCTTGGAAAGAGCTAGAGA  
AGGCAACAGACAACCTTTCAATCAACACGTATTCTTGGCTGTGGAGGCCATGGCACTGTATACAAGGGAAT  
TTTGTAGATCAACGCGTGGTTGCTATTAAGAAATCCAGAATTGTGGAGCAGAACGAAATTGATCAATTT  
ATCAATGAGGTTGCCATCTTGTCTCAAATTGTTTCATCGGAATGTGGTAAAACCTTTTTGGTTGTTGCCTTG  
TATCAAAGGTACCTTTACTTGTGTATGAGTTCATCTCCAATGGTACATTATATGATCTTCTTCATGGTGA  
ACAGAGTACAACATTCTCATTAAACGTGGGAAGATTCTATCAGAATTTCACTTGAGGTTGCAAGTGCTCTT  
TCTTACCTCCACTCTGCTGCATCAATACCCATATTCCATAGAGATGTAAATCAGCCAATATACTCTTAA  
ACGACAATTACACTTCGAAGGTTTCAGACTTTGGCGCGTCAAGATCCATCTCCATTGACGAAACTCGTGT  
GGTGACAATTGTACAAGGGACATTTGGGTATTTGGATCCTGAATACTTCCATACATGCCAACTAACTGAG  
AAAAGTGATGTTTACAGCTTTGGTGTTATACTTGTGAGATCCTAACAAGGAAGAAGCCTATCATAGTAA  
ATTGTTTCGGTGAAAACCAAAACCTAGGTCATTGCTTTCTTCAAACACTACAACATGGAACAATCATGGA  
AATAGTGGATCCCCAAATTGCTAAGGAAGCAAATGAAAGTGAATAAACGAAATGGCATCGCTTGAGAA  
ATATGTTTACGAATCAGAGGAGAAGAAAGGCCTAAAAAGAAAGGTTGAGTTAAGGCTGCAGTCTCTAA  
GAGCTATGATAACTGAGAGAAGCCGTGAGGAGTTACTAAGGAACAATGGAATTGGGCCATCAGTACAATC  
CAATTCAGCACTACATCTGTGACCAGGAGTGTGTGCTTCTGTCAGGTATTGGCATATCCACTGATCAG  
GATGCAACTCGTTGCTATACCATGGAGCAAGAGCTCGTTTCTTGGACAGATCTACCGCGCTAACTGTAC  
TACTCTATCTTTTATGAGACATCACAACTATTCTCTGCCGTCTTTTTCTGGACTGTTTCCTTTTAGCGT  
GTGAAAAAAAACAGATTAACCTTTTTGAATGTTTGTGTTTGTGTTAGTG

>OsWAK30, 8332.t00009, Chromosome 4, pre-processing  
ATGGCGGCGGCTCAGCAGCTCGGAGGTGGCGGCGGCCCTGGTGGCGGCCGATGGCTC  
GGAGGTGGCGGCGGTGGCTCCCTCCGCCTGTTTGAACCTCCTCCTCCTTTCTCATC  
CTCTTCTCCTCGTCTATCCTCCTCCTCTCCGGGAGCATCGGGCGGCAACGGCAGAGCCCTC  
CCTTCTGTGCGGATCCGGTGTCCCCTCCCCGGATCCAGCGGGAGGGGAGGCGGCAGGCGG  
CGCATGAGGGGCATGAGAGAAGCCGTGAGGAGTTACTAAGGAACAATGGAATTGGGCCATCAGTACAATC  
GATGCTCATTCTTTTTTTTTTTTGAAGAATTTGTGATGTCCATTGAGTATGAATTCTAT  
TTGTGATATTAAGTGTGAATCGTGATGTGAACATAGTATGTTTCATTGATCTGTGATG  
TTAAATTGATGTGGGGATTTGGGGATTTATATATGGAGCAACTCGCTTTGGAAAAATCAA  
TATGCAAGTAGCAAAAAACAATAAAAGAAGCAACCCGAACTAAAGGGTTGCAAAACCAG  
GACTAAAGAGGGTATCTCAGCAGTTATTTACTCGCCGCTATACGCACCCAAATCCATGC  
ATGTGAAGTACAGAGAATTTTGCTTACAGCGTACTCCCTCCGTCCAAAAAAAATCCAATC  
CTATAAATGTTTTTGAACATTACGTTATCCATATACATCCTCAGGATTGTTTTTTTTCC  
AGAGCAGTATCCCTTTGCGTTAATATAATAGGATAGTGTAAATTGAATCTGGAGTTAATGT  
GATGGATGTGTGATGTGGCACTGACTCAGCAACAAGTAAAGGTAAAAATTAAGTTGGC  
GACGAGGAAGACTACATTAATTGGAGATTCGTGTAGCGGTGGCTCGAGGTGGAAGATGTG  
AGTGAAAGGATTGAGGCATATTTGGTAGAGCTCCAAGCCTCCAACCTTTAAATTTAGCT  
TCAGGATTTGGGTCTGGAGTTGTGGAGCAGCTAAACCCATCTCCACCTCTAAAG  
TTCATTATGTGAGAGCGCTTACCCAGCTCTGCTCCCACTTTAGGTGGAAGTGAAGTGT

OsWAKs-Supplemental Data 1[1].txt

TTGGCTGAGCTCTAGCTCTAGGAGTGGTGGAGGTGGAGCTATAGCTGGAGCTATGCCAAA  
 CAAGCTCTCAATTATGCAGCGATAGCGATGTTGACAAACAGTGGATTGTTCTATGACAA  
 ATAGGATAGATGCAATTTTGGTTTCCAGCGATAAAATGGGCCACATGTATACTCCCTCCT  
 TCCCATAAAAAACCAACTTAATACTGGATGTGACACATCCTAGTTCTACGAACCTAGATA  
 TACCTTTGTCCAGATTGACGTAAGTAATATGTCACATCCAATTCTATATTCGTTTTTT  
 TGGTTGGATGGAGCGAGTATATATCTAGCTAGCCAATAGGCTACGGTCATCTAGGCCACC  
 GAGCCAGGTGAGGCTCAGCTTGCTTCATTAAGGAGATACAGAGCCAGGCCATATTTCCAA  
 CGGTAATAGAACATCCCCAAGAAGATGAGTTCATAAGTCAATGTACATGAATGAATATA  
 TTCACAGTCAAATTTAGCATTTGGAAAAATTTAGGCGAAGCCTTGGGAGGGATCCGAGAG  
 AGCCTTCTCGCTAAAGCTAGTAAGAACCCTTGTCGATCTGACCGGAATCCTTTGTCATGA  
 GTAGAGGTGATGGATCGGTTTTGTCATCAGAATCCAATCCAATCCAATTTGGCTCTTCT  
 TGTGTTCCCTTTTTTAGGTGTTAGGGTTTTTGGAGTACTAATTTTCTCTAAAGCCTAATT  
 AAACCTTGATACGCAAGACCAGCCATACTATAAATATAGATGTCAAGCCTATTGTAGGAA  
 CCAACAATTAATCGACAAAATCGATTTAGTATCTAACCTCTATCTTCTACCCTACCTATA  
 TCATTCTTCACTTATTTCCATCCCTATTTTCCCTCCAATCCCATAAATTGCTCATCGTATTT  
 TGTCTCCCCTGCATTAGAGGACATCCTAACTGGCTTTTCAAGCCTAGATCAAACCTGGCCC  
 ACACTCATTTTTGCGAGTTGCGTTCTCCATTTGACAATGAACATCTACAGTACCACCCTT  
 TCGTTGACTTATTTCCGTGTTCACTACTCTTGAACCCTTCTCTCGTATCGAGAAGCACT  
 GCATACAGGGAATTTTCTATGGCATATTTCTTGACTACGATATCAACGCGGTGATGGCG  
 ATTCATAACTACGAGTACAGATGACCCCTCATTCTTAACAGGTGCTACATCTTAGACGA  
 GCCACTCTGTGACCCGTAAGAGATGTAATTATCTGAGACGAGCATTTTTTACCTATCATA  
 GATTAATATGCCCTGTTTAGCATCCCAAGTTTAGGCTGTGCAAGTTTTAACACAGGGCC  
 AGAGATATTTAACTACCTATATTTTCTCCTTCATGAGCGTGAAGTAAACTAAGAATAG  
 CTTTATTTATTTTTATATTTAACATCTACTGTTTTCTCCACTTTTCAGATGTTAATGAGT  
 GTGAAAACAATTTCTATTTGTGGTGCTGGGTCCACATGCAAGAATACAGAAGGTAGCTATC  
 GTTGTGACTGCAATTTGCGCCAAAGACGTGACAATAGTTCTGATAACATGGGTAAATTGTG  
 AACCCATATTTTCCAGAGCTGCCATAGCAGTCATAGGTGAGGTTCAATACATGAATGCAA  
 TGTTGATTGAAATTTGCAGCATGCCATACATTCCACATATAATATATAATGCTCTAATTA  
 CATGCAGTTCTGCATTCCATGTATACACCATATTTGCATTGCACTACATTCAACTTGAAG  
 CTCAACATTGAAGTGTGAAAACATAATTTTCCAGATAGACCATGGCTGTGCCTAAATG  
 TTATCTTTTTCGATGAGCATAGACCATGTGGTTGTGCCTAAATTATCTTTTACAGTGAGC  
 AATATATATGGACTACGCAATTTGCATGAATATGTATAAGTTACCTTTGCAGTATTGCATG  
 TTCTATATATTAACATTTTTGTTTCTATTTGTCCACAGCAACAGTTTTTATCATCGCAC  
 TTCTAGTCGTGTTACTAATGTTTCATTCTATTGGAGCGTAAGAAAAGAAAGCTGAGAGCTT  
 ATTTCAACCGAAATGGTGGACAATTGCTGAAAAGTATCAAGATAGATATTTACACAAAGG  
 AGAAACTTGACCAATTACTAAAAATTACAGTACTATTATTGGAAGGGTGGGTTTGGTA  
 AGGTGTACATGGGAACCATCAATGGAATGTGCGAGTTGCGGTCAAACGCTGCATAACAG  
 TCAGTGAGGCGCGCAGCGGACCTTTGCAAATGAAATCACAATCCAGTCTCAGATTAGTC  
 ATAAAAATTTAGTTAACTTTTTGGGTTGTTGCTTGGAGACAGATGTTCTATGTTAGTCTA  
 TGAATTCATACCCAGAGGGAGTCTCTGTGACGTACTTCATGGTAAAGAGTATAATAAGAA  
 ACATCCTCTCTCACTACTAGCACGGTTGGATATTGCTATTAACCTCTGCAGATGCTCTTGC  
 TTATATGCATTATATGCTAGTCAAAAAATTTCTCATGGAGATGTGAAATCTGGTAACAT  
 TCTTTTGGATGATACTTTGTGCCAAAAGTTTCTGACTTTGGGACATCTAGGCTCATGAC  
 TATTGAAAAGACCAACCACTTTTGTGTCGGAGATATGAGCTATATAGACCCTGTATA  
 CATGAAAACCTGGCCTTCTCACAGAGAAAAGTGATGTTTATAGCTTTGGTATTGTCCTTTT  
 GGAGCTCATGACGGGAAAGAAGGCAAGGTACAATGGGAATAATAGCCTCCCCATGAACCTT  
 TATGGAGGCTTACATGACAGAGAGTAGAGCATACGAGATGTATGATAAGGAGATTATAAC  
 TACTGAAGAGGACATAAAATGCACTGCAAATGTTGGTACCATCGCTGTTAATTGCCTTAA  
 AAATAGTGTGGATGAGAGGATGACCGAGGTTGTGAAGGATCTTCAAATTGTGCCAAGTGA  
 ATGTTGCAAATCCTTGGGCATAGGGAGCATGACTCAACTGAACCTATGGGTATTTAA

>OsWAK31 8332. t00008, Chromosome 4, pre-processing  
 ATGGCTGGGATATCGCAGCTCCTCCTGCGCGAGTCCACCATCACCATCACCATCACCACC  
 ACCACTAATATTCCCGGTGCCGGCGTGAATTTGCCAGACAAGTGCAGCAACGTATCCAT  
 CCCCTACCCGTTCCGCTACGGCAGAGGCTGCTACCTCGACCTGCCGGGCTCCGGCAGCTT  
 CAGCATACACTGCAACACAGACGACCGACCTCCCAACCCTACACCGCCGATGCCCTCTT  
 GGTCTGAACATAACGCTGGAGACAGCGGAAATGTTCTGCTGCTCGGCTGGCGCCCTCGC  
 CGTGGTCAAGTACCCATCAGTAAGAGCAAGAAGTCCATCACGAGCAAATTTATCACTAC  
 TACTCAACAAGAAGAAGAACATTCTATGCAAGTAAAGTAAGTGTAGGAATGCCTGTCAC  
 CCAACAAGTAAACATGACATTCTTACCAAGCGGATACACCTTGAGCGCACCGTACCGGCT  
 TTCCCGCAGGGGAACATGTTCCAGGCGGTGGGTCGCTCACCATGGCGAAGTTGTACGG  
 CAGCGTAGAGAACAGCAGCAGCAGCAGCAGCAGCAGCAGCAGCAGCAGCAGCAGCAGCAG  
 CAGCAGGAGGGCAAATGATAGGGGAGAGGGCGTATGCGTACGACGCGGGCTGCATCACCT

OsWAKs-Supplemental Data 1[1].txt

ACTGCCCCGAGCCTGAGCGACGCCGCGGCGGATGGGGCGCCGTGCAAGGACCTCGGCTGCT  
GCGAGTCGCCCATCACGCCAGGCCTCACCCAGTTCGCCGTAGGATGGGGCGCATGGCCAG  
GTGCATCCGACGACGACTACGGCGAGTTGGACCCGAACAGTACTACCAGTATGCCTTTG  
TGGCCAGGACTGGTAAGTACTAGCTAATTCGGACCTGATGATGATTCTTTGTTATACTATA  
TCTTTGCAAGTTTTTAGATGTTTTCCCATTTCTAATTAATAACTTGACGTTGCCTAGCTA  
CCCACCATATATTATGGGTTTTAATTGGTGTTCCTATATATATATCTCTAGTAAAGAAA  
ATTTACAGCACAAGGAATATATATAGCACCCATATATATAATACTAAAAGAATTGGCACAC  
GTATGAATTTTTAAAATTGTTTCAACAGTAATGTAGTTCAAAGACTGTTCAATTTCAAGTC  
ATCTATAGCATCAAAATACATTACGTTTTTTGGAAAGGACTTAGAAGAATTGCATGTATA  
GTGTACACTGCTGGAGAATGCATATATACTCCCGGTTACATCCCTCTTTAATCCCGGT  
ATGCAACCGGAACACGAATCGGGTGAAATAACCGGGACTAAAGATATATCTTCTTTAGT  
CCCGGTTGGTGTAGCCATCTAGAGTTTATTTTTTTCTTTTTTTCTATTGTTTTTAGCTG  
CTTGCAATTTTTTTTCGTGTTTTTTGCCAACATTCACATACCAAAAAATCACAGATCGAG  
TTTTTTTTCTAATATTCACAAATCCAACATTCACATATCACAAATCCCAGATCCAACATC  
ACAAATTCATCCAAAAATTGAAATCACAAATCATCCAAAAAAAACATATCACATCTAAA  
AATTATCCCCACGCGGGTCGCCGCTCCGCCCCGCGCCGCATCAGGCCGCGCCACACA  
CGGCTGCCGCTGCCCCGAGCGGGCGCTCGGCTCCGCCCCGCGCGGGCGCGCGCTGCC  
CCACGTAGGCCGCTCCTCCGCCCCGCGCCGCGCCAGGCTACTGCCGCCGACAGACGCC  
GCTGCGGGCCAGCGCCTTCGCCCGCGCGCCGCGCCAGCAGCCACCACGCGTTGAGCCGC  
CGCTGCCCTCATGCGGGCCACCGCTACGCCCCCTCCCCCCCCCCCCCCCCGCCACGCTCG  
CTCCTAGCTGTGCAATATTTGAGAGGAGAAGATGAGAGCAAGTGAAGAAGAGGATAAGG  
GAGAGGGGAAAGAGGTGGAATGGTAGGAGGAAATAAAAAGATAAGGAGCAAGTGTG  
CGATAGTGGAGGAGAGGATAAGTGCAGGGATTATATACTACATGTTAAATTTTAGTC  
CCGATTGGTAGTAAAGATTATTTAGATCTTTAGTCCAGGTTATAAGATCCTCAGCCCCCT  
GACAGGCCACTGACAGGCCTTATCAGGGATGAACCGGGACTAAAGTTCCAATCGGGACTA  
TAGATCACATAGTTCCGATGGAATTTTTAAGCGGGACTAAAAATGCTTTTTTATTAATCT  
AGTTTTTGACTGACCCAGCAAAGGTCAGTTCTCCAGTTGTGGTATAAGTCAACAGTTAAT  
TAATTGTTCAATACTACTTACTCCGTTTCAGGTTATAAGACGTTTTGACTTTGGTCAAAG  
TCAAATACTTTAAGTTTGATCAAGTTGTAGAAAAAATATTAGCATTTTTAACCAAG  
ACAAATTTATTATGAAAATATATTCAATAATTGATTGGGTAAAATAATTTAGTATTATA  
AATATTACTATATTTGCCTATAAACTCATCTGTGACGGGCTCCAATCCAACCCGTAAAA  
GGTGACTCGGTCCCTTTTGACGGGGTACTTTAGAGCCTAGCACGGATGACTAATTGGTGA  
TATAGTCTCTTGCAACTCAATAACAATGTTGCTTATAGTTGGCCAAAAGCCCGAGGCCT  
GATAGCCCGGCCCGGCCATGGCACGGGTTTTGGTCCGGCCCAAGCACGGCACGACCTCT  
ACTTTGGCACGATGGCCCGACCCGGCATGGCCAGGTCCAATATCAGGGATTTAATAGAT  
GAGGGAGCCAAAATAGACTTAATCCAACCATATAAGGCACGGCGAAAGAGATGAGGGAGA  
CAAAATGAACTTTTCAAAGGAGGAACACGGTAGGCTTCGTGGCTTCGAGTTGGTCCGGCA  
TGACCCGAGTCTTATGGTCTGTGCTTGGGCCAAACGCGCAGCAAGTGGATGGGCACAGC  
ACGATCCGGCGTGTAGGTGCGGCGGTGTGCGGCCGACTGATATCGGCCGAGCCCGGTCA  
TGCTCGGGCCATGCTAGGGCGGGTGATCCTTTTGGGTGTGTTGGTTGGTGGATGAGC  
CTGGATGGGAGATGCATGGCCGCCGATTTTTTTTTGGTGTGTTGGTTGGAGGGCAGGGTGG  
ATGGGGCGGCCCAGAATAGGGAATCTTCCCTCAATAGGTTGGATAAGTGCATCTGGCCGA  
TTTGGTTGGATGAAGCCATCTAGTTTTGGTCCGGGTGATGTGACCTATTCTGATTGGCTA  
TGTTGGTTGTTTTGTTTTGTTAAGCAAGCTCTAAATGATTTTTTTTTCTCTAAACTGTTT  
ATCTAATTTATGGTTTGATTACACCATATATTTGTTACAATTAATCTTTAAAAACAAGA  
TCTCGGATGATTATATTATGATAAAAAATATATATATATGACAAATGGGTCCCACTATCTT  
ATGTTTTCTCCATTATGCTATATCCCTAACCAACAAGAAATTGGATCAACATATCC  
ATATAAACCAAAACAAAAAATTGAATCGCCATATCCAACAAAAATATGGATGGCCATATCCC  
ATCCATGCATGACCGTGAACCAAAACACACCCTTGCCATCTATAATGCTGCTCAACCGTG  
ACGGGTTATATATGTTGTAATCCGGCACCAAGAGGTTTTACCTTAAAAATGTAAGTGC  
TAACAAAATGACAGAAATAGAGATATACATTCTAGAATCCCATACATTTACAATCAC  
ATAAATTCAAAACCTCGATTATTTACAAGTCTCAATAATTGGATGCCTCACATATTTCTT  
CAACAAAACTTTTAAGTTGCAAGCCTGAAGAATTTAGGGAAGTGGACATGCATCTTGAAAA  
GAGAGCTATCACACGACCTGTGAATTTATATACAATTTGATAAAAAATAATAGAATTAGTA  
ACGCAAAATGTTACCAACAGCCACCATATATAGATGGTTGTCATCGGTATAGGTTTGAT  
CACACAGCCCATCACAGATGATTGCCACTGTACGGGCTGCAGGTCTCCGTGCTGATTGG  
CTGATTAGGATGCTAGGGTTTTGAAGTAGTAAGGCTACCAGTGCTACTTCCAAAGTGCCG  
AAGAGAGTTTCTAATAGTGAAATTTCTCTAATGACTCATTTTGTGTTTGTGCTCCAAA  
TTTCATGCAGTACCACATGGGGTTTTCATCCAGGGGAAAAGAGATCGATACATTTCTATG  
CACATAAGGTTACTCGCCGTGCACACCAACTAACATATATACAAGAAATTACAGAATAAT  
TGATACATGATACATATAACTATTGCACCTATATGTTAATATGTAAAGTCTCAACAGTA  
TAACATGAAAAATCTGATAATTTCTCAGAGTTTTGTCTTCTATGTCTCTGTGTTGCTG  
AATCTAAAGTGGAGACGTTACACTTGGATATGTTGTTCTATTATAAGTACATGTACAATT



OsWAKs-Supplemental Data 1[1].txt

TTTTAAGGCATGTTGGTGAGATTTCTTAACACGGAGCTTTTGTGTACATCCGTTTCATCT  
AGTCTAGTTGTTTGTGGAAATCTGGTCTTCATGTATCTGAGTATCTCTGGGGTTTTGAT  
ATCAGTAAATCTCAACTTGTAACTAGCTGAACAAATCGAGTAGTATTTTTTATTCATG  
GGCGAGTTATTCCATCATATATTTGTGATATCTCACATTGATTGTAATACTTTTACGCAG  
GTATACGTTCAAACAAGATCATCTTACTACTGGGACATAGACAACATCAGTGTTCCCTTT  
CGTTCTTCACTGGGATATCAAGGATGGACCTGCATGCCGACCAGAGACAAATTATGATAG  
TCCCTTCGGCGCATGTATAGCAACCACAGCAAATGCGCCAATGTCACCAGTGGTTTGA  
TGGCTATTTTTGCAACTGCTCCGAGGGATACATTGGCAATCCGTACATACCAGATGGATG  
CAAAGGTTTGTATCCCAGCGCTCTACTCTCCATCCGCATGCTTATGTTTTTTTTAGATAA  
TGGATTA AAAACCCGACCTCTACATCCAAAAGGATGTACACAGCCCAACATGTCCATACA  
TGAGTACTTAGACTCCAGCCATTACATGGGACAAAAAAAAGTTTAG

>OsWAK30/31 >gi |32968453|dbj |AK058435.1| Oryza sativa (japonica cultivar-group) cDNA  
clone: 001-015-F06, full insert sequence

AAGCTGGTAGTTTAAAGCTGGCCATACATGCATCCATCATCCATGGCTGGGATATCGCAGCTCCTCCTGCG  
CGAGTCCACCATCACCATCACCATCACCACCACCACTAATATTCCTGGTGCCGGCGTCAATTGCCGAGA  
CAAGTGCGGCAACGTATCCATCCCCTACCCGTTCCGCATCGGCAGAGGCTGCTACCTCGACCTGCCGGGC  
TCCGGCAGCTTCAGCATCACCTGCAACCACAAGACGGACCTCCCCAACCTACACCGCCGATGCCCTCT  
TGGTCCTGAACATAACGCTGGAGACAGCGGAAATGTTCTGTCGTCTCGGCTGGCGCCCTCGCCGTGGTCAA  
GTACCCATCAGTAAGAGCAAGAAGTGCCATCAGCAGCAATTTATCACTACTACTCAACAAGAAGAAGAA  
CATTCTATGCAAGTAAAAGTAACTGTAGGAATGCCTGTACCCCAACAAGTAAACATGACATTCTTACCAA  
GCGGATACACCTTGAGCGCACCGTACCGGCTTTCCCGACGGGCAACATGTTACGGCCGTGGGGTGCCT  
CACCATGGCGAAGTTGTACGGCAGCGTAGAGAACAGCAGCAGCAGCAGCAGCAGCAGCGGGGGCGACGACGACG  
ACAGCAGCAGCAGCAGGAGGGCAAATGATAGGGGAGAGGGCGTATGCGTACGACGCGGGCTGCATCACCT  
ACTGCCCGAGCCTGAGCGACGCGCGGGCGGATGGGGCGCCGTGCAAGGACCTCGGCTGCTGCGAGTGCCT  
CATCAGCGCAGGCCTCACCCAGTTCCCGTAGGATGGGGCGCATGGCCAGGTGCATCCGACGACGACTAC  
GGCGAGTTGGACCCCGAACAGTACTACCAGTATGCCTTTGTGGCCAGGACTGGTATACGTTCAAACAAG  
ATCATCTTACTCACTGGGACATAGACAACATCAGTGTTCTTTCTGTTCTTCACTGGGATATCAAGGATGG  
ACCTGCATGCCGACCAGAGACAAATTATGATAGTCCCTTCGGCGCATGTATAGCAACCACAGCAAATGC  
GCCAATGTCACCAAGTGGTTTGGATGGCTATTTTTGCAACTGCTCCGAGGGATACATTGGCAATCCGTACA  
TACCAGATGGATGCAAAGATGTTAATGAGTGTGAAAACAATTCTATTTGTGGTGCTGGGTCCACATGCAA  
GAATACAGAAGGTAGCTATCGTTGTGACTGCAATTTCCGCCAAAGACGTGACAATAGTTCTGATAACATG  
GGTAATTGTGAACCCATATTTCCAGAGCTGCCATAGCAGTATAGGTGAGGTTCAATACATGAATGCAA  
TGTTGATTGAAATTTGCAGCATGCCATACATTCCACATATAATATATAATGCTCTAATTACATGCAGTTC  
TGCATTCCATGTATACACCATATTTGCATTGCACTACATTCAACTGAAGCTCAACATTGAAGTGTGAAA  
ACATAATTATTTCCAGATAGACCATGGCTGTGCCTAAATGTTATCTTTTCGCATGAGCATAGACCATGTG  
GTTGTGCCTAAATTATCTTTTCACGTGAGCAATATATATGGACTACGCAATTGCATGAATATGT

>OsWAK32 9632.t02240, Chromosome 4, pre-processing  
ATGAGCCTCTTCGATGGATTACTTCTCTGCTACTAATTGTGTTTACTATGACCCCTGTG  
ATACAAGCTTCAAACAGAACTACAAGCCTTCCATCTGCTGCCACGCTTGCAAGTTGCCAA  
AGAAGCTGCAGTAATCTGACCATCGACTATCCCTTTGGAATTGGATCATCCCATTTGCTCT  
AGGCAGCCCGATTTGAGCTCATCTGCAACAATACCACACAACCACCAAGGCTGTTATTC  
AAGAATGGCACCCTAGATGACTTCTCCAGTACTGGTAAGATATACAACCAACTA  
TAAATCGGATTTTCAGATATACAACCAACTATAAATCGGATTTCAATTTGAATTGATGTTA  
CCAGTTGAGCTGTGGGATTTTAGGTTGAAATTTTAATATTCAACTAAAAATATTAAGTT  
GAATGGTGATATTTTGGACCAAGAGGGGGCAAGGCGCTGCCTTTGTTGGCAGAGAGGGC  
AAGAAATAACAAATCCCATACTTTTCTAGGTATAAAAAGCCGTTAAATATAAACTCCTT  
CATGTAAGAGCTCCCCTTTTGTGCCTAGATTATTTGCTGGGGAATTACCTTCTAGTTATT  
GAGGGCGTTATTAAGGCTTTTGTGTTAGACTAATGAAAATGCAATCTAACAACCACTCTA  
AAGTAAAAGCTCTGTCTTTTGGTTTACCTCCTCTTTAGTTATGCCTAACAGCACTCAT  
CAATTATTAATATCTGTAACCTCCTCTCAATTATTTTTATTTTTCTCTCCAGAATATTT  
GGACGTTATGTTTTCCATTCCATCTCCATGAAATCCAATGTCAGTGTGTACAACATGTC  
ATGGGATGCTCCTGGGAAATCTTTCACCCTTGGATATGCTAGACTAAACATCACCGGCTG  
TGATTTTCGATATATACAGGTGCTCGATCAAAGTGAAATGTTCTGCCAAGCTTTGCAA  
CGTTACATGCCCAACAGGGGAATCACAGAGGACATTGCTAGGCAGGACTGCAATGGCAC  
CGGATGCTGCTCCATCGATGTTCCAATTCGTGCTCAGACCTTACAGCTTATGTTTGTCCG  
CCATGGCAAAGGGGCGGTGCAACTTGACGCACAATCCAACCAAGCTCCCTGTGGAGCAC  
AATCAATGTAACAACAGTTTACGCTGTCATTTTGTGGAGAATCCTGGACCAACCGACGTG  
TGCCAGCACCTTCGATAACAGGACCAACTATGCCTGTATTAGTGAGCACAGCAAATGCAT  
GGATGGCTATTTCCGACCGATTCTTGGTTACAATTGCTTATGTGATGGTGGGTACCAAGG  
AAATCCATATATACTAGATGGCTGCTCAGTGATAGAGGTAATTAATTTAATCTGCTCAA  
ATAATTATACACCATGAACCTCGATATGGCCTTTTCTGTTTATACATAAGATGAAATTAC

OsWAKs-Supplemental Data 1[1].txt

GATGGTAGGTCAGGAAATTTCTCAGTCACATGCAGGTTTCATGGGGTTAAATAATTATACT  
CTGCAAAATTGCAAGCAGGTTGACTTCATTATACTTTTTGATAGAATGACAGGGGGAACA  
TATGTGATATTGTAGAATGGTGAAGCAGAGATAGCCTCAACACAATAATTCTATTGAAAG  
ATATAGTAACATATAGGCCGGGACCTTCCTTATCCTTTAACCGACTTATAGAAACATAAT  
CGAGGGATTAGGTAGAAAACCCAACCGGTACATATGGAAGGAAATAACGATTCTAACAG  
ATATCCCTAGAACAAAAAATATGCCGTCATTTTCGTTTTATAAAAAAGAACAAATTTTGC  
TTTATCCTAAGCCATTTTATCTTTGAGTCAAATTTTCCAATATTTTCTCATTCAACTCAT  
TTCATTTGATTGCACTATTATGCATATGAACAACACTTAGCTTGTATCAAGAATAGCTAG  
AGTTAGTTTCAGCCATATTAGCGCAACCATAATAGTACTTATCCAACAGCTAAAAATCATT  
AGGGAAGAAACAATATTTGTTATTAGATGATAGTACTATGAGTCTATGAGGCCAAGCTTG  
TCCACTCATGGGTACCCGTACCCATTGACACACTCCTTCCAAATCCAACATAAGTTAGC  
CAAATAAACTAGTGTGGGTGCGCCAACATGCTTCTCCGGCTAAACATACTTAAGTACCC  
CCCCCCCCCGGTTCAATTAGCTGCTGACCAAGTTACCACATGAACGAGATCCAAATTTA  
CAGTAGGATTAGTTCAATATATATTAATTGTCTGTACACCATATAAACCAAGAGAGTCTT  
AGGCTAATCCTTTTGGGAGAAGCAAATTAAGAGAAAAATCCTAAAAACGCATGGATTACCC  
CCCACCCCCCCCCACCCCGTGGCACAATAATTTGGAGAATGGCGGCCAGTTTTTTCAGCAC  
ATCTCCTTCAGACAGTTGAATGCTATACAAATTTCTTAACAACCGTTACTTGTGAACT  
GTTAATTTTCATTTACAAAACAGGATATAATCCATTCCAACAGAAGGATGTCTGCGACAG  
AAAGTGCGGGAGCATTGATGTCCCATATCCATTTGGCCTAGAAGAAGGGTGCGCTGCAAG  
GAAATCATTTTCAGTAACTGCACAAACATGTTATCGTCCAGCCTCCAACGAACGATGA  
ATACCATGTAACGTATATAAATGTCAGCAATGGGCTCATGGGCGTAGAAGACACCACAGA  
TTACAAACAGTACATGTATGGGATGCGTGTGACGCAGGAGCCTCAACTCTATATCGGATC  
TGGGGAATCAGCCTCAGTGCAATGGGCTGTTGCTAATCTAACCTGCCTAGAGGCACAGCA  
AAATATATCTGGATATGCTTGTGTTAGCATCAATAGCACATGCTTGGGTGTCAACTCAAC  
AGATGATTACATTGGGTATCGGTGTAGTTGCACACTTGGCTTCCAAGGAAATCCATATAT  
CCAAGATGGTTGCCAAGGTTATAATCTCTGCCCTTCTCCCTCTCCCTTCCGATCTCGCTC  
TTTCTCTGATCTTACTAAGTGATGTTGCAGATATTAATGAATGTTTGGTGCCAAACAAAT  
GTAAAGGAGTATGCTACAATACTCCTGGAAGTTACCGTTGCACTGCTTGCCTGATAAAA  
CACAGTATGATATGACAACAATGCAGTGCACCCGGACAAGAAGACAAAGTCTTATGTTAG  
GTGAGGTCCAGAGTCTTATACACTCTTGATCTTATAATGAACATGACAACATACTAACGA  
GCATATAAACTATTACAGGTGTTGTCTATTGGACTTAGCTGTGGCTTCAGCATCCTACTTC  
TCAGCTTAGGAATAATGCTTCTCATTATAGATGGAAAAAGACATACAAAAGCAACTAC  
GAAGGAAGCATTTCCAAAAGAACCAAGGACTTCTGCTGGAACAATAATATCTTCGGATG  
AAAATGCAAGTGAGAACACAAAGATATTCTCTTTAGATGAGCTAGAGAAGGCAACAAACA  
ACTTTGATCCTACACGTATTCTTGGTCATGGAGGGCATGGCATGGTGTACAAAGGCATTTC  
TATCTGACCAACGTGTGGTTGCAATAAAAAGGTCTAAGCACATTGAGGAAGGAGAGATCA  
GTCAATTCATTAATGAGGTAGCAATTCTGTCTCAAATAAATCATCGAAATATAGTGAAAT  
TATTTGGATGTTGTGTTGAAACCGAGGTCCCATTATGGTATATGACTTTTATCCCAATG  
GTTTCATTATTTGGTATTCTCCATTCTGGTTCAAACAATGGTTTCTCCTTGTCTGAGGATG  
ACTGCCTAAGAATTGCAGTGGAAGCTGCAGGAGCTCTCTATTATCTCCATTGCGCAGCTT  
CAGTATCAGTGTTCCATCGTGATGTGAAATCCTCTAATATACTTCTAGATGCAAACTACA  
CCGCTAAAGTATCAGACTTTGGTGCTTCGAGATTGGTTCCCATTGACCAAACTCATGTTG  
TCACAAATGTACAAGGCACATTTGGTTACTTAGATCCAGAGTATTATCATACCGGGCAGC  
TGAATGAGAAGAGTGATGTATATGTTTTGGTGTGGTACTTGTGGAACCTACTACTCAGAA  
AAGAGCCTATTTTTACAAGGGTGTGAGGATCAAAGCAGAATTTGTCCAATTACTTTCTCT  
GGGAACCTGAAGGTGAAGCCAATCACGGAGATTGTTGCTGCTCAAGTTCGTGAGGAAGCTA  
CTGACGAAGAGATAGAGAGTGTGCTTCTCTTGACAGATGTGCTTGAGGCTCCGAAGTG  
AAGATAGACCTACTATGAAGCAAGTTGAAATGAATTTACAGTTCTTGCGAACAAAAAGGT  
TGAACCTCATGCCCTGATGCTCTAGACAAAGCTGAAGAGATGCAGCCTTTGCTATGTACAA  
GATCTGAAGCTAGTTGTGCATCATTGGCGATTAACCTTGGGTGACAGTTATAACCCTGAGT  
CTCAAAGTAGCCACAAATGCTATAGCTTGGAGCAAGAGTTTAGTTTCATCAGTTGGGTTGC  
CACGGTAAGTTGCTCAGAGCCATGCTATAATATGAAATTCATTTAGCTGTGGAGGAAAA  
TGATTGGATGTTTTTCAGATCTAGACAGGTCTGA

>OsWAK32 gi |32977059|dbj |AK067041.1| Oryza sativa (japonica cultivar-group)  
cDNA clone: J013092H22, full insert sequence  
GAAAGCAAAACCTTCATGCTCATCGATATTACTCTTATCGCCAAACAGTCCACAAATCAAGCATCACAT  
TAAATTTTCGTAGCACTGAAGAGTGAAAACCTTCAGGTTGCCAAAGAAGCTGCAGTAATCTGACCATCGACT  
ATCCCTTTGGAATTGGATCATCCATTGCTCTAGGCAGCCCGATTTTCGAGCTCATCTGCAACAATACCAC  
ACAACCACCAAGGCTGTTATTCAAGAATGGCACCCTAGATCATTGACTCTCCAGTACTGAATATTTG  
GACGTTATGTTTTCCCATCTCCATGAAATCCAATGTGAGTGTGTACAACATGTATGGGATGCTC  
CTGGGAAATCTTTTACCCTTGGATATGCTAGACTAAACATCACCGGCTGTGATTTTCGATATATACCAGGT  
GCTCGATCAAAGTGGAATGTTCTGCCAAGCTTTGCAACGTTACATGCCCAACAGGGGAATCACAGAG

OsWAKs-Supplemental Data 1[1].txt

GACATTGCTAGGCAGGACTGCAATGGCACC GGATGCTGCTCCATCGATGTTCCAATTCGTGCTCAGACCT  
TACAGCTTATGTTTGTCCGCCATGGCAAAGGGGCGGTGCAACTTGACGCACAATCCAACCAAAGCTCCCT  
GTGGAGCACAATCAATGTAACAACAGTTTACGCTGTCAATTTGTGGAGAATCCTGGACCAACCGACGTGT  
GCCAGCACCTTCGATAACAGGACCAACTATGCCTGTATTAGTGAGCACAGCAAATGCATGGATGGCTATT  
TCGCACCGATTCTTGGTTACAATTGCTTATGTGATGGTGGGTACCAAGGAAATCCATATATACTAGATGG  
CTGCTCACGTGATAGAGGATATAATCCATTCCAACAGAAGGATGTCTGCGACAGAAAGTGCGGGAGCATT  
GATGTCCCATATCCATTTGGCCTAGAAGAAGGGTGCGCTGCAAGGAAATCATTTTCAGCTAAACTGCACAA  
ACATGTTATCGTCCAGCCTCCAACCTGAACGATGAATACCATGTAACGTATATAAATGTCAGCAATGGGCT  
CATGGGCGTAGAAGACACCACAGATTACAAACAGTACATGTATGGGATGCGTGTGACGCAGGAGCCTCAA  
CTCTATATCGGATCTGGGGAATCAGCCTCAGTGCAATGGGCTGTTGCTAATCTAACCTGCCTAGAGGCAC  
AGCAAAATATATCTGGATATGCTTGTGTTAGCATCAATAGCACATGCTTGGGTGTCAACTCAACAGATGA  
TTACATTGGGTATCGGTGTAGTTGCACACTTGGCTTCCAAGGAAATCCATATATCCAAGATGGTTGCCAA  
GGTTATAATCTCTGCCCTTCTCCCTCTCCCTTCCGATCTCGCTCTTTCTCTGATCTTACTAAGTGATGTT  
GCAGATATTAATGAATGTTTGGTGCCAAACAAATGTAAGGAGTATGCTACAATACTCCTGGAAGTTACC  
GTTGCACTGCTTGCCCTGATAAAACACAGTATGATATGACAACAATGCAGTGCAACCGGACAAGAAGACA  
AAGTCTTATGTTAGGTGTTGTCATTGGACTTAGCTGTGGCTTCAGCATCCTACTTCTCAGCTTAGGAATA  
ATGCTTCTCATTATAGATGGAAAAAGACATACAAAAGCAACTACGAAGGAAGCATTTCAAAAGAACC  
AAGGACTTCTGCTGGAACAACATAATATCTTCGGATGAAAATGCAAGTGAGAACACAAAGATATTCTCTTT  
AGATGAGCTAGAGAAGGCAACAACAACCTTTGATCCTACACGTATTCTTGGTCATGGAGGGCATGGCATG  
GTGTACAAAGGCATTCTATCTGACCAACGTGTGGTTGCAATAAAAAGGTCTAAGCACATTGAGGAAGGAG  
AGATCAGTCAAAATCATTAAATGAGGTAGCAATTTCTGTCTCAAATAAATCATCGAAATATAGTGAAATTTAT  
TGGATGTTGTCTTGAAACCGAGGTCCCATTATTGGTATATGACTTTATCCCAATGGTTCATTATTTGGT  
ATTCTCCATTCTGGTTCAAACAATGGTTTCTCCTTGTGCTGAGTGCCTAAGAATTGCAGTGGAAG  
CTGCAGGAGCTCTCTATTATCTCCATTCCGGCAGCTTCAGTATCAGTGTTCCATCGTGATGTGAAATCCTC  
TAATATACTTCTAGATGCAAACCTACACCGCTAAAGTATCAGACTTTGGTGCTTCGAGATTGGTTCCCATT  
GACCAAACCTCATGTTGTACAAATGTACAAGGCATTTGGTTACTTAGATCCAGAGTATTATCATACCGGG  
CAGCTGAATGAGAAGAGTGATGTATATAGTTTTGGTGTGGTACTTGTGGAACCTACTACTCAGAAAAAGAGC  
CTATTTTTACAAGGGTGTGAGGATCAAAGCAGAATTTGTCCAATTACTTTCTCTGGGAACCTGAAGGTGAA  
GCCAATCACGGAGATTGTTGCTGCTCAAGTTCGTGAGGAAGCTACTGACGAAGAGATAGAGAGTGTGCT  
TCTCTTGACAGATGTGCTTGAGGCTCCGAAGTGAAGATAGACCTACTATGAAGCAAGTTGAAATGAATT  
TACAGTTCTTGCGAACAAAAAGGTTGAACCTCATGCCCTGATGCTCTAGACAAAGCTGAAGAGATGCAGCC  
TTTGCTATGTACAAGATCTGAAGCTAGTTGTGCATCATTGGCGATTAACTTGGGTGACAGTTATAACCCCT  
GAGTCTCAAAGTAGCCACAAATGCTATAGCTTGGAGCAAGAGTTTAGTTTCATCAGTTGGGTGGCACGGT  
AAGTTGCTCAGAGCCATGCTATAATATGAAATTC AATTGAGCTGTGGAGGAAAATGATTGGATGTTTTCA  
GATCTAGACAGGTCTGAAATGTATCAACTCCTCAATGTGGTCTACCATTTTTATTAATTATTATCCCAAAT  
AATGTACAATTCCTTTTATATCTCTTAGGTACCAAGTATCATGTATGCTAGAGCACTTGTTTATAACAA  
CAGGATTAGTCTGATGCGCTATTATGCTGATACTGTGATTGCTCATAACATGCGTACACTTCTTTGTTAT  
GAGAAGCACATACTTCCAATGTGGGTGTTTCAAAGTTTAGTCCCATGTATAAAATATATGATGAATATA  
TCTAGGTGAGAAATTGGTTGGAAAATACTACAAGGAAATGCTATATATTTTCAACATTGCTCAACCGATT

>OsWAK33, 3230.t00013, Chromosome 4, pre-processing

ATGGCAACGCTCGCGAGCTGCCCAAGAGTTGTGGGCAGATGAGCATCCACTACCCCTTC  
GGAATCGGAGCAGGCTGCTTCCGTGAGCTGACTTCAACCTCATCTGCGACAACCTCCACT  
CAGCCCCCAAAGCTCCTCTTGCTGATGACGGCGTAACCGAGATCATCGGGGATACAGATTCC  
AGTTTTGACATGGACGTGGGCTCAACGGAGTCAATCGATGTCAACATTTCTCCACCATC  
CCTATGCTATCTAGCATCTCTCATTACAACCTATTCTTGAATCTCAGTTCTTTTTCTATC  
GAATATGTTATTCTGAACATTACTGGGTGCAACTTCGACACATATATCATTAACCCCGAC  
ACCGATATTGCGACAAGGATCTGCAGGAACAGTTGCCCAAGGAAGAAATCACAGAAGCA  
GTGGCTCGACAAAGCTGTAATGGTACTGGATGCTGCATATGATATTTACGGTGTTGCT  
AACTTGACAGCTCAGTTTCGTCCGTGGGGATGAAGGTTTACTTGGAGGGAACCTTAGTCTGA  
AACTCCTTATGGAACATAATCAACATAAGAAGCTGGTACGCCTATGTCACGTGGAGCATA  
ATCGATCAACCGACATGTGCTAGTGCAAAGGATAACCGAACGGATTACGCATGTGTGAGC  
GCCAACAGTACATGCATAGACAGCTTCAATTCTATGGAATATCTTGGCTACCTTTGTTAT  
TGCAGCAGTGGTTTTCATAGGCAATCCTTACGTACTTCATGGATGCACACGTGACGAAGGT  
GCTTTTTTACATACACATGACAACCTTGCAAGTTAATCTGTTTGGTTTGCAAAGCTTGCAAA  
TTTGATTTCTGGTTTATTTTCTATGTATCCCACTACTTATTTTTTCTGTCTATCAACTCC  
AAAGTACTATTTTTGTGATACTTATCTCGATTCTCAACGGACAAAACAGAGCAGTGTAGC  
CTTAATTTTAGTAGCTACCAAATCAATCATGTATTATGAGAACATAATTTGGAGTATGAT  
GTAGAGGGTCTCTTTAAGAGGAAATACTAAACTATTTTCCCTTTTGATGCATAAGAGTG  
ATGGTTTTATTTTCCATTTTTTTATCATATCGAAAATCTTGTAATGAAAAATACACGAT  
GTTTCAATAATTTGACGTGCACATGACTTTTTTACTTGGATAATATTATACATACTAA  
ATCTTCTAGTATTAGACGACATGTGTTAGTTGTTTTAAAATTAATTTCAACAGTGTAGCA

OsWAKs-Supplemental Data 1[1].txt

TCATTAAGATTGTGCAGGAAATTAACCTCGCATCAATTTTACAGAATGAATAAGATATT  
TTTAGATAAAATTGTTTACGTTTCCATCTAGAGAACGAATAGGTGTCTTCAGTTAATATG  
TAACTTTCATATATACATAGCTTTTTAAAGTTATCATTAAATGGTATAAAAGATGTTTGT  
TAGTAAGTATGAAGATTTTGTCTAGGTTCTTTGTTCTAAAAAATAATTTGAGCAAGCATG  
AAAGTTTATTAATCGTTGTAGCTAAAAGTCAATAGCATTACATCAACTATCATTAAATTTT  
GACATGGATATTGTACTCCTGAGTCCTGAGAAGCCCTTAATTTGGAGCTCAAATTTTCGT  
TGTAAGTCTACTAGCTTATCCTGGCACTGCAATAGTTTCACTCATGGTTTACAGTACTAACT  
ACTAAAAATTACTAGTAGTGAAGTTTCAAACTTTGTTCACTGAAATCAGGATATTATCC  
AGTTCAACAAAAGGCAAACTGCTCCCGACGGTGTGGGAATATCAGTGTTCCATTTCCCTT  
TGGGCTAGAGGAAGGCTGCGCTGCAAGAAAATTTCAACTCAATTGCACAAATGTGAC  
ATCTTCTACACTCCAATTTGACCGCGGTCTGTTGTGACAGACATAGATTTTGCAGAAGG  
GGTTGTTGGCATCAAATTTGCCTCATATTTTGAAGAGCAGGAGTTTCACTATGTATAGATC  
AGGAGAACCTGACCTATATGCAAGTTTTGGAGAAGCAGTGATCTCTGTGCAATTGGGCTGC  
TGCTAATCTAATGTCAAGAGGCCCAGAAGAACCCTCTCGATATGCATGTGTGAGTGC  
AAACAGCACATGTTTAGGTGTCGACTCTATTATGCTTATGTTGGATACCAAGTGCAAAAT  
GCATGGATGGTTTTTCAAGAAATCCATACGTCGTTAATGGTTGTGAAGGTATCCCGCTCT  
CCTTTCCCTTGTTTTTTTCATCATCCCCAATTGTTTTTCTCCACTCCCAAGAGTATTTGG  
TCTAAGTTACCTTTACATATTCTAGTAGTGTATTTTATTAGGGGACTGTCTATAGATCAT  
TTGACAAAAACCTCTTAGAAATCTTGCAATTTTGAACCATCCGATTGCTTTAAGATTC  
GTGACGGCAACCAACCCCTAAAACACCAACCCCTATCCCGATTCTCTCACGCCGCCGC  
TCTCCCTAGCGCGAGCGCGCCACCCTAGCGCGCGCGCTCCGCCGACGCCCGAGCGTGC  
CGCCGCCCGGCTGGCCGGAAGGTGTGAACAGCGCGGCAAGGCCTCTGGCCGGCCTCCT  
CCCCCTCCCCCTCCCCCTCGCCTCCCCTCCTCAGGCCATAGAAGGCGAGATAGATCGCC  
CGCCCCATTGTCTTCTCATCTCCGGTGACTCCTCGCCGCCGGATCCACCACAGTCGGCC  
ACCACAAGACACAACTCGCTATGCCCCGCCACCAACACCGGCCAACCGCCCTCCTCCA  
TCCCCGCGGCTCCGGTCTGCCGCCGACGCTCGCCGCCCGCCGTTTCTGCGCCACCG  
CCGGGCCGCCGCTCCACGACCATCCCTCTAAGCCCGGCGACCTCCCTTTCTCCCCAC  
CATCCACCCCTCCACCCACCCACCCAGGACCCTAATCCATTGGCCTTCCCGGAG  
TTTGGGTTGTTGCCGGCGCCGGAGAAGAAGAGGAGTTCTGCGGAGTTAGAGAAGAAGCAG  
CTGGAGCACGAATCACGAAGCACATCTAGTGAACCAAAATTTGTAACATTTGGAGGTAGG  
TTTTATGTGCACTGAAGTTTAGCAATTCGATTTATTAATGGATTGAGTTACACAATGCG  
GAGTGAGATGCATAATCTAGAAAATAGTGAGGCTCCTCAAACCTCGCATCAATTTATGT  
TGTGGTAGGCAAAAGTTACCGTTTTATTTTTCTTTTTGCAACAAGCAACAACTTTTTCT  
TCTCTAAATTCGAAATGTAGACAATCTAATGGGCCAAAGTTTCTCATAATTGTTATTGG  
GAGCAAGACTACCAATGATAATACCGTTTGAATTTTACTATTATGACCATCACCTCTATG  
TTTGTAATTTTATTCACGTTTCAAACATAGCATTTCATTTGATGAAGTTCTTATTGCA  
GATATTGACGAGTGCAAGAAAACACCTGGCATCTGCAAGGCATATGCCACAATGACATT  
GGGAGTTTACCATGATGGAGTGCCAGACAAAACAGAGTATGATGTGACAGCTATGCAG  
TGTGTCTCAAGAAAAACAAATCTTCTGATAGGTATGTTCTCAATGGTTTTCCACTTC  
TCAAACATACATTAACAAACAACTGATTCGGTGATAAAATCCTTTTAGGTATTGTAATT  
GGACTTAGTGTGGATTACCGTTTCTACTCTTTGTATTGGGTGGGATGCTTCTTCTCGT  
AGATGGAAAAGGGACATTCAAAGACAACCTACGAAGAAATTACTTTGAAAAAATCAAGGT  
CTTCTATTAGAACAACCTGATATCATCTGACGAAAATGCGAGCGACAAGACAAAAATTTTC  
TCCTTGAAGAGCTTGAAAGCGGACAAATAATTTTGACCCACACGTATCCTCGGACGT  
GGAGGGCATGGCATGGTATACAAAGGAATCTTATCTGATCAACGTGTGGTAGCCATAAAA  
AAGTCAAAGATAATTAAGCAAGATGAAATTGATAATTTTATCAATGAGGTTGCCATCCTC  
TCTCAAATAAATCATCGTAATATTGTAAGGCTTTTTGGATGTTGTCTTGAACTGAGGTC  
CCACTACTTGTTTATGACTTTATCCAAATGGTTTATTATTTGGAATTCTCCATGCTGAT  
GCACGTAGTAGTTTTCGGTTATCTTGGGATGACTGCTTAAGAATTGCCACTGAGGCAGCA  
GGAGCACTCTGTTATCTTCATTGACGAGTTTCACTATCAGTCTTTCATCGTGATGTGAAG  
TCAGCTAACATACTTTTAGATGCAAACTGCACAGCCAAAGTTTCACTTTTGGTGCTTCG  
AGATTGGTTCCCATTAATGAAACCCATGTTGTTACAAATGTACAAGGCACCTTTGGCTAC  
TTAGATCCAGAATACTACCACACCGGGCAATTGAATGAGAAAAGCGACGTCTACAGCTTT  
GGAGTTGTACTTATTGAGCTACTACTTAGGAAGGAACCTATTTTACAAGTGAAACAGGT  
ATGAAGCAAACTTGTGCAACTATTTTCTTTGGGAAAAAAGGTGAAGCTAATTAGGGAT  
ATAGTGGCTGATCAAGTTCTTGAGGAAGCAACCGAGGAAGAAATTAACAATGTTGCCTCT  
CTTGCGGAAGATTGCTTGAGTCTACGACGGGATGAAAGACCTACTATGAAGCAAGTTGAG  
TTGGCACTACAGTTTTTGTAAACAAAAGGTTGAATTCATACCGCACTGTTGAAGCAAAC  
AAGGAAGAGATGGATCCCTTTATTATGACAAAAGTTCAACATAGCACTGAGAATTCAAAT  
GTTGAATTTCTGAGCAATAAAGCAACTATATCGTCCTATCAGCCTGGCTTGAGCACGAG  
TTTATGTCATCTGCCACTATACCACGCTAG

OsWAKs-Supplemental Data 1[1].txt

clone: J013104F01, full insert sequence

GAGGATAGTCTGACCACCAACAGAAAGGAAAGAACATGAATCTCCTCTGTGCAATAGCAATACTCCCGG  
TGATTTCTTGTGGCCTTACTAGATACTATACCGCTGGCAAGTGCATCGTCTCTGATGAATCACAGCCAGCC  
ATCCATGGCAACGCTCGCGAGCTGCCCCAAGAGTTGTGGGCAGATGAGCATCCACTACCCCTTCGGAATC  
GGAGCAGGCTGCTTCCGTGAGCCTGACTTCAACCTCATCTGCGACAACCTCCACTCAGCCCCAAAGCTCC  
TCTTGCATGACGGCGTAACCGAGATCATCGGGGATACAGATTCCAGTTTTGACATGGACGTGGGCTCAAC  
GGAGTCAATCGATGTCAACATTTCTCCACCATCCCTATGCTATCTAGCATCTCTCATTACAACCTATTCT  
TGGAATCTCAGTTCTTTTTCTATCGAATATGTTATTCTGAACATTACTGGGTGCAACTTCGACACATATA  
TCATTAACCCCGACACCGATATTCGCACAAGGATCTGCAGGAACAGTTGCCCAAGGAAGAAATCACAGA  
AGCAGTGGCTCGACAAAGCTGTAATGGTACTGGATGCTGCACATATGATATTTACGGTGTGCTAACTTG  
CAGCTCAGTTTTCGTCCGTGGGGATGAAGGTTTACTTGGAGGGAACCTAGTCGAAACTCCTTATGGAACA  
TAATCAACATAAGAAGCTGGTACGCCTATGTCACGTGGAGCATAATCGATCAACCGACATGTGCTAGTGC  
AAAGGATAACCGAACGGATTACGCATGTGTGAGCGCCAACAGTACATGCATAGACAGCTTCAATTCTATG  
GAATATCTTGGCTACCTTTGTTATTGCAGCAGTGGTTTCATAGGCAATCCTTACGTACTTCATGGATGCA  
CACGTGACGAAGGATATTATCCAGTTCAACAAAAGGCAAACTGCTCCCGACGGTGTGGGAATATCAGTGT  
TCCATTTCTTTTGGGCTAGAGGAAGGCTGCGCTGCAAGAAAACCTATTTCAACTCAATTGCACAAATGTG  
ACATCTTCTACACTCCAATTTGACCGCGGTGCTGTTGTGACAGACATAGATTTTGCAGAAGGGGTTGTTG  
GCATCAAACCTTGCCTCATATTTGCAAGAGCAGGAGTTCAGTATGTATAGATCAGGAGAACCTGACCTATA  
TGCAAGTTTTGGAGAAGCAGTGATCTCTGTGCATTGGGCTGCTGCTAATCTAACATGTCAAGAGGCCAG  
AAGAACCTCTCGATATGCATGTGTGAGTGCACACAGCATGTTTAGGTGTCGACTCTACTTATGGTT  
ATGTTGGATACCGGTGCAAAATGCATGGATGGTTTTTCATGGAAATCCATACGTGCTTAATGGTTGTGAAGA  
TATTGACGAGTGAAGAAAACACCTGGCATCTGCAAGGCATATGCCACAATGACATTGGGAGTTATCAT  
TGCATGGAGTGGCCAGACAAAACAGAGTATGATGTGACAGCTATGCAGTGTGTCTCAAGAAAAAACA  
ATCTTCTGATAGGTATTGTAATTGGACTTAGTGTGGATTACCGTTCTACTCTTTGATTGGGTGGGAT  
GCTTCTTCTTCTGATAGTGGGAAAGGGACATTCAAAGACAACCTACGAAGAAATTAATTTGAAAAAATCAA  
GGTCTTCTATTAGAACAACCTGATATCATCTGACGAAAATGCGAGCGACAAGACAAAATTTCTCCTTGG  
AAGAGCTTGAAAAGGCGACAAATAATTTTGACCCACACATCTCTCGGACGTGGAGGGATGGCATGGTA  
TACAAAGGAATCTTATCTGATCAACGTGTGGTAGCCATAAAAAAGTCAAAGATAATTAAGCAAGATGAAA  
TTGATAATTTTATCAATGAGGTTGCCATCCTCTCTCAAATAAATCATCGTAATATTGTAAGGCTTTTTGG  
ATGTTGTCTTGAACTGAGGTCCCACTACTTGTGTTATGACTTTATTCAAATGGTTCATTATTTGGAATT  
CTCCATGCTGATGCACGTAGTAGTTTTCGGTTATCTTGGGATGACTGCTTAAGAATTGCCACTGAGGCAG  
CAGGAGCACTCTGTTATCTTCATTGACGAGCTTCAGTATCAGTCTTTTCATCGTGATGTGAAGTCAGCTAA  
CATACTTTTAGATGCAAACTGCACAGCCAAAGTTTCAGATTTTGGTGCTTCGAGATTGGTTCCCATTAAT  
GAAACCCATGTTGTTACAAATGTACAAGGCACCTTTGGCTACTTAGATCCAGAATACTACCACACCGGGC  
AATTGAATGAGAAAAGCGACGTCTACAGCTTTGGAGTTGTACTTATTGAGCTACTACTTAGGAAGGAACC  
TATTTTTACAAGTGAAACAGGTATGAAGCAAACTTGTGCAACTATTTTCTTTGGGAAAAAAGGTGAAG  
CTAATTAGGGATATAGTGGCTGATCAAGTTCTTGAGGAAGCAACCGAGGAAGAAATTAACAATGTTGCCT  
CTCTTGGGGAAGATTGTTGAGTCTACGACGGGATGAAAGACCTACTATGAAGCAAGTTGAGTTGGCACT  
ACAGTTTTTGTCTAAACAAAAGTTGAATTCATACCGCACTGTTGAAGCAAAACAAGGAAGAGATGGATCCC  
TTTATTATGACAAAAGTTCAACATAGCACTGAGAATTCAAATGTTGAATTTCTGAGCAATAAAGCAACTA  
TATCGTCTATCAGCCTGGCTTGGAGCAGGATTTATGTCATCTGCCACTATACCACGCTAGAATTTATT  
CAGTTTCCAGTTCTGTGCTAGGCCATGATGCCTGTTGTTTCTCTTGACAATGTGAGATAATGTACCTTCA  
ATATACTGCACGTTTTAATTTGAAGTACACTTGAATAAGGCAAAATACTGTGTAAAAAATTATTTAATT  
TTATAAAGTTATTCCGGTGAATGGAC

>OsWAK34, 8323. t00010, Chromosome 4, pre-processing

ATGGCAACGCTCGCGAGCTGCCCCAAGAGTTGTGGGCAGATGAGCATCCACTACCCCTTC  
GGAATCGGAGCAGGCTGCTTCCGGCAGCCTGACTTCAACCTCATCTGCGACAACCTCCACT  
CAGCCCCAAAGCTCCTCTTGCATGATGGCACCACCGAAGTCGTCGGAGATGAAGATTCA  
CTACGCGGACCAAGTCACTCTGACGGGCCAAACCTCACCTTTGACGGGTTTGGTCT  
TGGTCAGTGATTAGTGGTCACTGATGACAAAATCACCTGTGACGGATGAAACACCCGTCA  
CAGATAACCCATCTCTGACCGGTATATAAGTCATCTCTGATGGGTTAAACTTGTCAACC  
GTCACAGATGAGTCATCAGTGACGTGTCGTAACCTACCTGACCGTCACTGATGACTCATCT  
CTGACGGGTTGTAACCTACGACCCGTCACTGATGACAAAGTAAGAAATACAATTTTGAA  
TTTTAAACGCAACAAAAAACCTCAAAAAAATATTTTGAATTTTACTAGCCATCCTATAC  
ATGGTTACATATCACTACCTACAAATTCACAAATTTTACGCAATATAACTTGTAGCGAT  
TCGAACCTCAAGACCTCAACCTCCATATAGAGCTCCCTTACCAACTCACCTACTCAACACA  
TATTGACTACTAACCCAATGTTATTATTTTGTCTATGCTTATCTGAATCATTTAACATAT  
ATTTAACACCCTAAATGACTTCAATGAAAATATTATCAACTAAATAGTTATAGATCTCA  
TCGTGTTTTATAACTTTTACATAGAAAATATCTTCATCCGATGTTGTTTGAAGAATTCAA  
AATTTCAATTTTCAAAATATATCTCACTTTATAACATGTAATTTTGTGAAATGAAAATA  
TTTTCAATTATAATGTTGTAGATCTGATTGAGTTCTATGACTTTGATACGGGGCATGTAT  
CCATCCATGTCATTTGAAAAAAGCTCAAAATTTTGTTTTTAAAGTAGATCTGATCACT

OsWAKs-Supplemental Data 1[1].txt

TGTAATGCATGTTCTGGGGATGTAAACGATCTCTAATAGAAATGTTGTTAGTTATAAAGTT  
 GTGGATATCATTGAGAGCTACAACCTTTTATATAGGACATGTTTCAATCCGAGGTTTTTTG  
 CAAAATTTTAAAAATTTGAATCCGAGTTTTGCTTCCAACCCGTCAGTGGTATCCGCTCACC  
 TGTGACGGGGCCAGAAATGAAAGCCGTCACAGGTGCGGGCCATCACCTCTGACGGCTTCTA  
 ATGTATCGGGCCATCACAGGTGAGGGGATACAGTGACGGGTTGGAAGCAAACTCGTCG  
 CTGGTATACCTCTGACGGGTTTTCTTTTCGGCCCGTCACAGGTGAGGGGATACCTGTGAC  
 GGTCCGCGGGCCGGATGGCTCACCGGTGACGTTATCCCGTCTGACCCGTCAGAGGTAATGG  
 TCACTAGTGACCAATCGTTTTGCCCGTCACAGGTATCCCGTCAGAGGTGTGAGGATCTGG  
 CGTAGTGATTCAGTATTGGCATGGACGTAGGATTATCGGAGTGGATCGATATCAACATT  
 TCTGCCACTATCCCTATGGTACCTGGCGTTGCTGAGTACAATTATTCATGGAACCTTAGT  
 TCTTTAGTATCTTTGATGCTTCTCTGAATATTACTGGTTGCGAGTTCGACACATATATA  
 ATCAACAACAAGAGCTATAGTCCCACTACAGCAATCTGCAAAAGTAGCTGCCCAACAAA  
 GAGATCACTGAAACGGTAGCTCGACAAAGCTGTAATGGTACTGGATGCTGCACAATTTAT  
 GTTGAATAGATGTTGCTAACTTGCATCTCCGTTTCGTCGCCATGGCAGAGAAGGTTTT  
 CTTGGAGTGAACCTAGTCGAAGCTCCTTATGGAATAGAATTAACATAGTTAGCAGTTAT  
 GCCAGCGTTATGTGGGGGATAAACAATCGACCGACGTGCGCTAGCGTAAAGGATCAGAAC  
 CAAACGGATTATGCATGTGCGAGCGCAACAGTCAATGCGTGGACAGCATCTCATCTACC  
 GATCTTGGCTACCGCTGTGAATGCAACAGTGGTTATATCGGCAATCCTTATGTACTTGAT  
 GGCTGCACACGTGACGAAGGTGATTTATATATATACTCCACCAGTACGTCTGCAATAA  
 GTCTGTTTTGCCCTTCGATGATTGTTGCAAATTTGATGCTGATCTATTTTTCTACGTACCT  
 CTCTTATTTACTCTTTATGTATTTCAATTTGGGAAAGTGAATTCATCCCTCGAGGGGATAT  
 CCCTCGTTTTGTGCATGTACCTAAATAGTTATAAAAAAATATGAAAAAATTGACAACA  
 TAGATTAATATGAAATATATCACTCGACAAACATGCAAGTTTAATTTCACTTCTACAAG  
 TTGTAACAAAAATAACAAATATAGTTGCGAATGTGCGATAACTATTTTCAGTTTAATTTG  
 TTATTTTTGTTGCAACTTATAGAAGTTGAATTTGGTCTTGCATGTTTGTGGAGTGATATA  
 TTTTATATTAATCTATGTTGTCAATTTTTTCAAATTTTTTGATAACTATTTAGATGACA  
 TGCAAATAACGAGGGGGGTGCCCCCTCGAGGGATGAAAAATCCACATCCATTTCAATTTCAA  
 AGCATTAGTATTGTATGATAATTTATCTGAACGAACAAAACCTTTGTGAGGCTTGGCATT  
 CATTCAAGTCCACTAGCTTTCTGTTTTACTTGAGTAGTTGCATCATATTGTTTATGCTAA  
 CTATTAAGAGTACTAAATGTGTCAAGCGCTAGTGGTGAGGTTTATGAACCTTTGTTGCTG  
 AAAGCAGGCTATCACCCAGTTCAACAAAAGGCAAACCTGCTCCCGATGGTGTGGGAATATC  
 AGTGTTCATTTCTTTTTGGTCTAGAGGAAGGCTGCACTGCAAGAAAAATTTTGAATC  
 AATTGCACAAATGTGACATCTTACGCTCCAATTTAACCAGCGGTGATGTTGTGACAGAC  
 ATAGATCTCGCAGAAGGGGTTGTTGGCATCAAACCTTATTACCTCATATTACGTAGAGCAG  
 GTGTTTAGGATGTACATATCAGGAGAACCTTACCTATATGCAAGTTTCGGAGAAGCAGTG  
 ATCTCTGTGCATTGGGCTGCTGCCAATCTGACATGTCAAGAGGCCAGAGAACCCTCT  
 CGATATGCATGTGTTAGTGCAACAGCACATGTTTAGGTGTCAACTCTACTGATGGTTAT  
 GTTGGATATCGGTGCAATGATGGATGGTTTTTCATGGAAATCCTTATGATGCTAATGGT  
 TGTGAAGGTATGCTACTGCTTTGCCATGTTTTTGTGTCATCCCAAGTGTTTTTCAACC  
 ACTCCCTAGAGTATTTGGTCTAAGGTTTCTTTACATATTCTAGTAGTGATTTTTTTATTA  
 ATGGATTGAGTTGCACAATGCGGAGTGAGATGCATAATCCTAGAAAATAGTGAGGCTCCT  
 CAAACCTCGCTTGAATTTATGTTGTGGTGGGCAAAGGTTACCCTTTTTTTTTTGAACAA  
 GCAACAAACTTTTTTTCTCTAAAATTTGCAATGTAGACAATCTAATGGGTGCAAAGTTT  
 CTCATAATTGTTATTGGGAGCAAGACTACCAATGATAATACCGTTTTGAATTTTACTATTA  
 TGCACATCACCTCTATGTTTGTAAATTTTATTCACGTTTCAAACATTGCATTTCAATTTGA  
 TGAAGTTCCTTATTCCAGATGTTGACGAGTGCAAGAAAACACCAGGCATCTTCAAAGGCA  
 TATGCCACAATAACATTGGGAGTTACCAATGCATGGAGTGCCTAGACAAAACAGAGTATG  
 ATGTGACAGCTATGCAGTGTGTTCAAGAAAAAACAATCTTCTGATAGGTATGTTCT  
 CAATTGTTTTCCACTTCTCAAACCTACGTGAAAACAAAACACTAATTCGGCGATAAAATCC  
 CTTTAGGTATTGTAATTGGACTTAGTGTTGGATTACCAATTCTACTCTTTGTAATGAGTG  
 GGATGCTTCTTCTCGGAGATGGAAGGGGACATTCAAAGACAATTACGAAGAAATTACT  
 TTCGAAAAAATCAAGGTCTTCTATTAGAACAATAATATCATCCGATGAAAATGCGAGCG  
 ATAAGACAAAAATTTTCTCCTTAGAAGAGCTTGAAAAGGCGACAAATAATTTGACCCCA  
 CACGTATCCTCGGACGTGGAGGGCATGGCATGGTATACAAAGGAATCTTATCTGATCAAC  
 GTGTGGTTGCCATTAAGGCAAGATAATTAAGCAAGATGAAATTGATAATTTTATCA  
 ACGAGTTGCCATCTCTCTCAAATAAATCATCGTAATATCGTAAGGCTCTTTGGATGTT  
 GTCTTGAAACTGAGGTCCCACTACTTGTCTATGACTTCATTCCAAATGGATCATTATTTG  
 GAACTCTCCATGCTGATGCAAGTAGTAGTTTTCAATTATCTTGGGATGACTGCTTAAGAA  
 TTGCCACTGAGGCAGCAGGAGCACTCTGTTATCTTCATTGAGCAGCTTCAGTATCAGTCT  
 TTCATCGTGATGTGAAGTCAGCTAACATACTTTTAGATGCAAACTGCATAGCCAAAGTTT  
 CAGATTTTGGTGTTCGAGATTGGTTCCCATTAATGAAACCCATGTTGTTACAAATGTAT  
 AAGGCACCTTTGGCTATTTAGATCCAGAATACTACCACACCGGGCAATTGAACAAGAAGA  
 GCGATGTCTACAGCTTTGGAGTTGTACTTATTGAGCTACTACTTAGGAAGGAACCTATTT

OsWAKs-Supplemental Data 1[1].txt

TTACAAGTGAAACAGGTTTGAAGCAAACTTGTCAAACATATTTCTTTGGGAAAAAAGG  
TGAAGCTGATTAGGGACATAGTGGCTGATCAAGTTCTTGAGGAAGCAACTGAGGAAGAGA  
TTCACACTGTTGCCTCTCTTGGGAAGATTGCTTGAGTCTACGCCGGGATGAAATACCTA  
CTATGAAGCAAGTTGAGTGGGCACTACAGTTTTTGTAAACAAAAGGTTGAATTCATACT  
GTACTGTTCAAGCAAAACAAGGAAGAGATGGATCCCTTTATTATGACAAAAGTCCAACATA  
GTACTGAGAATTCAAATGTTGAATTTCTGAGCAATAAAGCAACTATATCGTCTTATCAGC  
CTGGCTTGGAGCACGAGTTTATGTCATCTGCCACTATACCACGCTAG

>OsWAK34, 8323. t00010, Chromosome 4, post-processing  
ATGGCAACGCTCGCGAGCTGCCCCAAGAGTTGTGGGCAGATGAGCATCCACTACCCCTTC  
GGAATCGGAGCAGGCTGCTTCCGGCAGCCTGACTTCAACCTCATCTGCGACAACTCCACT  
CAGCCCCCAAAGCTCCTCTTGCATGATGGCACCACCGAAGTCGTCGGAGATGAAGATTCA  
CTACGCCGGACAGGTATCCCGTCAGAGGTGTGAGGATCTGGCGTAGTGATTCCAGTATT  
GGCATGGACGTAGGATTATCGGAGTGGATCGATATCAACATTTCTGCCACTATCCCTATG  
GTACCTGGCGTTGCTGAGTACAATTATTCATGGAACCTTAGTTCTTTTCAGTATCTTTGAT  
GCTTCTCTGAATATTACTGGTTGCGAGTTCGACACATATATAATCAACAACAAGAGCTAT  
AGTCCCACTACAGCAATCTGCAAAAGTAGCTGCCCCAACAAAGAGATCACTGAAACGGTA  
GCTCGACAAAGCTGTAATGGTACTGGATGCTGCACAATTTATGTTGGAATAGATGTTGCT  
AACTTGCATCTCCGTTTCGTCGCCATGGCAGAGAAGGTTTTCTTGGAGTGAACCTCTAGT  
CGAAGCTCCTTATGGAATAGAATTAACATAGTTAGCAGTTATGCCAGCGTTATGTGGGG  
ATAAACAATCGACCGACGTGCGCTAGCGTAAAGGATCAGAACCAACGGATTATGCATGT  
GCGAGCGCCAACAGTCAATGCGTGGACAGCATCTCATCTACCGATCTTGGCTACCGCTGT  
GAATGCAACAGTGGTTATATCGGCAATCCTTATGTACTTGATGGCTGCACACGTGACGAA  
GTACTAAATGTGTCAAGCGCTAGTGGTGAGGTTTATGAACTTTGTTCGCTGAAAGCAGGC  
TATCACCCAGTTCAACAAAAGGCAAACTGCTCCCGATGGTGTGGGAATATCAGTGTTC  
TTTCCTTTTGGTCTAGAGGAAGGCTGCACTGCAAGAAAATTATTTGAACTCAATTGCACA  
AATGTGACATCTTCTACGCTCCAATTTAACCGCGGTCATGTTGTGACAGACATAGATCTC  
GCAGAAGGGGTTGTTGGCATCAAACCTTATTACCTCATATTACGTAGAGCAGGTGTTTAGG  
ATGTACATATCAGGAGAACCTTACCTATATGCAAGTTTCGGAGAAGCAGTGATCTCTGTG  
CATTGGGCTGCTGCCAATCTGACATGTCAAGAGGCCCAGAAGAACCCTCTCGATATGCA  
TGTGTTAGTGCAAACAGCACATGTTTAGGTGTCAACTCTACTGATGGTTATGTTGGATAT  
CGGTGCAAATGCATGGATGGTTTTTATGGAATCCTTATGATGCTAATGGTTGTGAAGAT  
GTTGACGAGTGCAAGAAAAACACCGCATCTTCAAAGGCATATGCCACAATAACATTGGG  
AGTTACCAATGCATGGAGTGCCTAGACAAAACAGAGTATGATGTGACAGCTATGCAGTGT  
GTTTCAAGAAAAAACAATACTTCTGATAGGTATTGTAATTGGACTTAGTGTGGATTCT  
ACCATTCTACTCTTTGTAATGAGTGGGATGCTTCTTCTCGGAGATGGAAAAGGGACATT  
CAAAGACAATTACGAAGAAATTACTTTGAAAAAATCAAGGTCTTCTATTAGAACAACTA  
ATATCATCCGATGAAATGCGAGCGATAAGACAAAAATTTTCTCCTTAGAAGAGCTTGAA  
AAGGCGACAATAAATTCGAGCCACACGTATCCTCGGACGTGGAGGGCATGGCATGGTA  
TACAAAGGAATCTTATCTGATCAACGTGTGGTTGCCATTAAGGCAAGATAATTAAG  
CAAGATGAAATTGATAATTTTATCAACGAGGTTGCCATCCTCTCTCAAATAAATCATCGT  
AATATCGTAAGGCTCTTTGGATGTTGTCTTGAAGTGAAGTCCCCTACTTGTCTATGAC  
TTCATTCCAAATGGATCATTATTTGGAACCTCTCATGCTGATGCAAGCACCTTTGGCTAT  
TTAGATCCAGAATACTACCAACCGGCAATTGAACAAGAAGAGCGATGTCTACAGCTTT  
GGAGTTGACTTATTGAGTACTTATAGGAAGGAACCTATTTTACAAGTGAAACAGGT  
TTGAAGCAAACTTGTCAAACATTTTCTTTGGAAAAAAGGTGAAGCTGATTAGGGAC  
ATAGTGGCTGATCAAGTTCTTGAGGAAGCAACTGAGGAAGAGATTCACTGTTGCCTCT  
CTTGCGGAAGATTGCTTGAGTCTACGCCGGGATGAAATACCTACTATGAAGCAAGTTGAG  
TGGGCACTACAGTTTTTGTAAACAAAAGGTTGAATTCATACTGTACTGTTCAAGCAAAC  
AAGGAAGAGATGGATCCCTTTATTATGACAAAAGTCCAACATAGTACTGAGAATTCAAAT  
GTTGAATTTCTGAGCAATAAAGCAACTATATCGTCTTATCAGCCTGGCTTGGAGCACGAG  
TTTATGTCATCTGCCACTATACCACGCTAG

>OsWAK35 9632. t02248, Chromosome 4, pre-processing  
ATGGTGATTGAAAGAATTGGAAGCCAGGTGGAAAGAGAGAGCAAAGTTTTGGTTCACATGT  
AAAATTAATAGTGAAGTGAAGTGAAGTGAAGTGAAGTGAAGTGAAGTGAAGTGAAGTGAAG  
TAGTCTTGACAGTAAACCTTGACAATTTTCTTGACAGTATTGACAATCACTGACTTTTACAT  
TTCCAGTGGCCCTGTGGCCCTGTCCAGACTCCAGATGCTTATAAAGCAGCAAGACCAT  
GACCTAGATATGGATGAAAACCCATTGTACTCATTGCAATGCTTCTCCGTTCTCCAC  
ATATTTTTCACAGCTCAAGCTCTGAACTTCTCTAGGGCAACAATGCTAAGCACTATAAAG  
ATGATCGACATGAGCCCTTTCAGTTTCAGTGGTTCTCTGCTCCTATTCTGTTGTTTTCT  
GCAGTGAATCCAACATGTGAGTATCCAGCGTCCAGGAAATCAAGGTATCAACAGCACCC  
ATTCTTCTTCTGCGGCCACTCTGGAAGGCTGCCACGGAGCTGCGGCAACCTGAGCTTC

OsWAKs-Supplemental Data 1[1].txt

GACTACCCATTTCGGCATTGGTTCTGGCTGCTTCAGGAACCCAGACTTCAATCTCACCTGT  
 GACAACACCGCACAAACCACCTAGGCTCTTCTGCAGGGTGGGACAGAGGTTATCGAAGAT  
 ATTGATGCTATTGTATACGGTAGCACCTCAAACCTACCTATTTATGTATGTCACCGTTGAT  
 TTTTCCCATGCAATCCCAGTAAGTCCAGGTACCAAAGATTATAACATGTCCTGGAAAGCC  
 CCAGGGAGATCTTTTACTCTTGATAATGCCTTGCTAAACATTACTGGCTGTGACTTTGAT  
 ATATACCTGCTTGATCAAGACAGAAATAGCGCTGTGAGGCTCTGTACAGTTACTTGCCCC  
 AACGAAGAAATCACGGAAAAGGTGGCCAGGCAGAACTGCAATGGTACAGGGTGTGTACC  
 ATCGAGTTATTTGAGGCTACTCTCAGTGCATTCCAGTTCAAATTTGTCCAACACAGCAAA  
 GGTGGGCTCGAGGCACAAAACAAACAGAAGCTCTTTATGGGACAGAATCAACATAACAAC  
 ATCTATGCTAGCCTGTCTGGAGTATCGTCGATCAACCAACATGCGCCAGCACAAGGGAT  
 AATAGGACCAACTATGCCTGCGCCAGCAGCAAAAGCAAGTGTGTGAGAGCTATGGATTA  
 CCTGATCTTGGTTACCTCTGTGGATGTGATAGTGGATATTGGGGAAACCCATACATACCC  
 AATGGTTGCCAGCGTGATAACGGTAATTCACCCCGCTATGGAACTATATATATGCAGCT  
 GTGTGAGAAAAAACTATATGCATGAATAAATCTTATTCTTTAAACTAAACGAAAA  
 GTTTCAGTTAAACATGGATGTAGCTATACCTATTTTCGAAATGTCCTCCAGTACACAACAC  
 TGCTGACAGCATTTATATATTTAGAGCAAGTTAAAACATGTACTAACAAAAAACTTGTGC  
 AAAATTAGTACATATATGCTATACATAAAAAATATAAATAACTTGTACTATCTTTTTTCT  
 AATTTGTACATATATGTAGTACAACATGATGTACATATATGATTTGTACTTCACCAATCA  
 TGAGTACAACATGATTGGTGAAGTACTCACTGCACAGGAGTGAATCCAAATCTTAAGT  
 ATAGCAACACTCATGCTTGGAAAACTGTACTCAGATATATATGCATAACTTTGTCATAT  
 CAACAATAACCATATTTTAAATTAAGTGAAGAAGTGAATTTATCTATTTCGAGTAACT  
 TACTTACAAACATCTTATCATATAAAGTAGGATATATTCAGCTCAGCAGAAGGCAAACT  
 GCTCCCGATCGTGTGGGAACATCAGTGTTCATTTCTTTTGGGTTAGAAGAAGGATGCT  
 TTGCAAGGAAGCTATTTTCAGCTTAACTGCACAAGTGAACATCCTCTAGCCTCCAATTTG  
 ATGATGAGCATCAGGTGACATACATAAATATCAGTGAGGGTCTTGTGGGCATTAGATATA  
 CATCTAATTATGAGCAGGAGGAATTTAAAGTCTATGTACCTAAGCAACCAGATCTCTATA  
 TTGGATCTGGCGAATCATCGTCTGTGCGATGGGCTGTTGCCAATCTAACGTGCCAAGAAG  
 CAAAGCAGAACTACTCCGGATATGCATGTGTTAGCATCAATAGCACATGCTTGGGGGTAA  
 ACTCTACAGATGGTTACATTGGTTATAGATGCAATGTTTGCCTGGCTTTCAAGGAAATC  
 CATATGTGCAAAATGGCTGTCAAGGTACTCTCTCTCACACAACTCCATTATTTACATTT  
 AACTCACTATAACAAACATTTGAATGCTTATAACACTAAGAATGGATATAATTATTTAAA  
 AAAATTTAATGTACTTCAATAGTGGTACTGGTACAGAAAAAAATCACGAATTTTCATG  
 CTTTTATGCTGGATCATGATTATAACAGTTTTTGGTATACTATTTGGATGTATGTTACAA  
 AGTACTGACAAGTACTTCGAAGCAAGAGGAGCATCTAAGTGAGGCCAAAGCCATAGAGGT  
 TCCTAGCTTGGCTATATTCTTGCTTAAATTAATATGTTTTCTAATAACTTATACATTAA  
 AATCTTATTCTGGAACAGAGCTATTTTCTAGAAAAATATATCAGCATTTTAATTCGCAT  
 GCATAATCGTTGTAGAAAAATACCGAGAGAAATCCGATTCTTACGAGCCCATGAATACT  
 ATGAAATCTTGTAGCACACATCCCTCTGCATTTTACAAATTTTAGTTTCATAGCATTGCCT  
 AGATGTTCTATTTTATACAAATTATCTGCCTCTAAGATTCTGTTCCACCTAAAAGCAGAAC  
 ATATTTTTTTTTTGTCCATATTTTCCAGCAACAAACAAACAACTACATTCTGTCCATCA  
 TTTTATCAAAAGTTTCGGTTGAATAAAAAAGTATGATTTTTCCCCTGCGCTCCAATTAG  
 GGAATCATTACTCTCTTGAGGTAATCTAGGATTGTTTTACTAGTCATCAACCCATGCT  
 CCTCCATTACTAGTAGTACTAAATATCACCTACATGATATACTTGAATTTTGAAGTTTTA  
 TTTCTATCAGTATTTTCAACTTTAAGGAACATGCACATACCTTAATCATGTTAAGTAAAA  
 TGCCTTCAGCTACGGGGCTTAAAGCTGTAGCTATTTTTCCGTTATTTTTGAAAAAAA  
 AAATGGAGCGATTTTAGGGGCATGAGCTGGGCTTCCAGTAAAACACCATTTTGGTCTAC  
 ATAATCTGTTTCCATTGTTGCATGTATTCATTTAATAAATACTAATTGTTTCTAATCCTA  
 CTGGAGTCCAAACGCAAGCAAAACAATGTTCTTTGCTGTGAGGATCCAAACGCAAGCAAA  
 CAATGTGTATACTTGGATTCAACCTATTATAAAGATCTTTTTCTTTTATAGTTAAAGTGA  
 GAATCTCTATGTTTTTACCTCCTAAAATTAAGGTGAGGTCTTCTAGGAGAGCCTAGTAA  
 GAAATATGTCTCCAAAGCAGCTGTATCCTGTTACGAATGTCTGTCTCATCTTACTGAGTT  
 GTGGTTGCAGATATTGATGAGTGCAACACCCCGGGCATCTGTAAAGGAGTATGCCATAAT  
 ACCATAGGAACTACTATTGCACTGATTGTCTTATAAAACACAGTATGATACTATAGAA  
 ATGAAGTGCATTTCAATAAGAAAGCAAAATATTCTGCTAGGTGAGTTCTATGCACATGTT  
 AATTTCAATGAATGAATGAATCAGATAATTATGGCCAATTAAGGGGCATACTGCATATT  
 ACAGGTATCATTATTGGGCTAGTGTGGTTTTGGCATTCTACTTGTGAGCTTAAGTGCA  
 ACATTTATCTGCCGTAGATGGAAGGGGACATCCAAAAGCAACTACGTGCGAAGCATTTT  
 CAAAAGAACCAAGGTCTTCTCCTAGAACAACTAATATTGTGCGATCAAAATGCAACTGAC  
 AAGACAAAGATTTTCTCTTTAGAGGAGCTAGAGAAAGCAACAAACAACTTTGATTCTACA  
 CGTATCCTTGGTGTGGAGGGCATGGTATGGTGTACAAAGGTATTTTATCTGATCAACGC  
 GTAGTTGCAATAAAAAAGGTCTAAACACATTGAAGAAGGTGAGATCAGCCAATTTATCAAT  
 GAGGTTGCTATTCTCTCTCAATAAATCACCAGAAATATAGTAAAATTTTGGATGTTGT  
 CTAGAAACCGAGGTCCCGCTGTTGGTATATGACTTTATTCCAATGGGTCATTATTTGGT



OsWAKs-Supplemental Data 1[1].txt

GTTCTGCATTCTGGCTCAAGCAGTGATTTCTCTTTGTCATGGGATGACTGTCTAAGAATT  
GCAGTGAAGCTGCAGGAGCCCTCTGTTATCTCCATTCCGGCAGCTTCAGTATCAGTCTTC  
CATCGTGATGTCAAGTCTCTAATATACTCTAGATGTGAAGTACACAGCTAAAGTATCA  
GACTTTGGTGCTTCAAGATTGGTTCCAATTGACCAGACTCACGTAGTTACAAATGTACAG  
GGTACATTTGGCTACTTAGATCCAGAGTATTACCATACTGGGCAGCTGAATGAGAAGAGT  
GATGTATATAGTTTTGGTGTGGTACTTGTGGAAGTACTAATCAGAAGAGAACCTATTTTT  
ACAACAGTATCAGGATCAAAGCAGAAGTGTCCAATTACTTCTTTGGGAGCTGAAGGTA  
AAGCCAATCAAAGAGATAGTTGCAGCCTACGTTTCATGAGGAAGCTACTGAGGATGAGATA  
AACAGTGTGCTTCTCTTGCAGAGAAGTGCTTGATGCTCCGAAGTGAAGATAGGCCTACA  
ATGAAGCAAGTTGAAATGACTTTACAGTTCTTGCGAACAAAAAAGTTGAACTCATGCCAT  
GCTACTCCAGAAAACGATGAAGAGCTGCAACAGTTGCTACCGAGAAGGTCTGAAGCTAGT  
TGCGAGCAAGTGGCTGTTAACTTGGGTAACAGTGCTAATTCTGAGTCTCGAAATAGCCTC  
AAATGCTATAGCTTGGAGCAAGAGTTTCATTTCTGTTGGGCTGCCATGCTAA

>OsWAK35a gi |32993704|dbj |AK108495.1| Oryza sativa (japonica cultivar-group)  
cDNA clone: 002-143-G09, full insert sequence  
TAGTAAAATTATTTGGATGTTGTCTAGAAACCGAGGTCCCGCTGTTGGTATATGACTTTATTTCCCAATGG  
GTCATTATTTGGTGTCTGCATTCTGGCTCAAGCAGTGATTTCTCTTTGTCATGGGATGACTGTCTAAGA  
ATTGCAGTGAAGCTGCAGGAGCCCTCTGTTATCTCCATTCCGGCAGCTTCAGTATCAGTCTTCCATCGTG  
ATGTCAAGTCTCTAATATACTCTAGATGTGAAGTACACAGCTAAAGTATCAGACTTTGGTGCTTCAAG  
ATTGGTTCCAATTGACCAGACTCACGTAGTTACAAATGTACAGGGTACATTTGGCTACTTAGATCCAGAG  
TATTACCATACTGGGCAGCTGAATGAGAAGAGTGATGTATATAGTTTTGGTGTGGTACTTGTGGAAGTAC  
TAATCAGAAGAGAACCTATTTTTACAACAGTATCAGGATCAAAGCAGAAGTGTCCAATTACTTCTTTG  
GGAGCTGAAGGTAAAGCCAATCAAAGAGATAGTTGCAGCCTACGTTTCATGAGGAAGCTACTGAAGATGAG  
ATAACAGTGTGCTTCTCTTGCAGAGAAGTGCTTGATGCTCCGAAGTGAAGATAGGCCTACAATGAAGC  
AAGTTGAAATGACTTTACAGTTCTTGCGAACAAAAAAGTTGAACTCATGCCATGCTACTCCAGAAAACGA  
TGAAGAGCTGCAACAGTTGCTACCGAGAAGGTCTGAAGCTAGTTGCGAGCAAGTGGCTGTTAACTTGGGT  
AACAGTGCTAATTCTGAGTCTCGAAATAGCCTCAAATGCTATAGCTTGGAGCAAGAGTTCATTTCTCTG  
TTGGGCTGCCATGCTAAGTCCCTAAGAGCCGTTTTATAATTACTCTGAAATTCACAATGAAAGGATTGAA  
TTTTTCCAATTCTTAACAGGCCCTTAACAGTGGACATCTACTACTCAAGGAATGCGGTCTACCATATTTA  
TTAAATAACATCCCAAGAAAGTATCCTTATCTCATTTTCCCAGAGTATCATTACACTAATGTACCTATA  
CAGTTATAATGATATTGCATTTGATTACTACATGCATGTCTTCTTTTGGGAGAGATGCATATCTATCA  
TATTTGTTACAAAAGTTTTGTCCCAATGGAATAATGATGATGTATGTATCTAGCTGAGAAATGGTTGG  
AAAATACTAGTAATAAAAGTACTATATAAATTCAACGG

>OsWAK35b gi |32978775|dbj |AK068752.1| Oryza sativa (japonica cultivar-group)  
cDNA clone: J013159C14, full insert sequence  
GAGGCTTGGCAACTCGGCGGTGATGGCGGCGGCTCAGCCCTGTTGGGTTGAGAAGTAATACCAATAG  
TTGCCGTGAATCTATTGTGAGTGTGTGAGTGTGAGAAGTGTTCATCCAATTCGAGCTGTTAACATGTTGCT  
GCTGCATGATCAGAGAGAAGGGTACAGAGAGATTGTATAGGAGGAAGAAGGAAAGGAAAAGGCAAAGCAA  
CGTTGAGGAATTTTCATCGTTTTTCGCAAATTAGGGAATTTGTGCAAGGTATCTAATGACATTGATCAGCA  
TGGGATGGGAGTAGCACTCTTGAAGTACGCATTATTATTGCACACTATTGATATTTAGTTTTAGACTATG  
TTTCTGCTTAGCGTAAGTTTTGCGTAGAAGTTGTAATGTCAATTAAGTTCTGGTCCTTATTTTCATGT  
GGAATTTGTGGAGCTAGGATGGGTTGGATTATGTGGTTATATCGTTATTAAGTTATCTTATACTGCCT  
GTCTGGATGCTCGTATTTTGGGGAGACTCTACCGAAATTTCTAATAATTTTGGGAGTTAGTGGTTTT  
TGAGTGTATTTTGGTGTGGCACTCTAGGTAGGTGGCTACCTGGAGTGTACACCGTCGTCCTCGTCGCCG  
CTGTCGTCTCGCCACCGCTGCTCCCGTTGTCGTGCTGTCATTGCACTGCCACCGCTCCCGTCATCGTCG  
CCGCGCAGCCGCTCGTGGTCACCGTCATCCTTGTGTCGTACCATCGTTGCGCCGCGGCTGCTCCCGTCGTC  
ATCGCCGTGCTTGTGCAGCCGATCGTGGTTGCCGTGCTCCTCGTCGTACCATTTGTTTCCATTTATGATG  
GATAAAGATCAAAAAGAATTGATGGATGAAAATTTGATTACTTAGAGATGTGGTTCAAAAACATATTTA  
TTGGTTTTTACGAATATATTATAACAAACATTTAAATTGTTGGAG

>OsWAK35c gi |32980035|dbj |AK070011.1| Oryza sativa (japonica cultivar-group)  
cDNA clone: J023038K11, full insert sequence  
GGTTTCGATTAACAACTTGTTTTTTTTTTTTCTTACACGGACTTACCCATCACCCGTTTCGTCGCCCGG  
AAAATTTCCCTCGTCTCTTCCATGTTCCATCACCAGCGGCTAGCTTTTTCACCTGCAAGATCTCGAGG  
TAGAGTGGTAGACCACAGCCCGCGGATTCTTGCAGAGCAGCTTCCCATCGCCCTGCCTTGATCTGTGCTG  
GCCTGCGTCCCATCCCGTGTGCGCGCGCGATCCCTCCTGGCCTGGGCTGGATTTGTGGATACTTTG  
TACAGGTGTTGAGGGTTGCAGTTGCAGATTTGATTATTTCCAGATCGAGGACGGATGGTTGCGGCCAATG  
CCACCGTCATGGATAGGGTTCTTCTGTGTGGGATCGGCCATTTTGCATCAAGGCTAGAGGATGTTGCAC  
TTGTGCAGTTAAGCTGAAATAGCTTCTTGCAAAAGCATCTTCTTCTAACCCTAAAAGGAAATGGAACACT  
GATGTTTCCCAACGATCGGAGCAGTTTGCCTTCTGCTGAGCTGGAATATATCTACTTTATATGATAAG  
ATGTTTGTAAAGTAAGTTTACTCGAATAGATAAATTCCTAGTTCTTTCACTTAATTAATAATATGTTATTG

TTGATATGACAAAGTTAIGCATATATATCTGAGTACAGATTTTCCAAGCATGAGTGTGCTATACTTAAG  
ATTTGGATTTCACTCCTGTGCAGTGAGTACTTACCAATCATGTTGTACTACATGATTGGTGAAGTACAA  
ATCATATATGTACATCATGTTGTACTACATATGTACAAATAGAAAAAAGATAGTACAAGTTATTTAT  
ATTTTTATGTATAGCATATGTAATAATTTGCACAAGTTTTTGTAGTACATGTTTTAACTTGCTC  
TAAATATATAAATGCTGTGCAGCAGTGTTGTGTACTGGAGGACATTTTCAAATAGGTATAGTACATCCAT  
GTTTAACTGAAACTTTTTCGTTTTAGTTTTAAAGAATAGAAGTTTATTCATGCATATAGTTTTTTTTTCTCA  
CACAGCTGCATATATAGTTTTCCATAGCGGGGTGAATTACCGTTATCACGCTGGCAACCATTGGGTATG  
TATGGGTTTTCCCAATATCCACTATCACATCCACAGAGGTAACCAAGATCAGGTATATATCAAAGTCACA  
GCCAGTAATGTTTAGCAAGCTTACAGAGTAAAAGATCTCCCTGGGGCTTTCCAGGACATGTTATAA  
TCTTTGGTAGCTGGACTTACTGGGATTGCATGGGAAAAATCAACGGTGACATACATAAATAGGAAGACC  
TAGGTGGTTGTGCGGTTGTTGTACAGGTGAGATTGAAGTCTGGGTTCTGAAGCAGCCAGAACCAATGCC  
GAATGGGTAGTCGAAGCTCAGGTTGCCGAGCTCCGTGGGCAGCCTTCAGAGTGGCCGCAGAAGGAAGA  
ATGGTGCTGTTGATACCTTGATTTCTGGCAGCTGGATGATCTCACAGTTGGATTCACTGCAGAAAACA  
AGACGAATAGGAGCAGAGGAACAGCTGAATGAAGGGCTCATGTGCGATCTTTATAGTGTCTTAGCAT  
TGTTCCCTAGAGAAAGTTACAGAGCTTGAGCTGTGAAAATATGTGGGAGAACCGGAGAAGCATTCGAAAT  
GAGTACAATGGGTTTTCATCCATATCTAGGTGATGGTCTTGCTGCTTTATAAGCATCTGGAGTCTGGACA  
GGGCCACAGGGGCCACTGGGAAATGTAAAAGTCAGTGATTGTCAATACTGCAAGAAAATTGTCAAGTTTT  
ACTGCAAGACTACTTACAGCGATGAGGGTTGGTATCAGGTATGTCACTTCAATCAGTTCCACTATTAATT  
TTACATGTGAACCAAAACTTTGCTCTCTCTTTCCACCTGGCTTCCATTTCTTTCAATCACCATCGTTGACT  
GACTGGGCAATATATGGCTCTATATTGGAAGCATCTTCTCACCTTTATTCAACATTAAAGTAGCCAATTG  
CAGCTAGTAATTGATTCTCTGGAGTCTGGTCAGTCAACATTTAGCTTTCTAAGCCATTCAAATGTCCA  
AAGCAAACATCATGAATGTGGCGAGCACATTTTCCACCATGCCGTTGATGCTGACAGCATTGGGAAGTGA  
TGCCAAACCAGCGTAAGTTTCTAACCCATGGAGCGGGGAGTGAACAGTTTTGATCGTGGGAGTCTGGATCT  
GGCTTAGTGTTCAAGTACATGATTTTGACAGGATATAGTGACTGAAGTGTGAAACTGTCTTTCTGGAGA  
TTACCCCTGCATTGCTCATCCAGTGGAGGAACAGAGTTCACTGCTTTGTTACTTGTGAAGTCGATGAAG  
CAGTTGATGGTAGCATTTCACCAAGTGCAGGCAGAGTGACTGACCCAGCGGCTATTGAGCAATCCGTGCT  
AATTAAGTGATTGTAATAAAGCTCTCCATTTCTGGAAAAGAAGTTACGAAAGAAAGGTGCAACTGAAAT  
TGGTTAAGGTTCTTCGAATCCGGTGGAACACCTGCCTACTTCAACCACTGGTTTTAGAACCTATGCTAACG  
AACTACATTCTGCTGATTTGATTATGTTCTAAGCTTTTTCGTCGAGATGGCATCAATTACTTTGCATCCAT  
TCAACGCAAGAGTATGTACAAATATACTGTCTTGATGTCCGTTGCTGTTTTGATGTGCCTAAATTAACCG  
ACTTACTCC

cDNA clone: J023104010, full insert sequence

Page 58

OsWAKs-Supplemental Data 1[1].txt

TATATTATAACAAACATTTAAATTGTTGGGAGAATTGTGTCGTGCCAAAATCTATATAATCTATAATCTA  
TAGTGGCAGAGCCACCTCTAAGACAGGTTGCCACTATCCATAGAAGTCGACATCTATAAAAAAACTAAT  
CGATAATCGAAAACACTATTAGTTGTTGAGGCTTGACGACGCCACTAGCTCCACCACTAATACTCCGTAA  
ATCGAATCGACTATATTCTATGAAATGATTTTTTTTTAAAAAAAATATCTCATTTGGTCAATGGCGTTTT  
ATCACTGTTCTTTTATTTCTTTAAAGAAATTGTTGCGATTAAACAAACTTGTTTTTTTTTTCTTCACACG  
GACTTACCCATCACCCGTTTCGTCCGCCGAAAAATCCCCTCGTCTCTTCCATGTTCCATCACCGCCAGGC  
GCTAGCTTTTACCTGCAAGATCTCGAGGTAGAGTGGTAGACCACAGCCCGCCGATTCTTGCGAGCAGC  
TTCCCATCGCCCTGCCTTGATCTGTGCTGGCCTGCGTCCCATCCCCGTGCTGCCGCGCGCATCCCTCCT  
GGCCTGGGGCTGGATTTGTGGATACTTTGTACAGGGTTGCAGTTGCAGATTTGATTATTTCCAGATCGAG  
GACGGATGGTTGCGGCCAATGCCACCGTCATGGATAGGGTTCCTTCTGTGTGGGATCGGCCATTTTGCAT  
CAAGGTATATATCAAAGTCACAGCCAGTAATGTTTAGCAAGGCATTATCAAGAGTAAAAGATCTCCCTGG  
GGCTTTCCAGGACATGTTATAATCTTTGGTACCTGGACTTACTGGGATTGCATGGGAAAAATCAACGGTG  
ACATACATAAATAGGTAGTTTGAGGTGCTACCGTATACAATAGCATCAATATCTTCGATAACCTCTGTCC  
CACCCTGCAGGAAGAGCCTAGGTGGTTGTGCGGTGTTGTACAGGTGAGATTGAAGTCTGGGTTCTGAA  
GCAGCCAGAACCAATGCCGAATGGGTAGTCGAAGCTCAGGTTGCCGACGCTCCGTGGGCAGCCTTCCAGA  
GTGGCCGCGAGAAGGAAGAATGGTGCTGTTGATACCTTGATTTCTGGCACGCTGGATGATCTCACAGTTG  
GATTCATGTCAGAAAACAAGACGAATAGGAGCAGAGGAACCACTGAAGTGAAGGGGCTCATGTGATCAT  
CTTTATAGTGCTTAGCATTGTTGCCCTAGAGAAGTTTCAGAGCTTGAGCTGTGAAAATATGTGGGAGAAC  
CGGAGAAGCATTGCAATGAGTACAATGGGTTTTATCCATATCTAGGTCATGGTCTTGCTGCTTTATAA  
GCATCTGGAGTCTGGACAGGGCCACAGGGGCCACTGGGAAATGTAAAAGTCAGTGATTGTCAATACTGCA  
AGAAAATTGTCAAGGTTTACTGCAAGACTACTTACAGCGATGAGGGTTGGTATCAGGTATGTCACCTTCAA  
TCAGTTCCTACTATTAATTTTACATGTGAACCAAACTTTGCTCTCTCTTCCACCTGGCTTCCATTCTTT  
CAATCACCATCGTTGACTGACTGGGCAATATATGGCTCTATATTGGAAGCATCTTCTCACCTTTATTCAA  
CATTAAAGTAGCCAATTGCAGCTAGTAATTGATTCTTGAGTCTGGTCAAGTCAACATTCTAGCTTTCTA  
AGCCATTCAAATGTCCAAAGCAAACCTCATGAATGTGGCGAGCACATTTCCACCATGCCGTTGATGCTG  
ACAGCATTTGGAACTGAGTGCCAACACGCTAAGTTTCTAACCCATGGAGCGGGGAGTCGAACAGTTTGA  
TCGTGGGAGTCTGGATCTGGCTTAGTGTTCAAGTACATGATTTTGACAGGTAGAGCAAACACTCGACACA  
TGTTTACATTTGAAGAATTAGTTTAGATTGCTGAAATATGTTGGAGAATATTCTTTTAGCAATTTTACA  
GAGTCATTAATAGAACAATAACCTTAGCAATTTTGCTTGTGTTGTCTATTGCTCGCTATTTCTGAGCCTG  
GATGGAACACTAATGGTGAATATCGATGCAAGGTTTTATCCGTTTACGTCATCTGCAGGATATAGTG  
ACTGAAGTGTGAACTGTCTTTCTGGAGATTACCCCTGCATTGCTCATCCAGTGGAGGAAACAGAGTTC  
ACTGCTTGTGTTACTTGTGAAGTCGATGAAGGCAAGTTGATGGTAGCAGTTACCAAGGTGAGGCAGAGTGAC  
TGACCCAGCGGCTATTGAGCAATCCGTGCTAATTAAAGTGATTGTAATAAAGCTCTCCATTTCTGGAAAA  
GAAGTTACGAAAGAAAGGTGCAACTGAAATTGGTTAAGGTTCTTGAATCCGGTGGAACACCTGCCTACT  
TCAACCACTGGTTTAGAACCTATGCTAACGAACACATTCTGCTGATTTGATTATGTTCTAAGCTTTTCG  
TCGAGATGGCATCAATTACTTTGCATCCATTCAACGCAAGAGTATGTACAAATATACTGTCTTGATGTCC  
GTTGCTGTTTTGATGTGCCTAAATTAACCGACTTACTCCCC

>OsWAK36, 5112.t00008, Chromosome 4, pre-processing

ATGGCTGCCGTCGTCGTTGATGTGCTACTGGCATGTCTAGCGCTGCTCCTACCAGCTTCG  
TCATGTGCAGCTGGGGCACCAACGGTGGCAGCTGCACAGACCAGCGCTGGCGCCGGAGGT  
GGCTATGGCGCTGGCTGTGCCAAGAGCTGCGGTGACCTGACCTTCGATTACCCTTTTCGGC  
ATCGCGCGCGGCTGCGCCGGGGCCATGACTTCCAGCTCGTTTGCAACACCACCACGCAG  
CCCCCAACGCTCTTCTCCAGCATGGCTTTACCCAAGTCATCAACAGCATCGGGGCGGCC  
GGCTATGGTACGTATGTACGTACGTACTATGTTTCTATTGTGTGCCACTGTGCGTAGCTC  
TATGTGGGGGTTGTGGGGTTGGGGGTAAGTGTGGTCTATGTGTGTCAAAAGAAGTT  
TATGATAATCAATTAGAGTGGTGGGAGGAATTATCTGCTCTGCGTTAGTTTCGTGGGGTGG  
TTCAAGAGAAAGCACATCGTTTTCCGCGCGTATGCTTCTGTTTTTTTTAAAAAAAATT  
TCTATAGGAAAGTTACTTTTTAAAAATTATGTTAATCTATTTTTGAAATTTAAATAGTTA  
GTACTCAATTAATCATGTGGTAATGGTTTCATGTAGATAGATGTGTGACACACACAGGCA  
ATATTTTACACAAGTTTTTTTTTTTTTACCTTAGTCTTCCCTAACTAAATTGCGTGTAGG  
CGATCTCCAAACCCCTTCACAATCCCCTCCTAGGGTTGTCTTATCTTGATCCCTACAACC  
GTCTCCGAGAGACCACTGGCATAAAGCTCTTCTATAAGCTTGGTGGCAACCACTAGGAGC  
AACAAGCTGGTCACACTTGCTTAAGAATGTTCAAGTGACACAGTAGCTGGCTCGTTAAGA  
TAATCAGCAACAAACGAGCGGATGGCTCGTTATCCATCCCAATATGCCTTTGGCGTATG  
TAAGCCACAGCCATAAAATAACTTTCAATCAGAATAAATTGGTTTTCTTATCATCATT  
TGTCTTAGTCATCTAACTTGTTTTTTTTTATAATAAGCAGTCTATGTGAACTTTTCACT  
TGACATCCCTATGAGATCTGGTGTGATCTGTACAATGTGTGATGGACGGTACCTGGCGA  
TTCTTTCTCCGTACGTGACAGTGCAAGGGTAACCATCGGACATGGCAACTTTGATGTATA  
CTTGCTCGATGCCTACAGTTGCAAGAGGATAATCTTGTGTTGCTTACCCAGCCTACCAA  
TATTGATGACCCAGTACGAGGGTGAGTGCCAACGGAATATTTCCATCGTCCGTGGTTT  
TCAACTCCAGTTTGTCCATCGGCATGAACACGGCGAAGGCCAGCGAACCAGTGTGACAG

OsWAKs-Supplemental Data 1[1].txt

CGTCAGAATCGAGAACGACGGCGTGC GACTTGGGTGGGCCATTGTGGATCATTGACGCTG  
CGCTGAAGCCAAGCGTGACAAGAGCAGCTATGCCTGTGCCAGCAAGCACAGCCGGTGCGA  
TGATAACTTGGAGCTTTACAGCTTCCCGTGCTGGTTACTTATGCAAGTGCACCGATGGGTA  
TCAAGGGAACCCGATGCACCCAATGGCTGCCGGCGTGATGTAGGTATATGCATGCTTAT  
AATTTTTTACACCTCTATCTATATCTATGTCTCTCAAAAATCTTCTAAGGAAAATAATGT  
TTCTATTGATTTATGAAAAATATATATATTCTGTATATGTCTGTAGAGTAATTTTATAGT  
CCTTGAGAGATAAAAAAAGTACTAATTTTTTAGTATAAATTTGTTGTCTTCTAGTACAA  
AAGGCATCGAGAGTTATTAATTTTTACGTTGGGAAATACGGTAACCTCTCGCGGTAACCTT  
TCGAGAACAGTAAAAATCCCTCATATCTATAATACCAACATTTTGTAAAAAGTATTTTGAAA  
TTGAAATATGTTGGTATAAACATGAATTTATACACTAAATGTTTTTGTAAATTTGACTGCC  
TGTTGGTCAAGATTTATAAAATCTGACCTTTGAAATCAAAGTACGTAGGTCTTACGAAA  
ATATACGGTGGGAACGATAAATTAACATATATATGTTAATGTTCAAAGCATCAATAGTAT  
ATGTACAGTACGTAATTAGCATCAATTTTAAATTATTGCTGTTGACATATCATGGTTTTCT  
TCAATGCAGGATTGCCGACGCAAGATATGATCGGTTTCCGAGTAAGAACAATTGTAGCC  
CGTCATGTGGAAATATCAGCGTTCCATATCCATTTGGCCTAGAAAAAGGCTGCTCTGCAA  
ATCAGCATTTCTGCTCAGATGCACCTACTACAAAGACAACAAGAGTACAAACCCTGACC  
TCTTGTGGTGGGCAACAAGATACACCGACGAGCCGTCAACACCGACCAAGCTTGTTGCGA  
TAGATATCAGCGAAGGGCTCATTATCTTGGCCGGTGAGCACTACGAGGAGTTCTTGCCA  
TGGATGGTACGGCTAGTGCTAGAGTCTCCGATGGTTCAGCAAAGGACTTTGTGGTTAAGA  
ATCTGCATTTTGGCATCACAAACCAACCTGCAAAGAGGCGCAGCAGAATACCACCGGAT  
ATGCATGTGTACGCGTTAACAGTACGTGTTTGGCCGTCAACACAGGTGATGGGTATATTG  
GTTATAGGTGCAAGTGAAGCATGGCTTTGAAGGGAATCCGTCTATCAAAGATGGTTGCC  
AAGGTTTTGTCTCTGTCCCTTTTCAAGCACAGTTAGCATTGCTTCACAATTTAACGCAC  
TTGGACACAGCCAACATATATATTGGTACTCTCTCCGTGCGATAAAAAATTACATTTCTAG  
CTAATTTAGGACAAATCAGTAGGATTAGAAAATAACCACGATGACCTTATTTAATGAATC  
CATTGCATGCACACATTGATATATACAAATGATTAAGGAAGTTTAAGATAATTAACC  
CATATAATTAGCATAATTAATTAACAAGTTAAGAGAACCTTAAGGAAACTTATCTAGATGA  
ATCAATTTGTTGGACCCACATGTCTAGAAATACAATTTTTATGGAACAAAACCTTACAG  
CTAGAAATACAATTTTTTTGGGACGGAGGTAGTATATTGTTATACTCTCCCCTTATTACA  
AATATATTTTCTCTCTTGTCTTAGACTGCTAAAATCCCTCACGTCTTAATTACTGCAACA  
TGTACGTGGTTGCCGATGTTGACGAATGCTCCACTGCACCAGGCATCTGTCCAGAAATAT  
GCAATAATACTGTCCGTAACACTACCTTGCATCAAGTGCCTGCTAAATCAGAGTACAATG  
ACAAAACAAAGCGGTGCACTTCAGTGAAAAAGCAAAAAAATCTTCTTTTGGTGAGTTAT  
GTACTCCATTCAATTTACCATGCAGAAAAAGAAAATTAAGGAAAGTAAATAATGTAC  
TAGCAAAGCATGCATAACCATCGGCTGCCTCATTATTTAGGTATCGTCATTGGACTTAGT  
GCTGGCTTTGGAATTTCTACTGCCTGGCTTAAGCGCAAAAAATGCTCTTCCATAAATGGAAG  
AAAGGTATCCAGAAGCGGCTACGTAGGAAGAATTTTCTGAAGAACGAAGGACTTCTCCTA  
GAACAATAATATCGTGTGATGAAACCACTACTGATAGAATGAGTATCTTCACTTTAGAA  
GAGCTAGAAAAACAACCTTTGATCACACAAGAATACTTGGCCAAGGAGGACACGGTACAGT  
TTACAAAGGCATCTTATCAGACCAACGTGTCTGGCCATTAAAAAGTCTATGACGATCAA  
ACAAGGTGAGATCACTCACTTCATAAATGAAGTCGCTATTCTTTTACGGATCAACCATCG  
GAATATCGTTAAACTTTTTGGGTGTTGCTTGAAACTGAGGTCCCCTATTGGTGTATGA  
TTTTATTTCCAACGGATCATTATTTGAACCTTTCGTTACAATTCGAGTAATGGTAGCTT  
GCTGTCTTGGGAAGACACCTTAAGGATTGCTACAGAAGTTGCTGGAGCCCTCTATTATCT  
CCACTCTGCACTTTCAGTATCAGTTTTTCATCGTGATGTGAAGTCTCTAATATACTGTT  
AGATGCAAAATTACACTACCAAAGTTTCAGATTTTGGTACGTCAAGATTGGTTTCTATCGA  
TCAAACCCATATTGTCACAAAGGTGCAAGGCCATTTGGTTATTTAGATCCAGAGTATTG  
TCAAACCTGAGTGTCTAAACGAAAAAAGCGATGTGTATAGTTTGGTGTGGTACTATTGGA  
GCTACTTCTCATGAAAGAGCCGATTTTTACAAGTGAGAATGGCTTAAAGTTGAATTTGGC  
CGTTATTTTTCTTGAGGAGGTGAAGGTAAGGCCATTAAGTGAGATTGTTACCCTAAGAT  
ATACGAAGAAGCAACAGAGGAAGAGATTAACAATGTTACCTTGCTTGCGGAGATGTGCTT  
GAGTCCCCGAGGCGAAGAAAGACCTACCATGAAGCAAGTAGAGATGACATTACAGTCCTT  
GCGCAATGTTACACAGACAACGGCTGTTACCGTGCTAATGCATCGGATCAGCTGAGCCA  
AAGATGCTATAGCCTAGAGCATGAGTTCATTGCTTCAGCTGAGCTACCACGCTAA

>OsWAK36, 5112. t00008, Chromosome 4, post-processing  
ATGGCTGCCGTCGTCGTTGATGTGCTACTGGCATGTCTAGCGCTGCTCCTACCAGCTTCG  
TCATGTGCAGCTGGGGACCAACGGTGGCAGCTGCACAGACCAGCGCTGGCGCCGGAGGT  
GGCTATGGCGCTGGCTGTGCCAAGAGCTGCGGTGACCTGACCTTCGATTACCCTTTTCGGC  
ATCGGCGCCGGCTGCGCCCGGGGCCATGACTTCCAGCTCGTTTGCAACACCACCACGCAG  
CCCCAATCGCTCTTCTCAGCGATGGCTTTACCCAAGTCATCAACAGCATCGGGGCCGCC  
GGCTATGCTATGTGTAACCTTTTCACTTGACATCCCTATGAGATCTGGTGTGATCTGTAC  
AATGTGTCATGGACGGTACCTGGCGATTCTTCTCCGTACGTGACAGTGCAAGGGTAACC

OsWAKs-Supplemental Data 1[1].txt

ATCGGACATGGCAACTTTGATGTATACTTGCTCGATGCCTACAGTTCGAAGAGGATAATC  
TTGTGTTTCGCTTACCCAGCCTACCAATATTGATGACACCAAGTGACGAGGGTGAGTGCCAA  
CGGAATATTTCCCATCGTCCGTGGTTTTCAACTCCAGTTTGTCCATCGGCATGAACACGGC  
GAAGGCCAGCGAACCAAGTGTGACAGCGTCAGAATCGAGAACGACGGCGTGCGACTTGGG  
TGGGCCATTGTGGATCATTGACGTGCGCTGAAGCCAAGCGTGACAAGAGCAGCTATGCC  
TGTGCCAGCAAGCACAGCCGGTGCGATGATAACTTGAGCTTTACAGCTTCCCGTGCTGGT  
TACTTATGCAAGTGCACCGATGGGTATCAAGGGAACCCGTATGCACCCAATGGCTGCCGG  
CGTGATGTAGGATTGCCGGACGCAAGATATGATCGGTTTCCGAGTAAGAACAATTGTAGC  
CCGTCATGTGGAAATATCAGCGTTCCATATCCATTTGGCCTAGAAAAAGGCTGCTCTGCA  
AATCAGCATTTCCTGCTCAGATGCACCTACTACAAAGACAACAAGAGTACAAACCCTGAC  
CTCTTGTGGTGGGCAACAAGATACACCGACGAGCCGTCAACACCGACCAAGCTTGTTGCG  
ATAGATATCAGCGAAGGGCTCATTATCTTGGCCGGTGAGCACTACGAGGAGTTCCTTGCC  
ATGGATGGTACGGCTAGTGCTAGAGTCTCCGATGGTTCAGCAAAGGACTTTGTGGTTAAG  
AATCTGCATTTTGCATCACAAACCAACCTGCAAAGAGGCGCAGCAGAATACCACCGGA  
TATGCATGTGTCAGCGTTAACAGTACGTGTTTGGCCGTCAACACAGGTGATGGGTATATT  
GGTTATAGGTGCAAGTGAAGCATGGCTTTGAAGGGAATCCGTCTATCAAAGATGGTTGC  
CAAGGTATCGTCATTGGACTTAGTGCTGGCTTTGGAATTCTACTGCCTGGCTTAAGCGCA  
AAAATGCTCTTCCATAAATGGAAGAAAGCTTCAGTATCAGTTTTTCATCGTGATGTGAAG  
TCCTCTAATATACTGTTAGATGCAAATTACACTACCAAAGTTTCAGATTTTGGTACGTCA  
AGATTGGTTCTATCGATCAAACCCATATTGTACAAAGGTGCAAGGCCCATTTGGTTAT  
TTAGATCCAGAGTATTGTCAAACCTGAGTGTCTAAACGAAAAAAGCGATGTGTATAGTTTT  
GGTGTGGTACTATTGGAGCTACTTCTCATGAAAGAGCCGATTTTTACAAGTGAGAATGGC  
TTAAAGTTGAATTTGGCCGGTTATTTTCTTGAGGAGGTGAAGGTAAGGCCATTAAGTGAG  
ATTGTTACCACTAAGATATACGAAGAAGCAACAGAGGAAGAGATTAACAATGTTACCTTG  
CTTGCGGAGATGTGCTTGAGTCCCCGAGGCGAAGAAAGACCTACCATGAAGCAAGTAGAG  
ATGACATTACAGTCTTGCGCAATGTTACACAGACAACGGCTGTTACCGTGCTAATGCA  
TCGGATCAGCTGAGCCAAAGATGCTATAGCCTAGAGCATGAGTTCATTGCTTCAGCTGAG  
CTACCACGCTAA

>OsWAK37 9632.t02778, Chromosome 4, pre-processing  
TTTCTCATTTTCGCACAACAGAATACCAGCAAAGAATCCAAGATTATCCAGGCATCGCTCA  
TGAAACCATTCATCCACAGAGCAGCTGCTTTGCTATGTCTCGCCGTAGCAACTGCGGTGT  
GTCTCTCCTCCGTACAGCGATGTCTGCCAGAGAAAAATGCGGTGACATCGAAGTTCCTT  
TTCCATTTCGGCATAGACGGTGATCAGCCTGGCTGTGCCAAGCCGGGCTTTGAGCTGAGCT  
GCGGCAACAACACGGAGAGTGGTGTACCGATTCTCCTCCGCAAAGTGCAGCCCCTTAGCA  
GGAGCGTGGAGGTGCTCGGCATCTCCTTGCCGAAAGGCCAGCTCCGGATGAGGATGCATA  
TGTCCTCTCACTGCTACAACATGACCACTCGTGTCATGGACTGCGTCGACAACGGGTGGA  
TGGACTTAGCGGGAGTCCCTTACCTTCTCCGACAGCGCAACAAGTTCACGGCCTTTG  
GGTGCCATAGTCTTGATATCTTGCGGCGGGCGAACAGAGGGACATAGGAAGCAACCTAA  
GAATTGGCTGCGCGGCCAGTTGTGGCAAGGATGATTCTGCCACTATCGGTGGTGGTAGAT  
GCTCTGGGATAGGCTGCTGCCAGACGGCTATCCCAAAGGGGATAAAGTATTATAAGGCAT  
GGTTTGATGACCGCTTCAACACGTCTTCCATGTACACATGGAACCGTTGTGCCTATGCAG  
CGCTCGTGGAGGAGTCCAGCTTCAATTTCTCCATGATTTACGATTCATCATCGAAGTTCA  
ACAGCGATACCGTCTCTAGTCAGCCGCGTTTGTGGTTGACTGGGTTATGGGAATATAT  
CATGCAAAGAAGCTCGTAAAAATCTAGGTACCTACCCATGCATCAGCAACAACAGCATT  
GTTTGGACTCACAGAATGGACCGGTTACATTTGCAACTGCAGAAAGGGGTTCCAGGGTA  
ACCCTTACAATAAAGGTCTTGACAGCTGCCAAGGTGATTATTTACAACCAAACTTTTGT  
TCCCAGAATACATACATAGTGCTTTTACTTCTTACAAATTTGTGCTAGCTAGTATAGTAC  
GTGGTACATTTAGCAATGAAGTATACGTGTCTGCATATCGGTTTATTTAATTTGAGCTTA  
GTGCAAAATTTATACGTACCTTGTACATGGATAGGGACAGATCCAGTAATAGAGGGGA  
CTAAACATACTTGGGATAGTAGAAAAAGTACACCAGGCTCTCGTGGTCCGAAGGGAGGACT  
TGGGGACAGGGGCGGTGGGTTTGGGCCACGCGCACTGCCTCCACATTTGATTCGGCCCT  
GACCAGGGATACCAAATACTCCCTCCGTTACAAAATGTTGGCACCGTTGACTTTTTAGCA  
CATGTTTGACCGTTTCGTCTTATTTCAAAAAAATTTGTGAAATTGTAAAGCTATATGTGTA  
CATGAAAGTATATTTAATAATGAATCAAATGATATGAAAAGAATAAATAATTGCTTTAAT  
TTTTTTGAATAAGACGAATGGTCAAGCATGTACTAAAAAGTCAACGGTGTCAAACATTTT  
GAAACGGAGGGAGTACTAACTCTAGATCGCAATCGAGAATGAAATATCTTCATTCTTGGA  
AGTGTAAGACTAATCAGAAAATAATTGACTTTACTTAGTCATCTGCAAAAGGTTGGATG  
CACAACCTTGATAAAAAGGGATCAACTTGGAGAGTCCATGTGATGGGCAACTTGGTAACCT  
AGTAACCTGTTCCACTCCATTTTTGTTAACATGATAATGAGTTCGTCTATCAAGCAATAG  
AATTTTATCTGGTTAAGAGGTATGTATATATATTCACCCAATAATTTTACTAGTTGGAT  
TGGCAAAGAAAAAGCTAATGTGGGTGGGTTGGCATATTCCAACCTTATCTTTAGTGATGAT  
TATAAGCCGTTATAGCATATTAGAGACCAATAATTTGTTGGTAAAAAAATTATATATGTG

OsWAKs-Supplemental Data 1[1].txt

TCCATAGCAACTTAAAGCTAATATAACAAAGAACTATACATTGAGAACTATTCAAAA  
TCAACTCCAAAAATTTATATATGTGTCCTTGGCAATGGTTGATACGTTGTTGTGTAATG  
ATGAGGCCTCATGTGCCAGTTATAACCACCTGCACGCTTTGTGTTTGTAGTTCATCAA  
CTATAGCTTACAACGGCTAATATTTGACATGAACCAAGTTTCTGTGGGTAAATTGCAA  
TTGTCAACCCTAAATCCTAATTGACTGGGATGAACCAAAATTAAGAATATGCAATCCAATGC  
ATTGCCATTTAGTGCATCATGATGTTTTTTCTTAAGAATTGACATTATATATTGACATA  
AATTTGTAATCTGGATGTAGATATTAATGAGTGTGACGATCCTAAGAAGTACCCCTGCTA  
TGGTAAATGCATTAACAACTTGGAGGATTTGATTGTTTCTGCCCTGCGGAATGAGAGG  
AAATGCATCTGTTGGACCATGCCGAAAGATTTCCCACTGGGAATTGGTAAATATTCAAAA  
TCTACTACATAATTCTTGATAAATTAGATGTACTTTAATGTTCAAATAAAAAAGTATTTG  
GCATCCTTAAATTTCTTTAAGGACAAAGTCCAAATATCCCCCTAATATTTGGATCGAAGT  
CCATCTATGACCCTAAACATAAAAAACCGGACATTCAACCCTTTGAACCTTTGCCATACTAT  
CCAAATTTGTTCCCTAAGGTGTTTTTGGACGGTGTTTTTTAATATATTTTGAAAGCTTA  
AACAAACAAGTAACAACCTTTGAATACTAATCTGACATATTTGCATATCATCAGTTCTAA  
GTCAACAATTTATCCATATATAGTGATGTCATACTATTATTACGTTGGTACTTGTTTATA  
AGTGAGAGCTAACAAAGAGTAAAAATAAGATTTAAATTGAATTTTTATATATATGTCC  
AATGTTTTATTTTATGTGACAACTCATCCAATTATATACAAACTGATAAAAACCACTA  
TGCAAAACTGCCTTAGGGTGCTATATAAATGGTATTGTAAAGTTTAAAGTGGTTCAATGCC  
TGGTTTTACAGTTCAGAGTACTAGAGGAACCTCCATCTAAAATTTAGGGGGTATTTGGA  
CTTTCTCTTTCTTTAAAAGGTTCTTAAAAATGTTTGCTTGTGTAGAAAGTGCATAGAA  
TCTAATATTATAGAAGAACACATAAAATCAGATTTGTTCTCTAATCCAGCAAACTGGAAGA  
TAATCTATAGTGGCTGTTCTGTAGTTCATCAGTTTGACATGTGAAAGAGGAATCAACTA  
ATGTTACAGCTATTATTTGATTCAACTTATCCTTGATACTTTAGCTTACCATTGGATGTT  
CATTGAGGCAATAGACAAAACCTAATATTGGTCTATATTTGTAGGTATTGCAATTGGTTTG  
GGTGTGGTTTTCGGAATTTCTCTACTTAGCTTGTCTGTGGTGTTCCTATCCGTAAACAG  
AGAAGCGACATCCAAAGGCAACTACGGAAGAAATATTTTACAGAAAACAAAGGCCTTCTA  
CTAGAACAACCTAATATCTTCTGACGAAAGAGCTAGCGATCGACAAAAATTTTCTCCCTAG  
AAGAGCTTAAAGAGGCAACTAATAACTTTGACCCAACACGTGTTCTCGGTAGTGGAGGTC  
ATGGTATGGTTTACAAAGGTATCTTATCTGATCAACGTGTGGTGGCGATAAAAAAACCA  
ACATCATCAGGGAAGAGGAGATTAGCCAGTTTATCAATGAGGTTGTAATTTCTCTACAAA  
TAAATCATCGCCATATTGTCAAACCTTTGGATGCTGTCTTGAAACTGAAGTCCCTCTAT  
TAGTGTATGATTTGTACCTAATGTTTCACTAAATCAAATTATTCATGCTGATAAAAGTA  
ACAGACGTTTCTCATTGTCCTGGGATGATTGTTTGCGAATTGCTACAGAAGCAGCAGGTG  
CTTTATATTACCTCCACTCTGCAGCATCGGTATCAGTTCTACATCGTGATGTGAAATCAT  
CTAATATACTCTTGGATTCAAACCTACACCGCTAAAGTTTTCAGATTTTGGAGCTTCAAGAT  
TGATTCCGAATGACCAAACCCATGTTTTACAAATATACAAGGGACATTTGGATATTTAG  
ATCCTGAGTACTACCATACTGGGCATCTCAATGAGAAAAGTGATGTGTATAGTTTTGGTG  
TAGTTCTTTTAGAGCTGCTTCTAAGAAAGCAACCTATTTTTGACGATGGCACTGGCACA  
AGAAAAATCTATCAATATATTTTCTTCTGAGATAAAAGGAAAGCCTATTACAGAGATAG  
TTGCCCTGAAGTTATTAAGGAAGCAATAGAGGATGAGATTAATATTTTTGCCTCAATTG  
CACAGGCATGCTTGAGGCTCCGAGGTGAAGAAAGGCCAACAAATGAAGCAAGTGGAGATAT  
CATTACAGTCTATAAGAAACAAAGTTTTGAGTTGAGGCAGCGCTAGTTCCGAAAGCAACC  
ATGAGATAGAAACACCTTATGTGAAAGTTACGTTGATCTGCATCAAACCTATGGGTGTTG  
ATATCAATGGCATTGCTAATTTAATATCTTCAAATTGCTATAGCTTAGAGCATGAATTTA  
TGTTATCCGCTAGCTTTGGAAGGTAAATTTGTGTTTGTCCCGTTGTTGAAATGTCGATAGA  
TGTTCTTATAGTATCTTTGTGCATTTGCACAATCTATAAGCTTGTCTATAACAAAATGTT  
GAATATACATTTGTGATACATCATTA AAAA

>OsWAK37 gi | 37988243 | dbj | AK111580.1 | *Oryza sativa* (japonica cultivar-group)

cDNA clone: J013083I23, full insert sequence

GCTTTCTCATTTTCGCACAACAGAATACCAGCAAAGAATCCAAGATTATCCAGGCATCGCTCATGAAACCA  
TTCATCCACAGAGCAGCTGCTTTGCTATGTCTCGCCGTAGCAACTGCGGTGTGTCTCTCCTCCGTACAG  
CGATGTCTGCCAGAGAAAATGCGGTGACATCGAAGTTCTTTTCCATTGCGCATAGACGGTGATCAGCC  
TGGCTGTGCCAAGCCGGGCTTTGAGCTGAGCTGCGGCAACAACACGGAGAGTGGTGTACCGATTCTCCTC  
CGCAAAAGTCAGCCCTTAGCAGGAGCGTGGAGGTGCTCGGCATCTCCTTGCCGAAAGGCCAGCTCCGGA  
TGAGGATGCATATGTCCTCTCACTGCTACAACATGCACACTCGTGTGATGGACTGCGTCGACAACGGGTG  
GATGGACTTGACGGGGAGTCCCTTACCTTCTCCGACAGCGCAACAAGTTACCGGCCTTTGGGTGCCAA  
GTTCTTGCATATCTTGGGGCGGGCGAACAGAGGGACATAGGAAGCAACCTAAGAATTGGCTGCGCGGCCA  
GTTGTGGCAAGGATGATTCTGCCACTATCGGTGGTGGTAGATGCTCTGGGATAGGCTGCTGCCAGACGGC  
TATCCCAAAGGGGATAAAGTATTATAAGGCATGGTTTGTGACCGCTTCAACACGTCTTCCATGTACACA  
TGAAGAGTTTGGCTATGCAGCGCTCGTGGAGGAGTCAGCTTCAATTTCTCCATGATTTACGATTTCAT  
CATCGAAGTTCAACAGCAGCATACCGTCTCTAGTCAGCCGCGTTTGTGGTTGACTGGGTTATGGGAAATAT  
ATCATGCAAAGAAGCTCGTAAAAATCTAGGTACCTACCCATGCATCAGCAACAACAGCATTTGTTTGGAC

OsWAKs-Supplemental Data 1[1].txt

TCACAGAATGGACCGGGTTACATTTGCAACTGCAGAAAGGGGTTCCAGGGTAACCCCTTACAATAAAGGTC  
TTGACAGCTGCCAAGATATTAATGAGTGTGACGATCCTAAGAAGTACCCCTGCTATGGTAAATGCATTAA  
CAAACCTTGGAGGATTTGATTGTTTCTGCCCTGCGGAATGAGAGGAAATGCATCTGTTGGACCATGCCGG  
AAAGATTTCCCACTGGGAATTGGTATTGCAATTGGTTGGGTGTTGGTTTCGGAATTCTCCTACTTAGCT  
TGTCTGTGGTGTTCCTTATCCGTAACAGAGAAGCGACATCCAAAGGCAACTACGGAATAAATATTTTCA  
GAAAAACAAAGGCCTTCTACTAGAACAATAATATCTTCTGACGAAAGAGCTAGCGATAGCACAAAAATT  
TTCTCCCTAGAAGAGCTTAAAGAGGCAACTAATAACTTTGACCCAACACGTGTTCTCGGTAGTGGAGGTC  
ATGGTATGGTTTACAAAGGTATCTTATCTGATCAACGTGTGGTGGCGATAAAAAAACCAACATCATCAG  
GGAAGAGGAGATTAGCCAGTTTATCAATGAGGTTGTAATTTCTCTCACAATAAATCATCGCCATATTGTC  
AAACTCTTTGGATGCTGTCTTGAACTGAAGTCCCTCTATTAGTGTATGATTTTGTACCTAATGGTTCAC  
TAAATCAAATTATTCATGCTGATAAAAGTAACAGACGTTTCTATTGTCTGGGATGATTGTTTGCGAAT  
TGCTACAGAAGCAGCAGGTGCTTATATTACCTCCACTCTGCAGCATCGGTATCAGTTCTACATCGTGAT  
GTGAAATCATCTAATATACTCTTGGATTCAAACCTACACCGCTAAAGTTTTCAGATTTTGGAGCTTCAAGAT  
TGATTCCGAATGACCAAAACCATGTTTTACAAAATATACAAGGGACATTTGGATATTTAGATCCTGAGTA  
CTACCATACTGGGCATCTCAATGAGAAAAAGTGATGTGTATAGTTTTGGTGTAGTTCTTTTAGAGCTGCTT  
CTAAGAAGGCAACCTATTTTTGACGATGGCACTGGCACAAGAAAAATCTATCAATATATTTTCTTTCTG  
AGATAAAAGGAAAGCCTATTACAGAGATAGTTGCCCTGAAGTTATTAAGGAAGCAATAGAGGATGAGAT  
TAATATTTTTGCCTCAATTGCACAGGCATGCTTGAGGCTCCGAGGTGAAGAAAGGCCAACAATGAAGCAA  
GTGGAGATATCATTACAGTCTATAAGAAACAAAGTTTTGAGTTTCAGGCAGCGCTAGTTCCGAAAGCAACC  
ATGAGATAGAAACACCCTTATGTGAAAGTTACGTTGATCTGCATCAAACCTATGGGTGTTGATATCAATGG  
CATTGCTAATTTAATATCTTC

>OsWAK38 9632. t02788, Chromosome 4, pre-processing  
ATTTTTTCCAGCAACAAAGATGATTCAGGCATTGATCTTCCCTACTCTACTATGTCTCAC  
CATAGCAACTTCAGGTGGTCTTGCTGTAGTTGCAGCATCCACCTGCCAGAGAAGTTGTGG  
TAGCATAGATATCCCTTTTCCATTCCGCATCAAAGGTGAGGCTGGCTGCGCCATGCCTGG  
TTTTGAGCTGATCTGCAACAGTACCGGTAACAGCATACCCAAGCTGCTTCTCCGGAATGT  
GGAGCTGCTCAACATCTCGTTGCCAGAAGGTTAGGCTCGCATGAGGATGCCTATGTCATA  
CGAATGCTACAACATGACGAAACATGACATGGACTGCGTCGACAAGGCAATCTGAGCTT  
GACGGGAAGTCCTTTACATTCTCTAACAGTGCCAACAAGTTTCACGGTCTTTGGATGTCTG  
AATGCTTGGTTACCTCGGTCTGGTGGGCAGAGCGCGTAGGCAGTAACCTAACAATTGG  
CTGTGCCACAGTTGTGGCCAGGGTGATGATCTTTTAAGCATCAATGGTGAAGGATGCTC  
TGGGATAGGCTGCTGTGACAGCGGCATCCCCAAAGGGATCAAGCACTACAAGGTTTGGTT  
TGACACACACTTCAACACATCAGTCATCCACAATTGGTCCCCTGTCAGTTATGGAGCGTT  
AGTGGAGGAGGCCAGCTTCAAATTCTCCACGATTTATGCCACGTATCGAATTTTCAGCAA  
CCCTTTCCGGTGGTGAGCCTCCATTTGTGGTGGACTGGGTTGTAGCAAAACAATACCTGCGC  
CGAAGCAAGAAAAACATTTAGATTCATATGCATGTGCTAGCAGCAACAGCGTGTGTATTGA  
CTCGAGCAATGGACAGGATCTTCTGCAATGTTCTCAAGGATTTGAGGGGAATCCTTA  
CCTTCAGGGTCAATGATGGTTGCCAAGGTGAATATTTCACTACGCCTATGATTTACAGATA  
TTGCGTTTACTAATACCAACCCGTGCGTTGCATGAGTTATGTTTACTAATCATTAAATAC  
TATAAATTTAACCATTCGGTGATATCTTCGTTAATAATTTTCAAATACAGCGACTTAG  
GTCAAAAAAAGAGTTAATGTAATCCTAAAAGAAGTAGAGTTAATGTAACCTTGCTTTTTT  
TTTGACTAAATAGCTAATTCGAAATGGCGTCTTTCCAATTTTACCATGGTTTAAATACTT  
CCAGTTATGGTATGCATCTTCTGGCGCAAGAATGAATTTATCATAGCTGCCATGCT  
AAGATTAATTGCTCAGTTTAAATGGATCTTCAACATGACATGTAAGCAAAATCAAATCGC  
AGACAGCACTGTAAGTGTGGTTTTGTTTTAGAACTGGCACTAGTGACCATCTCTCATCG  
GTGTTCTTTCTTGGTGTGCGTTCTAGAACCAGCACATATCATGGAGACACAAAATTTTGA  
ATGTGTTATTAATAATTAATGCATGTAACTTTGGTGTAGCAACTCACCCATGTTTTG  
ATCCATGTCTGTAACATTCTGGGTGGCTAAACCTCAAACCTGACTCTTTAGCCATAATCG  
AAACAAAGCTTGTAAATAGTGTATATACAACTTTTTTTTAGCTTACTGCATGCCATCAA  
GCAATATTTGTTTTCTTGGGAGTAACATCATAAATTTTGCATCAATGTGAAATATGATT  
GTAGATATTAACGAGTGTGAGGATTCTAATAAGTACCCTTGCTATGGGAAGTGCATCAAC  
AACTTGGAGGATTGATTGTTTTTGCCTGCGGTACTCGAGGAGATGCTTCTGTTGGA  
CCATGCCGAAAAGAGTTTCCACTAGCATTCGGTAAACACATATCCTCAGAATACTGCAAG  
ATTTTTATAGCCAATATTTGCTTTAAAGTTCACATGAAATGCATTTGGGCCCTTAAAA  
TCATTTAAAAAGGAAGTACACAAATGATTTTGCATTCTACAAATATTTCAAATAAATA  
AAATAACTTGGGTTTTGTAATGCCGGTCTCTTTCACAGCATTAACAAGTAGACAAAATA  
ATATTCATGAATATTAATACTTATAGATGTATGGTTTCATTTAAATTACCTCATGAA  
ACTTTTACTTGTGCTTACATCTAATTGAAAAATAAATAAATAAATCATGTGTATATGTTT  
TTCTAGGTATTGCAATTGGCCTAGGAGTTGGTTTCGGAATTCTTCTTCTTGTCTTAACCG  
TAGCATTCCTTGTCCGTAAGAAAGAAATGATATCCAAAAGCAATTAAGGAAGAAATATT  
TTCGAAAAAATCAAGGCCTTCTTCTAGAGCAACTTATATCATCTGATGAATGCGCTACTG  
ATAGCACAAAAATTTTACCCTAGAAGAGCTGAAAGAGGCAACAAATAACTTTGATCCAG

OsWAKs-Supplemental Data 1[1].txt

CACGTGTTCTTGGTAGTGGAGGGCATGGTATGGTTTACAAGGGCATATTGTCCGACCAGC  
GTGTGGTAGCTATAAAAAACCAACATCATTAGGGAAGAAGAGATTAGTCAGTTCATCA  
ACGAAGTTGCAATACTATCGCAGATAAATCATCGGAACATTGTAAAACATTTGGATGTT  
GTCTTGAAACCGAAGTCCCTCTACTGGTGTATGACTTTGTCCCAAATGGCTCACTAAATT  
GCATTATTCACGCTGATCCAAGTATGAGAGAATTCACATTGTCTGGGATCAGTGCTTGA  
GAATTGCCACCGAAGCTGCGGGAGCTTTATATTACCTCCACTCTGCAGCATCAGTATCTG  
TTTTACATCGTGACGTGAAATCTTCGAATATACTTTTGGATGCCAACTACACCGCTAAGG  
TATCAGATTTTGGGGTATCAAGACTGATTCTAATGATCAAACCCATGTTTTTACAAATA  
TCCAAGGCACATTTGGGTACTTAGATCCTGAGTACTACCATACCGGGCATCTAAATGAGA  
AGAGTGATGTCTACAGTTTTGGTGTGTTCTTTAGAGCTGCTTCTCAGGAAGCAACCTA  
TTTTTGACAGTGAATCTGGTTCAAAGAAAAATTTATCTATTTACTTCCTTTCTGAGCTAA  
AAGGAAGGCCAGTTGCAGAGATAGCTGCTCCTGAAGTTCTTGAAGAAGCAACTGAGGATG  
AAATTAACATTGTGCGCTCAATTGCCCGGGCATGCTTGAGGCTTAGAGGTGAAGAACGGC  
CAACTATGAAGCAAGTAGAGATGTCAATACAATCTATAAGAAATAAAGGTTTCAGATCAG  
GCACAGTTTCTCCAGAAGATAGCGATGAGCTGCAAACCTCCACAATCAGAAGGACATGTAG  
ATTATCATCAAGCTACGGGGATTGGAATCAACAGTATGGCTAATTTAGCATCTCCAGGTT  
GCTATAGCCTGCAGGAAGAATTTATGTTATCCGGAAGTCTTCCACGGTAACTATGATTG  
TCATGCTGTTAAATTGTTGCATGATGATTTTTCTACCTTCAACATAGCTTGTCAATTTCC  
CCATCTATCTTATTGTAAAGAAAATACTTGTGTACATATTGTGTTACATCATTAACAGTC  
TGGTACACCTTCTGCTC

>OsWAK38 9632. t02788, Chromosome 4, post-processing  
ATTTTTTCCAGCAACAAAGATGATTCAGGCATTGATCTTCCCTACTCTACTATGTCTCAC  
CATAGCAACTTCAGGTGGTCTTGCTGTAGTTGCAGCATCCACCTGCCAGAGAAGTTGTGG  
TAGCATAGATATCCCTTTTCCATTGGGCATCAAAGGTCAGGCTGGCTGCGCCATGCCTGG  
TTTTGAGCTGATCTGCAACAGTACCGGTAACAGCATACCCAAGCTGCTTCTCCGGAATGT  
GGAGCTGCTCAACATCTCGTTGCCAGAAGGTTAGGCTCGCATGAGGATGCCTATGTCATA  
CGAATGCTACAACATGACGAAACATGACATGGACTGCGTCGACAAGGCAAATCTGAGCTT  
GACGGGAAGTCCTTTTACATTCTCTAACAGTGCCAACAAGTTCACGGTCTTTGGATGTCTG  
AATGCTTGGTTACCTCGGTCTGGTGGGCAGAGCGCCGTAGGCAGTAACCTAACAATTGG  
CTGTGCCACCAGTTGTGGCCAGGGTGATGATCTTTAAGCATCAATGGTGAAGGATGCTC  
TGGGATAGGCTGCTGTGACAGCGCCATCCCCAAAGGGATCAAGCACTACAAGGTTTGGTT  
TGACACACACTTCAACACATCAGTCATCCACAATTGGTCCCGTTGCAGTTATGGAGCGTT  
AGTGGAGGAGGCCAGCTTCAAATTTCTCCACGATTTATGCCACGTATCGAATTTAGCAA  
CCCTTTCCGTGGTGAGCCTCCATTTGTGGTGGACTGGGTTGTAGCAAACAATACCTGCGC  
CGAAGCAAGAAAACATTTAGATTCAATATGCATGTGCTAGCAGCAACAGCGTGTGTATTGA  
CTCGAGCAATGGACCAGGATACTTCTGCAAATGTTCTCAAGGATTTGAGGGGAATCCTTA  
CCTTCAGGTCATGATGGTTGCCAAGATATTAACGAGTGTGAGGATTCTAATAAGTACCC  
TTGCTATGGGAAGTGCATCAACAACTTGGAGGATTGATTGTTTTGCCCTGCGGGTAC  
TCGAGGAGATGCTTCTGTTGGACCATGCCGAAAAGAGTTTCCACTAGCATTCCGTATTGC  
AATTGGCCTAGGAGTTGGTTTCGGAATTTCTTCTTGTCTTAACCGTAGCATTCTTGT  
CCGTAAGAAAGAAAGATGATATCCAAAAGCAATTAAGGAAGAAATATTTTCGAAAAAATCA  
AGGCCTTCTTCTAGAGCAACTTATATCATCTGATGAATGCGCTACTGATAGCACAAAAAT  
TTTCACCTAGAAAGAGTGAAGAGGCAACAAATAACTTTGATCCAGCACGTGTTCTTGG  
TAGTGGAGGGCATGGTATGGTTTACAAGGGCATATTGTCCGACCAGCGTGTGGTAGCTAT  
AAAAAAACCAACATCATTAGGGAAGAAGAGATTAGTCAGTTCATCAACGAAGTTGCAAT  
ACTATCGCAGATAAATCATCGGAACATTGTAAAACATTTGGATGTTGTCTTGAAACCGA  
AGTCCCTCTACTGGTGTATGACTTTGTCCCAAATGGCTCACTAAATTGCATTATTCACGC  
TGATCCAAGTATGAGAGAATTCACATTGTCTGGGATCAGTGCTTGAGAATTGCCACCGA  
AGCTGCGGGAGCTTTATATTACCTCCACTCTGCAGCATCAGTATCTGTTTTACATCGTGA  
CGTGAAATCTTCAATATACTTTTGGATGCCAACTACACCGCTAAGGTATCAGATTTTGG  
GGTATCAAGACTGATTCCTAATGATCAAACCCATGTTTTTACAAATATCCAAGGCACATT  
TGGGTACTTAGATCCTGAGTACTACCATACCGGGCATCTAAATGAGAAGAGTGATGTCTA  
CAGTTTTGGTGTGTTCTTTTAGAGCTGCTTCTCAGGAAGCAACCTATTTTTGACAGTGA  
ATCTGGTTCAAAGAAAAATTTATCTATTTACTTCTTTCTGAGCTAAAAGGAAGGCCAGT  
TGCAGAGATAGCTGCTCCTGAAGTTCTTGAAGAAGCAACTGAGGATGAAATTAACATTGT  
CGCCTCAATTGCCCGGGCATGCTTGAGGCTTAGAGGTGAAGAACGGCCAACATGAAGCA  
AGTAGAGATGTCAATACAATCTATAAGAAATAAAGGTTTCAGATCAGGCACAGTTTCTCC  
AGAAGATAGCGATGAGCTGCAAACCTCCACAATCAGAAGGACATGTAGATTATCATCAAGC  
TACGGGGATTGGAATCAACAGTATGGCTAATTTAGCATCTCCAGGTTGCTATAGCCTGCA  
GGAAGAATTTATGTTATCCGGAAGTCTTCCACGGTAACTATGATTGTGATGCTGTTAAA  
TTGTTGATGATGATTTTCTACCTTCAACATAGCTTGTCAATTTCCCATCTATCTTAT  
TGTAAGAAAATACTTGTGTACATATTGTGTTACATCATTAACAGTCTGGTACACCTTCT



GCTC

>OsWAK39 9632.t02794, Chromosome 4, pre-processing  
ATGGCGGCATGTCTTGCCGCTGTTGCAGCATCCTGCCAGAGGAAGTGCGGTGAGATAGAC  
ATCCCTTTCCCGTTCCGGCATCGCCGGTCAGCCCGGCTGCGCCATGACCGGCTTCAAGCTG  
AGCTGCAACGACACCGGGAACGGCGTGCCACCCTGCTCCTGCGGAACGTGGAGGTGCTC  
GGCATCTCGCTGCCGTTAGGTCAGGCTCGGATGAAGATGGATATGTCCTACGACTGCTAC  
AACACGACAAGGAAGGATATCGACTGCGTCGATATGGTTGATCTGAACCTGAAAGGGAGT  
CCCTTCACCTTTCTCTGACACTGCTAACAAGTTTATTGTCTTTGGGTGCCGTATGCTCGCT  
TATCTTGGCCCAGGTGAACAAAATGATGTAGGTAGCAACCTAACTATCGGTTGTGCGGCC  
ACTTGTGGTATAGGCGATGATCTCGTGAGTATCAACAGTGCCGGGTGCTCTGGGATAGGT  
TGTTGCCAAACGAACATCCCTAAGGGGATCCGGTATTACAAGGTTTGGTTGACGGTCGT  
TTCAACACAACGGACATCTACAACCTGGACTCGTTGTGCTTACGCAGCACTTGTGAGACA  
TCCAGCTTTAATTTCTCCACGGTTTACAATCCCTATCAAGGTTCAATGACAATCTTGGT  
AGCCAGCCACCTTTTGTGGTGGACTGGGCTATTGGTAATTCACATGTGAGCAAGCTAAA  
ACAAATTCAGATTCTACATGTGCATAAGCAGCAATAGCGTCTGTTTGAACCTCGCGAAAC  
GGACCCGGTTACATCTGCAACTGCCAAAATGGATTGGAAGGAAATCCTTACCTGAACGAT  
TCGTTTGGTTGCCAAGGTAAATTTCTCAACTAGAGGCTTTTGTGGCTAGAGTATTGCAT  
TTACATATCATCTATTAGCAACTAGCATACTTTAGCTTTAAAGTACATGTATTTACCAAA  
ATATTGCATCTTTGTCTAGAGCGTATTTACATGTCTATTGAGGGGGGGGGTAGGATATAG  
CGGTATAAGTAGGTATGATATCAAAATTTTATAAAATTTGTGATAACTATTTATTACTCATG  
TTGTATAGGATTACTCTTATTAGGTTACATAGATCAATGATCCTACTTAAGGATTGTATA  
AGGAATTATCTGTCTACCTATTGATGTGCCAGTTTTTAGGAATTTCCAAGTAGACATAAA  
AGGTGTGAATTAATTTAGCATCCATTTAGGACGGAAGCAAATTATTATGTTTCAGGTAAA  
ACAAAAGGAGTCCATATGAGGTGCAAGTTGGTAAGTATTAAGTCTAACATCAAACTAG  
AGTTTATACTTCATATGAGCTACGACTTGTCAATTATTATCATGAAACATATGTATTATT  
AAATTAAGAAAAACACTAATATCTTAGATGAGAGGTAATCTGCTATTTTGTCCAATCTGC  
TTTTAGCCAAATCTTGAGTTCATGGAACGGACAGCAAGCTGATTATCAGGTTATGATCTC  
CGTAATTCACACTAGTTTAAATTGTCTAGGTTTGTGTGCTGGCATAGGAAAACAAATCTG  
ACCAGCTAGCTTATTCATCATTTTGGTGGATGTATTCAATATCTTTGGTTGAAGGGCTA  
AAGGACTTTGGTGAATGTGTTAATTAATGTGTGTTAGTTATAACTACTTGTAAACAAAT  
GAAATAAGTATCTTGCAGTTAAACCTCGAAAATGAGTAAATTTGTGGTGGAACTATTG  
ACTTAGGTGAAACTCGTGTAACCTCTCACAAAATGTGATGAGGTGGTGTATCTAAATGTG  
ATATTGTTTTAAAAAAATAAATTAGATTTACATGACTTTTTGATCGGGTTTAAATGAGTT  
TTCACCGCATAGTTATCCCCCTCCCAACCAAAAAACAAACTCTAGAACTACCAATTC  
GGAATGGTATGAAGTGTGTGCTAGCATTTTCATAAATCATCATGCTTTTGTTTTATTCAC  
AAGCAACATAATATATTTTGACATAAGTTATAAATTGGATTGTAGATATTAATGAATGCG  
AGGATTCTAGTGAAGTACCTTTGCTACGGGAAATGCATCAATAAACCTGGCGGGTATGATT  
GTTTTTGCCCTGCGGGTACCCGAGGAAATGCTTCTATTGGACCATGTGCGAAAGAGATT  
CATTGCTTACTGGTACACATATATTATCATCTGAGTATATTGTTTTGCCATAACCTCTAT  
GTACTTGAATGTTTATGTAGAAACCATTTACATCCCTACAATTTATGAAAAGGAAATTC  
ACATTCTTTCTCAAAATGTTTTCTTTGTACTTGAATGTATCTGCATGCATAGACACTGT  
TTTTTAAATGAAAATTAATCAAATTTCTTCTCTATTCTACATTGTTTTATATATTCAG  
AAGTTGGCACAGAATCTGAATCTACTCTAAAAGAAAAAAACTGGTACAACAAGTTATT  
TAATTAGTTCAATATTTGAACCTCTTAATTGACTCATATCAGAACAAGGTTTCATTTAAGT  
TATCACTGCATACTTTAGCATATCATTAAATTTTACTAGCAAATACAAAAATCTTATA  
AGGGTCCCTAAATGTAGGTATTGTTATCGGTATGGCTGCTGGTTTTGGAATTCTTGTACT  
TAGCTTATCTGTGGTACTCCTTATCCGTAAACAAAGAAGTGACATTCTGAAGCAACAACG  
GCAAAAAATATTTTAGGAAAAACCAAGGCCTTCTACTACAGCAGCTTATATCATCTGATG  
AAAGAGCTAGTGATAACACAAAAATTTTCTCCTTAGAAGAGCTGAAACAGGCAACAACAA  
CTTTGACCCAACACGTGTTCTTGGTAGTGAGGGCACGGCATGGTTTACAAAGGCATTTA  
TCTGATCAACGTGTGGTGGCTATAAAAAACCTAACATCATTAGGGAAGAAGAGATTACT  
CTATTCATCAATGAAGTTGCAATACTCTCACAGATAAATCATCGTCATATTGTAAACTC  
TTTGGATGTTGTCTTGAAACCGAAGTCCCTCTATTAGTGTATGATTTTGTCCCAAACGGT  
TCACTAAATCAAATTTATTCAGGTGCTACAAGTAATAGGGAATCATCATTGTCTTGGGAT  
GATTGTTTGAGGATTGCTACAGAAGCTGCGGGTCTTTGTATTACCTTCATTCCGCAGCA  
TCAGTATCAGTTTTACACCGTGACGTGAAATCTTCTAATATACTTTTGGATGCAAACTAC  
ACGGCTAAAGTTGCAGATTTTGGTGCATCAAGATTGATTCCTAATGATCAAACCCATGTT  
TTCACCAATATACAAGGCATTTTCGGGTATTTAGATCCAGAGTACTACCATACTGGACAT  
CTGAATGAGAAGAGTGATGTGTATAGCTTTGGTGTAGTTCTTTTGAAGTCTTCTCAGA  
AGGCAACCCATTTTGAATGTGAGTCTGGCACAAAGAAAAATCTATCTATTTATTTCTTT  
TATGAGATAAAAGGAAGGCCAATTACTGAGATAGTTGCCCTGAAGTTCTTGAGGAAGCG  
ACCGAGGATGAGATAAATACAGTTGCCTCTATCGCACAGGCATGCTTGAGGCTCCGAGGT

OsWAKs-Supplemental Data 1[1].txt

GAAGAAAGGCCAACTATGAAGCAAGTGGAAATGTCATTACAATCTGTAAGAAATAAAGGT  
TTCAGTTTCAGCTGGTACCAGCCCAGAAAGCAATCATGGGATGCAACCAGCCCTATCCGAA  
ACATATGTAAATCTGCATCAGCCTCTTGGAGTTCATACAATTGGTATAATTAATTTAGCA  
TCTTCAAACCTGCAATAGCTTGCAAGCAAGAATTTATGTTATCCGCTAGTTTCGCAAGGTAA  
ATTATATTACTCCGGCTATTGAATTATTTCTAGATGTTTTCTATTATATTATTGGGAAC  
ATGTGCATTCCCAATCAATCTGTATGTCCTAAATAATACGTTTTGTTCTCATTTGTGA  
AACATTATTAATTGTTTGTGTGAATTTAATGCAATTTGTTTTGTATGCTTCATGCTGAAA  
CTTTTGGTAAGTTCTCATCTCAAATTGGATTCTTATAACAGTGAACCTTGTCTAATTTT  
TTTAGTGAGATGTGTGACTTATTTTTCTCTCATTTTTTTTTACTTGTCAAATATATCT  
ATCAATATTCAGTATTGTGGACCTCGTGGTTTTTCGGTTACCTCGTACATATGTTTTGT  
TACAAGATTAATAGGCTAGTTATTGTAGCAGAGACGACTCTTCTATCTCTGTTTGTAAATA  
TTTTCAAATCCTAGTGCAATGTGTCCGCATTTGGAAAACCTCCATCTTGAATATTATGGA  
CTTCATGTGAAATACTTCAAGTTGCAAAGACATTACGCTTGTAGCCAAAAAGCTTGAATA  
ATTTTCAGAATGTGGAATACTTCAAGGGTTTTATTTCTTATTTACCACCGCAAATTCGCA  
TGATTTCTGAGCTTGATGTGTCACTGATATGTGTTCCCTAGACCCACATATCGTTATGAGA  
GGAAAAGAGAAACAAGGGAATGTATCAACTTTCCATGCAAATTTGAATGATCCATTTAC  
GTTTCGCTGAAAAAACTGCACACTTGTGTTCAATTACGTCATTGTTCCATTGAAAATGG  
TACTAGATGCAAGTCTCTTAGGCTCTTACTCTCCAACCGGACCTGGGAACAACCTACTCA  
CGACATCATTTCCAAAAACAAGTTAGAAGTCATAAATTACTGCCAAAAAGATTTAACGGCT  
TTCTAATAACCCCAAGCTCTAAGAGCCAGTTCAAGATGCTCAGTGAATGTACCATATAT  
CTTAAAGCACGGTGTTACCTTTAAAGTAATCACTAGGTTTTCTTCGTTAAATTCACGTA  
TATGCATAGTATTTTTGACCGCCTCGCTCCAGATGCCCACTAGAATGACAATTCATAAT  
AGCCATTCTTGAGCAAATATAATTTAAAGTGCAGTAAGAAATTGGATTCCACGAAAACA  
TTTTTCCCAAATATATCCAAAGAGAAAACTTCCAAGTTTTAAGTTTAAGAGTATAT  
ATGTATCAACTATGCATCGCCATTTGCATGAAAAGCCTACTGCAGTTGAAAAGAATCAAG  
TTTCTATCCATTGTTGAGTGAGTGCATCCATACTATAGATGGCCATGTGGGCCACCCGG  
CACAGCACGGCCCGGCGCTTGCCTAGGCCGAGGCTTGTGGGCCGGCACGGCCCG  
ACCGACGCACCGGGCCGTGCTGTGCCAGCCACATGCCGCACTCACGGCCCAACACTACT  
CGGGTTGTGCCGGCCCGGCTGAAGGCACGACGGCCTATCCTGCTTTTCTCAGAATAAA  
TCTAATTTTTCTTCTCCTATTGGGTTGTGACATATATATAACTAAAATAAGTCTATT  
TAAGGTCCTATGTTTTGGACAGTGACATTTATATGTCTATTTTTAGTCCCTATACTTTG  
TGTGCCGGCCCTGGCCTGCTGGCCCATCGTGCCGGGCCAGCCAGCGCGCCGTTGGGGAG  
GCCAGGCATGGCCCGGCGGTGAGGCTGGGCTGACACAGGCCCGACCCAAGTCGGGCCGT  
GCCGTGCTTGCGCCAGGCCAAAATGCCGTGCCGTGGGCCGGACCTTGGGGCCTCGGGCCT  
TATGGCCATCTATACTCCATACATTAA

>OsWAK39 9632. t02794, Chromosome 4, post-processing  
ATGGCGCATGTCTTGGCGCTGTTGCAGCATCTGCCAGAGGAAGTGCAGTGAGATAGAC  
ATCCCTTTCCCGTTTCGGCATCGCCGGTTCAGCCCGGCTGCGCCATGACCGGCTTCAAGCTG  
AGCTGCAACGACACCGGGAACGGCGTGCCACCCTGCTCCTGCGGAACGTGGAGGTGCTC  
GGCATCTCGCTGCCGTTAGGTGAGGCTCGGATGAAGATGGATATGTCCTACGACTGCTAC  
AACACGACAAGGAAGGATATCGACTGCGTCGATATGGTTGATCTGAACCTGAAAGGGAGT  
CCCTTCACTTTCTGACACTGCTAACAAGTTTATTGTCTTTGGGTGCCGTATGCTCGCT  
TATCTTGGCCAGGTGAACAAAATGATGTAGGTAGCAACCTAATATCGGTTGTGCGGCC  
ACTTGTGGTATAGCGCATGATCTCGTGAGTATCAACAGTGCCGGGTGCTCTGGGATAGGT  
TGTTGCCAAACGAACATCCCTAAGGGGATCCGGTATTACAAGGTTTGGTTCGACGGTCGT  
TTCAACACAACGGACATCTACAACCTGGACTCGTTGTGCTTACGCAGCACTTGTGAGACA  
TCCAGCTTTAATTTCTCCACGGTTTACAATTCCTATCAAGGTTCAATGACAATCTTGGT  
AGCCAGCCACCTTTTGTGGTGGACTGGGCTATTGGTAATTCACATGTGAGCAAGCTAAA  
ACAAATTCAGATTCCTACATGTGCATAAGCAGCAATAGCGTCTGTTTGAACCTCGCGAAAC  
GGACCCGGTTACATCTGCAACTGCCAAAATGGATTGGAAGGAAATCCTTACCTGAACGAT  
TCGTTTGGTTGCCAAGGTAAAACAAAAGGAGTCCATATGAGGTGCAAGTTGATAAATCAT  
CGTCATATTGTAAACTCTTTGGATGTTGTCTTGAAACCGAAGTCCCTCTATTAGTGTAT  
GATTTTGTCCCAAACGGTTCACTAAATCAAATTATTCATGGTGCTACAAGTAATAGGGAA  
TCATCATTGTCTTGGGATGATTGTTGAGGATTGCTACAGAAGCTGCGGGTGCTTTGTAT  
TACCTTCACTCCGACGATCAGTATCAGTTTTACACCGTGACGTGAAATCTTCTAATATA  
CTTTTGGATGCAAACTACACGGCTAAAGTTGCAGATTTTGGTGCATCAAGATTGATTCCT  
AATGATCAAACCCATGTTTTACCAATATACAAGGCACTTTCCGGTATTTAGATCCAGAG  
TACTACCATACTGGACATCTGAATGAGAAGAGTGATGTGTATAGCTTTGGTGTAGTTCTT  
TTAGAAGTGTCTCTCAGAAGGCAACCCATTTTTGAATGTGAGTCTGGCACAAGAAAAAT  
CTATCTATTTATTTCTTTATGAGATAAAAGGAAGGCCAATTACTGAGATAGTTGCCCT  
GAAGTTCTTGAGGAAGCGACGAGGATGAGATAAATACAGTTGCCTCTATCGCACAGGCA  
TGCTTGAGGCTCCGAGGTGAAGAAAGGCCAACTATGAAGCAAGTGGAAATGTCATTACAA

OsWAKs-Supplemental Data 1[1].txt

TCTGTAAGAAATAAAGGTTTCAGTTCAGCTGGTACCAGCCCAGAAAGCAATCATGGGATG  
CAACCAGCCCTATCCGAAACATATGTAAATCTGCATCAGCCTCTTGGAGTTCATACAATT  
GGTATAATTAATTTAGCATCTTCAAACCTGCAATAGCTTGCAGCAAGAATTTATGTTATCC  
GCTAGTTTCGCAAGTCCCTATACTTTGTGTGCCGGGCTGGCCTGCTGGCCCATCGTGCC  
GGGCCAGCCCAGCGCGCCGTTGGGGAGGCCAGGCATGGCCCGGCGGTGAGGCTGGGCTG  
ACACAGGCCCGACCCAAGTCGGGCCGTGCCGTGCTTGCGCCAGGCCAAAATGCCGTGCCG  
TGGGCCGGACCTTGGGGCCTCGGGCCTTATGGCCATCTATACTCCATACATTAA

>OsWak40 9632.t02799, Chromosome 4, pre-processing  
ATGGGGAACGGCGATGAAGGTGTGGCGGAGGCTGAGACGGCGAGTAGCGGCTTCACCGGC  
GTGGCGGCGAGATGAGGATGGGTTGACTATGTGGTTGGTGGAGGTGCGGTGAGGACGTC  
AGGGCCGCGACGAACAGGGCCAGCGTTACTTCTTCTCAGCGGGAGGGAGCACTGGACG  
CCGGTGGGCGTCACCACGACTGTCCATCCATGGTGGGTACAATTACTGTACCCCATGGAC  
TTTTGACGCGGTGAGGCACTGAAGGATTTATGGCCGGCGCTGGTGTGGCAGGGTTGGAG  
GAGCAGCAACGACGGTGATGCAGCCTGAGGGTTGTGGCGGTGGCCACCAACCCTCGTCC  
GGCGCTCAGTGTGGCGATGGTGGGGATGGTGACGACTCCTCCTCGAACGACGGAGGAGGT  
GGCGCAGACGGCGAGCGCTTGATGGCGAGGGAGGCCGAGAACGGCATCCATGATCAAAT  
GAAAGGTAGGCATCGTACCTTCTGGTACTGATTCTTTCGCTTTTCCTTGAGATCAAAAGC  
GATGGTTTCTTCTCTTCACTTAGAGCGAAGTGCTGATAACGTGTTAAAGTGAATAGAATT  
GATTGGAGCGAGAGAGATTGAGCGTGAGAGAATGTAGAGGGAATGAATGAGCCGATTCTT  
TTATTGATCAGCGTGTTACAATATATAGGGGGAGAGAGGCGGCAACCGAAGACGCGATG  
GTTTGGGAACCATCGCGTCCGTTACTAGAATCGCCATGAGGGCGAGAAGATGTGGGGCAC  
GACACAACCATCGTGTCCCTGAATTGGTTGCTGCTCTATCCATATAGATGGATGAGATCA  
CCCAAACCTTTTCATAACATTATTAACGTATTTTTTTAGTGTCTGGTCATCAATTTGAATA  
TGCCTTTGTCAATAAAAAACTACGATGACACAATTTCACTGTCTGTTAATGTAATAACTA  
TCGAAAAATGTCACCGTTGTTGATAGAATCACGATGGCTAATATGCGGTTGTTAATAAGA  
GTAACGATGGTTGAAAAAATACCGTCTGATGATAAAGTAGCAACGGGAAATATTGTGTGGTC  
GTTAATACTATTAACGACGGAGCCTTTAACGACCACTGACGACAATTTTTTTGTGGTTAA  
ATGATCTTAATGACCACATAATGACCTTCAGCGACCAAATTTACCGTCTGTTAATACTCTT  
TTTCTTAGTAGTGTTTTATGAGTAAATTGCTCAAAATTGTAATAAAACTACATACAAACT  
ATTGTTCCACAAAACACACATTTATGTAGGAACAATACAAAACCGAGCCTACAAGAGA  
GGTGAATGTTAGCATTAGCAAAATCAAAATCTTTTTGTGGAATGAAAATGTGCCTTTGAC  
CTGATGAAGTTATGACCATCCAGTGTGTAGATGCCCGCAACAATTAACGGAATAAACCT  
ATATTTTTAGACGTATATTGCCCTTGATATTGTATACTAAAGTGATTATACATAATTAA  
TTCTTATCAAGATTTATTGTGCCACACAATATCATATTATTATACTTTGCGTGAGATAT  
TTAATATATGATATGAATTGAATTGAAACTCAATTGCACAGATCATATAAAAAATATATTT  
TTTTTGCTAACATGAAATTTTATAATTTTTTTGAAGGCAAATAAAATTACACCGTAGCGTT  
TAGCAGGGCAGATTACTAGTTTATGTAGGAACAAGACAAAAACAAACCAAGCCTACAAG  
AGAGGTGAATGTTAGCATGACAAATCAAAATCTTTTTGCGGAATGAAAATGTGCCTTT  
GACCTGATGAAGTTATGACCGTCCGGTGTGTAGATGTCCGTCCGTCTGAATGTGCCTTAA  
CTGAGTCGGATTATGTGCTGCCAGAAAATGCACTCTGCAGTCACTAGACTATCCGATCA  
ACCAAACCTGTTGATGTCCTAGAAGCCAGACCGACAGTGCGATCCACCAGACTATTCATGC  
CCTAGAAGTTGGACCAACCAGGAAATTCAGAAAAACTCTTGAAAGTAGACCAACTTTAT  
TTCTTTATTTTAAAGATGTGCTTACAAAGTACACTCAAAACACTCATCTCTAAACTCA  
CAATATAAAATCAAAAGCCTCAAAGTAAATCTTTTTTTTTTTGTCTCACGAAATTTGATAT  
ACTCTAGCTTCAACACCTCTTCTATTATACCCAGAACCTCGCTACGAATCCAACCTTAA  
CTAGAAAGCCCACTCACGTAGGAAACCCCTCGAACTAGGGAAACAACATCACTTTACACC  
ATCAACCTTTTCAAACCTTGATTTCAATCCAAATTTGACTCTGTTTCCCAAACGCACACA  
AATTCCTGTGTGTGCCATATGGAACCTTCACTTCCATGCATATTGTTCTCTAGTCTGAGC  
ATTCGCGACGATGTCCTTGTCGATGATGATCATATGTTATACACCCATATCCTAAA  
GCAAAAGATACACATGGAACCAAGAACCATATATGAGTACAAAAATTCGCAAGAAT  
GAACCTCACATCAGCATAAACACAGTTTTTAATACATATATAACAATCTAAAAGTAATAA  
ACATAAAGCAATCTAGAAAATCCACGAAAACAACCTCGAAATCGACTCAAACATTGAGTCT  
GGCTTGGTTGGACCGTTGGGCCGGTCACTGCTGACCACTGTTGATGGTTAGTCTGCTCAT  
TCAGCACTACCAAACCAATCCGTCGGTCAATCCAGAGCGACACCATTTTGCCCAATTT  
CAACACAAACACATACCTTTTATAATTATTCATGACATAGATTAAAGCATCATAGGATCT  
CACAATTTCTTCCATGATGAACACATGACATTATCTCCAAAATACAAATTGATGTTTTTT  
TAATAATAAAAAACAAAGAAGTGTCATAAGGCATTAAATGGCCTAAAAAATTATGTTTTCAA  
ATGTGGCAGCAAGATAAACTCTCCCCTTTTCAAAAAAAAAAAAAAATTCTCCACAAATTT  
GCAATAGAAGCACAAAATCGACTGTTTTTAAATCAAATTTTCTCTCTTGAAGAAACAT  
GCGTTTTGTATTTTCTCCACCATCCACCGAGATGATTTTATCAAGAATTTCTTAAGA  
GAAAATATAAACCAATAAAAAACAATGCCATGATTGCAAGATTGCCACCTGTAACCATC  
AATTTTTTATTTCTGATTTTTTTCTTTAACAGCTTTGAGATATACCTAAAGCAATTTAA

OsWAKs-Supplemental Data 1[1].txt

GGTCATGTATTGTAAGAAAAGGGAGATAAATTCATCAATTAGTTAACAAGCATGCACCGG  
AGTATAAACATTTCAAATGTATCATAAAGCTACACATAGAAGCCATGGTATAGCCAACAT  
ACAAATTTTAAACACATAATTATATTTGTCTAATAACTACATATGTAGAGGTTCTCCCTT  
TCATTGTTGTCATGATTGTCTTTTTACCATTTAGATTTTGTGATAACTTGTGCAATAT  
CTGTAATTTTGAACAATGTGGCTTAAATATGTTGTGTTGTAATTCATGACAAAATTT  
TTTGAAATACAACGGCTTAAGTTTCGTGAAATTTTCTCAAAATATACACAATTTTGTGAA  
TTTTTCTCGTTTTTTCATTACATAAAAAATTTACATTTTTTTTACTCATCTAAGAGATTAAG  
CTAGGGTTTTCTAGAAGTTCTCTAATTAGTAAGAGATTTCCAGTAGAGCAAATGTAACG  
ATTCAAGACTTTTGTGGAGGCATGTTGGTGATTTCAATGTTATTTTCCCATGTAAACAGGA  
TATAATCCTTTTTCAGCAGAAGGCAAACCTGTTCCCGGTCATGTGGGAATATCACAGTTCCC  
TATCCATTTGGTCTCGAAGAAGGTTGTTTTGCCAGAAAACCTATTCCATCTCAACTGCACA  
GAAGCAAACCTCTTCAACTCTGCGATTGACAAGTATAATCAGGTGACTGACATCAAAATT  
GAGGAAGGAGTTGTGCTGATTAATATGACGCTGGTGGTGGTGGTGGTATCAGGAGTTTATG  
GCGATAGACGGAGAACCACATCTATATGATGGCTCTTGGGATTACTCTATCTCTGTTGGA  
TGGGCTGTTGCCAATCTAACATGCAATGCTGGAAGCAAACAGAATGCCTCTGGATATGCATGC  
GTTAGTACTAACAGCACTTGTGTTCCAGTGAACCTCTACTTCTGGTTATGTTGGCTATCGG  
TGCAACTGCACTGCCGGTTTTCATGGAAATCCTTATATGCTGAATGGATGCATAGGTAAA  
GAACATTAG

>OsWAK40 9632.t02799, Chromosome 4, post-processing  
ATGGGGAACGGCGATGAAGGTGCGGTGAGGACGTCAGGGCCGCGACGAACAGGGCCAGC  
GGTTACTTCTTCTTCAGCGGGAGGGAGCACTGGACGCCGGGTTGGAGGAGCAGCAACGAC  
GGTGATGCAGCGTCGAGGGTTGTGGCGGTGGCCACCAACCCTCGTCCGGCGCTCAGTGTG  
GCGATGGTGGGGATGGTGACGACTCCTCCTCGAACGACGAGGAGGTGGCGCAGACGGCG  
AGCGCGTTGATGGCGAGGGAGGCCGAGAACGGCATCCATGATCAAATGAAAGGATATAAT  
CCTTTTTCAGCAGAAGGCAAACCTGTTCCCGGTCATGTGGGAATATCACAGTTCCCTATCCA  
TTTGGTCTCGAAGAAGGTTGTTTTGCCAGAAAACCTATTCCATCTCAACTGCACAGAAGCA  
AACTCTTCAACTCTGCGATTGACAAGTATAATCAGGTGACTGACATCAAAATTGAGGAA  
GGAGTTGTGCTGATTAATATGACGCTGGTGGTGGTGGTGGTATCAGGAGTTTATGGCGATA  
GACGGAGAACCACATCTATATGATGGCTCTTGGGATTACTCTATCTCTGTTGGATGGGCT  
GTTGCCAATCTAACATGCCTGGAAGCAAACAGAATGCCTCTGGATATGCATGCGTTAGT  
ACTAACAGCACTTGTGTTCCAGTGAACCTCTACTTCTGGTTATGTTGGCTATCGGTGAAC  
TGCACTGCCGGTTTTCATGGAAATCCTTATATGCTGAATGGATGCATAGGTAAAGAACAT  
TAG

>OsWAK41, 4577.t00022, Chromosome 4, pre-processing  
ATGATCCGCTCACCACACGCCGCGAATTCCTGCAACTTTTGCTTGTCTTCTCTGCTGGCG  
ACGACGACGCTACTGACATCGGCGAAGGATTTGGCTGCGCCAAGAAGGCAAGAAGGGCAT  
GGCCGGGTGGTTCCATCAACGGCCACCCTCGCCGGTTGCCAGAGCTCATGCGGCGATCTG  
ACCTTCGTGTACCCCTTCGGCATCGGCTCCGGCTGCTTCCGAAGTCCCGACTTCGAGCTC  
ACCTGCGACTCCACCACAAGCCCTCCGAGACTCCTCTTCCACGATGGTATCACCCAAATT  
GCTGGTAGTATTAACATCGTTTCTACAGAGTTTATGGACACAGATAACAGTGTTAGCACC  
CGCTTTTCTCATACCATCTCCATGAGAAATGCATCCGTTGTGAGCTGGTCGTTATCTCCA  
AAATTGCTTGAACATTCTCTTGATGCTTTTTACCTGACGCTGTGGGACTACGTTTCTCC  
GGCTGTGACTTTGATGTTTATTGGTTAAATCGTCCATCAATCAACAAAGCAACTCCCAAC  
TGCACAGCAACCTGTCCTAAAGGAGAGAGCACGGGTATGGTGTCTCCTATGCAGCATTGC  
AACGGCACAGGATGTTGCACTATCGACTTTGGTGCCGAGATCAATGCTTATTCATCTACT  
ATCGAATTTAAATTCGTCCGCCAAGCAGAAACCAATCTAGAATCGTACCATAACCGAAGC  
TTGTCATGGGATACGATCTATATCACTGATCCTGCTTCGCGTGGTCTCAGTTGGAAGATC  
CCTGATCAACCAGACTGCGCAAGCGCCGTAACCAACAGACGAGCTATGCTTGTGTTAGC  
AACAAGAGCATTTGCATCGACCCAGACGACGTCAAACAAGGCTACAACCTGCATGTGCCGT  
AATGGCTACATAGGCAATCCTTATATTTTGGATGGCTGTTACCCGAATAATGGTAATCTC  
CAAACCCAATGTTTTTTTAAATGCGTACTAGCATTTGTTTGAAGACAGCGATAGACTAA  
ATCCCTTTATTAGAAATGAAGTACCTCGTCAATCTTGATCCAATTTGAAGGGATTAAAT  
CAAATATGCACATATCTCTCTCATAGAAACAGAAGCTGTAGTCCTATAGCCTGCACATCT  
TTTTTTTAAAGCCAATCTGACGCAACAAATATGGAGAAGTGTAGAATAAACTATCATT  
AGTTCAAATTTTCTTACTTACCAGTCATATAAGTTTACACAACACACTGTAGGTAAGCTT  
AATATATATACAACCTCTAGTATAACTTTATTTTAAATTTTCAATTGATTGTTTTTAAATTTAT  
CTGTTGACGAAGATGCATTGTGATATATTAATTAGAATATTTTTCATTCTCCATTGGTAG  
GGATTGTAAAAGTGATAGCATTCAATTAAGTTAGATTATACTCTGTGTTACCTTCTCAA  
TAACTGAATATGAGTGTATCAATGATGATCTAGTGGCAGAAAAAAGTGATACATAGA  
CAATTTCCGGCAATTTAGATAAATAGTTTTGAAGATTCAAATATATATGCTAATAATCATG  
AATGATTTATTTTTCTTTTCTTTGGAATCAGAGTATAACCCATTACAACGGAAAAATGAAT

OsWAKs-Supplemental Data 1[1].txt

TGTATCCGCCAGTGCGGGAATATCAGCGTTCCATTCCCGTTTGGCTTGGGAAGAAGGTTGT  
TTTGCAACAAAAGGATTTTACCTCAACTGCACAAATTCGACATCATCAACCCTCCTATTG  
GAAGCTAGCCAGCATCAAGTGACAAAACATATACGTGGACAACGGGACTCTTGAATACAT  
TGACCAGGGAGCTTATTATTATGAACCGGGGCTACAAAGTTTCTATTTTCAGGTTGGGAC  
ACCAATTGTTTCTGTCTATGGGTTGCTGCTCATCTAACATGTCAAGATGCAAAACGAAA  
CAGCTCTGGATATGCCTGCATAAGCACCAACAGCGAGTGTATAACAAGCAAACCTACTGA  
TACGTTTGTGGTTACCGATGCAAATGTGCACAGGGATACCAAGGAAATCCATACATAAC  
AAATGGTTGTGTCGGTACGTACTCCCTGTCTCAAGTAAACATTAATTGTAATGCACTTC  
ATAGGACATTGTCATTTTATCCATGAACCTTCTACCGGAAAAAAGTTAAGATCGACACCAT  
TAAATGTTCCCGTTCTGATTTAAGGTTAAGTGAAGTAGGATTGGGCAGGGTCATCTCAA  
GGAAGTTAAGGCTTAATTTGGCATGAAATACAGATAGGTCTAAAATTACAAGAACTGTA  
ATACTTTCAATTAATCACACAACCTTCATTTCTACTATACTAGGAATGAATGCAATGTTA  
AGGTTAAAAAAATTAAGGTTAGTACTCAAGCAGTAATCCAACCTCATGTTATTTCTTT  
GATTAAGATTACTTAAGTAAGTGGATTAGGATTTGGGGCCAATTTTATAGGCCCTATGC  
GGTTGGTCAACTCGCCATGCTAATTGACGGTCTAGGAGGATTAATGTGAAATTTTAATT  
ATATTTTAAAGGGATGGTCGTAGGTGGTGGTCAAACCACCGGTGACCGGCGGATATAG

>OsWAK41, 4577.t00022, Chromosome 4, post-processing

ATGATCCGCTCACCACACGCCGCGAATTCCTGCAACTTTTGCTTGTCTTCTGCTGGCG  
ACGACGACGCTACTGACATCGGCGAAGGATTTGGCTGCGCCAAGAAGGCAAGAAGGGCAT  
GGCCGGGTGGTTCCATCAACGGCCACCCTCGCCGTTGCCAGAGCTCATGCGGCGATCTG  
ACCTTCGTGTACCCCTTCGGCATCGGCTCCGGCTGCTTCCGAAGTCCCGACTTCGAGCTC  
ACCTGCGACTCCACCACAAGCCCTCCGAGACTCCTCTTCCACGATGGTATCACCCAAATT  
GCTGGTAGTATTAACATCGTTTCTACAGAGTTTATGGACACAGATAACAGTGTTAGCACC  
CGCTTTTCTCATACCATCTCCATGAGAAATGCATCCGTTGTGAGCTGGTCGTTATCTCCA  
AAATTGCTTGAACATTCTCTTGATGCTTTTTACCTGACGCTGTGGGACTACGTTTCTCC  
GGCTGTGACTTTGATGTTTATTGGTTAAATCGTCCATCAATCAACAAAGCAACTCCCAAC  
TGCACAGCAACCTGTCCTAAAGGAGAGAGCACGGGTATGGTGTCTCTATGCAGCATTGC  
AACGGCACAGGATGTTGCACTATCGACTTTGGTGCCGAGATCAATGCTTATTCATCTACT  
ATCGAATTTAAATTCGTCCGCCAAGCAGAAACCAATCTAGAATCGTACCATAACCGAAGC  
TTGTCATGGGATACGATCTATATCACTGATCCTGCTTCGCGTGGTCTCAGTTGGAAGATC  
CCTGATCAACCAGACTGCGCAAGCGCCCGTAAAAACCAGACGAGCTATGCTTGTGTTAGC  
AACAAGAGCATTTGCATCGACCCAGACGACGTCAAACAAGGCTACAACGATGTGCCGT  
AATGGCTACATAGGCAATCCTTATATTTTGGATGGCTGTTACCGAATAATGATGCAAAA  
CGAAACAGCTCTGGATATGCCTGCATAAGCACCAACAGCGAGTGTATAACAAGCAAACCT  
ACTGATACGTTTGTGGTTACCGATGCAAATGTGCACAGGGATACCAAGGAAATCCATAC  
ATAACAAATGGTTGTGTCGGGATGGTCGTAGGTGGTGGTCAAACCACCGGTGACCGGCGG  
ATATAG

>OsWAK42, 4577.t00017, Chromosome 4, pre-processing

ATGCGGGGTGACTGGAACGAAGACCGATGGCGATGACAAGAGGTAGAGCTCACCGGCGA  
CCGAGGAAGGAGGAGCTCCGGCGGATTTCCGGCGAAGAGGGGCGGCCGGCGAGGTCCTC  
CTCGTCTTTCGGGACGTGAGGAGGCAACGGCGGAGTCGACGTGACCGAAGCGGCGGC  
GCGACGCGGCTTGGAGGCGGTGAAAGGGGCGGCGGCTCGGGTGTGCGGTGGGAGTGGTG  
CTCGAGGGGTGGAGAGGGGGAAATAAGAGGCGGCGGACTTCCCTTGCGGTGGCGAAGC  
TGGCGGTGGCGGTGGCTCGGCGCGGCGACGGCTGTGGCGGCGGGAACGGCGACCGGAGC  
TCGCCGAGTGTTGGCAGCGCGTGGGTGCGGCGTGGGGAGAGCGAGGGAGAGTATGCCGGG  
CTCGGGAAAAATGGGGAAACGGACGAGGGGAGCACGGGGATGCTTTTTATGGGCTCGGGA  
AGGCGGGATCGAGGCCGGACGTGGCGGAATCGGCCGGCGAAGTGGGGCGCGACGTGGGG  
TGGTGGAGGGGTTAACCGGCGCGGATTTTCGCGGGGAGAGTGGGGGAAATGGTGGAGGGC  
GTGGAGGGGATCGTGCCACGTGTTGGATGCGAGCTCGGGTGCGGGAGGGCGCCGGATT  
TTGCGGCGACGTGGACGGCTATGGCGGTTGGGGTCCGCCGGCGAGAGGTAGGAGGAGGAG  
CTGCTGTCCGCGAAGGGAGAGAAGGAGGGACGCAAAACAGACTTTTGCGAGCGGGCCAAG  
TGAGAGGGGAGCGGCGGAGAGAGGAGAGGCGCGCGGGCGGGGAGAGGAAAGAAG  
ACTTGGGCCGAAAAATGGCCAAAGAGAGGGAAGGGGAAATTTTATTTGTTTTCTTTTTAT  
TTTAATTGATGCAATGATCTTTGTGTTATTAATAATTTCTTGAGCTCCGAAAATTCAC  
GGAAAATTCGGAGAGTATTTTAGGGCACAAAGAATATTGCAAAATATTCCCGGCAATG  
ATTTTTAAGGGAAAATTTTAATTCTCCATTATTTCACTTGATTAAATTAATTTAACTTT  
TATTTAATTTCTAGAAAATGCATTATTTAATGATTTTTAAACCCGAACGAAAATCGGGGC  
GTTACACAAACTAGCAGATCTACGTTGTTACCGATATCTACAATACGCACTTCTAAATTA  
GTACAACATAAACCATAAAAAATAATGCAATTTATTCAAACAATTTTTTAAAAATACAC  
ACTATTTAACTCAATAGTCACATATAGGATCTGCGAATATTACCTGAAATCGGCGTCTGA

# OsWAKs-Supplemental Data 1[1].txt

ATCCGGCAGGGCTTCGCCCTTCTTCTCTCTCTACCTCTCTTCTTTTTTCACTGG  
AGTTGAGAGGTGAGAAATGAGGGCTGGGGCTGGGCGGCAGGCCTTTTATAGGTAGCGAGG  
CCTGCCGCCCGCCAGTGGGCGGCAAGGGGCGCCTGCAAAATGGCTGGCCCCCTGCGGC  
TCTTTTGCATTGCGACCCCTTGCCGCCCAACAAAGGGCGGCAAGGGTTTTATGCAAAA  
TACCCACCCTCCGTACAGCCCGTTCTCCCCGTTTCCACGTGAGCTTGCTGCCACC  
ATTGGGGCGGCAGGGTCTATTTTTGCAATTTTTCTCGCAATAGATTATTTATGTAAATA  
TTAAAAAAAATCTAAAAACGAAAAAAATTCCTACTTACCTCCCAAACGGCTGCCTAG  
GTGAATATGTTTCTCTAGATTCTAGTCCCATCCCATCGTTTTAGCGTGGTTCTAATTCTG  
TGATATTTCTACAGTTTCATATATGCACTTACCGTATAGGCTAGTTCTTTCTTCTCTCA  
TAAAGCCGTACATATTGAATTTGATTATTATCACAAGGTTTATATAGAACGCGATGATAT  
TGTTGAGTCCGTGGTATAGTTTGAACACTGAGATCAACACGAAAATCCTTGATTTTTGG  
AACGAATTTTGTATATTTTAGGACAGATGGGTATTTGGGAAGTGCTATACCCAGAAA  
CCATCATGCAGGTGCGGAGCCAACGTGGGGGTGGGAGGGGNGGGCTCGAGCCCCACTAC  
CCCGCTGGACTCCTAGAAGTTGTGAGAGAGGAGAAGGGGGAAGAGGGAGAGGAAGAAG  
AAGGGGGCCGGGAGGGGGCTGGAGGAGGAAGAAGAAGGCTGAGCCCCCTCTCTCCAAA  
CCTAGCTCGGCCACTGCCATCATGCAAGTAGCGTTTTTACATGATTGTAATTAATAT  
GTTCTGCAAGTACTAATACATCGTCAAAAAGTTGTAATACTTGCCAGGATTACAAAG  
ACGTCACTACTAGTAAATACATCTCCATAATGTTGTAAATGCATCCTCGTGAACTTTAA  
TCGGCGAGGAAGCGATAGCACCCAAGAGCTTACTATATATCTACCTATCATTCTGTATTG  
TTTATTTAATATATATTTGTGTCTTTCTTTCTCGAGTTCAATTCATATGCCAAAAAAA  
ATGCTAAATTGCTAACTTTTTTCAATATAAATTTCTTCTATTGATGAATAATTTCCCTA  
TATGTAATTATTTGTGTAGATATTGATGAATGCAAAGAACCGAAGAAATACCCTTGTTAT  
GGAACTGCAAAAATATACCAGGGCATTTCGACTGTACATGCCCTAAGGGTACCCGAGGA  
AATGCCTTTGTTGAAGGAGCATGCCAAAAAATCATCTTAACATCCGGAGTACGAATAGCA  
ATTGGTACGCACCTATACCAACTCTATCTCATCACGTACATATACTTTCAATATAGTTGA  
GGCTTCCAACGTCTTGAATTCATTGCAATATACTAGTTTTTGTGTTGACTTCTGATGTG  
TTTCGTGTGGAATGTAACAAAAACTCTTGATCTACTTGATTGGTTATGGCTTACATAA  
ACGTAAAACAATACTGATGTTAACATACTTGCTTAGACCATAAATTGATTACAACCTCCA  
ATTTGTTCTGTTGAGGAGTTGTTGCGGGTGCATTGGTTGGCTCTTTGGTTTCTTGATG  
GGGGGTGATCAAGTACAAACAGAGAATAAAAAACAAGCTCTATTAAGACAGGCTGATGA  
GTTTTTCAACAACACGGAGGTGAGTCTCTTAGAAATGATGAAGGTAGAGGGCAATGC  
GGGTTTACCCTCTATGAGAGAGAGCGGATCAAGATTGCAACAAATAACTTCAACAAGGC  
ACACATTATTGGGAAGGAGGACAGGGAAGTGTACAGAGCAGTGATAGATGGCACTAC  
CATGGCAATAAAGAGGTGCAAGGAGATTAATGAGAGCAAAAAAATGGACTTTGTGCAGGA  
ATTGGTCATCTTTGTGCGGTCAACCATAACCATCGTCAGGCTGTTGGGTGTTGCCT  
TCAGTTTGAGGACCTATGCTTGTCTATGAGTTTGTGCAAAACAAAACACTACAAGAGCT  
GTTGGATCTCCAGAGGAGCAAGAGGTTTATGTCACACTAGGAACACGTCTAAGGATCGC  
TGCAGATCCGAGATGCAATTTGCACATCTACTCGTGCACGTCCAATACTCCACGG  
CGATGTGAAGCCAGCCAACATTTCTTCTCGCAGAGGATTGGTTGCGAAGGTGTCGACTT  
TGGTTGTTCAACAATCGATGAGAAAACCAAGTTGTGCCAAAAGGTACACCAGGCTATAT  
TGATCCGACTATCTACTCGAGTACCAGCTCACAGCCAGCAACGATGTATATAGCTTTGG  
AGTCATTCTTCTCGAGCTTCTCACTAGTAGGAGGCCATTTTCAAAAGAAAGGAAGAGCTT  
AACATCAATGTTTCAGGAAGCTATGGCAAATGGCACACTTGTGAGCTCCTTGATAGCGA  
CATAGTTGATGAAGTACGATGCGAGTGATCCAACAAGCCGCGTTCTAGCTAATCAATG  
CTTGTTGTTCCAGGTACAACAGGTCCACAATGATGCTAGTGCCACAGAGCTCTGACG  
GCTAGCATTAGCAGATGAAGTGCAGCAGTACCCACAACCGCCATTGGTGCTTGAGGACCT  
AAGCTTTACGGGGATAGGGAGAACATCGATGTCTACATGGTACGGTGGGAGCAAAACAAA  
TGGGGTTTATGGCCTCTCGAAGAAAGCTGTGCCGAGCATAGAGTTTGCAGATGA

>OsWAK42, 4577.t00017, Chromosome 4, post-processing  
ATGCGGGGTGACTGGAACGAAGACCGATGGCGATGACAAGAGGTAGAGCTACCGGCGA  
CCGAGGAAGGAGGAGCTCCGGCGGATTTCCGGCGAAGAGGGGCGGCCGGCCGAGGTCCTC  
CTCGTCTTTCGGACGTGAGGGAGGCAACGGCGCGAGTGCAGCTGCACCGAAGCGGCGGC  
GCGACGCGGCTTGAGGCGGTGAAAGGGGCGGCGGCCTCGGGTGTGCGGTGGGAGTGGTG  
CTCGAGGGGTGGAGAGGGGGAATAAGAGGCGGCGGACTTCCCCTTGCGGTGGCGAAGC  
TGGCGTGGCGGTGGCTCGGCGCGGCGACGGCTGTGGCGGCGGGAACGGCGACCGGAGC  
TCGCCGAGTGTGGCAGCGCGTGGGTGCGGCGTGGGGAGAGCGAGGGAGAGTATGCCGGG  
CTCGGGAAAAATGGGGAAACGGACGAGGGGAGCACGGGGATGCTTTTTATGGGCTCGGGA  
AGGCGGGATCGAGGCCGACGTGGCGGAATCGGCCGGCGAAGTGGGGCGCCGACGTGGGG  
TGGTGGAGGGGACAGATGGGTTATTTGGGAAGTGCTATACCCAGAAACCATCATGCAGAT  
ATTGATGAATGCAAGAACCAGAAATAACCTTGTATGGAACTGCAAAAATATACCA  
GGGCATTTGCTAGTACATGCCCTAAGGGTACCCGAGGAATGCCTTTGTTGAAGGAGCA  
TGCCAAAAAATCATCTTAACATCCGGAGTACGAATAGCAATTGGAGTTGTTGCGGGTGCA

OsWAKs-Supplemental Data 1[1].txt

TTGGTTGGCCTCTTTGGTTTCCTTGGATGGGGGGTGATCAAGTACAAACAGAGAATAAAA  
AAACAAGCTCTATTAAGACAGGCTGATGAGTTTTTCAACAACACGGAGGTGAGCTCCTT  
CTAGAAATGATGAAGGTAGAGGGCAATGCGGGTTACCTCTATGAGAGAGAGCGGATC  
AAGATTGCAACAAATAACTTCAACAAGGCACACATTATTGGGAAGGAGGACAGGGAAC  
GTTTACAGAGCAGTGATAGATGGCACTACCATGGCAATAAAGAGGTGCAAGGAGATTAAT  
GAGAGCAAAAAATGGACTTTGTGCAGGAATTGGTCATCCTTTGTGCGGTCAACCATACC  
AACATCGTCAGGCTGTTGGGTTGTTGCCTTCAGTTTGAGGCACCTATGCTTGTCTATGAG  
TTTGTGCAAAACAAACACTACAAGAGCTGTTGGATCTCCAGAGGAGCAAGAGGTTTCAT  
GTCACACTAGGAACACGTCTAAGGATCGCTGCAGAATCCGAGATGCATTTGCACATCTC  
TACTCGCTGCCACGTCCAATACTCCACGGCGATGTGAAGCCAGCCAACATTCTTCTCGCA  
GAGGGATTGGTTGCGAAGGTGTCCGACTTTGGTTGTTCAACAATCGATGAGAAAACCCAA  
GTTGTGCCAAAAGGTACACCAGGCTATATTGATCCGGACTATCTACTCGAGTACCAGCTC  
ACAGCCAGCAACGATGTATATAGCTTTGGAGTCATTCTTCTCGAGCTTCTACTAGTAGG  
AGGCCATTTTCAAAGAAAGGAAGAGCTTAACATCAATGTTTCAGGAAGCTATGGCAAAT  
GGCACACTTGTGAGCTCCTTGATAGCGACATAGTTGATGAAGCTAGCATGCGAGTGATC  
CAACAAGCCGCGGTTCTAGCTAATCAATGCTTGGTTGTTCCAGCATTAGCAGATGAAGTG  
CAGCAGTACCCACAACCGCCATTGGTGCTTGAGGACCTAAGCTTTACGGGGATAGGGAGA  
ACATCGATGTCTACATGGTACGGTGGGAGCAAAACAAATGGGGTTTATGGCCTCTCGAAG  
AAAGCTGTGCCGAGCATAGAGTTTGCAGATGA

>OsWAK43, 4577. t00014, Chromosome 4, pre-processing  
ATGACTAGCCACAGAGGACTAACAACAACACGCTGTGCCTCGCCATAGCGATTGCTGCA  
GAGCTCCTCGCTGGGAGAGCAGAGGGGCAATGCCAGAACACCAAGTGTGGCGACGTTGAG  
ATCCCTTACCCATTACGACACAGCTTGACAAGTGCGCCGCGTCCGCCTTCGAATTCGAC  
TGCAACGACACCGGCAACGGCGTCTACAAGCCCTTCTACGGAAATGTGGAGGTGCTCAGC  
GTCTCCCTCCAGCTTGGCCAGGTCCGGGTGATGAATCACATCTCTCTTCTGCTACAAC  
TTATCTTCTAAGGAGATGGACTCCGACACGTGGCAGCTCAACATGACTGGCACGCCGTTT  
ATGCTCTCCGACTCCAACAAGTTCACGGTCGTGCGCTGCCGGACACAAGCCTACATCGCC  
GACCAGGATTACGTGGGGAAGTACATGAGCGGGTGCCTGTCCGTGTGCCGGCGAGGTGAT  
GTGTGGAAGGCGACAAACGGCACCTGCTCCGGGATAGGCTGCTGCCAGACGGCCATCCCA  
AAGGGCCTGGATTACTACCAGGCCTTCTTCGACGACAGCAGCATGAACACGTGGGGATC  
TACAACCGCACCCCTGCAGTACGCGGTGCTAATGGACTCTCCAACCTTCACTTCTCG  
ACCACCTACTTGACTACATCGGAATTCAACAACACCTATGATGGCCGGGCGCCTATGGTG  
CTCGATTGGGCCATCCGGAGCGCCAACAGTTGTGAGGAGGCATGGAAGAAGATGGACTCT  
TACGCGTGCAAAAGTACCAACAGCGAGTGCTTCAACTCAACCAACGGACCTGGCTACACC  
TGCAACTGCTCCAAAGGGTACGAAGGCAATCCTTACCTCGAAGGACCCAACGGCTGTGCA  
GGTGAATTTTCTATAATCCCATCAATACTACATCTAGAATTCTAAAATTGTGACAGTTC  
ATATGAATAGCTTACGCGTGAGCTTTTATGATTTTTGTTTTCTTACTCCATCCGGCTA  
TATTTTTAAGAAATAAGTTTAGTTGGTCCATTTATAAAATTTCCAATACATAGTCTGTTT  
ATGATTCTGACTTTTTTCCATTAATCCCATTTTATATTTGAAATTTCTCCACGTTTCCAT  
TTTCCAGATTACCAAATTTCTTTCCACATCTTACAAATTCGTATTTTTATTTTGTAG  
ATATTGATGAATGTCAAGATTCCAAGACTCATATTGCTATGGAGAATGCCGTAATAAAC  
CTGGCGGTTTTGATTGTAAGTGTCCAGCGGGCAGCAAAGGAAATGCTACCATTCCAGATG  
GATGCCGAAAAGACTTCCGCTTGGCGCTAAAAGCACGACTGGCAATTGGTAGGCACATGT  
TTTACAATCTCTTTTTTTAAGACTATGTTTTACTGCTGCATATCTGGTCGACATCCATG  
TTAAAACCTACACATGCTCAAATATTTCCACTAATGTCAGATATTTGTTTATCCAGGAGC  
GGTTATCTGCGTATTAGTTGGCCTCTTTAGTTTCCTTGGATGGGAAGTGATACGCCACAA  
AAGGAGCATAAAAAACAAGCACTATTAAGACAGACTCATGAATTTTTCTACAGCATGG  
TGGCCAGCTACTTCTGGAATGATGAAAGTAGAGGGTAATGTTGGATTACCCTCTATGA  
GAGAGGGGAGATTGAGACTGCCACAAGTAACCTCAACAAGGAACACATCATCGGTGAAGG  
TGGCCAGGGAAGTGTATAGGGCGGCTTGAACGGAGTTAATGTTGCAATAAAAAAGTG  
CAAGGAGATCGACGAGAGCAGAAAGATGGAATTTGTGCAGGAGTTGGTCATACTTTGCCG  
TGTCAGGCATCCCAACATTGTCAAGCTACTTGGATGTTGCCTCCAGTTTGAGGCGCCAT  
GCTTGTGTACGAGTTCGTGCAGAACAAACACTACAAGAGTTACTAGATCTCCATAGGAG  
CAAGAGGTTCCATGTAACCTTTGGAACCCGCATGAGGATCGCTGCAGAATCTGCCGAGGC  
ACTTGGCATCTTCACTCGTTGCCACACCTATAATCCACGGCGATGTGAACCATCCAA  
TATCCTACTTGTGAGGGATTGATCGCAAAGGTGTCTGACTTTGGCTGCTCGACAATCGA  
TGAGAATACTCAAGCTGTACCCAAAGGAACACCAGGTATATTGATCCAGACTACCTACT  
AGAGTACCAACTCACATCTAAGAATGATGTATATAGTTTTCGGAGTTATTCTTCTTGAGCT  
TCTAACTAGTAAGAAGCCGCTGTCAAAAGATAGGAAGAGCCTCACCTTGATGTTTCAGGA  
GGCAATGGCAGAGGGCACACTCTTTGAGCTCCTTGATAGTGACATGGTTGATGAAGCTAG  
TATGAGAGTGATGCATCAGGCAGCTGTTCTAGCAAGTCAATGCTTGGTTGTTCCAGGTAT  
GACAAGGCCGACAATGGTGCTGGTGGCAGCGGAGCTCCGGCGCCTAGCACTAGCTGATGA

OsWAKs-Supplemental Data 1[1].txt

AGTGCAACAATGCCCACAACCGCCGCTTGTACTTGAGGATTTGAGCTTTGTGGAGATGGG  
AAGCACAACCAAGTGGAGTTTATAGCCTTGAGAAGAAAGCTGTGTTGAGCATAGAATTTGC  
AAGATGA

>OsWAK43, 4577.t00014, Chromosome 4, post-processing  
ATGACTAGCCACAGAGGACTAACAACAACAACGCTGTGCCTCGCCATAGCGATTGCTGCA  
GAGCTCCTCGCTGGGAGAGCAGAGGGGCAATGCCAGAACACCAAGTGTGGCGACGTTGAG  
ATCCCTTACCCATTACGACACAGCTTGGACAAGTGCGCCGCGTCCGCCTTCGAATTCGAC  
TGCAACGACACCGGCAACGGCGTCTACAAGCCCTTCTACGGAAATGTGGAGGTGCTCAGC  
GTCTCCCTCCAGCTTGGCCAGGTCCGGGTGATGAATCACATCTCCTCTTCTGCTACAAC  
TTATCTTCTAAGGAGATGGACTCCGACACGTGGCAGCTCAACATGACTGGCACGCCGTTT  
ATGCTCTCCGACTCCAACAAGTTCACGGTCGTCCGGTGCCTGACACACAAGCCTACATCGCC  
GACCAGGATTACGTGGGGAAGTACATGAGCGGGTGCCTGTCCGTGTGCCGGCGAGGTGAT  
GTGTGGAAGGCGACAAACGGCACCTGCTCCGGGATAGGCTGCTGCCAGACGGCCATCCCA  
AAGGGCCTGGATTACTACCAGGCCTTCTTCGACGACAGCAGCATGAACACGTCCGGGATC  
TACAACCGCACCCCTGCAGCTACGCGGTGCTAATGGACTCCTCCAACCTTACCTTCTCG  
ACCACCTACTTGACTACATCGGAATTCACAACACCTATGATGGCCGGGCGCCTATGGTG  
CTCGATTGGGCCATCCGGAGCGCCAACAGTTGTGAGGAGGCATGGAAGAAGATGGACTCT  
TACGCGTGCAAAAGTACCAACAGCGAGTGCTTCAACTCAACCAACGGACCTGGCTACACC  
TGCAACTGCTCAAAGGGTACGAAGGCAATCCTTACCTCGAAGGACCCAACGGCTGTGCA  
GATATTGAGACTGCCACAAGTAACTTCAACAAGGAACACATCATCGGTGAAGGTGGCCAG  
CCTGGCGGTTTTGATTGTAAGTGTCCAGCGGGCAGCAAAGGAAATGCTACCATTCCAGAT  
GGATGCCGAAAAGACTTCCGCTTGCCGCTAAAAGCACGACTGGCAATTGGAGCGGTTATC  
TGCGTATTAGTTGGCCTCTTTAGTTTCTTGGATGGGAAGTGATACGCCACAAAAGGAGC  
ATAAAAAACAAGCACTATTAAGACAGACTCATGAATTTTTTCTACAGCATGGTGGCCAG  
CTACTTCTGGAATGATGAAAGTAGAGGGTAATGTTGGATTACCTCTATGAGAGAGGG  
GAGATTGAGACTGCCACAAGTAACTTCAACAAGGAACACATCATCGGTGAAGGTGGCCAG  
GGAAGTGTATAGGGCGGCCTTGAACGGAGTTAATGTTGCAATAAAAAAGTGCAAGGAG  
ATCGACGAGAGCAGAAAGATGGAATTTGTGCAGGAGTTGGTCATACTTTGCCGTGTCAGG  
CATCCCAACATTGTCAAGCTACTTGGATGTTGCCTCCAGTTTGAGGCGCCCATGCTTGTG  
TACGAGTTCTGTGAGAACAAAACACTACAAGAGTTACTAGATCTCCATAGGAGCAAGAGG  
TTCCATGTAAGTCTTGAACCCGCATGAGGATCGCTGCAGAACTGCGGAGGCACTTGC  
CATCTTCACTCGTTGCCACACCCCTATAATCCACGGCGATGTGAACCATCCAATATCCTA  
CTTGCTGAGGGATTGATCGCAAAGGTGTCTGACTTTGGCTGCTCGACAATCGATGAGAAT  
ACTCAAGCTGTACCCAAAGGAACACCAGGGTATATTGATCCAGACTACCTACTAGAGTAC  
CAACTCACATCTAAGAATGATGTATATAGTTTCGGAGTTATTCTTCTTGAGCTTCTAACT  
AGTAAGAAGCCGCTGTCAAAAGATAGGAAGAGCCTCACCTTGATGTTTCAGGAGGCAATG  
GCAGAGGCGACACTTTTGACCTCCTTGATAGTACATGGTTGATGAAGCTAGTATGAGA  
GTGATGCATCAGGCAGCTGTTCTAGCAAGTCAATGCTTGGTTGTTCCAGGTATGACAAGG  
CCGACAATGGTGTGTTGGCAGCGGAGCTCCGGCGCTAGCACTAGCTGATGAAGTGCAA  
CAATGCCCACAACCGCCGCTTGTACTTGAGGATTTGAGCTTTGTGGAGATGGGAAGCACA  
ACCAGTGGAGTTTATAGCCTTGAGAAGAAAGCTGTGTTGAGCATAGAATTTGCAAGATGA

>OsWAK44 9632.t02820, Chromosome 4, pre-processing  
ATGGCTTCTATGGTGAGCTAACAATATCATGTCTCACGGCCATAGCTGTTGCTGGGGCG  
GCGTTGCTCGCCGGCGGCGCAGAGGCGCAATGCCTGCACACCTGCGGCGGCATAGACATC  
CCTTACCCTTTTGGCATCGGATCTGACGGCGACTGTGCATTGCCTTTTTACAATATCGAC  
TGCAACAACAAAAACCATTCTACCGAGATGTGGAGGTCTCAGCATCTCCCTCCAGCTT  
GGTCAGATCAGGGTGAGCACCCCATATCTTCTTCTGCTACAACCCCTTCTCTAAGAGG  
ATGTACTCCAGCGGGTGGGGTTCAACCTGTATACACACCTTTTATGCTGTGCGACTCC  
AACAAGTTCACGGTGTGCGGTGCCAGTCATTGGCCTACATTTCCGACCCAACCAGCAAC  
TACACGAGCGGCTGCGCGTCTCCTGCCCGGGTGGTAAAGTGGTGAGCGCCACCAACAGA  
ACCTGCTCCAGGATAGGATGTTGCCAGATAACCATCCCAGAGGCATGGAATTCTGCAAG  
GTGTGCTTCCGGGAGAGCATGAACACATCGGGAATCTACGAACACACCCCTGCAGCTAT  
GCAGCGATAATGGACTACTCGAATTTCACTTTCTCAACCAGCAACTTGACTTCTCTGCTA  
GAGTTTAAACAACACTACAGTGGCCGAGCGCGGTGAAGTTTGAAGTGGCTATCTGGGGT  
CCCCGAGACTGCGTGGAAGCGCAGAAAAATCTCACATCGTACGCGTGCAAAAGCGACCAT  
AGCGTGTGCCTCAATTATTCAGTGGAGCAAAATCAGCCTACATGTGCAACTGCTCCAAA  
GGATACCATGGCAATCCTTACCTTCAAGGCTCAAATGGTTGTGAAGGTAAAATATGCCTA  
TAGATTTTATTCTCATCAAAGCTACAAGTTTTAAATAATTATAGGTATTTCTGACAGTAA  
GTATAATATAGAGTTGTATGTATTGCAATAGAGTGTATAAACAGCTATCTTTTTTCTCT  
CAATATTTAACGAGCATATACAATTAATGAACCCACTTCTGGTATACACCCCTCGT  
TCTAAATGAATAATGCCTTCTGCTACGAGTCCACATTTTATGTTATTAGAGGGACGTAG



OsWAKs-Supplemental Data 1[1].txt

GCTTTAAAAAATAGCATAGCACACTGCTTATTTACCCATCTGCATTTCTCCTCAGATTAG  
 AGATGACAATGGCCCCATTTTCCGTGGTGAATTCACCCATTAGGAGCAGGCATGGTTAGA  
 ATTGGTTCTTCATGGGGACATAAAGGGGAGGAGGCTTGTCCCGTCGGTTTTACGAGGG  
 TGGGGATGGTTCTTCATTCCTTGTCCCCACTCCCGTGGAGCTCCACATAGGTATCCAAG  
 TTTAATGTGATTATATTAATTATTATATTTGATAAATGATAATCATATGTTTTATCGTG  
 TGAAATAGTATATAATATTTCTAGATATATGTTGATATATTAATATAAAGTGCGTATATA  
 CGTTGCATTGCATATATAATTTGACATGTGTATATTGCTTTAAGCGGGGACGAATATCCT  
 GCGGGGATTTATTTCTGTGCGGGGTGGGGATGGGAACAAAGTTTCCCGTTGTTTTATC  
 GCAGGGATGGCGATGCATTCCTCCCGACGGTGAATTCCTGTTGCCATCTCTACCTCGGATC  
 CAATGTGTTTCTATGTACTTTAGCCTCTCAACTATGTGAATGCGCGTTGCTGCTGCTTCT  
 TGTTATTTTTAAAGTACAGAGTGCTGTTAATACCATAAAAAAATTAATGAAGTCCATG  
 AAAGTCATGTCGTCTCGGCATGCATAGTCGCAAGTATAATTTCTATAGTTAGCATGCC  
 TTTTATAAACCAACTTTTTTTTCCATGTAGCTTTGTCTTTAATTTGTGTGCATATCATC  
 ACTTTTTTTTTTGGGGGTGCATATCATCAGTTATAAATATTTCTATAAAAGGTTTATA  
 TTTGATTGCAGATATTAATGAATGTGAACATCCTGAGAGTTACCCGTGCTATGGAGAATG  
 CCACAATAAAGACGGCGGATTTGATTGTTTCTGTGCGTATGGTACACGAGGAAATGCCAC  
 TATTCCAGGAGGGTGCCAAAAAACTTCTTAACGCGAAAGGCACGAGTTGCAATTGGTAC  
 GTACTTACTCCAATACCGTGTTCCTCATATTATGATATGCTCGATCAGGTATAGACACA  
 CAGATGTTGAAATAGTACCTTGATAAACCTTTTCACTAATGAAAAACATTATCTCTCAA  
 GGTGTTGTTGCCTGCATATTATCTATCCTCTTCGGTTTCCTTGGATGGGAAGTGATACGG  
 CACAAAAAGGAGCATAAAAAAGACAAGCTTTATTAAGACAAAACGATGAGTTTTTTCAACAG  
 CACGGAGGACAGCTATTGCTAGAAATGATGAAAGTAGAGGGCAATGCAGGGTTTACACTC  
 TACGGTAGACAAGAGATTGAGACTGCCACAAATAACTTCAACAAAGCGAACATCATTGGG  
 GAAGGAGGGCAGGGAAGTGTATAGGGCGGTATTGGGTGGAATCGCCGTGCAATTA  
 ATGTGCAAGGAGATTGACGAGAACAGGAAGATGGAATTTGTGCAGGAAGTGGTCATACTT  
 TGCCGTGTCAACCATCCCAACATTGTCAAGTTGCTCGTTGTTGCCTGCAGTTTGAGGCA  
 CCCATGCTTGTGTACGAGTTTGTGCAAAACAAAACACTGAAAGAGTTGTTGGATCTCCAA  
 AGGAGCACGAGGTTCCATGTCACTAGGAACCCGCTAAGAATTGCTGCGGAATCTGCC  
 GGGGCATTTGCGCATCTGCACTCATTGTGCGACCCTATACTCCATGGTGATGTGAAGCCG  
 GCCAACATCCTACTGGCTGAGGGATTGGTCGCAAGGTGTGCGACTTTGGCTGCTCAACA  
 ATTGATGAGAGTACTCCGGCTGTGCCAAAAGGCACGCCAGGGTATATTGATCCAGACTAC  
 TACTCGAGTATCAACTACAGCCAAGAATGACGTATATAGCTTCGGTGTTATTCTTCTT  
 GAGCTTTTAACCTGGTAAGAAGCCATTCTCAAAAGAAAGGAAGAGCTTGACCTTGATGTTT  
 CAGGAGGCTATGGTAAATGGCACACTCCAGGACCTCCTTGACAGTGACATAGTCGATGAA  
 GCTAGCATGAGAGTAATCCATCGAGTTGCAGTGCTGGCAAGTCAGTGTGTTGGTTGTTCCA  
 GGTACAACGAGACCGTCAATGGCTTTAGTGGTGGAGGAGCTCTGGCGGCTTGCCTAGCA  
 GATGAATTGCAGCGATACCCGCAGCCACCACTGGTGCTTGAGGAGTTGAGCTTTCTGGAT  
 ACGGAAGCACCAAGTGGGATTTACAGCCTTGATAATAAGGCCGTGTTAAGCACAAACATTC  
 GCTAGATGA

>OsWAK44 9632.t02820, Chromosome 4, post-processing  
 ATGGCTTCTCTATGGTGAGCTAACAATATCATGTCTCACGGCCATAGCTGTTGCTGGGGCG  
 GCGTTGCTCGCCGGCGGCGCAGAGGCGCAATGCCTGCACACCTGCGGCGGCATAGACATC  
 CCTTACCCTTTTGGCATCGGATCTGACGGCGACTGTGCATTGCTTTTTACAATATCGAC  
 TGCAACAACAAAAACCAATCTACCGAGATGTGGAGGTCCTCAGCATCTCCCTCCAGCTT  
 GGTCAGATCAGGGTGAGCACCCCATATCTTCTTCTGCTACAACCCCTTCTCTAAGAGG  
 ATGTACTCCAGCGGGTGGGGGTTCAACCTGTATACACACCTTTTCATGCTGTGCGACTCC  
 AACAAGTTCACGGTGTGCGGGTGCCAGTCATTGGCCTACATTTCCGACCCAACCAAGCAAC  
 TACACGAGCGGCTGCGCGTCTCTGCCCCGGGTGGTAAAGTGGTGAGCGCCACCAACAGA  
 ACCTGCTCCAGGATAGGATGTTGCCAGATAACCATCCCGAGAGGCATGGAATTTCTGCAAG  
 GTGTGCTTCCGGGAGAGCATGAACACATCGGGAATCTACGAACACACCCCTGCACTAT  
 GCAGCGATAATGGACTACTCGAATTTCACTTTCTCAACCAGCAACTTGACTTCTCTGCTA  
 GAGTTTAAACAACACCTACAGTGGCCGAGCGCCGGTGAAGTTTGACTGGGCTATCTGGGGT  
 CCCCAGAGACTGCGTGGAAGCGCAGAAAAATCTCACATCGTACGCGTGCAAAAGCGACCAT  
 AGCGTGTGCTCAATTTCCAGTGGAGCAAAATCAGCCTACATGTGCAACTGCTCCAAA  
 GGATACCATGGCAATCCTTCACTTCAAGGCTCAAATGGTTGTGAAGATTAATGAATGT  
 GAACATCCTGAGAGTTACCCGTGCTATGGAGAATGCCACAATAAAGACGGCGGATTTGAT  
 TGTTTCTGTGCTGATGGTGTGTTGCTGCTATATTATCTATCCTCTTCGGTTTCTTGGG  
 TGGGAAGTGATACGGCACAAAAGGAGCATAAAAAGACAAGCTTTATTAAGACAAAACGAT  
 GAGTTTTTTCAACAGCACGGAGGACAGCTATTGCTAGAAATGATGAAAGTAGAGGGCAAT  
 GCAGGGTTTACACTCTACGGTAGACAAGAGATTGAGACTGCCACAAATAACTTCAACAAA  
 GCGAATCATTTGGGGAAGGAGGGCAGGGAAGTGTATAGGGCGGTATTGGGTGGAATC  
 CCCGTGCAATTAATGTGCAAGGAGATTGACGAGAACAGGAAGATGGAATTTGTGCAG

OsWAKs-Supplemental Data 1[1].txt

GAAC TGGT CATACTTTGCCGTGTCAACCATCCCAACATTGTCAAGTTGCTCGGTTGTTGC  
CTGCAGTTTGGAGCACCCATGCTTGTGTACGAGTTTGTGCAAAACAAAACACTGAAAGAG  
TTGTTGGATCTCCAAAGGAGCAGAGGTTCCATGTCACTAGGAACCCGCTAAGAATT  
GCTGCGGAATCTGCCGGGGCATTGCGCATCTGCACTCATTGTGCGACCCTATACTCCAT  
GGTGTGTGAAGCCGGCCAACATCTACTGGCTGAGGGATTGGTCGAAAGGTGTGCGAC  
TTTGGCTGCTCAACAATTGATGAGAGTACTCCGGCTGTGCCAAAAGGCACGCCAGGGTAT  
ATTGATCCAGACTACCTACTCGAGTATCAACTCACAGCCAAGAATGACGTATATAGCTTC  
GGTGTATTCTTCTTGAGCTTTTAACTGGTAAGAAGCCATTCTCAAAAGAAAGGAAGAGC  
TTGACCTTGATGTTTTAGGAGGCTATGGTAAATGGCACACTCCAGGACCTCCTTGACAGT  
GACATAGTCGATGAAGCTAGCATGAGAGTAATCCATCGAGTTGCAGTGCTGGCAAGTCAG  
TGTTTTGGTTGTTCCAGGTACAACGAGACCGTCAATGGCTTTAGTGGTGGAGGAGCTCTGG  
CGGCTTGCGCTAGCAGATGAATTGCAGCGATACCCGCAGCCACCCTGGTGCTTGAGGAG  
TTGAGCTTTCTGGATACGGGAAGCACCAGTGGGATTTACAGCCTTGATAATAAGGCCGTG  
TTAAGCACAACATTCGCTAGATGA

>OsWAK45 9632.t02822, Chromosome 4, pre-processing  
ATGGCGTTCCAGTTCCACACGCTACTATCAGCCGTAACAATATGGCTGGGCGTAGCGGCT  
GCTACGGCGAGGCTCCATGCCGCCGTGCGCGGAGCAGGAGCGCCGCCGCCGCCGCCG  
CCCGGCACTGCCAAAGGAAGTGGCGGACGTAGACATCCCCTACCCGTTCCGGCTGTGG  
AACGGCAGCGAGTCCGACGGCTGCGCCGTTCCAGGCTTCTACCTGAACTGCGACGTGAC  
GACAACCACGTCTACAGGCCGTTCCACGGGAATGTGGAGGTTCTCAGCATCTCCCTGCCG  
ACCGGGCAGGCCCGGGTGACGAACCTCATCTCCTCCGCTTGCTACAACACCAGCTCCCGC  
GACATGGACTACAACGACTGGCAGATCAACTTCACCGGCACGCCGCTGACGATCTCCGAC  
GCCGACAACAAGTTCACCGTCGTCCGGTGCCAGACGCTGGCGTACATCACCGACGACGAC  
AACATGGGCAAGTACACGAGCGGGTGCCTGCCATGTGCCAGGGAGGCGACCTGACGAGC  
CTCGCCACCAACGGGTCTGCTCCGGGATAGGCTGCTGCCAGACAGCCATCCCCAGGGGT  
CTGAAGTACTACCGCGTCAGGTTGACACGGGCTTCAACACCTCGGAGATCTACAACGTC  
AGCCGCTGCAGCTACGCGGTGCTGATGGAGTGAAGGCCTTCAGCTTCCGGACGAGCTAC  
GTGAGCTCGCTGGAATTTAACAGCAGCAACGGTGGCAGGGTGCCGTTGGTGGTGGATTGG  
GCTATCGGAAACGAGACTTGTGATAAAGCCCGCAGAAAGGTTGACACCTATGCATGTGTC  
AGCCACAACAGCAAGTGCTTCAACTCGTCCAACGGACAGGCTACATCTGCAACTGCTCC  
GAAGGGTACCAAGGTAACCCCTACCTGCAGGACGGGCAGCAGGTTGCACAGGTATGAAA  
ACTGATCCATTTAAGGGTGAGAGAGGAATTGTATACGTGAATATATACACATAAACAAAT  
GAATCACATAGCCAAGTGAGAATTGGTGTGGATATTTCTTGATTTTAAATGCTTTTACGG  
TACTCATTTACTAGCAGAATTGAAATATATAACAGTTGATTATCATAAGCATTTAAAAAG  
TTTAGCCAATGCAAGGTAATTAACATTCATCTACTGTAATTTGGAATGATTTTTCAATTT  
AATTTATTTATTTTACTATATATTTTAAAGTTCAATTTTACCCTTTAAATTTG  
TACTACATAATTAATTTTGAATATATCTTATCACAATTTTACGGGAATTTACTAGCT  
AGATTAATAAATATTTAATATACCCGATTGCTCGAGAGGTTGACACCTGGAATAAAT  
TAAAAATATATATCTATCTAATTAACCTGTTTAGTTGTAATATCAAGACAGTTAAGATGT  
ACTATATTTCCCTACACTTTTTAACATAGCTTATGAGAGAAAACATGCATCAGAATTTTT  
TTTTTGCTTTTATCTTTTGATTAGTTTAGTATGAGTCACAGAATCTGAGGTTTATTATAT  
TATTAATATATGATTAATACAAAAACATCAAAATTTCCACAAGAAAATCATATTGCC  
ATGATATATGATAGCAAAATCACTGTTTATTTTACCTATGTTTGATTAATGCAGATATA  
GACGAGTGTGCGGATCCGAAGTACCCTTGTTCGCTGCCTGGAACCTGCCATAATCTTCCT  
GGCGGGTTGAGTGCTTATGCCCTCGCAGTCGTCCAAAGGCAACGCATTCAATGGGACA  
TGCGAGAGAGATCAAACCTTCATACTGGAGGAAAAGTAGCTATTGGTACTCCATTATCC  
TCGCTTATCATTCCAAGTTCTTTTTCTTATCCAAAAATCAGTAGCTAAGATTTTCTTA  
TGTTAGGCCATAGCATCCACATGTTCCACACCAGTTTATATGGATTCTCCACAAAAGAAA  
ACAAAAACTAATTTTAACTGTGTTGATTAGTCATGGACCCCAACCGATACGTCACTCTCA  
GAACTTTTCAAAAAAGAACTGAAAGTGTAACATAGAGTTCTAAACCGTTAGTCCGT  
TACATGATGTGACCTGTAATTAACCTATTTATTTGGAATAGGAAGATGATTGCATCCCC  
GCCTTTGCATTTAGGATGTACAGTACACAAGCATGCAGTTTAAATTTGAAAGTTTTTCT  
TAAGATAAACAGTATCTGTATATGCAGTGCTGAAGCACTTGTTCATTTCAACCTTTAGT  
CTCCTTTACAAATATTTCTGAGGAATTTCCGGTTTTGCTATCGTTGGCCTCGTTG  
TTTTTCTGTACGAGAAGTGATCCAGCACAAACGAAGTATCAAAAGACAAGCTCTGCAGA  
GACAGACTGACATGTATTTTCAACAACACGGAGGACAGATCTTACTAGAACTGATGAAAG  
TAGAGAGCAGCGCTGAGTTCACCTCTACGACAGAGAGAAGATCGAGGTAGCCACAAACA  
ATTTGCGCAAGGAGAACATTGTTGGCAAAGGAGGGCAGGGGACCGTTTACAAGGCTGTCC  
TCGACGGCACCAGCTGTTGCGATAAAGAGGTGCAACGAGGTTGATGAGAGCAGAAGAGCCG  
ACTCGTGAGGAGTGGTCATCTGTGCTGTCAACCACCCAAATATCGTCAAACTAG  
TCGGCTGCTGCCTGCAGTTCGAGGCCCCCATGCTAATCTATGAGTTCTGTCAGAACAAAGA

OsWAKs-Supplemental Data 1[1].txt

CACTGCAAGAGCTACTGGACCTCCAAAGGAGTAGGAAGTTCCACGTCACACTGGCGACCC  
GCTTAAGGATTGCTGCAGAATCCGCCAATGCACTTGCACATCTCCACTCACTGCCGCGCC  
CAATACTCCACGGCGACGTGAAGCCAGCCAACATACTTCTTGCTGAAGGATTGGTTGCAA  
AGGTGTCTGACTTTGGTTGCTCAACGATTGATGAGAAAACCCAAGCTGTTGTAAAAGGTA  
CACCGGGATATCTCGACCCAGACTATCTACTTGAGTACCAGCTCACAGCCAAGAATGATG  
TATACAGCTTTGGGGTCATTCTTCTTGAGCTCCTAACGGGTAAGAAGCCACTTTCAAAAG  
AACGGACGAGCTTGATCCCAATATTTCAAGGGGCAATGGAAGTGGCAAACCTCGTTGAGC  
TCCTGGACAGTGACATAGTAGATGAAGCCAACATGGGAGTTATCTGTGAGGCAGCATCAC  
TAGCTAGTCAATGCTTGGCTAATCCAAGTTCATCAAGGCCAACAATGAGGCAAGTGGCGG  
AGCAGCTTCGACGACTAGCATTGGCAGATGAAGTACAACAATGCCACAACCGCCGCTAG  
TGCTCGATGGCCTCATCCTCACAGAGATGGGGAGCACAACATCATCATGGTACACAGGAA  
GTGGAACAAGCGGGGTTTATAACCTTGAGAACAATGTCGTTCTAAGCACAGAATTCGCTA  
GATGATCCATAGACCCCTTGCTGCTTTATTGAGTGTTACAATGTGTTGTTTTATCTGTGTT  
AGATTATGAGTTGTGTTGTTTTATCTCTGTGTTAGATTATGAGTTAATTTCTCCAGTTG  
TGGTGGTTGACGGGCTTCCCAATGTGTGCGGCTGTAACCATGCATTGTGAGGAACAAGTG  
AAACAATCATGTTTCACAATATATAATAATTCAAGTGCATCAAA

>OsWAK45 9632. t02822, Chromosome 4, post-processing  
ATGGCGTTCCAGTTCCACACGCTACTATCAGCCGTAACAATATGGCTGGGCGTAGCGGCT  
GCTACGGCGAGGCTCCATGCCGCCGTGCGCGGAGCAGAGCGCCGCCGCCGCCGCCGCCG  
CCCGGCAACTGCCAAAGGAAGTGGCGGACGTAGACATCCCTACCCGTTGCGCGCTCTGG  
AACGGCAGCGAGTCCGACGGCTGCGCCGTTCCAGGCTTCTACCTGAACTGCGACGTGAC  
GACAACCACGTCTACAGGCCGTTCCACGGGAATGTGGAGGTTCTCAGCATCTCCCTGCCG  
ACCGGGCAGGCCCGGGTGACGAATCCATCTCCTCCGCTTGCTACAACACCAGCTCCCGC  
GACATGGACTACAACGACTGGCAGATCAACTTACCGGCACGCCGCTGACGATCTCCGAC  
GCCGACAACAAGTTACCGTCGTGCGGTGCCAGACGCTGGCGTACATACCGACGACGAC  
AACATGGGCAAGTACACGAGCGGGTGCGTCGCCATGTGCCAGGGAGGCGACCTGACGAGC  
CTCGCCACCAACGGGTGCTGCTCCGGGATAGGCTGCTGCCAGACAGCCATCCCCAGGGGT  
CTGAAGTACTACCGCGTCAGGTTGACACGGGCTTCAACACCTCGGAGATCTACAACGTC  
AGCCGCTGCAGCTACGCGGTGCTGATGGAGTCAAGGCCCTTCAGCTTCCGGACGAGCTAC  
GTGAGCTCGCTGGAATTTAACAGCAGCAACGGTGGCAGGGTGCCGTTGGTGGTGGATTGG  
GCTATCGGAAACGAGACTTGTGATAAAGCCCGCAGAAAGGTTGACACCTATGCATGTGTC  
AGCCACAACAGCAAGTGCTTCAACTCGTCCAACGGACAGGCTACATCTGCAACTGCTCC  
GAAGGGTACCAAGGTAACCCCTACCTGCAGGACGGGCAGCACGGTTGCACAGATATAGAC  
GAGTGTGCGGATCCGAAGTACCCTTGTTCCGTGCCTGGAACCTGCCATAATCTTCCTGGC  
GGGTTGAGTGCTTATGCCCTCGCAGTCGTCCCAAAGGCAACGCATTCAATGGGACATGC  
GAGAGAGATCAAACCCCTTCACTACTGGAGGAAAAGTAGCTATTGGAATTTCCGGTTTTGCT  
ATCGTTGGCCTCGTTGTTTTCTTGACGAGAAGTGATCCAGCACAAACGAAGTATCAAA  
AGACAAGCTCTGACGAGACAGCTGACATGTATTTCAACAACACGGAGGACAGATCTTA  
CTAGAAGTATGAAAGTAGAGAGCAGCGCTGAGTTACCCTCTACGACAGAGAGAAGATC  
GAGGTAGCCACAACAATTTGCGCAAGGAGAACATTGTTGGCAAAGGAGGGCAGGGGACC  
GTTTACAAGGCTGTCTCGACGGCACCACTGTTGCGATAAAGAGGTGCAACGAGGTTGAT  
GAGAGCAGAAGAGCCGACTTCGTGCAGGAGCTGGTCATACTCTGTGCTGTCAACCACCCA  
AATATCGTCAAAGTACGCTGCTGCTGCTGAGTTGAGGCCCCATGCTAATCTATGAG  
TTCGTGCAGAACAGACACTGCAAGAGCTACTGGACCTCCAAAGGAGTAGGAAGTTCCAC  
GTCACACTGGCGACCCGCTTAAGGATTGCTGCAGAATCCGCCAATGCACTTGCACATCTC  
CACTCACTGCCGCGCCAATACTCCACGGCGACGTGAAGCCAGCCAACATACTTCTTGCT  
GAAGGATTGGTTGCAAAGGTGTCTGACTTTGGTTGCTCAACGATTGATGAGAAAACCCAA  
GCTGTTGTAAAAGGTACACCGGGATATCTCGACCCAGACTATCTACTTGAGTACCAGCTC  
ACAGCCAAGAATGATGTATACAGCTTTGGGGTCATTCTTCTTGAGCTCCTAACGGGTAAG  
AAGCCACTTTCAAAGAACGGACGAGCTTGATCCCAATATTTCAAGGGGCAATGGAAGT  
GGCAAACCTCGTTGAGCTCCTGGACAGTGACATAGTAGATGAAGCCAACATGGGAGTTATC  
TGTCAGGCAGCATCACTAGCTAGTCAATGCTTGGCTAATCCAAGTTCATCAAGGCCAACA  
ATGAGGCAAGTGGCGGAGCAGCTTCGACGACTAGCATTGGCAGATGAAGTACAACAATGC  
CCACAACCGCGCTAGTGCTCGATGGCCTCATCCTCACAGAGATGGGGAGCACAACATCA  
TCATGGTATACAGGAAGTGAACAAGCGGGTTTATAACCTTGAGAACAATGTGCTTCTA  
AGCACAGAATTCGCTAGATGATCCATAGACCCCTTGCTGCTTTATTGAGTGTTACAATGTG  
TTGTTTTATCTGTGTTAGATTATGAGTTGTGTTGTTTTATCTCTGTGTTAGATTATGAGT  
TAATTTCTCCAGTTGTGGTGGTTGACGGGCTTCCCAATGTGTGCGGCTGTAACCATGCA  
TTGTGAGGAACAAGTGAAACAATCATGTTTCACAATATATAATAATTCAAGTGCATCAAA

>OsWAK46, 4556. t00017, Chromosome 4, pre-processing

OsWAKs-Supplemental Data 1[1].txt

ATGTCTCCCCACCGAGGAGCAGCTGTGGCTTCTATTTGCGCTGCGTTTTATGATAGTATT  
TGGCTATTGGTACTACTGCTGAGCACGGCGCTGGCTGCAGAGACACTCGACGGTGCGCAG  
GCAGCGTCGTCGCAATGCCAGAACGCCACCAAGTGCGGTGGTGTAGACATCGTCTACCCG  
TTCGGCCTCAGTTCAAGCGGCTGCGCTATGTCGCTTCTTTGAAGTCGACTGCAACAAC  
ACCGGGAATGGCGTCCAGAAGCCATTCTTGGATATGTCGAGCTCCTCAGCATCGATGTC  
CAGCTTAGTCAGGCCCCGCTGAGGACTCGTATATCTTCTTCTGCTATAACATCTCAACC  
CGAGAGATGAACCTTCGATGACCTGTGGTATGTGGACCTGAAGGACACGCCGTACAGGTTC  
TCGGACTCCGCCAACAAAGTTCACTATTATTGGGTGCCGAACACTGGCATACATCGCCGAT  
CAGGATGACGTGGGCAAGTACATGAGCGGCTGTGTCTCCGTCTGCCGGCGAGGTGAACTA  
ACGAGCCTGATCAATGGCACCTGTTCTGGGAAAGGCTGTTGTCAGACTGCCATCCCAAAG  
GGCCTCGATTACTACCAGGTGTGGTTTGAGCAAAGCATGAACACGTGGGGATCTATAAT  
CGAACCCCTGCAGCTACGCTGTGCTCATGGAAGCGTCCAACCTTCTCTTTTCAACCACC  
TACCTGACTTCACCGTTCGAGTTCAACAATACCTATGGCGGCGAGGCACCGGTGGTGCTT  
GATTGGGCTATCAACACCGCCAACACTTGTGAGGAAGCTATGGGAAATCTCACATCCTAT  
GCTTGCAAAAGCGACAATGCAAAGTGATCAACTCCTCCGATACAACAGGCTACATCTGT  
AGGTGCCAAGAAGGATACCAAGGCAATCCTTACCTTAAAGGTCCCAACGGTTGTCAAGGT  
AATTTTCCCTCTACTCCATATAGCCAGAATTTTGAATTGTGATTATACTCGATCGAGTA  
TTTCCTAACTAGTATGAAATACCTGTATCATGCAGTGAGCTGTGCATACGCAGCTTTCTT  
AAGTACGTTTCGTTCAACTTCTTTTCGTATTTGAGGGCATTAGACCTTTAATTTGGTTAT  
GCATATAATTAACAGTTTCCCTCTCACTACTTAAAAACCGATTTTTTATAACGTTGGCC  
TATAATTTTCGCTGGCGGCTATGGGCTATGACCACCAGCACAAATATGTAAGGAGGGGTC  
GTGGGTACGGGCGGCCAGCGAAAACATATCTTCGCTGGCGGCTGAGTAAAGCGGGCGCC  
CGTGAAGATATTTCTATTTTCACTGGCGGCGGACCTAAGGGACCACCAGCGAAGATGGAA  
AAAAGATGGAAGTCTTCACTGGCGGTGTGGTGATGTGGGCCGCCAGCGAAGATGAACCT  
ATTTTCGCTAGCGGCCCACTTAAAGCCACCACCTCCTATTATTTTCTATGGCGATGGCT  
TAAGTGGTCCGCCAGCGAAAATAGCTTCTCCTATATAAAGTCGAGCCCGAGCTGCCATGC  
CATTTGAGCACGATTTTCTCTCTTATAAACACAAACATAGGGGAGAAGGTTTTGAAGTCG  
AATGGTTTGATAGATCCATTGCGCCAAATGTTAGTTATACTTTCTGCTACTCTATTTCTC  
ACTTTTTATTTTCATTTTTATATGTTCTATGTTGAGAATTTAGCAAGGCATATGTACCATG  
GCCATGTTTGTTTTATTTTTTATGTGGAGCACAAAACGGTCAAACCTTTAAATAAATTTG  
ACTGAATTTGAATAAATTTACCAAATTCATTAACCTTTAAAAATTCAAAACTTCAGG  
CGAGATAGTTGCATACCTATTTCCGAAATTTCAAGCAAAATTTCAATCCCTGATCCTAAC  
ACTAACAGATACCCCAAACGTGCGCGTCGCTTTTAAAGGTCCATTGCCGGAGAAGACGTAT  
ATACATTTGTTGTCAACATTGCTGGTCTGAAACCACCGCCACCATTGGCTGTATTTTGC  
GTGGGAGAGAAGCGTGGTGATGATAGCGATCGAGAGTAGGAAGAAGCTAGACGACTCGAT  
GTCCGACGTGACAACACTTTGTTATTAGTCGACTGATGGTTTCGGAATTTTCAAGCTAAC  
TGATCAAAAGCAAGGCTATTTTTTTTTTAAAAATATTTCTAGTCTTTGTTTCATATTCTCA  
CTTTTTTCCATTTTATAGATTTTTTTTTTCCCGCGGACCGCTGTCCCCCCTACCTCC  
TCTCAAGATTGCCGGATTCATTTTTTTGTGTTTACAACATTATTAATCCATTCAATTTTATT  
ATTGTCTTTTTTTAAAAAAATTACCTATACAAATTCAGTTTGTAGATAATTGCTTTTTT  
TTTTTTTTTGCATATGGGTACTTGGGCAAGGGGATCATGGTGAGTGACCGTGAGAAAAAT  
GAACAAGGACTAAAAGCTAATCAGCTCATTATTGATTAGCTTTTGTACTAAAAGGAGCCT  
ATTTTTATAGATGCATGTAACGCTATATTTTTCTAAAAAACTTTTCATTTGATTGTAGAT  
ATTAATGAATGTCAACATGGAGAGAATTACCTTGGCTATGGAGATTGCTACAATAAACCT  
GGAAGTTTCGATTGTGTGTGTCATGCGGGTAGTAGTGGAATGCGGCAATTCAGGAGGA  
TGCCGAAAAGACCTCTTATCACCGAAAACACGACTGGCAATTGGTACACATTTATTCCAA  
CTCTATGTTACCTCATCTTGATCTGCTTGATCTCTGTTTTAAACATATCAGTTTCAAAAC  
ACTTTGCTAATCATGTATCTCTGTTTCCATAGGTGTTGTTGCCAGTGATTGGCTGTCTT  
CTTTGGATTCTAGGATGGGAAGTGATTGACACAAACAAAAAATTAACGACAGGCTCT  
ATTAAGACAGACTGATGAGTTTTTTCAACAACATGGAGGCCAGATATTGCTAGAAATGAT  
GAAAGCAGATGGAATGATGGGTTACCCTCTACAAGAGAGGGGAGATAGAGACTGCCAC  
AAATAATTTAGCAAGGCACATGTCAATTGGGGAAGGAGGGCAGGGAACAGTTTATAAGGC  
TGTTATAGATGGAGTTGCCGTGCAATAAAGAAGTGCAAGGAGATTGACGAGAGCAGGAA  
GATGGAGTTTGTGCAAGAGCTGGTCATACTTTGTCGTGTTAGCCATCCCAACATTGTCAA  
GTTGCTTGGCTGTTGGCTCCAATTTGAGGCACCGATGCTTGTGTATGAGTTTGTACAGAA  
CAAAACACTGCAAGACTCTAGATCTTCAGAGGAGTAGGCGGTTCCATGTCACACTGGG  
AACCCGCCTAAGGATTGCTGCTGAATCCGACGACGCACTTTCACATCTCCACTCTTTGCC  
ACACCCAATACTCCATGGTGATGTGAAGACAGCCAACATCCTTCTCGAAATGGCTTGGT  
TGCAAAGGTGTCTGATTTTGGATGTTGACGATTGATAAGAGAAGTCAAGGCTGTACCCAA  
AGGCACACCAGGTATATTGACCCGGACTATCTAGTTGAGTACCAACTCACAACCAGAAA  
TGAATGTGATAGCTTCGGAGTCATTCTTCTTGGCTTCTAACCGGTAGGAGGCCACTGTC  
AAAAGAGAAGAAAAGCTTAAACATGATGTTTCAAGGAGGCTAGGTCCAATGGCACACTCAT  
TGAGCTCCTTGACAGTGACATTGTTGATGAAACGAGCATGAGAGTGATCAAGCGGGCTGC

OsWAKs-Supplemental Data 1[1].txt

AGATCTAGTGAGTCAATGCTTGGTTGTTCCGGGTACGACAAGGCCATCAATGACACTAGT  
GGCAGCGGAGCTCCGCCGATTAGCGGAAGCAGATGAAGTGAAGCGAAGCCCACAGCCACC  
ATTGGTGTCTGAGGATCTGAGATTTATGGATATGGCAGTACAACGAACACTTTGTATGG  
AGAGAGCAGGACGAGTGGGGCTTATAGCTTGGAGAAGAAAGCTGTGTTGAGTATAGAGTT  
TGCGAGATGA

>OsWAK46 gi|32982650|dbj|AK072627.1| Oryza sativa (japonica cultivar-group) cDNA  
clone: J023126M10, full insert sequence

GGAGGTTGCAAAAGTAGTGTGCTCGATATATCCACCAAAAGCACACAGATATTCGCTTATCCATGTCTCC  
CCACCGAGGAGCAGCTGTGGCTTCTATTTGCGCTGCGTTTTATGATAGTATTTGGCTATTGGTACTACTG  
CTGAGCACGGCGCTGGCTGCAGAGACACTCGACGGTGCGCAGGCAGCGTCGTCGCAATGCCAGAACGCCA  
CCAAGTGCAGTGGTGTAGACATCGTCTACCCGTTCCGGCTCAGTTCAAGCGGCTGCGCTATGTCGCCTTC  
CTTTGAAGTCGACTGCAACAACACCGGGAATGGCGTCCAGAAGCCATTCTTGGATATGTCGAGCTCCTC  
AGCATCGATGTCCAGCTTAGTCAGGCCCCGCTGAGGACTCGTATATCTTCTTCTGCTATAACATCTCAA  
CCCGAGAGATGAACCTTCGATGACCTGTGGTATGTGGACCTGAAGGACACGCCGTACAGGTTCTCGGACTC  
CGCCAACAAGTTCACTATTATTGGGTGCCGAACACTGGCATAACATCGCCGATCAGGATGACGTGGGCAAG  
TACATGAGCGGCTGTGTCTCCGTCTGCCGGCGAGGTGAACAAACGAGCCTGATCAATGGCACCTGTTCTG  
GGAAAGGCTGTTGTCAGACTGCCATCCCAAAGGGCCTCGATTACTACCAGGTGTGGTTTGAGCAAAGCAT  
GAACACGTCGGGGATCTATAATCGAACCCCTGCAGCTACGCTGTGCTCATGGAAGCGTCCAACCTTCTCC  
TTTTCAACCACTACCTGACTTACCGTTCCAGTTCAACAATACCTATGGCGGCGAGGCACCGGTGGTGC  
TTGATTGGGCTATCAACACCGCCAACACTTGTGAGGAAGCTATGGGAAATCTCACATCCTATGCTTGCAA  
AAGCGACAATGCAAAGTGTATCAACTCCTCCGATACAACAGGCTACATCTGTAGGTGCCAAGAAGGATAC  
CAAGGCAATCCTTACCTTAAAGGTCCCAACGGTTGTCAAGATATTAATGAATGTCAACATGGAGAGAATT  
ACCCTTGCTATGGAGATTGCTACAATAAACCTGGAAGTTTCGATTGTGTGTGTCATGCGGGTAGTAGTGG  
AAATGCGGCAATCAAGGAGGATGCCGAAAAGACCTCTTATCACCGAAAACACGACTGGCAATTGGTGT  
GTTGCCAGTGTATTGGCTGTCTCTTTGGATTCTAGGATGGGAAGTGATTGACACAAACAAAAAATTA  
AACGACAGGCTCTATTAAGACAGACTGATGATGTTTTTTCAACAACATGGAGGCCAGATATTGCTAGAAAT  
GATGAAAGCAGATGGAATGATGGGTTCACCCTCTACAAGAGAGGGGAGATAGAGACTGCCACAAATAAT  
TTCAGCAAGGCACATGTCATTGGGAAGGAGGGCAGGGAACAGTTTATAAGGCTGTTATAGATGGAGTTG  
CCGTGCGAATAAAGAAGTGCAAGGAGATTGACGAGAGCAGGAAGATGGAGTTTGTGCAAGAGCTGGTCAT  
ACTTTGTCGTGTTAGCCATCCCAACATTGTCAAGTTGCTTGGCTGTTGCCTCCAATTTGAGGCACCGATG  
CTTGTGTATGAGTTTGTACAGAACAAACACTGCAAGAGCTGCTAGATCTTCAGAGGAGTAGGCGGTTCC  
ATGTCACACTGGGAACCCGCTAAGGATTGCTGCTGAATCCGACAGCAGCACTTTCACATCTCCACTTTT  
GCCACACCCAATACTCCATGGTGTGTGAAGACAGCCAACATCCTTCTCGCAAATGGCTTGGTTGCAAAG  
GTGTCTGATTTTGGATGTTTCGACGATTGATAAGAGAAGTCAAGGCTGTACCCAAAGGCACACCAGGGTATA  
TTGACCCGGACTATCTAGTTGAGTACCAACTCACAACCAGAAATGATGTGTATAGCTTCGGAGTCATTCT  
TCTTGAGCTTCTAACCGGTAGGAGGCCACTGTCAAAAGAAAGAAAAAGCTTAACACTGATGTTTCAGGAG  
GCTAGGTCCAATGGCACACTATTGAGCTCCTTGACAGTGACATTGTTGATGAAACGAGCATGAGAGTGA  
TCAAGCGGGCTGCAGACTAGTGAGTCAATGCTTGGTTGTTCCGGGTACGACAAGGCCATCAATGACACT  
AGTGGCAGCGGAGCTCCGCCGATTAGCGGAAGCATATGAAGTGAAGCGAAGCCACAGCCACCATTGGTG  
CTCGAGGATCTGAGATTTATGGATATGGGCAGTACAACGAACACTTTGTATGGAGAGAGCAGGACGAGTG  
GGGCTTATAGCTTGGAGAAGAAAGCTGTGTTGAGTATAGAGTTTGCAGAGATGATCGATGTATTACTTGT  
ATATTGATTCCTTGTGTCGTTTTCTAGTGCGTGTGGATTTAGTGTCTTCTCACTTTGGGGGTGGAG  
GATCTGGTTTGTGTTTTTTTTTGTGTTTTGACTTGAGGATCTGGTTTGTGTTGTGATAGTGAACATT  
TGTTGTGTGGATGTGGAGTACAAGTACAAGAACCTGTAAACATTATAGCATTAAAGTGTATTCTATAACT  
AATGATTAGTAGAATTGTAATCTAACAAAACATAACAGTACTTCTTTTATTGTTGTTGC

>OsWAK47 9632.t02847, Chromosome 4, pre-processing  
ATGCCATTCCACATGCTAGCTTCACTACTATGGCTCTGCGGAGGGATCGCGGCATATTGC  
TCGGCCGCTCTGCAGCCACCTGCGTGAGAAGCTGCGGCGGGTAGAGATCCCTTACCCG  
TTCGGCCTGGATCCTGCCTGCGCCCTGCCCGCTTCAACCTCACCTGCAACATCAAAGGA  
GATGGCAAGCCGATTACAAAGACGTGGAGCTGCTTAACATCTCGCTGACAGAAGGTCAG  
GTACGAATGAGGATGCACATAGCTAACTATTGCTACAATAGTACTTCTGGCGGGATGAAC  
GGTACGGGCTGGTCGCTAACTTAAACGGGCACACCATTAGATTATCCGACTTCGGCAAC  
AAGTTACGGCCATCGGGTGTCAACGCTCGCTTACCTCTTAGCAGACGATGTGTTAACA  
ACGGGTGTGTGGCCACCTGCAAGGCAGACGACCTCTTGAGGCTCCAGACGGTGTCTGC  
TCCGGGATAGGTTGCTGCCAGACAGCCATCCCCAAGGGGCTACAGTACTATGGGGTCATG  
TTTGAATCGGGCTTCAACACGACGGAGATCAACAACATGAGCCGTTGCAGCTATGCGGCA  
CTCATGGAGGCATCCAGCTTCAACTTCTCTAAGAAGTACCCTACTTCTTCATCGTTCAAT  
GATCATTACCGTGGGCGAGCGCCGCTGCTTGTGGATTGGGCCATCGGAAATGAGACCTGT  
GATGTAGCAGCTGATTACACGTGCATCAGCAAAAATAGTGGGTGTGTGGACTCGCTCAA  
TGGACAGGCTATAGATGCACTGCTCCCAAGGATTTTATGGAAATCCTTACCTGAAACC  
AGAAGATCCCGACAGCTGCCAAGGTGAAGTTAAATACAATCCCATCCTTTAATTAAGGCA

OsWAKs-Supplemental Data 1[1].txt

TTATTATTGAGCAAGTTAAATGGAATAAAAAACACGTAAGGTTATGGCTAGTTAATGT  
GAATTCATACGTACGTTCTTAAAGTAGTACGCATAGGATGGACCTGCTTGTAAAGTTCTA  
GCTAACTATAAATATTTTCTAACCTAGCTAATTTTAGAGTTAATTTAGGATGGACGTTTCG  
TAAATTAATTCATTTTACATCAACTTTCTGTAATGTGTAAAAATCATCCATCAACTTT  
TAGATTGAGCCTGTAAATCCCTCAACCAAACTCGGACGATTTTAACTTAGGTGCCACTT  
ATATATGGTATTACAATCAGCAAAGAAAATTTTGGATTGTTTCATTCCTTTTCTTCCTCT  
CTTGCCCTTCCCCCTCTCTCAGCTGTAAGTCTAAACCTTCTCAAGCCCTAAGCAATT  
GCTGCCAACCAGTGTTCGAATTAATGCAAGTACAATCCAGGGCTCCTGCTGGCAACTTA  
CAATTTTTGCGTTAATTTCCCGGATTTTACTCAGATCCCCGTGTCCTAACACGCCCATC  
TGTTAACGTAGGTGCCTGCACCTCTGCCTCTAGCGTAAGCATCGCTAGGGTCCCTTGAG  
CCTCCTTGCCGTTTCATGTGAGTGGTGTAAATTAATTTGTTTATTAGAAAGTTGAATGAT  
GAATAATAATGTATAGCGCTAAAGTTTAGAGATAATTTTAGATGTTGCGAAAGTCTTGC  
TTTTGTATTGCTTAGAGTCATACCTTAAATTATTTCCATTGCATCTGCCATGTGCCTTTA  
ACTTATAAGGTGCAGTATAAGAATATTTTCTAGAAAATATTTTGATTTCTAAATCATAG  
ATTTTGTAAATCTTTAAAAAACATTTTATAGGAAGTCCATTTGGATACACATTCACATGT  
ACACACTATATACTCATGATTTGAATTGCTCTGTTTTCTAACAAAGCAACGCTAAATTCC  
GTTTCTTAATACCGCTGGTATTCTGTTGCAGATATTGATGAGTGAAGGAACCATATAAG  
TACCCCTGCCATGGAATGCAGAAATAAAGTTGGAGGTTATGATTGTACTTGTCCGTTT  
GGTACACGAGGCAATGCCTACAATGGACCATGCGACAAAGGGCTAGCTATCGGTATACAC  
AAAATTTTCAACCTTGCCTGATTGCTATATTGCAATAAATTATGAATTTTCATGTTTTGCA  
TTGATTCATTTGAACAATTTCCCTGTACATATATTTGGCTTAAGCATTTTACCTTCTC  
CTCGCTAGGAATTTGTGCCTCTCTTGTGGTTGCTCTAACGACTTTACTTGGGATAGAATG  
GATCAAGTACAAACAACGAATCAAAGGCAAGACATCATGAGGAAGAGGGGCGAGTATTT  
TCATCTACACGGAGGCCAATTGTTAACAGATATGATGAACATAGAGAACAACATTTTCATT  
TAAGCTGTATGACCGAGATGACATTGAGTTGGCCACCAAAGGCTTTGACAAGACATCAAT  
CATTGGTGAAGGAGGTGAGGTTACTGTTTTAAAGGGTATAATCTTGATCAAGTGAACAA  
CCCTGTTGCGATCAAAAAGTGCAAGGGATTTGATGAGAATAGTAGGACAGAATTTACACA  
GGAGCTGCTCATACTTTCTCGAGTCAACCATGAAAACATCGTCAAGCTTCTTGTTGTTG  
TCTGCAATTTGAAGTTCCAGTTCTTGTGTACGAATTTGTCCCAATAAGACTTTGCACTA  
TCTAATCCACAGCCAAAATGATCCATCCATCAGAACACTGGAGATCCGCCTAAAAGTTGC  
TGCCGAATCTGCTGAAGCATTTTCATATCTACACTCACTGGACCACCCTATCTTACATGG  
GGATGTCAAGTCGATGAACATACTGCTTAGTAACAATTTTATTGCAAAGATTTCTGATTT  
TGGGTGCTCCAAAATTAGGGCAGCTGATGGACACGATGACGTGGTGAAAGGTACGATTGG  
CTATCTAGATCCAGAGTACCTGCTGAAGTTGAGCTCACTGACAAGAGTGACGTGTACAG  
CTTTGGTGTGCTTCTTCTGAGCTTTTAAACACGCCGTACACCATTATCTAAGCAGAAGGT  
CAGCCTCGCATCAGTATTTCAAGAGGCCATGAAGGAAGGCCCTGTTTCTTGAGCTCATAGA  
CACAGAAATATTACATGAGGATAACATGGGATTGATTGGTGATCTAGCAAGGCTGGCATG  
CCAGTGTTTAGCAATGACTAGTGAGAGCAGACCAACAATGTGCAGGATTGCAGAGGAATT  
GCGACGAATAGAAAAACGAGTACGACAACACCGTGGGGTACTTACAACATATTAGTTCAAT  
GTCATTGTTAGCAAGTTTCATCTGCAGACACATCATTGCATTTACAGGTGAAACCAATGG  
CTACAACAGCCTTAGGAGCGTGGCTGCAATGAGCATAGAATTTGCTAGATGA

>OsWAK47 9632. t02847, Chromosome 4, post-processing  
ATGCCATTCCACATGTCTAGCTTCACTACTATGGCTCTGCGGAGGGATCGCGGCATATTGC  
TCGGCCGCTCTGCAGCCACCTGCGTGAGAAGCTGCGGCGGGGTAGAGATCCCTTACCCG  
TTCGGCCTGGATCCTGCCTGCGCCCTGCCCGCTTCAACCTCACCTGCAACATCAAAGGA  
GATGGCAAGCCGATTACAAAGACGTGGAGCTGCTTAACATCTCGCTGACAGAAGGTGAG  
GTACGAATGAGGATGCACATAGCTAACTATTGCTACAATAGTACTTCTGGCGGGATGAAC  
GGTACGGGCTGGTGCCTAACTTAACGGGCACACCATTTAGATTATCCGACTTCGGCAAC  
AAGTTACGGCCATCGGGTGTGCAACGCTCGCTTACCTCTTAGCAGACGATGTGTTAACA  
ACCGGGTGTGTGGCCACATGCAAGGCAGACGACCTCTTGAGGCTCCCAGACGGTGTCTGC  
TCCGGGATAGGTTGCTGCCAGACAGCCATCCCCAAGGGGCTACAGTACTATGGGGTCATG  
TTTGACTCGGGCTTCAACACGACGGAGATCAACAACATGAGCCGTTGCAGCTATGCGGCA  
CTCATGGAGGCATCCAGCTTCAACTTCTCTAAGAACTACCCTACTTCTTCATCGTTCAAT  
GATCATTACCGTGGGCGAGCGCCGCTGCTTGTGGATTGGGCCATCGGAAATGAGACCTGT  
GATGTAGCAGCTATAGATGCAACTGCTCCCAAGGATTTTCATGGAAATCCTTACCTGAAA  
CCAGAAGATCCCGACAGCTGCCAAGATATTGATGAGTGCAAGGAACCATATAAGTACCCC  
TGCCATGGAATGCAGAAATAAAGTTGGAGGAATTTGTGCCTCTCTTGTGGTTGCTCTA  
ACGACTTTACTTGGGATAGAATGGATCAAGTACAAACAACGAATCAAAGGCAAGACATC  
ATGAGGAAGAGGGGCGAGTATTTTCATCTACACGGAGGCCAATTGTTAACAGATATGATG  
AACATAGAGAACAACATTTCAATTAAGCTGTATGACCGAGATGACATTGAGTTGGCCACC  
AAAGGCTTTGACAAGACATCATTGGTGAAGGAGGTGAGGTTACTGTTTTTAAAGGG  
TATAATCTTGATCAAGTGAACAACCCTGTTGCGATCAAAAAGTGCAAGGGATTTGATGAG

OsWAKs-Supplemental Data 1[1].txt

AATAGTAGGACAGAATTTACACAGGAGCTGCTCATACTTTCTCGAGTCAACCATGAAAAC  
ATCGTCAAGCTTCTTGGTTGTTGTCTGCAATTTGAAGTTCAGTTCTTGTGTACGAATTT  
GTCCCAATAAGACTTTTGCACTATCTAATCCACAGCCAAAATGATCCATCCATCAGAACA  
CTGGAGATCCGCCTAAAAGTTGCTGCCGAATCTGCTGAAGCATTTTCATATCTACACTCA  
CTGGACCACCCTATCTTACATGGGGATGTCAAGTCGATGAACATACTGCTTAGTAACAAT  
TTTATTGCAAAGATTTCTGATTTTGGGTGCTCCAAAATTAGGGCAGCTGATGGACACGAT  
GACGTGGTGAAGGTACGATTGGCTATCTAGATCCAGAGTACCTGCTGAAGTTCGAGCTC  
ACTGACAAGAGTGACGTGTACAGCTTTGGTGTCTTTCTTCTTGAAGCTTTTAAACAGCCGT  
ACACCATTATCTAAGCAGAAGGTGAGCCTCGCATCAGTATTTCAAGAGGCCATGAAGGAA  
GGCCTGTTTCTTGAAGCTCATAGACACAGAAATATTACATGAGGATAACATGGGATTGATT  
GGTGATCTAGCAAGGCTGGCATGCCAGTGTGTTAGCAATGACTAGTGAGAGCAGACCAACA  
ATGTGCAGGATTGCAGAGGAATTGCGACGAATAGAAAAACGAGTACGACAACACCGTGGG  
GTACTTACAACATATTAGTTCAATGTCATTGTTAGCAAGTTCATCTGCAGACACATCATTG  
CATTTACAGGTGAAACCAATGGCTACAACAGCCTTAGGAGCGTGGCTGCAATGAGCATA  
GAATTTGCTAGATGA

>OsWAK48 9632.t02849, Chromosome 4, pre-processing  
ATGCTATGGCTCGCCATAGCGTTTCGCTTTTGGAGCTCGGCCTCATCACCGGCGGTGCA  
GTGGCGGAATGCCCGGACACCAAGTGCGGCAGCGTGGACATCCCTTACCCATTACGATC  
GGCCAGGCGCTGCGCCATGCCTGGATTTGAGCTAGCCTGCAAGAACTCCAGGCGGTTT  
CTCGGAGATTTGAGGTCGTCAACATCTCCCTTCAGCTCAGTCAGCTCCGGGTGCTGAAT  
AAGATATCTTCTTCTGCTACAATCCTGCATCTAAGTTGATGGAACCAAATACATTTTCA  
AGTGACTTGGACACTCCGTTTCATGTTGTCCGACACCGGCAACAAGTTCACCGTCATCGGG  
TGCCGAACACTGGCATATATTGCCGATAAGGACAACGTGGGCAAGCTCATGAGCGGGTGC  
GTGTCCGCTGCCGGCGAGGTGACGTGACGAGCGCCACCAACGGTACCTGCTCTGGGGTA  
GGCTGCTGCCAGACAACCATCCCCAAGGGCCTCCCTTATTACCAGTCTTCTTCGACCAA  
GCCTTCAACACGTGCGACTCGATCTACAACGCCACCCCTATGCAGTTACGCTGTGCTCATG  
GATTCGTCCGACTTCAAGTTCTCAACAAGCTACTTGACTTCGCCGGAGTTTAAACCTCC  
TACGGCGGCGGGCGCCAATGCTACTGGATTGGGCTATCCGAAGTGTGAACAACGTGAC  
GAAGCACAAAAAATCTCACGTTATACGCGTGTAAAAGTGACAAGAGCGAGTGCTTCAAT  
TCCTCCAATGGACCAGGCTATATATGCAATTGCACAAACGGGTACCAAGGAAATCCTTAT  
CGACAGGATGGTTGCCAAGGTAATATCCTTCTAATCTCATCATAGCTAGAATTTTAAAA  
TTACGATTACCTTAAGTCTTCTTGAAGCTACTAGTGAGTAGATTTATAATGCAAGTGA  
TGATTGATCGACAATACATTAATTTGTTTGGGCTTTAAAGTACTTTCTCCATCTTGTACT  
TTATAAATATGCAATAACCTTTTTCCATAATGCCACTGCACTAGTCTTGCTAGTAATGTA  
TATATACTACACCATCCGTTTCATATTATAAGTCGCTTTGACTTTGGTCAAAGATAAACT  
TCTCCAAGTTTAACTAGTTTGTACAAAAAGTAATTAATAACATTTCCCAACACAAGACAA  
ATATAATTATAAAAAATATTTAATTTAGTTTAAATGAATAATTTGGTGTGAGTTATT  
TATAAACTTAGTTAAACTTAGAATAGTTTGACGAGGTGGGCACCAACCGCTGCACGTCCT  
CATCAGCGCCAAGTAGGAGGACGAGGTGGGCACCGATGCGAGGCGCTTGACGCGGGCCAC  
ATCATCGCGGGCGGAGTAGCAGCCGCGCGTGTCTGGTACAAGTCCGACAATGTTGCGC  
CGTCGCGCGCGGAGAAATCCATCGCCGCGGTGGTGGGACTTGTGCGGTGAGCTCGAAATT  
GGGAAGGGGAGATCTGACATGTGGGCCGAGGATCTGACATGTGCACCGGATAAAGAGGGT  
ATTGGGATCCGTTGGTACGAGGATCGACGTAGTATGACATCAAGCAAACAGAAGATAAGG  
GTGTCTGTGACGCGGGGATACCCGTAGACCGGATAAAGAGGGTATTGGGATCCGTTGGTA  
CGAGGATCGATGTAGTATGACATCAAGCAAACAGAAGATAAGGGTGTCTGTGACGCGGGG  
ATACCCGTAGACCGGATAAAAAGGTATTGGGATCCGTTGGTACGAGGATCGACGTAGTAC  
GACATCAAGCAAATAGAAGATAAGGATTATACTGGTTCAGGCCCTTGGTAGGTAATAGC  
CATAATCCAATTGGTATGGAATTATATGATGGAACCACAGATTACAAAGAGAATAGCAG  
AACTCGATGATATCGACGAGATCATAGTTCAAGTTGGTCCGACTAGATCTCCCGCGACTT  
GGCTCCTGCACGCTCCGACTCCGTAGGCTGTGGTGGGTGTGTTGGCGGTAATATTCGATG  
CCTTCGGTCTGCCAGGGTCCCTTATATACCGCGGGTCAGTTGATCTCCAAGTAGGAC  
TCGAAGATATCGGACCCCTCACGATATGGTGACCCAGTCTTGTCCGAGTAGAACTCCTTT  
CATCTGTAGATACCATCCCTATCACGTGATAGATTTCTTAAATATATACGGAACCTATCC  
GTACACGCGCGGGTATACCGTATCAGTATACAACGTACATCCAAGGATAGAGGGTATATC  
TTATTCGTAACCTGATAGTCTTACAGCTAAATCCATGAAGTCACGGCGTCTATAGT  
AAAATTTGCCTTAGTAAAAATAGATTTTCTGAAGCAGTTCTCAATGAGCCGACATAAAAA  
ATAAATTTACGCTACATAAAAGACATGGTCTCTCTCCCAATTGTATATGTCTTATCCTC  
AGCCTCTCATCCCTCTCCTCTCTCACTCCCTCTCGATCCCTCTCCCTCCTTTCTCCTT  
TCCTAACTCAGGGCAGCGCCGGGCGGGCAGATCCTGGCAGGACTAAGTGACCTTAACCAT  
ATCTTTTCTCTCAGGGCTCACGCGAACGGACAGCGACTACGGGTGGTGGGTTGCGACGG  
GCCACCGCGCGGCGGATTTCAAGCACGAACCAAAATGGCCAGGTTGCGCAGGCCTCTGGT  
GGCGGATCTCGATAGTGGGTTACTGACAGCGGATCTCGAGCATGGGGCCACAGATGCGCG

OsWAKs-Supplemental Data 1[1].txt

GGGTTGCGCGGGGCACCGGCGGCAGATCTCCAGTGCACATTGTGGGAGGTGGGGTTGTGT  
GGGCCACCATCGATGGGAACTCGAGCGTGGGTTGTGGGTGCCGGGGTCAAACAGGCCACT  
GGTGGCAGGAGGTGAGTGCAGGTTGCGAGCGGTGGATTCCGTGGAGTTATTTTTGGGAA  
TTTTTTATTTTTCTAGAAAATCATTTTCGTTGGTGGTTGGCTTAATGTTGCCGCTGC  
AAAAGTCAATTTTTTTTACGGTCCACTTAACCTTGCTGCCAGTAAAAATAGATTTTTTA  
TCGCAGATGAAGCCCGCATATGCAGATAGTGATTTTTCTCTGGCCTTTGGTCGTAGGTGG  
TTTAGTCTAGCCGTCATCCAAGATTGATTTTGGTCATCAGAAAAAAAACCTATTGTTTA  
GTAGTGTTAAGCTGACTACGGTGTTAGTTTCTAAATTTTGTGGTCTCATTCTGATTTGCC  
CCCTAATTAACCGCGAATTGTATGGTTTCGCTATACTCTTCAGTCCTTATCTTCAATATA  
ACACCAGCAATTTACCATGGGACTTTTTTTAAGGGGCAATTGCGCATTGACCCTCTTTT  
GAAAGCTAACTATCAATTTGACCCTTTTTTATCAACTTTGCTTATTTGGCCCTTCTTATC  
AAATCCGAAGATATGGTATGCCCTATTCTGTTAAGGGCATCTAATGACGTTAACTGAAGC  
ACAAAATGTTCTTCTTCCCTTAATCATTTGACCCTATTATATGTGGGACCCACCCATCA  
ATTCTCTCTTCTCGTCTTCTCCTCTTTTCTCTTTTCTCTCTTCTCCTCTCCTCCACAGCT  
CCACTCGCAGGGAGAAGGCGGCGAGCGTCTAGAGGGTGAGCCGGCACCGGCCAGCAGCTG  
TGGAAAACCGCCCTGTCGTCGCCCCCTCCCTCCCCGGATCTAGCCGTCACAGCTCCATCGG  
CGGGCTTGCCGCTTCCCTTCTTCTGTCATGCCGGCGGTGCCTCCTCTTCTGCTGGCGC  
CGCGGCTCCTCCCTCCTTCCGCATGCCTATCGCCACCGCCGTCTTTTCCCTCTTCCAC  
ATGCCTGCGCCGGCGCCGATGCTGCCTCCTTCCGTCTCCTGCGCCGGCGGCGCCGCTT  
CTTCCCTCCAGCAGGCTCCCTTCCCTACCTTCTCCGACGCCGACGCCGCTCACCAGC  
TGTGCGCGCAGCTTACCACGCGCCGCGCTGCCACCGCCGTGAAGAGGCTCGGCGCTG  
CTGCTCCCTTCTTCTGTCATCTGACGCAGGCACGGAACCTCCGTCCGTTTCTCACCGCC  
GCCGTTCTTCCCTTCACTAGCGTGCGCCGGCCTGGATCGCCTCCACACGCTTCCCGCCG  
CCGCCACCCCTGCGTCCACAAGCGGGCACCGGTGCGGATCCCTTCCGCGCGCTTCTGCC  
GGCACCATCCCCTTCCCTTAAAGACACCAAGCGCCGGTGCCGCAACTCGCCAGCAGGA  
GAGAGAGAGATACATATGTGGATAGGGTTTGGGATGGATATGGTTTCTGAAGGATATT  
TGGCATTATGAAATTTAATTATAATTATTTTCTTCTTTTAAACCAAATCTTAATGGTGTA  
GTGGAACAGGGTTAGACGGAAGAGGGTCTAACAGGGTAAAAACAGGGTTAGATGGAAGA  
CGGAACAGGGTAAAAACAGGGTCCGCATGCAAAAGTCGATTTTTCGAAGAGGGCTTTTA  
AGGTGTCGTATGTGGAATGGAGGTGATTTTTTTCAGACGCGGGCATTATGGTCCCGTC  
TGCAATACAACGAGTGTCTCGTCTAGAAAAATCGTTTCTGTAGTAGCGCTTGTGCACTCG  
CGGTGCACTTTAATATAATAGAATTTCCGTGCGGTTAGACATTTACAGGTATTCTTGGTC  
CATTTAAGCATGTATTATGGGGCACATTTGTTGCGTTACAGTATAATCATGAAAAATAAA  
CAGTCACGAATTGCATTACGTACACAAAAATTCATTCTTTGTTGTGCTGGTTTTCTT  
TTCTTTTTCCATGCATGTGGACAGGCGGCGCCACAACATTTTTTTCGACTCACCATCTGAC  
TTTGATGATGATTCACATAAAAAACATATGCGGAGAAACAATCAAGGTCAAAACTAAATAA  
ACCTAACATAGTACTGTGGAATAATCTAACTGTTGTATTCTGATGTTTTCTGATCTATT  
ACATGACCCCTCATAGGGTATATATAGGAGTACATAGGGGATAGAGACTTGGAGTACA  
ATACAAGTAAGAGTAGATTTATCTCTAGGATTCTATCTCTAGGACTCTATCTTATCTCTT  
GGATTCTATCTCTAGGATATATCTTATCTCTATAATTTGATTTGACTCTTATCTCTAAC  
TAACATATTATACTTCTAACATTTCCCTCAGTCGTAACGGGAGCGAAGCGAACGATTGC  
GACTGGATTTAAATCTTCTATTTCTTCATCTTTTTCTCCATCTTTTTCGACTCACTATC  
ATCGATTGCATCTCTGATGGACGGTCTCCACCTGGTGCCTGCGTCCCTTCTGTGTCGT  
CCCTTGACTCTCCTCTATTTCCCTCCCGAGTCATAGCGGGAGTGTGATGGACGATAGCGA  
TGACACGGACGCTTGGACTGGAGTTTCTGTAGATGATTCTTGTGTAGACATTCTGTCGAT  
ATAGCCGATCATGTAGTAGCCGTGGTTGTGCGGTGTAGCCGCATATAGCCGAAGGCGAAAA  
AAAAAATTACACCATGGTGTGAAGACGAACTGCAATTGTTAGCATCTTGACCTTGTAG  
ATGTCAGATGATGCCATTAGAGACGTCTTGATATGTCAGAGGACGTCGTTGGCGATGAG  
GCCACCATTTTGGTTGTTCTTTTGTGCCGTGTAGTGGTCACCATAATAGTGATGCCGAG  
TTGATGCAGTTGTTGTCGTGTAGATGACGTGATCGATGCCGTGTTGGTGACGCGGTG  
TTGCCGTGTCAGAGGATGCGGTGCGATGTCGTGATGAAGCGTCTTGACAGATTAATCTATC  
AGAGGACGCGAGGTGTCCATCTATGTGGACGAGTCGGCAGCGGCAAGTTGATGAAGACCA  
CTGATGATGTAGAATCGGCGAAGACGATCGTCTGGAGAGCTCGGCGGCTTGA

>OsWAK48 9632. t02849, Chromosome 4, post-processing  
ATGCTATGGCTCGCCATAGCGTTGCTTCTTTGGAGCTCGGCCTCATCACCGGCGGTGCA  
GTGGCGGAATGCCCGGACACCAAGTGCGGCAGCGTGGACATCCCTTACCCATTTCAGCATC  
GGCCCAGGCCGCTGCGCCATGCCTGGATTTGAGCTAGCCTGCAAGAACTCCAGGCCGTTT  
CTCGGAGATTTGAGGTCGTCAACATCTCCCTTCAGCTCAGTCAGTCCGGGTGCTGAAT  
AAGATATCTTCTTCTGCTACAATCCTGCATCTAAGTTGATGGAACCAAATACATTTTCAG  
AGTGACTTTGGACACTCCGTTTCATGTTGTCCGACACCGGCAACAAGTTACCGTCATCGGG  
TGCCGAACACTGGCATATATTGCGATAAGGACAACGTGGGCAAGCTCATGAGCGGGTGC  
GTGTCCGCTGCCGGCGAGGTGACGTGACGAGCGCCACCAACGGTACCTGCTCTGGGGTA



OsWAKs-Supplemental Data 1[1].txt

GGCTGCTGCCAGACAACCATCCCCAAGGGCCTCCCTTATTACCAGGTCTTCTTCGACCAA  
GCCTTCAACACGTCCGACTCGATCTACAACGCCACCCTATGCAGTTACGCTGTGCTCATG  
GATTCTGTCGCACTTCAAGTTCTCAACAAGCTACTTGACTTCGCCGGAGTTTAACACCTCC  
TACGGCGGCCGGGCGCCAATGCTACTGGATTGGGCTATCCGAAGTGTGAACAAGTGTGAC  
GAAGCACAAAAAATCTCACGTTATACGCGTGTAAAAGTGACAAGAGCGAGTGCTTCAAT  
TCCTCCAATGGACCAGGCTATATATGCAATTGCACAAACGGGTACCAAGGAAATCCTTAT  
CGACAGGATGGTTGCCAAGTGGAAACAGGGTTAGACGGAAGAGGGTCTAACAGGGTAAAA  
ACAGGGTTAGATGGAAGACGGAACAGGGCGGCGCCACAACATTTTTTCGACTCACCATCT  
GACTTTTGATGATGATTACACATAAAAAACATATGCGGAGAAAACAATCAAGGAGTACATAGGG  
GATAGAGACTTGGAGTACAATACAAATGACGTGATCGATGCCGTCGTTGGTGACGCGGTC  
GTTGCCGTCGTAGAGGATGCGGTGATGTCGTGATGAAGCGTCTTGAGATTAATCTAT  
CAGAGGACGCGAGGTGTCCATCTATGTGGACGAGTCGGCAGCGGCAAGTTGATGAAGACC  
ACTGATGATGTAGAATCGGCGAAGACGATCGTCCTGGAGAGCTCGGCGGCTTGA

>OsWAK49, 5443. t00017, Chromosome 4, pre-processing  
ATGCTCACCAAGGGCGGCGACGGCGAGACTGCAACGGGGAAGCCGGCGGGCTCCTCG  
GGGAGGCAACGGTGGTCCGGTGGCGTACCACGGCGGAGGCGGCGGACGGTGACCGGGAC  
GACCGGGGCGCGGAGAGGGCGATTTCAAGTGGTCCCGGAGGCGAGGAAGCGGTGGCCGGG  
GTGTGGCTCGGAGTTGCCGATCCGAGGGAGGAAACGGCGCAGTCCGGCGTCGACCGGGGA  
GGCGGGGCGACACAGATGGAGACGGCAACACGGCGGCGATCTCGGTTGGTGGTGAAGT  
TGGTGTCTCGGGCAGCGAGGCGCGACAACCGAGCGGCGGCGGAGCTTGACTTTGAGGCGGC  
GAAGGTAAGTGGCAGTGGTGGCGCATTGGGGCGACGGCTAGGGCGGCGGTGGCGCGCGGCT  
GGAGGCGGTGAAAGGGGCGGCGGCTCGGGTGTACAGTGGGAGTGGTGTTCGAGGGGTGG  
AGAGGGGGAAATAAGAGGCGGCGGAGCTTCCCTTTCGCGTGGCGAAGCTGGCGGTGGCGG  
CGGCTCGGCGCGGCGACGGCTGTGGCGGCGGGAACGGCGACCGGAGTTCGCCGGAGAGC  
GGCGGTGCGTTGGCTCGGCGCGGGGAGAGCGAGGGAGGGCGGCGGCTTGGGAAAAATG  
GGGAAAAGGATGAGGGAAGGCGGGGATTGTTTTATAGGGGAGGGGAGGCGGATCGA  
GCCCCGGGAGAGGCGGAGTGGGGCGGCAACCGCGGCTGGCGTGGGCGGCATCGTGGGGTG  
TGGGTGGCGTTTTGGAGGGGAGAGGTGGGGGAAAACGGCGCGGACGTGGGCGGCGAGGT  
CCCACGGACGAGCGCGCGCGCGCGGGGTGGAGGAGGTGGGCGGAAACGGCGGCGTCTGTGG  
GGTGGCTCGGCGGGCATGGCGGCAGTTGTGGCCGGCGTGAGGAAGGGGGATGGGCCTGA  
CAAGTGGTCCCAGGTCCCCTTGTGGCGCTAAGGGAGAGAGATGGGAGAGGGAGGCAA  
AATAGACTTGCAAAAGGAGCGAGCTGGGCGAGGAGGGGAAAGGAGGATTGGGCGGAA  
AGGGGCCCAAAGAGAGGAAGGATTTAATTTGTTTTCTTTTTTTTTTTATTTAATTGATTC  
AATGAACTTTGTGCCATTAATAATTTCTTGTAGCTCCGAAAATTCACGGGAAATTTTCAG  
AGAGTATTTTAGGGCACAAAGAATATTGCAAAATATTCCCGGCAATGATTTTTAAGGGA  
AAATTTAATTCTTCCATTATTTCACTTGATTAATTGCTTTAAATTTTATTTAATTTCT  
AGAAAATGATTATTAATGATTTTTAATCCGAACGAAAATCGGGCGTTACAATGTAC  
GTATAACGTCTGTTTTTGTCTGTATATCATTTCTTTCTTCTCGGTGCTGGTTGTTAATT  
CGTACATACATATGCCTTCTCAGCTTTTTCTGGTCAATATTTTTTATGAAAAGTTTTACT  
GGTAAATTAGGAGGGATAGATTACTATTTATATATAATATATTTATAACAAATCTAATCT  
AATGGTTTAACTAATGGGTCCACTAATTAATGAAAATCGGGGGCTAGATTTTTTTCT  
TTTTCTCTCAGAAATTTCTAAGTTTTTTCTATTTTATTAGAGCTCCATATGACAACTTAAG  
AGCGTTTATTAGACACCATAGTGGTAGTATGAGAGCGTTTGTAGGAAGTTTAAAGACTTT  
AAATTAGTATATATATAATAGACAGGTTAGTCATAAATAATTTCAAGATATATATAAGCA  
TATTTGCACGATTTAGATATATAGTTGCTAAATTTTTAACATGAAATTTTGCTTTTCTA  
ATCAATAAAGCATGAAAATAGATAAAGAATATAACGAAGGATGATGGTACTGTAGATAAT  
GGCACGTACGTACCTACATTACATATAGGCCTGAGCGGGGCGGTTTAGGAGATTGATTT  
TTTAAAGATAAATCTAATGGTTGTAATAATGGGTCCACCAAATTTAATTTAAATCAATAG  
CTGGATGTTTAGGAATTTCTCTAATTTATTATAGTGCCACATGGCTGCTTCAGAGCGTTT  
GTAGGATGCCACGTGGCGGTTTAGGAGCATTTGTAGAAAGTTTAAAGACTTTTAGTATA  
TAATAATAATAATAATAATAATAATAATAATAATAGTCCATCTATTATACTTATAATACT  
TATTTATTATACTTGATTGATTTATACTTGATTGATTTCTATATCTCGAACTATTGTTGA  
CGAAATAAAGAACATGTTAGGAGTGTATATATGGAGCCATGCATAATGGCACGGAAGAGG  
TGTGCAACTTGTAGTGGCGTATTTGCTTTTTTAGATTGTTCTAATTTAATGGTTTAAATTA  
TGGGTCTAACCGGATTAAGGGAATCGATGGTTAGGTGTTTTGTTTTATATAAATGGC  
TTTTATATGTAAATAATTTATTATAGCGTCAATTGGTGGAATGTATATATGTACGTAAAG  
ATAATAACCTGTTGTTCACTGAGGTACATATACACGTATGTTTCACATTATATATAGCTA  
ATCTTGCCAGAGGGTCGTAACCTAATCTTGCTGCCATTTAAATTTGTTTTGACGGAAC  
AATTTTGAGATAAATATGGCAAGGCCAAGATCGTTTTGTCAGACCCATGTCCGACGTCC  
CCACTTGCATTTCTAAATAAGGTAACATCGCGTGGTCTTTGTCTTCTCATGTTGCACC  
ACGCTGACCTTAGGAGCGTTTGTAGGATATCCAGTGGCGCGTTGAGAGTGTATAGG  
AAGTTTAAATGAACTTTTAGTATATAATAGATAATAGATAGATAGATTTCTCCATAAGTA

OsWAKs-Supplemental Data 1[1].txt

ATTACATTGTAGGTAGGGAACGACCCGAACCTTATGACTCATTTATGGTTTGTCTCTTA  
CAAATGATACCATAAATTAATAACACATCGATGTCTGCAAATATCTATCTACAGAACAT  
CTTAGGGCTTGTGGTGGCATTAAATCTTTGGTGCATTTAAATTTCTTAATTCTGG  
ATACAAATTATCCCCACCATAATCCCCATGACCCAAACATACAAGTTAATAGGTTAGGTT  
GAGGGGTATTGAAGGGGGTTGGGGATGATGAGAGAAGGGGATTACCCAATCCACCCCA  
TGTTGCCAAACAATGTTTTAAGCCTTTTTAGTTAATCTCTCTGTCAAGTAGATTGAAGT  
GGATTTAGAGAAAATTAAGGTGTGGACTTGTTCATTAATCTCCTTGAAAAAGGATTGG  
ATGAAATTGAGGGGCCCTCAAAATCCCATCCAATTCTCTTTGTGGGGTGGGAGGTTGCT  
TAACTGAAAAAGACCGAAGGGAATGATTGTTTGAACACACTAAAACCTACGGTTTGCTTA  
ATTGTGTGCTCTAGACTGTTAAGTACAACATGTACATTGATGCCAAAATATTGAAGTTCA  
AACATATGATTAAGCCTTTTCAGTAAGAAAAAACTCCGTCCTTTAGGGCTTGTACCT  
GTGTATTTGTTGGTCTATTTGGTTTCCTTGGATGGGAGGTGATCCGGCACAGACAGAACA  
CAAAAAACAAGCTCTATTAAGACAGACAGATGAATTTTTCAACAACATGGAGGTGAGC  
TACTGCTAGAAATGATGAAGGTAGAGGGCAATGTTGGGTTTACCCTCTATGAGAGAGGGC  
AGATCGAAACTGCAACAAATAAATTTCAACAAGGCACACATTGTCTGGGGAGGGAGGACAGG  
GAACAGTTTACAGGGCAGAGATAGATGGCACTATTGTTGCGATAAAAAGGTGCAAGGAGA  
TTGATGAGAGCAGGAAGATGGACTTTGTACAGGAGCTGGTCATACTTTGTCGTGTCAACC  
ACCCTAACATTGTCAAGCTACTTGGTTGTTGCCTACAATTTGAGGCACCCATGCTTGTCT  
ATGAGTTTGTGCAAAATAGAACACTTCATGAGCTATTGGACTTCCAAAGGAACAGGAGTT  
GCCATGTCACTTTGGGAACCCGCTGAGGATTGCCGCCGAGTCTGCCGATGCGCTTGCGC  
ATCTCCATTGTTACACACCCGATACCTCATGGTGATGTGAAACCAGCGAACATACTAC  
TCACCGAAGAATTGGTTGCAAAGGTGTCTGACTTTGGCTGCTCAACAATTGATGAGAAAA  
CTCAGGTTGCGCCCAAGGGCACACCTGGATATCTTGACCCAGACTACCTGCTTGAGTATC  
AGCTCACAGCTAAGAATGATCTGTATAGCTTTGGAGTAATTCTGGTTGAACCTTCTAACTG  
GTAAGAGGCCACTATCAAAAGAAAGGAAGACCTTGACCTCAATGTTTAAGGAGGCTATGA  
CGGATGGCACACTCATTAACTCCTTGATAGTGACATTGTTAATGAAGACAACCTGAGAG  
TGATCCATCAGGCTGCAGTGCTAGCGAGTCAGTGCTTGATTATTCCAGGTACGGCAAGGC  
CAGAGATGAGGTATGTGGCAGAGCAGCTTCAGCAACTTGCAATTTGCAGATGAAGTGCAGC  
AAGATCCACAGCCACCGCTTGCTTGCGGGTCTTAGGTTTACGGCAGAGATGGCAAATA  
CACGTACAACATCCTCATGGCAAACCTGATAGCAAGACTACCGGGGTTTACAGCCTCGAGA  
AGAATGTTAGACTTTGCTCTAGGATCACCTAG

>OsWAK49, 5443. t00017, Chromosome 4, post-processing

ATGCTCACCAAGGGCGGCGACGGCGAGACTGCAACGGGGAAGCCGGCGGGGCTCCTCG  
GGGAGGCAACGGTGGTCCGGTGGCGTACCACGGCGGAGGCGGCGGACGGTGACCGGGAC  
GACCGGGGCGCGGAGAGGGCGATTTCAAGTGGTCCCGGAGGCGAGGAAGCGGTGGCCGGG  
GTGTGGCTCGGAGTTGCCGATCCGAGGGAGGAAACGGCGCAGTCCGGCGTCGACCGGGGA  
GGCGGGCGACAGATGAGGACGGCAACACGGCGGCGATCTCGGGCTTGTACCTGT  
GTATTTGTTGGTCTATTTGGTTTCTTGGATGGGAGGTGATCCGGCACAGACAGAACA  
AAAAACAAGCTCTATTAAGACAGACAGATGAATTTTTTCAACAACATGGAGGTGAGCTA  
CTGCTAGAAATGATGAAGGTAGAGGGCAATGTTGGGTTTACCCTCTATGAGAGAGGGCAG  
ATCGAAACTGCAACAAATAAATTTCAACAAGGCACACATTGTCTGGGGAGGGAGGACAGGGA  
ACAGTTTACAGGGCAGAGATAGATGGCACTATTGTTGCGATAAAAAGGTGCAAGGAGATT  
GATGAGAGCAGGAAGATGGACTTTGTACAGGAGCTGGTCATACTTTGTCGTGTCAACCAC  
CCTAACATTGTCAAGCTACTTGGTTGTTGCCTACAATTTGAGGCACCCATGCTTGTCTAT  
GAGTTTGTGCAAAATAGAACACTTCATGAGCTATTGGACTTCCAAAGGAACAGGAGTTGC  
CATGTCACTTTGGGAACCCGCTGAGGATTGCCGCCGAGTCTGCCGATGCGCTTGCGCAT  
CTCCATTGTTACACACCCGATACCTCATGGTGATGTGAAACCAGCGAACATACTACTC  
ACCGAAGAATTGGTTGCAAAGGTGTCTGACTTTGGCTGCTCAACAATTGATGAGAAAAC  
CAGGTTGCGCCCAAGGGCACACCTGGATATCTTGACCCAGACTACCTGCTTGAGTATCAG  
CTCACAGCTAAGAATGATCTGTATAGCTTTGGAGTAATTCTGGTTGAACCTTCTAACTGGT  
AAGAGGCCACTATCAAAAGAAAGGAAGACCTTGACCTCAATGTTTAAGGAGGCTATGACG  
GATGGCACACTCATTAACTCCTTGATAGTGACATTGTTAATGAAGACAACCTGAGAGTG  
ATCCATCAGGCTGCAGTGCTAGCGAGTCAGTGCTTGATTATTCCAGGTACGGCAAGGCCA  
GAGATGAGGTATGTGGCAGAGCAGCTTCAGCAACTTGCAATTTGCAGATGAAGTGCAGCA  
GATCCACAGCCACCGCTTGCTTGCGGGTCTTAGGTTTACGGCAGAGATGGCAAATACA  
CGTACAACATCCTCATGGCAAACCTGATAGCAAGACTACCGGGGTTTACAGCCTCGAGAAG  
AATGTTAGACTTTGCTCTAGGATCACCTAG

>OsWAK50, 5491. t00001, Chromosome 4, pre-processing

ATGGTTTCTCCATGGTCTTGCACAGTTGCTTCTCTCTGCTTGTATCGCTTTCTCTCG  
AGCAGTTCTTCCAGATCAGCCCACTCAAGTGCCCAATAGCTCCGTTGATATCCCATTT  
CCTTTCAAAATTGCCACCAACTCAAGCTTAACGTCAACTCCAGGCTTTGCGATATCATGT

OsWAKs-Supplemental Data 1[1].txt

CGTCAAACAGGCCCAATGATTTTGTCTCGGTGGTAACTACAGCGTCCTCAGCATCTCCCTG  
CTCGAGGGATACGTACGTGTGACTGGCCAGACCGTATACTCCTCCCAGTGCCATAACAAT  
AGCCAGGGAATCATCGACCTCACTGCCACAACTACATGTTCTCCACACGCAAAACAAG  
TTCACCGCGTGGTGTGATGCCATGGCAATGATAAGAAACAGCAGCGATGTTGTCTGGT  
AACACCAACAGCACGGTGTGAGCAGATACAGCGGGGGGTGCGTGTCTGCGCATCA  
AATGGAAGCATCATCAGCGGCGAATGCTCCGGTGTGGGCTGCTGCCAGTCGTCACTGCCC  
AAGGGGCTCAACAAGCTGGACTTGGAGTTCACCAGCATACGGGACCAGCTGATGCCACCC  
ACGAGTGGCGTGGTAGCGGCAGCACACGGTGCAGCAAGGCGTTCATCGCGGAGCAGGAC  
TCGTATGTGTTCTCTAGGCATGACCTATACAAGGACTTGGGAATCTGCCGATGGTGCTC  
GACTGGTATATACAGGGTGGCAACTGCAAGGAGGCAAGCCGAGTCGTCAAACCTACATG  
TGCAAGGAGAACAGTTATTGCTATGAGGTGGAAGATGGAGCTGGATATCGCTGCAATTGC  
TCTGGAGGTTACACTGGCAACCCGTACATTGGATGTGTTGGTGAGAAATCCTCAATTCAT  
GTGTTTGGTTGCCAATATAGTATTACTGGCTAGCATGCCTTATTCTAATATCCTTTTTTG  
CTTTGTTTCTACTTTTGTACTACAAGATATCGCCGAATGCAACGACGGGAATAACTATCC  
ATGCACCCACAAGTGCATCAACATAGCTGGTGGTTACAATTGTACATGCCAATGGGCAT  
GACAGGAGATGGCAAGAAGCAAGGCATTGGGTGTAAGAGATACAACAATGTTGTCTAC  
TGTAGGCAAGTCTCTTGCAATCTTTAATATTATTCTCTCTTTTTCGAAATTTTATCAACC  
AGAACAACAATTGATTACTACATGAAGTAGTAGTAACCTCAAGATTCAAATACCCATTT  
CAGGTGGAAGCCTTGGTTTGTATGGCTGTTCTCATTGTTCTTGGCTTTTGGACTTACTGGA  
TAGTGAAGAAGAGGAGGCTTGCAAGCAGAAACAACGATACTTCTTGCAAAATGGTGGTT  
TGTTATTGCAGCAGCAGATATTCAACCCACCAAGCACCTGCAAGGATATTCAACACCAAGT  
AGCTCGAAGATGCAACAACAACCTTCAGCGATGACCGTATTGTTGGTCGAGGTGGATATG

>OsWAK50, gi |37988393|dbj |AK111730.1| Oryza sativa (japonica cultivar-group) cDNA  
clone: J023036D06, full insert sequence

GATAACTTTGCAGCAGGTTTAGTTCTCGTTCTGATAAACAAGCACACATGGTTTTCTCCATGGTCCTTG  
CACAGTTGCTTCTCCTCTGCTTGTATCGCTTTCTCGAGCAGTTCTTCCCAGATCAGCCCACTCAAGTG  
CCCAATAGCTCCGTTGATATCCCATTTCTTTCAAATTTGCCACCAACTCAAGCTTAACGTCAACTCCA  
GGCTTTGCGATATCATGTCTGCAACAGGCCCAATGATTTTGTCTCGGTGGTAACTACAGCGTCCTCAGCA  
TCTCCCTGCTCGAGGGATACGTACGTGTGACTGGCCAGACCGTATACTCCTCCCAGTGCCATAACAATAG  
CCAGGGAATCATCGACCTCACTGCCACAACTACATGTTCTCCACACGCAAAACAAGTTCACCGCGT  
GGCTGTGATGCCATGGCAATGATAAGAAACAGCAGCGATGTTGTCTGGAACACCAACAGCAGCGTGATGA  
GCAGATACAGCGGGGGGTGCGTGTCTGCGCATCAAATGGAAGCATCATCAGCGGCGAATGCTCCGG  
TGTGAGCTGCTGCCAGTCGTCACTGCCCCAAGGGGCTCAACAAGCTGGACTTGGAGTTCACCAGCATACGG  
GACCAGCTGATGCCACCCACGAGTGCCGTGGTAGCGGCAGCACACGGTGCAGCAAGGCGTTCATCGCGG  
AGCAGGACTCGTATGTGTTCTCTAGGCATGACCTATACAAGGACTTGGGAATCTGCCGATGGTGCTCGA  
CTGGTATATACAGGGTGGCAACTGCAAGGAGGCAAGCCGAGTCGTCAAACCTACATGTGCAAGGAGAAC  
AGTTATTGCTATGAGGTGGAAGATGGAGCTGGATATCGTGCAATTGCTCTGGAGGTTACACTGGCAACC  
CGTACATTGGATGTGTTGATATCGACGAATGCAACGAGCGGGAATAACTATCCATGCACCCACAAGTGCAT  
CAACATAGCTGGTGGTTACAATTGTACATGCCAATGGGCATGACAGGAGATGGCAAGAAGCAAGGCATT  
GGGTGTAAGAGATACAACAATGTTGTCTACTGTAGGTGGAAGCCTTGGTTTGTATGGCTGTTCTCATTG  
TTCTTGGCTTTTGGACTTACTGGATAGTGAAGAAGAGGAGGCTTGCAAGCAGAAACAACGATACTTCTT  
GCAAAATGGTGGTTTGTATTGACGACGAGATATTCAACCCACCAAGCACCTGCAAGGATATTCAACACC  
AGTGAGCTGAAGATGCAACAACAACCTTCAGCGATGACCGTATTGTTGGTCGAGGTGGATATGGTACAG  
TGATAAAGGGGATACTATCTGATCAAAACCATTGTGGCTATCAAGAAGTCAAAGCTTGTGGATCAGAGCCA  
AATGGAGCAATTTATCAACGAGTTGATAGTTCTTTACAGATTGATCACAAAAATGTGGTCAAGATATTG  
GGCTGTTGTCTTGAGACTGAAGTGCCCTTACTGGTTTATGAATTTATATCGAATGGAGCTCTGTTCCACC  
AACTTCATAATACAAATTTGGTACCAATTTTATGGGAGCATCGTCTTAGGATAGCAACTGAAACTGCATC  
AGCTCTTGCAAATCTTCACTTAGCAAGAAAGGTGCCAATCATCCATCGTGATGTGAGTCTGCCAATATA  
CTGATTGATGAGAACTACACCGCAAGGTATCAGACTTTGGCGCTTCAAGGCTAGTCCCTTCCAATCAGA  
CACATGTAACAACCTTAGTCCAAGGAACATTAGGATACTTGGACCCTGAGTACTTTTACACAAGCCAAC  
AACTGACAAGAGCGATGTATATAGCTTCGGTGTGGTTCTTGTGAGCTATTAAGTACAAAAACCGATA  
TCTTATCATAGGCAAGAGGAAGGGATAAATCTAGCTTTCACATTTACGGCGCTTGCCAGCAGAACCGAC  
TACAGGAGATTGTGGACTGCGTGTGGTGAAGGAAGCTGGAATGAGGCATGTTAATGTGGTGTGCGATTT  
GATTCTGAAGTGTTTGAAGCTTAAAGGGGAAGAGAGGCCAAGGATGGTAGAAGTAGCAATTGAAGTTGAA  
GCGCTCAGAAGGTTAATGAACAACACCTGTCCCTGAAAAGTGAAGGCTTTGAGAGAGCTTATGGAGC  
AGCAATCTGCTGAAGATTGCCAAGAGATGCAGTTGCTTCAAGAGGAGAGCGGCCAGGAAAAAATGAGTAA  
CATTGAGCCGCTGAAGTTGTACCACAGGGACAGTGCCTCGGATAAATGCATGGAGAGCAGTCCACTTCTA  
TCAATGGACCTCCCATGGTAGTGACAATATATCAACTGAGGTGGTGTGTTGAATCTCTGAAAATGAAAA  
CAAAGATAAAAAATTAAGTGTGTTTATGC

>OsWAK51 9632. t04098, Chromosome 4, pre-processing  
ATGGCATACACATCCAACGCTGCCTATAGGAAAGGAGCAATCTCCAAGGGTACTTGTGGG

OsWAKs-Supplemental Data 1[1].txt

AGGCTAATTCTGGAGAAAACCTGCATCTGGTATGAACCTTAGTTACTCTTCTGATAGGCACG  
GATTGAACTGCCTAGCTATTTTCAGCTGAATTTTACAGAATTATTAATTTCTTATATGTGT  
ATATATGTGTAGTTTCCAATGAGAGCTAGCAACATTTATATGCTCATATCATGCTTCATC  
AGTTATAAACTGTACTTCACTCATGATCTTAATAAAATTGGCCTGGGCTTCTTTGCGCCG  
CGGCCGGTGATTTTTTTTTTTTTTGGCTAAATCAGTTAGATGTCAGGAATATAGGAATTGG  
TCTAAATCTTACCAGTCTGAATTTCTCGAGGGCAGAAAGTTACTAATAAAGTAGGTACA  
ATTAATGAGGGATGATTGTGAGTGGATGATAAATAGAAGTATAGATGATGAAATTGAGT  
GACGTAGAGTTGTGTTTGGTTGATAATAGAATATTGGTGAAGAGGTTGTTATATTCTAGG  
ACAAATTTCTGAAGGCTAAATGTTGTTATATTTTAGGACGGGAAATAATATATTGACATGC  
ATGCGTGTATCATATCGTTAATAGTGTGTCATGATGTTCTACATTAATAAAACTTG  
CGCCAAATATTTAGCTTTATGATATGGTTGCTTAATTAGTTATGATGTTTTGTGATGGTT  
TGTCAAACATTTAAGCAGTCTAATAGTTATGTAGTATGTTTTCGTTTTATACTTCATAG  
CTGAATGTACGAGAAAAGAATTCAATCTCACCTTATCTTTAATGTGGTCTCAATGACTA  
GATTAATTTAATTAGAAGCTACTGATTTTAAATAAAAAATATTGATGAAACATTATCATG  
GTTTCTCAATTCTAATTTCTCCAGCCAAGGAATATGAATACGATGCTGCAGCTTGGCGTTA  
GTCTTCTACTTCTGGCAGCAAAACACACTATTGCGACGGCAGCAGTTCCTAGCCCTCAAT  
GCCAAAGTGGTGCGGGGATGTTGACATACAGTACCCGTTTGGCATTGGAGCGAATTGCT  
CACTCGCAGAATTGTTCAATGTGCAATGCAAGGTCCAACATGGCATTCTAAGCCATTTA  
TCGGCAACGTTGAGGTACTAAATATTTGTTGAGCCGTAGCACATTGCGGGTACTCAATG  
GCATCTCAACCTTTTGTACAATGCCTCCGGTCTTATGGGAGGGGTTCATTTTCGTTTCA  
ATGCAAGAATAACCCCTTCCGGTTTTTCAGATGTCTACAACAAGTTCAACGTAATTGGGT  
GCAACACCCTTGCCTATATCGCCGATGATGGTGGCAGGGTTACCAAAGTGGGTGTTTCT  
CGCAGTGTGTCGACCTGTCAGGGCTAGTGGATGGCTCTTGTTCGGCATGGGCTGCTGCC  
AGACCACGATACCAAGAGGAATGTACTACTATAATGTTACTTTTGATAAGAGATTCAACA  
CAAGCCAGATCTCGAGGTTCCGGTCCGTGCAGCTATGCCGTGCTGATGGAGGCAGCATCGT  
TCAATTTTCAGCAGCATACATAAACACCACCAAGTTTAAATGGCACAACCGCGGGCGGG  
TACCCATGGTGATCGATTGGGCTATCAGAGAGAAGTCATGCGATATTGCCAAACAGAACA  
TGACAAGCTATGCTTGTCTTAGTAGCAACAGCGAGTGTGTGGCTTCCACCAATGGACCTG  
GGTACGTCTGCAACTGCTCTCATGGATACGAAGGTAACCTTATCTTCCAGACCCACATG  
GATGCCATGGTATGTATAGCCCTCTTGTAAATTGATTTATTTGTATGTGCACAAATACTA  
GATCTATCTCACCTATGTTGTGTTCTACATATAATTATGCTAAGTTTACGACAGATGTT  
AATGAATGTGATCGCAACCCATGGCCATGCCCTTCCGGTGGTGTGGCCACAACACGGAA  
GGAGGCTACCGGTGTTCTTGTGCGGAAGGGAAGGAAATTTTCCAAGAGCAGCAATACATGC  
ATCCCTGATATCGGCTTGATAATTGGTATTCATTTAACTCCTTATCATTTTTATGTACTT  
TTATGATCTTCAAATAATAAAGGAATACAAGTTCCTGACTACTCTGAAATGATCATTGAT  
CCTATCTTATGATGCTGATGCGTTGTGTAGGGGTTATTATAGGCTTCATTGTTCTCATGA  
TCATTGCCTTCTGCGGACAATTGGTAATTCAAAGGAGAAAACCTGACCAAAATCAAGAAAG  
AATATTTTCCGCAACATGGGGTATGATTTTGTGTTGAGAGTATGAAATCAAAAAAAGGTC  
TTGCTTTTCACAGTATTTACAGAAGCTGAACCTCATACATGCCACAACAATTTTGACAAGA  
GCAGAATAATTGGCCAAGGAGGTGATGGAACGGTATATAAAGGGACAGTCAAGGACAACA  
TGCTAGTCGCAATTAAGATGTGCACTAGTTGACGAAAGACAAAAGAAGGAGTTCGGCC  
AAGAAATGCTCATCTATCCCCAATCAATCACAAGAACATTATAAAACTCCTAGGTTGTT  
GCCTTGAGGTGCAAGTTCGGATGCTAGTCTATGAGTTCGTCCCGAATGGAACATTATTG  
AGCTTATCCATGGAAGAACCAAGGGTTGCAAAATCTCTTTCAGCACCTCTTGAGGATTG  
CTCATGAAGCAGCTGAAGGGCTTCACTTCTACATTCCTATGCATCTCCACCAATTCTCC  
ATGGTGTATGAAAACCTGCCAACATACTTCTTGATGAGAACTACATGGCCAAAGTGACAG  
ACTTCGGAGCATCTATACTAGCTCCATCCGACAAAGAGCAGTTTGTACAATGGTTCAAG  
GTACATGTGGCTATCTCGATCCCGAATACATGCAAACGTGCCAATTGACCGACAAGAGCG  
ATGTGTATAGCTTCGGTGTTATCCTTCTAGAGATTCTCACAGGCCAAGTGCCACTGAAGC  
TCGAAGGACCTGCGATACAAAGAAGCTTGTATCATGATTTTCTATCTGCCATGAAGGGGA  
ACAATCTTGACTCGGTGTTGGTGAGCGACATAAAAGGCCAAGAGAGCATGGAACATAATCG  
GGGACTTGCTGAGCTAGCCAAGCAATGCCTTGATATGTGCGGCGCCAACAGGCCATCGA  
TGAAAGAAATCACCGACGAGCTGGGCCGATTGAGGAAGCTTTCACTGCATCCTTGGGTAC  
AAGTCGATGCAGAGATGGCACCAGAGAACCTTCTTGGCGGACCATCTACAATTAATAGTG  
GTCTTGAGATTGAAACAAGTAGTACCGGCTATCTTGGGGAGGAACGTGAGAACCTACCGA  
TGAACCCAGGAAGTACGTATTATGCGAGGTGA

>OsWAK51 9632. t04098, Chromosome 4, post-processing  
ATGGCATACACATCCAACGCTGCCTATAGGAAAGGAGCAATCTCCAAGGGTACTTGTGGG  
AGGCTAATTCTGGAGAAAACCTGCATCTGCAAAACACACTATTGCGACGGCAGCAGTTCCT  
AGCCCTCAATGCCAAAGTCGGTGGGGGATGTTGACATACAGTACCCGTTTGGCATTGGA  
GCGAATTGCTCACTCGCAGAATTGTTCAATGTGCAATGCAAGGTCCAACATGGCATTCT  
AAGCCATTTATCGGCAACGTTGAGGTACTAAATATTTGTTGAGCCGTAGCACATTGCGG

OsWAKs-Supplemental Data 1[1].txt

GTACTCAATGGCATCTCAACCTTTTGTACAATGCCTCCGGTCTTATGGGAGGGGTTTCAT  
 TTTTCGTTTCAATGCAAAGAATACCCCTTCCGGTTTTAGATGTCTACAACAAGTTCACC  
 GTAATTGGGTGCAACACCCTTGCCTATATCGCCGATGATGGTGGCACGGGTTACCAAAGT  
 GGGTGTCTCTCGCAGTGTCTGTGACCTGTACAGGGCTAGTGGATGGCTCTTGTTCGGCATG  
 GGCTGCTGCCAGACCAGATACCAAGAGGAATGTACTACTATAATGTTACTTTTGATAAG  
 AGATTCAACACAAGCCAGATCTCGAGGTTCCGGTCCGGTGCAGCTATGCCGTGCTGATGGAG  
 GCAGCATCGTTCAATTTAGCAGCAGACATACATAAACACCACCAAGTTTAAATGGCACAAC  
 GGCGGGGGGGTACCCATGGTGATCGATTGGGCTATCAGAGAGAAGTCATGCGATATTGCC  
 AAACAGAACATGACAAGCTATGCTTGTCTTAGTAGCAACAGCGAGTGTGTGGCTTCCACC  
 AATGGACCTGGGTACGTCTGCAACTGCTCTCATGGATACGAAGGTAACCCTTATCTTCCA  
 GACCCACATGGATGCCATGGGGTTATTATAGGCTTCATTGTTCTCATGATCATTGCCTTC  
 TGCGGACAATTGGTAATTCAAAGGAGAAAAGTACCAAAATCAAGAAAGAATATTTTCGC  
 CAACATGGGGGTATGATTTTGTGAGAGTATGAAATCAAAAAAAGGTCTTGCTTTCACA  
 GTATTTACAGAAGCTGAACATACATGCCACAAACAATTTTGACAAGAGCAGAATAATT  
 GGCCAAGGAGGTCATGGAACGGTATATAAAGGGACAGTCAAGGACAACATGCTAGTCGCA  
 ATTAAGAAGATGTGCACTAGTTGACGAAAGACAAAAGAAGGAGTTCGGCCAAGAAATGCTC  
 ATCCTATCCCCAATCAATCACAAGAACATTATAAACTCCTAGGTTGTTGCCTTGAGGTC  
 GAAGTTCCGATGCTAGTCTATGAGTTTCGTCGCGAATGGAACATTATTCGAGCTTATCCAT  
 GGAAAGAACCAAGGGTTCGAAATCTCTTTCAGCACCTCTTGAGGATTGCTCATGAAGCA  
 GCTGAAGGCTTCACTTCTCATCTTCTATGCATCTCCACCAATTCTCCATGGTGATGTG  
 AAAATGCCCAACATCTTCTGATGAGAACTACATGGCCAAAGTGACAGACTTCGGAGCA  
 TCTATACTAGCTCCATCCGACAAAGAGCAGTTTGTACAAATGGTTCAAGGTACATGTGGC  
 TATCTCGATCCCGAATACATGCAACGTGCCAATTGACCGACAAGAGCGATGTGTATAGC  
 TTCGGTGTATCTTCTAGAGATTCTCACAGGCCAAGTGCCACTGAAGCTCGAAGGACCT  
 GCGATACAAAGAAGCTTGTCTATCAGTTTCTCTATCTGCCATGAAGGGGAACAATCTTGAC  
 TCGGTGTTGGTGAGCGACATAAAAGGCCAAGAGAGCATGGAATAATCGGGGACTTGCT  
 GAGCTAGCCAAGCAATGCCTTGATATGTGCGGCGCCAACAGGCCATCGATGAAAGAAATC  
 ACCGACGAGCTGGGCGGATTGAGGAAGCTTCTACTGCATCCTTGGGTACAAGTCGATGCA  
 GAGATGGCACCAGAGAACCTTCTTGGCGGACCATCTACAATTAATAGTGGTCTTGAGATT  
 GAAACAAGTAGTACCGGCTATCTTGGGGAGGAACGTGAGAACCTACCGATGAACCCAGGA  
 AGTACGTATTATGCGAGGTGA

>OsWAK52 9632. t04787, Chromosome 4, pre-processing  
 ATGCCGTGCAGAAGAGCAAGCACACCGGCCGCTGCAGCTGCAGCTGATCCTGCTGTGGCT  
 GCATGGCCTCTCACCCCACTGGTGCTGGCGCTCGCCGTCTTCTCGGCGATGCCTCACGTC  
 ACGCTCTCCCGGGGACGGGAGAATCAGTGGCCGCTCTAGAGGGAAACTCGCAGCTGACG  
 ACGACGAAGAACCTGTCTGCGACGAAGTCCCTTATCCCTTCGGCTTAAAGGCAAATCT  
 GCCCTTGCCTTCCGGAATAACATGCCGAAAAACGACAGTGCTGCCATGCTCCGATTGGC  
 CATCAAAAATTTGCAATCGATCAGGTGTCTTCGAGGAAGGTTTCGTCTCATATTTGCA  
 GGCCCCATCTACCGGTTGTGCTACGATCGCAACGGCCGGCCGGTCTGTTGGGAGCACCGGA  
 ATCGGGCCGACGAATTTGACGGACACGCCGTTCTTCTTCTCCAAGCGCAACACGCTCGTC  
 GCCACCGGCTGTTACTCCAACCTTACTGCTACCTTCACCAGCTCGCTACACCATCATGGT  
 TGGTCTACTAACGGAAGCTGCACAACCAACGGCAGAGTAACTCTGACGGATTGTGCCCC  
 GGGACGGCCTGTGCGACGCCCTACGGCATGCCGTTGGACGACGCGCAGGAGGTCACCTTC  
 GAGTCTCAACAAGACATCGGCGAGCGTGGCCGGCACCTGCAGCGCAGCCTTCATCTCTAC  
 CAAAAAGAGCAGATCTTCAAAGTCAGCGGTAACAGCAAGCCAATGCATCTCCACCAAGAA  
 GAGCACATCTTCAGAGCCGGCGGGCGGTGACAGCAAGCCAGTGCATCTGGAAGACGTTCTG  
 GTGCCTTTGGGTGAGCGAAGGATGGTCTTGGACTGGGTGATTGGGCGCGCCACCTGTGAG  
 CAAGCCCGGAACAACAGCTTCAAGACACAGTACCGCTGCAACAACGAGAGCTCATGCATG  
 GACAGGTTTCATGGGAGAGGGCTACGTGTGCAGATGCAAAAGCAGGGTACGACCAACACAAC  
 GGAATCCATACGAGGCAGGCGGCTGCCAAGGTAAATAGTAGATACTTCTAAACACAGTG  
 ATCTAAAAAATATGCACTAGCTAGTGAAAACAGTTTGTATAGTTTCTTCTGTTTGTAT  
 CATGGCAGAATTCAATTACCATAGAATTAAGCTAAGTCTATGAATAGAATGTATTTTT  
 CTGCTTTCTCAATGTGGCTTCACTATTTATGAAGATATCAACGAATGCCGGTCTCTCA  
 TTTACAACAACCTGTAGCTACTGTGCATAACACTCCCGGAGGATATACTTGCTCTTGCC  
 CCAATAATAAGACTGGTATGGCTACAGGACAGGGACAGGGTGCATTGCCATCCGCGC  
 CACCTGGTAAATACATGCCATATATTTTTTCCGACTGCTTTTGTAAAGATAATGGGATA  
 TTTTTTTAGATTGCATATAATCTACTTATTCTAGAATTTCTGTTCAAACAACCATATTA  
 ATCACCACGTGTTATTTCTAGACCAATTTTGAGATAAGTTGGAAAACCTCAAAAAAAAAA  
 AAGCTTTTAAACGGTTCTTCTGGGTACTTTTATGTTTGATTGGATGAGAAAAGATGAAA  
 GGTCTAAATGATTCTACTACCAATAAATACCACAGTAAGAATTTTCTCTTTTAACTG  
 GACTATGCATGAACCTTAGATTGCCTGGGTGATAGGAGCTTTGTTCCCTTTTAACTTAAA  
 GAAATGTCAATATGAATTGATATATTTCTTCCGGTTGAAACGCTAAAATGATATTGTATG

OsWAKs-Supplemental Data 1[1].txt

CATCTCCTATATATGGCTGGATTACGCTGTAATATTTCTTCTCTAAAAAAATTCTGCAAT  
AGTTACTCGTAATAATGCGTGATGATCTGACCAAGATCATATATTCTCTCTCATGCAG  
GCGCCCTACCCACAACCAACCGCAAGGTATCATAAAACAAAGTGCTTTGTTCAACACAC  
AGAAGAGCATTTTAAAGTGCAGTCTTTCTAATCAGGAAATTATTATTTGTTCAATGTACCG  
GGAGAAGCTTCGAAATCTTGTTTACAACATCTAATAATGAACAGTAGCGGCCTAATCAT  
TTTTCATTTGGAAAACATCTCCTAATTGCATGCAATTTACTATTATTAGGCCTAGATGTG  
TGCAGAGAATTGAACCTTGCACGTAATCAAAATCCTGCAAGGATGAGCAAGGAGTTACT  
TCGTGTGTTTGCCCGAAAGGCATGATCGGCGATGGCCAGAAGAATGGGAGTGGCTGCAAA  
AAGCAGTTTTCTTTATATACCGCTTTGGGTAAATATGCTCAACACCCGGCATTCCACATC  
AGATCATTCATTTTCTCTCTTTTATTTTAAATCCTCTGCTATTAATACAGTTGTCAAAA  
ATATCTCCCGTGCAAGCTGCTAATCTACAGTATATAGCCGCTGATGATTACGTCATTAC  
TAACATGAATGATTGAACATCATATAGATATGACCAGTGATTGACTGCATTCATGATTA  
ATGATTCAAGTTGAGCTAGCAAACTAGATTAGACATAGCTAATGACGATAAACATTAATA  
ATGTGTTAAGGTTGTAATAAATACCTCAATATTGTTTCTGGACGAAAGAATTGAAGTCGG  
AGCTCATAAATAAACCGGAACCATGCACAAATCACAATTTACAATCTGCAGACAAATAGT  
CGTTCGGTCAAAGGCTCCTAATATTGATTGCAATTTTATACTTCTTTTACTTCCACAAG  
ATATCATTGAGAAATAAGACTAACACAAGTTGTGAATATTCTCATCCAGTGTCTGCAGGT  
GTAGCTCTTGCACTTACGGCCACGCTAGCTACAGTGTTGTTGTGCTACTACTTGACAATG  
AAGAAAAGAAAGGTGGAAAGAAACAGAGCTGAGTTATTCAGGAAGAATGGAGGATTGCTA  
CTGCAGCAAGATTTTCGATGATGACATCTCAAGGTGAGGATTCATCAGCGAAGATATTT  
AGTGCAGGAAGAACTCAAGGATGCCACTGACAACATAGTGAGAGTCGGATCCTTGGTCGA  
GGCGGAAGTGGGATGGTTTACAAGGGTATCCTTCCAAATAATACCACGGTTGCCATAAAG  
AAGTCCATCTTGTGTTGATGAAAGCCAGGTGGAGCAATTTGCCAATGAGATTACCATCTTA  
TCGAGATTGATCACCCAAATGTTGTCAAGCTTTTGGGTTGCTGTCTAGAGACAAACGTT  
CCGTTGTTGGTTTACGAGTTCATACCTAATGGAACACTCTTCCAGCACATCCACAACAGG  
AGTTCTTTAAGATGGGAAGATTGCTTAAGGATAGCTGAAGAAACAGCCGAAGCACTTGAC  
TATCTGCACTCTACATCTTCTACACCAATCATTACAGAGACATCAAATCAAGCAACATA  
CTTTTGGATGAGAAGTTGATGGCTAAAATATCAGACTTTGGTGCATCAAGATCAGTCCCA  
TTTGATCAAACCTCATGTAACAACCTCTAATTCAAGGAACAATTGGGTATCTCGATCCTGAA  
TATTTCCAAAGCAGCAAGCTCACAGAGAAGAGTGACGTTTACAGCTTTGGAGTAGTTCTT  
GCAGAGCTATTGACAAGGCAGAAACCTATTTCTGCAAGCAGGCCGGAGGAATCCTGTAAC  
TTAGCCATGTATATTGTGAATTTATTTAATGAAAGGCGTCTACTACAGGAGATAGAGCCA  
CACATTTTGGCAGAAGCAGGTGAAGAGCAGATACATGCTGTTGCCAGCTCTCAGTCAGA  
TGCTTAAATTTGAAGGGAGAAGAACGACAGTTATGAGGGAAGTGGCTTCAGTTCTACAT  
GGGCTAAGAGAGTCGTTTGACGAGGAGCAAATCATCAGAAGAAGCAATGAATCAATACAG  
ATAACTAATGGACAAGACAGTGATACATAGTGAGGCAAGACCAATCCCAGCTTGCAAGTCT  
TCAGGGGAAATTACCACTGAGTACAGCTTGCCAGCTGAAATACTGCCTTCTTCTTACTTG  
GCAAGATGA

>OsWAK52 gi |37988572|dbj |AK111909.1| Oryza sativa (japonica cultivar-group) cDNA  
clone: J033079C23, full insert sequence

GGCATCGCCGCCGCCGCCGCCGCTAGCAACAAAACGCAATTAGAACGCGAGCGAAGATGGATTGACG  
TCTACAAGCCCGAGGGGATTGCCACTAATCACCAGCAACGGAGCGGCCAAGCAGTCCAACCGCGCCACGC  
TCATTGGGGTAAGTCAAAGCATGAGGTATATCTCTAATCCTAACCATCAACCATGTAGGTTTACTGCT  
CGACAAGAAGTTGGTTCACTACTCAACTATTTATAGTACATGATGGTTAGGTCAGAGGTTGAGGATTGGAA  
GTTGGAAGGCTTGGCCTCAACCAATTTTTTTAGGGACAAACACCCTTGATAGGTCTAGGGCTGCAGTTTG  
CCGATCCCCTAACACAGACGTGCGCACTAATATCTTTGCCTAAAAAAATTACGGAAGTGAACATTTACA  
AAATTCCTTTACAGTATCGTAATAAGAGCATCATCTTGCCAAGTAAGAAGAAGGCAGTATTTAGCTGGC  
AAGCTGTACTCAGTGGTAATTTCCCCTGAAGACTGCAAGCTGGGAATTGGTCTTGCCTCACTATGTACAC  
TGTCTTGTCCATTAGTTATCTGTATTGATTCAATGCTTCTTCTGATGATTTGCTCCTCGTCAAACGACTC  
TCTTAGCCCATGTAGAAGTGAAGCCACTTCCCTCATAACTGGTCGTTCTTCTCCCTTCAAATTTAAGCAT  
CTGACTGAGAGCTGGGCAACAGCATGTATCTGCTCTTACCTGCTTCTGCCAAAATGTGTGGCTCTATCT  
CCTGTAGTAGACGCTTTTCATTAAATAAATTCACAATATACATGGCTAAGTTACAGGATTCCTCCGGCCT  
GCTTGCGAGAAATAGGTTTCTGCCTTGTCAATAGCTCTGCAAGAAGTACTCCAAAGCTGTAAACGTCACTC  
TTCTCTGTGAGCTTGTCTGCTTTGGAAATATTCAGGATCGAGATACCAATTTGTTCTTGAATTAGAGTTG  
TTACATGAGTTTGATCAAAATGGGACTGATCTTGATGCACCAAGTCTGATATTTTAGCCATCAAGTTCTC  
ATCCAAAAGTATGTTGCTTGATTTGATGTCTCTGTGAATGATTGGTGTAGAAGATGTAGAGTGCAGATAG  
TCAAGTGCTTCGGCTGTTTCTTCACTATCCTTAAGCAATCTTCCCATCTTAAGAAGTCTGTTGTGGA  
TGTGCTGGAAGAGTGTTCCATTAGGTATGAACCTGTAACCAACAACGGAACGTTTGTCTCTAGACAGCA  
ACCCAAAAGCTTGACAACATTTGGGTGATCAATCTGCGATAAGATGGTAATCTCATTGGCAAATTTGCTCC  
ACCTGGCTTTTCATCAAACAAGATGGACTTCTTTATGGCAACCGTGGTATTATTTGGAAGGATACCTTTGT  
AAACCATCCCACTTCGGCTCGACCAAGGATCCGACTCTCACTATAGTTGTGAGTGGCATCCTTGAGTTC  
TTCCGCACTAAATATCTTGCCTGATGAATCCTCACCTTGAGATGTCATCATCGAAAATCTTTGCTGCAGT

OsWAKs-Supplemental Data 1[1].txt

AGCAATCCTCCATTCTTCCTGAATAACTCAGCTCTGTTTCTTTCCACCTTTCTTTCTTCATTGTCAAGT  
 AGTAGCACAACAACACTGTAGCTAGCGTGGCCGTAAGTGAAGAGCTACACCTGCAGACACTGGATGAGA  
 ATATTACAACTTTGTGTTAGTCTTATTTCTCAATGATATCTTGTGGAAGTAAAAAGAAGTATAAAATTGC  
 AATCAATATTAGGAGCCTTTGACCGAACGACTATTTGTCTGCAGATTGTAAATTGTGATTTGTGCATGGT  
 TCCGGTTTATTTATGAGCTCCGACTTCAATTCTTTCTGCCAGAAACAATATTGAGGTATTTTTACAACC  
 TTAACACATTTTTAATGTTTATCGTCATTAGCTATGTCTAATCTAGTTTTGCTAGCTCAACTGAATCATT  
 AATCATGAATGCAGTCAATACACTGGTCATATCTATATGATGTTCAATCATTTCATGTTAGTAATGACGTA  
 ATCATCAGCGGCTATATACTGTAGATTAGCAGTTCTGCACGGGAGATATTTTTGACAACTGTATTAATAG  
 CAGAGGAATTAATAAATAAAGAGAGAAAAATGAATGATCTGATGTGGAATGCCGGGTGTTGAGCATATTTA  
 CCCAAAGCGGTATATAAAGGAAACTGCTTTTTGCAGCCACTCCCATTCTTCTGGCCATCGCCGATCATGC  
 CTTTCGGGCAACACACGAAGTAACCTCTTGTCTATCCTTGCAGGATTTTGAAGTACGTGCAAGGGTTCAA  
 TTCTCTGCACACATCTAGGCCTAATAATAGTAAATTGCATGCAATTAGGAGATGTTTTCCAAATGAAAAA  
 TGATTAGGCCGCTACTGGTTCATTATTAGATGTTGTAAACAAGATTTTGAACGTTCTCCCGGTACATTGA  
 ACAATAATAATTTCTGATTAGAAAGACTGCATTTAAATGCTCTTCTGTGTGGTGAACAAAGCACTTT  
 GTTTTATGATACCTTGCAGTTGGTGTGGGTAGGGGCGCCTGCATGAGAGAGAGAATATATGATCTTGGT  
 CAGATCATCACGCATTATTACGAGTAACCTATTGCAGAATTTTTTTAGAGAAGAAATATTACAGCGTAATC  
 CAGCCATATATAGGAGATGCATACAATATCATTTTTAGCGTTTCAACCGGAAGAAATATATCAATTCATAT  
 TGACATTTCTTTAAGTAAAAAGGGAACAAAGCTCCTATCACCCAGGCAATCCTAAGTTTCATGCATAGTCA  
 CGTTAAAAGGAACAAAATTTCTACTGTGGTATTTATTGGTAGTAGAATCAATTTAGACCTTTTCATCTTTT  
 CTCATCCAATCAACATAAAAGTACCCAGGAAGAACCCTTTAAAAGCTTTTTTTTTTTTTTTTGTAGTTTTCC  
 AACTTATCTCAAAATTTGGTCTAGAAATAAACCGTGGTGATTAATATGGTTGTTTGAACAGAAATTTAGAG  
 ATAAGTAGGATTATATGCAATCTAAAAAATATCCATTATCTTAAACAAAAGCAGTCGGAATAATATA  
 TGGCATGTATTTACCAGGTGGCCGATGGGAGTCAATGCACCCTGTCCCTGTCTGTAGCCATCACCAGTC  
 TTATTATTGGGGCAAGAGCAAGTATATCTCCGGGAGTGTTATGACAGAGTACGCTACAGTTGTTGTAAA  
 TGAGAGACCGGCATTCTGTTGATATCTTCATAAATAGTGTGAAGCCACATTGAGAAAGCAGAAAAATACAG  
 TTCTATTATAGCAGTTAGCTAAGTTCTATGGTAATTGAATTTCTGCCATGATACAAACAGAAAGAACTA  
 TAACAAACTGTTTTCTACTAGCTAGTGCATTTTTTTTTTAGATCACTGTGTTTGAAGTATCTACTATTTACC  
 TTGGCAGCCGCTGCCTCGTATGGATTCCCGTTGTGTTGGTGTACCTGCTTTGCATCTGCACACGTAG  
 CCCTCTCCCATGAACCTGTCCATGCATGAGCTCTCGTTGTTGCAGCGGTACTGTGTCTTGAAGCTGTTGT  
 TCCGGGCTTGTCTACAGGTGGCGCGCCCAATCACCCAGTCCAAGACCATCCTTCGCTCACCCAAAGGCAC  
 CAGAACGTCTTCCAGATGCACTGGCTTGTGTACCCGCGCCGCTCTGAAGATGTGCTCTTCTTGGTGG  
 AGATGCATTGGCTTGTCTTACCGCTGACTTTGAAGATCTGCTCTTTTTGGTAGAGGATGAAGGCTGCGC  
 TGCAGGTGCCGGCCACGCTCGCCGATGCTTTGTAACCTCGAAGGTGACCTCCTGCGCGTGTGCTCAACGG  
 CATGCCGTAGGCGTGCAGCAGGCGCTCCCGGGGCACAATCCGTGAGAGTTTACTCTGCCGTTGGTTGTG  
 CAGCTTCCGTTAGTAGACCAACCATGATGGTGTAGCGAGCTGGTGAAGGTAGCAGTAAAGTTGGAGTAAC  
 AGCCGGTGGCGACGAGCGTGTGCGCTTGGAGAAGAAGAACGGCGTGTCCGTCAAATTCGTCCGCCCGAT  
 TCCGGTGTCTCCACGACCGGCCGCGCGTTGCGATCGTAGCACAACCGGTAGATGGGGCCTGCAAATATG  
 ACGAGCAAACTTTCTCGTAAGACACCTGATCGATTGCAATTTTTGATGGCAATGCGGAGCATGGCAG  
 CACTGTGTTTTTCCGGCATGTTACCCTGAAGCCAGGGGCAGATTTGCCTTTTAAGCCGAAGGGATAAGG  
 GACTTCGTGCGACGACAGGTTCTTCTGCTGCTGCTGAGCTGCGAGTTTCCCTCTAGAGGCGGCCACTGATTC  
 TCCCGTCCCCGGGAGAGCGTGACGTGAGGCATCGCCGAGAAGACGGCGAGCGCCAGCACCAGTGGGGTGA  
 GAGGCCATGCAGCCACAGCAGGATCAGCTGCAGCTGCAGCGGCCGGTGTGCTTGTCTTCTGCACGGCAT  
 GTCGTGCGCGCTTTGCTTGTCTTCTTCTCGGTGGTGCATACAGCATAGACGAGCGCCGAGAGAAGC  
 TATGTTGGGAGTGTGAATGTGAAGGGTCATTGTGCGCGAAAGCGTGCTAATTTCTTGTGGCTACTGG  
 CTACATGTTGGTTTTAAATTTTTAATTGTTTCTCAGATTAACCTGGAACCTCTATGTATTCTCATGAGAC  
 TGAATAAACTTTTACTCCCCC

>OsWAK53 9632. t04791, Chromosome 4, pre-processing  
 ATGGCAAAGATGATGCTTTACCTTCTTCTCCTGCCATTGCTCCTCCTCACATGCATCTTT  
 GCATCTTATGTTTCATTGATGGAATCAAGCACCTCAAGTGCTCCAATATTTCCATCCCT  
 TATCCCTTTGGTATTCTTGGTGGGAACCCTGCCAGCCCAAGGGTTTGAAGTACATGT  
 GCCTCATCTGGCCGATGGTACGCATTAACAATATCATGTTTGGGATTCTTAACATCTCG  
 TTGCTGGATGGTTTTGTAAGCATCTTGGCCAGTGCCACTTCTCAGCAGTGCAAAAGGAAT  
 TCTAGCTTCAGCCTTGAGGGGACCAATTTACGTTCTCAGATACAAGAAACAAATTTACA  
 GCTCTGGGTTGTGATATGGTAGCCATGCTATTGAACGGTAGCAGCGGGTATAGCGGTGGC  
 TGTGCTTTCTTTTGTCTCCACCAAAAGCAATATAATTGATGGTATGTGCTCTGCGCTGGCT  
 TGCTGCCAAGCACCAGTACCGAAGGGGTAAAGAAGCTTGAGTTGGAGTTCACTAACATA  
 ACTGGGCAGCTCAGCAGGCCCAAGGAGGTCAATAATACTCCAACATGTGGCGAGGCTTTC  
 ATCGTGGAGCAGAACTCCTATGTTTTCTCTAGTGTTGATCTGAGCAACACTAACAGGAAC  
 AATCCTCAATACCGCCCTGTTGTTCTTGAGTGGTCCATTGATGGTGGCTACTGTGAGGAG  
 GCGAATCCGCTTTCATGTCAATGCCTGCAAGGAGAATCCTACTGCTATAACTCATCAAT  
 GGAATGGATACCGCTGCAATGCTCCCTGGGTTTCAGGGGAACCCTTACTTGCAAGGG  
 CCCGATGGATGCCAAGGTAACGAATACATTATGCTAGTTACCTCAGCTTATGTTTCTTG

OsWAKs-Supplemental Data 1[1].txt

AATTTAGTAGTCAGCAAGAATAGCTCATGCCTGATTTTCGTCTGGTTTCATGTGATTTTT  
TATAAGATATTGATGAATGCACCATTAAGAGGCCATGCACGCATAAGTGCATCAACACGA  
AAGGGAGTTTCTACTGCATGTGCCAGCAGGGATGAGAGGTGATGGCTTGAAGGAGGGCA  
GTGGCTGCAATGGAATTGGCACACTGTTGATTGGAATAGGCAAGTTTCTGAAGCCCTGTA  
TCACTGCCTTGCCATGTGAATGATGAATCATTCAATTTGAAGGCTTGAGTTGATTAATG  
CTGCATCCAGTAGAGATCCCTGAATTTTCTGTGTCTGTGCAGTTACTGGACTAGCTCTGC  
TACTGCTTCTCCTTGTCTCATATTCTGGACCCATTGGCTTGTTAAGAAGAGAAAACTTG  
CGAAGATAAGACAGAGATACTTTATGCAGAATGGTGAATGTTGCTGAAGCAGAAGATGT  
TTTCTCAAGGTGCACCACTGCGGATATTTACTTCTAGTGAACCTTGAGAAAAGCAACCAACA  
GCTTCAGTGATGACAATATCATTGGTCGAGGTGGATTTGGGATCGTGTACAAAGGTATAT  
TATCCAATCAAATGGTTGTGGCAATCAAGAAGGCGCAGCGAGTTGATCAGAACCAAATGG  
AACAATTCATAAACGAGTTGGTCATTCTTTCACAAGTGAACCACAAGAATGTGGTCCAGC  
TATTAGGCTGTTGTCTTGAGACAGAACTTCCCTTGTTAGTTTATGAATTCATCACCAATG  
GGGCCCTTTTTCTCATCTTCAAAATACATCTGTCTGATTTTCATGGGAGGACCGCCTAA  
GGATTGCAGTTGAAACTGCATCAGCACTTGCATACTTACACTTAGCTACAAAGGAACCAA  
TTATTCACAGGGATGTCAAGTCATCAAACTACTCCTTGACGAGAACTTCACTGCAAAGG  
TGTCTGATTTTTGGTGCCTCGAGGCCAATACCACACAACCAGACCCATGTGACAACCTTAG  
TGCAGGGGACATTGGGGTACATGGACCCTGAATATTTCCAAACAAGCCAGCTAACTGAGA  
AGAGTGATGTATACAGTTTTGGGGTGGTTCTTATCGAGCTATTGACAAGACAGAAACCTA  
TATCTGATGGTAGGACAGATGATGTGAGAAATCTAGCATGTCAATTTAGTATGTTATTCT  
ATCAGAACCGTGTGGGAAATTTAGATTCTCAAGTAGCTGAGGAAGCTGGCAGCAAAC  
ATGTTAAACCGTTGCACAATTGGCTTTACGATGCTTAAGGTCGAGAGGTGAAGAGAGGC  
CAAGGATGATAGAGGTGGCAATTGAACCTGAAGCTCTGAGAAGGCTGATGAAACAACACT  
TGGTCTGCAGACCGAAGAAGACCCTCTGCTCTGCGAATCAGGTGAGCATGCAGATGTAA  
ACATCGAAGCATCCTCCGAGTTTGAGCCTTGA

>OsWAK53a gi |37988171|dbj |AK111508.1| Oryza sativa (japonica cultivar-group) cDNA  
clone: J013001F05, full insert sequence

TATTTTGAAGTAACGTGCCCAAGTGGTTCTCAGGTTGTGAGCCTGTGACCTATTTAACCTCCGATTTCCA  
GTCCATTCTCCTCCATGATCCAACTTTCCATCCTAGTTGATAGCAGTATTGCCATGGTCTATTTTTTCT  
TGTTAAAGACTAATGGCAAAGATGATGCTTTACCTTCTTCTCCTGCCATTGCTCCTCCTCATGTCATCT  
TTGCATCTTATGTTTCATTCGATGGAATCAAGCACCTCCAAGTGTCTCAATATTTCCATCCCTTATCCCTT  
TGGTATTTCTGGTGGGAACCTTGCCCGAGCCCAAGGGTTTGAGATCACATGTGCCTCATCTGGCCCGATG  
GTACGCATTAACAATATCATGTTTGGGATTCTTAACATCTCGTTGCTGGATGGTTTTGTAAGCATCTTGG  
CCAGTGCCACTTCTCAGCAGTGCAAAAGGAATTCTAGCTTCAGCCTTGAGGGGACCAATTTACGTTCTC  
AGATACAAGAAACAAATTTACAGCTCTGGGTTGTGATATGGTAGCCATGCTATTGAACGGTAGCAGCGGG  
TATAGCGGTGGCTGTGCTTCTTTTTGCTCCACCAAAAGCAATATAATTGATGGTATGTGCTCTGGCGTGG  
CTTGTGCGCAACAGCAGTACCGAAGGGTTAAAGAAGCTTGAGTTGGAGTTCACTAACATAACTGGGCA  
GCTCAGCAGGCCCAAGGAGGTGCTTCAATACTCCAACATGTGGCGAGGCTTTCATCGTGGAGCAGAACTCC  
TATGTTTTCTCTAGTGTGATCTGAGCAACACTAACAGGAACAATCCTCAATACCGCCCTGTTGTTCTTG  
AGTGGTCCATTGATGGTGGCTACTGTGAGGAGGCGAACCGCTTCATGTATATGCCTGCAAGGAGAACTC  
CTACTGCTATAACTCATCAATGGAATTGGATACCGCTGCAATTGCTCCCTTGGGTTTACGGGGAAACCT  
TACTTGCAAGGGCCCGATGGATGCCAAGATATTGATGAATGCACCATTAAGAGGCCATGCACGCATAAGT  
GCATCAACACGAAAGGGAGTTTCTACTGCATGTGCCAGGGATGAGAGGTGATGGCTTGAAGGAGGG  
CAGTGGCTGCAATGGAATTGGCACACTGTTGATTGGAATAGTTACTGGACTAGCTCTGCTACTGCTTCTC  
CTTGTCTCATATTCTGGACCCATTGGCTTGTTAAGAAGAGAAAACTTGCGAAGATAAGACAGAGATACT  
TTATGCAGAATGGTGAATGTTGCTGAAGCAGAAGATGTTTTCTCAAGGTGCACCACTGCGGATATTTAC  
TTCTAGTGAACCTTGAGAAAGCAACCAACAGCTTCAGTGATGACAATATCATTGGTCGAGGTGGATTTGGG  
ATCGTGTACAAAGGTATATTATCCAATCAAATGGTTGTGGCAATCAAGAAGGCGCAGCGAGTTGATCAGA  
ACCAAATGGAACAATTATAAACAGTTGGTCATTCTTTCACAAGTGAACCACAAGAATGTGGTCCAGCT  
ATTAGGCTGTTGTCTTGAGACAGAACTTCCCTTGTTAGTTTATGAATTCATCACCAATGGGGCCCTTTTT  
TCTCATCTTCAAAATACATCTGTCTGATTTTCATGGGAGGACCGCCTAAGGATTGCAGTTGAACTGCAT  
CAGCACTTGACATACTTACACTTAGCTACAAAGGAACCAATTATTCACAGGGATGTCAAGTCATCAAACAT  
ACTCCTTGACGAGAACTTCACTGCAAAGGTGTCTGATTTTGGTGCCTCGAGGCCAATACCACACAACCAG  
ACCCATGTGACAACCTTGTGAGGGGACATTTGGGTACATGGACCCTGAATATTTCCAAACAAGCCAGC  
TAACCTGAGAAGAGTGATGTATACAGTTTTGGGGTGGTTCTTATCGAGCTATTGACAAGACAGAAACCTAT  
ATCTGATGGTAGGACAGATGATGTGAGAAATCTAGCATGTCAATTTAGTATGTTATTCTATCAGAACCAG  
TTGTTGGAAATTGTAGATTCTCAAGTAGCTGAGGAAGCTGGCACGAAACATGTTAAACCGTTGCACAAT  
TGGCTTTACGATGCTTAAGGTCGAGAGGTGAAGAGAGGCCAAGGATGATAGAGGTGGCAATTGAACCTTGA  
AGCTCTGAGAAGGCTGATGAAACAACACTTGGTCTCTGCAGACCGAAGAAGACCCTCTGCTCTGCGAATCA  
GGTCAGCATGCAGATGTAACATCGAAGCATCCTCCGAGTTTGAGCCTTGATAACATTACCAAGGAGGAG  
GAAAGCATGGACACCACTTACTCCATTACGGGCCCTCTCATGTTAGTCTCCAGCACAAATGGTTTTT  
CCCTTAGTTATTATAACTCAGTCCCCAGTTTTCATGACAATGATTTTCTGTGTTGCTCTGAGCTGCCAATC



OSWAKS-Supplemental Data [1].txt  
ATGTAGAAACCCAGAGACGGGTATACTAGGAATAATTGGAGAGTGTGTGTCGAACTCCAATGTCTGTTCAA  
CTATTTCTCAGAGAGAAAATATCTGATCCTTTTCAGAAAGTCAATTTGGTCTTAAACATGGTGGTTAAAGTAAT  
TCATTTGGAATGTACCAAACTTTATAAAGAAATGATAGGTTAGTTTCCC

GATAGTGCCTTTTCAAGCTATCCCCTATGGCCCTATCCCCCTCTCTCCTCCTCCGGCCACACACCATTTCCGCGCATATCCACCACCGCCTCCTCAGCCGAGGTGAAAGCGGCCGCCATCCCAGCCCCAGCCCCCTCCCCCCCCCCCTCTCTCTCTCTCTCCTCGCCATCGCCGCCGAGAGGGGCTTATTCGATGCCGGATGGGGGAGCGCCGGGCGCCGGCCAGGCGGGCGGGGTCCGAGGCGGACGAGGGAGCGGGTAATCAATCTCCCTACGGCCC

TGAACCTGCAGTGGTTGGCGGGCTCCGCCTCCCGCGAGTTGAGGCCGATGAGGTGACGTGACGAAGCTGTGGCCGTGTGGAGTTGCTGTGTCTGACGCTGACGGCAAGGTAAAGGATAGTTTCAGTCTATACAAAAAGACAATTAGCCCGCGTATAAGATGGAAAAATTTAGCGCTCGATGCTTCGATTGGTAGGCAGCCTTGAGATTGTAAACAGATGGCCATTGTCTGTTGTGTGACGTAGTAAAATTTAGTTAAGACTTAAGCTTATTCATGTTTTCATCAGTCTGAAACCAAACATTTTCTGTTTTAACGTCAACCCGGCTGTTTTCGCCCGGTCAAAAAATATGATATATTCATATTTCTTGAGCCCCATGCACCTGGGGAAGAGAGTGCTTGCATCATATGTCTCCATCTTAGC

AAAGATGCTTTCAGCAAGCTACCGCTTAGTCAAGGGCAATATGACAAACAAGTAAAAAGGATAGGCCA

AAAAAATTGCTTGTGTAGCTTTTTCTGCCATTCTTGACCTTCCCCCTTGAATATTTTGAGTAACGTGCC

CAAGTGGTTCTCAGGTTGTGAGCCTGTGACCTATTTAACCTCCGATTTCTGTCCATTCTCCTCCATGATCCAACTTTCCATCCTAGTTGATAGCAGTATTGCCATGGTCTATTTTTCTTGTAAAGACTAATGGCA

AAGATGATGCTTTACCTTCTTCTCCTGCCATTGCTCCTCCTCACATGCATCTTGCATCTTATGTTCAATCGATGGAATCAAGCACCTCCAAGTGCTCCAATATTTCCCATCCCTTATCCCTTTGGTATTTTGGTGGGAA

CCCTGCCCAAGCCCAAGGTTT

GAGATCATATGTGCCTCATCTGGCCGATGGTAGCATTACAATATCATGTTTTGGGATTTAAACATCTCGTTGCTGGATGGTTTTGTAAGCATCTTGCCAGTGCCACTTCTCAGAGTGCAAAAAGGAATTTAGCTT

CAGCCTTGAGGGACCAATTTACGTTCTCAGATAACAAGAAACAAATTTACAGCTCTGGGTTGTGATATGGTAGCCATGCTATTGAACGGTAGCAGCGGGTATAGCGGTGGCTGTGCTCTTTTTTGCCACCAAAGCAATATAATTGATGGTATGTGCTCTGGCGTGGCTTGCTGCCAAGCACCAGTACCGAAGGGTTAATGAAGCTTGAGTTGGAGTTCACTAACATAACTGGGACGCTCAGCAGGCCCAAGGA

GGCTAATAATACTCCAACATGTGGCAGGCTTTCATCGTGAGACGAACCTCTATGTTTTCTAGTGTTGATCTGAGCAACACTAACAGGAACAATCCTCAATACCGCCCTGTTGTTCTTGAGTGGTCCATTGATGGTGCTACTGTGAGGAGGCGAACCGCTTCATGTCATATGCCTGCAAGGAGAAGCTCTACTGCTATAACTCATCAAATGGAATTTGGATACCGCTGCAATTGCTCCCTTGGGTTTTCAGGGGAACCTTTACTTGCAAGGGCCCGATGGATGCCAAGGTAACGAATACATTCATGCTAGTTACCTCAGCTTATGTTTTCTGAATTTAGTAGTCAGCAAGAATAGCTCATGCCTGATTTTCGTGTTTTCATGTGATTTTTTATAAGATATTGATGAATGCACCATTAAGAGGCCATGACGCGATAAGTGCATCAACCAAGGAAGGAGTTTCTACTGCATGTGCCAGCAGGGATGAGAGGTGATGGCTTGAAAGAGGGCAGTGGCTGCAATGGAATTGGCACACTGTTGATTGGAATAGGCAAGTTTCTGAAGCCCTGTATCACTGCCTTGCCATGTGAATGATGTAATCATTCAATTTGAAGGCTTGAGTTGATT

AATGCTGCATCCAGTAGAGATCCCTGAATTTTCTGTGTCTGTGTCAGTTACTGGACTAGCTCTGCTACTGCTTCTCCTTGTCTCATATTTCTGGACCCATTGGCTTGTTAATAAGAGAAAACTTGCGAAGATAAGACAGAGATACCTTTATGCAAGATGGTGAATTTGCTGAGCAGAAGATGTTTTCAAGGTACACCACTGCGGATATTTACTTCTAGTGAACTTGAGAAAGCAACCAACAGCTTCAGTGAATGACAATATCATTGGTCGAGGTGGATTTGGGATCGTGTACAAAGGTATATTATCCAATCAAATGGTTGTGGCAATCAAGAAGGCGCAGCGAGTTGATCAGAACCAAATGGAACAATTCATAAACGAGTTGGTCATTCTTTCACAAGTGAACCACAAGAATGTGGTCCAGCTATTAGGCTGTTGTCTTGAGACAGAAGCTTCCCTTGTAGTTTTATGAATTCATCACC

AATGGGGCCCTTTTTTCTCATCTTCAAAAATACATCTGTCTGATTTATCATGGGAGGACCGCCTAAGGATTGCAGTTGAAAC

TGCATCAGCAGCTTGCACTACTACACTTAGCTGAAAAGAACCAATTTACAGGGATGTCAAGTGCATCAACATACTCTTGACGAGAAGCTTCACTGCAAAAGGTGCTGATTTTGGTGCCTCGAGGCCAATACCACACACACAGACCCATGTGACAAGCTTTAGTGCAGGGGACATTGGGGTACATGGACCCTGAATATTTCCAAACAAGCCAGCTAACTGAGAAGAGTGATGTATACAGTTTTGGGGTGGTCTTATCGAGCTATTGACAAGACAGAAA

CCTATATCTGATGGTAGGACAGATGATGTGAGAAATCTAGCATGTCAATTTAGTATGTTATTCTATCAGAACCAAGTTGTTGAAATTTAGATTTCTCAAGTAGCTGAGGAAGCTGGCAGCAAGTGTGCAAGTGTGAGAGGAGCCCAAGGATGATAGAGGTGGCAATTTGAATCTGAGGCTTGAGAAAGCTGATGAAACAACACTTGGTCTGACAGACCGAAGAAGACCTCTGCTCTGCAATCAGGTGAGCATGCAGATGTAAACATCGAAGCATCCTCCGAGTTTGAGCCTTGATAACATTACCAAGGAGGAGAAAGCATGGACACCATTCTACTCCCATTCAGGGCCCTCTCATGTTAGTCTCCAGCACAAATGGTTTTCCCTTAGTTATTATAACTCAGTCCCCAGTTTCATGACAATGATTTTCTGTGTTGCTCTGAGCTGC

CAATCATGTAGAAAACCCAGAGACGGGTATACCTAGGAATAATTTGAGAGTGTTGTCGAAGCTCCCAATGTCTGTCAACTATTTCTCAGAAAGAAATCTGATCTTCTCAGAAGTCAATTTGGTCTTAACATGTTGTTAAAGTAATTCATTTGGAATGTACCAAACTTTATAAAGAAATGATAGGTTAGTTCCCAATGTGC

Page 89

OsWAKs-Supplemental Data 1[1].txt

GGCATTGGCCACGGCTGCTTCCGCGATGGCTTCGAGCTCGCCTGCGACGAGACGCACCCT  
GCTGCACCACCGAAGCTGCGTTTCGCAAGAAACGGCGTGAAGTGATCGACATCTCCCTG  
CCGTCCGGCACGGTGAGAGTCGCCACCAGGATGCTGGGCACGGACTCCTCGTCGTCGCTG  
CCGCGGCAGCTCAACGGCTCGTGGCCGGCCGGCCTGCCGGCAAATGGCTCCCTGGCGGTG  
TCGACCAGGCACAACCGTTTCGTGCGCATGGGCTGCAACCTCCTCGCCAACCTCGTCGCC  
AACGACGACGACGACTACATCAGCGTCTGCGCCGCGCTGTGCGTGGTCCGATCCGCGCTG  
CCGAGGGACGCCGCCGCCGCTCAAGCTGCTCCGGCTTCGGCTGCTGCCAGACGCCGGTG  
GCGAGGGGCTCCCGTCTACGGCGTCCACCTCAACGACCTGACCCAGAGGTGGTCACC  
GTGGGGTCGTACGGGGCGGGCGTTTCATCGCCGACGGCGAGTGGTTCGCCGGCGAGCAACGC  
TCCCTGCAGCTCGGCTTCGTGCTGACCCGCGGAAGCTGGCCGACTCGACGGCGGTCCCG  
ACGGTGCTGGAGTGGTCGCTGGACATGGACCGCGATCAGGACATGTTCTGGTACGACACC  
AGGGTCTCTCAATGGACGCGATGTGTGACGCTGCACAGCGCCATCGACGACGCTGTTGAC  
GGGAACCTTTACGGCCGAGCAGCGTGCAATTGCTCCAAAGGATACGAGGGAAACCTTAC  
CTAGCCAATGGATGCCAAGGTATGTACAGACTACAGTTCAGCGATTAATTACCCGACGAT  
TAGTTAGTTAAATATACAATCTGAAAGTTTTTCAACCAAAAAAAGTGTGTGTACTATAGT  
TACTCTTTTGATGGACCAGATTGTGGTCCATGTGTGGATGGGCCAGATTGTGAATAA

>OsWAK54, 5380.t00019, Chromosome 4, post-processing

ATGGTTGTTGTTGTTGTTGGGGCTCTGCTGTTTCATCTCGTAGTGACAGCATTGGCCGCG  
CCGTTAGCCTTGCTGGCTGCCCGGAGACCTGCGGCAACGTACCGTCCCTTACCCTTTT  
GGCATTGGCCACGGCTGCTTCCGCGATGGCTTCGAGCTCGCCTGCGACGAGACGCACCCT  
GCTGCACCACCGAAGCTGCGTTTCGCAAGAAACGGCGTGAAGTGATCGACATCTCCCTG  
CCGTCCGGCACGGTGAGAGTCGCCACCAGGATGCTGGGCACGGACTCCTCGTCGTCGCTG  
CCGCGGCAGCTCAACGGCTCGTGGCCGGCCGGCCTGCCGGCAAATGGCTCCCTGGCGGTG  
TCGACCAGGCACAACCGTTTCGTGCGCATGGGCTGCAACCTCCTCGCCAACCTCGTCGCC  
AACGACGACGACGACTACATCAGCGTCTGCGCCGCGCTGTGCGTGGTCCGATCCGCGCTG  
CCGAGGGACGCCGCCGCCGCTCAAGCTGCTCCGGCTTCGGCTGCTGCCAGACGCCGGTG  
GCGAGGGGCTCCCGTCTACGGCGTCCACCTCAACGACCTGACCCAGAGGTGGTCACC  
GTGGGGTCGTACGGGGCGGGCGTTTCATCGCCGACGGCGAGTGGTTCGCCGGCGAGCAACGC  
TCCCTGCAGCTCGGCTTCGTGCTGACCCGCGGAAGCTGGCCGACTCGACGGCGGTCCCG  
ACGGTGCTGGAGTGGTCGCTGGACATGGACCGCGATCAGGACATGTTCTGGTACGACACC  
AGGGTCTCTCAATGGACGCGATGTGTGACGCTGCACAGCGCCATCGACGACGCTGTTGAC  
GGGAACCTTTACGGCCGAGCAGCGTGCAATTGCTCCAAAGGATACGAGGGAAACCTTAC  
CTAGCCAATGGATGCCAAGATTGTGGTCCATGTGTGGATGGGCCAGATTGTGAATAA

>OsWAK55, 5380.t00020, Chromosome 4, pre-processing

ATGGCTCGGCAAGGCTTTCGCCCGCGATTCCCTGTCCAAACCCACACCACCAATCCGCAT  
GACGGATTAATTAAATTAATAAATTCGTCTCGCATTTTTAGGTGAGTTATGAAATTAG  
TTTTTTCATTCGTGTTTCGAAACTTCTTCCGACATCCGGTCAAATAAAATGTTTGATGTG  
ACATCTAAATTTTTTTTTTCGCGAACTAAAAAAGGCCCTAGTCACTAGTGTGGGAGGCGT  
TGACTGGACTTCGAAGCATATGAGATCAGGATAAAAAACCTTTGCTATATATATTCTCAT  
CAGCTGCTGTAACGGACTGAATAGAGGAGGCTGCTCTACTAGCCTAGTAGTAGTACTGTA  
GTATAGAGATAACTTGCACGCCGTCTTAGCGACGATTGGAGCAGTCGTGTTTCAGCTTC  
TGGTGACGACGACGACACTGTACGACGACGCCCGACCCCGATAGCCCTGCCTGGTTGCC  
CGGAAAGCTGCGGCGCATACAAGTGCCGTACCCTTTTCGGCATCGGCGACGGGTGCTCCT  
ACCATGGCTTCAACCTCACATGCGACGACGAGGCGCACCACCAGACGCCGCCAAGC  
TGTTTCATGGCCACAGACAACGGCACCGTCTGTCCTCAAGTGTCAACATCTCCTTGCCGACG  
GCACTGTACGCGTCCGACGCAAGCTTTCGCGATCATCTATTGCCGGCTCCTCCTCCTCCT  
CGTCTAATGCCTCGTCGTACGGTCCGACCTACCGGCCGACGGGCGGTTACGGTGTCCT  
CCGCGTATAACTGGCTGGTTGCCTTCGGCTGCAACATCGTGGCCGACCTTACCCCGTACG  
GCAATATCGCCGACGGCAGCAGCTGCGCCGCCACATGTATAGATGGATGGCAAAATTTTCG  
CAGGCCCTCGTGCTCCGGCATCGCGCGCTGCCGTACGTCCGTTGGGAGGGGTGTCCACT  
CGTACACGATCCAGGTCACGTCTCTGATAGACCGAAATTCATGGGTGCCTCGACATCGA  
CGACATGGGCAGCTGCGTTCGTAGCTGAGCAGGGCTGGTTCAGCGCGAATGAGAATGCCA  
TGTTGTACAACCTTCAACATTTGGCTGCCGTTACGGTCGAGAGTGTTCGGTGGTGCTGG  
AATGGTGGCTGGATTGATCCGTGATGGAGCCATACTGCCGTTGTGAGTTGGGCCCAATA  
CTACCGACTTTAGATGCCTAAGCTTGCATAGTTCAAGCTATTACAACGATCTAAACTACG  
ACCGAAGACGGTGCAACTGTTCCCAAGGATACGAAGGCAATCCTTACATCCGTGATGGAT  
GCCGAGGTATTTTTTTCTTTCCTGCTTTATTGTGTTTGTGTCAGCGAAGGCTCCAATTTT  
CATGTAAAAGAAAAGTTATACATATGGCCCGTCTTTTCTCATGAAGTTAGAGATTTTAT  
CTCGTTTTTCATTAGAGGAATTTTACGGTCTTGAATAAATACCTTAAGGTACCTAAAT  
TTTACACTAAAATTTTTTGGTACCTTGAAGTACTTAGTACCTAGAGGTATCAAATTTTACA  
CTAGAAAAATATGGTACCTCTAGTAACTTCTTAAGGATGGTAAATTAACCTTTTCATTA

OsWAKs-Supplemental Data 1[1].txt

GCACGTTTTTTAACTACTAAAGACGCATTTGGTGCGAAAACTTTCTATATAGAAGTTGC  
TTAAAAATCAAATATATCTATTTGTTAAATTTGTAATAATTAACCTTAATTAATTATGCG  
CTAATAGCTTTCTCGTTTTTCGTGCCCATATTTAATCTTAATCCACATCAGATTGGAACA  
CCACCATATATAGTATCACTTGATATAATTATATAGAACATGTAATTATATCATACTATC  
AGTTGATAGAAGCTACTTACCTCGTCCCAACTATAGCAACCTAAGATGAAATGAGACTC  
ATCCTATGATAACGAATCTGGACATGATGCATCCAATCATGAATTGCATTCTTTAATTTT  
CACTCCCATATATTTGTTCCCCTTTTCAGATATCGATGAGTGCCAGCAGCCAGATGTTTA  
TCCGTGTCATGGAACATGCATCAATATGCCTGGGACGTACCGATGCTTAGCAAAGAAAAG  
TGTCAAAAGCCTCCCAGGTACAAATGCAATTCCTCGCAAAAAAAGAAAAGAAAAAAGAA  
GAAGCAATCGATCACTTGCTCGATTCTATTAGCGGAGTTTTCGATTTTGAAGCTGATTT  
GTAGCCTTCAGGTACAAATACAGTTTCATTTGGATCCATTCTATACATTATAAACCTAT  
GTTCTGACGTTTATTCTCTGCAGGTTTAATAACCATTATAGCAGTTAGTGCTGGTTTTG  
GGCTACTGTTTTCACTTCTTGGTGTGGCAAAATCACAAATAAAATCAAACAACGCAGAG  
CCAAGAAGTTGAGACGGAAGTTTTCAAGAAGAATCATGGACTGCTTCTTCAACAATTAA  
TATCTTCAAACAAGGATATAGCTGAAAGGATGAAGATTTTCAGTTTGAAGAATTAGACC  
AGGCAACCAACAAATTTGATCAAAATCGCATTCTTGGGGCGGTGGCCATGGCACAGTCT  
ACAAAGGTATATTATCTGACCAACGTGTGGTGGCCATCAAAAAGTCAAAAATTGTGGTTC  
AAAGGGAGATTGATGATTTTCATAAATGAGGTTGTCATACTTTCAAAAACCTAACCATAGGA  
ATGTGGTGAAGCTATATGGTTGTTGCCTTGAGACAGAAGTTCCTTTATTAGTTTATGAGT  
TTATATCGAATGGAATCTTTTCATTTTCATTTGCGCAAAATGAGAATCCTTTGAAGT  
GGAAAGATAGATTGAGAATCGCACTAGAAACTGCAAGGGCTATTGCATATCTTCACTCGG  
CAGCTTCTATATCAGTGTTACATAGAGATATCAAATCTACAAATATACTACTCACTGATA  
CTATGACGGCTAAAGTATCGGACTTTGGAGCTTCAAGGTCAATTTCAATTGACGAGACAG  
GAATACTCACCATCATCCAGGGCACTTATGGTTATCTAGATCCTGAATATTATTACTCTA  
GTCGACTGACTGAGAAAAGCGATATTTATAGTTTCGGTGTCTCCTAGCTGAAGTATTGA  
CAAGGGTAACACCGGTTTTCTCCTCCGAAACATCAGAAAGGACAAGCCTGGCATCATACT  
TTGTGTCGTTTCATAAGAGACAACCGCTTGTCTAGATATTCTGGACTCTCAAATTGTTAATG  
AGGTGGGTGCTGAAGATGCTAAGGTGGTTGCTAAGCTTGCAGAAGCATGTTTAAGATTAA  
AAGGTGAGGAAAGGCCTACAATGAGGCAAGTGGAGACAACACTTGAAGATGTGCAAAGGT  
CAAAAGTCCAACCTTAATCATCAGATTGCAAGAGTGAGCAATAGTAATACACTAAAAAATC  
AGACGTACGAGGGAAGTAAGTGCTATGAAGGAAGTACAAATATAGCTTGGAAAAGGAGT  
TCATTCAATCATCTGAATTTCCAAGATAA

>OsWAK55, 5380. t00020, Chromosome 4, post-processing  
ATGGCTCGGCAAGGCTTTTCGCGCGGATTCCCTGTCCAAACCCACACCACCAATCCGCAT  
GACGGATTAATTAGGCTTAATAAATTCGTCTCGCGATTTTCAGCGACGATTGGAGCAGTC  
GTGTTTCAGCTTCTGGTGACGACGACGACACTGTCAGCAGCAGCCCCGACCCCGATAGCC  
CTGCCTGGTTGCGCGAAAGCTGCGCGGCATACAAGTGCCGTACCCTTTTCGGCATCGGC  
GACGGGTGCTCCTACCATGGCTTCAACCTCACATGCGACGACGAGGCGCACCACCAG  
ACGCCGCCAAGCTGTTTCATGGCCACAGACAACGGCACCGTCTGTTCAAGTGCTCAACATC  
TCCTTGCCGGACGGCACTGTACGCGTCCGACGCAAGCTTTTCGAGTCATCTATTGCCGGC  
TCCTCCTCCTCCTCGTCTAATGCCTCGTCTGTCACGGTCCGACCTACCGGCCGACGGGCCG  
TTCACGGTGTCTCCTCGCGTATAACTGGCTGGTTGCCTTCGGCTGCAACATCGTGGCCGAC  
CTTACCCCGTACCGCAATATCGCCGACGCGACGCTGCGCCGCCACATGTATAGATGGA  
TGGCAAAATTTTCGAGGCCCCCTCGTCTCGGCGATCGCGCGCTGCCGTACGTCCGTTGGG  
AGGGGTGTCCACTCGTACACGATCCAGGTACGTCTCTGATAGACCGAAATTCATGGGT  
GCCTCGACATCGACGACATGGGCAGCTGCGTTTCGTAGCTGAGCAGGGCTGGTTCAGCGCG  
AATGAGAATGCCATGTTGTACAACCTTACCAATTGGCTGCCGTTACGGTTCGAGAGTGTT  
CCGGTGGTGCTGGAATGGTGGCTGGATTTGATCCGTGATGGAGCCATACTGCCGTTGTCA  
GTTGGGCCCAATACTACCGACTTTAGATGCCTAAGCTTGCATAGTTCAAGCTATTACAAC  
GATCTAAACTACGACCGAAGACGGTGCAACTGTTCCCAAGGATACGAAGGCAATCCTTAC  
ATCCGTGATGGATGCCGAGATATCGATGAGTGCCAGCAGCCAGATGTTTATCCGTGTCAT  
GGAACATGCATCAATATGCCTGGGACGTACCGATGCTTAGCAAAGAAAAGTGTCAAAGC  
CTCCCAGGTTTAATAACCATTATAGCAGTTAGTGCTGGTTTTGGGCTACTGTTTTCACTT  
CTTGGTGTGGCAAAATCACAAATAAAATCAAACAACGCAGAGCCAAGAAGTTGAGACGG  
AAGTTTTTCAAGAAGAATCATGGACTGCTTCTTCAACAATTAATATCTTCAAACAAGGAT  
ATAGCTGAAAGGATGAAGATTTTCAGTTTGAAGAATTAGACCAGGCAACCAACAAATTT  
GATCAAAATCGCATTCTTGGGGGCGGTGGCCATGGCACAGTCTACAAAGGTATATTATCT  
GACCAACGTGTGGTGGCCATCAAAAAGTCAAAAATTGTGGTTCAAAGGGAGATTGATGAT  
TTCATAAATGAGGTTGTCATACTTTCAAAAACCTAACCATAGGAATGTGGTGAAGCTATAT  
GGTTGTTGCCCTTGAGACAGAAGTTCTTTTATTAGTTTATGAGTTTATATCGAATGGAAC  
CTTTCTATTCTATCTTACGCGCAAAATGAGAATCCTTTGAAGTGGAAGATAGATTGAGA  
ATCGCACTAGAAACTGCAAGGGCTATTGCATATCTTCACTCGGCAGCTTCTATATCAGTG

OsWAKs-Supplemental Data 1[1].txt

TTACATAGAGATATCAAATCTACAAATATACTACTCACTGATACTATGACGGCTAAAGTA  
TCGGACTTTGGAGCTTCAAGGTCAATTTCAATTGACGAGACAGGAATACTCACCATCATC  
CAGGCAGCAACCCCTGGAGTCGCCGGAGGTAATGGGCTCTTGCATACAATCCCTTCCAAA  
AGCGATATTTATAGTTTCGGTGTCTCCTAGCTGAACATTGACAAGGGTAACACCGGTT  
TTCTCCTCCGAAACATCAGAAAGGACAAGCCTGGCATCATACTTTGTGTCGTTTATAAGA  
GACAACCGCTTGTCTAGATATTCTGGACTCTCAAATTGTTAATGAGGTGGGTGCTGAAGAT  
GCTAAGGTGGTTGCTAAGCTTGCAGAAGCATGTTTAAAGATTAAGAGGTGAGGAAAGGCCT  
ACAATGAGGCAAGTGGAGACAACACTTGAAGATGTGCAAAGGTCAAAGTCCAACCTTAAT  
CATCAGATTGCAAGAGTGAGCAATAGTAATACACTAAAAAATCAGACGTACGAGGGAAGT  
AAGTGCTATGAAGGAAGTAGACAATATAGCTTGGAAAAGGAGTTCATTCAATCATCTGAA  
TTTCCAAGATAA

>OsWAK56, 2968.t00014, Chromosome 5, pre-processing

ATGACCTCCAATATCACACTTGTCTTCTTGTGATGATGTGCTTGGCAGCGGAGTAGCA  
GCAGCAGCAACCCCTGGAGTCGCCGGAGGTAATGGGCTCTTGCATACAATCCCTTCCAAA  
AACTCTCTGGCTCACTGCCCTTCTACCTGCGGCGACATTGGCTTCTCTACCCATTTGGG  
ATCGGCCATGGCTGCTTCCGGCAAGGTTTCGAGCTCATCTGCGACAACACCACTCATCCT  
CCCACACTGCTCCTGGCAAACACTACAACCTAAGGTCATCGGCCAATCAGGCCGGACACTA  
GAGGTGATAGAAATCCCAGCCATTGCCTTCAACATCGCGATGAACAACAGCAGCATCATC  
GACTACATCCGACTACTGGGTTTCTCCTGCCAATGGTTTACCATCGTGAACGAGAGCACC  
CTGTTTCGTTATCGGATGTGGGATCGAGGCGTGCCTGTTTCGATCTTGACACGAACGAGACC  
ATGGGTTCTTGCATCACCATGTGTTCTGACAATTTGGGGATCATGGAGATGCACGATGGG  
GATTGTACCGGCATCGGTTGCTGCCATATCATCGTGAGAAGGGAGCTGCGTCGGTTTTGG  
TTAAAGCTTGATCATCCGGATGATAGAACACACCGCGATCATATCGGGTGTGCTCGT  
GCTCAGGTTTTCTCCTGCCAACAATTAACAGCTATCAATTCAATACGAATGATCTTGTT  
TCGTCCAGCTGGATGAACACGAGCTCCATTGGTGGTACTCTTCTCCGTGGTGCCATCATG  
GACCAGGAGACTTGTCCAGGTGCATCAGCGAGCAAAGCAACCTATGCTTGCACCACTAAC  
ACCAATTGCTTCAATGCTACAAATGGAGGATATTACTGTTCTGCGCAATGATGTCACC  
GATGGCAATCCTTACGTTAACCTTGGCTGCAGTGACGACCCTGGTACGACTTATATATAT  
TCTTTTTCTATGTATGCATATTACCCGTGCGCTGCAATAGGATTCTAATTAGATAAAATT  
ATCATTGACCCGATATTACCATATTTTTTACAAATATTATTTCTTAATTTCTGTCCTTT  
GATCGCACACTATCCTTTTTCTTTCAAACGAAAAGTACAAAGTTGCAGGTGGTGGTTG  
ACATGTGGGCCCTTTGTCTTAATAGTGTAATTTTTCCCTTTCAAATAAAAAGTAAGTTGGT  
GATGGGGGTGGTGGTAGATTACCACTACTCCATTCTAAAGGTCCATTTTAAAGGAGTAT  
AGATGTTCTATTTTTGTATTGCCTAGTGCCATGCATGTGCATTGTAACAGGATTGGAATT  
ATGAGGTTTAGTTTTTCCCTTTTTTGGTTGATTTTTTCGTGTAGAAACTGGTTTTAGGTG  
GGTGGCTATTTTTAGTGTGCGGATTTTTAAGTGGGGAAGTATGATGGTGGAAAAGGAAAA  
AGGACAATCTGTTTTCAAAGTAGTAAATTTATAAGAATCAACTAAGTGAGATACCCTAG  
ATAACATATATACTACATAGTAATAGAAACAGTAAGGCACACATTGGTAATCTTTCTATA  
TACTAATTTAGAAACCCATGGAGGAGAGAGAAAAGTAAGGCCAGCAACTTTATTCTAGAT  
GGTTCAGAAAGGCTAGAAGAATCTCATTATTAATAAGAAATTTTTATAATTCTCATATTG  
ATCAAGAAAACCTAGATACATAACACATCCAATTTGTTTTACTAATGATGAACCCATGCA  
TCCACATGATGAGCTACTACCATTGTAGAAAACATTTTTAAGCATTAGAAATAATACATA  
TTTTGATGTTGCAATTTCAAAGTTTACAGATATTATGCTTGCATATGGGGCAAGAAATT  
CTGAAGGGAGAGTCTATTTTTAGGATGTTGGTTTTCCCAAGTCCAGTTTTCACTCTATA  
CTAACAAATCATTCTTTTTTTACACATATATTTCAAATCGGACCAGATATCAACCCAA  
CGTGAGCTAATCTCACAATGCTCCAAACAGTGTCGTGCTTATCTCCTCTTGGATCTGGCA  
AGAGTTCACATGCCATCTTTAAAGATAGAGTTTTCATATGCACATTTTTTAATGTTCTAG  
ATTTTCAAATGATTAATGTCAATTTTAACTTGTAGAACTTCTAGACTTTCAAATTAATGT  
TGAAATCTACTTTTTGTTACCTACTGGTATTAATATAGGAGCATGCAGGAGAATATAGTAA  
AGGGTGAAGATGGATTGCTTTATTCATTTCAATAACCAGCATACTGCACATAATTGTTAC  
TGATGTATGGATTCTCCAGCTCCAATGTTTGTGTTTTTCTTCCAAAAAAGAAGGGAGTTG  
GTGGTGGGGGTGGTTGAACATGTGATCCTCTGGTCTACAGTTTTTTTTTCTTTTCCAC  
AAAAGTAGCAAGTTTGTGGTGGGGGTGGTGGCAACACTACTTTCTTTTAAAAGAATATAG  
ATTATACAGTTCTAATATTATAGACATGCCATACTGCGTATACTCGCACTTACTAACACT  
GGGATACACAACATACCTATTTTTATGGGTAAAGGTATTACTAAGTATGGATAAATATATA  
ATTTTCATCCACTTAAGAAAGGACCATGTAGTAATTTCTTTATCACGATGTTTTACCTTTGG  
CTAAGTTTTGTCTATGTACTTGAACCCCGATATTTGTCTCTAAAATTAATAGGTTCCAC  
TTTGTTTTTTTTGCTTCCCTACTATTTACAGATATTGAGTGTTTAAACAAAAGGAAAATGTA  
CGGCATCAGCTAAGAGACACAATCTTATTGTAGGTAGGTCACTTCAAACAAAATATATTC  
AAGTATAATTCATAAAATGCATGACGTCTTCATGAATACAAGTGTTATTGGATGAACAGG  
TATAACAATTTGAATGGGTGGCCTTGGCTCAATCATTCTTGCACTCGGTGCAATAGT  
ACTAATCAACAAGTGAAGAGAGGTGTACAAAAGAGAATTGGAAGGGCACACTTCAAGAA

OsWAKs-Supplemental Data 1[1].txt

AAACCAAGGCCTACTCTTGAACAATTGATATTAGATGAAAAAGCACAAAGATAAAACAAA  
GATATTCTCCTTGGAGGAAGTACAGAGAGGCAACGAAGTACTTTGATGCTACTCGTGTACT  
TGGCTCTGGAGGGCATGGCACAGTTTACAAAGGGATTTTGTCCAATCAATGCATAGTAGC  
CATTAATGTCCAAATAGCGGAGCAACAGAGATAGATCAATTTATCAATGAAGTTGC  
TATATTATCGCAAATCATTATCGCAATGTGGTAAAGCTTTTTGGGTGTTGCTTGAAGC  
AGAGGTGCCTTTATTGGTGTATGAGTTCATATCCAATGGGACACTATATGATATTCTTCA  
CAGTGATGTAAGTGTTAAATGCTTGCTATCATGGGATGACCGTATTAGGATTGCAGTAGA  
AGCCGCAGGAGCTCTTGCTTACCTACACTCAGCTGCAGCAATCCAATTTACCATAGAGA  
TGTCAAATCTTCTAATATATTGTTGGACGACAACCTTTACTACAAAGGTTTCTGACTTTGG  
AGCTTCAAGAACCATGTCATTTGATCAAACCTCATGTTATGACAAATGTACAAGGCACATT  
TGGTTACTTAGATCCAGAGTACTACTACACTGGCCAATAACAGCGAAGAGTGATGTCTA  
TAGTTTTGGAGTTATACTTGTGCGAGCTTCTAGTAAGAAAGAAGTCGATTTTTATAAATGA  
CCAAGGTACAAAACAAAGCTTGGCTCATTACTTTGTGGAAGGGCATCAACAAGGAGTAGT  
CATGGAGATCTTGGATTGCAAGTTATGGAAGAGGCAACCGGGAAGAAATTGATGAAAT  
TGTCTCAATTGCAGAATCATGCTTGAAAAACAAAAGGAGAAGAGAGACCTACCATGAAAGA  
AGTAGAAATGAGGTTGCAGTTTGTGTAAGTATAAGACAAAGAAAGTGCCAACAATTTCC  
AGTAACAGAAGGAGAAATTGAGCATTTCCATTCCCAATACTAGTAACCTTTCAGATGG  
CAGGTTTCAGCCATTCTACTGGTTTAACTTGCAGCTCTGTCTCTGGAAGTTACAGCTTGGG  
GCAACAATTTTCTTCATCAATCAATTTGCCACGATAA

>OSWAK56, 2968. t00014, Chromosome 5, post-processing  
ATGACCTCCAATATCACACTTGTCTTCTTGTGATGATGTGCTTGGCAGCGGCAGTAGCA  
GCAGCAGCAACCCCTGGAGTCGCCGGAGGTAATGGGCTCTTGCATACAATCCCTTCCAAA  
AACTCTCTGGCTCACTGCCCTTCTACCTGCGGCGACATTGGCTTCTCCTACCCATTTGGG  
ATCGGCCATGGCTGCTTCCGGCAAGGTTTCGAGCTCATCTGCGACAACACCACTCATCT  
CCCACACTGCTCCTGGCAAACTACAATAAGGTCATCGGCCAATCAGGCCGAGACTA  
GAGGTGATAGAAAATCCAGCCATTGCTTCAACATCGCGATGAACAACAGCAGCATCATC  
GACTACATCCGATACTGGGTTTCTCCTGCCAATGGTTTACCATCGTGAACGAGAGCACC  
CTGTTCTGTTATCGGATGTGGGATCGAGGCGTGCCTGTTGATCTTGACACGAACGAGACC  
ATGGGTTCTTGCATCACCATGTGTTCTGACAATTTGGGGATCATGGAGATGCACGATGGG  
GATTGTACCGGCATCGGTTGCTGCCATATCATCGTGAGAAGGGAGCTGCGTCCGTTTTGG  
TTAAAGCTTGATCATCCGGATGATAGAACACACCGCGATCATATCGGGTGTGCTCGT  
GCTCAGGTTTTTCATCCTGCCAACAATTAACAGCTATCAATTCGAATACGAATGATCTTGT  
TCGTCCAGCTGGATGAACACGAGCTCCATTGGTGGTACTCTTCTCCGTGGTGCCATCATG  
GACCAGGAGACTTGTCCAGGTGCATCAGCGAGCAAAGCAACCTATGCTTGCACCACTAAC  
ACCAATTGCTTCAATGCTACAAATGGAGGATATTACTGTTCTGCCGCAATGATGTCACC  
GATGGCAATCCTTACGTTAACCTTGGCTGCAGTGACGACCCTGGTATAACAATTGGAATT  
GGGTGTGGCCTTGGCTCAATCATTCTTGCACTCGGTGCAATAGTACTAATCAACAAGTGG  
AAGAGAGGTGTACAAAAGAGAATTGGAAGGGCACACTTCAAGAAAAACCAAGGCCTACTC  
TTGGAACAATTGATATTAGATGAAAAAGCACAAAGATAAAACAAAGATATTCTCCTTGGAG  
GAAGTAGAGAAGGCAACGAAGTACTTTGATGCTACTCGTGTACTTGGCTCTGGAGGGCAT  
GGCACAGTTTACAAAGGGATTTTGTCCAATCAATGCATAGTAGCCATTAAATGTCCAAA  
ATAGCGGAGCAAACAGAGATAGATCAATTTATCAATGAAGTTGCTATATTATCGCAAATC  
ATTCATCGCAATGTGGTAAAGCTTTTTGGGTGTTGTCTTGAAGCAGAGGTGCCTTTATTG  
GTGTATGAGTTTCATATCCAATGGGACACTATATGATATTCTTCACAGTGATGTAAGTGTT  
AAATGCTTGCTATCATGGGATGACCGTATTAGGATTGCAGTAGAAGCCGAGGAGCTCTT  
GCTTACCTACACTCAGCTGCAGCAATCCAATTTACCATAGAGATGTCAAATCTTCTAAT  
ATATTGTTGGACGACAACCTTTACTACAAAGGTTTCTGACTTTGGAGCTTCAAGAACCATG  
TCACTTGATCAAACCTCATGTTATGACAAATGTACAAGGCACATTTGGTTACTTAGATCCA  
GAGTACTACTACACTGGCCAATAACAGCGAAGAGTGATGTCTATAGTTTTGGAGTTATA  
CTTGTGCGAGCTTCTAGTAAGAAAGAAGTCGATTTTTATAAATGACCAAGGTACAAAACAA  
AGCTTGGCTCATTACTTTGTGGAAGGGCATCAACAAGGAGTAGTCATGGAGATCTTGGAT  
TCGCAAGTTATGGAAGAGGCAACCGGGAAGAAATTGATGAAATTGTCTCAATTGCAGAA  
TCATGCTTGAACAAAGGAGAAGAGAGACCTACCATGAAAGAAGTAGAAATGAGGTTG  
CAGTTTGTGTAAGTATAAGACAAAGAAAGTGCCAACAATTTCCAGTAACAGAAGGAGAA  
ATTGAGCATTTCCCATTTCCCAATACTAGTAACCTTTCAGATGGCAGGTTTCAGCCATTCT  
ACTGGTTTAACTTGCAGCTCTGTCTCTGGAAGTTACAGCTTGGAGCAACAATTTTCTTCA  
TCAATCAATTTGCCACGATAA

>OsWAK57, 4374. t00003, Chromosome 5, pre-processing  
ATGCTCACCAAGGGCGGCGAGACTGCAACGGGGAAGCCGGCGGCGGGCTCCTCG  
GGGAGGCAACGGTGGTCCGGTGGCGTACCAGGCGCGAGGCGGCGGACGGTGACCGGGAC  
GACCGGGCGCGGAGAGGGCGATTTCAAGTGGTCCCGGAGGCGAGGAAGCGGTGGCCGGG

OsWAKs-Supplemental Data 1[1].txt

GTGTGGCTCGGAGTTGCCGATCCGAGGGAGGAAACGGCGCAGTCCGGCGTCGACCGGGGA  
GGCGGGGCGACACAGATGGAGACGGCAAACACGGCGGCGATCTCGGGTTGGTGGTGAAGT  
TGGTGACTCGGGCAGCGAGGCGCGACAACCGAGCGGCGGCCGAGCTTGACTTTGAGGCGGC  
GAAGGTAAGTGGCAGTGGTGGCGCATTGGGGCGACGGCTAGGGCGGCGGTGGCGCGCGGCT  
GGAGGCGGTGAAAGGGGCGGCGGCTCGGGTGTACAGTGGGAGTGGTGTTCGAGGGGTGG  
AGAGGGGGAAATAAGAGGCGGCGCGACTTCCCCTTGCAGTGGCGAAGCTGGCGGTGGCGG  
CGGCTCGGCGCGGCGACGGCTGTGGCGGCGGGAACGGCGACCGGAGTTCGCCGGAGAGC  
GGCGGTGCGTGGGCTCGGCGCGGGGAGAGCGAGGGAGGGCGCGGCGGCTTGGGAAAAATG  
GGGAAAAAGGATGAGGGAAGGCCGGGGATTGTTTTTATAGGGAGGGGAGGCCGGATCGA  
GCCCCGGAGAGGCGGAGTGGGGCGGCAACCGCGGTTGGCGTGGGCGGCATCGTGGGGTG  
TGGGTGGCGGTTTTGGAGGGGAGAGGTGGGGGAAACGGCGCGGACGTGGGCGGCGAGGT  
CCCACGGACGAGCGCGCGCGCGGGGTGGAGGAGGTGGGCGGAAACGGCGGCGTCTGTGG  
GGTGGCTCGGGCGGCCATGGCGGCAGTTGTGGCCGGCGTGAGGAAGGGGGATGGGCGTGA  
CAAGTGGGTCCGCGGTCCACTTGTGGCGCTAAGGGAGAGAGATGGGAGAGGGAGGCAA  
AATAGACTTGCAGAAAGGAGCGAGCTGGGCCGAGGAGGGGAAAGGAGGATTGGGCCGAA  
AGGGGCCCAAAGAGAGGAAGGATTTAATTTGTTTTCTTTTTTTTTTTATTTAATTGATTC  
AATGAACTTTGTGCCATTAATAATTTCTTGTAGCTCCGAAAATTCACGGGAAATTTTCAG  
AGAGTATTTTAGGGCACAAAGAATATTGCAAAATATTCCCGGCAATGATTTTTAAGGGA  
AAATTTTAATTCCTCCATTATTTCACTTGATTAAATTGCTTTAAATTTTATTTAATTTCT  
AGAAATGTATTATTAATGATTTTTAATCCCGAACGAAAATCGGGCGGTTACAATGTAC  
GTATAACGTCTGTTTTTGTGTATATCATTTCTTTCTTTCTCGGTCTGGTTGTTAATT  
CGTACATACATATGCCTTCTCAGCTTTTTCTGGTCAATATTTTTTATGAAAAGTTTTACT  
GGTAAATTAGGAGGGATAGATTACTATTTATATATAATATATTTATAACAAATCTAATCT  
AATGGTTTAAACTAATGGGTCCACTAATTAATGAAAATCGGGGGCTAGATTTTTTTCT  
TTTTCTCAGAAATTTCTAAGTTTTTTCTATTTTATTAGAGCTCCATATGACAACTTAAG  
AGCGTTTTTAGAGCACCATGTGGTAGTATGAGAGCGTTTGTAGGAAGTTTAATAGACTTT  
AAATTAGTATATATATAATAGACAGGTTAGTCATAAATAATTTCAAGATATATATAAGCA  
TATTTGCACGATTTAGATATATAGTTGCTAAATTTTTAACATGAAATTTTGCTTTTCTA  
ATCAATAAAGCATGAAAATAGATAAAGAATATAACGAAGGATGATGGTACTGTAGATAAT  
GGCACGTACGTACCTACATTACATATAGGCCTGAGCGGGGCGGTTTAGGAGATTGATTT  
TTTAAAGATAAATCTAATGGTTGTAATAATGGGTCCACCAAATTTAATTTAAATCAATAG  
CTGGATGTTTAGGAATTTCTAATTTATTATAGTGCCACATGGCTGCTTCAGAGCGTTT  
GTAGGATGCCACGTGGCGGTTTAGGAGCATTTGTAGAAAGTTAATGGACTTTTAGTATA  
TAATAATAATAATAATAATAATAATAATAATAATAGTCCATCTATTATACTTATAATACT  
TATTTATTATACTTGATTGATTTATACTTGATTGATTTCTATATCTCGAACTATTGTTGA  
CGAAATAAAGAACATGTTAGGAGTGTATATATGGAGCCATGCATAATGGCACGGAAGAGG  
TGTGCAACTTGATGGCGTATTTGCTTTTTTAGATTGTTCTAATTTAATGGTTTAAATTA  
TGGGTCTAAGCGATTAAGGGAATAATCGATTAGGTGTTTTGTTTTATATAAATGGC  
TTTTATATGTAATAATTTATTATAGCGTCAATTTGGTGAATGTATATATGTACGTAAAG  
ATAATAACCTGTTGTTCACTGAGGTACATATACACGTATGTTTCACATTATATATAGCTA  
ATCTTGCCAGAGGGTCGTAACATACTTGGCTGCCATTTAAATTTGTTTTGACGGAAT  
AATTTTGAGATAAATATGGCAAGGCCAAGATCGTTTTGTACAGACCCATGTCCGACGTCC  
CCACTTGCGTATTCTAATAAGGTAACATCGCGTGGTCTTGTCTTCTCATGTTGCACC  
ACGCGCAGCTTAGGAGCGTTTGTAGGATATCCAGTGGCGGTTGAGAGTGTATAGG  
AAGTTTAAATGAACTTTTAGTATATAATAGATAATAGATAGATAGATTTCTCCATAAGTA  
ATTACATTGTAGGTAGGGAACGACCCGAACCTTATGACTCATTTATGGTTTGTCTCTTA  
CAAATGATACCATAAATTAATAACACATCGATGTCTGCAATATCTATCTACAGAACAT  
CTTAGGGCTTGTGTTGATGGCATTTAATCTTTGGTGCATTTTAAATTTCTAATTTCTGG  
ATACAAATTATCCCCACCATAATCCCCATGACCCAAACATACAAGTTAATAGGTTAGGTT  
GAGGGGTATTGAAGGGGTTGGGGATGATGAGAGAAGGGGATTCACCCAATCCACCCCA  
TGTTGCCAAACAATGTTTTAAGCCTTTTTCAGTTAATCTCTCTGTCAAGTAGATTGAAGT  
GGATTTAGAGAAAATTAAGGTGTGGACTTGTTCATTAATCTCCTTGAAAAAGGATTGG  
ATGAAATTGAGGGGCGCTCAAAATCCCATCCAATTTCTTTTGTGGGGTGGGAGGTTGCT  
TAAGTGAAGGAGACCGAAGGGAATGATTGTTGAACACACTAAACTTACGGTTTGCTTA  
ATTGTGTGCTAGACTGTTAAGTACAACATGTACATTGATGCCAAAATATTGAAGTTCA  
AACATGATTAAGCCTTTTCACTAAGAAAAAACTCCGTCCTTTTCAGGGCTTGTACCT  
GTGTATTTGTTGGTCTATTTGGTTTCTTGGATGGGAGGTGATCCGGCACAGACAGAACA  
CAAAAAACAAGCTCTATTAAGACAGACAGATGAATTTTTTCAACAACATGGAGGTGAGC  
TACTGCTAGAAATGATGAAGGTAGAGGGCAATGTTGGGTTTACCCTCTATGAGAGAGGGC  
AGATCGAAACTGCAACAAATAACTTCAACAAGGCACACATTGTCCGGGAGGGAGGACAGG  
GAACAGTTTACAGGGCAGAGATAGATGGCACTATTGTTGCGATAAAAAGGTGCAAGGAGA  
TTGATGAGAGCAGGAAGATGGACTTTGTACAGGAGCTGGTCATACTTTGTCTGTCAACC  
ACCCTAACATTGTCAAGCTACTTGGTTGTTGCCTACAATTTGAGGCACCCATGCTTGTCT

OsWAKs-Supplemental Data 1[1].txt

ATGAGTTTGTGCAAAATAGAACACTTCATGAGCTATTGGACTTCCAAAGGAACAGGAGTT  
GCCATGTCACTTTGGGAACCCGCCTGAGGATTGCCGCCGAGTCTGCCGATGCGCTTGCGC  
ATCTCCATTTCGTTACCAACCCGATACCTCATGGTGATGTGAAACCAGCGAACATACTAC  
TCACCGAAGAATTGGTTGCAAAGGTGTCTGACTTTGGCTGCTCAACAATTGATGAGAAAA  
CTCAGGTTGCGCCCAAGGGCACACCTGGATATCTTGACCCAGACTACCTGCTTGAGTATC  
AGCTCACAGCTAAGAATGATCTGTATAGCTTTGGAGTAATTCTGGTTGAACCTCTAACTG  
GTAAGAGGCCACTATCAAAAGAAAGGAAGACCTTGACCTCAATGTTTAAGGAGGCTATGA  
CGGATGGCACACTCATTAACTCCTTGATAGTGACATTGTTAATGAAGACAACCTGAGAG  
TGATCCATCAGGCTGCAGTGCTAGCGAGTCAGTGCTTGATTATTCCAGGTACGGCAAGGC  
CAGAGATGAGGTATGTGGCAGAGCAGCTTCAGCAACTTGCAATTTGCAGATGAAGTGCAGC  
AAGATCCACAGCCACCGCTTGTGCTTGCGGGTCTTAGGTTTACGGCAGAGATGGCAAATA  
CACGTACAACATCCTCATGGCAAACCTGATAGCAAGACTACCGGGGTTTACAGCCTCGAGA  
AGAATGTTAGACTTTGCTCTAGGATCACCTAG

>OsWAK57, 4374.t00003, Chromosome 5, post-processing

ATGCTCACCAAGGGCGGCGACGGCGAGACTGCAACGGGGAAGCCGGCGGGGCTCCTCG  
GGGAGGCAACGGTGGTCCGGTGGCGTACCACGGCGCGAGGCGGCGGACGGTGACCGGGAC  
GACCGGGGCGCGGAGAGGGCGATTTCACTGGTTCCCGGAGGCGAGGAAGCGGTGGCCGGG  
GTGTGGCTCGGAGTTGCCGATCCGAGGGAGGAAACGGCGCAGTCCGGCGTGCACCGGGGA  
GGCGGGGCGACAGATGGAGACGGCAACACGGCGGCGATCTCGGGCTTGTACCTGT  
GTATTGTTGGTCTATTGGTTTCTTGGATGGGAGGTGATCCGGCACAGACAGAACA  
AAAAACAAGCTCTATTAAGACAGACAGATGAATTTTTTCAACAACATGGAGGTGAGCTA  
CTGCTAGAAATGATGAAGGTAGAGGGCAATGTTGGGTTTACCCTCTATGAGAGAGGGCAG  
ATCGAAACTGCAACAAATAACTTCAACAAGGCACACATTGTCCGGGAGGGAGGACAGGGA  
ACAGTTTACAGGGCAGAGATAGATGGCACTATTGTTGCGATAAAAAGGTGCAAGGAGATT  
GATGAGAGCAGGAAGATGGACTTTGTACAGGAGCTGGTCATACTTTGTCGTGTCAACCAC  
CCTAACATTGTCAAGCTACTTGGTTGTTGCCCTACAATTTGAGGCACCCATGCTTGTCTAT  
GAGTTTGTGCAAAATAGAACACTTCATGAGCTATTGGACTTCCAAAGGAACAGGAGTTGC  
CATGTCACTTTGGGAACCCGCCTGAGGATTGCCGCCGAGTCTGCCGATGCGCTTGCGCAT  
CTCCATTTCGTTACCACACCCGATACTCCATGGTGATGTGAAACCAGCGAACATACTACTC  
ACCGAAGAATTGGTTGCAAAGGTGTCTGACTTTGGCTGCTCAACAATTGATGAGAAAACT  
CAGGTTGCGCCCAAGGGCACACCTGGATATCTTGACCCAGACTACCTGCTTGAGTATCAG  
CTCACAGCTAAGAATGATCTGTATAGCTTTGGAGTAATTCTGGTTGAACCTCTAACTGGT  
AAGAGGCCACTATCAAAAGAAAGGAAGACCTTGACCTCAATGTTTAAGGAGGCTATGACG  
GATGGCACACTCATTAACTCCTTGATAGTGACATTGTTAATGAAGACAACCTGAGAGTG  
ATCCATCAGGCTGCAGTGCTAGCGAGTCAGTGCTTGATTATTCCAGGTACGGCAAGGCCA  
GAGATGAGGTATGTGGCAGAGCAGCTTCAGCAACTTGCAATTTGCAGATGAAGTGCAGCAA  
GATCCACAGCCACCGCTTGTGCTTGCGGGTCTTAGGTTTACGGCAGAGATGGCAAATACA  
CGTACAACATCCTCATGGCAAACCTGATAGCAAGACTACCGGGGTTTACAGCCTCGAGAAG  
AATGTTAGACTTTGCTCTAGGATCACCTAG

>OsWAK58, 4374.t00004, Chromosome 5, pre-processing

ATGGGGGAGGGAAGGAGAGGAGTTAGAGGAGAGGAGGAGGAAGAGGAAGAGTGGGATGAA  
GAGATAAGGTGAAGAGGTGAAGAGATAAGGCTGCCATCTCCTCCTCCTCGATCTCGC  
AGATGGCAGATGCCTCGTACTCTCCGCCAGATCTTTTGTTCGGTTGGTATTACCAACC  
GGGACTAAAAATAGATCTTACCAACCGGGACTAAAGATAGTAGGCATCTTTTTTCCCGGT  
TGGTAACATTAGAAATAGATCTTTAGTCGCGGTTGGCAACACCAATCGGGACTAAAGATT  
AAAAAGCAGCTCTAACTTTTGAACCGGGACTAAAGATAATCTTTAATCCCGGTTTTTAT  
TGCAACCGGGACTATTGTGGATTTTGACCGACCGAGCAAAGATGATTTCTCCACTAGTGC  
CGCCACCTCCTCGTAGCAGCTGCTCTACGGCATGTGGCGACGTGAAGATCTCGTATCCTT  
TCGGGTTTCGAGGCCGGCTGCTCGTGGCCTGGCTTCGAGCTCATCTGCCGTGACACCATCA  
AGGGCAAGAAGCCCTTCTGCCACCGGTACGGAGAGCGTTGGATACTTGGAGCTGGAGA  
GCATCTCTCTGCTCGATGGTAAGGCACGGGTGTGGAACAACATCAGCTCCTATACTGCTA  
CAACAGCGCCACTAAAGGGATGACAAATGAGTCCAGCGACACGGTCTACCTCCCCGGCCG  
AGGCATACAGGCTCTCCGACACCGAGAATAAGTTTATAATCGTTGGGTGCTACACGGTGG  
CGTATACAGAGTGGAGACAGGAGGACATGCGGTACGCCAGCGCGTGCTCGCGCTTTT  
GCGGGCCGAAAGGCAATAACTTGACGAGCCTAATGGATGGCGCCTGCTCCGGCACAGGCT  
GCTGCGAGGCCACCATCACCGAGGGACACACCTCCTACAATACGATGTTTGATCCGGACT  
ACAACACGACGAGATCTACAATGTTAGCAGCTGCAGCTATGCGGTGCTGATGGAGTCAT  
CAAGATTTAGCTTTTCGGAGGAGCTACGTGATGAATTCATCGAGTTTCATCGATACCAACG  
CGGGGCGGGTGCCAATGGTTCGTTGACTGGGCTGTGCAGAACGCGAGCAATTGCGTGGAAG  
CGCAGAAAGATCATGCTCCTACGCGTGATCAGCAGCAACAGCGGTGTCGTCAACTCGT  
CCAGCGGACCCGGCTACATCTGCAACTGTACTCATGGATACCAAGGAAACCCTTACCTAT

TACACGGCTGCCAAGGTGAATATGTTAAATTTCTATAG

&gt;OsWAK58, 4374.t00004, Chromosome 5, post-processing

ATGGGGGAGGGAAGGAGAGGAGTTAGAGGAGAGGAGGGAAGAGGAAGAGTGGGATGAA  
GAGATAAGCTGCTCTACGGCATGTGGCGACGTGAAGATCTCGTATCCTTTCCGGTTTCGAG  
GCCGGCTGCTCGTGGCCTGGCTTCGAGCTCATCTGCCGTGACACCATCAAGGGCAAGAAG  
CCCTTCCTGCCACCGGTACGGAGAGCGTTGGATACTTGGAGCTGGAGAGCATCTCTCTG  
CTCGATGCGACACGGTCTACCTCCCCGGCCGAGGCATACAGGCTCTCCGACACCGAGAAT  
AAGTTTCATAATCGTTGGGTGCTACACGGTGGCGTACATCACAGTTGGAGACAGGGAGGAC  
ATGCGGTACGCCAGCGCGTGTCTGGCGTTTTGCGGGCCGAAAGGCAATAACTTGACGAGC  
CTAATGGATGGCGCTGCTCCGGCACAGGCTGCTGCGAGGCCACCATCACCGAGGGACAC  
ACCTCCTACAATACGATGTTTGATCCGGACTACAACACGACGACGAGATCTACAATGTTAGC  
AGCTGCAGCTATGCGGTGCTGATGGAGTCATCAAGATTTAGCTTTCCGAGGAGCTACGTG  
ATGAATTCATCGCAGTTTCATCGATACCAACGGCGGGCGGGTGCCAATGGTCGTTGACTGG  
GCTGTGCAGAACGCGAGCAATTGCGTGGAAGCGCAGAAAGATCATGACTCCTACGCGTGC  
ATCAGCAGCAACAGCGTGTGCGTCAACTCGTCCAGCGGACCCGGCTACATCTGCAACTGT  
ACTCATGGATACCAAGGAAACCTTACCTATTACACGGCTGCCAAGGTGAATATGTTAA  
TTTCTATAG

&gt;OsWAK59, 4374.t00007, Chromosome 5, pre-processing

ATGAAGAAGGCTTACCTGGACAACCTGCATGACCTATGCAAAAATGAGGGTCACTTGGCGC  
TGCAGCAAGAAGCTAGTAAAAAGGTCACTGGAGTCTGGCAGGTGAAAATCCAATATGAAC  
GTCAATAAATCTGCAAAATCAGCCGCAGAAAACAGTAAAGTCTAAAATGTAATTCAAATA  
AGCAGAGAATTTAGAGAAGCTTCCATGCCTTAGAAAAAGTCTATAGTGTAGTTTGGATTA  
TAAGGTATTCATCGGTGATTAGGTATTCTAAACAATCAGTGTAGGATAAATCAAATTGAA  
CATATGGCATAGAGAATATCAACAAAATTCGGCTCAATGTACAAGGAAAATGTTACATAC  
CAGCCTTATTTCTGCAGATTGAAAAATAAGATTGGAGCGGAACAACACATTTCAGCAAAAGAA  
AGCTGTAGATACTGCATCATCAATCACCTTCTTTACATGTGAAAGAGCTGGCGAGTAAG  
AGCTTTTCAGAAAATGCAACAGTACAGAATCAATCAAAAGATACAAGGGATTATTTGAAG  
TGGTACCTATGCAGCACGAATGCAAATGTAGAACCTCATACAGGTAGAAGCTTGAATGGA  
ATGAAGTGGTAGAGGATGACCGAGGACCTGAATTTGTTTGTATTGAAGTTGCGTCTCCC  
CGGCAATAAGTGAAAAACGGCGATGATTTTGCCATGACATTACAGTCGCATGAAATTAAT  
GTCTTGATGACAACCATGAAGGGCATAGGCGGTTTCTGGCTTTGCTATGGGTTTGGGGAG  
GGGGTAGGGGAAGCAAAGGGAGACGAACCATCGCGGGGTGAGGTGGGGCAGGGGAGGCGC  
CACTGGGCCATCGTCACGGTGGCCGTGCTACTTGCCGGCGTCAAGCATCAGAGAGGAAGC  
ACCACAGGTGGGGGAGGAGAGGCGGCGTGCAGTTGCGCTTCCCTGGCGGCACCACTTCTT  
TGTCGTGGGGACGGACGAGGAGAGGTTAGGAGGAATGCCGGATGGTATTTACTAGGGTGT  
GTATTGGGCTTTTTTGGCCTTTTTCTGTGTGAACCAATGGCTTGACGAAGTGCCTGGGC  
TTACGCGTGTGCGAGCTCCAGATTAGATGGAACGGCTAAGATTTAACAGGTGACGTGG  
CTTAACCATAAATTAGCTTTGGGTTTTAACTATATGGAAGAAGGGATCTGATGGAATAA  
AACAAAGAAAATCGTCCAAATAATTCTATTTTTTTTTCTTCCATGCCTTCTGTAACT  
GTCTGTATTACAGAGACGGGAGACATGAAATTGATTTTTGCAATCCATTAAATTGTACAG  
TTTTCTAACTAAGCACCAAAAATTCATTTCTTAATGTCACTGGTATTTTGTGTCAGAT  
ATCGATGAGTGCAAGGAACCAATAAGTATCTTTGCTACGGAATAATGCAGGAATAAACTT  
GGAGGCTATAATTGTACTTTGCCGTTTTGGTACAAGAGGCAATGCCTACAATGGACCATGC  
GACGGAGGGCTAGCAATTGGTACACAGAAAATTTCAATCTTGCAATATTTAGATACATT  
CGAACAATTTGAATCTCTTGTTGTCGTAACGATAGATCAATACATTTTTTTGTGTTACT  
TATTGATTCTTTTGAACATGTCATGGGCTAATTCCTCATGATACATAGTTGGGCTGAACG  
TTTTTAACATCTTCTTGGCAGGAATTTGTGCCACTCTTTTGGTTGCTTTAACGAGTTTGC  
TTGGGATAGAATGGATCAAATACAAACAACGAATTTAAAGGCATGACCTCATGAGAAAGA  
GGGGTGAGTATTTTAATCTACACGGAGGCCAATTGTTGACAGATATGATGAACATAGAGA  
ACAACATTTTCAATTAAGTTGTATGACCGAGATGAAATTGAGTTGGCCACAAAAGGCTTTG  
ACAAGATGTCAATCATCGGTGAAGGAGGTGAGGTAAGTGTGTTTTAAAGGGTATAATCTCG  
ATCAAGTGAACAACCTGTTGCAATTAAGATGTGCAAGGGATTTGATGAGAATAGTAGGA  
CAGAATTCACGCAAGAGTTGCTCATACTTTCTCGAGTCAACCATGAAAACATCGTGAAGC  
TAATTGGCTGTTGTCTGTCAGTTTGAAGTTCCAGTGCTTGTGTATGAATTTGTCCCGAATA  
AGACTTTGCACTATCTAATTCACAGCCAAAATGATCCATCCATCAGAACACTAGAGATCC  
GCCTAAAAGTGCCTGCCGAATCTGCGGAAGCATTTTTCATATCTACACTCACTGGACCACC  
CTATCTTACATGGGGATGTGAAGTCGATGAACATACTACTTAGTAACAATTTTATTGCAA  
AGATTTCTGATTTTGGGTGCTCCAAAATTAGGGCAGCTGATGGACACGATGACGTGGTGA  
AAGGTACCATTTGGCTATCTAGATCCAGAGTACCTGCTGAAGTTTGAAGTCACTGATAAGA  
GTGATGTGTATAGTTTGGTGTATCCTTTGAGCTTTTAACTCGTCAACACCATTAT  
CTAAGCAGAAGGTGAGCCTCGCATCAGTATTTCAAGAGGCCATGAAGGAAGGCCTATTTT



OsWAKs-Supplemental Data 1[1].txt

TTGAGCTCATAGACACGGAAATATTACATGAGGATAACATGGGATTGATAGGTGATCTAG  
CAAGGCTGGCATGCCAGTGCTTAGCAATGACTAGTGAGAGCAGACCAACAATGAGCAGGA  
TTGCAGAGGAATTGCGACGAATAGAAAAACAAGTACGACAACACCGTGGGGTACTTACAA  
GTATTAGTTCATTGTCATTGTCAGCAAGTTCATCTGCAGACACATCAGAGCATTTTCACAG  
GTGAAACCAATGGTTACGACAGCCTTAGGAGGGTGGCTGCAATGAGCATAGAATTTGCTA  
GATGA

>OsWAK59, 4374. t00007, Chromosome 5, post-processing  
ATGAAGAAGGCTTACCTGGACAACCTGCATGACCTATGCAAAAATGAGGGTCACTTGGCGC  
TGCAGCAAGAAGCTAGTAAAAAGGTCACTGGAGTCTGGCAGATTGAAAATAAGATTGGAG  
CGGAACAACACATTACAGCAAGAAAGCTGTAGATACTGCATCATCAATCACCCCTTCTTTA  
CATGTGAAAGAGCTGGCGAGTAAGAGCTTTCAGAAAACCTGCAACAGTACAGAATCAATCA  
AAAGATACAAGGGATTATTTGAAGTGGTACCTATGCAGCACGAATGCAAATGTAGAACCT  
CATACAGGAATTTGTGCCACTCTTTTGGTTGCTTTAACGAGTTTGCTTGGGATAGAATGG  
ATCAAATACAAACAACGAATTAAGGACATGACCTCATGAGAAAAGAGGGGTGAGTATTTT  
AATCTACACGGAGGCCAATTGTTGACAGATATGATGAACATAGAGAACAACATTTTCATTT  
AAGTTGTATGACCGAGATGAAATTGAGTTGGCCACAAAAGGCTTTGACAAGATGTCAATC  
ATCGGTGAAGGAGGTGAGGGTACTGTTTTTAAAGGGTATAATCTCGATCAAGTGAACAAC  
CCTGTTGCAATTAAGATGTGCAAGGGATTTGATGAGAATAGTAGGACAGAATTCACGCAA  
GAGTTGCTCATATTTCTCGAGTCAACCATGAAAACATCGTGAAGCTAATTGGCTGTTGT  
CTGCAAGTTTGAAGTTCCAGTGCTTGTGTATGAATTTGTCCGAATAAGACTTTGCACTAT  
CTAATTCACAGCCAAAATGATCCATCCATCAGAACACTAGAGATCCGCCTAAAAGTCGCT  
GCCGAATCTGCGGAAGCATTTTTCATATCTACACTCACTGGACCACCCTATCTTACATGGG  
GATGTGAAGTCGATGAACATACTACTTAGTAACAATTTTATTGCAAAGATTTCTGATTTT  
GGGTGCTCCAAAATTAGGGCAGCTGATGGACACGATGACGTGGTGAAGGTACCATTTGGC  
TATCTAGATCCAGAGTACCTGCTGAAGTTTGAGTCACTGATAAGAGTGATGTGTATAGC  
TTTGGTGTCTATCCTTCTTGAGCTTTTAACTCGTCAACACCATTATCTAAGCAGAAGGTC  
AGCCTCGCATCAGTATTTCAAGAGGGCCATGAAGGAAGGCCTATTTCTTGAGCTCATAGAC  
ACGGAAATATTACATGAGGATAACATGGGATTGATAGGTGATCTAGCAAGGCTGGCATGC  
CAGTGCTTAGCAATGACTAGTGAGAGCAGACCAACAATGAGCAGGATTGCAGAGGAATTG  
CGACGAATAGAAAAACAAGTACGACAACACCGTGGGGTACTTACAAGTATTAGTTCATTG  
TCATTGTGTCAGCAAGTTCATCTGCAGACACATCAGAGCATTTTCACAGGTGAAACCAATGGT  
TACGACAGCCTTAGGAGGGTGGCTGCAATGAGCATAGAATTTGCTAGATGA

>OsWAK60, 4374. t00015, Chromosome 5, pre-processing  
ATGGCGCCTAGCTTCAAGTCGACTGCAACAATACGGCGAACGGTTTTAAGCCGTTTCGTT  
GGAAATGTCGAAGTCAATCCCTCAGCAATGGTCAGGCCCGGGTAATGAATCACGTATCT  
TCTTCTGCTACAACCGCACGTCCCGACAGATGAACCCTGCGGACGTGTGGTATCTGAAC  
CTCACGGGCACGCCCTACAGGCTCTCCGACTCGGCCAACAAGTTCACGGTCATCGGGTGC  
CGGACGCTGGCCTACACCTTCGACGATTACAACGTGGGCAAGTACATGAGCGGGTGCCTG  
TCCGTCTGCCGGCGAGGTGACTTGAGCAGCGCCATCAACGGCAGCTGCGTCCGGATAGGC  
TGCTGCCAGACAAACATCTCAACGGGCCTAAGCTATTACGAGGTGATGTTGACTACACC  
CTGAACACATCCGGGATCTACAACCGCACCCCTGTAGCTACGCGGTGCTCATGGAATCG  
TCTAGCTTACCTTCTCAACCCACTACCTAAGTTCACGGGCGTTCAACACCTCCTATGGT  
GGCCAGGCTCCGCTGGTGTGATTGGGCTATCCGGACTGCTAACAACCTGCGTGGAAGCA  
CAAAAAAATCCTGCGTCGTACGCGTGCAAAGGTGACTATAGCGTCTGCCTCAACTCCACC  
AACGGACAGGATACATATGTAAGTCAAAAAAGGGATACCAAGGCAATCCCTACCTTCAA  
GATTCCAACGGCTGTCAAGGTAATATTATGCCTATAACAAATACTCCCTCCGTATTTTA  
ATGTATGACGCCGTTGACTTTATAACCAACGTTTCTTTATTTTAAATGTATGACTCGTCTT  
AGTCATGCTTGAAGAATATTTGATGATAAATCAAGTCACAATAAAATAAATTATAATTAC  
ATAAAAGACGAAAGGTCAAACGTTTGTCAAAAAGTCAACGGCGTCATATATTAATAATG  
GAGGGAGTACATGTTAGTGAAAGATTAATATAAATTGTAATTGCACAGTTCTTTCCTCTG  
AGAATTTTTTTTTCTCTTTGCCCAAGTTGACTGGTTCGGTTAATTATTTTCAATCCTATAA  
TTGGCTCGTGATCCCTTTCTTGTAGTCAACTTTTGTCTTTTATTTATTTGCAATTTTGT  
TAGTCGTCATAACGTTAGTAGATGGATGAAAAGATTTTGCCCGAGTGATTAATTTTTTT  
ATGTACCAACACAATATTTTATTAATTATAAATAAATAAACTATAAATTAGATTTTCATA  
GTACTCCATCCATCTCAAATTATAGGCTTATATTTTTTACACGGTCTTTATTGATATACT  
TTGACAATTAATTTATTTTATGTTATGTTCCCAACAAATATAAAATTTGCATCACATGAA  
AGTAACCTAAAAATATGAATCTAGTGATATAGCATAATATTTAGCATGGTTAATATGATT  
ATTAGTTAAAAGTTATCAAGTTTGAATTTTTTTCTTAAACAGAGAGTGCGCTATAATTTGG  
GACAGAGAGGTAAGAGTTAAGATTAATTGTTGTAAAATAAATTATAAAAAAATAATAA  
ACCATGTCACCTTTCAAAGTTGAATCAAATATATAAAGGAAATTGATGGTCGATGTTTA

OsWAKs-Supplemental Data 1[1].txt

AAGAGTTGATTACACTTTAGACCAGTTTTTTTTAAAAAACTTTAAGCTTTGGACTACTGG  
AGCCACAAATAGAGGACCCTCTGCCCGATTCCGGTGCATGCCGGTGAGCCCCTCTTCTCAC  
AACATTGGCGAGGTTTCCTTCACTGCCAAATAATGAGCTTGAGCGCTCGATCTCGGG  
AGAAACAGGTGAAGCTAAGGCGGATGAGCCTGTGTGTCCCAGAGGGCCGAGCTCAACATT  
CATGGCTTCGTGCGAAAGGGACGAAGCCACGAAGGTTGAGCTCAGCCCTTGGGGTGGTGG  
ATCAGAGGAGTTGGAGCTCGAGCTCAAGGAAGGACATCATGTCCTTTGCCAAGCCTACTG  
ACCTCCCCGTTCTCATTTTTCCCTGTTGGCAAGGAGCCAGTGAGTAAAAGCATAACATTAT  
TCATGCATGTTTCATGCAGTATAATAAATTTAAAGGATTTTACAGAGCAGAATATTTCAA  
AAATAACATACAGGTGAAATATACCGGAATTTTGACAAAATAACCAACTCATTTCAAGAA  
TAAACCATGCCAAAACTAATTTCAAGAAAAAACACGTGTTACAGCATCAAACCTCGATGG  
AGTGGATCTATAACGTATTAGCACCAAAAATGTTGACGCTGATAGTATGAGGTGAAAGGT  
TGTTTTGCCATGTCATATGGGGTTAGTGGTAGAAGCATTGGCACTGACCTCTGGTCCACT  
GCGGTTGTTAAAAAATTCAGCTACATTCACCAAACGAGATTGATGTTGTTAAAAAAGTTC  
GAACTGTATCATTTTTTTCTTTACATGCATATTTTTCTACCGCTACGCTGAAAGTTGTG  
ATCTCTTTTCATATTTATATCATAATATAATATATTTATTTTGACAAAAAATAATGTAGTT  
ATCAAGTTATAATGAATGAAAAATATCTCAATAAAGTTCTAGAACATGTAATATATGACC  
TTTTCATAGTTTCTCAAGTTTCAAAATAAAGTAAATTTATAAACAGAATTTGTTATTTTAG  
AGAGATAATTGGTTAGAGTCACGGTGTAAAGTATAAGTATATGCTTGCTACAACAAAACA  
TTGAAAAAGGGGGCTAGGCGTGGATGAAAGCAAAAATCACAAGTCACCTGGCTAGGTCAG  
TAAATCTGGTAAATACTGGCTGTAGAGCTTTTTATACTGTAAAGAGGTGATCAGCCCTGC  
TAACAAGCATGACAAAACACGCTACCTCATACCATAGCTCAGTGCCAATATCTATGGCA  
CCAATACGTTATATGTCCGCACCATCGAGTTTGGCGCAGAGCTCGTGGTTTATTTTAGGA  
TTTAGTTTTTGGCACGATATATTTTTCAAATATGTTGGGTAAAACGGTTAATTTGTCAAA  
ATTTTGGGACATATTAATACTCCAATTTATCTCTATATATGTAATACACGTCACATACA  
CTACTACAAATATCGTTTTTGCAAACGGACAAAACGTATTTTCGCATGCAGTTGGGCGGG  
CTGCATGGAAGAAAAGGTCTGCAAAAATCAGGATTTTACATGTGGCCCGCGCAACCGCA  
TGCAAAAATCCGATTTTACCCGGCCGCACTCGAAAAGGAAAAATCGCGAAATAAAATAAA  
AATTCCAAACATAGAAAAATTAATACACCCGCGCCATTCTCCATTGTCCTCCAGTCAC  
CGTCGCCATCATCCTTATCCTCCAATCGTCGCCGTATCCTCAAGCCGCCGCCACCACCG  
TCGACATTGTCTCTTCCCGTCACGGCGAGGAGGCACAGGAGGGCCGCCGCGCAGCGGAT  
CCGGGTGGGGGAGGGCCGCCGCCGCCGCCACGCCGCCCTGCTGTGGCCCTCGCCAC  
TGCCGCGCCGGAGTCCGCGTCGCGAGGCGGTGCCCGCTCCCGGCGCCTCCCGCTCGGTGA  
GAGAAAGAGAGGGGAGGAGAGGAAGAAAAATGAGAGGGAGAGGAGAAAAATGAGAGAGATAGA  
GGGGAAGTAAGAGAGGGGAAAAATATCAAGAGTGTTGAGAGAGAAGAGGATAAGAGGTGAA  
AAATTTTGAAGTGGTGAGGAGGGAAAAATTTTGCATGCGGACCCTAAAGAGATCCGAAA  
ATAGATTTTTCGCATGCGGATCGTTAAAAGGCCTGCATGCGAAAATAGACTCATTTTTACA  
TGCGACCCCTTAAGAGGTCCGCCTATGAAAATAGATTTTTGCATGCGGGTCTCTTAAGGA  
ACCGTCTCGCAAAATGGAGGTGCAATTATGCCGCCAATTACGGTCCGTCTGCCGTCTAAA  
GAGGTCTCTGATACAGAAAGTTTATGTAGTAGTGATAGTTTGTCAATTTTCTAATCTATG  
CCAATAAAGTGAATGATCTTTAGAAAACAAAATTTAATGGTTGTTGAGGAGGTAGTATA  
AATTTTGGTAACTTAAACTGGGTACTTCCCCAGTACCTTTGAAGAACCATAAAATTTGT  
CCTTGAGATGTTCAAATATCTTTGTAAATAGAAATGGGGCAAATATAAGGCGGAGACCA  
CATCTTTGAAGCCTGGTGGTAACCATGCAACAACATCTAAAAAGTTCTAAAAAATCTC  
AAAAAGTTCACACATAAAGATAATATGATATTAGAAAATCATACAAAACATAAGACCAA  
ACTTGACTGTTGTGACATAAAAAATAGTAAATAGTGAAGAAAAAGAGAAACATTAGGAATA  
ATGTTATTTTCATAGCGGCTTGATAATTTTAATTTATATCTCACAGACAAAGTTGAATTTG  
GTAGTACATTTTTGTATGCATATGGTTGTCTAATATCATCTTATCTATATGTGTGAATAT  
TTTGATTTTTTTTTTTGAAGTCTAGACAAAAGTTTACGAGTTTGACCAAAATATATGATTT  
CCACTACATATTGACAACTAAAATGCCTCAGTATACATATTTCCAACAAATAAGAAAATA  
TTATATGTAGCCAATTTGTGCAGTATAGAAGTCTTGATATTTTGTTAATTAAGTTTGT  
TTTTAATTAGATTTTTTTGTTACAGCATATGAAGAGCAATCGTTTGACCAATGATAATAGC  
ACAAAATGTTTTTGGGCAGCTTATGAAAGATGATTCACGTACACGAAAACAATGAAAATA  
TTTTTGTGTAGCATATAAGAGGCAAATTATATTTCCAAAATAATTAATCTCGCAAAAAAT  
ATAAAATATATATACATAAACTTCTATGTCACGCAAGGAGCCTATAAATAATTTTCATAA  
TTTTCAGAAACGTATAGTTGATTTCAATTAGTTGTCTAGGCATTCAACTTTTTTTCTTGAAA  
TTATCTTATTTTTCTATATATTTTTCTAAAGACGTGAAAGGAGAGAGGGCAGAACAGTTAG  
CAGAGTGGGCCACCTTGTTTCCTGCTATTCTCTGCTCCCTCCATCCAATAAAAAACTAAC  
CTAGTACTGTAGTACTGGTTGGGATATATTTTAGTATTACGAATATGCACGTACCTTTAT  
TAAATTCATTGTACTAGAATGTGTACATCCTGTTCTAGACTCGTTTTTTTTGGGACGGGG  
GGAATATTTTACAGTTCTGTATAGTTTGTACATACATTCTTTACTTATTATAAGTATACC  
GTATAACTATATATTTCTTTCTAAATGCCTTTGAATTTGATTATATTGTAGATATTAAT  
GAATGCCAAGATTTCTAATAATTACCCTTGTACGGAGAATGCCATAACAAACCTGGCGAT  
TTTGATTGTTTCTGCCGTGCGGGTAGCCGTGGAATGCAACTATTCTGGAGGATGTCGG

OsWAKs-Supplemental Data 1[1].txt

AAGGACTTCTTACCTCTAAAAGCACAGCTGGCAATTGGTAGGGCACATATTATTCCAACCT  
TAGTTGCTGTTGCATCTTAAGATCTGCTTGATCTGGTCTGGACTTCTCAATAACATCAA  
TATAAAAACGTACTGGTGCTAAAATGCTTGCTTAAATCTTTTTTACTAATGATAAATC  
TTCGCTCTCTAGGAATTGCTGCATGTGTGTTGGCTGGCCTGTTTGCTTTCCTTGGATGGG  
AAGTGATTGGGCACAAAAGGAGCATTAGAAAACAAGCTTTGTTAAGACAGACTGATGAGT  
TTTTTCAACAACATGGAGGCCAATATTGCTAGAAATGATGAAAGCAGAAGGCAATATCG  
GGTTCACACTCTACAAGAGAGTGGAGATAGAGACCGCAACAAAAAACTTCAACAAGGCAC  
AAATCATCGGTGAAGGAGGGCAAGGAACAGTCTACAAGGCAGTCTTAGATGGAAGTGTG  
TCGCGATAAAAAAGTGCAAGGAGATTGACGAGAGTAGGAAGATGGACTTCATGCAAGAGT  
TGGTCATACTTTGTCGTGTCAACCATCCTAACATTGTCAAGTTGCTCGGCTGCTGCCTAC  
AGTTTGAGGGCGCTATGCTTGTCTATGAATTCGTGGAAAATAAACATTACAGGAGCTGC  
TTGACCTCCAGAGAAGCAAGAGGTTCCATGTCACGCTGGGAACCCGCCTAAGGATAGCTG  
CCGAATCAGCTGATGCACCTGGGCATCTCCACTCACTACCACACCCAATACTCCATGGTG  
ATGTAAAGCCAGCCAACATCCTTCTTGCTGAAGGATTGGTAGCAAAGGTGTCTGACTTTG  
GGTGTTCAACTATTGATGAGAAAAACACAATCTATGCTTAAAGGCACACCTGGGTATATTG  
ACCCAGAGTACCTGCTTGAGTATCAGCTCACAGCCAAGAATGATGTCTACAGTTTTGGTG  
TCATTCTTCTTGAGCTTCTAACAAGTAAGAGGCCATTGTCAAAGAAAGTAAGACATTGG  
CGTCAATGTTTCAGGAGGCTATGATGGATGGAACATTCCATGAGCTTCTTGATAGCGAAA  
TAATAGATGAAGCAAGCATGGGAGTCTACATCAGATTGCGGTTCTGGCGATTCAATGCT  
TGGCTCTTCTGGAATGTCAAGGCCGGTGATGGAGCAAGTCGAAAGGAGCTTCGTCGAT  
TAGCACTATCAGATGAAGTGCAGCAATGCCACAGCCGCTCTGGTTCTCGAGGGTCTCA  
ACTTTGCAGTGATGGGTAGCATGTGTACAACCTTCTTGTGTACACCGAGGGCAATAGCA  
CCGGAGTTTTATGATCTTGAGAAGAAAACCGTGATGAGCACAGAATTTGCCAGATGA

>OsWAK60, 4374. t00015, Chromosome 5, post-processing  
ATGGCGCCTAGCTTCGAAGTCGACTGCAACAATACGGCGAACGGTTTTAAGCCGTTGCTT  
GGAAATGTCTGAAGTCATATCCCTCAGCAATGGTCAGGCCCGGGTAATGAATCACGTATCT  
TCTTCTGCTACAACCGCACGTCCCGACAGATGAACCCTGCGGACGTGTGGTATCTGAAC  
CTCACGGGCACGCCCTACAGGCTCTCCGACTCGGCCAACAAGTTCACGGTCATCGGGTGC  
CGGACGCTGGCCTACACCTTCGACGATTACAACGTGGGCAAGTACATGAGCGGGTGCCTG  
TCCGTCTGCCGGCGAGGTGACTTGAGCAGCGCCATCAACGGCAGCTGCGTCGGGATAGGC  
TGCTGCCAGACAAACATCTCAACGGGCCTAAGCTATTACGAGGTGATGTTGACTACACC  
CTGAACACATCCGGGATCTACAACCGCACCCCTGTAGCTACGCGGTGCTCATGGAATCG  
TCTAGCTTACCTTCTCAACCACCTACCTAACTTCACGGGCGTTCAACACCTCCTATGGT  
GGCCAGGCTCCGCTGGTGCTTGATTGGGCTATCCGGACTGCTAACAACCTGCGTGGAAGCA  
CAAAAAAATCCTGCGTCTGACGCTGCAAAAGGTGACTATAGCGTCTGCCTCAACTCCACC  
AACGGACAGGATACATATGTAAGTCAAAAAAGGGATACCAAGGCAATCCCTACCTTCAA  
GATTCACACGGCTGTCAAGGTTCTGTTCTTCACTGCCAAATAATGAGCTTGAGCGCTCGA  
TCTCGGGAGAAACAGGTGAAGCTAAGGCGGATGAGCCTGTGTGTCCAGAGGGCCGAGCT  
CAACATTATGAGCTTCTGCGAAAGGGACGAAGCCACGAAGGTTGAGCTCAGCCCTTGGG  
GTGGTGGATCAGAGGAGTTGGAGCTCGAGCTCAAGGAAGGACATCATGTCTTTGCCAAG  
CCTACTGACCTCCCGGTTCTCATTTTCCCTGTTGGCAAGGAGCCATATAATAAATTTAAA  
GGATTTTACAGAGCAGAATATTTCAAAAAATAACATACAGTTGGGCGGGCTGCATGGAAGA  
AAAGATATTAATGAATGCCAAGATTCTAATAATTACCTTGTACGGAGAATGCCATAAC  
AAACCTGGCGATTTTGTATTGTTTCTGCCGTGCGGGTAGCCGTGGAAATGCAACTATTCT  
GGAGGATGTGGAAGGACTTCTTACCTCTAAAAGCACAGCTGGCAATTGGAATTGCTGCA  
TGTGTGTTGGCTGGCCTGTTTGCTTCTTGATGGGAAGTGATTGCGCACAAAAGGAGC  
ATTAGAAAACAAGCTTTGTTAAGACAGACTGATGAGTTTTTCAACAACATGGAGGCCAA  
CTATTGCTAGAAATGATGAAAGCAGAAGGCAATATCGGGTTCACACTCTACAAGAGAGTG  
GAGATAGAGACCGCAACAAAAAACTTCAACAAGGCACAAATCATCGGTGAAGGAGGGCAA  
GGAACAGTCTACAAGGCAGTCTTAGATGGAAGTGTGTCGCGATAAAAAAGTGCAAGGAG  
ATTGACGAGAGTAGGAAGATGGACTTCATGCAAGAGTTGGTCATACTTTGTCGTGTCAAC  
CATCCTAACATTGTCAAGTTGCTCGGCTGCTGCCTACAGTTTGAGGCGCCTATGCTTGTG  
TATGAATTCGTGGAAAATAAACATTACAGGAGCTGCTTGACCTCCAGAGAAGCAAGAGG  
TTCCATGCTACAGCTGGGAACCCGCCTAAGGATAGCTGCCGAATCAGCTGATGCACTTGGG  
CATCTCCACTCACTACCACACCAATCTCATGGTGATGTAAGGCCAGCCAACATCCTT  
CTTGCTGAAGGATTGGTAGCAAAGGTGTCTGACTTTGGGTGTTCAACTATTGATGAGAAA  
ACACAATCTATGCTTAAAGGCACACCTGGGTATATTGACCCAGAGTACCTGCTTGAGTAT  
CAGCTCACAGCCAAGAATGATGTCTACAGTTTTGGTGTCTATTCTTCTTGAGCTTCTAACA  
AGTAAGAGGCCATTGTCAAAAGAAAGTAAGACATTGGCGTCAATGTTTCAGGAGGCTATG  
ATGGATGGAACATTCCATGAGCTTCTTGATAGCGAAATAATAGATGAAGCAAGCATGGGA  
GTCTTACATCAGATTGCGGTTCTGGCGATTCAATGCTTGGCTCTTCTGGAATGTCAAGG  
CCGGTGATGGAGCAAGTCGAAAGGAGCTTCGTCGATTAGCACTATCAGATGAAGTGCAG

OsWAKs-Supplemental Data 1[1].txt

CAATGCCACAGCCGCTCTGGTTCTCGAGGGTCTCAACTTTGCAGTGATGGGTAGCATG  
TGTACAACTTCCTTGTGTACACCGAGGGCAATAGCACCGGAGTTTATGATCTTGAGAAG  
AAAACCGTGATGAGCACAGAATTTGCCAGATGA

>OsWAK61, 3015.t00018 Chromosome 6, pre-processing

ATGGGGCGAGGCGTGCGTCAGATCGCCTGTGCCACCTAACCCGCGATCTGACCGGTCTG  
TGACTGGTCACAGACCGGATAAACGAGTGCCTGACTGCGTTACATGCGGCGTGACACG  
CTCAGCCAAACCGCAATAAATGTGGTTAGGTGAGCCCCACTGTGCTCACCTAACCCATAC  
ACGCGGAGCAAAAACCCACGAGGGGTGCGGGCGCCTCGGCCCTCGGGCCGAGGGGGGTG  
CGGCCCCGACCCCTCGGGGGGACTAAGAGGAGGGCGAACGCATCACCTCGGGCCGACG  
TCCCTCGGGGTACCAGGCTACGTGTGCGATTGTGTCTGCCTCAAACCTCTAGTCATGAT  
ACTCCTGATCCCATGTCACCGACAAATATGGTTACGACGGTATTGTAAGAGCAGGCACAA  
TAGCATACTATAAACCACTATAAACACACATCGAGAAGAACAATTTGTAGCCAGCTGC  
AGCACAAATACAAGACACAATGTTTGTCTGATAAGTGGGACCAGGTATTACTAGTGTGGT  
ACATATTTATAAACAACTATTGTATAAATTGACTGTTAAATTAAGTATAGATGATTTGAA  
TCTAGTACTATTAACCTTGTCTAAACCTCTTTGCTCATTACCTGGGTAAGAAGTTAGGT  
CCCCATCGTTTGGTTTTTTATGGAATAAAAAATAAATTTATAGGTAAACCTTTTATATAGA  
TGTTCTTGGTGGCTTAAAAATCAATGTTGAAAAAGAACTATATTGAAAAATACACAAAA  
TCAAAAATTTAAATTTTGGCTTTTCTTTTACTGATTAGGCCATCCGATGGGAGCCTTAG  
TACTTGTGGCAACCAGCCTGATGCTGCTGATACTACAGCATAGTGGTGCATCTGACGGGG  
CTAGGGCTGGGTCTGGAAGTATCTGGCAGCCCCAGCCGATTGTCCAGCTCCAGCGAAGT  
GCGGCAACGTCAACATTCCTACCCGTTTGGCATAAGAGAAGGTTGCTTCCGACCGAAGG  
GCGGCTTTAATATCTCATGCAAGCAAGAACAAGCTTATATTGGGTGAGATTTTCTGATTA  
AAATAAATATTTTATCTTGATTTCTGTTAGCACGTTCTTCAAATTGTTAAACGGTGAAT  
TTCATGCGGAACTAAAAATTAATTTAAATATCAGATAAATTCATTTTCAAGTTTAAAA  
TAATTAACCTACTCTGTACTAACGGTTTTCTGTACTATACTTTATCAGACCGGACATT  
AGGGTCACGAATTTTGATGTAGTCCAGAGTGAGGCTCGCATCTGACCGATATACCATCA  
GGGACGGTAGCATGGAAGTACAACAATGAATTTGATCCAATTGCATGGACGTCCAGAGGA  
GGATTACGACTTGGTAATCACCATATGGTTTCCAGCGCCAAGAACAGATTACAGCAATC  
GGGTGTTCAACTGTTGCATTCTACGGCAGAGACAAAAATGGTAGCAATGGACAGTTT  
GATCAGTTTACCAGCTTATGTGGATCGTTCTGCTTCGACGAGGGTAGCATCGAAGACGGC  
CCAGAGTGCTCCGGCATGGGTTGTTGCCAAGTCCCCATTTCAACCAACCTTAGGAGGTTT  
AGTTTAGGATTCTATAATTATAACACAACCAAAAAAGTTCTTAATTTTAGTTACGCAGC  
TATGCGTTTCGTGGTCGAGAAGGATCAATTCAGTTCAAGAGTTCCTATGCCAAAGCAGAC  
AATTTTCATGGAGGAGCTCGCTCGTGGGATTCTTATAATTCTCCAGTGGATTGCTGGTAAT  
GAAACCTGCAAGGAAGCAGCCCTGAAGGAGTCGTATGCTTGCCTTGCCAATAACAGCAAA  
TGCATGTGATGATAGAGGCGCCGGGTACAGATGCAACTGCACCAAGGTTACGAGGGA  
AATCCCTACCTCAAAGACGGTGCCGAGGTGAGAATTAATTCATACGCATGTGTTACAGG  
TCATGGTTAGAATTGGGTCTTTTTATGAGATGGAGGGGATAAATTTGTTCAAAGGACTC  
CAACAAATAAATTTGATCACTCTCTCTCAAACACACACAGAGCAAGCTAAATTAATTATA  
TATGCACCCTATATATGCGAGTTGCTGTTCTCCATGGATTCAATGAAGTTATTATTATT  
GATTCCTCACTTTGTTTCAAGTTGTTAATATTGCAGACATCAATGAGTGCAACGCCACAAGA  
TTCCCGAATTTGCAAGGGATCTGCACTAACACCGATGGGAGCTACGACTGTAAGTGC  
CCACTAGGAACCTCACAGCGATGATCCAAAGAACAAGGAATGCGTCCCAAGTGAAGCTG  
GTCATTGGTAATATGTTTTTACGCTACATTTTTTCACTGCCAAAACCTTTTTCTCTAACT  
GTTTCATATTTACAGCGAATTGAGATGCAAACCATACAGTTTTTTTTTTCGACTATATATGT  
TGTTTTCTTAGCAAAAAATAACAGGTTGTTTTGTTTCTGAAATTTTCTACTTATCCGTTT  
CTATTCACCTAACCAATTCATTCCAACAAACGGAAACAACAAGTCTGTCAATGGGG  
CTAGTCGAGCTTATGATAGGTAATCATCCATTTCCAGGTATTTGCATCAGCATCATCTTC  
CTCATCATCTGTATCTCCACTCTGCTGATCAAGATTGAGAGAATGAAGCTGGAAAAAGAG  
AAGCAGAGGTTCTACGATCAGAACGGTGGCCACATATTATACCAGAAAATTATCTCAGGG  
CAAGTCAATACAGTGGAATATTCACAGAAGAGGTACTAAAGAATGCGACCAACAACCTTC  
GACAGCGGACAAAAGCTTGGCGCCGGTGGTCATGGCATTGTCTACAAGGGCATTCTCAGG  
GACAACAATGTCGTCGCCGTGAAGCGCTCCAACCTTCTCCACGTGACAGACGCCGAGGAA  
TTCGTGCAGGAGATCATCATGCTCTCGCATCAACCACCGGAACGTGGTCAGGCTCATC  
GGCTGCTGCCTGGAAGTTGAAGTGCCCATACTGGTCTACGAGTTCATCTCCAATGGCACT  
CTCTCCTACCTGATCCATGGCGATAGCAGGCGGTATGCTTCACTGAACTTCGTCTTAGG  
ATTGCTCAAGAATCAGCTGAAGCATTGGCATACCTGCACCTGTGACGAACCGGCCTATC  
ATCCATGGCGACGTGGAGTCTCTGAACATTATGCTCGATGATAGCTACACGGTGAAGGTG  
ACCGAATTCGGGGCATCAGGTGGCTGTCCAATGAAGCTGTGAGCAAATTCGATGGTG  
CAGGGAACCCGAGGGTACCTGGATCCGGATACCTGCAGGAGAGGAAGCTGACGGAGAAG  
AGCGACGTGTACAGCTTCGGCGTCGTGCTGCTGGAGCTGATCACTGGGAAGAAGGCGATC

# OsWAKs-Supplemental Data 1[1].txt

TACCGCCACGATGGCGATGGCGACTTCGAGAGCCTCGCAGGATCGTTCTGCGGGCGATG  
GAGGAGAGGGTGGAGAACATCTTGGACACAAGCTTGGCTGGTGCCAGCATGGAGGCGCTG  
CCCCTGCTCCAGGAGGTGCCAAGGTGGGAGTATGTGTCTGAGCGCCAAGGGGAAGGAG  
AGGCCATCCATGGCGGAGGTGACCGACATGTTGAAAGCTGTAAGAATTGCGTGGAGGGAT  
CTTCTGGTTTCATCGGAGTACAACGTGACGGAGGTTTTCGTCGACAGTTCAGAAGCTCCT  
CCATCTGGCAACCCATCTTCCGCTGTGTTCTGGACGCCGGACATGCAGTCTCTAGAAGTT  
GAAACTTTGAGGTGA

>OsWAK61, 2015.t00018 Chromosome 6, post-processing  
ATGGGGCGAGGCGTGCATCGCTGTCGCCACCTAACCCGCGATCTGACCGGCCAT  
CCGATGGGAGCCTTAGTACTTGTGGCAACCAGCCTGATGCTGCTGATACTACAGCATAGT  
GGTGCATCTGACGGGGCTAGGGCTGGGTCTGGAAGTATCTGGCAGCCCCAGCCGATTGT  
CCAGCTCCAGCGAAGTGCGGCAACGTCAACATTCCTACCCGTTTGGCATAAGAGAAGGT  
TGCTTCCGACCGAAGGGCGGCTTTAATATCTCATGCAAGCAAGAACAAGCTTATATTGGA  
CCGGACATTAGGGTCACGAATTTTATGTAGTCCAGAGTGAGGCTCGCATCCTGACCGAT  
ATACCATCAGGGACGGTAGCATGGAAGTACAACAATGAATTTGATCCAATTGCATGGACG  
TCCAGAGGAGGATTACGACTTGGTAATCACCATATGGTTTCCAGCGCCAAGAACAGATTC  
ACAGCAATCGGGTGTTCAACTGTTGCATTCATCTACGGCAGAGACAAAAATGGTAGCAAT  
GGACAGTTTGATCAGTTCACAGCTTATGTGGATCGTTCTGCTTCGACGAGGGTAGCATC  
GAAGACGGGCCAGAGTGCTCCGGCATGGGTTGTTGCCAAGTCCCCATTTCAACCAACCTT  
AGGAGGTTTCAGTTTAGGATTCTATAATTATAACACAACCAAAAAAGTTCTTAATTTTAGT  
TCACGCAGCTATGCGTTCTGTTGCGAGAAGGATCAATTCAAGTTCAAGAGTTCCTATGCC  
AAAGCAGACAATTTTCATGGAGGAGCTCGCTCGTGGGATTCTTATAATTCTCCAGTGGATT  
GCTGGTAATGAAACCTGCAAGGAAGCAGCCCTGAAGGAGTCTGATGCTTGCCTTGGCAAT  
AACAGCAAATGCATCGATGTGATAGAGGCGCCCGGGTACAGATGCAACTGCACCCAAGGT  
TACGAGGGAAATCCCTACCTCAAAGACGGCTGCCGAGTTGTTAATATTGCAGACATCAAT  
GAGTGCAACGCCACAAGATTTCCGAATTTCTTGCAAGGGCATCTGCACTAACACCGATGGG  
AGCTACGACTGTATTTGCATCAGCATCATCTTCTCATCATCTGTATCTCCACTCTGCTG  
ATCAAGATTGAGAGAATGAAGCTGGAAAAAGAGAAGCAGAGGTTCTACGATCAGAACGGT  
GGCCACATATTATACCAGAAAATTATCTCAGGGCAAGTCAATACAGTGGAAATATTACACA  
GAAGAGGTAATAAGAATGCGACCAACAATTCGACAGCGGACAAAAGCTTGGCGCCGGT  
GGTCAATGGCATTGTACAAGGGCATTCTCAGGGACAACAATGTCGTGCGCGTGAAGCGC  
TCCAATTTCTCCACGTGACAGACGCCGAGGAATTCGTGCAGGAGATCATCATGCTCTCG  
CAGATCAACCACCGGAACGTGGTCAGGCTCATCGGCTGCTGCCTGGAAGTTGAAGTGCCC  
ATACTGGTCTACGAGTTCATCTCCAATGGCACTCTCTCTACCTGATCCATGGCGATAGC  
AGGCGGTATGCTTCACTGAACTTCGTCTTAGGATTGCTCAAGAATCAGCTGAAGCATTG  
GCATACCTGCACCTGTGACGAACCGGCCTATCATCCATGGCGACGTGGAGTCTCTGAAC  
ATTATGCTCGATGATAGCTACACGGTGAGGTGACCGACTTCGGGGCATCACGGTGGCTG  
TCCAATGAAGCTGTGAGCAAAATTGCGATGGTGACGGGAACCCGAGGGTACCTGGATCCG  
GAGTACCTGCAGGAGAGGAAGCTGACGGAGAAGAGCGACGTGTACAGCTTCGGCGTCTG  
CTGCTGGAGCTGATCACTGGGAAGAAGGCGATCTACCGCCACGATGGCGATGGCGACTTC  
GAGAGCCTCGCAGGATCGTTCTGCGGGCGATGGAGGAGAGGGTGGAGAACATCTTGGAC  
ACAAGCTTGGCTGGTGCCAGCATGGAGGCGCTGCCCTGCTCCAGGAGGTGCGCAAGGTG  
GGGAGTATGTGTCTGAGCGCCAAGGGGAAGGAGAGGCCATCCATGGCGGAGGTGACCGAC  
ATGTTGAAAGCTGTAAGAATTGCGTGGAGGGATCTTCTGGTTTCATCGGAGTACAACGTG  
ACGGAGGTTTTCTGTCGACAGTTCAGAAGCTCCTCCATCTGGCAACCCATCTTCCGCTGTG  
TTCTGGACGCCGGACATGCAGTCTCTAGAAGTTGAAACTTTGAGGTGA

>OsWAK62, 2009.t00005, Chromosome 6, pre-processing  
ATGGCCTTCAACCTTGAAGGGCCTGAAAATGAGAGGAGCCTTTCCTTGAGCTTCTTGTGT  
GCCATGGAGGAGGGAAGACTCATGGACATTATAGGTCATCACATTCAAACCTGATGAGAAT  
GCTGGGGTGCTCGAGGAGGTTGCCAACCTTGCAAGCCGGTGCCTGGAGATGATCGGCAAT  
AACCGCCCGTCGATGAGAGATGTCGCTGACAAATTTGGCCGGCTGAGGAAGGTGATGCAG  
CACCCATGGGCGCAGCATGACCCGGAGGAGATGGTGCAACATTCAAAATAG

>OsWAK62, 2009.t00005, Chromosome 6, post-processing  
ATGGCCTTCAACCTTGAAGGGCCTGAAAATGAGAGGAGCCTTTCCTTGAGCTTCTTGTGT  
GCCATGGAGGAGGGAAGACTCATGGACATTATAGGTCATCACATTCAAACCTGATGAGAAT  
GCTGGGGTGCTCGAGGAGGTTGCCAACCTTGCAAGCCGGTGCCTGGAGATGATCGGCAAT  
AACCGCCCGTCGATGAGAGATGTCGCTGACAAATTTGGCCGGCTGAGGAAGGTGATGCAG  
CACCCATGGGCGCAGCATGACCCGGAGGAGATGGTGCAACATTCAAAATAG

OsWAKs-Supplemental Data 1[1].txt

>OsWAK63, 3009.t00012, Chromosome 6, pre-processing  
 ATGGACTGCTACTACAAGCTCCCAGTTGAAAACTAGCAATGCGTCTGCTGCTGTTTCATA  
 GGCCTCGTGATCTCCCTACAGTTCATGGCAGACGGCGCATCATTGCCGGACGATAGGTGC  
 CTAAGAAGTGTGGTGATGTTGACATTCTATACCCATTTGGGATTGGCGAAGGCTGTGCC  
 ATTGAAGGCTTTGTGCTTAGCTGCAGCAAGACAGAGGATGGACGTGGGGATGTGGCATT  
 TATGGCACCACGCCGGTGCTGAATATATCGCTGCGCTATGGTCAGGTTTCGGATGAAATCA  
 ACGTACATATCCTCGATGTGCTACAACCTCTCAACCAAGAATATGGACTACAAGAACTGG  
 CTCCTGAACCTCACAACCTCTCCGTTACCATCTCGCAGAAGGAGAACATATTCATAGTC  
 ATCGGTGCCAACACGGCCGCAACATGTTTGGTTACAGCCGCTACTCTACCGTGAGTTGA  
 TCTCTCTTGTAATTCACCATATATATTCTGCTGCTGCCAGTTTTAAATTTAATCTTCG  
 ATACGCTGGAGTAAAAGTGTAAAGAGTCTGTTTTGTGGTAATATATCATCCATAAAC  
 TCAACCGGATTTGGATGCAGATGCTAAATATGATCGGGTGCTTGTCTCAGTGCTCACCG  
 TATAATAGCTTCACAGCTCAAGATGGGTGCTGTGTCGGCATCGGCTGCTGCCAGGCCGTA  
 CTCAGCAACAACATTTCTACCACGAAGTGAATTCACCCCTTATACAACACCACAACG  
 TCTTACAACAACAGAAGCATCACGGACAGGGCAAGCTACTGTGGCTACGCTGTGGTGATG  
 GAGGCTGCTGCATTACAGTTCGGAACAGCATACCTGAACCTCAACGGCCTTTTGGGACGAG  
 CACAATGGCAGTGTCCCGGTGGTCTTGAAGTGGGTTGTGGGTAATGAGACATGTCAGGTT  
 GCCAAGCAAATGGGAGATAGATACGCATGCCGTAGCAAAAACAGCATGTGCATCGATTCA  
 TCCAGTGGCCCTACAGGTTACCTCTGCAACTGCACTGAAGGCTACCGTGGCAATCCGTAC  
 CTTCCCGATGGATGCCAAGGCTGTATTGCCAATTTACCTTGATTGAATTTTGTGATAT  
 ATAAGTACATATATACTACTCCCTCCGTTTCAGGTTATAAGACATTTTGACTTTTCGTTAA  
 AGTCAAATTACTTTAAGTTTGACTAATTTTATAGAAAAAAGTAGTAATATTTTAACTTA  
 AGACTAATATATTATAAAAAATTATTCAATTATAGATTTAATGAACTATGCTGGTGTG  
 TAAATATTCATATTTTTTTCTATTGAGTTAGTTAAATTTAAAGTAGTTTAACTTTGACC  
 AAAGTTAAATGTCTTATAACCTAAAACGGAGGGAATACTTTTTACTGTGTCTGTAGATA  
 TTGATCCCATGATGATTCAATCTTTGTAGAGCCAAACACTAAGTATCATGCTACTTTTAC  
 TGTGTCTGTAGATATTAATGAATGTGATGTTAACAATCCACCTCCATGCCCTGGCCGTTG  
 CAAGAACATACCTGGCAGTTTTACTTGTTCAGCCCTCACAATCCAGAACGGTGATACT  
 AGCTGTTAGTAAGTTGTCGTTCCCTAATCTTATAGATTTTTTGGCACACAAGTGGTTG  
 CAATAACAAAAAATTGATAAATTAATATGCAGGCCTAAGTGTGGAATTGTTGCCATGGC  
 AATGATCGTCACCTGCTCATACTTGGTCCGTGAACGGAAGAACTGGCCAATATCAAGAA  
 GAAGTATTTCCAACAGCAGCGTGGCATGCTTCTGCTGCAGGAGATAGGCTTAAAGCAAGG  
 GCAGAGCACTGCCTTACAATCTTCACTGAAGCAGAAGTATAGAAGCGACGAACAAGTT  
 CGAGGACAAGAAGCTCCTTGGCCGCGGTGGCCATGGCACTGTCTACAGGGGCATGCTCAA  
 GGACAGCCGTCTGATTGCCATCAAACGATGCATGTCGATGATTGACGACAGGCAAAAGAA  
 GGAGTTTGGCAAGGAGATGCTCATCCTGTCCAGATCAACCACAAGAACATCGTCAAGCT  
 CCTGGGCTGCTGCCTCGAAGTGGAGGTCCCAATGCTAGTCTATGAGTTTATCCCCAATGG  
 GACCTTGTTTCACTTCATTATGCGCGCAATGACTGCCGCAACATCCCCTTTTCTACTCG  
 AGTGCGAATTGCCATGAATCAGCCCAAGCACTAGATTACCTTCATTCAATCAGCATCGCC  
 TCCAATCATTACGGTGATGTCAAGACCTCCAACATACTACTGGACGAGAAGTATACCGC  
 AAAGATATCGGACTTTGGAGCCTCAATACTAGTGCCGACTGATGAGGCCAGTTTGTAC  
 CTTGGTGCAAGGAACCTGTGGGTACCTAGATCCCGAGTACATGCAGACGTGCCAATTGAC  
 AGATAAGAGCGATGTGTACAGCTTTGGCGTCTTACTGGAGCTGCTCACCGGCAAAAT  
 GGCCTTCAACCTTGAGGTCCTGAAAATGAGAAGAGCCTTTTATTGAGCTTCTGTGTGC  
 CATGAAGGAGGGAAGACTCATGGACATTATAGATCATCATTAGAGCTGATGAGAATGC  
 TGGGGTGCTCGAGGAGGTTGCTGACCTCGCGAGCCAGTGCCTGGAGATGATCGGCGATAA  
 CCGACCGTGCATGAGAGATGTCGCCGACAAGCTTGGCCGGCTGAGGAAGGTGATGCAGCA  
 CCCATGGGCGCAGCATGACCCGGAGGAGATGGAGAGCTTACTCGGGGAGTGTGCGGTGGC  
 TGGTTTGGAGATGGTTAGCACCGGAATTTACGATGGAGGGTGGAGCTGTGCAAGGCAT  
 TCTGGAGTCTGGGCGTTGA

>OsWAK63, 3009.t00012, Chromosome 6, post-processing  
 ATGGACTGCTACTACAAGCTCCCAGTTGAAAACTAGCAATGCGTCTGCTGCTGTTTCATA  
 GGCCTCGTGATCTCCCTACAGTTCATGGCAGACGGCGCATCATTGCCGGACGATAGGTGC  
 CTAAGAAGTGTGGTGATGTTGACATTCTATACCCATTTGGGATTGGCGAAGGCTGTGCC  
 ATTGAAGGCTTTGTGCTTAGCTGCAGCAAGACAGAGGATGGACGTGGGGATGTGGCATT  
 TATGGCACCACGCCGGTGCTGAATATATCGCTGCGCTATGGTCAGGTTTCGGATGAAATCA  
 ACGTACATATCCTCGATGTGCTACAACCTCTCAACCAAGAATATGGACTACAAGAACTGG  
 CTCCTGAACCTCACAACCTCTCCGTTACCATCTCGCAGAAGGAGAACATATTCATAGTC  
 ATCGGTGCCAACACGGCCGCAACATGTTTGGTTACAGCCGCTACTCTACCATGCTAAAT  
 ATGATCGGGTGCTTGTCTCAGTGCTCACCGTATAATAGCTTCACAGCTCAAGATGGGTG  
 TGTGTCCGATCGGCTGCTGCCAGGCGTACTCAGCAACAACATTTCTACCACGAAGTG  
 CAATTCACCCCTTATACAACACCACAACGTCTTACAACAACAGAAGCATCACGGACAGG

OsWAKs-Supplemental Data 1[1].txt

GCAAGCTACTGTGGCTACGCTGTGGTGATGGAGGCTGCTGCATTACAGGTTCCGAACAGCA  
TACCTGAACCTCAACGGCCTTTTGGGACGAGCACAATGGCAGTGTCCCGGTGGTCTTGAAC  
TGGGTTGTGGGTAATGAGACATGTCAGGTTGCCAAGCAAATGGGAGATAGATACGCATGC  
CGTAGCAAAAACAGCATGTGCATCGATTATCCAGTGGCCCTACAGGTTACCTCTGCAAC  
TGCCTGAAGGCTACCGTGGCAATCCGTACCTTCCCGATGGATGCCAAGATATTAATGAA  
TGTGATGTTAACAATCCACCTCCATGCCCTGGCCGTTGCAAGAACATACCTGGCAGTTTT  
ACTTGTTCAGCCCTCACAATCCAGAACGGTGATACTAGCTGTTAGCCTAAGTGTGGA  
ATTGTTGCCATGGCAATGATCGTCACCTGCTCATACTTGGTCCGTGAACGGAAGAACTG  
GCCAATATCAAGAAGAAGTATTTCCAACAGCACGGTGGCATGCTTCTGCTGCAGGAGATA  
GGCTTAAAGCAAGGGCAGAGCACTGCCTTCACAATCTTCACTGAAGCAGAAGTATAGAA  
GCGACGAACAAGTTTCGAGGACAAGAAGCTCCTTGGCCGCGGTGGCCATGGCACTGTCTAC  
AGGGGCATGCTCAAGGACAGCCGTCTGATTGCCATCAAACGATGCATGTCGATGATTGAC  
GACAGGCAAAAAGAAGGAGTTTGGCAAGGAGATGCTCATCCTGTCCCAGATCAACCACAAG  
AACATCGTCAAGCTCCTGGGCTGCTGCCTCGAAGTGGAGTCCCAATGCTAGTCTATGAG  
TTTATCCCCCAATGGGACCTTGTTCACCTTCATTCATGGCGGCAATGACTGCCGCAACATC  
CCCTTTTCTACTCGAGTGCGAATTGCCCATGAATCAGCCCAAGCACTAGATTACCTTCAT  
TCATCAGCATCGCCTCCAATCATTACGGTGATGTCAAGACCTCCAACATACTACTGGAC  
GAGAACTATACCGCAAAGATATCGGACTTTGGAGCCTCAATACTAGTGCCGACTGATGAG  
GCCCAGTTTGTACCTTGGTGCAAGGAACCTGTGGGTACCTAGATCCCGAGTACATGCAG  
ACGTGCCAATTGACAGATAAGAGCGATGTGTACAGCTTTGGCGTCGTTCTACTGGAGCTG  
CTCACCGGCAAAATGGCCTTCAACCTTGAAGGTCTGAAAATGAGAAGAGCCTTTTCATTG  
AGCTTCTTGTGTGCCATGAAGGAGGGAAGACTCATGGACATTATAGATCATCACATTCAG  
ACTGATGAGAATGCTGGGGTGCTCGAGGAGGTTGCTGACCTCGCGAGCCAGTGCCTGGAG  
ATGATCGGCGATAACCGACCGTGCATGAGAGATGTGCGCCGACAAGCTTGGCCGGCTGAGG  
AAGGTCATGCAGCACCCATGGGCGCAGCATGACCCGGAGGAGATGGAGAGCTTACTCGGG  
GAGTCGTGGTGGCTGGTTTGGAGATGGTTAGCACCGGAATTTACAGCATGGAGGGTGA  
GCTGTGCAAGGCATTCTGGAGTCTGGGCGTTGA

>OsWAK64 9634. t04636, Chromosome 6, pre-processing  
ATGGCCATGCCGCTCTTCTCGGCCTAGCTGTGCTTACTCTGCTGCTCGCGACGGCAGCG  
GCGGCGCTGCCGCCGCCGGGTGCCCGAGGACATGCGGCGGCGTCGCCGTGAGTACCCG  
TTCGGCATCGGGCAAACCTGCTCGCTGTCCGACGGCTTCAGCCTCGACTGCGTCCGCGAC  
ACCCCGCAGTCCGCCTCGGCCCGGTGAAGCAGCAGCAGACGGTGAGGGTGCTCGGCGTC  
GACCTGCTCCACGGCAAGATCCGGACGACGAACGCCATCGCGTCGAGTGCCTGGACGCG  
CGCACGGGCAAGCTGGTCAACACCTCGTGGGAGGGGCTCAACGCGGCGGCGCTGCCGTAC  
CGCTTCTCCGACGAGGACAACCGGTTCTTCGCCGTGCGCTGCAGCGGGGTGCTCCTCCTG  
CAAGGCACGGCGGCGGAGCCGACGACCGGGTGGTGATCGGCTGCATCTCGACATGCTTC  
GGCAACGCGAGCATCAGGACCGGCTCCTGCTCCAACATCGGGTGCTGCGAGACGGCCATC  
CCCAAGGGGCTCAACTCCTACTGCTCGCATGGAAGGATGCCCGGCGGCTCGCCGGTG  
AACCGCTGCTTCTACGCCACGCTGATGGAGGCGGCCAGCTTCAGCTTCGAGGCGGCGGAC  
GCGGCGGCGGACGGGTTCTACCGGAAGAGCAGCAACGGCACGGTTCCTGTTGCTCAGC  
TTCGTGGTGGGCGAGCAGACGTGCAAGGAGGCTCAGACGAGCGACACCTACGCGTGCCTC  
AGCGATCACAGCGTCTGCGTCGACGGTGCCCCAGGCTACGTGTGCAACTGCTCGCAGGGG  
TACACCGGTAACCCCTACCTCCCCAACGGATGCGTAGGTACGTACTTCTGTTTTTTAAT  
AGATAATGCTAATAACTTACAAAAATACATAAGATATAAATCATTATGTTTAAAGTACAA  
TTAGTGATAAAACAACCTTACAACAAAATAAATTATAATTACATCCGTTGAGTAACCCCTA  
CCTCCCCAACGGATGCATAGGTACGTACGTATATACGGAAGTGGATCTTCTCTTGAAGAA  
CCGTATCCTATAAACACAATGTTTTCTGTATATATTGTATACACTACTCCCTCCGTCC  
CGAAAAGGAGGTGTTTTAGCGTTGAAGCAATGTCTCACAAAGAGTGTGCTGAGAGCCT  
GTCTTCGTAGTTCAGACCTACTCTACCACAACCTCAACTAGTCTGAAATTCTGCCACACCA  
CTCACCGCTCTCTACCCCCAACCCAGCATACATGAATGTATAGTACTAGTAACGATAGAA  
GTATAGGACAGTACATGTTATTTTTGCAATGTCTTGGTACTCTCACCAGAAGCCAGAACG  
TCAAGTTTAAAGGGACAGAGAGAGTAGCTAATAAATATGATTGAATATTTTAGAAAAATT  
ATACATCTATCCTCGAATTCATCATACATATAAAAAAGAAAAAATACAAAAATTTTAAACAAG  
CGTATATGGTCTTATAACTGTTATTTTTACGACTAAAATAGAATGAATTTAAGGTTAAT  
ATTTATACATGAGGTATAGTACTGTTGAAAAATATATAGATCGCGAACATGCTCAGGACAT  
GAATGGTCTCTCTCCGTACACCTCGGTTATCCAAACGTAAGTATCCAACAGCTCGCGCA  
ATTGATAAAGATTATAGGTTTTCAGAAATTTGCTTGTCTTAAATATAAGGGCAAAATCCA  
ATTTCTTCGATGCAGATATCGATGAATGCGGTCCAGGAAAACATGGATGTCCGGATGGA  
ATGATTTGCACAACTTCCCGGCGGATACAATTGCTCGTGTCCGGAAGGGGAGTACAAG  
AGCAACAAAAATGGAGTATTGATCTGCGAGTCAGACCAGAAACGGTCTTCCCTCCCGGTC  
TCCGTGATCATAGTTATCGGTATGTAATAATTTTACACCCCTTCAATATCTTATACTTTT  
CATAATTTTTAACGTTTTAAATAAAATTGAAGTGAAACTTCTTTAACTTTGAATATCAAT

## OsWAKs-Supplemental Data 1[1].txt

AACCTTTAAAAACAATATAACAACATATATATTGTTTATAATTTTCTAAAGTACTATAATA  
AAAATAAAAAATATTTTATTTATCTATTATGTTATAATAAAAAATATAGTCAAAGATATATT  
TTGGAGACCTTATCAATATCTAAAACGTCAAAAAATATGGAACCGGAGTAAAGTATCTCCT  
CTAATTTACGACCAAAATGACTACTCAATGATACTCTACTCTTTTTAGCTTTTGTTATAA  
GTCAAACCTTCCCTTAAATTTGATCGTATTTTAAACACTTACTATTTTTAGTTTGACGCCA  
TTGACTTTTAGACACACATTTACCATTTGTCTTATTTAAAAATTTTATATAAAATATGTA  
AATATAACTCATGCTAATGATAAATAAATCACAATAAAATAAATGATAATTAATAAAATC  
TTTTAATAATAGGAATGACCAAACCTTATATCCTAAAGTCAATGAGAAAAACGGAGAAGTAT  
ACACGCTATAGCAATATTTTAAAGACAAAACAAATATATTATAAAAAATATATTTAATAG  
TGTATTTAGTAAAAAAAATTTGGACTTTTTAGATGCTACTAACTTTTTTATCTACTTAG  
GACAAATCAAAAACGTTTTTTATCGTAAAAAACCAAAAGCATATTAATTCTAGAACAAG  
GGAGGAAAAATTATTTTCCAGCCATGCATTAGAGTTTTCTTTCCCTTGATCTATCAATTA  
ATCAACTGAACCTCCACAAGTCATGGACTAAACATGCACAATCATTTTCTTTTATACTGA  
TAAAAGTAAACACATTGCTTCAGTTTGCAATTTTTTTTCTATTTGTTGGATTTACAGTAC  
TTAATTTAATTTATTGTCAGCCGATCGTAATCACATTTATAAACAGGCGCTTAGCGGTG  
GCGTCGTCTATCGCCGTGATAGCCATCTTGATCACATACCTGATCGCCGACGGCGAGCGC  
TCGCCGACGTCAAGCGCAAGTACTTCGAGCGGCACGGCGGCCGTCTCTACAGCAGAGC  
TGAGCACAAAGGCCGGGCAACACCTTCACCATCTACATGGAGGAGCAGCTCGAGCAAGCGA  
CCAACGGCTTCGACGACGGCAACATCCTCGGCCGCGGCGGCCACGCCACCGTCTACATGG  
GCATCGTGCCCGCGCGGCGGCGACGGCCTCGTCGTCGCCATCAAGCGGTGCAAGGTGATGG  
ACGAGACGACAAGAAGGAGTTCCGCAAGGAGATGCTGATCCTCTCCAGGTCAACCACA  
AGAACATCGTCAAGCTACTCGGCTGCTGCCTCGAGGTCAGCTCCCCATGCTGGTCTACG  
AGTTCTGTCGCCAATGGCACCTTTGTACCACCTCATCCATGGCGGCGGCGGCGGCGGCG  
ACGGCGGAGTCACTCTCGTTCGCCACTCGCCTCCGGATCGCGCACGAGTCGGCGGAGTCGC  
TCGCGTACCTGCACTCGTTCGCGTCGCCGCGGATCCTCCACGGCGACGTCAAATCCTCCA  
ACATCCTCCTCGACGAGAGCTTCATGGCGAAGGTGTCCGACTTCGGCGCCTCCATCCTGG  
CGCCCACCGACGAGGCCAGATGGTGACCATGGTGAGGGGACGTGCGGCTACCTCGACC  
CGGAGTACATGCGGACATGCCAGCTCACGGAGAAGACGACGTGACAGCTTCGGCGTCTG  
TGCTGCTCGAGCTCCTCACCGGCAAGAAGCCGCTCTGCCTCGACGGGCGGAGGAGGAGC  
GGAGCTTGTCGGCGAGGTTCTGGCGGCCATGGGGAGAGGAAGGTGGGCGAGATGCTGG  
ACGAGCAGGTGAAGCGCGAGGCGAGCGGCGAGTCGCTGGAGGAGATCACGCGGCTGGCTC  
TCGAGTGCTGCGAGATGTGCGGCGCCGACAGGCCGGCGATGAAGGAGGTGCGCGAGAGGC  
TGGGTGAGCTCGGGAAGCTGCATCAGCATCCATGGACGCAGGACGCCGTGAGCTCGAGG  
AGGCGAGGTGCTTGCTCCACGGCTCGCCGGAGTATCAGCTTTCAGCTAGGTACACCACTG  
GTAGTAGATAG

>OsWAK64 9634.t04636, Chromosome 6, post-processing  
ATGGCCATGCCGCTCTTCTCGGCCTAGCTGTGCTTACTCTGCTGCTCGCGACGGCAGCG  
GCGGCGCTGCCGCCGCCGGGGTGCCCGAGGACATGCGGCGGCGTCCGCCGTCGAGTACCCG  
TTCGGCATCGGGCCAAACTGCTCGCTGTCCGACGGCTTCAGCCTCGACTGCGTCCGCGAC  
ACCCCGCAGCTCCGCCCTCGGCCCGGTGAAGCAGCAGCAGACGGTGAGGTGCTTCGGCGTC  
GACCTGCTCCACGGCAAGATCCGAGCAGCAACGCCATCGCTCGCAGTGCTTGGACGCG  
CGCACGGGCAAGCTGGTCAACACCTCGTGGGAGGGGCTCAACGCGGCGGCGCTGCCGTAC  
CGCTTCTCCGACGAGGACAACCGGTTCTTCGCCGTCGGCTGCAGCGGGGTCGTCTCTCTG  
CAAGGCACGGCGGCGGAGCCGACGACCGGGTGGTGATCGGCTGCATCTCGACATGCTTC  
GGCAACGCGAGCATCAGGACCGGCTCCTGCTCCAACATCGGGTGCTGCGAGACGGCCATC  
CCCAAGGGGCTCAACTCCTACCTGATCGCCATGGAAGGATGCCGCGGCTCGCCGGTG  
AACCGTGCTTCTACGCCACGCTGATGAGGCGGCCAGCTTACGTTCCGAGGCGGGAC  
CGGCGCGGCGGACGGGTTCTACCGGAAGAGCAGCAACGCGACGGTTCCCGTGGTGCTCAGC  
TTCGTGGTGGGCAGCGAGACGTGCAAGGAGGCTCAGACGAGCGACACCTACGCGTGCCTC  
AGCGATCACAGCGTCTGCGTCGACGGTGCCCCAGGCTACGTGTGCAACTGCTCGCAGGGG  
TACACCGGTAACCCCTACCTCCCCAACGGATGCGTAGATATCGATGAATGCGGTCCAGGA  
AAACATGGATGTCCGGATGGAATGATTTGCACAAACTTCCCCGGCGGATACAATTGCTCG  
TGTCGGGAAGGGGAGTACAAGAGCAACAAAATGGAGTATTGATCTGCGAGTCAGACCAG  
AAACGGTCTTCCCTCCCGTCTCCGTGATCATAGTTATCGCGGTTAGCGGTGGCGTCGT  
ATCGCCGTGATAGCCATCTTGATCACATACCTGATGCGCCAGCGGCGAGCGCTCGCCGAC  
GTCAAGCGCAAGTACTTCGAGCGGCACGGCGGCCTGCTTCTCTACGACGAGCTGAGACA  
AGGCCGGGCAACACCTTACCATCTACATGGAGGAGCAGCTCGAGCAAGCGACCAACGGC  
TTCGACGACGGCAACATCCTCGGCCGCGGCGGCCACGCCACCGTCTACATGGGCATCGTG  
CCCGCGGCGGCGACGGCCTCGTCTGCGCCATCAAGCGGTGCAAGGTGATGGACGAGAC  
AACAAGAAGGAGTTCCGCAAGGAGATGCTGATCCTCTCCAGGTCAACCCACAAGAATC  
GTCAAGCTACTCGGCTGCTGCCTCGAGGTGACGCTCCCCATGCTGGTCTACGAGTTCGTG  
CCCAATGGCACCTTGTACCACCTCATCCATGGCGGCGGCGGCGGCGGCGGCGGCGGCGGCA



OsWAKs-Supplemental Data 1[1].txt

GTCATCTCGTTCGCCACTCGCCTCCGGATCGCGCACGAGTCGGCGGAGTCGCTCGCGTAC  
 CTGCACTCGTTTCGCGTCGCCGCCGATCCTCCACGGCGACGTCAAATCCTCCAACATCCTC  
 CTCGACGAGAGCTTCATGGCGAAGGTGTCGACTTCGGCGCCTCCATCCTGGCGCCACC  
 GACGAGGCCAGATGGTGACCATGGTGACGGGACGTGCGGCTACCTCGACCCGGAGTAC  
 ATGCGGACATGCCAGCTCACGGAGAAGAGCGACGTGTACAGCTTCGGCGTCGTGCTGCTC  
 GAGCTCCTCACCGGAAGAAGCCGCTCTGCCTCGACGGGCCGGAGGAGGAGCGGAGCTTG  
 TCGGCGAGGTTCTGTGGCGGCCATGGGGGAGAGGAAGGTGGGCGAGATGCTGGACGAGCAG  
 GTGAAGCGCGAGGCGAGCGGCGAGTCGCTGGAGGAGATCACGCGGCTGGCTCTCGAGTGC  
 CTGCAGATGTGCGGCGCCGACAGGCCGGCGATGAAGGAGGTGCGCGAGAGGCTGGGTGGA  
 CTGCGGAAGCTGCATCAGCATCCATGGACGCAGGACGCCGTCGAGCTCGAGGAGGCGAGG  
 TGCTTGCTCCACGGCTCGCCGGAGTATCAGCTTTCAGCTAGGTACACCACTGGTAGTAGA  
 TAG

>OsWAK65 9634. t04645, Chromosome 6, pre-processing  
 ATGACGAAGCATCATCCAATGCTGCTCTTCTTGGCCTAGCTTTGCTCGCCCTGCAGCCT  
 CTGATCGCGGCCGCATCACGGCGGCCGCCGCTCGCCGCTGTGTCCGAAGAAGTGGCGC  
 AACGTCGACATCGAGTACCCGTTTCGGCATCGGGCCAACTGCTCGCTGTCCGACGATTTT  
 AGCCTCGAGTGCCTCCACGACACCCCGCAGCTTCGCCTCGGCACCGATCGGCAGCAAGTG  
 GTGCCAGAAACACCTAGGGATATTTTGGCTAGCTTCAAAAGTAGTGGGCTGGACGATCT  
 GGGTTCAAGCCTCACCCCTTCTAATTATATTTGATATTAGGTCTTTTCGGGGCGGAGAC  
 AGGCCTAGAGCAGCTAAGGCTTGAGCCCTAGGCCTGTCTCCAAAAACTTGCTTAAATTTT  
 GTTGATTACCATGTAAATTTTTCAGAAAACTAAACTCCATTAGTCGAGCCCTACCTTA  
 TTCTTAGTCTTATATAATTTTGGCTCCGCCACTGGTCTTTCCCTAATATTCGTGTTCTT  
 TTTAGCAGGTGGTGGCCGTGCTCGACATCAACCTGCTCCACGGCAAGATCCGGATTGCCA  
 ACAGCATCTCCTGGCAGTGCAAGGACGAGAACGACCCAACCGGCGCCCCGTTGAAGAACA  
 GCTCGTGGATGGGCTCGACGTGACGGAGCTGCCGTACCGCTTCTCCTACGAGGACAACC  
 AATTCGTACCCGTGCGCTGCAACGTGCTCGTCTTGCTATCCGGAGAGGAGGCGTCAGTCG  
 ACCCGATCCTGAACGTCTGCATGTCCACATGCTTCGGCAACGGGAGCAACATCAGGAACG  
 GCTACTGCTCTGGCGCGGGATGCTGCGAGATGGCCATCCCCGTGGGACTCAAATCCTACC  
 GGCTTGAATTACGCGGGCCATTATTATTTAATAACAGCTGGTCGCCGGACAATTACACCT  
 GGTGCAGCCACGCCGTGTTGATGGAGGCTAAAAGCTTCAGCTTCGAGAGGGACTACGCGA  
 CAACCGATAAGTTTTTCAGAAACAAGAAGGACGCGTCCCCGTGCTGCTCAACTTCGCGG  
 CGGGCAGCGAGAGAAGTGCAAGGAAGCAAGAATGAAAGATACCTACGCGTGCCTCAGCGACC  
 ACAGCGCGTGCCTCGGCACGGCTGATGGCTACGTGTGCAACTGCACGAGTGGGTACAAGG  
 GCAACCCCTACCTCCCCGGCGGATGCACAGGTACGTCCGTCCGTCTCCAATACCACTGAT  
 TTGAGTTCGCCGATTTGTGGAGAGTTTTTTTTTAGAATGATTTGTGGGGAGTTGCACGTG  
 ATTTTTTATTTAATAATGAAAATCGGTACTAAGTATATCTTTTAGTCCTACTGAAGCCT  
 GTTTAGTTTCAGAAAAGAAAATTTTGGATGTACATCGGATGTTTGACCGGATGTGCGA  
 AGGGGTTTTTCGGATACGAATGAAAAAATAATTTTATAACTCGTCTGGAAACCGCGAGAC  
 GAATCTTTTGAACCTAATTAATCCGTCAATTAGGGCATGTACAATGGTGTGTTATTAGTGGT  
 CTCTCTCAATTGCCATGCAAGTAAATTTGATGACATGGAAGAAAGAGAAAGGAGTACGGT  
 TGTTATGCATGACAACGGCTCAGAGTCGATTCTTAGCATTTATTAGAGCAAATTTTGTG  
 CATGGTGTGAAAGAAAGGAAAGAAGAGTAAGAAAAAGTATTTTGATACATTAATTATTA  
 GAGACTATATTGTCCCCTAATGGGGTACCGAGGCCGAATTCGTATGCAGGTTTCATAGCT  
 NNNNNNNNNNNNNNNNNNNNNNNNNNNNNNNNNNNNNNNNNNNNNNNNNNNNNNNNNNN  
 AATATAAAAAAATCAAACGAAAAAAGCAGAAAAAGTAATAATAAATACTGTAAAAGA  
 AAGGTGATATAAATCTAAAAAAGAAGAACATCAGACAAGTGAGATAAGACAGAAACAAA  
 TTGTGAGCAAATCATTGAAAATATAACAAAGAAAATTTAAACCAATGTATATTTAAAAAC  
 AATAAATAATTAGAAGCCTAATATTAGACATGAAAAAGTAATAGAAAGAAAAAATAA  
 TGTAGAAAAGCGTGAAAGAAAATTTAAAAAAGCGACCATCTGTGAAAATAACCATAGGT  
 ATATTATTTATAACTAATAGTATTTATACAGAAATAATGAATAAAAAAGAATGGCCAACGA  
 TTTTGTCTAGGGAATTAGCCACCTAAAAATATAAATAAGTTTTTACAAAAATAAAATAAA  
 TGTTCAAAAGAGAGATTCAAAGATTCAAATGTGATGTTTTTAGGAAAAAATAAAGAAA  
 ATAAACCAAGCCTGAGTTGCATGTACATTTAACTGTACTATAATTTTTTTTTTACGGGAAT  
 GCTAGGGGACGGGATACCGTTCCCCAATGGGATACTCCTCCTCCACAAATGCGATTCTCA  
 CTCATCGACGCGGCCGACAGCCATCAGCGCGCGCCCATCCCTGTCCTTGTCCCCTACCGC  
 CGCTGCCGCCGCGCTCAGCATCCCTCGCCGCCGCGCCGTCCTCCCGCGCGCGCTCCCC  
 GTCCCCACCGCGCGCGCGCGCTCCCTACAGTCGTGCGCACGCCCGCACCCGCCACCG  
 TCGTCGTCCCTCGCCGCCGCGCGCGCGCTCCCTGCCGTGCGCGTCGCCATCCTCGT  
 CTACAGGGGGAGGGCTGCAGGTGGCCGGCAGCGCGTCGGGATGCTCCTCCCCAACGGGA  
 TGCACAATTATCTACTAGGAATCACCTGATACCTGGTAAGTATCATCCGATAACTCTT  
 AAGTATCAGCGATATATAAGTATAAATCATCTTATACCTGACATGATACCTCAGGATA  
 TCACACGATACGTGGTAGAAATCGTCTGATACCTGACAGGTATCACATGATACCTCGCGA

OsWAKs-Supplemental Data 1[1].txt

GTATTACACGATACGTGGTAGAAATCGCATGATACCTGATAAGTATCACATGATACTTTG  
 CAAGTGTCACTAAACATGTGTAGAATCGTCTGATACCTGATAGGTATCACACCTGATA  
 CCTACTCGGGATCATCCGTTTCGAAAACGGATTCCGTTATATAGCAGCCCTTTTTTAAGA  
 AACAAAGAAAAACGCAAAACAAACACTCACCATGTGCACGTATTCATCCCTGTGAACCTTA  
 TATGAATGCACACGTAACATGCATCTAACTGTATTATATAGTGTCTGATCTGGATTTCAAAA  
 AATTTTCTATATGCTTAGGACTTATTCGTTTCAAAGGAATTGTAAAGGAAAAGTACAGGA  
 ATAGGCAATCCTTTGAAATGGACACTATACTGTCATTCGTTTCAAAGGAATGCACCAAAC  
 TAAAAATTCCTATCCCTCCACTTTTTAGGGAAAAACAAAGGAAAAAATAATCCACTCCA  
 ACCCAATGTTTTCAATCCTTTGGATTGTTTGTACACAACCATAGAAAAATTTTCTATGT  
 TTTTCAATCCTTAAGTTTATACATGCATTTCTATACTATTTCTATGTTTTCTTTATTCCT  
 ATGTTTTAAAAATCCTACAAACCAACAAGCTCTTAATTTGGTCTGGTTCCAATGCCATC  
 CTATATGCAGATATTGACGTATGTGCTCCTGGAAATGACGGGTGTCCGGACGGGATGATT  
 TGCAGTAATTTTCCCGGCGGACACAACCTGCTCGTGTCCAGAAGGAGAGCACAAGAGCAAC  
 AAGAGTGGAGTACTCATCTGCGAGCCGGACCTGAAACGATCTTTGCCGGACCTGAAATTT  
 AAACGATCTTACCGGCTCCCGGTCTCAGCGATCATAGCTATCGGTACGTAACAAAAATGC  
 AATTGAGCAATTTTTTTTTTTCAGAGAAGGGTATATTTTTTACCCAGCCTCTATATTCAAC  
 CGAATATATGCAGTCATTTAAATTAGGAATTTAGCCTATCGAATATAAACTTAGCCCTT  
 AAATAAAAAATTTGCTCCCATAGAGATTTGACTCAGAATCTTAGGGTGCTACTCATGTCAC  
 TGTAACCATTAGGCTACATGCATTTTCAAAATGCAATTGAGCTTGCCCTGTCATCATCT  
 ACTCTAATATATGCACGCACAGCTAGCAGCATGGACTTTAATAAGTTTCGATAATTTTTTA  
 TATGCTTAATTTCAATATAGAATATATTGTGGTCAAATTTGTATTTTGAAGGCGCAAAAA  
 AAAGTCAAACATGATGTATATACATATAAAGTATTTCAAGCGTAACCTAGAGCAAGTTTA  
 ATAATATAGCCAACCACTAACTTTAAATCATCTATAGTCAATTTAATAGCCAACCTCATAC  
 ACATAGTTACCAATAAATATATATCGCATTAGTAATATGTGGTCCACCTATCATAAACA  
 TATTGTGTCTTGTAGTTTGTGATACAGCTGACTATAAATCTGTAACCCGCTACTCTTCTC  
 TTCTTATTTCTCTTCTCGATATATACTTGTCTTAGACTATCATATTTTTCCCTCGTAAA  
 CAGGCGTCACCGGTGGCATCGCTATCATCGTGATGAGCTTCTGAGCTCATACCTAGTAC  
 ACCAGCGAAGAGCGCTTGCCGACATCAAGCGCAGCTACTTCAAGCGACATGGCGGCCTGC  
 TTCTGTACGAGGAGCTGAACGCGAGGAAGAGCAACGCGTTCACCATATACACCGAGGAGC  
 AGCTCGAGCAGGCGACCAACGGCTTCGACGAGAGCAACGTCCTCGGCCGCGGCGGCCACG  
 GCACCGTGTACAAGGGCTGGGTGGCTGCAGCCTCCGACGACCTCGTTGTGCCATCAAGC  
 GGTGCAAGCTAATGGACGAGAGGAACAAGAAGGAATTCGGAAGGAGATGCTGATCCTCT  
 CCCAGGTCAACCACAAGAACATCGTCAAGCTACTCGGCTGCTGCCTCGAGGTGACGCTCC  
 CCATGTTGGTCTACGAGTACGTCCCCAATGGCACCTTGTAACAGCTCATCCATGGCGGAT  
 CTGCCGCGCCATCTCCTTCGCTTCCCGTCTCCGGATCGCCACGAGTCGGCGGAGTCAC  
 TCGCGTACCTGCACTCCTTCGCGTCCGCGCCGATCCTCCATGGCGATGTCAAGTCTCCA  
 ACATCCTCCTCGACGAGAGCATCATGGCCAAGGTGTCCGACTTCGGCGCCTCCATCTTGG  
 CTCCCAGTGACGAAGCCAAATGATGACCATGGTGCAGGTGAGAAATGCCAGAGGTTTT  
 CCGGCTAGCTCCACAAGGTAGTGGGTAGACGACCTGAGTTTAAAGCCTCACCTTTCTA  
 ATTACTCCCTCCGTTTCAAATATTTGACACCGTTGACTTTTTAGCATATGTTTGACCGT  
 TCGTCTTATTTAAAAAATTTTGTGAAATATGTAAAACCATATGTGTACATGAAAGTATAT  
 TTAACAATAAATCAAATGATATGAAAAGAATAAATAATTACTTAATTTTTTAAATATTAG  
 GTCATTTCTAATATTCGTGTCTTTTTTACCATGGTGCAGGGGACGTGCGGTTACCTCG  
 ACCAGAATACATCGACAGATGCCAGCTCAGGAGAAGAGCGACGTGTACAGCTTCGGCG  
 TTGTCTGTCTGAGCTGCTCACCGCAAGAAGCCGCTCTGCCTCGACGGGCGGATGAGG  
 GGCGGAGCTTGTGCGCGAGGTTCTTGGCCGCCATGAGGGAGAACAGAGCCGATTTGATAC  
 TGGATGAGCAGGTGAAGAGCGAGGCGAGCGGTGAGTTGCTGGAGGAGATCACGCTGCTGG  
 CTCTGGAGTGCCTGCAGATGTGCGGCGGCGACAGGCCGGCGATGAAGGAGGTGCGCGAGA  
 GGCTGGGCGGACTGCGGAAGCTGCACCAGCATCCATGGACGCAGGACGTGCTCGAGCTCG  
 ACGAGGTGCGGTGTTTGTCTCAGCGACTCGCCGAAAGTATCAGTTTTGAAGTGACGCCA  
 CAGTAGTAGCGGATACTGA

>OsWAK65 9634. t04645, Chromosome 6, post-processing  
 ATGACGAAGCATCATCCAATGCTGCTCTTCTTGGCCTAGCTTTGCTCGCCCTGCAGCCT  
 CTGATCGCGGCGCATACCGCGGCGCGCGCGCTGCGCGCTGTGTCCGAAGAAGTGGCGC  
 AACGTCGAGTCGAGTACCCGTTTCGGCATCGGGCCAACTGCTCGCTGTCGACGATTTT  
 AGCCTCGAGTGCCTCCACGACACCCCGCAGCTTCGCTCGGCACCGATCGGCAGCAAGTG  
 GTGGTGGCCGTGCTCGACATCAACCTGCTCCACGGCAAGATCCGGATTGCCAACAGCATC  
 TCCTGGCAGTGCAAGGACGAGAACGACCCAACCGGCGCCCCGTTGAAGAACAGCTCGTGG  
 ATGGGCCTCGACGTGACGGAGCTGCCGTACCGCTTCTCCTACGAGGACAACCAATTGCTC  
 ACCGTGCGCTGCAACGTGCTGCTTGTCTATCCGGAGAGGAGGCGTCAGTCGACCCGATC  
 CTGAACCTGCTGCTGCTTCCGCAACGCGGAGCAACATCAGGAACGGCTACTGC  
 TCTGGCGCGGGATGCTGCGAGATGGCCATCCCCGTGGGACTCAAATCCTACCGGCTTGAA

OsWAKs-Supplemental Data 1[1].txt

TTCAGCGGGCCATTATTATTTAATAACAGCTGGTCGCCGACAATTACACCTGGTGCAGC  
CACGCCGTGTTGATGGAGGCTAAAAGCTTCAGCTTCGAGAGGGACTACGCGACAACCGAT  
AAGTTTTTTCAGAAACAAGAACCGGCACGGTCCCGTCTGCTCAACTTCGCGCGGGCAGC  
GAGAAGTGCAAGGAAGCAAGAATGAAAGATACCTACGCGTGCCTCAGCGACCACAGCGCG  
TGCGTCGGCACGGCTGATGGCTACGTGTGCAACTGCACGAGTGGGTACAAGGGCAACCCC  
TACCTCCCCGGCGGATGCACAGATATTGACGTATGTGCTCCTGGAAATGACGGGTGTCCG  
GACGGGATGATTTGCAGTAATTTTCCCGGCGGACACAACCTGCTCGTGTCCAGAAGGAGAG  
CACAAGAGCAACAAGAGTGGAGTACTCATCTGCGAGCCGGACCTGAAACGATCTTTGCCG  
GACCTGAAATTTAAACGATCTTACCGGCTCCCGGTCTCAGCGATCATAGCTATCGGCGTC  
ACCGGTGGCATCGCTATCATCGTGATGAGCTTCTGAGCTCATACCTAGTACACCAGCGA  
AGAGCGCTTGCCGACATCAAGCGCAGCTACTTCAAGCGACATGGCGGCCTGCTTCTGTAC  
GAGGAGCTGAACGCGAGGAAGAGCAACGCGTTACCATATACACCGAGGAGCAGCTCGAG  
CAGGCGACCAACGGCTTCGACGAGAGCAACGTCCTCGGCCGCGGGCCACGGCACCGTG  
TACAAGGGCTGGGTGGCTGCAGCCTCCGACGACCTCGTTGTGCGCCATCAAGCGGTGCAAG  
CTAATGGACGAGAGGAACAAGAAGGAATTCGGGAAGGAGATGCTGATCCTCTCCAGGTC  
AACCACAAGAACATCGTCAAGCTACTCGGCTGCTGCCTCGAGGTGACGTCCCCATGTTG  
GTCTACGAGTACGTCCCCAATGGCACCTTGTACCAGCTCATCCATGGCGGATCTGCCGGC  
GCCATCTCCTTCGCTTCCCGTCTCCGGATCGCCACGAGTCGGCGGAGTCACTCGCGTAC  
CTGCACTCCTTCGCGTCGCCGCGGATCCTCCATGGCGATGTCAAGTCTCCAACATCCTC  
CTCGACGAGAGCATCATGGCCAAGGTGTCGACTTCGGCGCCTCCATCTTGGCTCCCACT  
GACGAAGCCCAAAATGATGACCATGGTGACGGGACGTGCGGTTACCTCGACCCAGAATAC  
ATGCAGACATGCCAGCTCACGGAGAAGAGCGACGTGTACAGCTTCGGCGTTGTCTGCTC  
GAGCTGCTCACCGGAAGAAGCCGCTCTGCCTCGACGGGCGGATGAGGGGCGGAGCTTG  
TCGGCGAGGTTCTTGCCGCCATGAGGGAGAACAGAGCCGATTTGATACTGGATGAGCAG  
GTGAAGAGCGAGGCGAGCGGTGAGTTGCTGGAGGAGATCACGCTGCTGGCTCTGGAGTGC  
CTGCAGATGTGCGGCGGCGACAGGCGGCGATGAAGGAGGTGCGCGAGAGGCTGGCGGA  
CTGCGGAAGCTGCACACGATCCATGGACGCGAGGACGTGTCGAGCTCGACGAGGTGCGG  
TGTTTGCTCAGCGACTCGCCGAAAGTATCAGTTTTGAAGTGGACGCCACCAGTAGTAGC  
GGATACTGA

>OsWAK66 9635. t00670, Chromosome 7, pre-processing  
ATGTATGACGATAGGAAGGATTTCAATAGGATCGACGGCGAGTTCAAGTCTGCCGTC  
GTGCTCGACGGGACGATCCGGAACGTCTACAACCTACGCGTGCCGGAGCTCGCGACGTACA  
CCAGCGACGGCCAGGGGTACCGGTGCAATTGCTCCAAGGGCTACGAGAGCAACCCCTAC  
CTCGACGACGGATGCACAGGTATATAAATGGGCCGGCCCTGACGGGGGGCGAGCAGTGCA  
ACCGCTCTGGGCCCCCGATCGTAGGGGCCAACAGGAGGAAGCAAGCCACAGTAGTAGC  
GTCGTAGCGATTTCTAACTCAACAGTCAACGTTCCCAATTCCTACGCGTACGTGAGTCA  
CAAGATTAACGCGCCACCGCGCGCTTGTACGTCCTTTGGATCGATCACCAGTCGTC  
ATTCTCCGATCCAGCTTCCGTTCCCGTTCCCAACCATGCGTTGATCAATTCACCGGTA  
TCGCATCGGCGCATCCGCGCGCTGTGAGTTGCCGTGCGCTGCCGCCACCAGCAGCGAC  
TGCACGAGCCCATATCTGCAAGTCTGCAACTACTATTGCTGAAGTGCATTGAAGCCTGAT  
GATCGAGAGGAGGTGAGCAGCGGGCTGCAAGGAGCAGCAACACCATCACATTGACATCGC  
TAATTGGTTTATTGAATTTCAATTTCTATTCCGTTGCCATCTGCACCTTGCTATGTTAG  
ATTTATGCTCTGTGTTAATTTAGTTAGAGTCTAGAGATTTGGACTTGGAGTTGGACG  
AAGTTGCCCTAGTGATCCGTTGCCGACTCACTTTATTGATCATTATTTAGATGGTATAT  
TAAGGGCCCCTTGTGTTTGTGCTCCTAGGCCATACAACTCAGGATTGGCTATATAGT  
CATCTTATTAACACAATGATTTTTAATTTATTTGACTCTCTCAATTAATTCCCATATAT  
TTGTCTGATGATCAAATGATGAAATTTCTTGCGATCGAATGAAAGATATCAACGAGTGC  
TTACACCCGAAAGAATACGGATGCTATGGAACCTGCATGAACACACCAGGAGGCTACACT  
TGCGTGTGCCCTCCTGGGACTAGTGGAATCCGACCGAAATGAATGGTTGCCACTCAAAG  
GACAAGTTCACCTTTGTTGTCAAAGTAGTTACAGCTTACATGCAATTAATTAAGTGGTCA  
CAATGCAAAATTGCGCTCAATTTCTGAAATAGAAATCTAGTGGGGGGGTAATGGGTATG  
CAATGGCGCCGTGTTCAAGGTGAGTGTCTTGTGTCAGTGTTCATGTGCTTCTGGCTCTA  
CCTTGGGCTCTAGAAAAGGAAGCTCATCAGAACGAAGCAGAAATCTTTGAGCAGAATGT  
TGGAGTGACCTGCAGCAGCAGATGCATTCCGGTGGAGGTGCCCGTGGGTTCAAGATATT  
CTCTATGGAAGAGCTCAAGAAGGCGACCAACATTTTCGCTGCCGGCCATGTTCTGGGCCG  
TGGTGGTCATGGTGTGCTACAAGGGTGTCTTGAAGACAAGACAATAGTAGCAATCAA  
GAAGTCAAAGATGATGAAGGAGGCCAGACCAAGGAGTTTGCAGAGAAACGTTTCATCCT  
CTCTCAGATCAACCATCGGAATGTGCTCAAGCTCCTTGGTTGCTGCCTTGAAGTTGAAGT  
GCCCATGTTGGTCTACAAATTCGTCTCAAATAACACCCTCTACCACTACATCCATGGGAA  
GAACCCCAAGCTGACATACCACTTGATATTGCTCTTCAAATAGCTGCAGAGTCTGCCG  
AGGCGCTCCTACATCATCTGCTTACCAGCCAACCTCCATGGAGATGTCAAGA  
TGGCAATATCCTGCTTGATGACAAGCTCAGCGCCAAAGTTTCTGATTTTGGGGCATCAA

OsWAKs-Supplemental Data 1[1].txt

AGCTACCACCAACTGATGAGATCGAGATCGCAACGTGGGTGCAGGGAACCTTGCAGTACT  
TGGACCCCGAATACCTTATGACACGCCAATTGACCGATAAGAGCGATGTATACAGTTTTG  
GTGTCATCGTCTGGAGCTTCTAACTAGGAAGAAAGTATTGTAATTGGACGGGCCAGAGG  
AAGACAGGAGCCTGGTTTCATGCTTCACCACAGCAGTGAAAGTTGGTCGTCATTAA

>OsWAK66 9635.t00670, Chromosome 7, post-processing  
ATGTATGACGATAGGAAGGATTTCAATAGGATCGACGGCGAGTTCGAAGTCGTGCCCGTC  
GTGCTCGACGGGACGATCCGGAACGTCTACAACCTACGCGTGCCGGAGCTCGCGACGTACA  
CCAGCGACGGCCAGGGGTACCGGTGCAATTGCTCCAAGGGCTACGAGAGCAACCCCTAC  
CTCGACGACGGATGCACAGATATCAACGAGTGCTTACACCCGAAAGAATACGGATGCTAT  
GGAAACTGCATGAACACACCAGGAGGCTACACTTGCGTGTGCCCTCCTGGGACTAGTGGA  
AATCCGACCGAAATGAATGGTTGCCACTCAAAGGACAAGTTCACCTTTGTTGTCAAAAAA  
AGGAAGCTCATCAGAACGAAGCAGAAATTTCTTTGAGCAGAATGTTGGAGTGATCCTGCAG  
CAGCAGATGCATTCCGGTGGAGGTGCCCGTGGGTTGAGGATATTCTCTATGGAAGAGCTC  
AAGAAGGCGACCAACATTTTCGCTGCCGGCCATGTTCTGGGCCGTGGTGGTCATGGTGTT  
GTCTACAAGGGTGTCTTTGAAGACAAGACAATAGTAGCAATCAAGAAGTCAAAGATGATG  
AAGGAGGCCCCAGACCAAGGAGTTTGCAGAGAGAAACCTCCTTGGTTGCTGCCTTGAAGTTG  
AAGTGCCCATGTTGGTCTACAAATTCGTCTCAAATAACACCCTCTACCACTACATCCATG  
GGAAGAACCCCCAAAGCTGACATACCACTTGATATTGCTCTTCAAATAGCTGCAGAGTCT  
GCCGAGGCGCTCTCTACATGCACTCATCTGCTTACCAGCCAACCCTCCATGGAGATGTC  
AAGATGGCAAAATATCCTGCTTGATGACAAGCTCAGCGCCAAAGTTTCTGATTTTGGGGCA  
TCAAAGCTACCACCAACTGATGAGATCGAGATCGCAACGTGGGTGCAGGGAACCTTGCAG  
TACTTGGACCCCGAATACCTTATGACACGCCAATTGACCGATAAGAGCGATGTATACAGT  
TTTGGTGTCTCGTGTGGAGCTTCTAACTAGGAAGAAAGTATTGTAATTGGACGGGCCA  
GAGGAAGACAGGAGCCTGGTTTCATGCTTCACCACAGCAGTGAAAGTTGGTCGTCATTAA

>OsWAK67, 3459.t00011, Chromosome 7, pre-processing  
ATGTGGTGGATGGTGTGAGGGCAGTAGCAGTATCAGGGGCCCTGCTGCTGCTTGTGGTT  
GTGGGTTCTTCCGCCGCCGGTGCCGGTAGTGGCAGCTGCCAGACAAGGTGCGGCGACGTG  
GACATCCTGTACCCATTCCGGCATCGGCCCAACTGCTCCCGCGGCGTTGGGTTTCGAGATC  
GAGTGCAATACGAGGAACGGCAGCGGCGACTTGGTGCCGACCCTGGCGGCCACCAGCTTG  
AGCATCGTGAGAACCTGTCCGTGGAGTGCCTCCAATGGCGAAGGTGATGCTGCCGGTG  
GCATACAAGTGCTACAACGACCCCAACAAAAACCAAGATTTCAACGGCGAGGTAGAGCTG  
AACAAGACCGGCGTGTACCGCATCTCCGATGAGCTGAACATGCTGGTCGTCTCTGTCTGC  
AACACCATGGTGTACACCAAGAACGGCAACAGTGAGGGCGGCCTATACCCGTACCTCTAC  
TACACCGGCTGCATCGCCTACTGCAACGACTCTAGGAGCGCACAAGACGGCAAGTGCGCC  
GGTGCCGGCTGCTGCCATGTGACATCCCCGGTGGCCTACCGACAACACCCTCGTCTTC  
GACTCGTGGAACCGTACCAAGTAG

>OsWAK67, 3459.t00011, Chromosome 7, post-processing  
ATGTGGTGGATGGTGTGAGGGCAGTAGCAGTATCAGGGGCCCTGCTGCTGCTTGTGGTT  
GTGGGTTCTTCCGCCGCCGGTGCCGGTAGTGGCAGCTGCCAGACAAGGTGCGGCGACGTG  
GACATCCTGTACCCATTCCGGCATCGGCCCAACTGCTCCCGCGGCGTTGGGTTTCGAGATC  
GAGTGCAATACGAGGAACGGCAGCGGCGACTTGGTGCCGACCCTGGCGGCCACCAGCTTG  
AGCATCGTGAGAACCTGTCCGTGGAGTGCCTCCAATGGCGAAGGTGATGCTGCCGGTG  
GCATACAAGTGCTACAACGACCCCAACAAAAACCAAGATTTCAACGGCGAGGTAGAGCTG  
AACAAGACCGGCGTGTACCGCATCTCCGATGAGCTGAACATGCTGGTCGTCTCTGTCTGC  
AACACCATGGTGTACACCAAGAACGGCAACAGTGAGGGCGGCCTATACCCGTACCTCTAC  
TACACCGGCTGCATCGCCTACTGCAACGACTCTAGGAGCGCACAAGACGGCAAGTGCGCC  
GGTGCCGGCTGCTGCCATGTGACATCCCCGGTGGCCTACCGACAACACCCTCGTCTTC  
GACTCGTGGAACCGTACCAAGTAG

>OsWAK68, 3459.t00009, Chromosome 7, pre-processing  
ATGAAGGTAAGGATCTAGCCACGGTTGTGACGGATTGGTTGCACCTACCGGATCTAGCC  
GTGCGCTGATCGCCACGAGCCGCCTCACGCCGTGCCTGGCCACATTGCGTCTTCGCCCT  
TTGTCATCCCTGCACAGCTGCACTGCAACGCCACGCTGGGTGCGGCGCTGTGCCACCT  
GTAACAGCCCTCCCTCCAGAACCAGCGTAGCCAGCCCAACCAACGAGCGGGCCCACTTAC  
ACACACCACCCCACTTACACTTTTCGTCTCTGCTTCTGTGTAAGGGTTAACCCTGGGAGTG  
ATGTCGTTGGAGGGAAGAGGCCTTATAAGTCGGTTCCACTCGTGCTAACTAGCAAGGTG  
GTAATAACATGCGCACATAGCTCACATGGGCCACACAGGCCTAATCCTTATTGGGCCGG  
GATGTCACACACCTCTCTACATGAGTGGTGGCTCGCCGCTGGGAAAGATTCCCTATTG  
CCGTGATCCCGGCTGCTCCGTGCGCGGTGAGTTGAAGATGGGTCTGGGGGATATGGGTG  
GGGCGGCGGCTAGGGCTTTACCCCCGAGCTGCCCGCGCGGGAGGGCAACACAGGGCGTA

OsWAKs-Supplemental Data 1[1].txt

GTTTGCTAGGGATAATATAATCCAAGGCGCGTTGATTTTTTTGGAGAAATATTGAATC  
 ATTTGATTATAGAAATATTTGTTGATGTTAATAGGATGCACTCGTAGAAGTTACCCATTA  
 TTACGTAAGAATAAAATTTTCATATTAATTGGAGAGAAAATTCAACAATAATCCATCTT  
 TGTGAAGTATCTTAAATCCTATGAAAAGGAGAGAATTCCTATACTTTCAAAAGGAAAAA  
 GAAAGGAGGTTTGAATTCCTCCACTTTGTTAGGTGTGTTGTATCTATCTCTCTCCCC  
 TAACATATTCATGTGATCTAATAACTCAAGTTTCACAACTGTATGTTGAAATTTCTTAG  
 TTTTTCACGTGTTTTCTATTTCTGCGTTTTTTGTTCCCTTTGTTCCAAAAGAGTTGGAA  
 TAAAATTGAATACCCACAAAAGGAAAGCCCAATTTATTGGATTAGCATGACAATAAATCC  
 AATTCGTAACAAATCTAATCCCTAACATCCATGCATAACACGCATTAAAAATATGTATT  
 AGTCCATATTTATGTTTGAATTAATACCCAAATTGAATTCATGTTGAGATCTAGCTCCT  
 AAATTTAAGTAGTTATTCTAAGAGAGTTTGCAATTGAATTCTACTTTGAGATCTTTTTCC  
 CTGTTAAGGTGAGAATTTCTAGTATTTCTTTTTCCAGATTATAGTGTGGGAATTTTTAG  
 TTTTCGTATGCCCTAAATTTAGCTTTTTTAACCTTTAGAATCATCAGTAACTAAACCAAA  
 ATGGTAATAACAATTGACATGAATTTGTTTTCTTTGTAGGTGTCTGCTTGGGTTTTCT  
 TCCTGATTGTCACTTTTCTTATCACACTTGTGATGTTTCAAAAGCAGAAAATGAATGAAT  
 ATTTCAAAAAGAATGGTGGTTCAATACTACAGAAAGTGGACAATGTCAAGATTTTTTCCA  
 AAGATGAGCTAAAAAGATCACAAGAACAATTGAGAGTTCTTGGTCAAGGAGGCTTTG  
 GTAAGGTATACAAGGGGACTCTTGGAGATAATACTATTGTCGCTGTGAAGACCTCAATTG  
 AGGTAAATGAAGCACGAAAGGATGATTTACAAAATGAGGTAAATTATTCAGTCGCAATGA  
 TGCACAACAACATTACAACTTTTGGTTGTTGCTTGGAGGTGGATGTTCCGATGTTGG  
 TATATGAATTTGCGGCTAATGGCAATCTGCAAGATATTCTCCATGGTGATGGCAATATCC  
 CTCTACCATTACACTTACGCCTAGACATTGCAATTGAATCTGCCGAAGGTCTAAGATACA  
 TGCCTCTCACTAATCGTACCATACGACATGGCGATGTCAAACAGCCAACATACTTC  
 TAACGGATAAGTTTCATCCCTAAGATATCAGACATTGGAACCTTCAAGCTTCTTACTGTAG  
 ACAAAGACTTTACCATGTTTGTGGTAGGAAGCATGGGCTACATAGACCCAGTGTTCATA  
 AGACTGGTCATTTAACACAGAAGAGTGATGTGTATAGCTTTGGAGTTGTAATCTTGAAC  
 TCATAAGTAGAAAAGCCAACAATATATGGTGAAAATTGTAGCCTGATCATTGAGTTCCAGC  
 AGTCCTACGATAAAGAGAATAGTGGGAGAATGATGTTGACAAGGATATTGAAATTGAAG  
 AAGACATCCTCATCTTGAAGAAATTGGCAGGCTGGCAATGGAGTGTGTTGAAAGAAAAGG  
 TTGAAGAACGACCTGATATGAAGGAGGTAGCAGAACGACTAGTGATGCTGCGAAGATCTA  
 GGAAGGGTGGGCAAGGAAGTTATAGTATAAGCCCTCAAACTTTGAGGAGATCAGCATCG  
 AGGGGACTCCTAAGAGCTTTGGTGCTGAAATCAGTGAAAGTAGCAATGCGGCGTTTTCTG  
 CACCAGCCACTCCAGCCAATAA

>OsWAK68, 3459. t00009, Chromosome 7, post-processing  
 ATGAAGAAAATGAATGAATATTTCAAAAAGAATGGTGGTTCAATACTACAGAAAGTGGAC  
 AATGTCAAGATTTTTTCCAAAGATGAGCTAAAAAGATCACAAGAACAATTGAGAGGTT  
 CTTGGTCAAGGAGGCTTTGGTAAGGTATACAAGGGGACTCTTGGAGATAATACTATTGTC  
 GCTGTGAAGACCTCAATTTGAGGTAAATGAAGCACGAAAGGATGATTTACAAAATGAGGTG  
 GATGTTCCGATGTTGGTATATGAATTTGCGGCTAATGGCAATCTGCAAGATATTCTCCAT  
 GGTGATGGCAATATCCCTCTACCATTACACTTACGCCTAGACATTGCAATTGAATCTGCC  
 GAAGGTCTAAGATACATGCACTCCTCACTAATCGTACCATACGACATGGCGATGTCAAA  
 CCAGCCAACATACTTCTAACGGATAAGTTTCATCCCTAAGATATCAGACATTGGAACCTCC  
 AAGCTTCTTACTGTAGACAAAGACTTTACCATGTTTGTGGTAGGAAGCATGGGCTACATA  
 GACCCAGTGTTCCTAAGACTGGTCAATTTAACACAGAAGAGTGATGTGTATAGCTTTGGA  
 GTTGTACTACTTGAATCATAAGTAGAAAGCCAACAATATATGGTGAAAATTGTAGCCTG  
 ATCATTGAGTTCAGCAGTCTACGATAAAGAGAATAGTGGGAGAATGATGTTGACAAG  
 GATATTGAAATTGAAGAAGACATCCTCATCTTGAAGAAATTGGCAGGCTGGCAATGGAG  
 TGTTTGAAGAAAAGGTTGAAGAACGACCTGATATGAAGGAGGTAGCAGAACGACTAGTG  
 ATGCTGCGAAGATCTAGGAAGGGTGGCAAGGAAGTTATAGTATAAGCCCTCAAACTTT  
 GAGGAGATCAGCATCGAGGGGACTCCTAAGAGCTTTGGTGCTGAAATCAGTGAAAGTAGC  
 AATGCGGCGTTTTCTGCACCAGCCACTCCAGCCAATAA

>OsWAK69, 2123. t00006, Chromosome 7, pre-processing  
 ATGAATCTGCAGGCACAATATAACAACATATTCTGTGCCACTCATAT  
 GGGAGACTGGTATGAGAAAATTTCACAATCTTTTAGGGATACTGCAAAATGAAGTATTGGC  
 AAAAGCAGATATTGATCCAAATGTTAGGTGCTTCAACAAGAAGGCAGATGAAGCACATCAC  
 AAACAACACGGCACTGTCTGGGAAAAGGAGGTTTTCTGTGGTGTACAAGGGAAAACCT  
 TGATAATGGCCGTTCACTGGCAGTGAACAATATAATTGGAGAACACAGGAAAAGGAGTT  
 CACAAAAGAAGCGATCATACAGTCCCAGTGTAGCCATAGGAACATTGTTAGGTTATTGGG  
 TTGTTGTGTGGAGGCAGATGCTCCAATGCTGGTCACTGAGTTTGTCCCAATGGGAACCT  
 TTCTGAACCTTCTGATGGGAAGAGTGGCAAGCTTCTGTCTCATTAGAGACACGCTTCCA  
 GATTGCATTGGATGTAGCAGAAGCACTTGTATATATGCATTGCTCCCAAAATCATCCAAT

OsWAKs-Supplemental Data 1[1].txt

CCTTCATGGAGACATCAAACCATCAAACATACCTTCTAGGTGACAAGCATGTGGCGAAGCT  
ATGTGACTTTGGAATATCTAGGCTTCTCTGTATGGACAATGATGAACACACGGGCTTTGT  
TATAGGAAGTAAAGGATACATGGATCCAGTGTACTGTGAGACTGGACGACTAAGCCCAA  
ATGTGATGTCTACAGTTTTGGGGTTGTTCTTTGGAGCTCATCACCAGAAAGAAAGGGAT  
TGATGACCAGAGCAGAAATCTAGCGGGAATGTTTGTCTCGCTCAAGTAGAGATAAAAGACA  
TGAACATTTTGACAAGGAAATTGCAGCCGATGAGAATATAGACTTTATAGAGGAAATTGC  
AAATCTTGCACCTTGATTGTTTAAAGTCTGAAATAGAAGATCGGCCGCAAATGAAAGAAGT  
TTTGAAACAGCTTTGGAGTATCAAAAGGTGAGAGATATTGAGACAGGAGAGAAGGCTTGC  
AGAGTTGAGAGAGAGAAGGATCATGACATTAAGGGAAATAAAGGTGATGTTGCGTGGATC  
TGGCTTTGAAAGATTTGTTACAAAAGCGACATAG

>OsWAK69, 2123.t00006, Chromosome 7, post-processing  
ATGAATCTGCAGGCACAATATAACAACATATTCTGTGCCACTCATATGGGAGACTGGTATGAGAACTTTCA  
CAATCTTTTAGGGATACTGCAAATGAAGTATTGGCAAAAGCAGATATTGATCCAAATGTT  
AGGTGCTTCACAAGAAGGCAGATGAAGCACATCACAAACAACACGGCACTGTCCTGGGA  
AAAGGAGGTTTTCTGTGGTGTACAAGGGAACCTTGATAATGGCCGTTCAAGTGGCAGTG  
AAACAATATAATTGGAGAACACAGGAAAAGGAGTTCACAAAAGAAGCGATCATACAGTCC  
CAGTGTAGCCATAGGAACATTGTTAGGTTATTGGGTTGTTGTGTGGAGGCAGATGCTCCA  
ATGCTGGTCACTGAGTTTGTCCCAATGGGAACCTTTCTGAACCTTCTGCATGGGAAGAGT  
GGCCAGCTTCTGTCTCATTAGAGACACGCTTCCAGATTGCATTGGATGTAGCAGAAGCA  
CTTGATATATAGCAATTGCTCCCAAAATCATCCAATCCTTCATGGAGACATCAAACCATCA  
AACATACTTCTAGGTGACAAGCATGTGGCGAAGCTATGTGACTTTGGAATATCTAGGCTT  
CTCTGTATGGACAATGATGAACACACGGGCTTTGTTATAGGAAGTAAAGGATACATGGAT  
CCAGTGTACTGTGAGACTGGACGACTAAGCCCAAAATGTGATGTCTACAGTTTTGGGGTT  
GTTCTTTTGGAGCTCATCACCAGAAAGAAAGGGATTGATGACCAGAGCAGAAATCTAGCG  
GGAATGTTTGTCTCGCTCAAGTAGAGATAAAAGACATGAACATTTTGACAAGGAAATTGCA  
GCCGATGAGAATATAGACTTTATAGAGGAAATTGCAAAATCTTGCACCTTGATTGTTTAAAG  
TCTGAAATAGAAGATCGGCCGCAAATGAAAGAAGTTTTGAAACAGCTTTGGAGTATCAAA  
AGGTGAGAGATATTGAGACAGGAGAGAAGGCTTGCAGAGTTGAGAGAGAGAAGGATCATG  
ACATTAAGGGAAATAAAGGTGATGTTGCGTGGATCTGGCTTTGAAAGATTTGTTACAAA  
GCGACATAG

>OsWAK70, 2123.t00010, Chromosome 7, pre-processing  
ATGACTTCCTCAGAAAAGTATTCCATGCATTTTATTGGCTTTGCACATTATAAAGTACAG  
ACTAATAATAAATACAGTGCTTTGAATAATGCACCATCTTCACGAATTTTCAGGCACAAA  
TATAACCACATCTTCTGTGTCACTGATATGGGAGATTGGTATGATAAACTTTTACAATCT  
TTTAGGGATACTGCAAAAGGATATTGGCAAGACAGATATTGATCCAAATGTTAGGTGC  
TTCCCAAAAAGACAGATGAAGCGCATCACCAACAACACAGCACTACCCTGGGAAGAGGA  
GGGTTTTCTGTGGTGTACAAGGGTAGGCTCGACGATGGTCGTTCAAGTGGCAGTGAAACAA  
TATAATTGGAGAACACAGAAGGAGTTCACAAAAGAGGTGATCATACAGTCTCAGTGTAGC  
CATAAGAACATTGTTAGGCTATTGGGCTGTTGTGTAGAGGCCGCTGCTCCGATATTGGTC  
ACCGAGTTTGTCCCAACGGAAACCTTTCTGCCTTCTACACGGCAACAGTGGACTGCTTC  
CTGTACATTAGAGACACGCTTACAGATTGCGCTGGATGTAGCAGAAGCACTTGTATATA  
TGCAATTGCTCCCAAGTTATCCAATCCTTCATGGAGATGTCAAACCGTCAAACATTCTTT  
TGGGTGACAAGGGTGTAGCGAAACTGTGTGACTTTGGAATATCAAGGCTGCTCTCTATGG  
ATAGTGATGAATACACAGGATTTGTTATCGGAAGTAAAGGTTATGTGGATCCTGTTTTCT  
GCCAGACTGGGCGATTAAGCCAAAAATGCGATGTCTACAGCTTTTGGGTGGTTCTTTTAG  
AACTCTTACCAGAAAGAAAGGAATTGATGACATGAAAGTGTGCTTGCAGAAATTTTTG  
CTTGTTCCAGTAGGAAAGGTGATGAACATAAACTATTTGACATGGACATCGTAACCAATG  
AGAATATGGAGTTTCTCAAGGAATTGGCAGGGTCGCACTCGAATGTATAAAGTTTGAAG  
TAGAGGAACGGCCAGAGATGAGGCTAGTTTTAGAGCAGCTTTTGAAGTCTCAAAGATCCC  
GAGATAAGAGCATTATGAGATGCTGGTTGTACGTAAAGAGATTGAGGTATTTTTGAGAG  
GATGTGGTTTTGGAAGATTTATATTGAGTAAAGAGAGTGTGGATGACTTGATATGCAACT  
TGAAATTTGTTCTGAAGGAATGTGCGTCAGGCAAGGCTTACATAGGGAATCTCGCGGCA  
CACCAGTATGGCGATAAAGATGTCAACTGCAGTTACAGAGAAATGGAAAGACATGCTTG  
GGAATGAAATAGCTGTCCAATCTAGAATTAAGCACATGAATGTTGCCAAGCTTATCGGTT  
ACTGCTTAGATCATTGCGATGGTACAGTGCTTATATACGAGTACGGTGCAATTAGCTTGT  
ATGATGTTCTTTTTGGTGATGCGGGGAAGATATATCGTCCCTTCACTTGTGACCTGCGCC  
TGAAGATTGCGATTGGTGCTGCAGAGGGCATTGCTCACCTGCATCCACTTGGCGTCTGTC  
CTGGGGATGTCCGCATTAACGAACACTGTTGGATCATGTCTCTTCGTCCTGGAAAAGA  
TTGCCGGCTTTGGGACATTAGGGCTTCTGACATTGAAAGGGTTTTGGATTTCTTTAA

OsWAKs-Supplemental Data 1[1].txt

>OsWAK70, 2123.t00010, Chromosome 7, post-processing  
 ATGACTTCCTCAGAAAAGCACAAATATAACCACATCTTCTGTGTCAGTATGAGGAGAT  
 TGGTATGATAAACTTTTCACAATCTTTTAGGGATACTGCAAAGGAAGTATTGGCAAAGACA  
 GATATTGATCCAAATGTTAGGTGCTTCCCAAAAAGACAGATGAAGCGCATCACCAACAAC  
 TACAGCACTACCCTGGGAAGAGGAGGGTTTTCTGTGGTGTACAAGGGTAGGCTCGACGAT  
 GGTCGTTTCAGTGGCAGTGAACAATATAATTGGAGAACACAGAAGGAGTTCACAAAAGAG  
 GGTGTAGCGAAACTGTGTGACTTTGGAATATCAAGGCTGCTCTCTATGGATAGTGATGAA  
 TACACAGGATTTGTTATCGGAAGTAAAGGTTATGTGGATCCTGTTTTCTGCCAGACTGGG  
 CGATTAAGCCAAAAATGCGATGTCTACAGCTTTTGGGTGGTTCCTTTAGAACTCTTCACC  
 AGAAAGAAAGGAATTGATGACATGAAAGTGTGTCTTGCGAAATTTTTGCTTGTTCCAGT  
 AGGAAAGGTGATGAACATAAACTATTTGACATGGACATCGTAACCAATGAGAATATGGAG  
 TTTCTTCAAGGAATTGGCAGGGTCGCACTCGAATGTATAAAGTTTTGAAGTAGAGGAACGG  
 CCAGAGATGAGGCTAGTTTTAGAGCAGCTTTTGAGTCTCAAAAGATCCCGAGATAAGAGC  
 ATTCATGAGATGCTGGTTGTACGTAAGAGATTGAGGTATTTTTGAGAGGATGTGGTTTT  
 GGAAGATTTATATTGAGTAAAGAGAGTGTGGATGACTTGATATGCAACTTGAAAATTGTT  
 CTGAAGGAATGTGCGTCAGGCAAGGCTTACATAGGGAAATCTCGCGGCACACCACTGATG  
 GCGATAAAGATGTCAACTGCAGTTACAGAGAAATGGAAAGACATGCTTGGGAATGAAATA  
 GCTGTCCAATCTAGAATTAAGCACATGAATGTTGCCAAGCTTATCGGTTACTGCTTAGAT  
 CATTCCGATGGTACAGTGCTTATATACGAGTACGGTGCAATTAGCTTGTATGATGTTCTT  
 TTTGGTGTATCGGGGAAGATATATCGTCCCTTCACTTGTGACCTGCGCCTGAAGATTGCG  
 ATTGGTGCTGCAGAGGGCATTGCTCACCTGCATCCACTTGGCGTCGTGCCTGGGGATGTC  
 CGCATTAACGAACACTGCTGGTGGATCATGTCTCTTCTGCTCCCTGGAAAAGATTGCCGGCTT  
 GGGACATTAGGGCTTCTGACATTGAAAGGGTTTTGGATTTCTTTAA

>OsWAK71, 2123.t00013, Chromosome 7, pre-processing  
 ATGGGAGATTGGTATGATAAACTTTTCACAATCTTTTAGGGATACTGCGAAGGAAGTATTG  
 GCAAAAGCGGATATTGATCCAAATGTTAGGTGCTTCAAGAAGACAGATGAAACGCATC  
 ACAATAACTACAGCACTACCTTGGGAAGAGGAGGGTTTTCTGTGGTGTACAAGGGTATG  
 CTCGACGATGGCCATTTCAGTGGCAGTGAACAATATAATTGGAGAACACAGAAAAAGGAG  
 TTCACAAAAGAAGTGATCATACAGTCCAGTGATGATAGGAACATTGTTAGATTATTG  
 GGTTGTTGTGTGGAGGCAGATGCTCCAATGCTGGTGAAGTGTGTTGTTCCGAATGGAAAC  
 CTTTCTGAACCTTCTGCATGGGAACATTGGTCAGCTTCTGTCTCATTAGAGACACGCTTC  
 CAGATTGCATTGGATGTAGCAGAAGCAGTTGTATATATGCATTACTCTCAAAATCATCCA  
 ATCCTTCATGGAGACATCAAACCATCAAACATACTTCTAGGCGACAAGTATGTGGCGAAG  
 CTATGTGACTTTGGAATATCTAGGCTTCTCTGCATGGACAATGATGAATACACGGGGTTT  
 GTTATAGGAAGTATGGGATACATGGATCCAGTGATACCGTGAGACTGGACGACTAAGCCCA  
 AAATGTGATGTCTACAGTTTTGGGNNNNNNNNNNNNNNNNNNNNNNNNNNNNNNNNNNNN  
 NNNNNNNNNNNNNNNNTGGCCAGTGGCCAGCCTTTGTGCCGTTATGGCCCCCTTGGTTT  
 TGAAAGACTCGTCACAAAAGATAAGATTCCATCGTAGGCAACCCGAAACAGGTATCA  
 ACCTCAGAGGCATTTTCAGGAAAAAGTAGTGTCTCATTACGCGTGCCATTGGCAAGATT  
 TGCATGGGACATTTGAAAAACATTTCGATTTATCGTGATAAAGATGTCTGTTGAGGCTGAT  
 GAGATTTGGAAGAGATGTTTCTTTATGAGATGATCAAGCAATCTAGAATTGAGCATTGC  
 AATGTCGCCAAGCTTTTTGGCTGCTGCCTAGATCATGTGGATGCCCCAGTATTAGTTTAT  
 AAGTATGGTGACATAGGCTTGCATGATGCTTTTTCGGTAACGCGTGCCAGCAGTTTGAT  
 TGTCTTTTCGCTTGCAGAAATACGCTAGAGATTGCAGTTGGTGTGCTGCAGAAGGCCTTGT  
 CACCTGCACTCACTTAATGTGGTTTACGGCGATGTCAGAACTGCCAATGTAGTACTGGAT  
 GTTTATTCTAAATCTAAGCTCGAAATGCCTGGGATAACTGCATTTATGGCAAAGATTGCA  
 GGTTATGGAACACAAAGGCTCCTTTCTTGGATAAGGCCAAGCATGAAATATTTCTAACA  
 GAGAACATCCATTACAAGGATCCACACTTCTCAAGACTGGGCTCATGGCTAAGGAATAT  
 GATGTATATGGTTTTGGCGTGTTCTTGTGGAGCTTTCGCACAGAACATGGTGCAAATG  
 CATGACGTAAACATGGTGCTCAAAGAAGTTGATGGCATTCTGTAGATGCCATCATCTT  
 AAGGAAATTAAGAACTTGTCTTGGTGTCTTGCATCCAAGGTGACGGAGAGGCCAGCA  
 ATGGACAAGGTAGTACGATGCCTTCGAGCTGTCTTGACAAACCTGCAAAATCTTCATGAT  
 CCCTGCAACTGCAAGTCAATGTATAATAAGTCTGCGATGCAGTCCGAGCAAATTACCAGT  
 GCCAAGTCTGCCAGTAGCTGA

>OsWAK71, 2123.t00013, Chromosome 7, post-processing  
 ATGGGAGATTGGTATGATAAACTTTTCACAATCTTTTAGGGATACTGCGAAGGAAGTATTG  
 GCAAAAGCGGATATTGATCCAAATGTTAGGTGCTTCAAGAAGACAGATGAAACGCATC  
 ACAATAACTACAGCACTACCTTGGGAAGAGGAGGGTTTTCTGTGGTGTACAAGGGTATG  
 CTCGACGATGGCCATTTCAGTGGCAGTGAACAATATAATTGGAGAACACAGAAAAAGGAG  
 TTCACAAAAGAAGTGATCATACAGTCCAGTGATGATAGGAACATTGTTAGATTATTG  
 GGTTGTTGTGTGGAGGCAGATGCTCCAATGCTGGTGAAGTGTGTTGTTCCGAATGGAAAC

OsWAKs-Supplemental Data 1[1].txt

CTTTCTGAACTTCTGCATGGGAACATTGGTCAGCTTCCTGTCTCATTAGAGACACGCTTC  
CAGATTGCGATTGGATGTAGCAGAAGCAGTTGTATATATGCATTACTCTCAAAATCATCCA  
ATCCTTCATGGAGACATCAAACCATCAAACATACTTCTAGGCGACAAGTATGTGGCGAAG  
CTATGTGACTTTGGAATATCTAGGCTTCTCTGCATGGACAATGATGAATACACGGGGTTT  
GTTATAGGAAGTATGGGATACATGGATCCAGTGTACCGCAACCCGAAACAGGTATCAACC  
TCAGAGGCATTTTCAGGAAAAAGTAGTGTCTCATTACGCGTGCCATTGGCAAGATTTGC  
ATGGGACATTTGAAAAACATTCGATTTATCGTGATAAAGATGTCTGTTGAGGCTGATGAG  
ATTTGGAAAGAGATGTTTTCTTTATGAGATGATCAAGCAATCTAGAATTGAGCATTGCAAT  
GTCGCCAAGCTTTTTGGCTGCTGCCTAGATCATGTGGATGCCCGAGTATTAGTTTATAAG  
TATGGTGACATAGGCTTGCATGATGCTCTTTTCGGTAACGCGTGGCAGCAGTTTGATTGT  
CCTTTTCGCTTGCAGAAATACGTCTAGAGATTGCAGTTGGTGTGTCAGAAAGGCTTGTCTAC  
CTGCACTCACTTAATGTGGTTCACGGCGATGTCAGAACTGCCAATGTAGTACTGGATGTT  
TATTCTAAATCTAAGCTCGAAATGCCTGGGATAACTGCATTTATGGCAAAGATTGCAGGT  
TATGGAACACAAAGGCTCCTTTCTTTGGATAAAGCCAAGCATGAAATATTTCTAACAGAG  
AACATCCATTACAAGGATCCACACTTCTCAAGACTGGGCTCATGGCTAAGGAATATGAT  
GTATATGGTTTTGGCGTGGTCTTGTGGAGCTCTTCGCACAGAACATGGTGCAATGCAT  
GACGTAAACATGGTGCTCAAAGAAGCTTGTGGCATTCTGCTAGATGCCATCATCTTAAG  
GAAATTAAGAACTTGCTTCTTGGTGTCTTGCATCCAAGGTGACGGAGAGGCCAGCAATG  
GACAAGGTAGTACGATGCCTTCGAGCTGTCTTGACAAACCTGCAAAATCTTCATGATCCC  
TGCAACTGCAAGTCAATGTATAATAAGTCTGCGATGCAGTCCGAGCAAATTACCAGTGCC  
AAGTCTGCCAGTAGCTGA

>OsWAK72, 2123.t00019, Chromosome 7, pre-processing  
ATGGGAGATTGGTATGAACAATTTTCACAATCTTTTAAGGATGCTGCTAAGGAAATGTTG  
GCAAAAACAGATATTGATCCAAACGTTAAGTGCTTCACAAGAAAGCAGATGAAGCGCATT  
TCAAACAACACAGAACTATCCTTGGGAAAGGGGCTTTTCTGTGGTGTACAAGGGTAGG  
CTCAATGATGGCCGTGCAGTGGCAGTCAAAAAATATAATTGGAACACAGAAAAAGGAG  
TTCACAAAAGAGGTAATCATACAGTCTCAGTTTAGCCATAAGAACATTGTTAGGCTATTG  
GGGTGTTGTGTTGAGGCAGATGCTCCAATGTTGGTCACTGAGTTTGTCCCAATGGTAAC  
CTTTCCAACCTTCTGCACAGCAACAGTAGCCAGTTTCTGTTTCATTAGGGACACGCTTA  
CAGATTGCACTGGATGTAGCAGAAGCACTTGTATATATGCATTCCTCCCAAAATCATCCA  
ATCCTTTCATGGAGATGTCAAGCCTTCAAACATTTCTTGGGTGACAAGGATGTGGCAAAA  
CTCTGTGACTTTTGAATATCAAGGCTGTTATGTATGGATAGTGACGAATACACGGGATT  
GTTATAGGAAGTAGAGGCTATGTAGATCCTGTGTTCTGCCAGACTGGGCGGTTAAGTCTA  
AAAAGCGATGTCTACAGTTTTGGGGTGTCTTTTGAAGTCTATCACCAAAAAGAAAGGA  
ATTGATGACAAGAAAGTGTGCCTTGCAAGAACTTTTGCTCGCATCAGTAGAAAAGGTAAT  
GGACACGAACATTTGACATGGACGTTGTAACAAATGAGAATATGGAGTTTCTTCAAGGA  
ATTGCGAGGCTTGCATTTGAATGTATAAAGTTTGAAGTAGAGGAGCGCCAGAAATGAAA  
GAAGTTTTAGAGCGCTTTGGAGTCTCAAAGATCCCGAGATAGGAGAATCCGTGAGATG  
CAGGTTATGGTACGGAGCGAGATTGAAGTACTTTGGAGAAGATGTGGCTTTGGTAGGTTT  
ATGATCTCGAAAGAGAGAATGGACGATATGACATACTACTTCAAACCTGTTCTCAAGGAA  
TGTGCATCAGGCAAGGCTTACATAGGGAGATTTTGCAACGCACAACCTGCTGGTAATAAAG  
ATGTCGATTTTCACTTTTATGATCAATGGAAAAACATAGTCTGGAACGAATTGAATGTCAA  
TCTAGAAATTAAGCATGGAATGACGCCAAGCTTCTCGGTTACTGCTTAGATCTTTGGGAA  
GGTCTAGTGCTTGTATACGAGTATGGTGCGATGAGCTTGTATGATGTTCTTTTTCATGAT  
GCAAGGAAGGTATCTCCCTTCATTTGTGGCCTGCGCTGAAGATTGCGGTTGGCGCTGCA  
GAGGGCCTTGTCACTTGCATCACTTGGCATTGTGCATGGCAATGTCAGCACTGTCAAT  
ATATTGCTGGATGATCTTTTCGGTACTCAAAGTGATTAGCCGCAATTACCCAGTAAAGATT  
GCAGGCTATGGAACATCAGGGCTCCCTGACATTGACAAGGCACAGCACAGGATTCTTC  
ATGGAGGATTGCTTGTAAACCATGATGGGAAGGAGCATGACGTATACTGTTTCGGTCTT  
GTTCTCCTAACGCTCTTTCACATGGAAGAAGGTGTCACTGCAAGAGGCGGATACCGTGTT  
GAGCAGCTCTGGGACATTGGACCGCCACATGATGTGAATTCGAGCCTGAGAAACCTGGG  
CAACAGCTCAAGGAAGCCATCCTTAGATGCCGTATCTTGAGGAGGTTAAGAGCCTGGTT  
TCACGGTGTCTGACGTCCGAGGTGACGAAGAGACCATCCATGGTGAAGTAGCAAAACAT  
CTCAAGAACATAAATGATTTACATGATAGCACAGCTTGCCATGAGCTGGCGATTTATCAA  
TCTCGAATGCTTTTCGGGCTAG

>OsWAK72 gi|32979818|dbj|AK069794.1| Oryza sativa (japonica cultivar-group) cDNA  
clone: J023030D14, full insert sequence  
GGGTGACGCGCCAGCTCCGTTTCATTCGGTGGAGTCTTCGCCGTTTGGCGATAGACGGCTGGGCCCTCT  
CCGGCTCTCCGCCAACCTCGCTTCTCCCGCGATGCGACCCCGAATCCCGCCGCGCGGGGCTCTTGC  
TCCGCTCCCCCTCGACCGAGGCTTCTTACCTTCCGAGGCGTCTGCATCCCATCAGATCCCGACC  
TCCCGTGCTCCGCTGCGGACGCGCCGAGAGTGTCCAGGAGCAAACCAACCAGAGGCCAGAGCCACTG



# OsWAKs-Supplemental Data 1[1].txt

GCCTGCCAGGGAATGGTAATACGCCGGCTCCGGCCTGAGAAGCGCATCTGTTGATGAAGAAGAAGA  
 ATAGGAAGAATACAAGGCAGGCCTTCCAGGAATTTGAAGATGCAGATATAGTTGACCTTCACACGGACGA  
 CCTTGCAACCGCTTCTACCTACCTGAAATATGATTGATGATAGTAGTTTCTTCTCAGCTGCATTTCTC  
 CACCTCCTCCAATCTGCACTTGTGACGCTGTGACGCCTGAGAATACATCAAGTGAGGCTCCATTTTCGTA  
 ACTGCTCGTCGCTCGTCCGTGACAGGAGCCTATTAACCTACAGGCACAATATACTATATCTTCTGTTTAC  
 TCTTATGGGAGATTGGTATGAACAATTTTACAATCTTTTAAGGATGCTGCTAAGGAAATGTTGGCAAAA  
 ACAGATATTGATCCAAACGTTAAGTGCTTACAAGAAAGCAGATGAAGCGCATTTCAAACAACCTACAGAA  
 CTATCCTTGGGGAAGGGGGCTTTTCTGTGGTGTACAAGGGTAGGCTCAATGATGGCCGTGCAGTGGCAGT  
 CAAAAAATATAATTGGAAAAACACAGAAAAAGGAGTTCACAAAAAGAGGTAATCATACAGTCTCAGTTTAGC  
 CATAAGAACATTGTTAGGCTATTGGGGTGTGTTGTTGAGGCAGATGCTCCAATGTTGGTCACTGAGTTTG  
 TCCCCAATGGTAACCTTTTCAACCTTCTGCACAGCAACAGTAGCCAGTTTCTGTTTCATTAGGGACACG  
 CTTACAGATTGCACTGGATGTAGCAGAAGCACTTGTATATATGCATTCTCCCAAAATCATCCAATCCTT  
 CATGGAGATGTCAAGCCTTCAAACATTCTTCTGGGTGACAAGGATGTGGCAAACTCTGTGACTTTGGAA  
 TATCAAGGCTGTTATGTATGGATAGTGACGAATACACGGGATTTGTTATAGGAAGTAGAGGCTATGTAGA  
 TCCTGTGTTCTGCCAGACTGGCGGTTAAGTCTAAAAAGCGATGTCTACAGTTTTGGGGTGTCTTTT  
 GAACTCATCACCAAAAAGAAAGGAATTGATGACAAGAAAGTGTGCCTTGAGAACTTTTGTCTCGCATCA  
 GTAGAAAAGGTAATGGACACGAACCTATTTGACATGGACGTTGTAACAAATGAGAATATGGAGTTTCTTCA  
 AGGAATTGGCAGGCTTGCATTTGAATGTATAAAGTTTGAAGTAGAGGAGCGGCCAGAAATGAAAGAAGTT  
 TTAGAGCGCCTTTGGAGTCTCAAAAGATCCCGAGATAGGAGAATCCGTGAGATGCAGGTTATGGTACGGA  
 GCGAGATTGAAGTACTTTGGAGAAGATGTGGCTTTGGTAGGTTTATGATCTCGAAAGAGAGAATGGACGA  
 TGTACATACCTACTTTCAAACCTGTTCTCAAGGAATGTGCATCAGGCAAGGCTTACATAGGGAGATTTTGC  
 AACGCACAACCTGCTGGTAATAAAGATGTGATTTTCACTTTTATGATCAATGGAAAAACATAGTCTGGAACG  
 AATTGAATGTCCAATCTAGAATTAAGCACTGGAATGACGCCAAGCTTCTCGGTTACTGCTTAGATCTTTG  
 GGAAGGTCTAGTGCTTGTATACGAGTATGGTGCGATGAGCTTGTATGATGTTCTTTTTTATGATGCAAGG  
 AAGGTATCTCCCTTCATTTGTGGCCTGCGCCTGAAGATTGCGGTTGGCGCTGCAGAGGGCCTTGCTCACT  
 TGCATCACTTGGCATTGTGCATGGCAATGTGACACTGTCAATATATTGCTGGATGATCTTTCCGTACT  
 CAAAGTGATTAGCCGCAATTACCCAGTAAAGATTGCAAGGCTATGGAACATCAGGGCTCCCTGACATTGAC  
 AAGGCACAGCACACAGGATTCTTCATGGAGGATTGCTTGTAAACAGTCATGGGAAGGAGCATGACGTAT  
 ACTGTTTTCGGTCTTGTCTCCTAACGCTCTTTCACATGGAAGAAGGTGTCACTGCAAGAGGCGGATACCGT  
 GTTTGAGCAGCTCTGGGACATTGGACCGCCACATGATGTGAATTCGAGCCTGAGAAACCTGGGCAACAG  
 CTCAAGGAAGCCATCCTTAGATGCCGTCTCTTGGAGGTTAAGAGCCTGGTTTACGGTGTCTGACGT  
 CCGAGGTGACGAAGAGACCATCCATGGTGGAAAGTAGCAAAACATCTCAAGAACATAAATGATTTACATGA  
 TAGCACAGCTTGGCATGAGCTGGCGATTTATCAATCTCGAATGCTTTTCGGGCTAGGCTAGGCTGCAAGTA  
 GCAGTCGTACATGGTTCTTCTTTGAGTAAATTAAGGTGCCGTAGTAGATGCTATAATGCAAGCGCCAAGC  
 AACATATTACATATGTGTATTTTATATCCCGACAAAGAAAAAAGACGTGTGTATTGCATATATTTTGT  
 ACAGCAACGGATGTTTGTATGTTGATTCTCGTGGCGCTGCTGCCATATAATGTTGATTGACAGATCCTT  
 GGGGAACCAACGGATGAAC

>OsWAK73 gi |42407748: c48894-43613 Oryza sativa (japonica cultivar-group)  
 genomic DNA, chromosome 8, BAC clone: OJ1345\_D02

ATGGCCATCCACCCCGCCTGCACTTCAAGACCTATGAAAATACATGATTTTTGCAAGCGGACATTGGCTG  
 ATTTTGATAGGCGGTATCTCCATCTTACAAGCGTTGTAGCCACCTGCCTGCGAAAATGTTCTCGGCGAA  
 CAAAAAATCAACCGCCACCGTCCCATCCTTCGCGCGCCCAACCCCTCCTCCTCCCCAACCCGGCGGAAG  
 ATAGATTTTTCGTAGGACAGCGCATCTTGGCCCTTCCCCTTTCATGCGGAATAGTGGTGTAAAT  
 TTTCTGCTCCTCTGTAGGTATCTCGTCTGAAAAATGTTTTTCCAGGAGTGCCAACCTAGGCCGTTTGTG  
 AATAGTATGTAGATGCAATAGTTTGAATAGATGGTAATATATACAGACATCGGAAGAGATCGATGATGCA  
 GAGGGTAGCAAGCGGCCGAGAAGTTATGACGTGCTGCTGCTGCTGTTCTGCTGTTTAGCAGCCTCGCTACTG  
 ATGCTGTTGCTACCGTTCTTGGCATGGCAGCAGCAGCTGCAGGCGGGAGCAGCAGCAGCAGCAGCTGCA  
 GGCGGGATCAGCATCGAGTACCGGTTCTGCGTGGAGCCTGGCTGCTACCACCCAGGCTTCAACCTCACCT  
 GCAACCACTCTACAGCCCGCCAGGCTATTCTCGGCGACGGCACGGTGCAGGTGCTCGAGATCGCAT  
 CCCCCAAGCCACCGTGGCATCAACAGCGGCCGATGGTGTCAATTCTACTGGCAATCATGCCGTCAAC  
 AGATCATTATTGGATCAGGTGGGAAGGCCGTAATCTGTTGGCAGCTTCAAACAGGATAGCTTTGCTAAGCT  
 GCAACGCCCGGGTTGACGTCCGCGCGGCTGGGAGAAACAACAACAAACTAGTACTAAGTTGCTCAGTTC  
 CTGCACTGCCATCTGCCAACAGACGATGGAGGTGGTGTACCACTATCCTCGATATTGGTCCAGAGGGT  
 CCATGCTCAGGATTTGGCTGCTGTGAAACAAGCATGCTACTAGCAGGAAGCTCGACTGCTGCCTACAGCA  
 TCCAGGTCAGAACTTGACGAGCAGGCGCTGCTGTAATCGAACGATGATCTGGTGTACTTGGTAGA  
 TGAGAGATTTAACTATACCTTGGACATGTCTTTCGGCTACAGCAGTCTGAAGAGCTCCAGCAGCGCTA  
 GACTGGTACATAAATAGTTTATCAGCGTGTCCGTTGCCGCGTCCGCCCCGAATGTGCGAGCGCGCACA  
 GCTATTGCGACAGTACTTACGACAACAAGGCGTACATCTGCCGCTGCTCCGAAGGTTACGAAGGAAATCC  
 CTACGTTCTGATGGATGCCATGGTAATTAATATAAGCCCTTGCTGCTTTAATTTCTTCATGTTCT  
 TCAACAATCAACTTCTAATTAAGTACTCTATCTGTTTCAAATGAAGAAAAAACAACCTCCTA  
 ACTGATATATACGCCCTTGTGTTGCTAGATACGATGAATGCAGTTCTGGATACTGCAGTTACGGCGA  
 GTGAGGAACACACAGGATCGTTTCAATTTGCAACTGCCCTCGTGGCTACGAGGGCAATCCATCGCCAAAA

OsWAKs-Supplemental Data 1[1].txt

GATGGATGCAAAGGTGAACTAAACTAGCTAGCTAGTTGGATTGCCACAAATCTGTACAAGGATAGATT  
TATTTCAAAGTTTTGCCTCTACTTTCTTTTGATCAAACCTACAATGAGACATTTGGTTATTTAGTTTCT  
CTCAATTTCTTGCCATTGCGACACGAATCTATTGAATATTTGTTTCTATATCTTTATAAATGGAGTATAC  
TCCCTCCATACTTATAAAGGAAGTCGTTTAGGACAATGTTTAAGTTAAATCTTGGAATATAAATCATGA  
ATAACTCTCAAGTTGTTTAGTTTGAAAATATAAAAATTATATGAATAGATTTGTTTGAAAAATACTTTC  
ATAAAAGTATACATATATCACTTTTCAATAAATATTTTATAGAAAATAGAAGTCAAAGTTGTGTTTTGG  
AGACCGTGTGCTGTCCAAAACGACTTCCTTTACAAGTACGGAAGAAGTATCTAATAGCCAGTATCACAT  
TACACACACAACCAAGTGCTATTAATATTAAGGGTAATTTTACAATCCTTGAGAAAGTACCAAAAGGTAT  
CGTATTTTTTATATAAAAATTTGGTACTTCAACATATGGAGTACCAAAATTTTTTAAATAAATTTAGGTACC  
TCAAGATATATTAACATAAAAATTTCTCTATATTAATATCACTAGAGATGCTAAATCATTACTCTGGTTG  
TGTAACCTCTATTTCTCCATCCTCTCCTCGTAACACTAGCTCTATATTGAAATAATCAAAAAATAAAT  
CTATCCGCTATTTATCAATGCTTCTTTCTGACAACTTTTTGTACCTAAAGTTTTCACTTTTCAATACTA  
TAGACAATTGCCTTCATCTTTGTAGTCATTTACTTTGGTGGATAGTATGATATGTTATCATTTTTTCTCC  
ATTTGACCGCCACATAATCATTTCCATTATAATATATTGATTCTAATTTAGAATTTGTATCAAACATAAAT  
TAAATATTTATATTTCTATTACAAAAGTCCAATTGTTTGTGTTTGTGTTGACTTTTTTATTTTTTACTT  
TTTGTATATTCCAAATCATAACACCTAAAGATTCTACTTTGAAATTTGCATGCAATCCAATTACTATTT  
TTAATAAAAAATATCATTTACTCTCATGGATTGTATTTGGCATGGACTCTTATGTTAATATGTTTGGTCTT  
ACTTTTATTTCTATTCCAAAATTTAGTTATATAGGGATTTTACTATATAATTTGTAATGAAATGAAATAT  
AGTTGATTTTTTTATTTGTTTTATTACGAATAATATTATTTTCATGTCAATTTACAGTATTGATTTTT  
AAATATTTTTAGTCTATAAATTTCTACTAGTATTTATAAAATGTATTTTTTAAATGGTCTCTTCTTAAT  
ATGTATTTGCCAAGGACACTTCTTTACATATTTTATTAATTAATATTTTTGTTTCATTGGGAGTTTACCT  
GTCCTTTAATTTCACTTAGATATTCTTATTGAATTAATGATGATTTTATTTTATTCTTTTACTCTAAAA  
GTGGTATTGTGTTCCACATACGTTCTTATTTTAATATTCTATATTCTATATTGTAATTTCAAATTTTCAG  
AATTTTTATAGTGTATCTCTATGCGAATTCGTTGGTTAGTGTAGACTATTATAATCTGTACCCATACTA  
CAATCAACGGTGTATGATCTTCTTTCTATGATTAGCGTAGTAATTTCTAAACCTCCAAAGCATTACTA  
TGAAATGGCTCATTTTTCTTCTATCTGAACAATATAATCTAAGCAGACACTACTATCAACGCCATATATA  
GAGTATAGACCTTTGCTTTTCGTCATATTTTGTACTCCCTCCGTTTCAAATGTTTGACACCGTTGACT  
TTTTAGTACGTGTTTGACCATTGCTCTTATTTCAAAAAAATTAAGTAATTATTTATTTCTTTTATATCAT  
TTGATTCATTGTTAAATATACTTTTATGTACACATATAGTTTTACATATTTTCAAAATTTTTCTGAATAA  
GACAAATGGTCAAACATGTGCTAAAAAGTCAACGGTGTCAAACATTTTGAACCGGAGGGAATAGGATTTA  
TTTTCCATGATCAAATGCATGTCTGATCACATTATTCGCTGTTGTACTCATCTAGACATCGATGAATG  
TGCGCGCATGATATTTACCGTGTTATGGGAAGTGCATTAATTTGCCTGGAGATTATATTTGCTTATGC  
AACAATGGAACCTACGGGGATGCGAAGAAAAGGAGGGATGCATTCCGATGAAGCAAGGTGATAAAT  
AATGTAGCATATATTTTCCATTTGTTTGTAACTTAATTAGTATATATAAGGTTACGTTTTTGTAAAGGT  
AGCTATAGCACTAAAAACACTGTGTGTTGATGACCCTTGCTGACAGTTTCTTTCTCAATTGAATTTATCT  
TCGTCTAGCACGAGATTTAGGTCTACGCATCGGGCTTGGGGTGGTGGTGGCACAATTTCTTTGCTCCTC  
GCACTAAGTGCTCCCTTTATATCAAGCAAAATGAAGCTGCGCAAGATGAAAAGAATGAAAGAGACTTTTT  
TCAGGCAAAACATGGCTTGCTATTAGGACGATTGGTATCACAAAACGCAGATATTGGTCAAAGGATGAT  
CATGACTTTACAAGAGCTAGAGAAGGCCACAGACAATTTGATAAATCTCGTGAAATTTGGTGGTGGAGGA  
CATGGCGTGTGTATAAGGGAATTTAGACCTGCAAGTTGTTGCCATTAAGAAATCAAGGATTGTCGTAA  
AAAGAGAAATCGATGACTTTATAAATGAAGTTGCAATTTCTTCTCAAGTCAATCATAGAAACGTGGTGAA  
GCTTCTAGGATGTTGTCTTGAGACAGAAGTTCCATTGTTGGTTTATGAGTTCATTTCAAATGGATCTCTA  
GATCACCATCTTCATGTTGATGGACCAATTTGCTACCATGGGATGATCGAATAAGGATTGCTCTTGAAG  
TTGTAGAGCCTTGACTTATCTACATTCAGCTACTACAATACCAATATTCCATAGGGATATTAAGGCATG  
CAACATACTTCTCGATGAAAAATTAATATCAAAGGTATCAGACTTTGGAGCTTCAAGGTATATTCCGATT  
GAACAACTGAAGTGACTACAGCAGTTGAGGAACAATTTGGCCATTTAGATCCCATGTACTACTATACAG  
GTCATCTAACAGATAAAAGTGATGTTTTAGTTTTGGTGTCTTCTTATAGAATTGCTCACTCGAAAAAG  
GCCCATGTATAGGACTGATCACGGTGAAAGTCTTGTGTTATATTTGCCTCGCTTCATAGACAAGGTCAG  
GTGGTTGAAATAATAGATCCACAAGTCATGACGGAGGGAGATGGAGACCAAAATCCAAGAAGTAGCATCAC  
TAGCTGCAACATGCATAAATTTGAATGGACAAGACCGGCTACTATGAGAGATGTGGAATGACACTTGA  
AACTTGGCAGTCAAGAAGAAGCTTGCTTACATAGTGTAATTAATCAAGTAGATGTAATGCATCTGAAATT  
ACAAAGCATTACATGTTAGTTACAGGCCAGGGAAGCAAGGAAATGAGCAGACAATACAGCATGGAAGAGG  
AGATGTTGTTGTCTGAAAGGTATCCTCGTTGA

>OsWAK73 mRNA

ATGGCCATCCACCCGCTGCACTTCAAGACCTATGAAAATACATGATTTTTGCAAGCGGACATTGGCTG  
ATTTTGATAGGCGGCAGACGGCCATCTTGCCCCCTTCCCATCTTGATGCGGAATAGTGGTGCAGCAGCT  
GCAGGCGGGAGCAGCAGCAGCAGCTGCAGGCGGGATCAGCATCGAGTACCCGTTCTGCGTGGAGCCT  
GGCTGCTACCACCCAGGCTTCAACCTCACCTGCAACCACTCCTACAGCCCGCCAGGCTATTCTCGGCG  
ACGGCACGGTGCAGGTGCTCGAGATCGCCATCCCCAAGCCACCGTGCGCATCAACAGCGGCGCATGGT  
GTTCAATTTCTACTGGCAATCATGCCGTCAACAGATCATTATTGGATCAGGTGGGAAGGCCGTACTTCGTG  
GCAGCTTCAAACAGGATAGCTTTGCTAAGCTGCAACGCCCGGTTGACGTCCGCGCGGCTGGGAGAAACA  
ACAACAAACTAGTACTAAGTTGCTCAGTTCTGCACTGCCATCTGCCAACAGACGATGGAGGTGGTGC

OsWAKs-Supplemental Data 1[1].txt

TACCACTATCCTCGATATTGGTCCAGAGGGTCCATGCTCAGGGATTGGCTGCTGTGAAACAAGCATGCTA  
CTAGCAGGAAGCTCGACTGCTGCCTACAGCATCCAGGTCCAGAACTTGCAGGAGCAGGCCGTCTGCTAA  
ATCGAACGGATGATCTGGTGTACTTGGTAGATGAGAGATTTAACTATACCTTGGACATGTCTTTCGGCTA  
CAGCAGTCTGAAGAGCTCCCAGCACGGCTAGACTGGTACATAAATAGTTCATCAGCGTGTCCGTTGCC  
GCGTCCGCCCCGAATGTCGACGCGCACAGCTATTGCGACAGTACTTACGACAACAAGGCGTACATCT  
GCCGCTGCTCCGAAGGTTACGAAGGAAATCCCTACGTTCTGATGGATGCCATGATACGGATGAATGCAG  
TTCTGGATACTGCAGTTACGGCGAGTGCAGGAACACACCAGGATCGTTTCATTTGCAACTGCCCTCGTGGC  
TACGAGGGCAATCCATCGCCAAAAGATGGATGCAAAGACATCGATGAATGTGCGCGCCATGATATTTACC  
CGTGTATATGGGAAGTGCATTAATTTGCCTGGAGATTATATTTGCTTATGCAACAATGGAACCTACGGGGA  
TGCGAAGAAAAAGGAGGGATGCATTCCGATGAAGCAAGCACGAGATTTAGGTCTACGCATCGGGCTTGGG  
GTTGGTGGTGGCACAATTTCTTTCCTCGCACTAAGTGCTCCCTTTATATCAAGCAAAATGAAGCTGC  
GCAAGATGAAAAGAATGAAAGAGACTTTTTTCAGGCAAAACCATGGCTTGCTATTAGGACGATTGGTATC  
ACAAAACGCAGATATTGGTCAAAGGATGATCATGACTTTACAAGAGCTAGAGAAGGCCACAGACAATTTT  
GATAAATCTCGTGAATTTGGTGGTGGAGGACATGGCGTGTGTATAAGGGAATTTTAGACCTGCAAGTTG  
TTGCCATTAAGAAATCAAGGATTGTCGTA AAAAGAGAAATCGATGACTTTATAAATGAAGTTGCAATTC  
TTCTCAAGTCAATCATAGAAACGTGGTGAAGCTTCTAGGATGTTGTCTTGAGACAGAAGTTCATTGTTG  
GTTTATGAGTTCATTTCAAATGGATCTCTAGATCACCATCTTCATGTTGATGGACCAATTTTCGCTACCAT  
GGGATGATCGAATAAGGATTGCTCTTGAAGTTGCTAGAGCCTTGACTTATCTACATTCAGCTACTACAAT  
ACCAATATTCCATAGGGATATTAAGGCATGCAACATACTTCTCGATGAAAATTTAATATCAAAGGTATCA  
GACTTTGGAGCTTCAAGGTATATTCGATTGAACAACTGAAGTGAAGTACTACAGCAGTTTCAGGGAACAATTG  
GCCATTTAGATCCCAGTACTACTATACAGGTCATCTAACAGATAAAAGTGATGTTTTTAGTTTTGGTGT  
TCTTCTTATAGAATTGCTCACTCGAAAAAGGCCCATGTATAGGACTGATCACGGTGAAAGTCTTGTGTTA  
TATTTTGCCTCGCTTCATAGACAAGGTCAGGTGGTTGAAATAATAGATCCACAAGTCATGACGGAGGGAG  
ATGGAGACCAAATCCAAGAAGTAGCATCACTAGCTGCAACATGCACTAAATTGAATGGACAAGACCGGCC  
TACTATGAGAGATGTGGAATGACACTTGAACACTTGCAGTCAAGAAGAAGCTTGCTTCACATAGTGTA  
AAATCAAGTAGATGTAATGCATCTGAAATTACAAAGCATTACATGTTAGTTACAGGCCAGGGAAGCAAGG  
AAATGAGCAGACAATACAGCATGGAAGAGGAGATGTTGTTGTCTGAAAGGTATCCTCGTTGA

>OsWAK74 9636. t03854, Chromosome 8, pre-processing  
ATGAGAGTTGTGTTTTCGCTATCTGTACTTGCAGTTCTGCTGCTACAGCTGCTGTTGGGT  
GTAGCAACGGCGGCAGCAGCTAATTGCAGCACCCACTGTGGCAACATCGGAATCTCCTAT  
CCATTTGGAGTAGAGCTGGCTGCTACCACGAGGGCTTCAACCTCACCTGCGATCGCTCG  
CACAAGCCGCCAAGCTGTTCTTGGTGATGGCTCCGTTGAAGTGTGAGATCTCGATT  
CCTAGTGGCAGGTCGCGATCAACAGCAGCAGTATCGTTCAGTATCAACATCAAGTGCT  
GTTGGAAGTGGCAGTGTCAACAAGACAGGGAAATACCACACATGGGGTGGACTGAGAAAG  
GGCGGCCCGTTCTTCATCTCGCCGTACAAGAACAAGTTCTGGTTCATCATGCAGCAAT  
GTTCAAGTTCCTTCTTGGAGGCGATAATCCACTGTCAATGCCTGTGCTACTTACTGC  
CCTCCAGCCCCAAGAAAGGCCAACCTTTTCAGTTCCCAATGCGCAACGAGTGTTCTGGT  
ATTGGCTGCTGCAGTGGCCATCCCCAAGGCTACACATCCTATAGCATCCAGATCCAA  
CCTGCCAATGAAATTTAGAGTTTGATGCAGAGTCTCTGTGTACATAGCTGAGGAGGGG  
TCCTATAATGCCACACGCTTATCTTTGAACTGTGAGTGCCTCCAGCTTTGCTGGAC  
TGGGCTATTAGCAATTCGACATGTGGTACGAAGCCATCTGCAGCCCTGCACCTGCATGC  
CGCAGCAGTAACAGCTATTGTCAAACCTATACAAGCTATGTCTACAATGGCTATCAGTGT  
CGCTGCAATGCTGGTTATCAAGGCAACCCTTACATTTCAAACGGATGCCAAGGTAAACAA  
GTCAATTCACCTGCTTTTTATTTCTTTAAGTCAACAAGTTAAAATGGAAATCAGTTG  
AAAACAGCTCGGTGCTTCGATAAGTATACATCTATGTGGCTATTTTCCCAGTCTAATTAC  
ATGCTTCTTCATTATTTGGTTAGACATTGACGAATGTTACACTGGAACTCCACTCATG  
CTATGGTACCTGCGTAAATATGCCCGGAACATTTTCATTGCCGCTGTCCTGATGGGACTTA  
CGGCAATCCCTTGATGGAAGGGGGATGCATCAAGATAAAGAATTCCTCTCAAGGTGACAA  
TCACTCCCTAATTACCTTGTACTCATGCCATCAACTCTATATGTAGATTTTTTTTAGTAA  
TGAGACTGGTGGTAATGGCATCTACATAGCTGGCAGTTGGTATCCAGTAATTGATATTTT  
TTTGAAAGGAATGTTAGTAGTTTTTATTAATTTCTCTGCCAATTAACATGTCTGTTGCT  
CTGTTCTATCTTCATTACCTGAGTGCAATAATTGCGCATTCCAGTTGTTTTTCGTTTGT  
TTCTCTGAAGAACTGTTTTATTCAATTTACATGAGCTCTTCAATTATTTGTTTCACATTC  
TGCTCTTACAGTGCAGCACACTACTATTTTTTAAATAAAAAATAATAGCCTTTGTA  
TTTAGAGAGATGTTCTGCACCTTTTTCAGTAACCATTTGTTTATGATCACCCTAAAA  
TGTGGGAAGCTACATGATTATGTGAGCTTGAGTGGTTACTTTTAAAGGAAAAACATAGTT  
GTTCACTTTGAACAAATAATACGGCACTGTGGTGATATGTTGAATAAACTAAAAGTAGAC  
TATGTGATTTGTTATGTAATTTTGTGTGTAGTTCTGTACCTAAAAAATCATGATGTGT  
TGCATCAACAGATCAACTAAAGTAGACTGTGATTACCGTATGCGCATTGCAACTAATTT  
TGTTGTGTGAGTTTGTACCCGAAAAAGCATGATATTAATTTTACAAGGTTTCTACCAC  
TATTTATTATGTTCTTCTTACTATCTTCATAGGATCTTTACTGGAATTATCTTATAGA  
ATCGTGTCTTATAACTCGTATGATCCTATGGTACAGACTATAACATTGACAACCTCAAT

OsWAKs-Supplemental Data 1[1].txt

GCACGGTCTATCCTCTAGATAACTCTCTTGCATCATTGCATGATATCTCATACTGATTTT  
TTCTCCGTAATTTTTCAGGTTTAAAGCATTGGTCTTGTAGTCAGTGGCGGCACAGTTCTTT  
TGCTTCTGGCTCTTTGTGCTCCCTCGCAACACGTAAGATTAAGCTACGGAAGATGAAGA  
AAACAAAAGAAAGATTTTTCAAGCAAAATCATGGGTTGCTATTGCAGCAATTAATTTAC  
AAAAGGTGGACATTGGGGAAGAATGATCATTACCTTATCAGATCTAGAGAAGGCCACAA  
ACAATTTTGATAAAAGTCGTGAGGTTGGTGGGGGAGGGCATGGCATTGTGTACAAGGGAA  
TACTTGACCTACATGTTGTGGCCATCAAGAAATCAAAGATAGTAGTACAACGAGAAATTG  
ACCAATTCATAAATGAGGTTGCAGTTCTTTCCCAAATCAACCATAGAAATGTAGTGAAGC  
TCCTAGGATGCTGCCCTTGAGACAGAAGTTCATTGTTGGTTTATGAGTTTGTTCAAATG  
GAACACTTTATGATCATCTTCATGTTGAAGGGCCAATGTCAGTTCCGTGGGATGACCGAC  
TAAGGATTGCATTGAAGTTGCTAGAGCTGTTGCGTATCTGCATTAGCTAGTTCTATGC  
CAATATTCATAGAGATATTAAATCTTCCAATATACTTCTTGATGATAGCTTGACAGCAA  
AGGTGTCAGACTTTGGAGCTTCAAGGTACATTCCAATCGATCAAACAGGAGTGACAACAG  
CTGTTTCAGGGAACATTTGGATATTTAGATCCAATGTACTATTACACTGGAAGGCTAACTG  
ACAGGAGTGATGTTTTTGTGTTTGGTCTTCTCTCGTGAATTGCTTACTAGAAAGAAGC  
CGTTTGTACACACCTCTAGCAACGGCGATGCTCTTGTGTTTACATTTTGTTCCTACATA  
CAGAAAACAACCTTGGTCGACATATTAGATCCTCAAGTCATGGAAGAGGGAGATGGAGAAG  
TCCAAGAAGTAGCTGCACTAGCAGCAACGTGTATTAAATTGAAGGGAGATGACCGGCCTA  
CAATGAGAGAAGTGGAGATGGCACTTGAAGATATACGAGTTAAGAAGAAGCATGCTACAC  
TTGGTACAACATCAAATAGATGTGATGGGGACCAAAATTGTATGTGATTATTTGTCGACTA  
GAGGAATCACTGACGAATCAACAAGACAATACACTATGGAAGAGGAAATATTGTCGTCTG  
GTACCTATCCTCGATGATGTTTGTCTTTGGCCTGAACTAGAATTGCTGTTTGTATATGT  
ACAACGTTTGTAAAGCATGTCAGTAGTGAAGAAGTGATCTTGCTTTATTGTTTTGGAAA  
TGAAGAATTGTTTCTATCCCGTCATAAACAATTCCCGAAATCTTTTCGTTGGCAGCGAAT  
GTCTGGCTCAGTTGAATTCATACCTTAGATAAATCAATGCATGTAAACATAACAATGG  
AAGGCAATTATATATTTTTCTCT

>OsWAK74 9636. t03854, Chromosome 8, post-processing  
ATGAGAGTTGTGTTTTCGCTATCTGTACTTGCAGTTCTGCTGCTACAGCTGCTGTTGGT  
GTAGCAACGGCGGCAGCAGCTAATTGCAGCACCCACTGTGGCAACATCGGAATCTCCTAT  
CCATTTGGAGTAGAGCCTGGCTGCTACCACGAGGGCTTCAACCTCACCTGCGATCGCTCG  
CACAAGCCGCCAAGCTGTTCTTTGGTGATGGCTCCGTTGAAGTGCTCGAGATCTCGATT  
CCTAGTGGCAGGTCGCGATCAACAGCAGCAGTATCGTTCCAGTATCAACATCAAGTGCT  
GTTGGAAGTGGCAGTGTCACAAGACAGGGAAATACCACACATGGGGTGGACTGAGAAAG  
GGCGGCCCCGTTCTTCATCTCGCCGTACAAGAACAAGTTCTGGTTCTATCATGCAGCAAT  
GTTCAAGTTCTTCTTCTTGGAGGCGATAATTCCACTGTCAATGCCTGTGCTACTTACTGC  
CCTCCAGCCCCCAAGAAAGGCCAACCTTTTCAAGTTCCCAATGCGCAACGAGTGTTCTGGT  
ATTGGCTGCTGAGTGGCCATCCCCAAAGGCTACACATCCTATAGCATCCAGATCCAA  
CCTGCCAATGAAATTTAGAGTTTGATGCAGAGTCTCTGTGTACATAGCTGAGGAGGGG  
TCCTATAATGCCACACGCTTATCTTTGAACTGTCAGTGCCTCCAGCTTTGCTGGAC  
TGGGCTATTAGCAATTCGACATGTGGTACGAAGCCATCTGCAGCCCCTGCACCTGCATGC  
CGCAGCAGTAACAGCTATTGTCAAACTATACAAGCTATGTCTACAATGGCTATCAGTGT  
CGCTGCAATGCTGGTTATCAAGGCAACCCTTACATTCCAAACGGATGCCAAGGTTTAAGC  
ATTGGTCTTTGATGTCAGTGGCGCACAGTTCTTTTGGTCTGCTGCTTTTGTGCTCCCTC  
GCAACACGTAAGATTAAGCTACGGAAGATGAAGAAAACAAAAGAAAGATTTTCAAGCAA  
AATCATGGGTTGCTATTGCAGCAATTAATTTCAAAAAGGTGGACATTGGGGAAGAATG  
ATCATTACCTTATCAGATCTAGAGAAGGCCACAAACAATTTTGATAAAAGTCGTGAGGTT  
GGTGGGGGAGGGCATGGCATTGTGTACAAGGGAATACTTGACCTACATGTTGTGGCCATC  
AAGAAATCAAAGATAGTAGTACAACGAGAAATTGACCAATTCATAAATGAGGTTGCAGTT  
CTTTCCCAAATCAACCATAGAAATGTAGTGAAGCTCCTAGGATGCTGCCTTGAGACAGAA  
GTTCCATTGTTGGTTTATGAGTTTGTTCAAATGGAACACTTTATGATCATCTTCATGTT  
GAAGGGCCAATGTCAGTTCCGTGGGATGACCGACTAAGGATTGCATTGAAGTTGCTAGA  
GCTGTTGCGTATCTGCATTAGCTAGTTCTATGCCAATATTCCATAGAGATATTAAATCT  
TCCAATATACTTCTTGATGATAGCTTGACAGCAAAGGTGTCAGACTTTGGAGCTTCAAGG  
TACATTCCAATCGATCAAACAGGAGTGACAACAGCTGTTTCAGGGAACATTTGGATATTTA  
GATCCAATGTACTATTACCTGGAAGGCTAACTGACAGGAGTGATGTTTTTGTGTTTTGGT  
GTTCTTCTCGTGAATTGCTTACTAGAAAGAAGCCGTTTGTACACACCTCTAGCAACGGC  
GATGCTCTTGTGTTTACATTTTGTTCCTACATACAGAAAACAACCTTGGTCGACATATTA  
GATCCTCAAGTCATGGAAGAGGGAGATGGAGAAGTCCAAGAAGTAGCTGCACTAGCAGCA  
ACGTGTATTAATGAAGGGAGATGACCGGCCTACAATGAGAGAAGTGGAGATGGCACTT  
GAAAATATACGAGTTAAGAAGAAGCATGCTACACTTGGTACAACATCAAATAGATGTGAT  
GGGACCAAATTTGATGTGATTATTTGTCGACTAGAGGAATCACTGACGAATCAACAAGA  
CAATACACTATGGAAGAGGAAATATTGTCGTCTGGTACCTATCCTCGATGATGTTTGTCT

OsWAKs-Supplemental Data 1[1].txt

TTGGCCTGAACTAGAAATTGCTGTTTTGTTATATGTACAACGTTTGTAAAGCATGTCAGTAG  
TGCAAGAAGTGATCTTGCTTTATTTGTTTGGAAATGAAGAATTGTTTCTATCCCGTCATA  
AACAATTCCCGAAATCTTTTCGTTGGCAGCGAATGTCTGGCTCAGTTGAATTCATACATT  
CTAGATAAATCAATGCATGTAAACATAACAATGGAAGCAATTATATATTTTTCTCT

>OsWAK75 9636.t03855, Chromosome 8, pre-processing  
ATGCATGTTTTTGCCATAGCCACACTGCACTTGCTGCAGTTTCTAGCAGCAATACCCCTG  
ATACTTTTCATATAACATAGCATTGCCTGGTTGCACTGACACATGCGGAAACACAACCATA  
CCTTACCCATTTCGGTATTGGCGACGAACGGTGCTTCCGCGAGGGCTTCAAACCTAGTGTGC  
GACCCAGCTTATGATCCCCCAAGCTCTTCATGAACGGCCCTGGATATGAAGTTCACAAG  
ATAAAGCTGGCACGTAGAGTTCTGCACCTTGATACCGGCATCACCCAAATGTTGGGGGGA  
GACAGCTACAACCAGAAATGGATCCTCGACTTGATGACAACTCTTCCGGGTATCGGCA  
GACATGAATGTTTTCATCACCTGGGTTGTGGTTTCCACTTCTTCATAGGTAGTTCTCCT  
GCAGCAGCAGGAGACAATGCTACTAGCAGCAGCAACTGCGTTTCGAATTGCCGCCAGGT  
TACCCCATACTGGCAACGGATGGCACATGCTATGGCATTGGCTGCTGCAACGCATCGGTG  
GTTGAAGACCACAACCTCTACACGATCAAGCTTCTCTCCCTGCAGTCTAGTCCAAGGGCG  
GTGCCGTTCAACGCGAGCATGGTGGTGGTGAAGGGGGAGTGGTGGAGGAGGGCAGACAAT  
GCCATGCTGCTGCAGCAAGAGGTCTGTCAAGGCTGGGTGCCATCGCTGGGGCGCCGGAT  
GCTGCAAGGAATGTGGGTGTCCGGACTGTGGTTAACTGGATGCTGGGTAACCTCATCGTGC  
GTGGAAGCTAAGAAGTTGAGTGATTTTTGGGTGTCTCAGTGACAACAGTGAGTGTGTTGAT  
GGCCCTGCAGGGAGAGGCTATGCGTGCAAGTGCCGCTCAGGATATGATGGTAACCTTAC  
ATGCCAAATGGATGCCAAGGTATGATACTCTCTGCAGATATGTCAGTATGTGCACTCATG  
GTTTTGATGTCACTTAAAGAGTTATAAAAAAATTTGAGAGCGTAGATTATTGTCTCATAT  
CACTCCACAAGCGTGCAAGACTACAAGTTTTCTACAAGTTGTAACAACAGAAGCTGGCTAT  
AAATAGTGCCTCTACTTTTTCATAGGTTTAAATTTGTTCTTTTTGTTTCTCTATACGTGTAT  
CAGTTTTGGAGTTAAGAAATTTTCAGAACTATTCGATCGACACTTGAGAGGTTATAACTT  
AGAAGCATGCAAGGGCACATACCCAGATTAACACAGTAAATGCAGCTCAGATACATTTAA  
CCTTATTGCGTGATCACTTTGCACAATTTAATTTTTATTTCTTTTTTACAGATATTAAT  
GAATGCATGCTGCCAAATCCACCCCTATGCTTTGGGAAATGCATAAATACAGTAGGATCA  
TATGAGTGTATCTGTCCAGGTGGCACATCTGGTAACGCCCATATACAAAATGGATGTGTT  
TCAAGCAAACTTAAATTTTCAGGTAACAGAAAGAAAGTTCAGTCAATGTCTGAGGGTACT  
GTTCTACTATGTTTTCTTTGTTGAGATCAATTTAACGGAGTAAACGATTTAAATTTTACA  
TTTTCTTACAAATCCAGGACTCATATTGGAATAGGACTTGGTGGCAGTCTAATCATCGT  
GGTACTAATTTCTACTGGAATTGTCTGAAGGCGAAAGTTCAGTCTCGAAGGGCCAAAAA  
ACTGAAGGAATTTCTTCTCAAGCAAAACCGAGGATTGTTGCTTCATCAACTTGTAGACAA  
GGATATCGCTGAAAGGATGATCTTCAGCTTAGAAGAGCTTGAGAAGGCGACAAACAATTT  
TGACGAGTCTCGAAAGCTTGGTGGTGGTGGCCATGGAACCGTCTATAAAGGGATTTTGTCT  
TGACCAAGCTGTTGTTGCTATCAAGAAGTCAAGATATGCTATTAAGAGAGAAATTGATGG  
ATTTATTAACGAGGTTGCCATCTTTCCCAAGTAAATCACAGGAATGTAGTGAAGCTTTT  
TGGATGTTGTCTTGAGACAGAAGTTCCATTGTTAGTCTATGAGTTCATTCCAAATGGAAC  
ACTTCATGAATATCTTCATGTCAACTCTGCACAATCAGTCCCATGGAAGGAACGGCTGAG  
GATAGCACTTGAATAGCTAGGTCTCTTGCTTATCTACATTCAGCTGCTTCGGTATCAAT  
CATCCACAGAGATATCAAGACCACCAACATTCTACTTGATGATAGGTTTCATAGCAAAAGT  
ATCCGACTTCGGAGCTTCTCGAGGTATCCCAATTGATCAAAATATTGTAACCTACTACTAT  
CCAGGGAACTTTTGGATACCTTAGATCCAGAGTACTACCGTAAAAGCCGACTTACGGAGAA  
AAGTGATGTATACAGCTTTGGTGTCTACTTGCAGGCTAATAACACGAAGAAGGCCAAC  
TTCCTACATATCACCAGAAGGCTTCAATCTAACCGAACAATTTATCTTGCTAGTTAGTGA  
GGACAGGCTCTTGAAATAGTAGACAGTCAAATCACTAAGGAGCAGGGAGAAGAAGAAGC  
CAGAGAAGTGGCAGAAATGCTGTTATGTGCTTAACTTAAAGGGTGAAGACAGGCCGAC  
AATGCGGCAGGTTGAGGTGAAACTTTGAAGGGTTGCAGGGTGTGTAACACTATCAGAGG  
TCGACGTGCAGTTCAGTTGAATTTCTCCATTGACTGAAGAGAGCGATTCCAACATCGTTGC  
TGTTGGTGACGCTGGTTATCACAACTCAAGCAGGCGGCTCAGTATGGAGGAGGAATTCTG  
GTCATCTATGAGCTTTCTCGTTGA

>OsWAK75 9636.t03855, Chromosome 8, post-processing  
ATGCATGTTTTTGCCATAGCCACACTGCACTTGCTGCAGTTTCTAGCAGCAATACCCCTG  
ATACTTTTCATATAACATAGCATTGCCTGGTTGCACTGACACATGCGGAAACACAACCATA  
CCTTACCCATTTCGGTATTGGCGACGAACGGTGCTTCCGCGAGGGCTTCAAACCTAGTGTGC  
GACCCAGCTTATGATCCCCCAAGCTCTTCATGAACGGCCCTGGATATGAAGTTCACAAG  
ATAAAGCTGGCACGTAGAGTTCTGCACCTTGATACCGGCATCACCCAAATGTTGGGGGGA  
GACAGCTACAACCAGAAATGGATCCTCGACTTGATGACAACTCTTCCGGGTATCGGCA  
GACATGAATGTTTTCATCACCTGGGTTGTGGTTTCCACTTCTTCATAGGTAGTTCTCCT  
GCAGCAGCAGGAGACAATGCTACTAGCAGCAGCAACTGCGTTTCGAATTGCCGCCAGGT

OsWAKs-Supplemental Data 1[1].txt

TACCCCATACTGGCAACGGATGGCACATGCTATGGCATTGGCTGCTGCAACGCATCGGTG  
 GTTGAAGACCACAACCTCTACACGATCAAGCTTCTCTCCCTGCAGTCTAGTCCAAGGGCG  
 GTGCCGTTCAACGCGAGCATGGTGGTGGTGAAGGGGGAGTGGTGGAGGAGGGCAGACAAT  
 GCCATGCTGCTGCAGCAAGAGGTCTGTCAAGGCTGGGTGCCATCGCTGGGGCGCCGGAT  
 GCTGCAAGGAATGTGGGTGTCCGGACTGTGGTTAACTGGATGCTGGGTAACATCATCGTGC  
 GTGGAAGCTAAGAAGTTGAGTGATTTTGGGTGTCTCAGTGACAACAATATTAATGAATGC  
 ATGCTGCCAAATCCACCCCTATGCTTTGGGAAATGCATAAATACAGTAGGATCATATGAG  
 TGTATCTGTCCAGGTGGCACATCTGGTAACGCCCATATACAAAATGGATGTGTTTCAAGC  
 AAACTTAAATTTTCAGGACTCATCTTGGAAATAGGACTTGGTGGCAGTCTAATCATCGTG  
 GTACTAATTCTTACTGGAATTGTCTGAAGGCGAAAGTTCAAGTCTCGAAGGGCCAAAAAA  
 CTGAAGGAATTCTTCTTCAAGCAAAACCGAGGATTGTTGCTTCATCAACTTGTAGACAAG  
 GATATCGCTGAAAGGATGATCTTCAGCTTAGAAGAGCTTGAGAAGGCGACAAACAATTTT  
 GACGAGTCTCGAAAGCTTGGTGGTGGTGGCCATGGAACCGTCTATAAAGGGATTTTGTCT  
 GACCAACGTGTTGTTGCTATCAAGAAGTCAAGATATGCTATTAAGAGAGAAATTGATGGA  
 TTTATTAACGAGGTTGCCATACTTTCCCAAGTAAATCACAGGAATGTAGTGAAGCTTTTT  
 GGATGTTGTCTTGAGACAGAAGTTCATTGTTAGTCTATGAGTTCATTCCAAATGGAACA  
 CTTTCATGAATATCTTCATGTCAACTCTGCACAATCAGTCCCATGGAAGGAACGGCTGAGG  
 ATAGCACTTGAAATAGCTAGGTCTCTTGCTTATCTACATTCACTGCTTCGGTATCAATC  
 ATCCACAGAGATCAAGACCACCAACATTCTACTTGATGATAGGTTTCATAGCAAAAGTA  
 TCCGACTTCGGAGCTTCTCGAGGTATCCCAATTGATCAAAAATATTGTAACACTACTATC  
 CAGGGAACCTTTTGGATACCTTAGATCCAGAGTACTACCGTAAAAGCCGACTTACGGAGAAA  
 AGTGATGTATACAGCTTTGGTGTCTACTTGCAGGAGCTAATAACACGAAGAAGGCCAACT  
 TCCTACATATCACCAGAAGGCTTCAATCTAACCGAACAATTTATCTTGCTAGTTAGTGAG  
 GACAGGCTCTTGGAATAGTAGACAGTCAAATCACTAAGGAGCAGGGAGAAGAAGAAGCC  
 AGAGAAGTGGCAGAAATTGCTGTTATGTGCTTAACTTAAAGGGTGAAGACAGGCCGACA  
 ATGCGGCAGGTTGAGGTGAACTTGAAGGGTGCAGGGTCTGTAAACACTATCAGAGGT  
 CGACGTGCAGTTCAGTTGAATTCCTCATTGACTGAAGAGAGCGATTCCAACATCGTTGCT  
 GTTGGTGACGCTGTTATCACAACCTCAAGCAGGCGGCTCAGTATGGAGGAGGAATTCTGG  
 TCACTATGAGCTTTCTCGTTGA

>OsWAK76 9636.t03857, Chromosome 8, pre-processing  
 ATGCATCAGGTGCTCGAGATCTCCATCCCCAACGGCACCGTGCGCATCAACAGCAGCCGC  
 ATGGTGTGTTGCGTCTGCCGTTTTAGAGAACAGCACCACCATGCGGTGGGAGGTGGGTAAA  
 TCCTACTTCTGTGCGATTTAAACATTATAGCGTTGGTAGGATGCAACGCCCAGGTCTCC  
 CTCCGCGATTGGGGCGATACACTCGTCAACTCCTGCATCACGTCGTGCCCTCTATCACTC  
 GACTCCGGTAATGGCTCCTGCTCAGGAATTGGCTGCTGTGAGGCAAGCATTGCTATGCAC  
 ATACCGGTCTACAGCATTACGCGCAACCAAGTGGTGGACCCGGGTGCAGGACCTGACCCT  
 AATGAACCAAAATTTTTCTGTACATAGTACATCAGGCGTCGTTTTATTTGACACCAAC  
 ATGGTTACTAAGGGCATCAGCAATACTCCTGAAGCGCTCCAGCCATGTTAACTGGCTT  
 ATACTCAGCAATTCATCAGCGTGTCTGGCATCGACCAATGCTTCTGCACCTTCGTCTGCC  
 CCCGAATGTTGCAGCGCCAACAGCTTCTGCAAGGTTACAACGGTACTACTGCTGACTAC  
 GATGGGTATCGGTGCTACTGCTCCGATGGCTATGAAGGAAATCCTTATGTTGATGGTGGA  
 TGCCCGGTGAAGTATGTAGTACTACCTCCGTTTCAGATTATAAGACTTTTTAGCATTGTC  
 TATATTCAATAGATGTTAATAAATCTAGACACACATATATGTCTACATTCATTAACATAT  
 ATATGAATGTGGGTAATGTTAGAAAGTCTTATAATATGAAACGAAGGAAGTACATAATAT  
 GCTCTAGACTCTTCTTTCAATATTTTTTTATTTGTAATTGTATTTCAATATTAACCTTA  
 AACTCATCATTTAATATTTCTTATTTTATAATTTTGAATTTTATTTATTCTAAATTGTAT  
 TTCTATATCAACTTTATACTATTTTTCCAATATTTCTTATTTTACTTATATCTAGATTGT  
 ATTTATATATCGACTCCATACTATTTTTCCAATATTTCTTATTTTACTTATATCTAAATT  
 GTATTTCTATATGCACTTTAAAGTCTAAATACAATTTTAAATTTATTATATTTTATTCT  
 GAATTTAGTTAGTTCTAAATTTCTATATGGACTTTATACTATTCTTCAATATTCCTTTT  
 TAAAAATTTTGATTTTTTTTTTTGTTATTTCTAAATTGTATTTCTATATGGACTCTACCC  
 CTTTGCCTTTAATTTCTTTTTTTTAAATCCAAATTTTAGTTGGTTCAAAATTGTATACA  
 ATATGGACTCTAGACACCTCTTTCAATATACTCCCTCTATTTTAAATATATGACGTAGTTG  
 ACTTTTTTTATGATACGTTTAAACAATCTTTTTTTAGAAAAAGTTGTGAATTATCATTT  
 ATTTTATTGTGACTTAATTTTTTCAATATTTCTTTAAGCATGACTTGAATATATATTT  
 TTATATTTACACAAAATTTTGAATAAGACAAATGGTCAAATATTTGTTAAAATATCAACA  
 GTGAATATATTAATAAAGGAGGTAGTACCTTATTTCTTAATTCAAATTTTCACTATTT  
 TTAATTTGTATTTCTACATGGACTCTATTTTTTTCCGATTAATATGAGAAATTTCTAAA  
 CCATGAGAACGAACGTGGAGGTTTTTTCCCTGTTACTTTAATAAGTTAATAGATTGACC  
 GGGGATTTATTTCCAGTCAAGAGTGGGAATTAATCATTTCCAACAAGTCTCCTTCT  
 ATTTTCGTGAGATGAGATTAACCTGAACAACTAGGCTTTAACTATTTATAAGTGAACACC

OsWAKs-Supplemental Data 1[1].txt

GACTAACCTTTGCTATCGGTTTTGTCTTGATTGGTGGATGCTATCAACTTACATTAAGT  
 TTTATATTTATTACTTTCTTACAGAGTTATTACAGTAGAAAGACTTAGTCATATTTTAC  
 TGTAAAAAGTCTAATAACGTATACCCTCTGTCTTACCGGCCGACATAGTGGTAATAAGTG  
 CGTTCTTATTTTAGTCTACCCTTCTCTTATTTAATCTAACTTAATTTGTTCTGTTCTGCT  
 AGATATCGATGAATGCAATCTCCACACATCTACCCCTGTTACGGCGACTGCAAAAATAC  
 ACGAGGAGGGTATGATTGCCAGTGCCATCATGGATACAAGGGAAACGCTTCGATACTGAA  
 TGGATGTCAAGGTACGCATATATACTCCCATCGTATCAAACCTACAATTACTTTATGCCTC  
 TCCCTATTGACAGAGAAGTACGTAATAGACAGGCAGAGTAGCTTCATAGAGAAATTTAAT  
 AATTAGATTTTTTTTTGTTAATTTGTTTTAATTGACACTTGTGGCGAAGTCCATATATA  
 TCCCGGCCCATCGTTGGGGATAGCCTGCCAGACAAGGCCTTGTAGAGTTGCATAATAATT  
 TTCCAACATGGCAACCCATAATTTTGATACTAAGCTATTTAGTTTCAATTCGTTGTATT  
 ATGTAATGTAAATAAAATAAAATGAAGTTTTACTTTTCAATTTTTTAAATAGATTGTCCCA  
 TAATTTTCCAGCATTGCTACCCGTCCTTCCATTATATATGCTTACTAATTTATACTTCTT  
 CTGGGCAAATTTATTTGACGTTGATATAACTTAGTTTAGTTTCAATTAGACATCAAATATT  
 CTTAATAGAGAGAGTAATTTGATAATTTTATTTTCCCGTGGTATTTGTCTAGATATTAAC  
 GAGTGTGCGGAACAGAAAAATACTCATGCTATGGTGGACTCTGCATAAATACGCCAGGA  
 GCTTTTGTGGCGCTGCCACGACGGAAGCTACGGTGATCCCTTCACAAAAGGAGGGTGC  
 CGTTCATCTAAAGGTGACATTATTGCACAACCTATACTACGTACCGGCTATATATTAATCT  
 ATCTATGTATGCCTATGTTAATTAGAACTTCGAAGATGTTTACGTTAACCAGAAGAAAC  
 AGTGCACAACCTAATCATCCGCCGAATTAATGGTGAATTAAGAAAGGAACCCCTAC  
 GAGTTACAAGTTGATTATCAGTAATTTTAAATTTCAAAATTATACTAAAAATATACTGAC  
 TTGAGAGTTCAAACGCAGGTAAACATTATTTATTAATTATGTGTTCTAAAATTATTG  
 AACATTGAGAAAAACATAAATCGAGACATTCCTTCTTCAATTTTTATTTATAAATAATT  
 GTATTAATAAAATATAATGTTAATGTAGAATCGTAAAGGGTATTTCTTTACCCCAAAGC  
 TAGCCACTAAGAATGGGTGAATTAGTTAGTACCACAAATTTTGACAATTTAACCTTTG  
 CAAAACTATTTTACAATGAACCACCATCAAACTTATTTCAAAAATGACCTTTTGT  
 TCAGCGGCAAATCGTGTGGCGCTGAACCTTAGATACCTCAGTGCCAAATAGCACGGCGCTG  
 AATGTATGTTGGCAGCTGACTTAGCCTCCCATCCGCGGTGGCACGGCATTAGCGACAG  
 TTGACGTGACGCTGAGGTGTCTAAATTCACGCCACACGATTTGGCGCTGAAAAAATGA  
 TCATTTTTGAAATAAGTTTTGGCGGCGGTTATTTATAAAATTAGTTTTTGCAAAAAGTT  
 AAATTGTCAAAATTTGTGTAGTTAGTACAGTCTTCAGCTGCGACTGTGCCACTCTAGCCA  
 TGGCTACAGTGATGGGCACGAAAGAAAGGGTTCGATCGAGGAAGAACTAAGGGATAGGT  
 GACAAAATATGTCAACAAAACCATTGCCAAGTTTACTTTCAAAAAAGAACAAAATCATTG  
 CCAAGTAAGATGTTTAACTAGACGAAATTCCTTTGTGTGCGTACGTGCGCTTTAGCCTT  
 CTTTTATAATGTAGTATAGATTTTTCAAAGGAGGTGTACCGAGGCGCACCACAATGCC  
 CAATTATTTATTTTATCATTGTGCTAATGTAACCTCTCGTTCCGCAATTAAGGTTTCATC  
 CCTGCATAATCATGAAATTAGTTTCTTAATGTATCCTTTCTTCAGGTTTGACCATTGGTC  
 TAATAGTCAGCGGTGTTTCTTCTTCTTCTTCTAGGGCTTGTGCTCCCTTCATAGTTT  
 GCAAGGTCAAGCTACAAAGGTAAGAAAGAAATGAGGGATAAATCTTTATGCAAAACCATG  
 GGTTATTATTACAACAGTTAATATCACGAAACACAGACTTCGCCGAAAGAAATGATCATT  
 CCTTACAAGAGCTTGAGATTGCTACAAACAATTTTGACAATCTCGTGAGGTTGGTACTG  
 GAGGACATGGGGTCGTGTATAAAGGGATTATAGATCTACATGTTGTGGCCATCAAGAAAT  
 CAAAGATTGTTGTGCAAGAGAAATAGATGAATTCATAAATGAAGTCGAATTCCTTTCC  
 AAGTGAACCATAGAATGTGGTAAAGCTCTCGGATGTTGCTTGGAGACAGAAGTTCCAT  
 TATTAGTTTATGAGTTTCAATGGAACCCCTTACCATCATCTTCATGTTGAAGGAT  
 CTATATCATTACCTTGGGATGATAGATTAAGGATAGCTCTTGAAGTTGCTAGAGCTCTT  
 CATATCTGCATTATCGGCATCAATGCCAATATTTATAGAGATATTAATCTTCCAATA  
 TACTTCTTGATGACAACCTAACAGCAAAGGTATCCGACTTTAGAGCTTCAAGATATATCT  
 CAATCAATGAAACAGGAATAACTACTGCAGTTCAAGGAACGATTGGCTACTTGGATCCTA  
 TGTACTATTATACGGGACGACTTACGAGCAAGAGTGATGTTTTTGTGTTTGGTGTCTTC  
 TTATGGAGCTACTTACTCGAAAGAAACCCATCGGTGGTACATTTGATAATGGCGATGGTC  
 TTGTTTACATGTTATCTCACTTCTCTCAAAAGGTAATCTTTATAATATAATAGATTCTC  
 AAGTTAAAGAAGAGGAAGATGGAGAAGTCTAGAAAGTGGCAACACTAGCCACAACATGTA  
 CTAAGTTTAAAGGAGAAGAGCGGCCTACGATGAGAGAAGTAGAGATGGCACTGGAAAGCA  
 TAGTTTCAAAGAAAAGCTCCTTCTGTAACAAGAAGTCAATCAAGTAGTAGATCCGATG  
 AAAATCGAATTTTAGCTCTTTACATGTCGATCGAAGGAGTTACCAAGGACAAAACAATTA  
 CAATTACAGAAAGCAGCACGGAAGGGGAAATACCATTGTCGTCAAGGTTTTCTCGATAA

>OsWAK76 gi|32977381|dbj|AK067363.1| Oryza sativa (japonica cultivar-group) cDNA  
 clone: J013100G02, full insert sequence  
 GAGGTTTGAGGCACACTGCGAAGAATCAAAGATGGAGAACATGCAGTAGCATTAGCAGCATTCACTTTT  
 CTAGCCCGCCCCCTGCTGCAAGTCTGTTGTTTGTGCGGGGAACGGCAGCAGCTGCACCACCAGCTGCG  
 GCAACGTGAGCTTCGAGTACCCGTTCCGGCTGGAGGCCGGGTGCTACCACCCGGGGTTTCGATCTCACCTG

OsWAKs-Supplemental Data 1[1].txt

CAACCACTCGTACAGCCGCCAGGCTGTTCTGGGCCAAGAAAGCAGCACCATGCATCAGGTGCTCGAGA  
TCTCCATCCCCAACGGCACCCTGCGCATCAACAGCAGCCGCATGGTGTTCGCTCTGCCGTTTTAGAGAA  
CAGCACCACCATGCGGTGGGAGGTGGGTAATCCTACTTCTGTCGGATTTAAACATTATAGCGTTGGTA  
GGATGCAACGCCAGGTCTCCCTCCGCGATTGGGGCGATACACTCGTCAACTCCTGCATCACGTCGTGCC  
CTCTATCACTCGACTCCGGTAATGGCTCCTGCTCAGGAATTGGCTGCTGTGAGGCAAGCATTGCTATGCA  
CATACCGGTCTACAGCATTAGCGCCAACCAAGTGGTGGACCCGGGTGCAGGACCTGACCCTAATGAACCA  
AATTTTTTCGTGTACATAGTAGATCAGGCGTCGTTTTATTTTCGACACCAACATGGTTACTAAGGGCATCA  
GCAATACTCCTGAAGCGCTCCCAGCCATGTTAACTGGCTTATACTCAGCAATTCATCAGCGTGCTCGGC  
ATCGACCAATGCTTCTGCACCTTCGTCTGCCCCGAATGTTGCAGCGCCAACAGCTTCTGCAAAGGTTAC  
AACGGTACTACTGCTGACTACGATGGGTATCGGTGCTACTGCTCCGATGGCTATGAAGGAAATCCTTATG  
TTGATGGTGGATGCCGCGTAAGTATGTAGTACTACCTCCGTTTCAGATTATAAGACTTTTTAGCATTGT  
CTATATTTCAATAGATGTTAATAAATCTAGACACACATATATGTCTACATTCATTAACATATATATGAATG  
TGGGTAATGTTAGAAAGTCTTATAATATGAAACGAAGGAAGTACATAATATGCTCTAGACTCTTCTTTCA  
ATATTTTTTTTTATTTGTAATTGTATTTCAATATTAACCTCTAACTCATCATTTAATATTTCTTATTTTAT  
AATTTTGAATTTTATTTATTTCTAAATTTGATTTCTATATCAACTTTATACTATTTTTTCCAATATTTCTTA  
TTTTACTTATATCTAGATTGTATTTATATATCGACTCCATACTATTTTTCCAATATTTCTTATTTTACTT  
ATATCTAAATTTGATTTTCTATATGCACTTTAAAGTCTAAATACAATTTTAATTTTATTATATTTTATTC  
TGAATTTTCAGTTAGTTCTAAATTTCTATATGGACTTTATACTATTCTTCAATATTCCTTTTTTAAAAAAT  
TTGATTTTTTTTTTGTATTTCTAAATTTGATTTCTATATGGACTCTACCCCTTTGCCTTTAATTTTCTT  
TTTTTTAATTTCAAATTTTGTGTTTCAAATTTGATATACAATATGGACTCTAGACACCTCTTTCAATAT  
ACTCCCTCTATTTTAAATATATGACGTAGTTGACTTTTTTTTATGATACGTTAACAATTTCTTTTTTGA  
AAGTTGTGAATTATCATTTATTTTATTTGACTTAATTTTTTTCATCAAATATTTCTTTAAGCATGACTTGA  
ATATATATTTTTTATATTTACACAAAATTTTGAATAAGACAAATGGTCAAATATTTGTTAAAATATCAACA  
GTGTAATATATTAATAAAGGAGGTAGTACCTTATTTCTTAATTTCAAATTTTCAGCTATTTTTTAAATTTGTA  
TTTTCTACATGGACTCTATTTTTTTTCCGATTAATATGAGAAATTTCTAAACCATGAGAACGAACGTGGAG  
GTTTTTTTCCCTGTTACTTTAATAAGTTAATAGATTGACCGGGGATTTATTTCCACACCTCAGCAAGTGTG  
GAATTAATCATTTTCCAACAAGTCTCCTTCTATTTTCTGTGAGATGAGATTAACTGAACAAACTAGGCTTTA  
ACTATTTATAAGTGAAAACCGACTAACCTTTGCTATCGGTTTTGTCCTTGATTGGTGGATGCTATCAACT  
TACATTAAGTTTTATATTTATTACTTTCTTACAGAGTTATTACAGTAGAAAGACTTAGTCATATTTTTTAC  
TGTAATAAAGTCTAATAACGTATACCTCTGTCTTACCGGCCGACATAGTGGTAATAAGTGCCTTCTTATT  
TTAGTCTACCTTCTCTTATTTAATCTAATTTAATTTGTTCTGTTCTGCTAGATATCGATGAATGCAAT  
CTCCACACATCTACCCCTGTTACGGCGACTGCAAAAATACACGAGGAGGTATGATTGCCAGTGCCATCA  
TGGATACAAGGGAAACGCTTCGATACTGAATGGATGTCAAGATATTAACGAGTGTGCGGAACCAAGAAAA  
TACTCATGCTATGGTGGACTCTGCATAAATACGCCAGGAGCTTTTGTGTTGCCGCTGCCACGACGGAAGCT  
ACGGTGATCCCTTTCACAAAAGGAGGGTGCCGTTTCATCTAAAGGTTTGACCATTGGTCTAATAGTCAGCGG  
TGGTTTCAGTCTTCTACTTCTAGGGCTTGCTGCTCCCTTCATAGTTTCGCAAGGTCAAGCTACAAAGGGTA  
AAGAAAATGAGGGATAAATCTTTATGCAAAACCATGGGTATTATTACAACAGTTAATATCACGAAACA  
CAGACTTCGCCGAAAGAATGATCATTACCTTACAAGAGCTTGAGATTGCTACAAACAATTTTGACAAATC  
TCGTGAGGTTGGTACTGGAGGACATGGGGCTGTGATAAAGGGATTATAGATCTACATGTTGTGGCCATC  
AAGAAATCAAAGATTGTTGTGCAAGAGAAATAGATGAATTCATAAATGAAGTCGCAATTTCTTTCCAAG  
TGAACCATAGAAATGTGGTAAAGCTCCTCGGATGTTGCCTTGAGACAGAAGTTCCATTATTAGTTTATGA  
GTTCAATTTCAAATGGAACCTTTACCATCATCTTCATGTTGAAGGATCTATATCATTACCTTGGGATGAT  
AGATTAAGGATAGCTCTTGAAGTTGCTAGAGCTCTTTCATATCTGCATTTCATCGGCATCAATGCCAATAT  
TTTATAGATATTAATCTTCAATATACTTCTTGATGACAACCTAACAGCAAAGGTATCCGACTTTAG  
AGCTTCAAGATATATCTCAATCAATGAAACAGGAATAACTACTGCAGTTCAAGGAACGATTGGCTACTTG  
GATCCTATGTACTATTATACGGGACGACTTACGAGCAAGAGTGATGTTTTTGTGTTTGGTGTCTTCTTA  
TGGAGCTACTTACTCGAAAGAAACCCATCGGTGGTACATTTGATAATGGCGATGGTCTTGTTCACATGT  
TATCTCACTTCTCTCAAAAGGTAATCTTTATAATATAATAGATTCTCAAGTTAAAGAAGAGGAAGATGGA  
GAAGTCTAGAAAGTGGAACACTAGCCACAACATGTACTAAGTTTAAAGGAGAAGAGCGGCCTACGATGA  
GAGAAGTAGAGATGGCACTGGAAGCATAGTTTCAAAGAAAAGCTCCTTCTGTAACAAGAACAGTCAATC  
AAGTAGTAGATCCGATGAAAATCGAATTTTAGCTCTTTACATGTGATCGAAGGAGTTACCAAGGACAAA  
ACAATTACAATTACAGAAAGCAGCACGGAAGGGGAAATACCATTGTGTCGTAAGGTTTTCTCGATAATCAT  
TCTCTGTCTGAACGAGAACGCTTGAAGAAAGCCGGAACCTTAGTTACATCGATCCTGTTCTGTTCTA  
AATGATTGCTAAAGTAATTTTGTGTGTAACAATAATAATGCAACAGAAAAATTGTGTGCTATC

>OsWAK77, 3081. t00013, Chromosome 8, pre-processing  
ATGGAGAAGAGGAGGATGCTGAGGGCGAAGCAGAGGTTCTTCGAGCAGAACGGCGGCCTC  
CTCCTGCAGCAGCAGCTGGGTTCCCTGGCCGCTCCGGCGTGGCGTTCAAGATCTTCTCC  
GAGGAGGAGGTGAGCAAGGCGACGGACGGCTTCGCCGAGGCGCGGGTCTCGGCCGCGGA  
GGCCACGGGCTCGTCTACCGGGGCTCCCTCGCCGACGGCTCCACGGTGGCCGTGAAGCGG  
TCCAGGGTGGTGGAGGAGAAGCAGCTCAGGAGTTCTCCAGGAGATGCTCATCTCTCG  
CAGATCAACCACAGGAACGTCGTCAGCTGCTCGGCTGCTGCCTCGAGGTCCAGGTCCCC



# OsWAKs-Supplemental Data 1[1].txt

ATGCTCGTGTACGAGTACGTCCCCAACGGCAGCCTCCACCGGTACATCCACGGCGGCGGC  
GCGGAGCGCGGCGAGGGCCTGTGCGCGGCGGACCGTCTCCGCGTCCGCGGCGAGTCGGCG  
GACGCGTGGCGTACATGCACTCGTCGGCCTCGCCCCGATCCTCCACGGCGACGTCAAG  
TCCGCCAACATCCTGCTCGACGCCGGGCTCACGGCCAAGGTGTCCGACTTCGGCGCGTCCG  
AGGCTCGCGCGGCGGCGGACGAGGCCGAGGTGGCGACGCTGGTGCAGGGGACTTGCGGG  
TACCTCGACCCGGAGTACCTGCTGACGTGCCAGCTCACCAGCAAGAGCGACGTGTACAGC  
TTCGCGGTGGTGTCTCTCGAGCTGCTCACGGGGAGGAAGGCCTTCTGCCCGCGCGCGGAC  
AGCGCCGCGGCTCGCAGGACGACGACGACGACGACGACGACGACGACGACGACGACGACGAC  
TTCCTCACTGCGGCGCACAAAGGGACGGCACCGGGAGATCATGGACGGGTGGGTGAGGGAG  
GAGGTGCGAGGCGAGGTGCTCGACAACGCCGCGGAGCTGGTGTGAGTGCCTGAGCATG  
GCCGGAGAGGAGAGGCCGACCATGAAGGAGGTGCGCGACAGGCTCGCCGGGATGAGAAGC  
CGCGCAAGCGATTTCATAA

>OsWAK77, 3081.t00013, Chromosome 8, post-processing  
ATGGAGAAGAGGAGGATGCTGAGGGCGAAGCAGAGGTTCTTCGAGCAGAACGGCGCCTC  
CTCCTGCAGCAGCAGCTGGGTTCCCTGGCCGCTCCGGCGTGGCGTTCAAGATCTTCTCC  
GAGGAGGAGGTGAGCAAGGCGACGGACGGCTTCGCCGAGGCGCGGGTCTCGGCCGCGGA  
GGCCACGGCGTCTGCTACCGGGGCTCCCTCGCCGACGGCTCCACGGTGGCCGTGAAGCGG  
TCGAGGGTGGTGGAGGAGAAGCAGCTCAGGGAGTTCTCCAGGGAGATGCTCATCTCTCG  
CAGATCAACCCACAGGAACGTCTCAAGTCTCGGCTGCTGCCTCGAGGTCCAGGTCCCC  
ATGCTCGTGTACGAGTACGTCCCCAACGGCAGCCTCCACCGGTACATCCACGGCGGCGGC  
GCCGGAGCGCGGCGAGGGCCTGTGCGCGGCGGACCGTCTCCGCGTCCGCGGCGAGTCGGCG  
GACGCGCTGGCGTACATGCACTCGTCGGCCTCGCCCCGATCCTCCACGGCGACGTCAAG  
TCCGCCAACATCCTGCTCGACGCCGGGCTCACGGCCAAGGTGTCCGACTTCGGCGCGTCCG  
AGGCTCGCGCGGCGGCGGCGGACGAGGCCGAGGTGGCGACGCTGGTGCAGGGGACTTGCGGG  
TACCTCGACCCGGAGTACCTGCTGACGTGCCAGCTCACCAGCAAGAGCGACGTGTACAGC  
TTCGCGGTGGTGTCTCTCGAGCTGCTCACGGGGAGGAAGGCCTTCTGCCCGCGCGCGGAC  
AGCGCCGCGGCTCGCAGGACGACGACGACGACGACGACGACGACGACGACGACGACGACGAC  
TTCCTCACTGCGGCGCACAAAGGGACGGCACCGGGAGATCATGGACGGGTGGGTGAGGGAG  
GAGGTGCGAGGCGAGGTGCTCGACAACGCCGCGGAGCTGGTGTGAGTGCCTGAGCATG  
GCCGGAGAGGAGAGGCCGACCATGAAGGAGGTGCGCGACAGGCTCGCCGGGATGAGAAGC  
CGCGCAAGCGATTTCATAA

>OsWAK78, 3081.t00017, Chromosome 8, pre-processing  
ATGGATCGATTTGCCATGCCATGCCAGGTCTCTGTTGACCTCGTCCATCGCCATTGCGCA  
ATCGGTGTAGCTATGCTGCTAGCTGATCGATCAGTTATGGCGATCCAGCAACCACGAGCT  
CTCAATTATGAAGGCAGCCGTAATCACACGCAGCGAGAGAGAGAAGGCGCAACGAGAGTA  
ATGGAGGTGTTTTAGTTTGGAGGGCACTTGTATGGCTGGCGCTGATCACTCCAGCAGCG  
CGCTTGGCGCAGCAGGAGGCGCGGGATGCCGGCGGCGGTGCGGCAACGTGACCGTC  
CCCTACCCCTTCGGCATCGGCTCCGAGCGCTGCTACCGCGGCGGCGTGGGGGGTTTTGCG  
CTCGACTGCGACGACGCCCCGACGCCCCGCGCGCCTCACAGTTGCCGGCTACGGCCACGAG  
GTGACCTCCATCTCCCTCGCCGCGCGCGAGGTACCGTGCTGCTCAACGCCAGCCGCGCG  
TGCTACGGCGGCGGCGACTACGGGCGCGGCGCGCGGGGGCGGGAGGAGCAGCCCATGTCC  
CTCAACGGCAGCGCTTCTCTCTGTTCCATGAAGAGCAAGTTCTGCGCATCGGCTGC  
CCCGGCTCGCCTACTTCGTCGACGACGCGGGGACTACGTACCGGCTGCATGTCCGTG  
TGCCGGCGTGGCGCGGGCGCTGCCGGGCTCGTGGCGGGCGACGACGCTGCTGCCAG  
AGCAACATCCCGCTCAGGGCTCGCCTCCTACCGCGCGCCTCCGAGCTTCGGCCGCGG  
CCAGGGCGGCGCCTTCTTGCCAACGCCACCGCCTGCGCCTACGCTTTCATGGTGACGC  
ATGGTGGTTCTGGTACGCGGCTCAAACCTCAACCGGACGGGCGACTTCGCCGTGCCGT  
CGTGTGGACTGGGCCATCCGGCCGGACGCCGGGAGCGGGAGCGGGAGCGGGAGCTGCGC  
CGCCGCAAGCCGACGCGCTGCCGTGCTACGCCTGCCGGAGCGCGCACAGCGTCTGCAT  
CGACTCCAGCAACGGCCCTGGGTATATCTGCAACTGCACCGCGGGTACCACGGCAACCC  
GTACGTGCTCGGCGACTGCACAGGTCTAAATCTAATTTTTGTTACTCCTCCGTTTTAGA  
ATATAAATCGTTTTTATTAAGTTTGTAGACAAATTTAATATTTACAACATCAAATTA  
TTTTATTAATCAATAATTAATATATTTTTATAATATATTTGTCTTGGCTAAAAATATT  
GTTATCTTTTTTACTAATTTGATCAAACCTTAAATAACAGTTTGACTTTTTACTAAAATCA  
AAACGACTTATAATCTGAAATGGAGAGAGGTACTTCTCTCCCTCTCATCATCATCCCACT  
TCAGTTTCATCTGATGGTGATTTTTTCTGGCCTTTAATTAATTACTTCTCATGTTATTT  
GTGGATTTAAATTGAAACAAATTATTAAGACATCAACGAGTGCGAGCACAAAGATGAGTA  
CCCCTGCTACGGCGTCTGCACCAATACGGCAGGCAGCTACGCTTGCTCTTGCCCCAAGGG  
ATCCAGTGGAAATGCCAGCGTGGAGGGTGGTGGCGCGCGACGACAAGTTCACTCTAGC  
ACTCAAGCAGGTACAGGTACCTACGAAAGATTTTTTTTATATATTTTATATATTTTTTA  
TATACCTTTCCAAAAAGTATTTTTTAAATATGAATTTTGACTACGCCAGCCTGTGGCCAAA

OsWAKs-Supplemental Data 1[1].txt

TAAC TTTGTCACGTCACGCACAGCTGGCGCGGCAGTGCTGCTCTGCCACACTAGCCTCTT  
GCCACGCTACCATGGCTGGCGTGGCAAAACAACGCTTCAACGCCAAAAGGTTTAGTTTTT  
GAAATATTTTTTAAAGACGGTATATTAATAAAATTAATAAAATTAATAAAAGTCTAAAAAATA  
AAAAAATTCTCCTACAAAACGGGATTCTTCACCTTAACAACAAATAATCTTGACTTTATA  
TCACTATGTCACTGAACCGAAAATCACCTGACACTGACGTTACAGCAGAGGATCCATATC  
TGTTGTACCAATATATGATACCTCTGTCCCAAAATATTAGGACAAGATGATATTACTTGT  
TCGGATTTCGTAATATTAGGAAATATCACCTTCTACACTAGTCGTAATAATTTGAGTTTGG  
AGAAAGCAGTGACAGATAAGCCAGCAGCTTAG

>OsWAK78, 3081. t00017, Chromosome 8, post-processing  
ATGGATCGATTTGCCATGCCATGCCAGGTCTCTGTTGACCTCGTCCATCGCCATTGCGCA  
ATCGGTGTAGCTATGCTGCTAGCTGATCGATCAGTTATGGCGATCCAGCAACCACGAGCT  
CTCAATTATGAAGGCAGCCGTAATCACACGCAGCGAGAGAGAGAAGGCGCAACGAGAGTA  
ATGGAGGTGTTTTTAGTTTTGGAGGGCACTTGTATGGCTGGCGCTGATCACTCCAGCAGCG  
GCGCTGGCGCAGCAGGAGGAGGCGCCGGGATGCCGGCGGCGGTGCGGCAACGTGACCGTC  
CCCTACCCCTTCGGCATCGGCTCCGAGCGCTGCTACCGCGGCGGCGTGCGGGGGTTTTCGC  
CTCGACTGCGACGACGCCCGACGCCCGCCGCGCCTCACAGTTGCCGGCTACGGCCACGAG  
GTGACCTCCATCTCCCTCGCCGCCGCGGAGGTACCGTGCTGCTCAACGCCAGCCGCGCG  
TGCTACGGCGGCGGCGACTACGGGCGCGGCGCCGCGGGGGCGGGAGGAGCAGCCCATGTCC  
CTCAACGGCAGCGCGTTCTCTCTCGTCCATGAAGAGCAAGTTCTGTCGCCATCGGCTGC  
CCC GGCTCGCCTACTTCGTGACGACGCGCGGGGACTACGTACCGGCTGCATAGCAACA  
TCCCGCTCAGGGCTCGCCTCTACCGGCCGCGCCTCCGCAGCTTCGGCCGCCGCGCAGGGC  
GGCGCCTTCTTGCCAACGCCACCGCCTGCGCCTACGCTTTTATGGTGGACGCATGGTGG  
TTCTGGTACGCCGGCTCAAACCTTCAACCGGACGGGCGACTTCGCCGTGCCCGTCTGTGCTG  
GACTGGGCCATCCGGCCGGACGCCGGGAGCGGGAGCGGGAGCGGGAGCTGCGCCGCCGCA  
AGCCGCACGCCGCTGCCGTCTGACGCTGCCGGAGCGCGCACAGCGTCTGCATCGACTCC  
AGCAACGGCCCTGGGTATATCTGCAACTGCACCGCCGGGTACCACGGCAACCCGTACGTC  
GTCGGCGACTGCACAGACATCAACGAGTGCGAGCACAAAGATGAGTACCCCTGCTACGGC  
GTCTGCACCAATACGGCAGGCAGCTACGCTTGTCTTGTCCCAAGGGATCCAGTGGAAT  
GCCAGCGTGGAGGGTGGCTGCCGCCGCGACGACAAGTTCACTCTAGCACTCAAGACGGTC  
ACAGGAAATATCACCTTCTACACTAGTCGTAATAATTTGAGTTTGGAGAAAGCAGTGACA  
GATAAGCCAGCAGCTTAG

>OsWAK79 9637. t01754, Chromosome 9, pre-processing  
ATGGCGGGCGGCATGAGCGATGGATCCGGTGCCGCGACGACAGCGGGCGGCGTGGGCGAT  
GGATCCGACGCCGGCGGGTGGCGGGGGCGATGAATCCGGCACCGTGCGGCGGTGGGCTAG  
GGTTTGGGATTTTTGATTTTTTTTTTTTTTTTTGTTTGTGAATTTATTTTCGCATGCGG  
CTGGTATAAGCAACCGCATGCGGTTGGGCCGGCCGATGCGAAAAGGGTGATTTTTTGC  
AGACCTTCTCGCATGCAAAGATGCCTTTTGTCTGATGGAAAAAGCCTTTTTTACTAGTG  
TACAACCTGAGGTGATGTCTTCTGTACTTTTGGCACATTTAACATGAAAAAGTAAAAAAA  
AAGAAAATGGTATGTTGAAGGATTGAATGATAACTCAGGTGATATATATTACTTTTAT  
TCTTCTTAGTATCTCAAAGTCCATTATATTAGGAACAAATAAATGGGATAATATTTGACG  
GATAGAGATTAATAAAGTATGGTAGCTCTCACTAAATTTCTCACAGAGGCTCATTGGGGT  
TAGTCCACAATAATATTTGCCTGATTTAGCAGATTTTGTGCAATTTGTTTTACTATAT  
AATAATAAAATAAAACATGCCTGGTGACAATGTCTTCTAGTCGTAGCCAATGTATAATC  
AGCTATTGCTTCTAGTATTGACTATATATTACCTATATATATAACATGCCTGCAGGTT  
GTAACAGGTTGTGTATCAAAATGCGAACGTGCCCTTAAGGATGGTGAATGCTCTGGTGAT  
GGTTGCTGCCAAGTTGATTTCCCGACAAAGGGATGGCGTTATAGTACTACTTTTCGATAGT  
GAAAACATAAATACCAGTCTAATATGGAGGAACAACCCGTGCAGCTATATGGCAGTGATA  
GAGACCACAGCTTTCAAATTCCTACTATATTCTATGACACATATAATGGGGCAGCTCCCGT  
TGTCCTAGACTGGATCATATATCAATGGATGTATGTGATATTGCTATAAAAAACACCACT  
TCATATGCGTGTATTAGTGAAACAGTAACCTGTGTGATGATATAAAGGGAGGTTACCGT  
TGCAAGTGCTCCCATGGATACGAAGGCAACCCATACATTAAGATGGATGCAAAGGTACA  
GCTATGCGCTATATTAATACATTATATAGATAGCAGAAATATTAATGTTAACCAG  
CGTGGTGGTTTTATTTAGATATCAATGAGTGCCCTTGACAACGCTACTTACCATGCATG  
GGAATATGCAAGAATACGATAGGGAGTTTTGATTGCTCATGCTACCCAGGAAGTTATATG  
AAGAATGGATTCTGCCTGCCTAATCAAAAGTCCACTTTTCTGCTAGGCATGTAATAGGT  
ATAGGCTCCTTTCTTCCGTACAAAAAGATAATTACATGTGTGGGCATCAACCTGAAAGTA  
GTAATTAAGATTGCGCCACATTACTCACTCAATCCTTGATTTCAAATACAAGAGCTCA  
TCATTACGAATTGAGATTTTTTTTTTTTTTAAAGAACATACGAAGAGGTAATAATTTT  
TAGCGTAAAATTTGATATTTTATCTTGTAACTGAGATATTAAGGTACAAAATTTG  
TAATAGAGAATACGCTACCTTCTTAAAAAAGGTACACGAAAGCTTTTGTATGATAAAC

OsWAKs-Supplemental Data 1[1].txt

TTTTGGCTATATCATTTTTACGTATATACCTGAAACCTACACTTTAAATAATAAATAATT  
AAACACATTCTTTCTGACTGGAGGGAGTAGAATTAGATTCATAGTTACTTGAATAAATAA  
TATCCCTCTCATGAATGAATGATTGATCATTTTTATTGTATTAATGAATGCGGACAAGTG  
CATTTTAATGTACGATCTTAAACTTGCCTAGCAGTATAAAACGACCAATATTTGATATTA  
GATGGAGTAAAATAAAGTCTATGTGACTTCGTATCACGAACTTCATGGTTACCCATGAG  
ATATTATTGCTAGCAGCTTTATCTAGTATTGTACACACAGTTTTCTACCATTTTTATTCAA  
AAAGAAGTTGTTTAAATAGCCTAAAACAAACAAGATCCAAGCCAAGATCGCATAACCTAA  
ACAAGGACCAATAATCATTAGGCCATGCATGGATCTTGGTCGTGTTTGCCATGGATCTT  
GGTCGTGTTTAGTTGTTTTGGCAAAAATATTTTGACTATACGGACACATAGGGTTGTTTT  
GGTTTGATACCAAAAAATATGCCCTACCAATTTATAAACAAATTGAATACTATATGTGTT  
AGTTTGGATTGAGCCAAATATTTGATAGTGCCCAATCCTATTTGGTCATATCCTAGAAG  
TTTCTTCTTATACAATGAGAATTTGGCTTTATATTGGTAACAATCCAAATGATTGCTAA  
ATAATTTTACCCTACCAATATTTTGGTAGTGCCAAAGTTTGCCTAGACTTTGGCACTACC  
AATGAATTTGGTAGGGTAAAGAACCAACAAGTCCATATTTAAAGTATTAACGTAGACTA  
ATAACAAAACAATTACATATTTTACCTGTAAACTGCGAGACGAATCTATTAAGCCTAATT  
AATCCGTCATTAGCAAATGTTTACTGTAGCACCATATTGTCAAATCATGGAGTAATTAGG  
CTCGAAAGATTTGTCTCGCAATTTACATGTAACTGTATAATTGGTTTTTTTTCGTCCACA  
TTTAATGCTTCATGCATGTGTCCAAACATTTGATTTGACGAAAAAGTTGGAAGTTTGAAG  
GGAAGTAAACACAGCCTTTCTGTACATTTCAAAAAAAAATCATAACTCTAGTTTACTTT  
TGAATTTGTCAGGTGCAAGTGTGGGTTTCGTATCCTAGTGATTGCCATAACTTTTGCAT  
GCTATGTCCAACAGAGAAGAAAACTACAACATATAAAAAACAATTATTTTCAACAGCATG  
GTGGTCTGATACTATTTGAAGAGATGAAATCTCAACAAGGTCATGCATTCAAAATCTTCT  
CCGAAGAAGAATTGCAACAAGCGACAAAGAAATTTAATGAACAAGAAATCTAGGCCAAG  
GAGGCAATGGAATTTTACAAGGGGCTTCTCAAGAGCAACTCTGAAGTAGCTGTCAAAA  
AATGCATGACAATTGACGAGCAAAAGAAGAAAGAGTTTGGTAAAGAAATGCTAATCCTAT  
CCCAGACCAACCACAAAAACATTGTTAACTATTAGGTTGTTGCCTCGAAGTGGAGGTCC  
CATGCTTGTGTACGAGTTTCATCCCGAACGGTACACTCTTCCATCTCATCCATGAAAACCA  
TGGTAATCACATCTCTAATCACTCGCCTTCGGATTGCCCATGAGTCTGCTGAGGCGCT  
TGCCTACCTCCACTCTTGTGCTTCACCACCAATCCTACATGGTGATGTCAAGTCATCCAA  
CATCCTCCTTGACAACAACCTTCTCAGCGAAAGTCTCAGACTTCGGTGCTTCTATCTTGGC  
TCCAACGGATGAGATGCAGTTTGTACGCTAGTCCAAGGAACCTTGTGGGTATCTTGACCC  
AGAGTACATGCAACATGCCAATTAACAGATAAGAGTGATGTATAGCTTCGGAGTTGTTT  
TTCTCGAAGCTTCTCACACGCAAGAAGGCATGCAACCTTGATGCACCAGAACATGAGAAAG  
TCTTGTGATGATGTTTCTCTCTGCGATGAAGGAGAACAAGCTCGAGGATATGTTGAATG  
ATCAAATTAAGAATAACGAGAATATGGAGTTTCTGGAAGAAATGGCAGAGTTAGCAAGAA  
AATGCTTAGACATGTCTTCCATAAATAGGCCATCAATGAAGGAAATGGAGACGAACCTTG  
GTAGGCTAAGGAAGGTGATGGAACACCAATGCGCAAGACAGAACCCAGAAGAGATGGAGA  
GCTTTCTTGGGGATTCTATCTTATGTGATCAACTCAACTGTTGAGAGCACAAAAAGTTTCA  
GCATTGAGAAGAACGCTATGAAGCGTCTCAAATCAGGGCGCTAA

>OsWak79 9637.t01754, Chromosome 9, post-processing  
ATGGCGGGCGGCATGAGCGATGGATCCGGTGCCGCGACGACAGCGGGCGGCGTGGGCGAT  
GGATCCGACGCGCGGCGGTGGAACAGTAACCTGTGTCGATGATATAAAGGGAGGTTACCGT  
TGCAAGTGCTCCCATGGATACGAAGGCAACCCATACATTAAAGATGGATGCAAAGATATC  
AATGAGTGCTTCTGACACGCTACTTACCCATGCATGGGAATATGCAAGAATACGATAGGG  
AGTTTCGATTGCTCATGCTACCCAGGAAGTTATATGAAGAATGGATTCTGCCTGCCTAAT  
CAAAAGTCCACTTTTTCTGCTAGGCATGTAATAGGTGCAAGTGTGGGTTTCGTATCCTA  
GTGATTGCCATAACTTTTGCATGCTATGTCCAACAGAGAAGAAAACCTACAACATATAAAA  
AACAATTATTTTCAACAGCATGGTGGTCTGATACTATTTGAAGAGATGAAATCTCAACAA  
GGTCATGCATTCAAAATCTTCTCGAAGAAGAATTGCAACAAGCGACAAAGAAATTTAAT  
GAACAAGAAATTTAGGCCAAGGAGGAATGGAATTTTACAAGGGGCTTCTCAAGAGC  
AACTCTGAAGTAGCTGTCAAAAAATGCATGACAATTGACGAGCAAAAGAAGAAAGAGTTT  
GGTCCCATGCTTGTGTACGAGTTTCATCCCGAACGGTACACTCTTCCATCTCATCCATGAA  
AACCATGGTAATCACATCTCTAATCACTCGCCTTCGGATTGCCCATGAGTCTGCTGAG  
GCGCTTGCCTACCTCCACTCTTGTGCTTCACCACCAATCCTACATGGTGATGTCAAGTCA  
TCCAACATCCTCTTGACAACAACCTTCTCAGCGAAAGTCTCAGACTTCGGTGCTTCTATC  
TTGGCTCCAACGGATGAGATGCAGTTTGTACGCTAGTCCAAGGAACCTTGTGGGTATCTT  
GACCCAGAGTACATGCAACATGCCAATTAACAGATAAGAGTGATGAGAACAAGCTCGAG  
GATATGTTGAATGATCAAATTAAGAATAACGAGAATATGGAGTTTCTGGAAGAAATGGCA  
GAGTTAGCAAGAAATGCTTAGACATGTCTTCCATAAATAGGCCATCAATGAAGGAAAT  
GGAGACGAATTTGGTAGGCTAAGGAAGGTGATGGAACACCAATGCGCAAGACAGAACCCA  
GAAGAGATGGAGAGTTTCTTGGGATTCTATCTTATGTGATCAACTCAACTGTTGAGAGC  
ACAAAAAGTTTTCAGCATTGAGAAGAACGCTATGAAGCGTCTCAAATCAGGGCGCTAA

>OSWak80 >9637.t02571, Chromosome 9, pre-processing ng  
 ATGGCCAGCCGCCCGCCGCTTCTTCTGCAGTACTCGTCGCTGCTGCTGCTGCTTGCCTTGC  
 GTCTCGGCGCCGCCGCCGCCGAGCCGGCAACGTGCCGGCGCCGGTGGCGGCCGTCTCGAAG  
 CCGGGCTGCCCGACCAAGTGCGGCGCCGTGGACATCCCGTTCCCGTTTCGGCATCGGCGAG  
 CACTGCGGGCTCGAGGCGCCTTACACAAACTACCCGTTCAAGTTCGACTGCAAGCCCGTT  
 GACGCGACCAGCAAGCCTTTCTTCAAGGATATGGAGGTGACCAAGATCTCCATGGAAGAC  
 GGCAAGGCCGTGGATGAAGATGAACATATCCAAGAAGCTGCTACAACAGTCGACGGGCGACC  
 AGGGAGGACAACACCAACACAACATCTGTGAGCTTCAGCCGCTCGCCTTTCTGGATATCG  
 GACAGGGATAACAAGATCATCGTCATCGGGTGCGAAACGTTTTCTGATATATGCAGATCAAT  
 AATGTAAGTATATGCCATAATTCGTCAATCTGGTTGCATTAGATCACAATACTCAAA  
 GTGTTCATATATATGGCCTTTAAAAATACATGATAGTCTAAATATTATTTCTTTATAT  
 TCAAGGACGCACTTAGGATTTGTCAATGTGAGATATTTAGTTCTCCCTTTACATATGCA  
 TGTGGAATCGGTGTGGAATAATTTGACCGCTGCTATTTTCAAGTTGACTTTTTGAAAACGATA  
 TGACAATATTTTCTTTAAAAAGTACTTTCAAATATTATAAATGTGCTATATTTTGTGTA  
 CATTTTAATATTAGTAATTAATAATCAAAGTGATGTATTGGTGATTGTGTAGGTATCCAA  
 AACAACACTTACTTGTGAATTGGAGGTAGTGTGTATATATGAGAAATTCAGAGCATAAGT  
 ATATATAATTTGTAGTGGTTGGAAGTTGGCATGTGGCCAAATGGCTGGGTGGTGTGATT  
 GTAAGCCTATCAATGTTTAAATCCTACATTTTCATATTAGTGTCATCGACATTAGGAGTA  
 AGGAGTACATATGAGCATATTCGTTCAATGGAAATACATGTGCCTACCTACAATTCAGAG  
 CCTTTTGATACTTTTGATGGAGTATATGAAATTGTGAATACAAACATACTCTTGGTGTGT  
 TTAGTTCTTTGGCCAATTTTTTTTTTAAGTATACAGCACACATTTAAAGTATTAAACATAA  
 ACTAATAGCAAAACAAATTATACATTCGCTGTGAAACTGCGAGACAAATTTATTAGGAC  
 TAATTAATCCGTCATTAGCAAAATGTTTATTGTAGCATCATATTGTCAAATAATGGTGTA  
 TTAGGCTCAAATGATTCATCTCGCAATTTACATGCAAACTATAAAATTTGGTTTTTTTTCG  
 TCCACATTTAATGCTCTACATGTGTGTCAAACATTCGATGCGACGTTTTTGGGCAAAAAA  
 AAATGAATCTAAACACGGCCTTTCTCAAATTAAGGGTGTGCTTGAAAATCGTGTCAAT  
 TCCCAATAGGATGTGTGTGTGGGGGGGAATTTTGGATCATTGTCAAATCTTGATTA  
 AGGTGTATATATAATACGTAACATGTGCAGGTTTTAACAGGTTGTGTGCCCTCATGCAGA  
 AACGACCCCAAGGACGGTATATGTTCCGGTGAAGCGGGTTGCTGCAAACCTGATTTCCCC  
 AATGGCACAATGGTACTATAGTACTTTTCAGTAAAGAAATAATAACAGCAGTCTTGCG  
 AGCTTCATAACAGTGATGGAACCCACAACCTTCAACTTCAACAAAAAATTTTCAACTCC  
 ACTACATTTCTATGACACATACAATGGGTTAGCTAAGGTTTCCCTAGATTGGATCATAACA  
 ATGGATTCATGTGATCGAGTCAAAAGAAACACTACTTCATATGCATGCATTAGTGGAAAA  
 AGTCGTTGTGTTGATGATCCAAAGGGAGGTTACCGCTGCAAGTGCTCTGATGGATATGAA  
 GGCAATCCATACGTCAAGGATGGATGCAAAGGTATAGTCATACACACCTTCTTATGGCTG  
 CTGCCTATCTTTGTATACAAATGATAGATAAGTATGCAACAAATTTAACCAATGTGTTGAT  
 GGTTTGGCTTCAGATATTAATGAGTGCCTCGACAAGTCTACTTACCCTTTGTCGGGAATA  
 TGTAAGAATACGTTGGGGAATTTACCTGCTCATGCTACCCTGGAACTATATGATGAAT  
 GGAATTTGCATTCCAAATCAGAAGTCTGGTTTTCTAAAAATCTTGTAATAGGTGAGTTC  
 GTCTCTTCTATAAGAATTAATGAGTGGCATGTGAGATCGATATACATTTATGTTTTGCTT  
 ATACATTTGTGCTATATTTAGTTATTTACTATATAGTAGCTCTATCGTTTTCTCATGCA  
 GATATAGAAAAATATAATCTAATTTACAATGCCTCTACTATATATAGTTATATGTTT  
 AAAAAATGGTATTCTGTTCTGGCTTTCAAGTTTAAACAATAAGGTGTGTATGCATAATTAAT  
 GTATTTTTTCATTCTGAAGCTAGCCCTCATTTATCTACCTTTTACTTTAGCATTTAGTAT  
 ACATTCATTCTTGCAACTATATCTCTTTTCTAGATATTCCTAATATTAATTTGTACACCA  
 TAGCAAGACCAGCAACCACTGATGAATCATGCATGCATGGTGTGATTTTTCTATAGTAA  
 GAAGAATGGACACATTTTTTGTATCATGAACATTTTCATGTTCCAACCTAATGATGAAATCCT  
 CACGAACCTCTCAAGTTGCTAAAGAAAAAATAATTTAGTGAATCTTCTCTGCCAATGC  
 CGATGTGGCATATGTGGGACTTCTTTGGGGCTAGCATAAAGGATCAACTACACATTTCCA  
 ATAATCTTTTCATAGCAATTTCAAAGTTTTCTATTATATATGCGAGGAGCAAGTTTGGGG  
 CCGTATTACTAGTGATTATAGTAACCTTATGCATGCTTCATCAGAGAGAAGAGAAAGCTAC  
 AGTATGTCAAAGGCGGTACTTCCGCCAATCATGGTGGTATGTTGCTATTGCAAGAGATAA  
 AATCTCAACAAGGCATTTTCATTTCAAATCTTCTCAGAAGAAGAAATGCAACAAGCAACAA  
 ACAAGTTTGACAAACAACAAGTCTTTGGCCAAGGAGGCAATGCAACTGTTTACAAGGGAC  
 TTCTCAAGGGAAACACGGAATAGCCGTCAAAGATGCATCACAATTGATATGAACAAAA  
 AGAAAGAATTCGGCAAGGAATGCTAATCTTGTCCCAACCAACCATAGGAACGTTGTCA  
 AATTATTGGGTTGCTGCCTCGAAGTAGAAGTTCCGATGCTTGTCTATGAGTTCATTCCAA  
 ATGGCACATTGTTCTCTCTCATCCACGGGAACCACAATCAACACATCTCCTTGGATACTC  
 GCTTACGTAATTGCACATGAATCTGCAGAGGCTCTTGCCTATTTACACTCATGGGCATCAC  
 CACCGATCTCTCATGGGCATGTCAAGTCTCAAATATCTCTTAGACAAAGATTATGTAG  
 CAAAAGTTTCTGACTTCTGGTGCTTCCATCCTAGCACCAACTGATGAGTCGAGTTCTGTCA  
 CTCTCGTTCAAGGAACTTGTGGATACCTCGATCCAGAGTACATGCAACATGCCAGTTAA

OsWAKs-Supplemental Data 1[1].txt

CAGATAAAAGTGATGTATATAGCTTTGGAGTTGTTATTCTAGAATTGCTCACAAAGAAAGA  
AAGCATTCAACCTTGAAAGCCCTGAAGATGAGAGGAGCCTAGCCATGAGGTTTCTATCAG  
CCATGAAGGAAAAAAGACTTTTCTGATATTTTAGATGATCAAATCATGACGGGAGATAATT  
TGGAGTTTCTTGAAGAGATTGCAGAGTTAGCAAAGCAATGCTTGAAATGTCTGGTGAGA  
ATAGACCGTTGATGAAGGAAGTTGCAGACAAGCTCGATAGGTTGAGGAAGGTAATGCAAC  
ATCCATGGGCACAACAAAATCCTGAAGAGATGGAGAGCTTACTTGGGGACTCTTCTTACG  
AGTCAACAACCTCAACGGTTGAGAATACAGGAAATTTCAGCATCAATAGTGAAC TTCAGT  
GTCTAGAATCAGGCGTTAA

>OsWAK81, 5662.t00009, Chromosome 9, pre-processing  
ATGGAGCGTCATCAGCTTCTTCTTCTTCCGGATGCCTTCTTCTCTACCTTGGCGCCATC  
GCTACGCTTGCCGCGGCCGACGTCGCAATTCGGGCCGGTGGCCAGCTCTCCGGGCTGCCCG  
ACAAGGTGCGGCGACGTCGACATCCCTACCTTTCCGGCATCTCGACCCAGACGCGG  
GACTGCGCCTACAGCAGGGGCTTCCAGCTGAACGTGCACGTCCGTGAACGGCGCCGCGAGG  
CCTATGTTTTACAATATCGAGGTGACCAACATCTCCGTGCCAACGGAAAAGCATGGATG  
AAGACGAACATATCTCTCCAGTGCTTCGACCCAGAAACAAACAGAACCTTGTACGATGAC  
ATATGGAACAGTTTTAGATATTCACCTTACTGGCTGTCAAACGAGGACAACAACATTCATC  
GTTGTTGGTTGCAACTACTAGCTTACATGCGCAGTACCTCGTGTAAGTAATTTTTGCATA  
TTTTATACATTATCAGTTTTCTTAAGGAATAGGAAAGGTTGATATTCTTTTTAATCGCAA  
TCATGACCTCACAACCCCAATTCGAAAACAGAGCATCTTTACCTCATTCAAGCTAGCCC  
ACTGTACTTGGTGTTCTCAGCCACTCAAAGTTATAGAATCCATAAAAAAAGTAGAGT  
TAATTACACTTTGGGCTAGGAATTTTTACCAAAGTTTCACTTTGGACGAGGATAAAGTT  
ATCTTATCAGTTTTGGACTAGATAAATTTACAAAAGTTTTAAATTTGGACCACCTTCTCT

OsWAKs-Supplemental Data 1[1].txt

CCATCAATCTTCCCTCCTTTTCTCTATTAAGCAGCCGCGCTATGGAATCTGAGGGATGAT  
CAAGCAAAGTACCAGGATTCTTCTCTCTCTGCTCTGTTCCGAGCTTGAGGAACCAGCAA  
AATCAAGACTGGTGGTAGCTGGCTGCTGTAGCTGTGCTTGAAGCTCAATACAGTGACT  
TGTTCTAAGCTCACATGATAAATTAAGGGAATAATGGTAGAAATCAAGCAGCTAAATCAA  
TGAGTAAAGAAATCAAGGTGAGGTGGAATATTGATTGGTTTATTGTGTTGCGGGTAAGCT  
CGCTAATGAAATCAAGGAGTGGCAAACAAAAAGTGGTCCAATGTGCAATAGAAGGTAAG  
AAAACCTGGACCAAAGTGAACGCTTAGATATAACCTAGTCCAAAAATAAACACAGGCAA  
TAATAACCGGGCCAAAGTGAATTCCTCACTAGGCCAAAGTGAATTCCTCAATAAA  
CTATTTGTGAGAAGTTGAGAAAGCCAACCTTCTATAGATTCTAGTTCACTAGTTGCATCTC  
ATAATTTCTGACTTCTCATGTAAGGTCTTATACTAATTCTTAATATAATCATTATGTTAT  
ATTGATGGGTCAATTTCTAATTGTGATGCATGTTTTTTTTTACTGGAATAAATTGGA  
TATTTATGTGTTTTTACGTTTTGATTCAAAAAATGTGCAATCATTTATCCTTGTTTCAA  
AGGGTAAGGGTAATGTAGGTAAAATTAGGATTCAATTTTTTCTGTAAAAAACTTTGCAT  
ATCTTAATTTTTCAAATGAGACATGTTTGACATGTGAAAACTAGTTGACTTGTCTAAC  
ATACATATAAGTCGAAATTCCTCCCTCCCAAAAAAATAAAAAAGAAGTTGATTGGGTGGAT  
TTTGTGTGCGGCCAACTATATCACTACAGGGCATGTTGCGCTGCAAGGTGCAGCTGCCGA  
ACAGGCCCCACAACCAAGAGGGCTTAGAGCCATTTCCATATGAATCACAAATGAATCT  
ATGTTGAAGACACTAATCCTAGTTCTACTATGTTAAGAAAGCTATCTGTTTTGCAGCACT  
TGTTTTAACAATATAATTGCAAACTCTCATGGGTGCTGCTGTTATTTGCAGTTTATAA  
CCCGCAATCCATCGAGTACGTAATCGTTGCTCATCAACATGCGACAACGTAGACCTTA  
AGAATGGCTCATGCTCTGGTGTGGCTGCTGCCAGGCAGATATCCGAAAGGCATACGGT  
ATTACCAAGGTTATTTCAATGCAAACTACAACCACTGCAATATGGAGGAGCAGCCCTT  
GCAACTACATGGTAGTCATGGAACCTTCAGCATTCACTTTAGTACCACTTATGTGACT  
CCACAGTATTCACTGATACGTACAAGGGGATGGTCCCACTGTCTTGATTGGACAGTTG  
AATGGAATAAATGCGAGGAAGCAAAAGAGAACTTCTACGCTTGTTAGTAGCA  
ACAGTTACTGTGCTGATGCCACCAATGGTGGGTTATCGTTGCAAGTGTCTGATGGAT  
ACAAGGGCAACCCATACATCACGGATGGATGCGAAGGTCCCTTTCCGGCCATTTTGATT  
CTCTACCCCTGCAATTAAGAGATGTAGAAAAAGTATTATTTTTAAGTCTTTTTTTGG  
CAGATATCGACGAGTGCCAAGATGCTCATCCATGCACGGGAATTTGCATAAATACGCAGG  
GGAGCTACACATGTACATGTCAACGAGGAAAACATCTGATTGACGGTGTGCAAGCAGA  
GTTCTCTTCTTGATTATACCTGTCTAGGTCCGTTACACTCTTCAGCGTCTCAAAAAA  
AAAGGAGAAATTTGACATTGACACCAATCTTGAACATAATAGCGCATTACAGTAAACCA  
ATCTGAACATATAGTAGGAATCAATCATATTATTCATGTTTATTAAATTTAAGGTTGAA  
AACCCCGGAAATGCTTTCAAATCATCTTTTGGAGTAACATCACTTTGAAACCATGCAG  
GTGGAAGTATTGGAGTTGTACCCTTGTGACTATTGTGACGTGTGCATATCTCATCCAAG  
AAAGAAATAAGCTACACAGCATAAAACAGAAGTACTTTGACAGCATGGAGGTGACTGC  
TATTTGAGGAGATGAAGGTACTGCATTTAAATCTTTACGGAAGAAGATTGCAGAAAG  
CCACTAATAATTTGATGAAAGAAAATCCTAGGTGATGGAGGACATGGCACCCTTTACA  
AGGATTTCTAAACGGCAACATGAAGTACGAATCAAAAGATGCAAGACAATCGATGAGC  
AACAAAAGAAAGAAATTTGGTAAAGAAATGGTAATCTTATCCCAAGTCAACCACAAAAATA  
TTGTCAAATATTAGTTTGTGCTTGAAGTGAAGTCCCAATATTGGTGTATGAGTTTA  
TCGCAATGGCACACTGTTCCATCTCATTCATGATGGCCACGGCAGGCACATCTCTATAT  
CCACGCGTTTACAGATTGCTCACCAGTCTGCTGAAGCATTGGCCTACCTTCACTCATGGG  
CATCGCTCCAATCTCAGGGGACGTCAAGTCATCAACATTCTCTTGATGGTGACT  
TCACGCGAAGGTCTCTGACTTTGGAGCTCCATCTTATCGCAACCGATGATGCACAGT  
TCGTACGTTTTGTGACGGGAACCTGTTGGGTACCTTGACCCAGAGTACATGCAACATGGA  
AATTAACGGATAAGAGTGATGTATACAGTTTTGGGTTGTTGCTAGAGCTACTCACGA  
GAAAGAAACCATTAATTTTACGGGCTAGAGGATGAGAAAAGCCTATCTGTGAGGTTCC  
TTTCTGCTGTCAAGGAGAAAGCTTGAGGAAATCTTGGATGATCAAATTAAGAGCGAGG  
AGAATATTGAGATTCTTGAAGAGATTGCTGAGTTGGCCAGACGATGCTTGAAATGTGTG  
GTGAGAATAGGCCATCAATGAAGGAAGTTGCAGAAAAGCTTGATAGCTTGAGAAAGGTTT  
TGCACCATCTTGGGCACTGCACAATCTTGAAGAGGCGGAGAGCTTACTAGGAGAGTCAT  
CAATTGTTAGCTCGGAGGTTGTGAGTACGGGAAATTTGAGCATTGAGAAGAAATCTTTAA  
TAGGCCTAGAATCAGGAAGATAA

>OsWAK81 gi |32970229|dbj |AK060211.1| Oryza sativa (japonica cultivar-group) cDNA  
clone: 001-002-B07, full insert sequence  
TTGTACATTGACACCAATCTTGAACATAATAGCGCATTACAGTAAACCAATCTGAACATATAGTAGGAA  
TCAATCATATTATTCATGTTTATTAAATTTAAGGTTGAAAACCCCGAAATGCTTTCAAATCATCTTT  
TGGAGTAACATCACTTTGGAACCATGCAGGTGGAAGTATTGGAGTTGTACCCTTGTGACTATTGTGAC  
GTGTGCATATCTCATCAAGAAAGAAATAAGCTACACAGCATAAAACAGAAGTACTTTGACAGCATGGA  
GGTCGATGCTATTTGAGGAGATGAAGGTACTGCTTTAAATCTTTACGGAAGAAGAAATTGCAGAAAG  
CCACTAATAATTTGATGAAAGAAAATCCTAGGTGATGGAGGACATGGCACCCTTTACAAGGGATTCT

## OsWAKs-Suppl emental Data 1[1].txt

AAACGGCAACACTGAAGTAGCAATCAAAGATGCAAGACAATCGATGAGCAACAAAAGAAAGAATTTGGT  
AAAGAAATGGTAATCTTATCCCAAGTCAACCACAAAAATATTGTCAAACATTAGGTTGTTGCCTTGAAG  
TGGAAGTCCCAATATTGGTGTATGAGTTTATCGCAAATGGCACACTGTTCCATCTCATTATGATGGCCA  
CGGCAGGCACATCTCTATATCCACGCGTTTACAGATTGCTCACCAGTCTGCTGAAGCATTTGGCCTACCT  
CACTCATGGGCATCGCTCCAATCCTCCACGGGACGTCAAGTCAATCCAACATTCTCTTGATGGTGACT  
TCACAGCGAAGGTCTCTGACTTTGGAGCCTCCATCTTATCGCCAACCGATGATGCACAGTTTCGTACGTT  
TGTGCAGGGAACCTCGTGGGTACCTTGACCCAGAGTACATGCAAACATGGAATTAACGGATAAGAGTGAT  
GTATACAGTTTTGGGGTTGTTGTCTAGAGCTACTCACGAGAAAGAAACCATTAAATTTTGACGGGCTAG  
AGGATGAGAAAAAGCCTATCTGTGAGGTTCTTTCTGTCTGACAGGAGAACAAGCTTGAGGAATCTTGGGA  
TGATCAAAATTAAGAGCGAGGAGAATATGGAGATTCTTGAAGAGATTTGCTGAGTTGGCCAGACGATGCTTG  
GAAATGTGTGGTGAGAATAGGCCATCAATGAAGGAAGTTGCAGAAAAGCTTGATAGCTTGAGAAAGGTTT  
TGCACCATCCTTGGGCACTGCACAATCTTGAAGAGGCGGAGAGCTTGCTAGGAGAGTCATCAATTGTTAG  
CTCGGAGGTTGTCAGTACGGGAAATTTCAAGATTGAGAAGAAATCTTTAATAGGCCTAGAATCAGGAAGA  
TAATCGCTAATAACCTTGTGTATATATATCCAGGAAATTATATAGGTATACTCCAAAAGTATTACAT  
GTATAGGTAATCGTCATCATATATGAATGATTCATACATGTTTTATATGTGTAGCTCAAGGTTGCATCA  
TTGTTAAGATCCAAAGGTGAGGTTGTTGTTTC

[illegible]

>OsWAK83 9637. t02576, Chromosome 9, pre-processing  
ATGGCTAAGCTTCTTCTCTCCGCTCTTTTGATCTGCATTTTCAGCCATCTGGGTGGTAGCC  
GCGGCCGACGTCCCGGCAGGACGCCGAGGCTGCCAGACGAGGTGCGGCAACCTCGACATC  
CCGTTCCCGTTTGGCATCGGCGATCAGTGGCGGATCCACGGTGGTTTCGGCCCTCGACTGC  
AAGAACGACAGCGGCACTTATAGGACATTCATGGGCGCTTCAGGTGACTAAGATCTCT  
GTGCCGGACGCCAAAGCCTGGATGAAGATGGGAATCTCTTGGCAGTGCTATGACCCGGTC  
ACAAAACAGATGAATGATTCGATGGTTGGGCAGAACTTCACCAACACGCCCTATCGATT  
TCATACGAGGATAACAAGATTTTCGTGCATCGGGTGCAATACAATGGCCTACATGAGAGGT  
GTTTCGGTAAGTATTTCTTTATTTATGTTTATGCTTTCAACCTTTTTGACGCTAAAATT  
GGAATTTTAAACAACTTGTATCTATTTTGCTTATGTTAAGTGACTATGCTTCCAGAT  
CGTTACATAAATTTCAATCTCAATTCGTAGATCAACAGATAAGCTGATTTTTTACACTAAG  
CTAATTAATTAACATCTGTGACTTAATTATGCAGTATGTCATAGGTTGCTTATCCACATG  
CTCGGATGAACCAACAAATGGTTCCTTGCTCTGGCGCTGGCTGTTGTTCCGTGGATGTCCT  
ACCAGACCTAGGCTATGTCGAGGCTTATTTCAATAAAGATTATAACACCTCTCAAATCTG  
GACTACAGCAGGTGCGGCTACCTGGTAGTAATGGAAGGCTGCTTTCAGGTATAGCAG  
CACTTACATTCCTCAATAAACTTCTGGAATGACTACAACGGGACTGTTCCGGCTGTGAT  
GGACTGGGTAATCAGAAGGGAGACATGCGAGGAAGCGAAAAGGGACATGAGTTCATATGC  
ATGTGTTAGCGACAATAGCGACTGCCATAATTCACGAATGGGCATGGTTATCTCTGCAA  
GTGCTCCAAGGGGTTTCGACGGCAATCCTTACATCAAGGATGGATGCAAAGGTCTAGCTAC  
TTCTATCCTCCACCTCCTAAATGATCGATTTGTGTATATATACACTTAAAACTTTTACTC  
AATAACATATACATTTTTGTTTTGTTTCAGATATCAACGAATGCTTGATAAATACTACTT  
ATCCATGCGCTGGACTTTGTCAAAAATACGATGGGGGGTTACGACTGTTTCATGCCATCAAG



OsWAKs-Supplemental Data 1[1].txt

GACAACATAAGGTGGAGGATGTCTGTGTTCCAGATCAGAAGAATCAGAAGTCTCTTGGG  
 AGATGCCTGTTGTAGGTATGTACGTCTAGCAAGATTAATATTTTTGCTAAGATTTACATA  
 TTGATTATCTTATTAGTGCATTAGTTGTAATATTGAGATTCATTACTTTTAAATGTTAA  
 GTGGTCATCTGTTCTGCTAGTATTGTTGTTGGCTAACAAATTATATTCGGCAACTAGGT  
 GCAAGTGTGGGTTTGTCTACTTGTATCATAGCAACTTGTTCGTACCTGATCCACGAG  
 AGAAGAAAGCTGCAACACATCAAGCAGAAATACTTTAAGTTACACGGTGGTCTACTGCTG  
 TTTCAAGAGATGAATTCAAATGAAAGGAAATCATTTACAATTTTCTCAGAAGCAGAGTTG  
 CAGCATGTACAAACAAGTTTGACAAAAACCAAATTCCTGGCCATGGAGGTCATGGCACT  
 GTTTACAAGGGACTTCTCAAGGACAACACTGAAATAGCTGTCAAGAAATGCATGACAATG  
 GATGAGCAACACAAGAAAGAATTCGGTAAAGAAATGCTAATCCTATCCCAAATAAACCAC  
 ATAAACATTGTTAACTACTGGGATGTTGCCTTGAAGTACAAGTTCCTATGCTAGTGTAC  
 GAGTTCATCCCAAATGGAACACTATGTAATCTCATCCATGGCAACCATGGCCAGAACATT  
 TCTCCAGTTACTCGTCTGCGGATCGCCCATGAGTCCGCTGAGGCACTAGCCTACCTCCAC  
 TCCTACGCTTACCACCCCATCATCCATGGTGTGTCAGTCTCCAACATCCTCCTCGAT  
 GTTAACCTTCATGGCAAAAGTCTCCGACTTTGGTGCTTCCATCTTAGCTCCAATAAACAAG  
 TCACAACCTTGTACGCTAGTCCAAGGGACTTGGGGTTATCTTGATCCAGAGTATATGCAA  
 ACATGTGAGTTAACAGATAAGAGTGACGTTTACAGCTTTGGATCTTATAGAAGTGTCTAC  
 AAGGAAGAACGTTTTCAACCTTGATGCTCCTGAAAATGAGAAAAGTTTGTCAATGAGGTT  
 TCTCTCTGCTATGAAGGAGAACAACTTGAGAATATATTAGACGATCAAATTAGCAATAA  
 CGAGAATATGGAGTTTCTTGAAGAAGTTGCGGATTTAGCAAAGCAATGCTTGGCAATGTG  
 TGGTGAGGATAGACCATCCATGAAGGAAGTTGCGGAGAAGCTCGATAGGTTGATTAAGGT  
 AATGCAACACCCATGGACGCAACAAATCCTGAAGAATTGGAGAGCTTGCTTGGAGAATC  
 TTCTTACATTATAAGCTCAGGAGCCTTGAGTACAAGAAATTTACAGCATCGAGAAGAAAGT  
 TGTCAGGACCTAGCATCAGGGCGTTAA

>OsWak83 9637. t02576, Chromosome 9, post-processing  
 ATGGCTAAGCTTCTTCTCTCCGCTCTTTTGATCTGCATTTACGCCATCTGGGTGGTAGCC  
 GCGGCCGACGTCCCGGCAGGACGCCGAGGCTGCCAGACGAGGTGCGGCAACCTCGACATC  
 CCGTTCCCGTTTGGCATCGGCGATCAGTGCAGGATCCACGGTGGTTTGGCCTCGACTGC  
 AAGAACGACAGCGGCACTTATAGGACATTCATTGGGCCGTTTCGAGGTGACTAAGATCTCT  
 GTGCCGGACGCCAAAGCCTGGATGAAGATGGGAATCTCTTGGCAGTGCTATGACCCGGTC  
 ACAAACAGATGAATGATTGATGTTGGGCGAGAATTCACCAACACGCCCTATCGATTCT  
 TCATACGAGGATAACAAGATTTTCGTATCGGGTGCAATACAATGGCCTACATGAGAGGT  
 GTTTCGTATGTCATAGGTTGCTTATCCACATGCTCGGATGAACCAACAAATGGTTCTTGC  
 TCTGGCGCTGGCTGTTGTTCCGGTGGATGTCCACCAGACCTAGGCTATGTGAGGCTTAT  
 TTCAATAAAGATTATAACACCTCTCAAATCTGGAACCTACAGCAGGTGCGGCTACCTGGTA  
 GTAATGGAAGAGGCTGCTTTCAGGTATAGCACCCTTACATTCCCTCAATAAACTTCTGG  
 AATGACTACAACGGGACTTTCGGCTGTGATGGACTGGGTAATCAGAAGGGAGACATGC  
 GAGGAAGCGAAAGGGACATGAGTTTCATATGCATGTGTTAGCGACAATAGCGACTGCCAT  
 AATTCAACGAATGGGCATGTTTATCTCTGCAAGTGCTCCAAGGGGTTTCGACGGCAATCCT  
 TACATCAAGGATGGATGCAAGATATCAACGAATGTCTTGATAATACTACTTATCCATGC  
 GCTGGACTTTGTCAAAATACGATGGGGGGTACGACTGTTTCATGCCATCAAGGACAACAT  
 AAGGTGGAGGATGTCTGTGTTCCAGATCAGAAGAATCAGAAGTCTCTTGGGAGATGCCT  
 GTTGTAGGTGCAAGTGTGGGTTTGTCTACTTGTATCATAGCAACTTGTTCGTACCTG  
 ATCCACAGAGAGAAGAAAGCTGCAACACATCAAGCAGAAATACTTTAAGTTACACGGTGGT  
 CTACTGCTGTTTCAAGAGATGAATTCAAATGAAAGGAAATCATTTACAATTTTCTCAGAA  
 GCAGAGTTGCAGCATGTACAAACAAGTTTGACAAAAACCAAATTCCTGGCCATGGAGGT  
 CATGGCACTGTTTACAAGGGACTTCTCAAGGACAACACTGAAATAGCTGTCAAGAAATGC  
 ATGACAATGGATGAGCAACACAAGAAAGAATTCGGTAAAGAAATGCTAATCCTATCCCAA  
 ATAAACACATAAACATTGTTAACTACTGGGATGTTGCCTTGAAGTACAAGTTCCTATG  
 CTAGTGTACGAGTTTCATCCCAAATGGAACACTATGTAATCTCATCCATGGCAACCATGGC  
 CAGAACATTTCTCCAGTTACTCGTCTGCGGATCGCCCATGAGTCCGCTGAGGCACTAGCC  
 TACCTCCACTCCTACGTTTACCACCCATCATCCATGGTGTGTCAGTCTCCAACATC  
 CTCCTCGATGTTAACTTCATGGCAAAAGTCTCCGACTTTGGTGCTTCCATCTTAGCTCCA  
 ATAAACAAGTCACAACCTTGTACGCTAGTCCAAGGGACTTGGGGTTATCTTGATCCAGAG  
 TATATGCAAAACATCTTGGATCTTATAGAAGTGTCAAGGAAGAAGCTTTTCAACCTT  
 GATGCTCCTGAAAATGAGAAAAGTTTGTCAATGAGGTTTCTCTCTGCTATGAAGGAGAAC  
 AAATTTGAGAATATATTAGACGATCAAATTAGCAATAACGAGAATATGGAGTTTCTTGAA  
 GAAGTTGCGGATTTAGCAAAGCAATGCTTGGCAATGTGTGGTGAGGATAGACCATCCATG  
 AAGGAAGTTGCGGAGAAGCTCGATAGGTTGATTAAGGTAATGCAACACCCATGGACGCAA  
 CAAAATCCTGAAGAATTGGAGAGCTTGCTTGGAGAATCTTCTTACATTATAAGCTCAGGA  
 GCCTTGAGTACAAGAAATTTACAGCATCGAGAAGAAAGTTGTCAAGGACCTAGCATCAGGG  
 CGTTAA

>OsWAK84 9637.t02578, Chromosome 9, pre-processing  
 ATGGCGGTGATGGAGGATAAGGCCTTCCAATTTAGCACCACTTACCTCAACTCCACGGTA  
 TTCAACGACACGTACAAAGAGGGAGTTCCAGTTGTGTTGGACTGGGTCATAACATTGGAT  
 ACATGTGAGAAGGCTAAAAGCAAAACCACTTCTACGCTTGTGTTAGTACAAACAGCATC  
 TGCAATGATGATCCGAGTGGAGGTTACCGTTGTAATTGTTACATGGATATGAAGGAAAC  
 CCGTATATTTAAAGATGGTTGTGAAGGTACCATAGTTACTTTTTCGTTATTCTTCTTCTT  
 GATATGACAATTTCAATCAAACCTTGCAATGGTTGCTTGATTTAGATATCAATGAGTGCC  
 TCGACAATGTTACTTATCCTTGTCCGGGGATATGCAATAATACAATGGGGAGTTTCACTT  
 GCTCATGCCACCAAGGAACTATATGGAGAATGGCACTTGCATACCAAATCGGAAGTCCG  
 GTTTTCTTGCACTTCTATAGTAGGTTGGTTCCCTCTTCCGTAATCACTAGAACTAATG  
 ATAACGCCAACCAATTTGTGCACACCAATATGAGAATTGTTAATATATAAATTTTGCATGC  
 CTTACTAGTCATTACACATGGCTAGCTCATGGATCTTCCATAATTCCATATCTTAGGCCA  
 ATCCCAACCCAACACACTAGACATAGTTTCCATAAACTCCACATCATAAAAAAACTAGT  
 ACAAGACACTGCTCTTTCAATGCAAACACCAATTGTTTCATACTTAGATTTAATGCTACTT  
 ATCTCATATGATGCTTGGATGTTGTGTA AAAACCATGCATGTCTCATGCAAGACCTGGT  
 TTCCTTTCTTCTCCTCATTTATTCACCTGCCACATCATCTTTCATCCTAGGTGGTAGCTT  
 ATTTAATGCTATAGACACCACTTAGTCATTGGGTTGGGACTGGCCTTACTAGTCATTCA  
 CACAAGCTTTTATGATTGTGTAGGCACAAGTGTGGACTTGTATCCTAGTGATCACCAT  
 AACTTGTGCATGCTTAATTCATGATAGAAGAAAGCTACAGCACATCAAAAATCAATACTT  
 TCGACGGCATGGTGGCCTGCTACTATATGAAGAGATGAAATCTAACAAGGTCTTGCATT  
 CAAAATCTTCTCGGAAGAAGAATTGCAACAGGCGACAAACAAATTTGATGAACATCAAGT  
 TCTAGGCCAAGGAGGCAATGGAATTGTTTACAAGGGACATCTTAAGGACAACCTTGAAGT  
 AGCAGTAAAAAGATGCATGACAATTGATGAGCAAAAAGAAAAAGAGTTTGGCAAAGAAAT  
 GCTAATTTTATCCCAAATCAACCACAAAAACATTGTTAAACTATTAGGTTGTTGCCCTGA  
 AGTGGAGGTCCCTATATTGGTCTATGAATTCATCCCAAATGACACACTTTACCATCTCAT  
 CCATGGAACTATAATGGTTGGCACATCCCTCTGGTTACTCGCCTACGGATTGCCCATGA  
 GTCTGCTGAGGCATTTGCCTACCTCCACTCTTGTGCTTCCCCACCAATCCTCCATGGTGA  
 CGTCAAGTCGTGCAACATCCTCCTTGATAGCAACCTCTCAGCAAAAGTTTCAGATTTTGG  
 TGCATCTATCCTAGCTCCAACAGATGAGACGCAATTTGTACACTAGTTCAAGGAACCTG  
 TGGATACCTTGACCCAGAGTACATGCAAACGTGCCAATTAACAGATAAGAGTGATGTATA  
 TAGCTTTGGAGTTGTTCTTCTAGAACTTCTTACACGCAAGAAGCCGTTCAATCTTGATGC  
 GCTTGA AAATGAGAAATGCCTGTCTATGAGGTTTCTCTCTGCAATGAAGGAGAATAAGCT  
 CAGTGATCTATTGGATGATCAAATCAAGAATAATGAGAATATGGGGTTTCTTGAAGAGAT  
 TGCCGAGTTAGCAAGACAATGCTTGGAGATGTCCGGTGTAGATAGGCCATCAATGAAGGA  
 AGTAAGAGATAAGCTTGATAGGCTGAGGAAAGTCATCGAGCATCCATGGACACACGATAA  
 CCCAGAGAATTGGAGAGCTTGCTTGGTGAGTCATGTGTGGTCATCTCAGAGGTTGA  
 GAGTACAGGAAATTTTAGCATTGAAAGGAAAGTTGTCAAGGGTTTGAATCAGGGCGTTA  
 A

>OsWAK84 gi|37988919|dbj|AK119296.1| Oryza sativa (japonica cultivar-group) cDNA  
 clone: 001-130-E06, full insert sequence  
 ACGGGCACAACCAACAAAGATGAAGTTGCAGTATACACGGGCAGTTCTTGCCAGCCTTTTTTGTGTCTGT  
 CTGTGGGCTGTCTGGGTGGCGGCAGCAACGGCCGATATACCGGCAGGGCAACGCCCGGTTGCCCGGAGA  
 GGTGTGGCGACGTCGAGATCCCGTTCCCGTTCCGCATCGGCAAGCACTGCGCGATGCAGACGAAGTATCC  
 GTTTGATCTCGACTGCTTGGACGTGAATGGCACCAAGAAGCCTTTCTACAACAATAACGAGGTTACCAAG  
 ATTTCCGGTCAGGAGGGCAAGGCATGGATGAAGTTGGGCATATCCAGTCAGCGTTATGACCACGTGACAG  
 GCCATATCCTGTACGACAGCAACGCAACGGCAGAATTCGGTGATTACCTTTCTGGCTATCGACCGAAAA  
 CAAGATCATCGTCATCGGATGTCAAACATATGGCTTATATGGAGAGCAACGCTTACGTAATTGGTTGCTTC  
 TCGACATGTAATGGTTCAACACCTGTGAATGGATCTTGCTCCGGCGGTGGCTGTTGCCAGATGGATGTTT  
 CAGGACACATATATAGTTATGATGGTTATTTTGACGAAGATTACAATGATAGCAAAATATGGAGGAGCAG  
 CCCTTGACAGCTACATGGCGGTGATGGAGGATAAGGCCTTCCAATTTAGCACCACTTACCTCAACTCCACG  
 GTATTCATCGACACGTACAAAGAGGGAGTTCCAGTTGTGTTGGACTGGGTCATAACATTGGATACATGTG  
 AGAAGGCTAAAAGCAAAACCACTTCTACGCTTGTGTTAGTACAAACAGCATCTGCAATGATGATCCGAG  
 TGGAGGTTACCGTTGTAATTGTTACATGGATATGAAGGAAACCCGTATATTAAGATGGTTGTGAAGAT  
 ATCAATGAGTGCCTCGACAATGTTACTTATCCTTGTCCGGGGATATGCAATAATACAATGGGGAGTTTCA  
 CTTGCTCATGCCACCAAGGAACTATATGGAGAATGGCACTTGCATACCAAATCGGAAGTCCGGTTTTCT  
 TGCATTTCTATAGTAGGTTGGTTCCCTCTTCCGTAATCACTAGAACTAATGATAACGCCAACCACTTTG  
 TGCACCAATATGAGAATTTGTTAATATATAAATTTTGCATGCCTTACTAGTCATTACACATGGCTAGCT  
 CATGGATCTTCCATAATTTCCATCTTAGGCCAATCCCAACCCAACACACTAGACATAGTTTCCATAAAC  
 TCCACATCATAAAAAAACTAGTACAAGACACTGCTCTTTCAATGCAAACACCACTTGTTCATACTTAGA

OsWAKs-Supplemental Data 1[1].txt

TTTAATGCTACTTATCTCATATGATGTCTTGGATGTTGTGTAAAAACCATGCATGTCTCATGCAAGACCT  
GGTTTCCTTTTCTTCTCATTATTTACTTGGCACATCATCTTTCATCCTAGGTGGTAGCTTATTTAAT  
GCTATAGACACCATTCTAGTCATTGGGTTGGGACTGGCCTTACTAGTCATTACACAAGCTTTTATGATT  
GTGTAGGCACAAGTGTGGACTTGTCTCCTAGTGATCACCATAAATTGTGCATGCTTAATTCATGATTG  
AAGAAAGCTACAGCACATCAAAAATCAATACTTTGACGGCATGGTGGCCTGCTACTATATGAAGAGATG  
AAATCTAAACAAGGTCTTGCAATCAAAATCTTCTCGGAAGAAGAATTGCAACAGGCGACAAACAAATTTG  
ATGAACATCAAGTTCTAGGCCAAGGAGGCAATGGAATTGTTTACAAGGGACATCTTAAGGACAACCTTGA  
AGTAGCAGTAAAAAGATGCATGACAATTGATGAGCAAAAAGAAAAAGAGTTTGGCAAAGAAATGCTAATT  
TTATCCCAAATCAACCACAAAAACATTGTTAACTATTAGGTTGTTGCCTTGAAGTGGAGGTCCCTATAT  
TGGTCTATGAATTCATCCCAAATGACACACTTTACCATCTCATCCATGGAACTATAATGGTTGGCACAT  
CCCTCTGGTTACTCGCCTACGGATTGCCCATGAGTCTGCTGAGGCACTTGCCTACCTCCACTCTTGTGCT  
TCCCCACCAATCCTCCATGGTGACGTCAAGTCGTGCAACATCCTCCTTGATAGCAACCTCTCAGCAAAAG  
TTTCAGATTTTGGTGCATCTATCCTAGCTCCAACAGATGAGACGCAATTTGTACACTAGTTCAAGGAAC  
TTGTGGATACCTTGACCCAGAGTACATGCAACGTGCCAATTAACAGATAAGAGTGATGTATATAGCTTT  
GGAGTTGTTCTTCTAGAACCTTCTACACGCAAGAAGCCGTTCAATCTTGATGCGCTTGAAAAATGAGAAAT  
GCCTGTCTATGAGGTTTCTCTCTGCAATGAAGGAGAATAAGCTCAGTGATCTATTGGATGATCAAATCAA  
GAATAATGAGAATATGGGGTTTCTGAAGAGATTGCCGAGTTAGCAAGACAATGCTTGGAGATGTCCGGT  
GTAGATAGGCCATCAATGAAGGAAGTAAGAGATAAGCTTGATAGGCTGAGGAAAGTCATCGAGCATCCAT  
GGACACACGATAACCCAGAAGAATTGGAGAGCTTGCTTGGTGAGTCATCATGTGTGGTCACTCTCAGAGGT  
TGAGAGTACAGGAAATTTAGCATTGAAAGGAAAGTTGTCAAGGGTTTGAATCAGGGCGTTAAGCAGTA  
CTCTCTCGGTATAGCTTATGTCCAATCCTATTGTGATTTATCATAGATTCTTGTAGAGCCAAGGAAC  
CTTACTCATCTATGTCAATTATTTGTGTAAAGTTGAGATCTTGTGAAGGCAAGGTAATTGTATCTGTTAG  
AATATCCTCCTGGTATCACTACTCTTGGTAGATTGGGATTCAAACATGTATTAACCTTTAAGACAGATCA  
TTCATCTCTCTTGTAGATGAAAAGGAAAGTTATACAATAGAGTGTCAAATTTAAG

>OsWAK85 9637. t02580, Chromosome 9, pre-processing  
ATGACCAAGCTTCTCCACTCCGCCTGCCTTCTCATCTGCATTTCAAGGCGCCATCGGGTTG  
GCCGCGGCTGCTGCCGGACACCCAGGCTGCCAGACGAGGTGCGGGGACGTGACATCCCG  
TTCCCCTTCGGCATCGGCGATCACTGCGCGATTACGAGGGTTTTCGGCTCGAGTGCGAC  
AACGCCACGAAAGGCACCAGCAATCAGAAGCCTTTCTGGGGGGACTTCGAGGTGATCAAG  
ATCTCCATGGAAGACGGCAAGGTCTGGGTGAAGGCGTACATGTCCAGGCAGTGCTACGAC  
CAATCCACGGGCGGTATGTACACAGCGACGCATCGGCGAATTTGAGTGGTTTCATCTTTC  
TGGTTATCGGACACGGATAACAAAATTAACCGTGATCGGATGCAAGACTCTCGCCTACATG  
ACGACCGATTCTGTAAGTACTATTTAGTATAATTTAGTAAATCTGATTTTACAAAAGTT  
GTAAAAATGAGTCACCTTATTTTTATTTTACTTTTTAGAACTAGAAAAAAATACCC  
GTGTGTTGCAACGGGTGAAAATATTTAATCATATTATTGTTAGATTTTTTAAACAAT  
ATATGGGATTTTTATTTGATAGTATTGATATCTAATTTGGAACTTTTATTAGAATGATG  
GCTATATCCTACGTTGTTATTTTTATGCTTTAGCAAGAATTCTAAAGCAATTAGAAGTC  
CAACTCTCGTCCCAAGTTAATATGCGAGTTTTTAAAAAGATTTTTATACGACTCTTTAT  
GTACTTTTAAAAGTGAATGAACCTAGAGCATACCAACAGTCTATCTATCTGATTTTCAA  
AACTGATTTGGAGGGATTTTAAATAAAAAAATAGCTCCAACAGATCCCCTACTCACCTAC  
CCAAGTTTTGGAGTTCTCTTCTCCCGATTCTCGCTCCGTTTATATGCGGATGCGTGTT  
TCGCAAAAGTCGCTCCCAATCTCGCACTCCCGCATCTCTCTCCGTTCCCGCGTGTGGG  
AGATAGCGATCTTTTTGCGATGGAAGAAAAATAGAATTTTTTGTAGTATTTAACAAA  
AGGGTCCATTTTAAGTTTTAGGGATTTAATTTAGGCTATCTGTTAGAGGGAGGAGTTTTT  
TCACTTCTATTTTCACTTTAGGAAACCCAAAAACAATTTTTGGAGGGAAGATTATAGAT  
AATCTGTTGGTGATGCTCTTAAAACTGACTCAAATACGAACAATGCACCAAATGTCAA  
CAAAAATATTTTCAATTTTTATAATAGTAGAGATAGAGATTTATAGATGTCCATAAGGGG  
TGGACCAAGGTTTCTCATAAGACCTGGACCAGCTTATGGGCATGTTTGGGGGAGTTTCTA  
GCTGTTGCAGCTTCTCTAGAATCAGAAGTCCCCCAAACAGTCCAGCTTTTGGTCCAG  
ATTTTGAGAAGCTGTAGTTGTAGAATCTATAAAATGAAGTGAAGCCAGCTTGCTACCAA  
CCAGCTGCTTCTCAGAATCTTAAGCTCCCAAAGCAGGCCATGTCTCTTGGTCTAAGAT  
TAGAGTTGAAATATTACGGTGTGTTTGTGGTCCGTCCCTGCGTCCATAGATTGATTGGGA  
ATAGATATTATTATCCCATTTGCTTATGTTCTTTTCTCCAATAAAAGTTGGATAAACTTT  
TGGATACTCGTGGCATGTTTTTCAAATTGCTAAACGGTGCCTTTTGTGTGAAAATTTTCT  
ATATGAAGTTGTTCTAAAAATATAAGATTAACTATTTTTTCAAGTTTGAATAATTTAAA  
ACTCAATTAATCACACGTTATTACCACCTGATTTTGCCTTAAACACTTAATCTTAATCTT  
TATCTTCATCTTCAGGAGATTCAAACACGCTAGTTGTGTCCCTAGTTGCAGTCGAATACT  
ACACCTAAGTGCCTGAAGCATGATATTAATAAATTTATAACATATGTAAGTTTATGATA  
CTCCATATTTAATATTATTAGAATTTTCAAGGAAAAATCTACATATATTATTTCTTTTCT  
TCTTCTCTACTATTATAAAAAATGAAGATGTTTTTGTGCGTACTTTTGTACGTCATCCGT  
GTATGAGTCGGTTTTTAAGTTTTATTCGCTTTTTGGAATATATATTTGTATTTGAGTCAGT  
TTTTAAGTTCGTTTACTTTTGGAAATACATAAGGAGTCGTATAAGAAATCTCTTTAAAAA

OsWAKs-Supplemental Data 1[1].txt

AACTCGTATGTTATTTTGAGATGATTGGACTCTTAATTGCAGTTCATGGTTTCATAAAAA  
GCTATATATTCACGCGAATTCCTCATAGTGAATTTTATCTTAACCTAAACCGTATAACAATA  
ATAAGATTAAAAATAACCTTCACCCGTTGCAACACACGTGTATTTTTCTAGTAAATTA  
ACATTTGAGAAATTATTGATAATCAAAGTTTCGAAGGTCTGATCAGATCTCATCTTAGCT  
AAATGTCAAATATTTATAATAAGAGGAAAAGTAAAAATTAAGAACGATCCGGTTTTTCAC  
ATGCATTTCAATAATGTGCGGTTATTGCATCAATTGCCATTGTTGTTGCTTCTACAGTC  
AACTATTAGCTATTAGGTTGGGTGGGATAAAATTTACAACTTTGATATAAGTTTATAGA  
AAAAATATATTTATAATATATACCAAATAAATACACTATTAAGACATATTTTTTATGGATT  
TAATAAAAACTAAATTGATGTTGTAGATGTGGTGCACTTTTCTTATGTTTAAAGTTAGAA  
AATTTTGACTTTGAATATAAACTAAACAACCTTAGAATATGTAACAGGAACAGAGAGAG  
TAATTTGTTAATCATGAAAAAAATATTTGTTGCTTTTTTTAACGAACCTGGTAAAGATG  
TGCCAATTTTATTGAATATAGAAGTAAAGTTACAATTACAAGAATAAAAAAGAAGCTGTA  
AAAAAGGGCAAGGTCTAAGGAATTAAGCGCAAGGTGTAAAGAATTGTACAAATTTTCAT  
TGAATATTCGTTGCTTTTGATCTTCACTAAATAGCTTTCTGCATCCATATGTAACAAAT  
GCAGTATGTAATCGGGTGTTCGTGAGCATGCGACAACAAAGTGAACAACTAACTCCCAA  
GAATGGTTCATGCTCTGGCGCTGGCTGCTGCCAGGCAAATGTTCTAAGAGCATACAGTA  
CTACCAGGGTTATTTCAACGAAGGCTACAACACCACTAAAATATGGATGAGCAGCCCTTG  
CAGCTACATGGCAGTGATGGAACCGCAGCATTCAACTTTAGCACAAAGTTACCTCACATC  
CAGCGTATTTTATGACACGTACAAGGGGGGAGTTCCGGTTGTCTACGACTGGGCCATAAC  
ATCAAAAACATGTACAGAATCTAGAAGAAACAAGACTTCTACGCATGTATTAGTAACAA  
CAGTCAGTGCAATTGACAACCTGACGAATGCACAAGGTTACCGCTGCAAGTGCTCCAATGG  
ATATGAAGGCAACCCGTACATAAAGGATGGTTGCAAAGGTACTGTGTTGCACCTTTAATT  
TTGTGTCTGCTGCTTATGTACACTTGTATGTAATGTGACAATTCTGACCCAATGTGGTGG  
TTTCGATTTTCAAGATATTGATGAGTGCCTCAACAATGCTACTTACCCTTGCAAGGGGATATG  
CACCAACACGTTGGGGAATTTACCTGCTCATGCTCCCCAGGAAGTTATATGATGAATGG  
AGATTGTATGCCAAGAAGAACTACGTTTTGACTCAGTGCCTGTGGTAGTAGGTGAGCT  
CCTATATTTCTGTAAGAAGTACTACCATGTCTATGGATCACCAGTTTAAATACTGCGTAGT  
GTGTAGTCATACCATACAATATGACAATCCAACACTTCTCCCTCTAAACAACACCAGAGC  
TTTTCTGAAATAAGTAATAATTAATAAAAAAACTTGTGTTGGCCAAATTTTGTGTAGTCGC  
GTTGGCCAACAAGACACAACCTCTAGCACCTTTCTTCATTGCGACATTGCAGGGATAGCCT  
TAAATCTGCTCAGTATTGGTCCATAGAAAAAAATGTAATTGCTGGCTAGGTGATGGAA  
TTTCATCCATATCATTTTCCAACAACGTGCAGGCGCAAGTATCATATCTGTTGTCCTGGT  
GATTACCATAATGTGTGCTTACTTGATCAAAGAGAGAAGAAAGCAACAGCTCATCAAACA  
ACATTACTTCCGACAGCATGGTGGTCTGCTGTTATTTGAAGAGATGAAATCGCAATAAGG  
TGTTGCATTCAAATCTTCTCACATGAAGAATTACAGGAAGCAACAATAGGTTCAATGA  
ACAACAGATTCTTGGGCAAGGAGGCCATGGAAGTGTACAAGGGGCTTCTGAAGGGCAA  
CATGGAAGTAGCTGTCAAAGATGCATGACAATCAATGAGCATCAGAAGAAAGAATTTGG  
TAAAGAAATGTAATTTTATCTCAAATCAACCAAAAAATATTGTCAAATATTAGGTTG  
TTGTCTTGAAGTAGAGGTCCTATGCTAGTATACGAGTTTATCCCGAACGGCACGCTTTT  
CGATCTCATCCATGGTAACCATGGTCAGCAGATCTCCCTGGCCACTCGTCTTCAGATTGC  
CCATGAGTCAGCTGAGGCATTTACTTATCTCCATTATGTGCTTCACCACCAATCCTTCA  
TGGTGACATCAAATCATCCAACATCCTCCTTGATAGAAACCTGATAGCAAAGGTTTCAGA  
TTTTGGTGCTTCCATTCTAGCACCAACAGATGAGTCACAGTTTGTCACTGGTTCAAGG  
AAGTTGTGGATATCTTGACCCAGAGTACATGCAGTTGTGTCAATTAACAGATAAGAGTGA  
CGTATATAGCTTCGGAGTTGTTCTCGTAGAGCTTCTCACATGCCAGAAAGCGTTCAACCT  
CAATGCACCTGAACATGAGAAAAGCCTATCGATGAGGTTTCTCAATGCAATGAAGAATAA  
CAAGCTTGCAGATATATTAGATGACCAGATCAAGAATAGTGAGAATATGCCATTTCTCGA  
AGAGATTGCAGAGTTGGCAGCACAAATGCTTGGAGATGTCTGGTGTGAATAGGCCATCAAT  
GAAGCACATTGCAGATAATCTTGACAGGCTGAGAAAGGTTATGCAACATCCATGGGCAGA  
ACAGAATTCGACAGAGTTGGAGATTTGCTTGGAGAATCGTCCATGGTCAGCTCAAGGTA  
TACCAGTACAGAAATTTTACAGATAGAGAGAAAAGGTGTCATGGAGCTAGATTACGGGAG  
GTAG

>OsWAK85 gi|32981383|dbj|AK071360.1| Oryza sativa (japonica cultivar-group) cDNA  
clone: J023090B05, full insert sequence  
GGCAGCATCACGTAAGTCAAGATTCAGAAACACACAAACCAAGAGAGAATTAACCAAATGACCAAGC  
TTCTCCACTCCGCTGCCTTCTCATCTGCATTTTCAGGCGCCATCGGGTTGGCCGCGGCTGCTGCCGGACA  
CCCAGGCTGCCAGACGAGGTGCGGGGACGTGCAGATCCCGTTCCCTTCGGCATCGGCGATCACTGCGCG  
ATTCACGAGGGTTTTCGGCTCGAGTGCAGACAACGCCACGAAAGGCACCAGCAATCAGAAGCCTTTCTGGG  
GGGACTTCGAGGTGATCAAGATCTCCATGGAAGACGGCAAGGTCTGGGTGAAGGCGTACATGTCCAGGCA  
GTGCTACGACCAATCCACGGGCGGTATGTCTACAGCGACGCATCGGCGAATTTGAGTGGTTTCATCTTTC  
TGGTATTCGACACGAGTGAACAAATACCGTATCGGATGCAAGACTCTCGCCTACATGACGACCGATT  
CTTATGTAATCGGGTGTTCGTAGCATGCGACAACAAAGTGAACAACTAACTCCCAAGAATGGTTCATGC

OsWAKs-Supplemental Data 1[1].txt

TCTGGCGCTGGCTGCTGCCAGGCAAATGTTCTTAAGAGCATACAGTACTACCAGGGTTATTTCAACGAAG  
GCTACAACACCACTAAAATATGGATGAGCAGCCCTTGACGTACATGGCAGTGATGGAAACCGCAGCATT  
CAACTTTAGCACAAAGTTACCTCACATCCAGCGTATTTTATGACACGTACAAGGGGGGAGTTCCGGTTGTC  
TACGACTGGGCCATAACATCAAAAACATGTACAGAATCTAGAAGAAACAAGACTTCTACGCATGTATTA  
GTAACAACAGTCAGTGCATTGACAACCTGACGAATGCACAAGGTTACCGCTGCAAGTGCTCCAATGGATA  
TGAAGGCAACCCGTACATAAAGGATGGTTGCAAAGATATTGATGAGTGCCTCAACAATGCTACTTACCCT  
TGCAAGGGGATATGCACCAACACGTTGGGGAATTTACCTGCTCATGCTCCCCAGGAAGTTATATGATGA  
ATGGAGATTGTATGCCAAAGAAGAACTACGTTTTGACTCAGTGCCTGTGGTAGTAGGCGCAAGTATCAT  
ATCTGTTTGTCTGGTGATTACCATAATGTGTGCTTACTTGATCAAAGAGAGAAGAAAGCAACAGCTCATC  
AAACAACATTACTTCCGACAGCATGGTGGTCTGCTGTTATTTGAAGAGATGAAATCGCAATAAGGTGTTG  
CATTCAAAATCTTCTCACATGAAGAATTACAGGAAGCAACAAATAGGTTCAATGAACAACAGATTCTTGG  
GCAAGGAGGCCATGGAAGTGTTCACAAGGGGCTTCTGAAGGGCAACATGGAAGTAGCTGTCAAAAGATGC  
ATGACAATCAATGAGCATCAGAAGAAAGAATTTGGTAAAGAAATGCTAATTTTATCTCAAATCAACCACA  
AAAATATTGTCAAATATTAGGTTGTTGCTTGAAGTAGAGTCCCTATGCTAGTATACGAGTTTATCCC  
GAACGGCACGCTTTTCGATCTCATCCATGGTAACCATGGTCAGCAGATCTCCCTGGCCACTCGTCTTCAG  
ATTGCCCATGAGTCAGCTGAGGCACTTACTTATCTCCATTATGTGCTTACCACCAATCCTTCATGGTG  
ACATCAAATCATCCAACATCCTCCTTGATAGAAACCTGATAGCAAAGGTTTCAGATTTTGGTGCTTCCAT  
TCTAGCACCAACAGATGAGTCACAGTTTGTACACTGGTTCAAGGAACCTGTGGATATCTTGACCCAGAG  
TACATGCAGTTGTGTCAATTAACAGATAAGAGTGACGTATATAGCTTCGGAGTTGTTCTCGTAGAGCTTC  
TCACATGCCAGAAAGCGTTCAACCTCAATGCACCTGAACATGAGAAAAGCCTATCGATGAGGTTTCTCAA  
TGCAATGAAGAATAACAAGCTTGAGATATATTAGATGACCAGATCAAGAATAGTGAGAATATGCCATTT  
CTCGAAGAGATTGAGAGTTGGCAGCACAATGCTTGGAGATGTCTGGTGTGAATAGGCCATCAATGAAGC  
ACATTGCAGATAATCTTGACAGGCTGAGAAAGGTTATGCAACATCCATGGGCAGAACAGAATTCAGAAGA  
GTTGGAGAGTTTGTGTTGAGAAATCGTCCATGGTCAGCTCAAGGTATACCAGTACAGGAAATTTTCAGCATA  
GAGAGAAAAGGTGTCATGGAGCTAGATTACGGGAGGTAGTAGCTATACTTTTTTTTTTCAAATCTTGGTG  
GGCAATGTGAGTATTATCTACTTAAATAATCATATCACAGATCTTATTACAGTAAATATGCAATATCAT  
ATTGTTGGCAAATTAATTGCAATTGTATGTAGGACAACAAAGTAATGTTGGCGGCTGCTCAAGGAATACC  
CTC

>OsWAK86 9637. t01417, Chromosome 9, pre-processing  
ATGCCAGGAAACTATGTCGTCGTCGTCCTTAGCAGCCTGGCTGCACTAGTGCTGCTG  
CTGCCCGCGTTGTTTGTCTGCTGTGGATGATGGGATGAGGAGCGGCGGCAAGTGACCAAC  
AGCTGCGGCAACGTGCGCTTCGAGTACCCGTTTCGGCGTGGAGGACGGGTGCTACCGCGGC  
GGCGGCTTCAACCTCACCTGCAACCACACGTACCAGTCGCCCAGGCTGTTCTCGGCGAT  
GGCAGCGTGCAAGTGCTCGACATCTCCGTGCCACACGGGTGGGCGCTGATCAACAACACC  
GGCATGGTGTTCAACTCCACCGAGACGCGGGTCTGCTCCTCAACAGAACATGGGATCAGCTG  
GTGGGAGGCCCTACTCCTTATCGGGCTCAAACAAGATAGCTCTGGTAGGCTGCAATGCC  
AGGTTGATCTTCGCGCCCGGTTAAAGTAAACACGGCGGCGGCGGCGGCGACGACGAT  
ACTGGAAGTAATCTGATCAGCTCATGCATGCGCTGCTGCCATTAGACCTCGAGGACATG  
ACTCCGGTTTTCGCCATCGGTTCTGGCGGTAGCAGCGCAGCGTCTCGGGGTTGGCTGC  
TGCCAAGCAGACATCAACTTAGACATCCCCTCTTCGTACACAATCCAGATCCACAATTG  
CAGGAGCTGGGAGGCTCCATCAGTCCAACGGATCTAGTGTTTATATCGAAAGAGGAGTTC  
AGCTACACCAATGACATGGCTTTCGGCAACAACATCCCACAGGCGCTCCCAGCCCTGCTA  
GATTGGTATATAAGCAGTGACCCATCAGAGTGACGTACGAATCAGCCCCGATTGTCTC  
AGCGCCAACAGCTTCTGCCACGCTTACGACCTTGGGTACAAGTGCCACTGCTCCGATGGT  
TACCAAGGAAATCCATACATTGCGGGTGGATGCCATGGTAAGTACTAGTACTAGTAATTA  
ATAGGAGTAATAGTTTGCATGCCGCTTTATATATACTACTTATTAATGTCTTTTTGTTAC  
TAGATATCGATGAATGCAAGTCCCCCAAGATTATTCATGTTACGGCAACTGCAACAACA  
CGCCAGGATCGCACATTTGCGACTGTCTCGTGGCTACGAGCGCAATGCTTCCACACCAA  
ATGGATGCAAAGGTACCTAATTAATGGATTAACCTCTCGTTTATCGGATTAATAATACATA  
TATATGTATATAATAAATTAAGTACTAGCCAGTACTACAACGGTTTATATCTAATTACTATTA  
CAAATTTGTTACTAGTACGTACTGTAGCTAGCTAGCCATCTATCAATTAATTGCTTAATT  
TACGCTGACACATGTTGATCGTTGCAGCACGTGTGTTGCTCAATTAGTATATGTCAATA  
AATTGAGGTTGTTAATTTTCACTACTAGCTACCCCTGCAGTGTTGAAACAAGAAATAGCGC  
GTACATAGCAAAAATAATTAAGTTCTCCCTGGTGTGCTATTATTATTTGAGGGGAG  
CACACGGTAAATTTCCCATGTACGTTTTTCTATGTTGATCCACACTGAAAGCTACTC  
CGTCAATTCTAACATTTTCCATGTTTATATTGTTGTTAATGAATTTAGACATATATATCTA  
TCTAGATTCAATTAAGATCAATATGAATGTGGAATGCTAGAATGACTTACATTGTGAAA  
TGGAGGAAGTAGCTAGCTTGTGGGAAATTAATTACTGCGTGTTCGGCAATATAGGCAC  
CCGCGGTGTTTTTACATATTATTAATTATCCCTAATTTACACAGCTCACAACAAGAAAA  
GCAAATTAATAATAGGAAATACATATACTTTCTAGCATGTGATCTTATTGATCTTTC  
CATGCTGTATACAATTAACAGACATCGATGAGTGTTGGGCACCGCGAAACTTACCAGTGC  
TATGGAGAGTGCAATTAATTTCCCTGGAGGTTTCGATTGCCTCTGCTACCATGGAAGTAC

OsWAKs-Supplemental Data 1[1].txt

GGGGATCCCAGAAAAGAAGGGGGATGCCTTCCGGTGAAGCATCATTTGTACAGGTAATAAG  
 AGATATACAAAATCGTAATATATGATTAATGTAGCATTTCTATACTCACC GTTAAAATCT  
 TCATTGATAATCATTGTTGATAGTTTCTTAACTTGTTTGCTAGCTCGAGACTTAGGTCT  
 ATTCATTGGGCTTGGGGTTGGCAGTGGCACAATTCTTTTGCTCATTGCAGTTGGTGCTCC  
 CTTCTATCAAGGAAAATGAAGGTACGCAAGCTGAAAAGGATGAGACAGACATTTTTCAA  
 CAAAACCACGGGTTGCTATTACAGCGACTGATCTCACAAAATGCGCACATTAGTGAGAG  
 GATGATCCTAACATTACCAGTGCTAGAAAAGGCCACAAATAATTTTGATAGAACTCGCGA  
 GGTTGGTGGTGGAGGACATGGGATCGTATACAAGGGAATATTAACCTGGAGGTTGTTGC  
 CATTAAGAAGTCGATGATCATAGTAGAAAAGAGAAAATAAACGATTTTCATAAATGAAGTGGC  
 AATTCTCTCTCAAATCAACCATAGAAACGTAGTCAAGCTTATAGGATGTTGCCTAGAGAC  
 CGAAGTTCCATTATTAGTCTATGAATTTATTTCAAATGGATCCCTAGATCAACATTTTCA  
 TGTTGATGAACCAATTTTCGCTTTTCATGGAAGGACCGAATGAGGATAGCTGTTGAAGTTGC  
 TAGAGCTTTAACTTATTTGCATTTCAGCTGCTACAGTACCGGTATTCATAGGGACATTAA  
 GGCATGCAACATACCTCTTGACAATTAGTTAATAGCAAAGGTATCGGACTTTGGAGCTTC  
 ACGATATGTCCCTATCAATCAAACCTGAAGTGACTAATGCTGTCCAGGGAACGATCGGTTA  
 CTTAGATCCCGAGTATTATTATACAGGCCATTTAATGGACAAAAGTGACGTTTTTAGCTT  
 TGGAGTTCTTGTAATAGAACTTCTTACTCGGAAAAGACCCACCTATAGGACTGATCAGGG  
 TGATAGTTTAGTTTTGCATTTTGCATCACTACTGAGACAAGGACAGCTGGTTGGGATACT  
 GGATCCTCAAGTCCTGACCGAGGGAGGTGGAGAAGTCATGGAAGTAGCATTACTTGCTGG  
 GATGTGCACTAGAATGACTGGACAAGATCGCCCTACTATGAGAGAAGTCGAGATGGGACT  
 GGAAAACCTGCGAGTTAGTAAGAAAACCTTGCTTCACATGATACAGCATCAAGTAGCCTTGT  
 ATCTCAGATGGCAGAGCATCGCATGATAGCGACAGGGGACATGGAGGAATCAAGCATACA  
 GTACAGTATGGAAAAATAG

>OsWAK86 9637. t01417, Chromosome 9, post-processing  
 ATGCCAGGAACTATGTCGTCGTCGTCCTTAGCAGCCTGGCTGCACTAGTGCTGCTG  
 CTGCCGCCGTTGTTTGCTGCTGTGGATGATGGGATGAGGAGCGGCGGCAAGTGCACCAAC  
 AGCTGCGGCAACGTCGGCTTCGAGTACCCGTTGCGCGTGGAGGACGGGTGCTACCGCGGC  
 GGCGGCTTCAACCTCACCTGCAACCACACGTACCAAGTCGCCCAGGCTGTTCTCGGCGAT  
 GGCAGCGTGCAAGTGCTCGACATCTCCGTGCCACACGGGTGGGCGCTGATCAACAACACC  
 GGCATGGTGTCAACTCCACCGAGACGCGGGTCTCCTCAACAGAACATGGGATCAGCTG  
 GTGGGAGGCCCCCTACTCCTTATCGGGCTCAAACAAGATAGCTCTGGTAGGCTGCAATGCC  
 AGGGTTGATCTTCGCGCCCGGGTAAAAGTAAAACACGGCGGCGCGCGGCGGACGACGAT  
 ACTGGAAGTAATCTGATCAGCTCATGCACTGCCGTCTGCCATTAGACCTCGAGGACATG  
 ACTCCGGTTTTTCGCCATCGGTTCTGGCGGTAGCAGCGCAGCGTGCTCCGGGGTTGGCTGC  
 TGCCAAGCAGACATCAACTTAGACATCCCCTCTTCGTACACAATCCAGATCCACAACCTTG  
 CAGGAGCTGGGAGGCTCCATCAGTCCAACGGATCTAGTGTTTCATATCGAAAGAGGAGTTC  
 AGCTACCAACATGACATGGCTTTTCGGCAACAACATCCACAGGCGCTCCAGCCCTGCTA  
 GATTGGTATATAAGCAGTACCCCATCAGAGTGACGTACGAATCAGCCCCCGATTGTCTC  
 AGCGCCAACAGCTTCTGCCACGCTTACGACCTTGGGTACAAGTGCCACTGCTCCGATGGT  
 TACCAAGGAAATCCATACATTTCGCGGTGGATGCCATGATATCGATGAATGCAAGTCCCC  
 CAAGATTATTCATGTTACGGCAACTGCAACAACACGCCAGGATCGCACATTTGCGACTGT  
 CCTCGTGGCTACGAGCGCAATGCTTCCACACCAAATGGATGCAAAGACATCGATGAGTGT  
 GGGCACCGCGAAACTTACCAGTGCTATGGAGAGTGCAATTAATTTCCCTGGAGGTTTCGAT  
 TGGCTCTGCTACCATGGAAGTACGCGGGATCCCAGAAAAGAAGGGGGATGCCTTCCGGTG  
 AAGCATCATTTGTGCTCAGCTCGAGACTTAGGTCTATTATTGGGCTTGGGGTTGGCAGTGGC  
 ACAATTCTTTTGCTCATTGCAGTTGGTGCTCCCTTCTATCAAGGAAAATGAAGGACCGA  
 ATGAGGATAGCTGTTGAAGTTGCTAGAGCTTTAACTTATTTGCATTACAGCTGCTACAGTA  
 CCGTTAATAGCAAAGGTATCGGACTTTGGAGCTTACGATATGTCCCTATCAATCAAACCT  
 GAAGTGACTAATGCTGTCCAGGGAACGATCGGTTACTTAGATCCCGAGTATTATTATACA  
 GGCCATTTAATGGACAAAAGTGACGTTTTTAGCTTTGGAGTTCTTGTAATAGAACTTCTT  
 ACTCGGAAAAGACCCACCTATAGGACTGATCAGGGTGATAGTTTAGTTTTGCATTTTGCA  
 TCACTACTGAGACAAGGACAGCTGGTTGGGATACTGGATCCTCAAGTCCTGACCGAGGGA  
 GGTGGAGAAGTCATGGAAGTAGCATTACTTGCTGGGATGTGCACTAGAATGACTGGACAA  
 GATCGCCCTACTATGAGAGAAGTCGAGATGGGACTGGAAAACCTGCGAGTTAGTAAGAAA  
 CTTGCTTACATGATAGACATCAAGTAGCCTTGATCTCAGATGGCAGAGCATCGCATG  
 ATAGCGACAGGGGACATGGAGGAATCAAGCATACAGTACAGTATGGAAAAATAG

>OsWAK87 9637. t02672, Chromosome 9, pre-processing  
 ATGGCGCCCTCTCCTGTTATCCTTGTTATGGCTGCACTGTTTCTCCAAGCTGCAACAATG  
 GCGGCAACAACCGCTAACCGTATCGCTGCCGGGCTGCCGAGCTCGTGCGGCAGCATG  
 GTCATCCCCTACCCGTTACCGCTCGGCGCCGCTGCCACCTCGCCGGCTTCGCCGTACC  
 TGCAACCGCTCCTACCACCCACCGAAGCTCTTCTGCGCGACGCCGACGCCGCTGAGGTG

OsWAKs-Supplemental Data 1[1].txt

CTCGAGATATCCCTCCTAAACTCCACGGTGATCGTCAGCAGCGCCGTCCGGTACGACGCC  
GCCAAAGGCGAGGGCGCGTGGGGCCGCGGCCTCGCCGGCGCGTTCGCGCTCAGGGAGCGG  
CGGAACCGGCTCGTCGTGGGGTGAACCTGCAGGCCGTCTCTGGACGGCGACGAC  
ATCGCCGCGCGCTGACCAACCTCTGCGGCGCGCGGCCACCTGGCCAGCAGCGGCC  
GACGGCGAGCTCGCGGATTACTCGTCGCGGGCGTTGGCTGCTGCCAGGCTTCCATCTAC  
CTAGGCCTCACGTCGTACGGCGTTTCGGCTGTGCGCGTTTCGGCACAAGCACCGGGCCGCCG  
CCGCCGCCGCCGACCTCCTCCGCCTCGTCGTCTAACCAATCGGATTCGGCTCTCGTGTTT  
GTGCGGGACAACGAGTGGTTGGCGGGGAACGCGAGTAAGCTCGGATCAGCAGCAGCGACG  
ATGCGACCGGGCGGCGGCGGCATGCCGGTGGCGCTGGCCGTGCTCGACTGGGCGATCGGG  
AAGTCGGGGTGTCCGCCGATGGGCCGACGACACGGCCTGTAGCAGCAGCAACAGCTAC  
TGCCGCAACTCTACCAGCACCTCGCTTGGCGGCTACTCGTGCCAGTGCGACAACGGGTAC  
CAAGGCAATCCGTACGTTGCAATGGATGTCAAGGTAATTTGTTACTCCCTACTTCCCTA  
AATGTTTGATGCCGTTGACTTTTTAAACATGTTTAAACCGTTTATCTTATTTAAAACTT  
TTGTGAAATATGTAACCTATATATATACATAAAAGTATATTTAACAAATGAGTCAAATGG  
TAGGAAAAAATTAATAATTGCTTAATTTTTTTGAATAAGACGAACGATCAAACATATTTT  
AAAAAGTCAACGGCGTCAAACATTTAGGGATGGAGGGAGTATAAGGGTGTAAACATGTAA  
GTGGAGAAACAACGAGGGTCTTCTGATTAGCTTCAAGGTGGTGGGCTAGCTGTTCTG  
GGTTTCGATGCCTCACCTTCTATTTAGTTTGATATTAAATCATTTTCTAATATTTTAGCT  
TATAAGTGTGTTTAAACGATTAGTCATTTACACTTGAAGTTGCATAAGTATAGCCTCTCA  
TCGTTTGTCTTAGATTAGAGCCGCGGCTAAAATTTAAACCTAATTTTAAAGTTGAT  
TTTAGTTTTCTTATTATAGTCAATTTTTGCGGTTAAAATTTTAAACCGCTATTAATAGT  
TTTATTTATAAATTATTTTTGTTGTTTAGTATATTTTTCTATGGCTTACCAACCATAGT  
TCAATGATTAGTGAATTTAGAACAGAATGGTACAAAATTTTTCTAAATTTCTCCCTTTC  
AGATATCGACGAGTGCGCTCTGCCAGAAGAATATCCCTGCTACGGTGAATGCACAAACAA  
GCCAGGATCGTTTTCGTGATGTGTCCGGGTGGGACGCACGGTGATGCTATGAACGAAGG  
AGGATGTGAACCAACGAGTACATAGAAATTTCTCTTCAATTTATACTTAAATTTATCCT  
TGCAATCTTCTCTGCAAAATCCTTGACAAACAGGGTTAGAAATTTGACCGTATCTTCTG  
CTGGCAGCTCTCCTTGTGGCGATAGGAGGAACCATCGGCATAGGAATTCATCCGTGTTT  
GTGATAGGCATGGCAATGACGAACATGATCAAGGCACGGAGGGCCAAGAACTGAGAGCC  
GTATTTCTTCAAGCAGAACCAGGGGTTTACTGCTGCTGCAACTTGTGATAAGGTGATTGCT  
GAAAGGATGGTGTTTACCTTGAAGAGCTCGAAAAGGCAACAAATCGATTGACGAGATG  
AGAAAGCTCGGCAGCGCGGCCATGGCACTGTCTACAAAGGCACCTTGCAGACAGACGT  
GTCGTTGCCATCAAGAAATCGAATATTACGGTTTCGTAAGGAGATCGATGATTTTATAAAC  
GAAGTTGTCAATCTTTCGCAGATCAACCATCGGAATGTTGTGCGGTTATTCGGATGTTGC  
CTTGAAACACAGGTTCCACTACTGGTCTACGAGTTCATATCGAACGGCACTCTTTCGGAC  
CATCTCCATGTTGAAGGCCCTACATTGTTGTCATGGAAAAATAGATTGAGGATTGCTCTT  
GAAGCTGCAAGCGCTTTAGCCTACTTACATTCATCCGCTTCACTATCAATAATTCATAGG  
GATGTTAAGTCTGCTAACATATTGCTTGTGCTTAAACAGCAAAAGTTTCGGACTTT  
GGAGCCTCTCGAGGCATTCGGGTTGATCAAGGTGGTGTGACAACAGTGATCCAAGGCACA  
TTTGGATATCTTGATCCTGAATACTATCAACAAGTAGATTGACCGATAAGAGTGATGTG  
TACAGTTTTGGTGTCTACTCTGTGGAGATGCTCACAAGGAAGAAGCCTACTGTTTTTGAA  
TCATCAGATAATGTCAGCCTAATTGCACTTTTTAATTTGCTAATGGTACAGGACAACATC  
TACGAGATATTAGACCTCAGGTAATTTCCGAGGGCATGGAAAATGTGAAAGAAGTCGCG  
GCGCTAGCATCGGCATGCCTAAGATTGAAGGGGAAGAGAGGCCAACAAATGAGGCAAGTG  
GAGATAAGGCTGGAAAGGCTGTTAGGCGGTGACATTTTGAAGGGCTTTCAGCTGAGCTG  
CACTGTCTACCACCTCAACTGAGCAATACCGACACTACTAGCAAGCTATACAACATGGAG  
CGGGATTTTTTGTATCGTCGAGCTTCCACGGTGATCTTACTACATGTGTACAACTAC  
ATACAACCTTACCCTTAAAGTTGTTTAGCATGTGTTGATTTGAAGATGAGGTGAGATG  
TGTTAGATGAATTTGGGATCACCTGCAGTGGCTATAGAAAGTGATATCCGAAACCTTCTG  
AATCAACTCAAAAAAAGAAATCTTCTGAATACTGTTCAAAAAAGACAGTA  
CCAAGGTTTCTCCTGTAGGCTGTAGCTAGAAGTGTAGCAGATAATGTTTAAACTACACT  
GTAGCGTCGGTTTTAGTCGTTATTGTCTTGTATCCAAGGATGGAAAAGAGTTTCTACTGGC  
AAAGTTGCAGTCTCTGTTATGACTGCATTGGATCTTTATCCTGATCCCAATTATTCATTT  
GACATGAGTCATGACCTCGTGATGTAATACAACCTACAACCTACAAGCAGCTCTGTAGCA  
TCAATGTTGCTGCCTCTGCCGCTGCCGCTTCCACAACCTCCCATGGCTTTCTTTGTTGATC  
TTGCTCTAGTACGATGAAGTACAATACTGCGTAATTTTCAAGTTGATACAGAAGATGT  
TCAGTTTTGCTATTTCCAGCGACTTGTTCGAAGTCCATGTCACATCGGATATTTGGACAC  
TAATTTGGAGATTAA

>OsWAK87 gi |32984791|dbj |AK099582.1| Oryza sativa (japonica cultivar-group)  
cDNA clone: J013041M17, full insert sequence  
GAGTATTTCTTCTGTGATCGAGCCACTGAATCGATCAGCTCCATGGCGCCCTCTCTGTTATCCTTGTT  
ATGGCTGCACTGTTTCTCCAAGCTGCAACAATGGCGGCAACAACCGCGCTAACCGTATCGCTGCCGGCT

OsWAKs-Supplemental Data 1[1].txt

GCCCGAGCTCGTGCGGCAGCATGGTTCATCCCCTACCCGTTTCGGCGTTCGGCGCCGGCTGCCACCTCGCCGG  
 CTTTCGCGGTACCTGCAACCGCTCCTACCACCCACCGAAGCTCTTCCTGCGCGACGCCGACGCCGCTGAG  
 GTGCTCGAGATATCCCTCCTAACTCCACGGTGATCGTCAGCAGCGCCGTCCGGTACGACGCCGCCAAAG  
 GCGAGGGCGCGTGGGGCCGCGGCCTCGCCGGCGCGTTCGCGCTCAGGGAGCGGCGGAACCGGCTCGTCGT  
 CGTGGGGTGCAACCTGCAGGCCGTCTCTGGACGGCGACGACATCGCCGCCGCGTGCACCACCATCTGC  
 GCGCGCGCCGGCGCCACCTGGCCAGCAGCGGCCGACGGCGAGCTCGCGGATTACTCGTGCGCGGGCGTTG  
 GCTGCTGCCAGGCTTCCATCTACCTAGGCCTCACGTGCTACGGCGTTCGGCTGTGCGCCGTTTCGGCACAAG  
 CACCGGGCGCCGCCGCCGCCGACCTCCTCCGCTCGTCTAACCAATCGGATTCGGCTCTCGTG  
 TTCGTCGCGGACAACGAGTGTTTCGGCGGGAACCGGAGTAAGCTCGGATCAGCAGCAGCGACGATGCGAC  
 CGGGCGTTCGGCGGCATGCCGGTGGCGCTGGCCGTGCTCGACTGGGCGATCGGGAAGTCGGGGTGTCCGCC  
 GCATGGGCCCCGACGACACGGCCTGTAGCAGCAGCAACAGCTACTGCCGCAACTCTACCAGCACCTCGCTT  
 GGCGGCTACTCGTGCCAGTGCGACAACGGGTACCAAGGCAATCCGTACGTTGCAAATGGATGTCAAGGTA  
 ATTTGTTACTCCCTACTTCCCTAAATGTTTGATGCCGTTGACTTTTTAAACATGTTTAACCGTTCATCT  
 TATTTTAAAACTTTTGTGAAATATGTAAACTATATATACATAAAAGTATATTTAACAATGAGTCAA  
 ATGGTAGGAAAAAATTAATAATTGCTTAATTTTTTTGAATAAGACGAACGATCAAACATATTTCAAAAAAG  
 TCAACGGCGTCAAACATTTAGGGATGGAGGGAGTATAAGGGTGTAAACATGTAAAGTGGAGAAACAACGA  
 GGGTCTTCTGATTAGCTTCAAGGTGGTGGGCTAGCTGTTCTGGGTTTCGATGCCTCACCCCTTCTATTTA  
 GTTTGATATTAAATCATTTCCCTAATATTTAGCTTATAAGTGTGTTTAACGGATTAGTCATTTACACTTG  
 AAGTTGCATAAGTATAGCCTCTCATCGTTTGCTGCTAGATTATGAGCCGCGGCTAAAATCTAAAACCTA  
 ATTTTAAAGTTGATTTTGTGTTTCTTATTATAGTCAATCTTTTCCGTTAAAATTTTAAACCGCTATTA  
 TAGTTTTATTTATAAATTTTGTTCGTTTGTATATTTTTCTATGGCTTACCAACCATAGTTCAAAT  
 GATTAGTGAATTTAGAACAAGATGGTACAAAATTTTTCTAAATTTCTCCCTTTAGATATCGACGAGTGC  
 GCTCTGCCAGAAGAATATCCCTGCTACGGTGAATGCACAAACAAGCCAGGATCGTTTTCTGTCATGTGTC  
 CGGGTGGGACGCACGGTGATGCTATGAACGAAGGAGGATGTGAACCAACGACTCTCCTTGTGGCGATAGG  
 AGGAACCATCGGCATAGGAATTCATCCGTGTTCTGATAGGCATGGCAATGACGAACATGATCAAGGCA  
 CGGAGGGCCAAGAACTGAGAGCCGATTTCTTCAAGCAGAACCAGGGTTTACTGCTGCTGCAACTTGTG  
 ATAAGGTGATTGCTGAAAGGATGGTATTTACCTTGGAAAGAGCTCGAAAAGGCAACAAATCGATTCCAGCG  
 GATGAGAAAGCTCGGCAGCGGCGGCCATGGCACTGTCTACAAAGGCACCTTGCCAGACAGACGTGTGCTT  
 GCCATCAAGAAATCGAATATTACGGTTCGTAAGGAGATCGATGATTTTATAAACGAAGTTGTCTTTT  
 CGCAGATCAACCATCGGAATGTTGTGCGGTTATTCGGATGTTGCCCTTGAACACAGGTTCCACTACTGGT  
 CTACGAGTTCATATCGAACGGCACTCTTCCGACCATCTCCATGTTGAAGGCCCTACATTGTTGTCATGG  
 AAAAATAGATTGAGGATTGCTCTTGAAGCTGCAAGCGCTTTAGCCTACTTACATTCATCCGCTTCAGTAT  
 CAATAATTCATAGGGATGTTAAGTCTGCTAACATATTGCTTGATGGTTCGCTTAACAGCAAAAGTTTCGGA  
 CTTTGGAGCCTCTCGAGGCATTCCGGTTGATCAAGGTGGTGTGACAACAGTGATCCAAGGCACATTTGGA  
 TATCTTGATCCTGAATACTATCAACAAGTAGATTGACCGATAAGAGTGATGTGTACAGTTTTTGGTGTCA  
 TACTCGTGGAGATGCTCACAAGGAAGAAGCCTACTGTTTTGAATCATCAGATAATGTCAGCCTAATTGC  
 ACTTTTTAATTTGCTAATGGTACAGGACAACATCTACGAGATATTAGACCCTCAGGTAATTTCCGAGGGC  
 ATGAAAAATGAAAAAGAGTCGCGCGCTAGCATCGGCATGCCTAAGATTGAAGGGGAAGAGAGGCCAA  
 CAATGAGGCAAGTGGAGATAAGGCTGGAAAGGCTGTTAGGCGGTGACATTTTGCAAGGGCTTTACAGTGA  
 GCTGCACTGTCTACCACCTCAACTGAGCAATACCGACACTACTAGCAAGCTATACAACATGGAGCGGGAT  
 TTTTTGCTATCGTCGAGCTTCCACGGTGATCTTACTACATGTGTACAACTACATACAACCTTTACCCT  
 TAAAGTTGTTTAGCATGTGTTGATTTGAAGATGAGGTGAGATGTGTTAGATGAATTGGGATC

>OsWAK88, 4967.t00009, Chromosome 9, pre-processing  
 ATGACGATGCTTCCGGCGACGGCGGCGGCGCTGCTGGTGGTGGTGCAGCTGATGTGG  
 TCGGCGGAAGCGCAGGTGGCGGTGGGCTCAGGGCCGCCGGCGGGCTGCCCGACAGGTGC  
 GGCAACGTGAGCGTGCCGTTCCCGTTTGGCATCCGCGACGGGTGCTCCCTCGAGGGATT  
 GGCCTCACCTGCAACACCACGAGCAATCCCCCGCGCCTGATGATCGGCAACAGCACACTG  
 CAAGTCGTCAACATCTCGTGGCCAACTCCACGCTGCGCGCCGTCGACATCGACGGCGCC  
 GTGAACATCACCTACGGGAGATCGACGGCAACGGCACGTGGGTGGCGTCTGTCGCGAGC  
 CCGTACATCGTGAACGAGACCCTGAACCAGCTCCTCGTCACGGGGTGCAACATCCAGGTA  
 ACCCTTGTGCGGACGGCGGGAACGTATCTCCGGCTGCTCTTCTTCTGCTCCATCAAC  
 GACATGTACACGGGTGGCGTGTTCAGAAGCCAGGCAACAAGTGCGCGGGCATCGGTTGC  
 TGCCAGCAGCAGGTCTCCATCGGCCGCCCTCCTACCGCGTGGAATTGACGAACCTGGAC  
 AGGGATCGTGAGTTACGCGGTAGGGTGCCCGAAGCGGTGCGCATCGCCGAGCTGGGCTGG  
 TTCGACGGCTCGCCCGGACCTGCTCAACGTGTCGTTGGCGGACACCTCGCGCCGGAAC  
 CCGGTTCCGGTGGTGTGATTGGGCGGTGGCGTCCACCGGCCTGGATGTACGCTCAAC  
 GCCGGGCTGAACAAACAGGCTGCCAATAACTGGTCTGCCCCACGGCCGCTCGGGCAGG  
 AAGAGCGCGTGATAAGCAGCAACAGCTTCTGCCGCAACATCGCCGACAACCTACCGAAGC  
 GGTTACGTCTGCCGTTGTGACAAGGGGTACGACGGGAACCCGTACGTGCGCGGCGGATGC  
 CAAGACATCAACGAGTGCGAGCGGGCGAAGGAGAACGGCTGCTTCGGCGAGTGCACCAAC  
 ACGCCGGGAGCCTTCTTGTGAGGTGCCGACGGTGCCCGTGGTAACGCCACCATTTCCA  
 AATGGCTGCACCAATCCAATCTAGGTAGCTAAATTAATCTGCTCGCCATTTTCAATT



OsWAKs-Supplemental Data 1[1].txt

TATTCAGAGATTATTGTATATATAGCTACCTCCTCCGTCTTACAATATATCTACCAAGCT  
TTAGCTATAGAGGTGACTAGTGACTGTTCTCTCTTCCAAACAAAGATGCAAACCTCTGTTT  
TTCTAATCTACAGGTTAAATGTCTTAACCTCTAATGAGAAGTTCAATTTCTATTGTGCT  
CCTAGGTTTAAACAATTGGAGTTGGAATTGGTAGTGGTGCCGGCCTTTTTATCCTGGCACT  
TGGTGCTGTCTTTTTAACACGTAGGATTAACAACGGAGAGCAAGAACACTGAGACAGAA  
GTTCTTCAAACAGAACCGTGGCCATTTGTTGCAACAATTGGTATCTCAAAAGGCCGACAT  
TGCGGAAAGAATGATCATCCCCTTGGCAGAACTAGAAAAGGCCACAAACAACCTTTGACGA  
ATCGCGTGAGCTTGGAGGAGGAGGACATGGCACCGTATACAAAGGTATTCTCTCAAACCT  
TCATGTTTGTGCAATCAAGAAATCAAATGTGACAGTCCAAAGGGAGATTGATGAGTTTCAT  
AAACGAGGTAGCCATTCTATCATAAATCAACCACCGTAATGTGGTGAAACTTTTTGGATG  
TTGTCTTGAGACCGAAGTGCCATTGTTGGTTTATGAATTCATATCAAATGGTACACTTTA  
TCATCATCTTCATGTTGAAGGACCAACATCGTTGCCATGGGAAGATAGGCTCAGAATTGC  
TACTGAAACAGCTAGATCCCTCACTTACCTTCACTCTGCCGTGTCATTTCTATAATCCA  
TAGGGATATCAAGTCCCATATATCCTATTGGATGGCTCACTAACAGCAAAAGTCTCAGA  
CTTTGGAGCTTCAAGGTGCATCCCACTGAACAAAATGGGGTTACAACCTGCTATTCAAGG  
AACACTAGGATACCTAGACCCCATATATTACTACACAGGACGTCTCACAGATAAGAGTGA  
TATTTATAGCTTCGGCGTTGTTTTAATGGAGTTGCTTACTAGGAAAAAACCATATTCTATA  
CAGATCGGCTGAGGATGAGAGCCTTGTGTCACATTTCACTACCTACATGCACAGGGCAA  
CTTGGGTGACATACTTGATGCGCAGGTTATAGAGGAGGGAACAAAGGAAGTTAATGATGT  
AGCCCAATTAGCTGTGGCATGTGCCAAGTTGAAAGCAGAAGAGCGACCGACTATGAGACA  
GGTGGAAATGACACTCGAGAGCATTCGGCAAGAAGTACTGCATAGTGTGAGCACAAAGAA  
ATCTAAGGAGCTTCACGTCTCATGGAACCATGCAATAAGTGAGGGTACAACTTGGAGAC  
AACTAGGCAATATAGTCTTGAAGAAGAGTACTTGTATCATCGAGGTACCCCGGTAGCA  
GTTTTTCCATTTTTCTTGTGTGAGTTTGGATCAATATAGAAGGCTCGTGTGTCCTCAAT  
GTACAAGGTCTCCATGGGTTTTTTTTATTTATCCATGTATGATATGCATGTAGTATTTT  
ATAGCTAAATGTAACATCTTATTTTTATTGTTCTTCATCTGAATGTGATTTTTTTCTGT  
TTGATTTTCATCCAAGTAAAGGTCAAGATATCCTTTGTATTGTATTCACTTATGATACTGA  
ACTAATATGTTTTCGGGCTACTAAACATCATCTGCTTAATACTCGCTATGTTTCACTTT  
ATAAATCATTTTTGATTTTTTTTTACTAGTCAAACCTTATTTAAGTTGACCAATTTTATAGTA  
AAGTTTAGTAACATTTACAACGCCAAATTACGCCAAATTACTTTTCGCTAAAACCTAATATT  
TAATGTATTTTGATAATACATTTGTTTTGTGTTGAAAATATTGCTATATATTTCTATAAA  
TTTAATTAATAATAAAAAAGTTAACTTAAAAAATTAATAATGACAGGGAGTATCTTCT  
ACCAAGCTGTGACACTTCAATTGTAATAGTTAGCGATGTTGGTTCAGCGATAACTTGT  
GCGACGGCGCTGTGATCGGCAGAAACAGATTTCCGGGGACGCAATGCCGGCAGTGA

>OsWAK88, 4967. t00009, Chromosome 9, post-processing  
ATGACGATGCTTCCGGCGACGGCGGGCGGCGCTGCTGGTGCTGGTGCTGCAGCTGATGTGG  
TCGGCGGAAGCGCAGGTGGCGGTGGGCTCAGGGCCGCGGGCGGGCTGCCCGGACAGGTGC  
TGCACAGTGAAGCGTGCCGTTCCCGTTTGGCATCCGCGACGGGTGCTCCCTCGAGGGATT  
GGCCTCACCTGCAACACCACGAGCAATCCCCCGCGCTGATGATCGGCAACAGCACACTG  
CAAGTCGTCAACATCTCGCTGGCCAACCTCCACGCTGCGCGCCGTCGACATCGACGGCGCC  
GTGAACATCACCTACGGGCAGATCGACGGCAACGGCACGTGGGTGCGCGTCTGCGGAGC  
CCGTACATCGTGAACGAGACCTGAACCAGCTCCTCGTCACGGGGTGAACATCCAGGTA  
ACCTTTGTGGCAGCGCGGGAACGTATCTCGGCTGCTCTTCTTCTGCTCCATCAAC  
GACATGTACACGGGTGGCGTGTTCAGAAGCCAGGCAACAAGTGCGCGGGCATCGGTTGC  
TGCCAGCAGCAGGTCTCCATCGGCCGCCCTCCTACCGCGTGGAATTGACGAACCTGGAC  
AGGGATCGTGAGTTGAGCGGTAGGGTGCCGAAGCGGTGCGCATCGCCGAGCTGGGCTGG  
TTGACAGGCCTCGCCGCCGACCTGCTCAACGTGTGTTGGCGGACACCTCGCGCCGGAAC  
CCGTTTCCGGTGGTGCTGGATTGGGCGGTGGCGTCCACGGGCTGGATGTACGCTCAAC  
GCCGGGCTGAACAAACAGGTTGCCAATAACTGGTCTGCCCCACGGCCGCTCGGGCAGG  
AAGAGCGCGTGATAAGCAGCAACAGCTTCTGCCGCAACATCGCCGACAACCTACCGAAGC  
GGTTACGTCTGCCGTTGTGACAAGGGGTACGACGGGAACCCGTACGTGCGCGGCGGATGC  
CAAGACATCAACGAGTGCAGCGGGCGAAGGAGAACGGCTGCTTCGGCGAGTGACCAAC  
ACGCCGGGAGCCTTCTTGTGACAGGTGCCCGCACGGTGCCCGTGGTAACGCCACCATTTCA  
AATGGCTGCACCAATCAATCTAGGTTTAAACAATTGGAGTTGGAATTGGTAGTGGTGCC  
GGCCTTTTTATCCTGGCATCTGGTGTCTTTTTTAAACAGTAGGATTAACAACGAGAGA  
GCAAGAACACTGAGACAGAAGTTCTTCAAACAGAACCGTGGCCATTTGTTGCAACAATTG  
GTATCTCAAAAGGCCGACATTGCGGAAAGAATGATCATCCCCTTGGCAGAACTAGAAAAG  
GCCACAAACAACCTTTGACGAATCGCGTGAGCTTGGAGGAGGAGGACATGGCACCGTATAC  
AAAGGTATTCTCTCAAACCTTCATGTTGTGCAATCAAGAAATCAAATGTGACAGTCCAA  
AGGAGATTTGATGAGTTTATAACGAGACCGAAGTGCCATTGTTGGTTTATGAATTCATA  
TCAAATGGTACACTTTATCATCTTTCATGTTGAAGGACCAACATCGTTGCCATGGGAA  
GATAGGCTCAGAATTGCTACTGAAACAGCTAGATCCCTCACTTACCTTCACTCTGCCGTG

OsWAKs-Supplemental Data 1[1].txt

TCATTTCTATAATCCATAGGGATATCAAGTCCCATAATATCCTATTGGATGGCTCACTA  
ACAGCAAAAGTCTCAGACTTTGGAGCTTCAAGGTGCATCCCACTGAACAAAATGGGGTT  
ACAAGTGTATTTCAAGGAACACTAGGATACCTAGACCCATATATTACTACACAGGACGT  
CTCACAGATAAGAGTGATATTTATAGCTTCGGCGTTGTTTTAATGGAGTTGCTTACTAGG  
AAAAAACCATATTCATACAGATCGGCTGAGGATGAGAGCCTTGTTGCACATTTAGTACC  
CTACATGCACAGGGCAACTTGGGTGACATACTTGATGCGCAGGTTATAGAGGAGGGAACA  
AAGGAAGTTAATGATGTAGCCACATTAGCTGTGGCATGTGCCAAGTTGAAAGCAGAAGAG  
CGACCGACTATGAGACAGGTGGAAATGACACTCGAGAGCATTGGCAAGAAGTACTGCAT  
AGTGTGAGCACAAAGAAATCTAAGGAGCTTCACGTCTCATGGAACCATGCAATAAGTGAG  
GGGAGTATCTTCTACCAAGCTGTGACACTTCAATTGTAATAGTTAGCGATGTTGGTTCC  
AGCGATAACTTGTGCGACGGCGCTGTGATCGGCAGAAACAGATTTCCGGGGACGCAATGC  
CGGCAGTGA

>OsWAK89 9637. t03234, Chromosome 9, pre-processing  
ATGGCTACCAGCCCCAGTGCCCTGCACATGCAGGCGGTTGCCTTAGGCGCCGCCGTGTTT  
CTCCTCTCCTGCCTTGCGTGGCTCAGCAGCCGCCGGCGCCGGGCTGCCTCGACAAGTGC  
GGGGACATCAACATCACCTATCCCTTCGGCGTGGCGGGCGCCATTGCTTCGCGATAAA  
AGCTTCCAGCTCGAGTGCAACGTCGTCGTCACAATTCCCATCCACGCCTCATCATGCCT  
GCCTATAATCAGCAGCTGCTCAGCCTGTCCCCGACGGCGAGGCGCTCGCCGCCCTCGAC  
ATCCAACATGAGGCTACTACTACAACGCAACGCGAGCCATCCACCGCCAGCGCCAGC  
AGCCAGCCGAACAACATGACGTTTGCAGCCTCAACAAAAGCACTGTCTACCGCTTCCCC  
GTGTCCACGTACCGCTTCAACGCCACCACCAACAGCTACGTCGTGCCCGTGGCGCTGGAC  
TGGGCCATCCGGGACGTCCACAACGTCAGCGCCGCCAAGCTCAACGCCACCAACTACGCG  
TGCCGGAGCGCCAACAGCAAATGCTCCGACACCACCGATGGCGCCGGGTACCGGTGCAGA  
TGTTCCGGGGGCTACGAGGGCAACCCCTACCTCCATGCCGGATGCCAAGGTATAGGTCAC  
CTCCCAAAATCAGTTATTTAATTTCTTATTAGCTCAAGCTAATATCTATCATATCGATTT  
GTTGCATGCATGGGGGATTTCGCGCGCAAAAGACATCGACGAGTGCCAGAGGACAAACGAGT  
ACCCGTGCTTCGGCAACTGCATCAACATGCCGGGAGGGTTCTCGTGCAGCTGCCCGCCTG  
GTACTCGTGGCAATCCGACCATTAAGAGCGGCTGCGTCAAACTAATCAAGGTAATAAAA  
TTAATCTGCTACAGTATCATTTTCTGATTTATTCTCAGACTGCATAATGCTAAAATAATC  
TACTACTTGAGAAGTTGAGTGTCCCAGTTATACATGCAAGGGAACCTGTCTGTGCAATA  
CAACCATCTTTCTTTAAGTGAACCTATATACTTGATCTTTTTCGAATATGTAACAGCT  
TTACATGTCAATATATTATAAGTAGAGTTAAATTTCAACTTGATTCTTCAACCTACTAT  
ACTTCATAAACAAGCAGACTATATTGTGCTCATTAAATCAATCTTTCCTTCACGTTTGC  
TTTTCCCATTAACAACCTGTTCCCCAAGAATTGGCCCTAACCTCTCTCAATTACAAAACA  
AAGCAAGCTCTCTCAAGGAGAAAACCTTTTTCTTAATTTCTTTTATATTGTGCTCCTAG  
GATTAACCAAGGATCAATTATTGGTATCGGAGTTGGCAGTGGCGCTGGGCTATTGGTCA  
TGGCATCGGTGCGCTTTTAAACACGTAACATTAAGAATCGGAAAGCAAGAATACTGA  
GACAGAAATTCTTCAACACGAAACCGTGGGCATTGTTGGAACAATTGGTATCTCAAAACG  
CTGATATTGCTGAAAGAATGATCATCCCTTGGCAGAACTGGAGAAGGCAACAAACAATT  
TTGATGAATCACGGGAGCTTGGAGGAGGGGACATGGCACCGTGTATAAAGGGATTTTAT  
CGGATCTTCATGTTGTTGCAATCAAAAAATCAAAAGTTGCAGTCCAAAGGGAGATTGATG  
AATTCATAAACGAGGTAGCCATTCTCTCACAATCAACCATCGTAATGTGGTCAAACCTTT  
TTGGATGTTGCTCGAGACAGAAGTACCATTGTTGGTCTATGAATTCATATCAAATGGTA  
CCCTTTACGACCATCTTCATGTGGAAGGACAACCATCATTGCCATGGGAATATAGGCTCA  
GAATTGCAACCGAAACCGCTAGAGCACTTGCCTACCTTCACTCGGCAGTATCGTTCCCTA  
TAATCCACAGGGATATCAAGTCCCATAACATCCTATTAGATGTCTCACTAACAACAAAAG  
TGTCAGATTTTGGAGCTTCAAGGTGCATTCTGTGTAACAAAATGGGGTCACAACCGCTA  
TTCAAGGAACACTAGGATACCTAGACCCCATGTACTACTACACAGGACGTCTCACAGAGA  
AAAGTGATGTTTTAGCTTCGGTGTGTTCTAATAGAGCTACTTACCAGGAAGAAACCAT  
ACTCATACAGATCGCCTCAGGATGATAGTCTTGTGACATTTCACTGCCCTACTCACAC  
ATGACAACCTTGAGTGACATACTTGATCCTCAGGTGAAGGAAGAGGGAGGCAAAGAGGTGA  
ATGAAGTAGCCGTGTTAGCCGTGGCATGTGTAAAGTTGAAAGCAGATGAACGACCGACTA  
TGAGGCAGGTGGAGATGACGCTTGAAACTGTTGATCATCGTTGCTGCGGCAAGAACTGG  
TACCTAGTGTGGCCGCGGAAGAATCCAAGGAGAAACATGTCTCATGGAGCTATCCGGTAA  
GCGAGGGCACAAGCATAGAGTCGAGTAGGCAATATAGTAATGATGAAGAATATTTGTTGT  
CATCGAGGTACCCTCGATAGTGGATTTTTATCCCTTTTTTTATTGTGCAAGTTTGGATCA  
ATAGTAAACGGTGCTCTCATGTACAATGTCTAGATGGCCCTTTATGATATCCATGCATTT  
CATTGCTATATGTACAACAATATTTTTTCGTTGTCAATTTATCTGAACGTGTGTGCTTTT  
TTGTATGGTTTGTTCATGTAATATATGTTTATCGACAAATTTCTCATTTAAATTTGTT  
GAATATTTATTTGTTGATTTGCACGACGCTTTGCTCCATCTTAGTTGTTTCTTCTCTAT  
GTTGTCTTGTACTGATACTTTACTCTTAGGATGGCAAGTTTGCCCATGGGTATGGGTA  
TCCGCAGATACCCGAACCGATGGGTACGGGTGTGGGTGTGATTTTTTACCCGTGGACATG

OsWAKs-Supplemental Data 1[1].txt

CTTGCCCGATGTAACGCCCAACATTCGTTAGCTGTAAACACAAGCCAATTTAGTAGTAG  
TCTTAGGATACACTAGCTGGTACACACAGGATAAATGTGAAATCAAAGTAACTACTTTA  
TTACATCATTGGGTACTAGTCCTGTAAACAATGAAATTTGGTAAGATAGACTCGGATTTG  
GAGTTGGATATCGAAGCGGAATTGAAGGAGATTGAATCTTGCCAAAACAGATTGTGCATC  
GCCTGCCCAGCGTATTGGCTGGAAATATAGTCGGATTATGACCGAGCTAATATGGCAAGC  
AGCCGATACAGCTTAACCTTGGGTTTCAGCATGGGCCTAGATTGGAATAACTGATGTTACCG  
GTTAGAGATTGAGCTCATTTAATGGAATTGTATCTATTAATTAGGATATTTAGTGTCCGT  
TTGAATTAGAGATTTGGTATGAGTCCGCCATGTGGACTTGCTTGTTTTATATTTAGGAA  
AGTTTGAGTCGTGTTCAATAATGGACTAAGTTTTGTGCTCGGTGTATAAATATAAACCCCA  
AATCATTTTTATAAAGGACGACAATCCAATCAATACAACCTTTCGGCGGATCACTACCCTT  
TTGTTTTTTACTTTTTGATGAGTTCTTGCTTCAAGTCAAGGTATTAGCTGTGATCTCTCT  
ACAAGAGGTAACCTTGCTCGATGGCTTGCGCTATCAGGGCTATTATATCGTTTTAGATGT  
TTTAGTCATTTTATCGTAGCCATTGTTATCATATCCTAGTTAATCTAGTCTTAGTATCTT  
GATTTAGTCATATCGGCTGATTCTCGCTTTAGAGTTTATGTCAATATCGGCTAAATCGCC  
TTACTATATTAGATTAGCTAAGGTATCTACCATCCCGAAAATTGATTAATTACTTGATCG  
TTTAGACTTTAGGTTTCTTTACATACTTTGTGATGCATCATCCCTAGTCTTCTCTAAAAC  
CCTATAAACTAACCTAGAATTAATCATAATTAATTAGACTGATTCAAATTGAAGTATAA  
TTAATACTCCATTCGGGTTGATAATACTTGTCTGTTTTGGACAAGGGCACGGTCTCTAGAA  
ATTAACCTCGACAACATTTTTCTATTATAATATATAGAAATATCAACAAATATATGAT  
TTTTATTGAAGTACTTTTTAAGACTAATCTACACATATGTTTCTCGTAGTTTTAAGACAAA  
TATTTTAAAAATTATTTATAGTCAAAGATTTTAAAGTTTGACTTTACCATTGTTCAAAAC  
GACTAATATTATCAGCCCGGAGAGAGTACTCCACGGGGACAAAATCCAATTCTGAAGAGC  
AAATGTCAATAGGCAAGGCAATTGACTGGCCCAAACCTGAGCATGTGCTAAGTGAACACA  
TGCTCGTCTTCATGTTTTCTCTGACAACCAACCGCATCCTTTTTCTACTCAACTGGAGCT  
AATTAAGTCAAATAACCGCGTGTGCATGGTGGCAAGATGCATCATCGTACTCACTTTCTA  
TTTATATGGAATTTCAACAGCCGGCATCCAAGCAAGCAAGCCGAACAACGTACGAGGTG  
AGAGCTAAGATGTGAGAAATGGCGGTGCGCTTAGCTATATTGCTCGTGGGCTTGGCGCG  
GCGACACCATTTGCTGTCGGCTCAGCAGCCGCGGGATGCCCTCAACGTGCGGGAACATC  
AGCATCCCTACCCCTTCGGCATCGGCGCCGGCTGCGCCGCGACGAGGGCTTCCAGCTC  
GAGTGCAACCACACCTCCTCACCCCACTCCTCATCGTGTCCAACCTCTACCGGCGGCGCG  
CACCGGCAACAGCTGCTGAGCCTGTCCCTCGCCGACGGCGAGGCGCGACCTTCTCACC  
GCCAAACGGCGGTGTCTACAACAGCAGCAGCGGGGACATGGTGAGCGAGAAGCATCAGAAC  
GCCACCGAGATGTCCCTCTCCGGCACGCCCTACCGTTTCTCCAGGTGAGGAACCGCTC  
GTCGCGCTCGGCTGCCCCAACCTCGCCTACCTGGTGCAGGCGAGGGGCTCCTACATCAGC  
AGCTGCACGTCCATCTGCCGGACGCCGGAGTCCGTCGCGCGCGGCTCCACGGTGGGCTTC  
ACCGGCGAGGGGTGCTGCCAGAGCAGCATACCCTACAGCGTCGACGTCTACAAGCCCGAC  
ATCATCGGCTTCAAGCAAGGCCAAGCTGGGGACTCCGTTCTGCTGAACAGCAGGCGGGCT  
TCTTCCATCTTGAGAGCAGCAGCGTTTGCCGGTACATGTACCTGGCGGAGGACAGGTGG  
ATCGACGCTCGGTACCGCGACGGCGCGCTCGACTTCAACCGCACCGACGACTTCCGCGTG  
CACGTGCTGCTCGACTGGGCGCTCCGGAACGCCGGCAACTGCAGCGCCGCCAGGCGCAAC  
CTCGCCGCGGCCAACTACGCGTGCCGGAGCGCCGACAGCGTGTGCGTCGACACCGGTGAC  
GGCGACGGGTACCGGTGCAACTGCTCCAAGGGCTACGAGGGCAACCCCTACCACGATGGC  
GGGTGCAAAGGTGAACAAATTAATTAACACACCTCCAAAATTTTGTTCAAAAATCTAT  
TGCTTTCTGCTGAATTAAGCTAATTTTCATTGATTTGGCGATCCGCGAAGACATCAAC  
GAGTGCGAGCGGGCAAGGAGTACCCGTGCTTCGGCGTGTGCATCAACACGCTGGGATCG  
TACCAGTGCAGCTGCCCGCCGGGTACTAGTGGCAACGCGACCATTCAAACTGGCTGCGTT  
AAAATAATCAAGGTAACATAATTAATCTGCTTATAATTTTCGAATTTATTTAGAGATTG  
AAGAACTTGAGAGTCCCAGCTATAGATACAATCATCTTACTACTTCATACATAAAAAAGC  
AGAATATGTTTTTCATAGACAATTTCTTCTTGACGTTGCTTTTATCATTAAATCATGATC  
TGTTCTGCAAGAATTGTCCTAATTAATGTTCTCAATTACAAACAATGCAAATTAACCT  
TCTGATGGAGAAGCTTTTTCTTCCCTCTTACACTAGCATTAACCACGGGATCAATTATT  
GGCATTGGAGTTGGTAGTGGCGCTGGGATTTTGGTCATGGCTCTCGGTGCAACCTTTTTA  
ACACATAGGATTAAGAATCGGAGAGCAAGAATGCTGAGACAGAAGTTCTTCAAACAGAAC  
CGTGGCCATTTGTTGGAACAGTTGGTATCTCAAAAGGCTGATATTGCTGAAAGGATGATC  
ATCCCTTTGGCAGAAGCTGGAGTAAGGCCACAAACAATTTTGATGAATCGCGTAAGCTTGA  
GGAGGAGGCGATGGCACTGTGTACAAAGGATTTTATCGGATCTTCACGTTGTTGCGATC  
AAGAAATCAAAGGTAGCAGTCCAAAGGGAGATTGATGAGTTCATAAACGAGGTAGCCATT  
CTCTCACAATCAACCATCGTAATGTGGTCAAACCTTTTGGATGTTGCCTCGAGACAGAA  
GTGCCATTGTTGGTCTATGAATTTATATCAAATGGTACCCTTTATGACCATCTTCATGTT  
GAAGGACCAACATCATTGCCATGGGAATATAGGCTTAGAATTACAACCGAAACCGCTAGA  
GCATTTGCCTACCTTCACTCGGCAGTGTCAATCCCTATAATCCACAGGGATATCAAGTCC  
CATAACATCTTATTAGTGGCTCGCTAACAACAAAAGTGTGAGACTTTGGAGCTTCAAGG  
TGTATTCCTGCTGAACAAAATGGGGTACAAACCGCAATTCAAGGAACACTAGGATACCTA

OsWAKs-Supplemental Data 1[1].txt

GACCCCATGTACTACTACACAGGACGTCTCACAGAGAAAAGTGATGTTTTAGTTTCGGT  
GTTGTTCTAATAGAGCTACTTACCAGGAAGAAACCATACTCATATAGATCGCCTGAGGAT  
GATAGTCTTGTGGCACATTTCACTGCCCTACTCACACATGGCAACTTGGGTGACATACTT  
GATCCTCAGATGAATGAAGAGGGAGGTAAGAGGTTAAAGAAGTAGCCATGTTAGCCGTG  
GCATGTGTCAAGTTGAAAGCAGATGAACGACCTACTATGAGGCAGGTGGAGATGACACTT  
GAAACTATTTCGATCGTCATCACTACAACAAGAAGTGGTACCTAGTGTGGCCGCGGAGGAA  
TCCAAGGAGAAACATGTCTCATGGAGCTATCCGGTATGTGAGGGCACAAGCATAGAGTCG  
AGTAGACAATATAGCTATGAGGAAGAGAATTTATTGTCATCGAGGTACCCCTCGATAG

>OsWAK89a >(gi |52077041: <43653-44301, 44973->46192) *Oryza sativa* (japonica cultivar-group) genomic DNA, chromosome 9, PAC clone: P0635G10

ATGGCTACCAGCCCCAGTGCCTGCACATGCAGGCGGTTGCCTTAGGCGCCGCGTGTCTCCTCTCCT  
GCCTTGCGTTCGGCTCAGCAGCCGCGCGCGCGGCTGCCTCGACAAGTGCGGGGACATCAACATCACCTA  
TCCCTTCGGCGTTCGGCGCGCGCCATTGCTTCCGCGATAAAAGCTTCCAGCTCGAGTGAACGTCGTGCTC  
AACAATTCCTATCCACGCCCTCATCATGCCTGCCTATAATCAGCAGCTGCTCAGCCTGTCCCCGACGGCG  
AGGCGCTCGCCGCCCTCGACATCCAACATGAGGCCTACTACTACAACGCAACGCGAGCCATCCCACCGC  
CAGCGCCAGCAGCCAGCCGAACAACATGACGTTTGCACCTCAACAAAAGCACTGTCTACCGCTTCCCC  
GTGTCCACGTACCGCTTCAACGCCACCACCAACAGCTACGTCGTGCCCGTTCGCGCTGGACTGGGCCATCC  
GGGACGTCCACAACGTCAGCGCGCGCAAGCTCAACGCCACCAACTACGCGTGCCGGAGCGCCAACAGCAA  
ATGCTCCGACACCACCGATGGCGCGGGTACCGGTGCAGATGTTCCGGGGGCTACGAGGGCAACCCCTAC  
CTCCATGCGCGGATGCCAAGGATTAACACGCGGATCAATTATTGGTATCGGAGTTGGCAGTGGCGCTGGGC  
TATTGGTCATGGCACTCGGTGCAGCCTTTTAAACAGTAACATTAAGAATCGGAAAGCAAGAATACTGAG  
ACAGAAATTTCTTCAACAGAACCGTGGGCATTTGTTGGAACAATTGGTATCTCAAAACGCTGATATTGCT  
GAAAGAATGATCATCCCCTTGGCAGAACTGGAGAAGGCAACAACAATTTTATGAATCACGGGAGCTTG  
GAGGAGGGGGACATGGCACCGTGTATAAAGGGATTTTATCGGATCTTCATGTTGTTGCAATCAAAAAATC  
AAAAGTTGCAGTCCAAAGGGAGATTGATGAATTCATAAACGAGGTAGCCATTCTCTCAAAATCAACCAT  
CGTAATGTGGTCAAACCTTTTGGATGTTGCCCTCGAGACAGAAGTACCATTGTTGGTCTATGAATTCATAT  
CAAATGGTACCCTTTACGACCATCTTCATGTGGAAGGACAACCATCATTGCCATGGGAATATAGGCTCAG  
AATTGCAACCGAAACCGCTAGAGCACTTGCTACCTTCACTCGGCAGTATCGTTCCCTATAATCCACAGG  
GATATCAAGTCCCATAACATCCTATTAGATGTCTCACTAACAACAAAAGTGTGAGATTTTGGAGCTTCAA  
GGTGCATTCCTGCTGAACAAAATGGGGTCACAACCGCTATTCAAGGAACACTAGGATACCTAGACCCCAT  
GTACTACTACACAGGACGTCTCACAGAGAAAAGTGATGTTTTAGCTTCGGTGTGTTCTAATAGAGCTA  
CTTACCAGGAAGAAACCATACTCATACAGATCGCTCAGGATGATAGTCTTGTGACATTTCACTGCC  
TACTCACACATGACAACCTTGAGTGACATACTTGATCCTCAGGTGAAGGAAGAGGGAGGCAAAGAGGTGAA  
TGAAGTAGCCGTGTTAGCCGTGGCATGTGTAAAGTTGAAAGCAGATGAACGACCGACTATGAGGCAGGTG  
GAGATGACGCTTGAACCTGTTGATCATCGTTGCTGCGGCAAGAAGTGGTACCTAGTGTGGCCGCGGAAG  
AATCCAAGGAGAAACATGTCTCATGGAGCTATCCGGTAAGCGAGGGCACAAGCATAGAGTCGAGTAGGCA  
ATATAGTAATGATGAAGAATATTTGTTGTCATCGAGGTACCCCTCGATAG

>OsWAK89b >(gi |52077041: <48171-49122, 49225-49365, 49630->50849) *Oryza sativa* (japonica cultivar-group) genomic DNA, chromosome 9, PAC clone: P0635G10

ATGGCGGTGCCTTAGCTATATTGCTCGTTCGGCCTTGCGCCGGCGACACCATTTGTCGTGGCTCAGCAGC  
CGCCGGGATGCCCCCAACGTGCGGGAACATCAGCATCCCTACCCCTTCGGCATCGGCGCCGGCTGCGC  
CCGCGACGAGGGCTTCCAGCTCGAGTGCAACACACCTCTCACCCCACTCCTCATCGTGTCCAATCT  
ACCGGCGGCGGCGACCGGCAACAGCTGCTGAGCTGTCCCTCGCCGACGGCGAGGCCCGCACCTTCTCA  
CCGCGAAACGGCGGTGCTACAACAGCAGCACGGGGACATGGTGAGCGAGAACGATCAGAACGCCACCGA  
GATGTCCCTCTCCGGCACGCCCTACCGTTTCTCAGGTGAGGAACCGCCTCGTTCGCGCTCGGCTGCCCC  
AACCTCGCCTACCTGGTCGACGGCAGGGGCTCCTACATCAGCAGCTGCACGTCCATCTGCCGGACGCCGG  
AGTCGGTGCGCCGGCTCCACGGTGGGCTTACCGGCGAGGGGTGCTGCCAGAGCAGCATACCCTACAG  
CGTCGACGTCTACAAGCCGACATCATCGGCTTCAAGCAAGGCCAAGCTGGGGACTCCGTTCTGCTGAAC  
AGCACGGCGGCTTCTTCATCTTGACAGAGCAGCACGGTTTGCCTGACATGTACCTGGCGGAGGACAGGT  
GGATCGACGCCGCGTACCGCGACGGCGCGCTCGACTTCAACCGCACCGACGACTTCGCCGTGCACGTGCT  
GCTCGACTGGGCGCTCCGGAACGCCGGCAACTGCAGCGCCGCCAGGCGCAACCTCGCCGCGGCCAACTAC  
GCGTGCCGGAGCGCGGACAGCGTGTGCGTCGACACCGGTGACGGCGACGGGTACCGGTGCAACTGCTCCA  
AGGGCTACGAGGGCAACCCCTACCACGATGGCGGGTGCAAGACATCAACGAGTGCAGCGGGCAAAGGA  
GTACCCGTGCTTCCGGCTGTGCATCAACACGCTGGGATCGTACCAGTGCAGCTGCCCGCGGGTACGAT  
GGCAACGCGACCATTCAAACTGGCTGCGTTAAACTAATCAAGCATTAAACCACGGGATCAATTATTGGCA  
TTGGAGTTGGTAGTGGCGCTGGGATTTTGGTCATGGCTCTCGGTGCAACCTTTTAAACATAGGATTAA  
GAATCGGAGAGCAAGAATGCTGAGACAGAAGTTCTTCAACAGAACCGTGGCCATTTGTTGGAACAGTTG  
GTATCTCAAAAGGCTGATATTGCTGAAAGGATGATCATCCCTTTGGCAGAACTGGAGAAGGCCACAACA  
ATTTTGTATGAATCGCGTAAGCTTGAGGAGGAGGGCATGGCACTGTGTACAAAGGGATTTTATCGGATCT  
TCACGTTGTTGCGATCAAGAAATCAAGGTAGCATCCAAAGGAGATTGATGAGTTCAAAACGAGGTA  
GCCATTCTCTCAAAATCAACCATCGTAATGTGGTCAAACCTTTTGGATGTTGCCCTCGAGACAGAAGTGC

# OsWAKs-Supplemental Data 1[1].txt

CATTGTTGGTCTATGAATTTATATCAAATGGTACCCTTTATGACCATCTTCATGTTGAAGGACCAACATC  
ATTGCCATGGGAATATAGGCTTAGAATTACAACCGAAACCGCTAGAGCACTTGCCTACCTTCACTCGGCA  
GTGTCATTCCCTATAATCCACAGGGATATCAAGTCCCATACATCTTATTAGATGGCTCGCTAACAACAA  
AAGTGTCAAGCTTTGGAGCTTCAAGGTGTATTCTGCTGAACAAAATGGGGTCACAACCGCAATTCAAGG  
AACACTAGGATACCTAGACCCCATGTACTACTACACAGGACGTCTCACAGAGAAAAGTGATGTTTTTGT  
TTCGGTGTGTTCTAATAGAGCTACTTACCAGGAAGAAACCATACTCATATAGATCGCCTGAGGATGATA  
GTCTTGTGTCACATTTCACTGCCCTACTCACACATGGCAACTTGGGTGACATACTTGATCCTCAGATGAA  
TGAAGAGGGAGGTAAGAGGTTAAAGAAGTAGCCATGTTAGCCGTGGCATGTGTCAAGTTGAAAGCAGAT  
GAACGACCTACTATGAGGCAGGTGGAGATGACACTTGAAACTATTTCGATCGTCATCACTACAACAAGAAG  
TGGTACCTAGTGTGGCCGCGGAGGAATCCAAGGAGAAACATGTCTCATGGAGCTATCCGGTATGTGAGGG  
CACAAGCATAGAGTCGAGTAGACAATATAGCTATGAGGAAGAGAATTTATTGTCATCGAGGTACCCTCGA  
TAG

>OsWAK90, 4967. t00013, Chromosome 9, pre-processing

ATGGTGATGTTGTTTCCATCGCCGGCGACGGCGGCGTGTGGTGCTGGTGGTGCTGCTG  
CTGCAGCTGCAGCTTTGGTCGGCGGAAGCGCAGGTGGCGGTGGGCTCAGGGCCGCGCGCG  
GGCTGCCCCGACAGGTGCGGCAACGTGAGCGTGCCGTTCCCGTTTGGCATCCGCACCGGC  
TGCTCCCTCGAGGGATTGCGCCTCACCTGCAACACCACGAGCAATCCCCCGCGGCTGATG  
ATCGGCAACAGCACCCCTGCAAGTCGTACGATCTCGCTGGCCAACTCCACGCTGCGCGCC  
GTGCACATCGCCGGCGCGGTGAACATCACGTACGACGTCTGACGCGGAACCCGCGCAAC  
GGCACGTGGGGCGGCGTGGCGCGACCTCAACCAACCCGTACGTCTGCTCGGGGAACTC  
AACCAGCTCCTCGTCACGGCGTGCAACATTCAAGTAACCTTGTGCGCAGCGGCGGCAAC  
GTCATCACCGGCTGCTCTTCTTCTGCTCCATCAACGACAAGTACACGGGTGGCGTGTTT  
AGAAGCCCCGGCAACAAGTGCGCGGGCATCAGTTGCTGCCAGACGCCCATCTCCATCGGC  
CGCCCGTCTACAGCGTGAAAGTGACGATCATGGATAACGAGTACAGAGGTGAGGTGCC  
GAAGCGATCCGCATCGCCGAGCTAGGATGGTTTCGACGGCCTCGCCGCCAACCTGCTCAAG  
AAGCCTGCAGCGAATGACACCTCGCTCCGGACGCGGTCCCGGTGGTGCTGGAGTGGGCG  
GTGGCATCCACCGGCTGGATGTACGCTCGACGCGGGGTGAACAACCAGGCTGCCAAT  
AACTGGTCCTGCCCCACGCGCGGCGAGGCAAGAAGGAGCGCGTGATGAAGCAACAACAGC  
TACTGCCACAACGTACCGACAACCTACCGAAGCGGTTACGTCTGCCGTTGTGACGACGGG  
TACGACGGGAACCCGTACGTGCGCGGCGGATGCCAGGACATCAACGAATGCGAGCGGCCA  
AAGGAGCACGGCTGCTTCGGCGAGTGACCAACACGCGGGGAGCCTTCTTGTCAGATGC  
CCGCACGGTGCCCGTGGTAACCTACAGCATTCCAAATGGCTGCACCAATCCAATCTAGGT  
AACTAAAGTAATCTGCTCATCATTTTTGAATTTATTAGAGATTATTGTATATATAGCTA  
CCTCCTCCGTCTTACAATATACTACTCCCTCCGTCCCTAAATATTTAATGCCGTTGACTT  
TTTAGCACATATTTGACCGTAAGTCTTATTTCAAAAGCTTTTGTGAAATATGTAAACTAT  
ATATATATATATATATATATATATATATAAAAGTATATTTGACAATGAATCAAATGAT  
AGGAAAAATAATTAATAATTAATTAATTTTAAATTAATAAGACAAACGGTTAAACATATTTA  
AAAAAATCAAAGGCGTTAAATATTTAAGAACGGAGGGAGTGATACCTAGCTTTAGCTA  
TAGAAGTGACTAGTGACTGTTCTCTCTTCCAAACAAAGATGCAAACTCTGTTATTCTAAT  
CTACAGGTTAAATGACATTAACCTCTGATGAGAGAACTTCCTTTTCTATTGTGCTCTTAG  
GTTTAACTATTGGAGTTGGAATTGGTAGTGGTGCCGGCCTTTTTATCCTGGCACTTGGTG  
CTGTCTTTTTAACACGTAAAGATTAAACAACGGAGAGCAAGAACACTAAGACAGAAGTTCT  
TCAAACAGAAACCGTGGCCATTTGTTGCAACAATTGGTATCTCAAAGGCCGACATTGCTG  
AAAGGATGATCATCCCTTGGCAGAACTAGAAAAGGCCACAAATAACTTTGACAATTCGC  
GTGAGCTTGGAGGAGGAGGACATGGCACCGTATACAAAGGTATTCTCTCAGACCTTCATG  
TCGTGCAATCAAGAAATCAAATGTGACAGTCCAAAGGGAGATTGATGAGTTCATAAACG  
AGGTAGCCATTCTATCAAAATCAACCACCGCAATGTGGTGAAACTTTTTGGATGTTGTC  
TTGAGACCGAAGTGCCATTGTTGTTTTATGAATTCATATCAAATGGTACGCTTTATCACC  
ATCTTCATGTTGAAGGACCAACATCATTGCCATGGGAAGATAGGCTCAGAATTGCTACTG  
AAACAGCTAGATCCCTTGCTTACCTTCACTCTGCTGTGTCATTCCCTATAATCCACAGGG  
ATATCAAGTCCATAATATCCTATTGGATGGCTCACTAACGACAAAAGTCTCAGACTTTG  
GAGCTTCAAGGTGTATCCAGCTGAACAAAATGGGGTTACAACCTGCTATTCAAGGAACAC  
TAGGATACCTAGATCCCATTACTACTACACAGGACGTCTCACGGAGAAGAGTGATATTT  
ATAGCTTTGGAGTTGTTTTAATGGAGTTGCTTACTAGGAAAAAACCACTCATATAGAT  
CGGCTGAGGATGAGAGCCTTGTGTCACATTTCACTACCCTACATGCACATGGCAACTTGG  
GTGACATATTTGATGCGCAGGTTATGGAGGAGGGGAAAAAGGAAGTTAATGAAGTAGCCG  
TATTAGCTGTGGCATGTGTCAAGTTAAAGCAGAAGAGCGACCGACTATGAGACAGGTGG  
AAATGACACTCGAGAGCATTGATCATCATCACTGCAGCAAGAAGTATTGCATAGTGTTA  
GCACAAAGAAATCTAAGGAGCTTCATGTCTCATGGAGCCATGCAATAAGTGAGGGTACAA  
GCTTAGATTCAACTAGGCAATATAGTCTCGAAGAAGAGAATTTATTGTCATCAAGGTATC  
CTCGATAG

>OSWAK90, 4967.t00013, Chromosome 9, post-processing  
 ATGGTGATGTTGTTTCCATCGCCGGCGACGGCGGCGCTGCTGGTGCTGGTGGTGCTGCTG  
 CTGCAGCTGCAGCTTTGGTCGGCGGAAGCGCAGGTGGCGGTGGGCTCAGGGCCGCGGCG  
 GGCTGCCCCGACAGGTGCGGCAACGTGAGCGTGCCGTTCCCGTTTGGCATCCGCACCGGC  
 TGCTCCCTCGAGGGATTGCGCCTCACCTGCAACACCACGAGCAATCCCCCGCGGCTGATG  
 ATCGGCAACAGCACCTGCAAGTCGTACGATCTCGCTGGCCAACCTCCACGCTGCGCGCC  
 GTCGACATCGCCGGCGCCGTGAACATCACGTACGACGTGTGTCAGCGGAACCACCGGCAAC  
 GGCACGTGGGGCGGCGTCGCCGCGACCTCAACCAACCCGTACGTCTCTCCGGGGAACCTC  
 AACCAGCTCCTCGTCACGGCGTGCAACATTAGGTAACCCCTTGTGCGCAGCGGCGGCAAC  
 GTCATCACCGGCTGCTCTTCTTCTGCTCCATCAACGACAAGTACACGGGTGGCGTGTTT  
 AGAAGCCCCGGCAACAAGTGCGCGGGCATCAGTTGCTGCCAGACGCCATCTCCATCGGC  
 CGCCCGTCTACAGCGTGAAAGTGACGATCATGGATAACGAGTACAGAGGTGAGGTGCC  
 GAAGCGATCCGCATCGCCGAGCTAGGATGGTTGACCGGCTCGCCGCCAACCTGCTCAAG  
 AAGCCTGCAGCGAATGACACCTCGCTCCGGACGCCGGTCCCGGTGGTGTGGAGTGGGCG  
 GTGGCATCCACCGGCTGGATGTACGCTCGACGCCGGGCTGAACAACCAGGCTGCCAAT  
 AACTGGTCTGCCCCACGCCGGCGAGGCAAGAAGGAGCGCGTGCATAAGCAACAACAGC  
 TACTGCCACAACGTACCGACAACCTACCGAAGCGGTTACGTCTGCCGTTGTGACGACGGG  
 TACGACGGGAACCCGTACGTGCGCGGGCGGATGCCAGGACATCAACGAATGCGAGCGGCCA  
 AAGGAGCAGCGCTGCTTCGGCGAGTGACCAACACGCCGGGAGCCTTCTTGTGAGATGC  
 CCGCAGCGTGCCCGTGGTAACACTACGACATTCCAAATGGCTGCACCAATCCAATCTAGGT  
 TTAACATTGGAGTTGGAATTGGTAGTGGTGCCGGCCTTTTTATCCTGGCACTTGGTGCT  
 GTCTTTTTAACACGTAAGATTAACAACGGAGAGCAAGAACACTAAGACAGAAGTTCTTC  
 AAACAGAACCGTGCCATTTGTTGCAACAATTGGTATCTCAAAAGGCCGACATTGCTGAA  
 AGGATGATCATCCCTTGGCAGAACTAGAAAAGGCCACAAATAACTTTGACAATTCGCGT  
 GAGCTTGGAGGAGGAGGACATGGCACCGTATACAAAGGTATTCTCTCAGACCTTCATGTC  
 GTCGCAATCAAGAAATCAAATGTGACAGTCCAAAGGGAGATTGATGAGTTCATAAACGAG  
 GTAGCCATTCTATCAAAATCAACCACCGCAATGTGGTGAAACTTTTTGGATGTTGTCTT  
 GAGACCGAAGTGCCATTGTTGGTTTATGAATTCATATCAAATGGTACGCTTTATCACCAT  
 CTTTATGTTGAAGGACCAACATCATTGCCATGGGAAGATAGGCTCAGAATTGCTACTGAA  
 ACAGCTAGATCCCTTGCTTACCTTCACTCTGCTGTGTCTATTCCCTATAATCCACAGGGAT  
 ATCAAGTCCCATATATCTATTGGATGGCTCACTAACGACAAAAGTCTCAGACTTTGGA  
 GCTTCAAGGTGTATCCGAGCTGAACAAAATGGGGTTACAAGTCTATTCAAGGAACACTA  
 GGATACCTAGATCCCATGTACTACTACACAGGACGTCTCACGGAGAAGAGTGATATTTAT  
 AGCTTTGGAGTTGTTTTAATGGAGTTGCTTACTAGGAAAAAACCACTCATATAGATCG  
 GCTGAGGATGAGAGCCTTGTGTCACATTTCACTACCCTACATGCACATGGCAACTTGGGT  
 GACATATTTGATGCGCAGGTTATGGAGGAGGGGAAAAAGGAAGTTAATGAAGTAGCCGTA  
 TTAGCTGTGGCATGTGTCAAGTTAAAGCAGAAGAGCGACCGACTATGAGACAGGTGGAA  
 ATGACATCGAGAGGATTTCGATCATCATCACTGCAGCAAGAAGTATTGCATAGTGTAGC  
 ACAAAGAAATCTAAGGAGCTTCATGTCTCATGGAGCCATGCAATAAGTGAGGGTACAAGC  
 TTAGATTCAACTAGGCAATATAGTCTCGAAGAAGAGAACTTGTTATCATCAAGGTATCCT  
 CGATAG

>OsWAK91, 4967.t00014, Chromosome 9, pre-processing  
 ATGGCGATGGCGATGGCGCTGCTGCTGCTGCTTCTGCAGCTGTGGTGGTGGTGAAGCG  
 CAGGTGCGAGCGCCGCCCGCGGCGAGCTGCCCGACAGGTGCGGCGACGTGAGCGTGCCG  
 TACCGGTTCCGCGATCCGCGACGGCTGCCACCTCCCGGGCTTCCGCCTCACCTGCGACGCC  
 ACCCACACCCCGCGCGCCTGATGCTCGGCAACGGCACCTCCAGGTGTCGACATCTCC  
 CTGGCCAACCTCCACCGTGCGCGCCCTCGACCTCGCCGGCGCCGTCAACTTCACTACGAC  
 GTGTGCAAGCTCGCCCCGCGGACGGCACGTGGTCCAGCCTCGGCACCGTCCCGGC  
 GCCGGCCCGTACGTGCTCTCCGAGCAGCGCAACCGGCTCGTCGTACGGGCTGCAACGTC  
 CAGGCCACGCTCGCCGGGAGAACACCAACATCATCGCGGCTGCTCCTCCTTCTGCCCG  
 GTCAGCGAGATGTTACACAGCGTGGCGGCGACCGTCCCGTGTGTCGCCGGCGCGCGCC  
 GACAACGCCACCGATGGCGGCTTCATCTGCTCCGGCACAGCTGCTGCGAGACGCCATC  
 GCCATCGGCGCCCTCTACCTCGTGCAGTTCTCAGCCTTGACCAGAACAGGAGCTC  
 ACCGGCAAGTCCCCGTGCGCATCGCATCGCGAGCGTGGGTGGTTCGAGGGCGTCCG  
 GGCGAGCTGCTCAACACAGCTCCGACTCCGCGCGCCCTCCGGACGCCGGTCCCGGTG  
 GTGCTGGAGTGGGTGGTGTGCGCGACGCTGGAGGCGGTGCTGCAGGGCGTACCGGGCAG  
 TTCGCGACGACCGCAACTGGTGTGCCCCGCGGACGCGGCGAGGAGCGCATGCCGGAGC  
 AGCAACAGCTTCTGCAGCAACGTACCGGCAACTACCGCCGCGGCTACGTGTGAGGTGC  
 CAGCGAGCTACGGCGGGAACCCCTACGTGCGCGGCGGATGCCAAGACATCGACGAGTGC  
 AAGCTGCGCGGGAGGTGCTACGGCGAGTGCACCAACACGCCGGGAGATTACAGTGCCGG  
 TGCCCGCGCGGCGCTCGTGGCGACCCGCGCATTCCAAACGGCTGCGTCAAACTAATCTA

OsWAKs-Supplemental Data 1[1].txt

GGTAACTACACCTACATTTTTCTGCTTTGACATAGTCCAATTTATGCACAGATTTTTCAA  
AGAATGGAAAACTAATCTAGGTAATAAAGTAAATATCCTGCTTTACATTGTCAGTCA  
AATTTATGCAGAGAGCTCTGCAATGTAGTTCTGTTTTATACAGCAGTCTTTCTTTAACTG  
TTCTTCCAAGTACTTGCATCGACTACTCTGTTTTATAGACTGATCTTGCTTTTCTTATT  
AACCAAATGGCTGATAAATTATTTTACTTGATAGTGTAGCTCTGCAATGAACTCTGTT  
TAGTACATCAGTCTTTCTTTAACAGTTCAGTCAAGTACTAGCACCAACTGCTCTGTTTCA  
TAAACACAAGCATACTACTCTGTTTTTTCATAGACTAATCTTTCCATAACGTTGTTTTTC  
TTATTAACCAACTCCCATATTCTAGTTTCATAGGTGAAATATCTACCAACTCTGATGGAGA  
TTTTTGCTTTCTCTTGTTGTGTACCAGGTTTAAAGTGTGGTATTGGAGTTGGCAGTGGAG  
CTGGGCTTTTGGTAATGGGACTGGGCGCTGCCTTTTTTAAACGTAAGGTTAAGAAACAGA  
GAGCAAGAATGCTGAGGCAGAAGTTCTTCAAGCAGAACCAGGTCATTTGTTGCAACAAC  
TAGTGTCTCAGAAGGCTGACATTGCTGAAAGGATGATCATCCCCTTGTCAGAAGTGGAGA  
AGGCCACAAACAATTTTGATAAATCACGTGAGCTTGGAGGAGGGGGGCACGGCACCGTGT  
ACAAAGGGATTTTATCGGATCTTTCATGTTGTGCGGATCAAGAAATCTAAGGAGGCAGTTC  
AAAGAGAGATTGACGAGTTCATAAATGAGGTAGCCATTCTCTCGCAAATCAACCATCGTA  
ATGTGGTCAAACTTTTTGGATGTTGTCTTGAGACAGAAGTGCCATTGCTGGTTTATGAAT  
TCATATCAAATGGTACCCTTTACCACCATCTTTCATGTTGAAGGACCAATGTCATTGCCAT  
GGGAAGATAGGCTCAGAATTGCAACCGAAACCGCTAGAGCACTTGCTACCTTCACTCAG  
CTGTGTGCTTCCCTATAATCCACAGGGATATCAAATCCCATAACATCCTATTAGATGGTT  
CACTAACAACAAAAGTGTCAAATTTTGGAGCTTCAAGGTGCATTCCAGCTGAACAACTG  
GGATAACAACCGTTGTTCAAGGAACACTAGGATATCTGGACCCCATGTACTACTACACAG  
GGCGTCTCACTGAGAAAAGCGATGTTTTAGCTTGGCGTCTGTTCTAATAGAGTTGCTTA  
CTAGGAAGAAACCATACTCATACAGATCGCTGATGATGAAAGTCTTGTAAACATTTTCA  
CTGCCCTACTCACACAAGGCAACTTGGGCGACATACTTGATCCTCAGGTCAAGGAAGAGG  
GAGGCGAAGAAGTTAAAGAGATAGCTGTGTTAGCTGTGGCATGTGCCAAGCTGAAAGTAG  
AGGAGCGGCTACTATGAGGTAG

>OsWAK91 gi |32992375|dbj |AK107166.1| *Oryza sativa* (japonica cultivar-group) cDNA  
clone: 002-124-F08, full insert sequence

ATCATTCAACCACCGGCTATGGCGATGGCGATGGCGATGGCGCTGCTGCTGCTGCTTCTGCAGCTGT  
GGTCGGTGGAAAGCGCAGGTGCGAGCGCCGCGCGCGGAGCTGCCCGGACAGGTGCGGCGACGTGAGCGT  
GCCGTACCGGTTCCGATCCGCGACGGCTGCCACCTCCCGGGCTCCGCTCACCTGCGACGCCACCCAC  
ACCCGCGCGCGCTGATGCTCGGCAACGGCACCTCCAGGTGCTCGACATCTCCCTGGCCAACCTCCCG  
TGCGCGCCCTCGACCTCGCCGCGCGCTCAACTTACCTACGACGTGTGAAGCTCGCCCCAGCGGCAG  
CGGCACGTGGTCCAGCCTCGGCACCGTCCGCGCGCGCGCGCTACGTGCTCTCGAGCAGCGCAACCGG  
CTCGTCTGTCACGGGCTGCAACGTCCAGGCCACGCTCGCCGGGAGAAACCAACATCATCGCGCGCTGCT  
CCTCCTTCTGCCCGGTGAGCGAGATGTTACCAAGCGTGGCGGCGACCGTCCCGTCTGCTCCCGGCGCGG  
CGCCGACCAACCGCACCGGCTTCTATCTGCTCCGGACCAAGTGTGCGAGACGCCCATCGCCATC  
GGCCGCCCCCTCCTACCTCGTGCAGTTCTCAGCCTTGACCAGAACAGGAGCTCACCGGCAAGCTCCCG  
TCGCGGTGCGCATCGCCGAGCGTGGGTGGTTCGAGGGCGTCCGCGGCGAGCTGCTCAACACCAGCTCCGA  
CTCCGCGCGCGCTCCGGACCGCGTCCCGGTGGTGTGAGTGGGTGGTGTGCGCGACGCTGGAGGCG  
GTGCTGCAGGGCGTACCGGGCAGTTCGCGGACGACCGCAACTGGTCTGCCCCGCGGACGCGCGGAGGA  
GCGCATGCCGGAGCAGCAACAGCTTCTGCAGCAACGTACCGGCAACTACCGCGCGGCTACGTGTGCAG  
GTGCCGGCGAGGTACGGCGGGAACCCCTACGTGCGCGGCGGATGCCTAGACATCGACGAGTGAAGCTC  
GCCGGGAGGTGCTACGGCGAGTGACCAACACGCGGGAGATTACAGTGCCGGTGCCGCGCGCGCTC  
GTGGCGACCCGCGCATTCAAACGGCTGCGTCAAACTAATCTAGGTTTAAAGTGTGGTATTGGAGTTGG  
CAGTGGAGCTGGGCTTTTGGTAATGGGACTGGGCGCTGCCTTTTTTAAACGTAAGGTTAAGAAACAGAGA  
GCAAGAATGCTGAGGCAGAAGTTCTTCAAGCAGAACCAGGTCATTTGTTGCAACAACAGTGTCTCAGA  
AGGCTGACATTGCTGAAAGGATGATCATCCCCTTGTCAGAAGTGGAGAAGGCCACAAACAATTTTGATAG  
ATCACGTGAGCTTGGAGGAGGGGGGCACGGCACCGTGTACAAGGGATTTTATCGGATCTTCATGTTGTC  
GCGATCAAGAAATCTAAGGAGGCAGTTCAAAGAGAGATTGACGAGTTCATAAATGAGGTAGCCATTCTCT  
CGCAAATCAACCATCGTAATGTGGTCAAACTTTTTGGATGTTGTCTTGAGACAGAAGTGCCATTGCTGAT  
TTATGAATTCATATCAAATGGTACCCTTTACCACCATCTTTCATGTTGAAGGACCAATGTCATTGCCATGG  
GAAGATAGGCTCAGAATTGCAACCGAAACCGCTAGAGCACTTGCTACCTTCACTCAGCTGTGTGCTTCC  
CTATAATCCACAGGGATATCAAATCCCATAACATCCTATTAGATGGTTCACTAACAACAAAAGTGTCAA  
TTTTGGAGCTTCAAGGTGATCTCAGTGAACAAACTGGGATAACAACCGTTGTTCAAGGAACACTAGGA  
TATCTGGACCCCATGTACTACTACACAGGGCGTCTCACTGAGAAAAGCGATGTTTTAGCTTGGCGTCTG  
TTCTAATAGAGTTGCTTACTAGGAAGAAACCATACTCATACAGATCGCTGATGATGAAAGTCTTGTAAAC  
ACATTTCACTGCCCTACTCACACAAGGCAACTTGGGCGACATACTTGATCCTCAGGTCAAGGAAGAGGGA  
GGCGAAGAAGTTAAAGAGATAGCTGTGTTAGCTGTGGCATGTGCCAAGCTGAAAGTAGAGGAGCGGCCTA  
CTATAGGTAGGTGGAGATGACACTCGAAAGTGTTCGATTGTCATCACAGCAGCAAGAGCATGGTGTGGG  
TGCAAAAGAAATCCAGGGAGAATCATGTCTCTGGAGTACCCGGTAAGTGAGGGTACAAGTACACAATCA  
ACTAGACAATATAGCCTTGAAGAAGAGTATTTGTTGTCATCAAGGTTTCCAGATAATGGATTTTTTTTT

CTGGAGTGGTTTTGGATCAATAGAAAGAGTTGTACAATGTACAAGGCATATGATATGCATGATTTTCAT  
AGCTAAATGTGCACTGTTTTATTGTTCTTCTT

>OsWAK92 9637.t03242, Chromosome 9, pre-processing  
ATGGCGTGGTCAATGCCACCGCTGGCTTTGTTGCGCGCCGTGCTGGCGCTGCAGCAAGCT  
ATCGCCGCCGCCCGCGCGCGGCGGAGACTGCCCGACCACTGCGGCGACGTGGCCGTGCCG  
TTCCCGTTTGGCATCGGCGCGCGGTGCTACCACTTGCCCGGGTTCAACCTCACCTGCGAC  
CGGAGCAGCAGCCCGCCGCGGTGCTCCTCGGCGACGCCCGCGCTTCCAGGTGCTCAAC  
GTCTCCATCGTCAACGCCACGGTGCAGCGCGCGCGCTGCGGCGCATAAACATCACCTAC  
GGCGGCGGGAACACGTGCTCGGCCGACGAGGGACGCGGCGCTTGGCGGGGGCTCGGCGAC  
GGCGGGCCGTTCGCGCTGTCCGAGGATCGCAACGAGCTCGTCTGCTGCTGGGGGTGCGAC  
GTCGTGGCGCTGCTACCGACGGCGGGGGGAGCGGCAACAGCAGCAACGTCAACATCAGC  
GGCTGCGCCTCCTTCTGCCCCGGCACCGACGCCGCGCGGCCAAGCGATCGCCGCCCCAGCG  
GGTCCACGATGTGCTGACCGAGGACAGGCGGTGCACCGGCGTGGCTGCTGCCAGATG  
CCCATCAGCGTGGCGCGGACTCCTACCAAGTGCCTCCTCGCGCGGTCAACCCGAGCCCG  
CCCCAGCCGCCGCCCGCGCAGGGCGCGCGGCGACCCGACGGTGGTGCTCATCGCGGAGCAA  
GGGTGGGTGCGCGAGGCCTCTAGGTCCACCCGAGGCTACCCGCTCCCGGTACCTTCGAC  
GAGACGGCGGTGCCCGTGTGCTGGGGTGGATGATCGCGTGCACCCGCGTGGCGCGCGAC  
GGCAGAGTGCCGCTGAATCGACGTGCCCGCGGACGCCGCGCGCAGCGCCTGCAAGAGC  
AGCCACAGCTCGTGCCGCAACGTCTCCAGCTCCGCGCGCGCGCGGTACGTCTGCGACTGC  
GACGCCGGCTTCCATGGCAACCCCTACCTCGCCACCGGATGCCAAGGTAATAATACATAC  
AGAATTCGATTCCTTTTCTTGTGAATTCGAGCTAATTTGTGTCGATTTGGGCGATTTGCG  
AAGACATCAACGAGTGCGAGCGTGCAGAGGAGCACGGTTGCTTCGCGGAGTGATCAACA  
CGGCCGGATCGTTCCTGTGCCGTGCCCTGCAGGAATGCAAGGCAACTACACCCAACGCA  
ATGGATGTTTCAGACCTCCTCTTCTGCTCGTTCTTCTACAGGTGAGCAATCACACATTC  
ACACAATACTTAATCACAGCTGCAACTTGATTGGTGAAAGAAAAGTTTACAGTAATACTA  
TCTCTGCTCTTACATTCCTTGTCTATCTTCAGGTTTAAGCATCGGTGTGGGTGTCAGTAGT  
CTGCAAGCCTTATACTTATAGTGATCATGGCGATCTTCATCATCCGCAAGCAGAAACGCA  
GGAGGGCCAAGAAGATTAGGCAGAAGTACTTCAAGCAGAATCGTGGGCAGCTACTGCAGC  
AACTGGTAGCTCAGAGGGCTGACATTGCAGAGAGGATGATCATACCGTTGGGTGAGCTCA  
AGAAGGCAACAACTTTGATAGAGCTCGTGAGCTCGGCGCGCGCGGCGCATGGCACCG  
TGTAACAAGGGGATCTTGTCCGATCTCCATGTCTGCGCATCAAGAAATCAAAGATTGCAG  
TTCAAAGGGAGATCGATGAGTTCATAAACGAGGTTGCCATTCTCTCGCAGATAAACCAT  
GGAACGTGGTGAAGCTTTTCGGATGTTGCCTCGAGACAGAAGTGCCATTGCTTGTCTATG  
AGTTCGTTTCCAATGGAACCTTTACAGCCATCTCCATGTCAAGTGACCAAGATCACTAC  
CATGGAGTGACAGATTGAGGATTGCAACTGAGACAGCCAAAGCTATTGCCTATCTGCACT  
CATCAGTTTCAATCCCAATAATCCACAGAGATATCAAGTCCACTAATATACTCCTCGATG  
ACACTCTGACCTCCAAGGTGTCAGACTTTGGAGCTTCAAGATGTATCCCGGTTGATCAAA  
CAGGGGTAACAACAAAGGTTTCAAGGAACCTTAGGATACATGGATCCGGCATACTATTACA  
CTCAGAGGCTTACAGAAAAGAGCGACGTGTACAGCTTCGGGGTCATTCTTGTAGAGCTTC  
TCACAAGGAAGAAGCCATTTTCTCACCTGACACCTGAGGGTGAAGGTCTGGTTGCACATT  
TTGTCACTTCATTTACAGAAGGCAATCTAGTTGGAGTGTTAGACCTGCAATCATGGAGG  
AGGCAGACATGAAAGTTGTGAAGTAGTAGCTACGCTAGCTGTGACATGTGTAATCTGA  
GAGGAGAGGACCGGCTACCATGAGACAGGTTGAGATGGCACTTGAAGGCATTGAGGCAT  
CCAGGGAAAATGTTTCAGGTAATCTTTCTGCAGAGAAGCTTGGAGAGAGCAATAATGTCG  
CGAGGGATTTTCATGCCAAGCCAAGAAGGAAGAAGCATGACAGAAGGGACTAGGCAATATA  
GTTTGGAAGAAGAGTTCTTGTGCTTCAAGGTACCCTCGGTAG

>OsWAK92 gi|32987911|dbj|AK102702.1| Oryza sativa (japonica cultivar-group) cDNA  
clone: J033103N20, full insert sequence

GAGTCGGCCATGCTGCCTTGATGATCGATCGATGCAAAGGCAGGCAGGAGGATTCATTTCCATGGCGTGG  
TCAATGCCACCGCTGGCTTTGTTGCGCGCCGTGCTGGCGCTGCAGCAAGCTATCGCCGCCGCCGCGGCGG  
CCGGAGACTGCCCGACCACTGCGGCGACGTGGCCGTGCCGTTCCCGTTTCGGCATCGGCGCCGGCTGCTA  
CCACTTGCCCGGGTTCAACCTACCTCGCAGCCGAGCAGCAGCCGCCCGCGGTGCTCCTCGGCGACGCC  
GCCCGTTCAGGTGCTCAACGTCTCCATCGTCAACGCCACGGTGCAGCGCCGCCCGCGTGGCGGCATAA  
ACATCACCTACGGCGGCGGGAACACGTGCTCGGCCGACGAGGGACGCGGCGCTTGGCGGGGGCTCGGCGA  
CGGCGGGCGGTTTCGCGCTGTCCGAGGATCGCAACGAGCTCGTCTGCTGCTGGGGGTGCGACGTGCTGGCG  
CTGCTCACCGACGGCGGGGGGAGCGGCAACAGCAGCAACGTCAACATCAGCGGCTGCGCCTCCTTCTGCC  
CCGGCACCGACGCCGGCGGCAAGCGATCGCCGCCCGAGCGGGTTCACGATGTGCTGACCGAGGACAG  
CGCGTGACCGCGTGGCTGCTGCCAGATGCCCATCAGCGTGGCGCGGACTCCTACCAAGTGCGTCTC  
CGCCGCTCAACCGAGCCCGCCCGCCGCGCGCGGCGAGGGCGCGGCGACCCGACGGTGGTGCTCA  
TCGCGGAGCAAGGGTGGGTGCGCGAGGCCTCTAGGTCCACCCGAGGCTACCCGCTCCCGGTACCTTCGA



# OsWAKs-Supplemental Data 1[1].txt

CGAGACGGCGGTGCCCGTGTGGTGGGGTGGATGATCGCGTTCGACCCGCGTCCGGCGCCGACGGCGAGGTG  
CCGGTGGACTCGAGCTGCCCGCGCGCGGCTACGTCTGCGACTGCGACGCGGCTTCCATGGCAACCCCTACCT  
ACGTCTCCAGTCCGCGCGCGCGGCTACGTCTGCGACTGCGACGCGGCTTCCATGGCAACCCCTACCT  
CGCCACCGGATGCCAAGACATCAACGAGTGCAGCGTGCAGAGGAGCACGGTTGCTTCGGCGAGTGCATC  
AACACGGCCGGATCGTTCTGTGCCGTGCCCTGCAGGAATGCAAGGCAACTACACCCAACGCAATGGAT  
GTTTCAGACCTCCTCTTCTGCTCGTTCTTCTACAGGTTTAAGCATCGGTGTGGGTGTCAGTAGTGCTGC  
AAGCCTTATACTTATAGTGATCATGGCGATCTTCATCATCCGCAAGCAGAAACGCAGGAGGGCCAAGAAG  
ATTAGGCAGAAGTACTTCAAGCAGAATCGTGGGCAGTACTGCAGCAACTGGTAGCTCAGAGGGCTGACA  
TTGCAGAGAGGATGATCATACCGTTGGGTGAGCTCAAGAAGGCAACAAACAACCTTTGATAGAGCTCGTGA  
GCTCGGCGCGCGCGGCCATGGCACCGTGTACAAGGGGATCTTGTCCGATCTCCATGTGCTCGCCATCAAG  
AAATCAAAGATTGCAGTTCAAAGGGAGATCGATGAGTTCATAAACGAGGTTGCCATTCTCTCGCAGATAA  
ACCATAGGAACGTGGTGAAGCTTTTCGGATGTTGCCTCGAGACAGAAGTGCCATTGCTTGTCTATGAGTT  
CGTTTCCAATGGAACCTTTACAGCCATCTCCATGTGAGTGGACCAAGATCACTACCATGGAGTGACAGA  
TTGAGGATTGCAACTGAGACAGCCAAAGCTATTGCCTATCTGCACTCATCAGTTTCAATCCCAATAATCC  
ACAGAGATATCAAGTCCACTAATATACTCCTCGATGACACTCTGACCTCCAAGGTGTCAGACTTTGGAGC  
TTCAAGATGTATCCCGGTTGATCAAACAGGGGTAACAACAAGGTTTCAGGGAACCTTAGGATACATGGAT  
CCGGCATACTATTACACTCAGAGGCTTACAGAAAAGAGCGACGTGTACAGCTTCGGGGTCATTCTTGTAG  
AGCTTCTCACAAGGAAGAAGCCATTTTCTCACCTGACACCTGAGGGTGAAGGTCTGGTTGCACATTTTGT  
CACTTCATTTACAGAAGGCAATCTAGTTGGAGTGTAGACCTGCAATCATGGAGGAGGCAGACATGAAA  
GTTGTGCAAGTAGTAGCTACGTAGCTGTGACATGTGTAATCTGAGAGGAGAGGACCGGCCTACCATGA  
GACAGGTTGAGATGGCACTTGAAGGCATTAGGCATCCAGGGAATAATGTTTCAGGTAATCTTTCTGCAGA  
GAAGCTTGGAGAGAGCAATAATGTGCGGAGGGATTTTCATGCCAAGCCAAGAAGGAAGAAGCATGACAGAA  
GGGACTAGGCAATATAGTTTGAAGAAGAGTTCTTGTGTTCTTCAAGGTACCCTCGGTAGTTTTCTGGTC  
ATCTGTGTTTCATGTAAAGCTGATTTTCAGTTTCATTTTTCCCAAGGAGTTTATGTGTTCTTTAAAGAATT  
GAAATTACCCTCATTGAGTTAAAAACAATGGGCCATGACATGCTTCTC

>OsWAK93, gi |19511099, mRNA, Chromosome 10

ATGATTTTTTCCAAAGATGAGCTAAAAAAGATCACAAGAACAATTCAGAGGTTCTTGGTCAAGGAGGCT  
TTGGTAAGGTATACAAGGGGACTCTTGGAGATAATACTATTGTGCTGTGAAGACCTCAATTGAGGTAAA  
TGAAGCACGAAAGGATGATTTTCAAAATGAGGTGGATGTTCCGATGTTGGTATATGAATTTGCGGCTAAT  
GGCAATCTGCAAGATATTCTCCATGGTGTGGAATATCCCTCTACCATTACACTTACGCCTAGACATTG  
CAATTGAATCTGCCGAAGGTCTAAGATACATGCACTCTCAACTAATCGTACCATACGACATGGCGATGT  
CAAAACGACCAACATACTTCTAACGGATAAGTTTCATCCCTAAGATATCAGACTTTGGAACCTTCAAGCTT  
CTTACTGTAGACAAAGACTTTACCATGTTTGTGGTAGGAAGCATGGGCTACATAGACCCAGTGTTCATA  
AGACTGGTCATTTAACACAGAAGAGTGATGTGTATAGCTTTGGAGTTGTACTACTTGAACCTCATAAGTAG  
AAAGCCAACAATATATGGTGAAAATTGTAGCCTGATCATTGAGTTCCAGAAGTCTACGATAAAGAGAAT  
AGTGGGAGAATGATGTTGACAAGGATATTGAAATGAAGAAGACATCCTCATCCTTGAAGAAATTGGCA  
GGCTGGCAATGGAGTGTTTGAAGAAAAGTTGAAGAAGCAGCTGATATGAAGGAGGAAGAAGCAAGAT  
GAAGAACAAGCACTACAATGTCATCGTCTTCCCTAAGCGAAAGAAGAAACAAAAGAGAAAGGAGAT  
GGGCGCGGATTCTCTGGTGACCAACAGCGGCGAGAGTTCGGTTAAAGTTTGCACCTAACGACCGTCAAC  
AACACCGCAACACTTATCCTTTACTTGTCCCTGAGTAA

>OsWAK94, gi |19511100, mRNA Chromosome 10

ATGGCGTTGAGGCGAGTAGCAGTAGCAGGGGCCCTGCTGCTGCTTGTGGTTGTGGGTTCTTCCGCCGCCG  
GTGCCGGTAGTGGCAGCTGCCAGACAAGGTGCGGCGACGTGGACATCCCGTACCCATTGCGCATCGGCCC  
CAACTGCTCCCGCGGCGTTGGGTTTGAATCGAGTGAATACGAGGAACGGCAGCGGCGACTTGGTGCCG  
ACCCTGGCGGCCACCAGCTTGAAGCATCGTGCAGAACCTGTGCGTGGAGTCGCCTCCAATGGCGAAGGTGA  
TGCTGCCGGTGGCATAACAAGTGCTACGACGACCCAACAAAACCCAAGATTTCAACGGCGAGGTAGAGCT  
GAACAAGACCGGCGTGTACCGCATCTCCGATGAGCTGAACATGCTGGTGTCTCTGGCTGCAACACCATG  
GTGTAAACCAAGAACGGCAACAGTGAGGGCGGCTATACCCGTACCTCTACTACACCGGCTGCATCGCCT  
ACTGCAACGACTCCAGGAGCGCAACAAGACGGCAAGTGCGCGGTGCCGGCTGCTGCCATGTGACATCCC  
CGGTGGCCTCACCGACAACACCCTCGTCTTCTGACTCGTGGAACCGTACCAAGTAG

>OSWAK95, 3135.t00009, Chromosome 10, pre-processing

ATGGCATCGTTGCGGCTATTGGCCGGAGTGCTGCTCATTCTGATGTCCTCCGCGCGCGT  
GGCATCGCGCGCGGCGCTGCCGGCTGCCAGGCGAGGTGCGGCGACGTGACATTCCATAC  
CCGTTCCGCATCGGCGGCGGCTGCTTCCGCGAGCGCGGCTTCGAGATCGCTTGCAACACA  
AGCAACGGCGGCTTGGTGCCACCCCTCGCCGCGGCCAACGACACCATCCAGGTGCAGAAT  
CTGACGGTGTTCACGCGCGGAGGTGAAGGTGATGCTGCCGGTGGCGTACAGGTGCTAC  
AACTCCAGCGGCAACGTACCGAGCAGTTCTACGGCGACGTGGAGCTGAACAAGACCGGC  
GTGTACCGCATCTCCAGAGCGCAACAGTTCTGTCGTCCTGGGATGCAACACCGTGGCA  
TGGAACAAGCACGGGGACAGCGAGGGAAAAGGCCTCTACACAAGCCTCTACTACGCCGGC

OsWAKs-Supplemental Data 1[1].txt

TGCGTCACTACTGCAGCGACTCGCTGAGCGCCAAGAACGGCAAGTGCGCCGGCGTCCGG  
TGCTGCCACGTGACATCCCGCCGGAGCTCACCGACAACGTCGTACCTTCCAGCAATGG  
CCGCGCGGCGAACAGGTGGACTTCAGCCCTGCGACTACGCCTTCTCGTCGACAAGGAA  
GAGTACCAATTCCAGAGGTCTGATCTCAACATGGACCGGAAACAGAGGATGCCGGTGTGG  
CTGGACTGGGCCATCCGCGACGTGGCGTCTGCCCGGCGCCGGAGGTGGAGACGTGGAAG  
AAGAATATGCCAGCTGGATACGCCTGCGTGAGCGTCAACAGCACGTGCGTCAACTCCACC  
AACGGCCTCGGATACTACTGCAACTGCAGCAGTGGCTACGAGGGTAACCCCTTACGACGAC  
GATCCCAATAAAGGATGCAAAGGTAACCTACTACCTTAATTCTTTAATATGTGACATATAT  
AGTTTTAAACTTAGGACAACAATATTTATTTAATTACTTGGTTAATTAAGGTTAGAAGATT  
TGGAATATTATATATATATTGAGATATATATCAACTAAAATACTTTAAGCATACATACCT  
AGTATTAATTTTCTCCATTTGCACAATTTTTTATGAACTGCAAAATAGTCAAACAAATTA  
TTAAAGACAACATACATATCATATATAAAAAACAGCAATGGTTTAACCATATATGGAATCT  
CGTACTGCCTCTAGAGGCCAAAATTAACCTTTATATTCTGAATAAATCTGCAGACATCGAT  
GAGTGCACACACCCCAACAAGTATCCTTGCCACGGTGTCTGTAGGAACACTCCAGGAGAT  
TACGAGTGCCGCTGCCACACGGGTACCAGCCAAGTGGTGATGGTCCAAAGAAAACAGGAG  
TGCAGTTCAAAATTTCTTTTCCAGCACGGCTTGCTGTTGGTATTTGCCTTCAACATACT  
TTTTAAGTATAAATTGCATTTCGTATCACAATAATTAATCCCTCCGTATTTTTATTTTAA  
TTTTAATGTATGACGCCGTTGATTTTTCGACCAACGTTGACCATTGTTTTATTCAAAAT  
TTTTATGCAAAATATAAAATGTTTATATCATGCTTAAAGAATATTTGATGATGAATCAAG  
TCACATTAATAAATAATGATAATTACATAAATTTTTGAATAAGACGAATGGTCAAACGTT  
AGACAAAAAGTTAACGACATTATACATTAATAATATAGAGGTAGTACCTTATTTCACTAAT  
ACCTTCGTGATGATAGGCTTTCCATTACAGATAACGTGTATTGAAATAATTTTCAGCTAA  
CACGTACGTATCATACACCATTAAATCAACATACAGAAATTTTCATGAAAAAATGATCTAA  
CTTCATGGAGTATCATGGATTCCGCTTATGCTTTACAAGATGTCCACACATTCAGTGAC  
ATAAACCTAGTACAAAGTAAAATTTATCCCAATATACCATGTTGTAAGTGATGACATGTA  
CTAAATTTGGTGTAAGTGAACAAGGAAAACCTGACCTAGTGTAACACGGAATTCACCC  
AACTACTTTCCATTAATTTTTTTTATTTAATTTGAAATGTTTACAAGTGCTCAAGAGATT  
CAATGCAATGGGCATACCTATACTTTCTATAAAGTTATAGCCCACTAAATCTAAAGCTCA  
AGATGCAACCATGCCACATCATAACTCACTAGCAATAATTACATATTTAACATCATGCAA  
GCATACAACATCAATTTACAATTTATTTAATTTCTACAAATCAATATGCAAGCATATCCAA  
TCATACCCCTCACATCATTTGCATTATATTTTAAACAATCTATCTATCATTTTTTATAAT  
ATTTAACATATACTTATCAATATGTTTACATTAAGCGTGGGTATCATTTGTTTATTTT  
ATGGTACATGTTTCATTATTTTTTCTTTTCACTCCTAGCTTGATTGTCAAAAAAAAAT  
ATATTGAGAATTACTTAGTAATTTCCACAGCAAAGCGCGGGGATCACCTAGTTACAATGA  
AAGTAAAGTATATGGGTGGTCCGTAAACTTGTGTGGGTGGGTGTCAGGTCCTTGAACCTC  
TCAAAATATATTTTACGTTGTGCAACTTGTCTTGGGTGGGGTGTCTACTTATCCAAAT  
AGGCTCCGACACACTCCATGCGCCAATGTGGAATGCCATAGTGGCACCTACATGTTAGTA  
GCTTGGAAACCATATGTCAGTCACATATAAAAAAATTAATAACAGTTTTTCTCTTGG  
GTAGAGAGGAGAAAAGATAAAGTAAATAAAAAATTTCTAAGGTAGAGAGGAGAAAATATGT  
TCTTTTTATTTTTACTTTTTTCAATGTGTCTGGCATGTGGGTCTCACTAACATGTAGGTG  
CCGCCATGGCATGTCACGTCAATGTACATTGTGGATTGGATTCCGTTTGGATATATATGA  
CTACCAAGACAAGTTCGGGGACCTGAAAAATACATTTTAAGAGTTAAGAAGTATGATGAC  
ACACCTGCACAAGTTTAGGGATTGCCCATGCACTTCACTCTACAATGAAATTAGTTATGA  
AAGTTGCTAGACAAAATGTTATGTGCTCTCAAGTCTTTATTTATTGAATCCCTACATG  
GGGGATAAAGCAAGAGAATAAAGGAGAAGAGGAAATAGAGAAAAATGGAAGGAGAGAAAA  
ACATTACTCCCTCCGTCCCAAAATATAAGCATTTTTTAGCATAGTGTCAAGTCAAATATTT  
GTAACCTTTGACTATTAATAGCAAAAAATATAAAAAAGATCAGTTATGTAACATTGATGTTA  
TTAGATTTATCATTAACAAACTATCACAATATGTAATTCCTTTTATTTAAACATCTTA  
CTTTTATAAATATCATTTGGTCAAAGTAGCATATCGAAGACCATGTGGAAGTCCAAAAGTG  
CTTATATTTTGGGACGGAGGGAGTAGAACATTTCTGAGGTTGATGATCTCTAATAAACTC  
TTGAGCAACTAGAAAACGGAATTTAGAGTGTACAACAAAACCTTTAGCAAGACTTTATA  
TAGTATTGAAAACTAAAATTTCAAAAACTAAGACATGATAGAGGCCAATGATTTGAGGT  
TTTCTCATACTAGTTTTCTTATATCCTTGGAGAGACATATATTGGCCCCTAGCTTGCTA  
CATGCTGTGGCAAAATGTTACGCCATGTGTAAATAATTGTTGAGCTAAACATGAATGTTG  
TACATGCATAATGTTAATGATATGATCATCCAGCTTATGACAAGATTATCCAAGTGAGC  
ATTATTTGCTTCACTTTAGATTATAAATGGAATTTCAATTCATTGATTGGCTCACATG  
AATTTATGATCTTTGTAGGTATCACTTTAGGATTATCCTTCCTGATTGTTGTTGTTCTTT  
TCACACTAATGATGCTTCAAAAGAGAAAAATGAACAAATATTTCAAGAAGAATGGTGGTT  
CAGTATTACAGAAAGTGACAATATCATGATTTTCTCAAAGATGAGGTTAAGAAAAATCC  
TAAAGAACAATTCTGATATTATTGGTGAAGGAGGATTTGGTAAGGTTTACAAAGGGAGAC  
TAAAGATGATAACCTGGTGGCTGTGAAGACTTCCATTGAGGTAATGAAGCTCGAAAAG  
AGGATTTACAAACGAAGTTATCATACAATCGCAAATGATGCACAATAACATTATCAAGC  
TTTTGGGTTGCTGCTTGAAGTGGATGTTCCAATGTTAGTGACGAGTTTGCCGCTAATG

OsWAKs-Supplemental Data 1[1].txt

GCAGTCTCAAAGACATTCTCCATGGTGATGCGAATCGTCTAGTTCCTCTATCACTAGACC  
TACGCCTAGATATTGCAGTTCAATCTGCAGAAGGTCTAAGGTACATGCACTCGTCCATAA  
GTCATACCATACGACACGGTGATATTAAGCCAGCTAACATACTTCTAACTGATAAGTTCA  
TTGCGAAGATCTCAGACTTTGGAACATCCAAGCTTCTTACTGCAGACAAAGAATTTACCA  
TGGTTGTGGCAGGGAGCATGGGCTACATAGACCCAATCTTCTATATGACTGGTCATTTAA  
CACAGAAGAGTGATGTATATAGTTTTGGAGTTGTGTTGTTGGAGCTCATTAGCAGAAAGC  
CAACAATATATGACAAGAATATAGCCTTGTCTATTGAGTTCCAAAAGGCGTATGATCGAG  
AAAATAGTGGGAGAGCATTGTTTGATAAGGAGATTGCAATTGAAGAAGATGTCTTGATCT  
TAGAAGAAATTTGGTAGGTTGGCAATGGATTGTTTTAAAAGAAAAGATTGAGGAACGACCTG  
ATATGAAGGAGGTAGCTGCACGGCTTATGATGCTGCGAAGATCTAGAAACCTTGGACAAG  
AAAACCTACAATGTAAGTCTCAACAGTACTTTGAGGAGATTAGTATCGAGGAAAATTGCA  
AGAGCTTTGATGCTGATATCGGAACAAGTAGCAGCACAACGCTTCTTTTGCATTGAGTTT  
AGTAGCAACGAACCTCTCTAGCCCATAGACTGAGAATTGGAAGAGAAGAGGGTTAATAAGC  
AATGTATATCTTTTTTTTTTGTGTGACCTACTTTGTCAATCAATTTCTTTTCATTTGAAAT  
AGAGTGATTCAAAGCATGTATTTCTTGTTTATGTTGTTTGTAAATTTAAAGCAGAGAAAACA  
ACATGTGTATAGTACATGATTGTGCAATACTGCAATCTATACAATAGTGTCAAAGCTCTT  
GTCGTGTTTTCTACTGTTGCGTCTATCGGAGCATGTGATGTAGAAGTCTTCCGTATATAT  
GAATATACCGCACTATTTCTTGCTATGTATACAGTAAACACTTTGTTGACAAGGTATACA  
AGAATAATACTCCTATTTGATTTGCAACCATATTAATTAATGTATGTGTGGCCAATTTA  
TTTTATCCTTGCTAAATTTGGTTGTGCATGTAGCCTTGCTTCGGTCCACCGAGACGATGGGT  
ATGTCGCCCTCCTCGGAGGTGCTTGACGCACCAACCGGCCCAAGACTCTGAGCCTTCAT  
CTGCTGCACGCAAGCAGCCTCCATGGCCCTCAGGTTGCGCCGATCAATGAGGAGAGCCAA  
ATTTATGATTTTACCCTCCCACACCTTATTTTAGTGGGCAAGTATACCCCTCCTTAATTT  
ACTACCACTAATTAAGTGGTAGTATGAAAAAATACGATCCCTTGATGAGAAAAGATGA  
AGGGTTGAGATAAACTTCTACTACCAAGTAAAGAGCACCATAGTATGATTCTTCCCATAGA  
ATGCAAGGGCGGTCTTACTGCCGTTGTGTGGCCGAATAGACTAGAGGGTGAATATGGTG  
TTTCGGCAGTCAGACCCAGCGTCCGAGTCCGAGTCCAATTAAGAGAGTTCTCATGTTTCCT  
TACTTGGGCTCGAGGTTTATTGAATTCTAATTGATCTCTAATGCAATAGGACATGGAGA  
AGGCCCTCTGAAGGCAAGACCAACCCCTTTATAAGGGCTATGGCTGATTCAATTCTAACC  
CCTGACCATACCCCTACACAATTAATTGAATCGTTCTTTTACTTTTACTTTTACTATTA  
CTTTTCAGCCATATTTTCTACTTTATCGTAGTTTCATCTACCTTTGTTGATTTGCACCAT  
AAATCTTTTTGCCTTCACTGCAACAGTGAATACACTTCGTAGGTGTTATGGTCCAATGCC  
CATGGACAGTAGGCTTGTTCCCTAAATCTTCTATTTCGCTCACGGAAGGGTGTCTAGCTT  
GAAATCGATCAAAATCAGCCTAGAGGCTGGTTTGATTTCTAAATTGCCTCCGATAACTGG  
TTTTGATCTTTCTAAACCCATCTTGGTCAAGAGATTTTCTAAATCGAGATTGTTGGAGGT  
ATACCACGAAGGGCTTCGGCCGGACTTGCCGAAACCAAGAATTTGGGCAACAGGCTCAG  
ACCGGAGGCAAGCGGTGAAGGTGAGAGAAAACCATATGGGCGAAAGCCACAGGGTGAA  
AGCCGTGGCAAGGCATTACAGGGCCTCACCAGTCAAGGACCTCATCGGAGGGCCTCACG  
GGCGGAGACGGTGAGGCAAAAGCCTCGGCGCAAGGCACGGGCTTCGCCAAGTACCAAAC  
CCCACCGTGA

>OsWAK95, 3135.t00009, Chromosome 10, post-processing  
ATGGCATCGTTGCGGCTATTGGCCGGAGTGCTGCTCATTCTGATGTCTCCGCCGCCGTG  
GGCATCGCCGGCCGGCTGCGGCTGCCAGGCGAGGTGCGGCGACGTCGACATTCCATAC  
CCGTTCCGGCATCGGCGGCGGCTGCTTCCGCGAGCGCGGCTTCGAGATCGCTTGCAACACA  
AGCAACGGCGGCTTGGTGCCACCCCTCGCCGCCGCAACGACACCATCCAGGTGCAGAAT  
CTGACGGTGTTCCACGGCCGGAGGTGAAGGTGATGCTGCCGGTGGCGTACAGGTGCTAC  
AACTCCAGCGGCAACGTACCGGAGCAGTTCTACGGCGACGTGGAGCTGAACAAGACCGGC  
GTGTACCGCATCTCCGACGAGCGCAACAAGTTCTGCTGCTCTGGGATGCAACACCGTGGCA  
TGGAACAAGCACGGGGACAGCGAGGAAAAGGCCTCTACACAAGCCTCTACTACGCCGGC  
TGCGTCACTACTGCAGCGACTCGCTGAGCGCCAAGAACGGCAAGTGCGCCGGCGTCCGGC  
TGCTGCCACGTGACATCCCGCCGGAGCTCACCGACAACGTGCTCACCTTCCAGCAATGG  
CCGCGCGGCGAACAGGTGGACTTCAGCCCCTGCGACTACGCCTTCTCGTGCACAAGGAA  
GAGTACCAATTCCAGAGGTCTGATCTCAACATGGACCGGAAACAGAGGATGCCGGTGTGG  
CTGGACTGGGCCATCCGCGACGTGGCGTCTGCCCCGGCGCGGAGGTGGAGACGTGGAAG  
AAGAATATGCCAGTGGATGATCGCTGAGCGTCAACAGCACGTGCGTCAACTCCACC  
AACGGCCTCGGATACTACTGCAACTGCAGCAGTGGCTACGAGGGTAACCTTACGACGAC  
GATCCCAATAAAGGATGCAAGACATCGATGAGTGCGCACACCCCAACAAGTATCCTTGC  
CACGGTGTCTGTAGGAACACTCCAGGAGATTACGAGTGCCGCTGCCACACGGGTTACCAG  
CCAAGTGGTGATGGTCCAAAGAAACAGGAGTGACAGTTCAAAATTTCTTTTCCAGCACGG  
CTTGCTGTTTGGTACTTTTAGGATTATCCTTCTGATTGTTGTTGTTCTTTTCACTA  
ATGATGCTTCAAAGAGAAAATGAACAAATATTTCAAGAAGAATGGTGGTTCAGTATTA  
CAGAAAGTGACAATATCATGATTTTCTCAAAGATGAGGTTAAGAAAATCCTAAAGAAC

OsWAKs-Supplemental Data 1[1].txt

AATTCTGATATTATTGGTGAAGGAGGATTTGGTAAGGTTTACAAAGGGAGACTAAAAGAT  
GATACCCTGGTGGCTGTGAAGACTTCCATTGAGGTAATGAAGCTCGAAAAGAGGATTTT  
ACAAACGAAGTTATCATACAATCGCAAATGATGCACAATAACATTATCAAGCTTTTGGGT  
TGCTGCTTGGGAAGTGGATGTTCCAATGTTAGTGACGAGTTTGCCGCTAATGGCAGTCTC  
AAAGACATTCTCCATGGTGATGCGAATCGTCTAGTTCCTCTATCACTAGACCTACGCCTA  
GATATTGCAGTTCAATCTGCAGAAGGTCTAAGGTACATGCACTCGTCCATAAGTCATACC  
ATACGACACGGTGATATTAAGCCAGCTAACATACTTCTAACTGATAAGTTTCATTGCGAAG  
ATCTCAGACTTTGGAACATCCAAGCTTCTTACTGCAGACAAAGAATTTACCATGGTTGTG  
GCAGGGAGCATGGGCTACATAGACCCAATCTTCTATATGACTGGTCATTTAACACAGAAG  
AGTGATGTATATAGTTTTGGAGTTGTGTTGTTGGAGCTCATTAGCAGAAAGCCAACAATA  
TATGACAAGAACTATAGCCTTGTCTATTGAGTTCCAAAAGGCGTATGATCGAGAAAATAGT  
GGGAGAGCATTGTTTGATAAGGAGATTGCAATTGAAGAAGATGTCTTGATCTTAGAAGAA  
ATTGGTAGGTTGGCAATGGATTGTTTAAAAGAAAAGATTGAGGAACGACCTGATATGAAG  
GAGGTAGCTGCACGGCTTATGATGCTGCGAAGATCTAGAAACCTTGGACAAGAAAACCTAC  
AATAGATTTTCTAAATCGAGATTGTTGGAGGTATACCACGAAGGGCCTTCGGCCGGACTT  
GCCGAAACCAAGAAGCTTGGGCAACAGGCTCAGACCGGAGGCAAGCGGTGAAGGTGAGAA  
GAAAACCATATGGGCGAAAGCCACAGGGTGAAAGCCGTGGCAAGGCATTACACGGGCCTC  
ACCAGTCAAGGACCTCATCGGAGGGCCTCACGGGCGGAGACGGTGAGGCAAAAGCCTCGG  
CGCAAGGCACGGGCTTCGCCAAGTACCAACCCACCGTGA

>OsWAK96, 3135.t00011, Chromosome 10, pre-processing  
ATGGCGTTTCTGGCTAATTGCCGCCGGCGGCCTGCTGCTTCTTCTCCGTTTCGCTTTCCGCC  
GCCGACGGAATCACCGGCTGCCCGGATAGGTGCGGCGACGTCGATATCCCTTATCCATT  
GGCATCGGCCCAACTGCTCCCGCGGGGACGGCTTCGACATCGCCTGCAACACCACCAAC  
AGCACCGGTGTCCTAGTGCCCAACCTCGCCGCCGCCGCCGCCATGCCATCCAGGTCCAG  
AAGCTGACGGTGTTCCCGCGGCCGGAGGTGAAGTGATGCTGCCGGTGGCGTACACGTGC  
TACAACCTCCGGCGGCAACGTCAACAGGCAAGTTCGACGGCGACGTGGAGCTCAACAACGAG  
GGCGTGTACCGCATCTCCGACGAGCGCAACATGTTCTGTCGTCATCGGCTGCAACACCGTG  
GCGTGGAACAGCACGGGGACAGCGGTGGCAAAGGCCTCTACCGCAACCTCTACTACGCC  
GGCTGTGTACCTACTGCAGCGACTCGCGGAGCGCCATGGACGGCAAGTGCGCCGGCGTC  
GGCTGCTGCCACGTGACATCCCGCCGGAGCTCACCAGCAACGTGCTCTACTTCGAGCAA  
TGGCCGCGCGGCAACAGGTGGACTTCAGCCCCTGCGACTATGCCTTCTCGTCGACAAG  
GAGGAGTACCGATTCCGGAGGTGCGATCTCAAAATGGAGTTGAACCGGAGGATGCCGGTG  
TGGCTAGACTGGGCCATCCGTGACCGCCGCGGCAACGACTCCTCCGTGGCGTCTGCCCG  
GCGCCGGAGGTGGAGAAGAAGAAGCCGGCCGGGTATGCCTGTGTGAGCGCAACAGCGAG  
TGCGTCAACTCCACCAATGGCCCGGGATACTACTGCAATTGCAGCAATGGTTACGAGGGT  
AATCCCTACGACAACGATGGATGCCAGGTAAGAATGTTTGCTCATGCATTTAA

>OsWAK96, 3135.t00011, Chromosome 10, post-processing  
ATGGCGTTTCTGGCTAATTGCCGCCGGCGGCCTGCTGCTTCTTCTCCGTTTCGCTTTCCGCC  
GCCGACGGAATCACCGGCTGCCCGGATAGGTGCGGCGACGTCGATATCCCTTATCCATT  
GGCATCGGCCCAACTGCTCCCGCGGGGACGGCTTCGACATCGCCTGCAACACCACCAAC  
AGCACCGGTGTCCTAGTGCCCAACCTCGCCGCCGCCGCCGCCATGCCATCCAGGTCCAG  
AAGCTGACGGTGTTCCCGCGGCCGGAGGTGAAGTGATGCTGCCGGTGGCGTACACGTGC  
TACAACCTCCGGCGGCAACGTCAACAGGCAAGTTCGACGGCGACGTGGAGCTCAACAACGAG  
GGCGTGTACCGCATCTCCGACGAGCGCAACATGTTCTGTCGTCATCGGCTGCAACACCGTG  
GCGTGGAACAGCACGGGGACAGCGGTGGCAAAGGCCTCTACCGCAACCTCTACTACGCC  
GGCTGTGTACCTACTGCAGCGACTCGCGGAGCGCCATGGACGGCAAGTGCGCCGGCGTC  
GGCTGCTGCCACGTGACATCCCGCCGGAGCTCACCAGCAACGTGCTCTACTTCGAGCAA  
TGGCCGCGCGGCAACAGGTGGACTTCAGCCCCTGCGACTATGCCTTCTCGTCGACAAG  
GAGGAGTACCGATTCCGGAGGTGCGATCTCAAAATGGAGTTGAACCGGAGGATGCCGGTG  
TGGCTAGACTGGGCCATCCGTGACCGCCGCGGCAACGACTCCTCCGTGGCGTCTGCCCG  
GCGCCGGAGGTGGAGAAGAAGAAGCCGGCCGGGTATGCCTGTGTGAGCGCAACAGCGAG  
TGCGTCAACTCCACCAATGGCCCGGGATACTACTGCAATTGCAGCAATGGTTACGAGGGT  
AATCCCTACGACAACGATGGATGCCAGGTAAGAATGTTTGCTCATGCATTTAA

>OsWAK97, 3135.t00012, Chromosome 10, pre-processing  
ATGGCAATGCTAGTGCGGAGGGACATGGTGAGCTTGGTCAAGGGGATTGCCAGTTCTCAA  
GGTGAATGGAGAAGAGCCAGCGAAGGTGAGTCTTTGCTAGGTTGGCTCAGTGATGAGAA  
AAGAAATCTCTTAGGTGGCGCCAACCTCGATGTCTACAAAGCACATATCTGGCCTTTGGC  
ATTAGATTGGAGTGACATGGCAATGAGGTGCGTGAGTTCTTGGGTGGCTAAGACCTTGAG  
GACAACGGATGGCTCCCTCCCTAAACCTAATCCCTTCTCCCAAGGCATAGGTGG  
AGCTAAATGAGATAGGCACCAATGGATCTGGTAAGGAAAGAGTGGTGGGCAGTGGTAGAG

OsWAKs-Supplemental Data 1[1].txt

GAAGAGTGGTGGACTGCTCAGAATGAGAAAAGAGAGAGACCATGCGAGAGGAAGAGAGAT  
ATATAGAGAGAGAGAGACCATGCGAGATAGACTCGGGGATGGGCATAGGTGGTCATACAT  
TACGTACCATCCATCGTCACATATGTATCTTATCATCTATGATGGTTCACATGTTGCCTT  
GTGTCAAAATGTGTTTGTGACGGTTCGTAGTTACCATCAATTACAAATAATGCTACATG  
TACAACGGGTTGACCCCTATGACCATATCTTAAAAGGGTCACTATTTGACCCATCAGAGA  
TGACATTATTGAAAACAAATCTGTTTAACTCATCACAGATGATCCATCATCGATACCCAT  
TTTTGTAGTAGTGCCAGTTGTGCATTAATAAAGACATTACATTAATAAACACGAAAGC  
TACATAGCTTCTTAATCAACAGGTTCTTTGAATAAACATGCTTGTTCCTTCTTCTTCTT  
GGTGTCTTTTATGTGTTTACTATAACTTTGGAGAACAATCTTGAGATGCTTGTATGACGAC  
GTTTCAGTATGAACCTTTCTTGATAGATGTGTATCTCTTCTTATCAGTAAATGAGGCC  
GACCTTCTCTCTTTGTTTCAAAAAAATGTTGTTTTCTCTTGATGTTGCCAAACAATTG  
TCTGGATGCCCATGAGAATTTATTGAACATCCTCATATTTCTTCTTCTAAACTAAGGTT  
AACTTCGAATGAACCGGCCAATGAATAGTTTATATGCACCCATGTATGCAGATATCAACG  
AGTGCGATCCATCCAACAAGGACAAGTACCCCTGCTATGGGGTTTGAAGAACATTGTAG  
GAGATTACGAATGCAGCTGTCACTAGTTACAGCCAAGTGGTGGTGGTCCAAAGAAAC  
AGGAGTGCAATCCAAGTTTCCAGTTGCAGCACAGCTTGCCTTGGTATGCGACTATTTA  
TGTACCTCCGTGTATACTATTTTGAAGTAAATTGAATTAATTTTACACTGATTTATTTTCA  
TGCATACTTTGACTTTACGTTGAGTGCAATCACTAAACACCTAGTACCTAGTGTAATAA  
GAAGAAGGTACACAGCGTACACTCACTACTTTGTTTCAAGTTTGGATTTCCAGCTTCTC  
AAAAAGAAGTTTGGATTTCTAGTTTAAAGGAGCCAAAATTAGGGTAGGAAAGTGCATGC  
AGATGCTATTATGTTGTTATAGTAAATAAATTCTAATATAACATGTCCAATGTACATA  
TATAATATTAATAACAACAATAGTTGATAGTTATGTTTCATGAAAGTGAGAATTCGCCTCTC  
TTTCTATTGTCAAAAATCACTCCCTCCATCTCAAACCATAAGGCACAACCCAATTTCT  
TCATATCTCGTAATATAAGGCGTGTATACATGCATATATTAAGTAGAACCTCTTTCTCT  
CTAAATTCACCTTTGTTTTAAATCCTCTACCCTCAACACCCATCTCCCTCCCCCCCCC  
CAATAATCACATTACTTGCATGCATTGAGGTGGTCCAACCAAGGGAGTAATTAATTAAT  
TATTAGTCTTTGTGTTAGTGACCTTATAGTTTGGGATGGAGGGAGTAATACAAAATCAT  
GAATTTATTATATTAGCTCACATGAATTTGTGATCCTTCTAGGTGTCAGTTTGGGATTT  
CCTTCTGGTTGTTGTTGTTCTTTTCACTAATGATGCTTCAAAGGAGAAAAATGAACG  
AATATTTCAAAAAGAATGGTGGTTCAATACTACAGAATGTGGACAATATTGTGATTTCT  
CCAAAGATGAGATGAAGAAAATCCTAAAAACAATTCAGAAGTTATTGGTCAAGGAGGCT  
TTGGTAAGGTCTACAAAGGTAGACTTAAAGACAATACCCTGGTAGCAGTGACGACTTCAA  
TTGAGGTAACTGAAGCTCAAAAGGAGGATTTCAAAACGAAGTTATCATACAATCGCGAA  
TGATGCACAATAACATTATCAAGCTATTGGGCTGTTGTTTGGAGATGGATGTTCCAATGT  
TGGTATATGAGTTTGGCGCTAATGGTAGCCTAAAAGACATTCTCCATAGTGATGCCAGTC  
ACCTAGTCCCTCTCACACTAGATCTACGCCTAGACATTGCAATTGAATCTGCAGAAGGTC  
TAAGATACATGCACTCGTCCATAAGTCATACCATAACGGCATGGTGTATGTTAAGCCCGCCA  
ACATACTTCTAAGTACAAGTTTGTGCAAGATCTCCGACTTTGGGACATCCAAGCTTC  
TTACTGTAGACAAAAGAATTCACCATGGTTGTGGCAGGAAGCATGGGGTACATAGACCCAG  
TGTTCTATATGACTGGTCACTTAACACAAAAAAGTGATGTGTTTGGAGTTGTAT  
TGCTGGAGCTCATCAGCAGAAGGCAACAATATATGGCAAGAACCGCAGCCTCATTATTG  
AGTTCCAAGAGGCATATGATCAAGCAAATAGTGGGAGGTTATTGTTGACAAGGATATTG  
CCATCGAGGAAGATGTCTTAATCCTAGAAGAAATTGGTAGGTTAGCGATGGAATGTTTAA  
ACGAAAAGATTGACGAGCGTCTGATATGAAGGAGGTAGTGGCAGGACTTATGATGCTGC  
GAAGATCTAGGAAGCTTAAACAAGAAAACATAACATAAGTCGTCAACAGTTCTTTGAGG  
AGAATAGTATAGATGAACCTCCTAAGAGCTTTGATGACAACAGCTCAAGTAGCAGTGCAG  
AGCTTTTATCCAATCTAGCCACAAAGAACTCTTAACCTATAGATCGACGACTGGAAGAG  
ATTAG

>OsWAK97, 3135.t00012, Chromosome 10, post-processing  
ATGGCAATGCTAGTGCGGAGGGACATGGTGAGCTTGGTCAAGGGGATTGCCAGTTCTCAA  
GGTGAATGGAGAAGAGCCAGCGAAGTGATGAGAAAAGAAATCTCTTAGGTGGCGCCAAC  
CTCGATGTCTACAAAGCACATATCTGGCCTTTGGCATTAGATTGGAGTGACATGGCAATG  
AGTTTATATGCACCCATGTATGCAGATATCAACGAGTGCGATCCATCCAACAAGGACAAG  
TACCCCTGCTATGGGTTTGAAGAACATTGTAGGAGATTACGAATGCAGCTGTCATACT  
GGTTACCAGCCAAGTGGTGGTCCAAAGAAACAGGAGTGCAATCCAAGTTTCCAGTT  
GCAGCACAGCTTGCCTTGGTGTGAGTTTGGGATTTTCTTCTGTTGTTGTTGTTCTT  
TTCACACTAATGATGCTTCAAAGGAGAAAAATGAACGAATATTTCAAAAAGAATGGTGGT  
TCAATACTACAGAATGTGGACAATATTGTGATTTTCTCAAAGATGAGATGAAGAAAATC  
CTAAAAACAATTCAGAAGTTATTGGTCAAGGAGGCTTTGGTAAGGTCTACAAAGGTAGA  
CTTAAAGACAATACCCTGGTAGCAGTGACGACTTCAATTGAGGTAAGTGAAGCTCAAAAG  
GAGGATTTCAAAACGAAGTTATCATACAATCGCAATGATGCACAATAACATTATCAAG  
CTATTGGGCTGTTGTTTGGAGATGGATGTTCCAATGTTGGTATATGAGTTTGGCGCTAAT

OsWAKs-Supplemental Data 1[1].txt

GGTAGCCTAAAAGACATTCTCCATAGTGATGCCAGTCACCTAGTCCCTCTCACACTAGAT  
CTACGCCTAGACATTGCAATTGAATCTGCAGAAGGTCTAAGATACATGCACTCGTCCATA  
AGTCATACCATACGGCATGGTGTAGTTAAGCCCGCCAACATACTTCTAACTGACAAGTTT  
GTTGCAAAGATCTCCGACTTTGGGACATCCAAGCTTCTTACTGTAGACAAAGAATTCACC  
ATGTTTGTGGCAGGAAGCATGGGGTACATAGACCCAGTGTCTATATGACTGGTCACTTA  
ACACAAAAAAGTGATGTGTTTAGTTTTGGAGTTGTATTGCTGGAGCTCATCAGCAGAAGG  
CAAACAATATATGGCAAGAACCGCAGCCTCATTATTGAGTTCGAAGAGGCATATGATCAA  
GCAATAGTGGGAGGTTATTGTTGACAAGGATATTGCCATCGAGGAAGATGTCTTAATC  
CTAGAAGAAATTGGTAGGTTAGCGATGGAATGTTTAAACGAAAAGATTGACGAGCGTCCT  
GATATGAAGGAGGTAGTGGCAGACTTATGATGCTGCGAAGATCTAGGAAGCTTAAACAA  
GAAACTACAACATAAGTCGTCAACAGTTCTTTGAGGAGAATAGTATAGATGAACTCCCT  
AAGAGCTTTGATGACAACAGCTCAAGTAGCAGTGCAGAGCTTTTATCCAATCTAGCCACA  
AGAACTCTCTAACCTATAGATCGACGACTGGAAGAGATTAG

>OsWAK98, gi |12597733: c111450-105973 *Oryza sativa* chromosome 10 clone OSJNBb0012A20, complete sequence

ATGGATACAAAGGTAGCAGAAACACCATCTTTAACGAGATAGAGACTAACCAATCTAAGGAAACAAACTT  
CCAGATGCGACTAAACAGCAGAAGAGGACCAGATCGACGGAGCTTTGCGGCACTGCCGCGACGACTGAAT  
CCTTGGGCCTCCATTGGTGTGCACACCGTTTGACAGACCGAAAGGCTCCTACGCCTGCCACCGCGGTAAC  
GGCACAATCGGAGGTTTGTACTGAGCCGTAGATTTTGGTGTATGCATCACCAGGACTCAGCAAAGTGTT  
TCCACGGAGTCCACTGTTAAATCTGAGGAGCAAAAATTGCTCAACCCGAACGGTAGACCCAGCATGGATA  
CTGCTATTTTGAACAAAAGGAAATTTGATTCTAAAGAACAGCTAGCCAATATCACAAGTTAAACAGAT  
GGTTGTGATGGAGCTTCTGTCTTTCTAGGTGGCCAAAGATTGCTGAGATAGAGAGCCACTGAGTCAGATC  
CGACAAAAGCAAAAGTAATGAACCTTTAATGTTCCACCGCCGGCGTCCGCAACAAGGCATCCGCCATCTGG  
AGGTGTTCAAGGCCATCGGCTGAGAGTAGCAAGGAGGGCAACAGCTTCGTTCTTGACTTAATTAGGTCAT  
TTTTTGAACACGCAAAAGACTTATGCATTGATATAATATTAGAAGGAAGCAAATAGTTACACGCGCA  
AAAGGCTTTGCTTCAACTGGTACAGGTGTTTTCATCAACCTTATCTCTTTTTTCTTCATGACGTGTATGC  
TTAACGACTTTAATATGTATAGCTCTGATGCTGCATTTACATAGAATCGTTACATCAATTAGCTCACAC  
TTCTGCAACACAATATTAGCCCTCCATTGCTACCAAGTACTGTGCTTGCATGCTTGAAATGGAGAGTGCT  
AAAAATATGAGGTTTTCTCATATGTTTTGTGCACAGGAATACAAACATGTGTGCTTTTATATCACAAT  
TGCTCTATATACCTGTGAAATTTGCTATATTGTTTCTATTAACAAGTTTAGAAGAATTGATCCTACAA  
CTGCAATCTACTCCTTTTGGTCTGAGCTTCTGTGTTCAACATATTTTAATTAAGATTGGTATTCTTA  
TGCTTACCATGTTATCTTTTTTTTAAATTATTTGGCAGAGACAGGGTGGTCAACATTGAGGGATCTGTA  
ATGTTGGTATACGACACAGCTTGCAAAAATAAGATTATGATTGGAATATCACACGATGCTATGATAAG  
TTGAAGTTCAAAGTAGACATCAATCAGAATATTAAGGTTTTACAGAAGATGAGATTAACGGATTACTA  
GCAACTTCAGCATTCCGATCGGACAAGGCGGCTTTGGAGAAGTGTATAAAGGGACTCTTGATGATGACTA  
TGATCTTGTTGCGGTGAAGAGATATATTAGCAAAGATTTAAGGAAAGAGTTTATGGAAGAAGTAAGCATC  
CATAGTCAAATGAGTCACAGAATGTGGTGAGCTCATAGGCTATTGCATTGGAGAAAGTACTCTAATGA  
TTGTTACTAAGTATATCTCAAAGGAAACCTTGATGACATACTCCACAACAGTGACATTTCCATCCTTT  
GGATGTAAGGCTGGGTATTGCTATAGGATGTGCGGACGCATTGAGCTACATGCATTGATGCATTTATCG  
AATGGCAGTCTTATTTGTGATGGTGATATTAAGCCTGCCAACATACTTCTAGATAGCAATCTGACATCGA  
AATTGTCAGACTTTGGAGTGTCAAGGCTTCTTTCAAGGTGGTGTCACTCAGTACACTGTACATATAAAGG  
AAGCGTATCTTACATGGATCCTATATACTTTCTATGAGGTTGTCTTACTCCGAGGAGTGATGTTTATAGT  
TTCCGAATGTTTCTTTGGAATTAAGTTCGAAAAAGGTAAGAAAAGTGACATTAACCTCATTTGAG  
GTGGAGAAATATTTGATGCTGAGATAGCAAAACCGGCAATATGAAGATTCTAAAAGAAATGAGGAAAT  
GGCAATTGAATGCCTAACACTGGACATTATAAACGTCCTCAAATGAATGTTGTGGCAAAACGCCTTCGT  
ACACTTAAAAAAGAATTAAGACATGCATGGAAGATACTCAGAACACATTTTGGCATCACACCGCTCAT  
GGCGAAAAAATGACAACCGGGGCGGAGCTATAATTCTAGGATGCAACTGAAGAAGAGTTTGAGCATTTT  
CAAGAGAAATCTTAGCAATTTCTAAGATCCTATTGGGACTCGGCAATATGAGAATTTTACACAGGAG  
GAGCTAAATGAAATCACACAGAATTACTCGTGTCTACTCAGTGGAGGTACTTCGGGTAAGGTTTACAAAG  
GAACGCTTGAGGACAATACGGTGGTAGCGGTGAGGATATTTCCGAGGCACTTGAGGGTTTCAAGAGGC  
GTTTATCAACGGAGGGATGATCCTATCTCAAATTGTCCACAAGAACATCATCAGACTCTTGGGTTACTGC  
TTGAATGCTGATTGTCCCGCATTTGTGTACGAGTATGCTGCTAGAGGAACCTCTCTGACATTCTAGATG  
GCCGTGAAGATTTCCCACTGCATTTACGCGTGAAGATCGCAGTTGAGACAGCAGAAGCATTAGAGTACCT  
CCATTCCTCAGCAGCTGGTATGATCAGACATGGCTATGTTGCACCATCCAAGACACTTGTGATGACAGT  
TTCACGCCAAAGCTGACGGGATTTCTATGGGCGCAGAGGCTCAACAATGATGACAGCGCAATTCATGATC  
ATGATAAGTACTGTGTGCTACTAAAACGAAACCGATGTGTATCAGTTTGGTGTCTTGTCTTGACGCT  
CATTAGTAGGAAGAATTTGCGTTTTATGCGGATCACGAACACCTTGCTCGCAATTCCTTGACGCTTAC  
AAGGCAGATAACAGTGGAAGGGCATTTCGACGATGATATCACAACCTCGTAGCGAAGATGTTGCTCTCC  
TCGAAGAGATAGGGAAGCTATTGCTCAAGTGTATTTGTTTGGAAATAGATCAAAGACCAACAATGAAACA  
AGTGGCACAACACCTTCGGATCATTGAGAGATGTTGGAAGAATAATTGCACAGCCGATGGAGCTTCACTG  
GTAACATAATTAATCTATATATCACTAGAGCTGATGAAGGAAGTGAACCTTGACAGTACACTTGGTTTC  
ACTCTAAGTGATCGTGTACAAGCATTGTGTGTGAATTGTAATATATTATTTGTTACCAGAACATCTTGCA

OsWAKs-Supplemental Data 1[1].txt

GTATATGCTGCCATTCCGGATGATGTTATCTGAACCTTGCATGCAATCTGCTTCTTATGCGGTTCGATCCCAT  
 GATGTTTTATCTGAACCTTGGTTCTACTAGTGGATATAGAAAATTCATGTTCAATGTTGGTAGTGGTGTTC  
 CCTTAATACATGTTTTATAAATAATTTGCGATCATGAAGCTATATATGTAAACCATGTACTCCATTGTTAT  
 TCAGTTTCGTGCAGCTTAGTGAATGAACAGATTGTGCTGCACCTGTGGACCATGTAAGGTATCGGAGGTCC  
 TCCTCTTATTCTACGGAGGGGCTATATCTTATAGCCCGCATCCTTCATCTTCCCCAGGTTGAGTGAAGG  
 AAGGCCACAGTGCTTTTAGGAGGCTCCACACCGATAGAGTTTAGCCAGTCGGTTAGGGGGAGGTCCCCCT  
 ATCTTCCCCCAACAGTAGCACCTCAAGGGCTCAAGTTCTGGTGGACTGCAAGGCATATCAGAGGGTGAC  
 AATATTTTTGCCAAAACAATGACACAGTTCAATTTGTTTTGTATGGATTGAATTATTTATGGTTTCAGT  
 TCGAATAGCTAGCTAGTTACTCCCATTGGCCAGTGGCATATCCAGGATTTTCAGGCTAGGTGGCCAGCTC  
 AACAATTTTTAAGAACACTATAGATTTAATGTGCCAACGTTTTTTTATTTGATCAGATTGCGTTTCGTAA  
 ATTCTACACTTGTACGTTGGCATATTACATCTATAGTATAATAAAATGAACCAATATCTTTAAATTTAC  
 CATTCTAATAGGAAATCCAGTATCAAAATGAAATTGAACCTCGAGGGTGGGAGGAGATGAGAACATGTTG  
 CCTACAGGCAGCGGTCAATAATGTCTATTGATGTCATAGCATACTAATTATATATACTTAGAATATAGT  
 GTTATATGGATAAGCAGTTTAATTATAAGTTTTGCTGAAAGTCATCGGCATCGCCTGACACCAATGTTAG  
 CATTGTAGATTTCGTCCTTGGCTGCCGGTGTGTTGATTCTGCTTCAAATCGCCACCGCGGTTGCCGCGTCCG  
 TTTCAAAAAGACGTGCGTGGGAAGGCAGAATTCAAGTAGACGCTGTCATGCGGCGAAACAACGAAGCAT  
 CGATGTTTTTTTAGTAGTGTATGCAGGTAATGGGCCTTGGTCCATTCTATGGTGGTACATGCATCACAAG  
 GATCATACTGTAGCTCTGCATCCGGCATCGACTATAAGTATTGTTTTGTCAACATGGTCAGAATTTGTTT  
 TTTTCATCAAATTCCTTTTACTTTTAGCAGAACATGATCAAATTCCTACTGATACTTACTGCAAATTAACAA  
 AACAAAATCCAATCCGATCCAATTTGGCCTGAACCTACTGTGATTTTATACTATTTTATATGGGCCGTGA  
 AGTTCAACCGTTGTTCTCTCAAATGGAATAAGTTTCATCTAAGATACCTTAACCTTGTCAACGAATCCGATT  
 TCATCATTCAACCGAAAAACCAGATAAATAATTCTCTCAACTATTAACCGGTACAATATAGGTCCCAT  
 AGCGGTTTTAGATTACGTGGCCAATTTGACTCGATCTTCATCTGACGTGGCATTAAACATGGCACATGAAA  
 CAAAATTTAATAATTTAAAAAATAAAACAAAATATATAGGCCACATGTCAGTCAAATAATAAAATTTAA  
 AAATAGTGGGGCCACTACCTCCCCACATCCCCTCTCTTCTCTCTCTCTCTCTCTCTCTCTCTCTCTCTCT  
 CCCCTCTCTCCATCGTGGAGTACACAGCAGCATGCCCGCGATGTCGGGGGAGGACGGCGGTGTGGATGC  
 AGCTGCCGTGTGCCGTCTTGGCTGGCAGAGGACGCGATGAGGATGACGCAGCTGCCAAGCGTGGATCCGA  
 AATCCGCCTTCCATTTGAGCATCACGCCTTCTCCACGCTGATCTCACCGGCGAGGAGCTCGATCTGCAG  
 GCGGAGGGTACGAATGCCACGAGGACGGAAGCGGTGGAAGTGGTCATTGCGACCACCGGCGGCGGAGGAG  
 GAGAGCCATCCGTGATCTTCGCCGGCGTACACCGCTAGCGGGACCCACCGGATTTTCGACCATCACCG  
 GCGAGGCGGACCGGATCTGGAGAAAAGCGTGGCTCCGTGGAGATGCAGGGACACCGCGGCGAGGACGG  
 GTTTCCTGTCTCCCTAG

>OsWAK98 gi |32990317|dbj |AK105108.1| *Oryza sativa* (japonica cultivar-group) cDNA  
 clone: 001-100-F06, full insert sequence

ATAAAGGGACTCTTGATGATGACTATGATCTTGTGCGGTGAAGAGATATATTAGCAAAGATTTAAGGAA  
 AGAGTTTATGGAAGAAGTAAGCATCCATAGTCAAATGAGTCACAGAAATGTGGTGGAGCTCATAGGCTAT  
 TGCATTGGAGAAAGTACTCTAATGATTGTTACTAAGTATATCTCAAAGGAAACCTTGATGACATACTCC  
 ACAACAGTGACATTTCCATCCCTTTGGATTGAAGCTGGGTATTGCTATAGGATGTGCGGACGCATTGAG  
 CTACATGCATTCGATGCATTTATCGAATGGCAGTCTTATTTGTCATGGTGATATTAAGCCTGCCAACATA  
 CTTCTAGATAGCAATCTGACATCGAAATTGTGAGACTTTGGAGTGTCAAGGCTTCTTTCAGGTGGTGTCA  
 CTCAGTACACTGTACATATAAAAGGAAGCGTATCTTACATGGATCCTATATACTTTCATGAGGGTTGTCT  
 TACTCCGAGGAGTGTGTTTATAGTTTCGGAATGGTTCTCTTGGAACTAATAGCTCGAAAAAGGGTAAGA  
 AAAGGTGACATTAACCTCATTGGGGGTGGAGAAATTTTATGCTGAGATAGCAAACCGGAGCAATATGA  
 AGATTCTAAAAGAAATGAGGAAATTTGGCAATTTGAATGCCTAACACTGGACATTCAAAACGTCCTCAAAT  
 GAATGTTGTGGCAAAACGCCTTCGTACACTTAAAAAGAAATTAAGACATGCATGGAAGATACTCAGAA  
 CACATTTTGGCATCACACCGCTCATGGCGAAAAATGACAACAGGGGCGGAGCTATAATTCTAGGATGC  
 AACTGAAGAAGAGTTTGAGCATTTTCAAGAGAAATCTTAGCAATTTCTTAAGATCCTATTGGGACTCGG  
 CAATATGAGAATTTTACACAGGAGGAGCTAAATGAAATCACACAGAATTACTCGTGTCTACTCAGTGGG  
 GGTACTTCGGGTAAGGTTTACAAAGGAACGTTGAGGACAATACGGTGGTAGCGGTGAGGATATTTCCG  
 AGGCACTTGAGGGTTTCAAGAGGCGTTTATCAACGGAGGGATGATCCTATCTCAAATTTGCCACAAGAA  
 CATCATCAGACTCTTGGGTTACTGCTTGAATGCTGATTGTCCCGCATTTGTGTACGAGTATGCTGCTAGA  
 GGAACCTCTCTGACATTCTAGATGGCCGTGAAGATTTCCCACTGCATTTACGCGTGAAGATCGCAGTTG  
 AGACAGCAGAAGCATTAGAGTACCTCCATTCTCAGCAGCTGGTATGATCAGACATGGCTATGTTGCACC  
 ATCCAAGACACTTTGTTGATGACAGTTTACGCCAAAGCTGACGGGATTCTCATGGGCGCAGAGGCTCAAC  
 AATGATGACAGCGCAATTCATGATCATGATAAGTACTGTGTGTCATAAACTGAAAACCGATGTGTATC  
 AGTTTGGTGTCTTGTCTTGACGCTCATTAGTAGGAAGAACTTTGCGTTTTATGCGGATCACGAACACCT  
 TGTCTCGCAATTCCTTGACGTTACAAGGCAGATAACAGTGAAGGGCATTTTTCGACGATGATATCACA  
 ACTCGTAGCGAAGATGTTGCTCTCCTCGAAGAGATAGGGAAGCTATTGCTCAAGTGTATTTGTTTGGAAA  
 TAGATCAAAGACCAACAATGAAACAAGTGGCACAACACCTTCGGATCATTCCGAGATGTTGGAAGAATAA  
 TTGCACAGCCGATGGAGCTTCACTGGTAACATAATTAACTCATATATATCACTAGAGCTGATCAAGGAA  
 CTGAACCTGACAGTACACTTGGTTCACTCTAAGTATGCTGTACAAGCATTGTGTGTGAATTGTAATA  
 TTATTTGTTACCAGAACATCTTGCAGTATATGCTGCCATTCCGATGATGTTATCTGAACCTGCATGCAAT

CTGCTTCTTATGCGGTGCGATCCCATGATGTTTATCTGAACCTGGTTCTACTAGTGGATATAGAAAATTCA  
TGTTCAATGTT

>OsWAK99, 3164.t00008, Chromosome 10, pre-processing  
 ATGGCTGCGATGATATTAATAGCAGTAGCAGTAGTCGTGCAGCAAGCGCTGATCCTGGCA  
 GCAAGAGCCATCGGCGATGGGCAGCCGATCACGCTCGCCGGCTGCCCCGACAGGTGCGGC  
 GACGTTAGCATACCGTACCCATTGCGCATGGCGCCCGGATGCTTCTGGACGGCTTCGAG  
 GTCACCTGCAACCGCACCTTCGACCCCCCTCGCGCTTTCTCGCATGGGGCTCGCCGGAC  
 TCTCCGTTCCAGGGGAACGCCGACGGCTACTACCTGAGCGATAACGACAGCGTGA CTCTG  
 AAGGACTACTGGTCCCTCCCCGTGGAGCTCGTGGACGTGACGCTGTGCGCGGGCGAGGCT  
 CGGGCGTACGGCGCCGTACCACCGACTGCGCCGCCACCAACGGGACCTACCACGAGTTC  
 CGGCGGCAGCTCACGGTGCTCTCCGGCTCGCCGTTCTGTTCTCGGCGTTCGCGCAACGTG  
 CTCACCGGCGTGGGCTGGGACATGGAGGCGCAGCTCACACGTCGCTGGCCAGCACGGGC  
 TACAGGCTCAACTGCGCGTTCGCGGCTGATGTTCCCCGAGACGGCGGAGAACGGGTCTGTC  
 TCGGGGATGGGTTGCTGCGAGGCGAACGTGACGGCCGGCCTCCGCATAGCCTCCGTACAG  
 TTCGCCCACAAGAAGACGTCTTTTGGTCTGCTCAATCCTTGCTCCTACGGGATGATTGTC  
 CAGAAGAACTGGTACAACCTTACCAAGGAGGATCTCTACGGCAACCAGACCTTGTCCAGG  
 AAGCACCCAAGGGGCGTCCCTTTCGTGCTCGACTTCGCCATCGCCAACGTCTCCTGCCCT  
 GCGCAAGGCCAGCCGCGCTGGACAACCTACGCTTGTGCGCAGCAGCAACAGCTTCTGCGTC  
 AACGCAACCCAGCAGCCAGGCTACATCTGCAAGTGTCCGATCATTACGATGGCAACCCA  
 TACATCGCTGATGGTTGCCAAGGTTTGATTGTGAACCATTTGTACCTCCCTCTCTTAAAT  
 ATTGATACTACCATATACATACATACATATTATATTGATAGACTAACAGCAGATCATGAT  
 GCCCAGACATTGACGAGTGCCAACCTCCGAATACAATTTCTGAGCTTCGCGACGTGTACC  
 CGTGCTCGAGTGATGGGATCTGCAAGAACAGGCCGGGAGGTTATGACTGTCCGTGCAAAC  
 CTGGCATGAAAGGCGATGGCAAAGCAGGAACCTGCACTGAGAAATTTCCACTGGTAGCCA  
 AAGTGATTGTGGGTAAAGCTCGCATGTGTAGCCCCATCTCCGAATAGGTTATCGTCATCC  
 ATTTCTACTTATTTTATCATGCTACTCCTGTTTTCTGGTAAAAGAGATTACATTACGTT  
 TAATGTTTGGGTCAAACCTTTCAAATTTTGATTCTCAATAATTTTAAAAATACTCCCTCC  
 GTTTTCAGGTTATAAGACGTTTTGAATTTGATCAAAGTCAAACCTTTTAAATTTAACTAA  
 GTTTATAGACAAATATAGAGCCTGTTGGGAAGCTTAAGATTCTAAGAAACAGCTGGTTGG  
 TAGCCAGCTTCTGAGAATCTGAAAAAGCTGGGTTTCCCAGCTTCCGGCTTCTAGTTTATT  
 TTCTGATTCTACAACCTACAGATTCTCAGAATTGGACCAAAAGCTAGGCTGTTTGGGGAG  
 CTTCTGATTCTGGAAAATGCTGCAGCAGCTATAAGCTCCCCAAACAGGGCCATAGTAAT  
 ATTTATAATACCAAGTTAGTTTCATTAATCAATAATTGAATGTATTTTCATAATAAATT  
 TGTCTTGGGTTAAAAATGTTATTATTATTTTTCTACAACTTGGTCATACATAAAGCAAT  
 TTGACTTTGGCCAAAGTCAAAACATCTTATAACCTGAAACAGAGGGATTACTTAATTTGG  
 GAACATAAAAAATGGTAGTACCAATACGTAGATTTGTCTTAATTTTATTTTAACTTTATG  
 TGTAGTAAATCTATGTTTAAAGTGGTAACCTCAAAGATAGTAAAACTCAAACGTTTATG  
 CCAGAGATAGTACAAACTAGTAGATTATTTTATTTTATTTTACATATACTATATTAAT  
 TATTTTGTCTAAATATATGCTAGTTACTAAGAACTACTTCTTGTCTTCTACATATATATA  
 GGAGTCGTAGCGGGTCTCCTTGTCTCGCAACTCTGGTTTTTGTCTTCTTCTCGCAAG  
 GAGAAACAAAAGATGAGGGAATTTTTCATTAGAAATGGTGGTCCTATACTGGAAAATGCA  
 AAGAGCATAAAGATATTCAGGAAGGAGGAGCTAAAGCGAATTACAAAACTTATAGTCAT  
 GTTCTTGGAAATGGTGCTTTTGGTATGTTATATAAAGGTTCTTGTGATGAACAGCATCCT  
 GTTGCGGTAAGAAGTCCATGAAAGTTGACAAGACGCAAGGACCAATTCGCAAATGAA  
 GTTATTATCCAATCTCAAGTAATCCATAAGAACATCGTCAGGCTAATAGGTTGCTGCCTT  
 GAGGTAGATGTCCCGATCTTGGTCTATGAATTTGTTTGAATGGTAGCCTGCAAGACATC  
 CTTACGGTGAGAACAAAGTTCCTCTCACTTTAGACAAACGTTTGGCCATTGCTGCCGAA  
 TCTGCAGAAGGCCTGGCTTACATGCATTCCAAGACCTCACTAGCATTCAACACGGTGAC  
 GTTAAGCCTGCCAATATACTTTTGGACGATCAATTCAACCCAAAAATATCTGATTTTGA  
 ATATCAAGGTTAATTGCAAGAGATGTCACCGAGCACACTAACGATGTTATTGGCGACAAC  
 AACTATATGGATCCAGTTTATCGTGAACTGGTCTGCTAACTAACAAGAGTGATGTCTAC  
 AGTTTTCGGTCTTGTGCTCTTTGAAATCATCACCGTAAGAAAGCTGTTTATGGTGGTGAA  
 AGTAGCTTTGTGCAAAATTACCTTGACACATACTTAAGTATAGATAAGAGCAAATAAGATG  
 CTGTTTGGTAAGGAGGCTGAAGAAAAGGACATTGAGCATCTCCATAATCTTGTGTGATA  
 TCCAAAGAGTGTTTAGACAATAATGTGGACCAAAAGGCCGAGATGACAGATATAGCAGAA  
 CGTCTGCAAGGCATTATTAGATCCCGGAAGTTTCTTAATTGA

>OsWAK99, 3164.t00008, Chromosome 10, post-processing  
 ATGGCTGCGATGATATTAATAGCAGTAGCAGTAGTCGTGCAGCAAGCGCTGATCCTGGCA  
 GCAAGAGCCATCGGCGATGGGCAGCCGATCACGCTCGCCGGCTGCCCCGACAGGTGCGGC  
 GACGTTAGCATACCGTACCCATTGCGCATGGCGCCCGGATGCTTCTGGACGGCTTCGAG  
 GTCACCTGCAACCGCACCTTCGACCCCCCTCGCGCTTTCTCGCATGGGGCTCGCCGGAC



OsWAKs-Supplemental Data 1[1].txt

TCTCCGTTCCAGGGGAACGCCGACGGCTACTACCTGAGCGATAACGACAGCGTGACTCTG  
AAGGACTACTGGTCCCTCCCCGTGGAGCTCGTGGACGTGACGCTGTGCGCGGGCGAGGCT  
CGGGCGTACGGCGCCGTCAACACCGACTGCGCCGCCACCAACGGGACCTACCACGAGTTT  
CGGCGGCAGCTCACGGTGCTCTCCGGCTCGCCGTTCTGTTCTCGGCGTGCAGCAACGTG  
CTCACCGGCGTGGGCTGGGACATGGAGGCGCAGCTCACCACGTGCTGGCCAGCACGGGC  
TACAGGCTCAACTGCGCGTGCAGGCTGATGTTCCCCGAGACGGCGGAGAACGGGTCTGTC  
TCGGGGATGGGTTGCTGCGAGGCGAACGTGACGGCCGGCCTCCGCATAGCCTCCGTCACG  
TTGCCCCACAAGAAGACGTCTTTTGGTCTGTCATCTTGTCTCTACGGGATGATTGTC  
CAGAAGAAGTGGTACAACCTTCACCAAGGAGGATCTCTACGGCAACCAGACCTTGTCCAGG  
AAGCACCCAAGGGGCGTCCCTTCTGCTGCTGACTTCGCCATCGCCAACGTCTCCTGCCCT  
GCGCAAGGCCAGCCGCCGCTGGACAACCTACGCTTGTGCGAGCAGCAACAGCTTCTGCGTC  
AACGCAACCAGCAGCCCAGGCTACATCTGCAAGTGCTCCGATCATTACGATGGCAACCCA  
TACATCGCTGATGGTTGCCAAGACATTGACGAGTGCCAACCTCCGAATACAATTTCTGAG  
CTTCGCGACGTGTACCCGTGCTCGAGTGATGGGATCTGCAAGAACAGGCCGGGAGGTTAT  
GACTGTCCGTGCAAACTGGCATGAAAGGCGATGGCAAAAGCAGGAACCTGCACTGAGAAA  
TTTCCACTGGTAGCCAAAGTGATTGTGGGAGTCTAGCGGGTCTCCTTGTCTCGCAACT  
CTGGTTTTTGTCTTCTTTCGCAAGGAGAAACAAAAGATGAGGGAATTTTTCTATTAGA  
AATGGTGGTCTATACTGGAAGATGCAAGAGCATAAAGATATTCAGGAAGGAGGAGCTA  
AAGCGAATTACAAAACTTATAGTCATGTTCTTGGAATGGTGCCTTTGGTATGGTATAT  
AAAGGGTTCTTGTATGAACAGCATCTGTTGCGGTAAAGAAGTCCATGAAAGTTGACAAG  
ACGCAGAAGGACCAATTGCAAAATGAAGTTATTATCCAATCTCAAGTAATCCATAAGAAG  
ATCGTCAGGCTAATAGGTTGCTGCCTTGAGGTAGATGTCCCGATCTTGGTCTATGAATTT  
GTTTCGAATGGTAGCCTGCAAGACATCTTTCACGGTGAGAACAAGTTCTCTCACTTTA  
GACAAACGTTTGGCCATTGCTGCCGAATCTGCAGAAGGCCTGGCTTACATGCATTCCAAG  
ACCTCAACTAGCATTCAACACGGTGACGTTAAGCCTGCCAATATACTTTTGACGATCAA  
TTCAACCCAAAAATATCTGATTTTGAATATCAAGGTTAATTGCAAGAGATGTCACCGAG  
CACACTAACGATGTTATTGGCGACAACAACATATATGGATCCAGTTTATCGTGAAACTGGT  
CTGCTAACTAACAAGAGTGATGTCTACAGTTTCCGGTCTTGTGCTCTTTGAAATCATCACC  
GGTAAGAAAGCTGTTTATGGTGGTGAAAGTAGCTTTGTCAGAAATTACCTTGACACATAC  
TTAACTGAGATAAGAGCAAATAAGATGCTGTTTGGTAAGGAGGCTGAAGAAAAGGACATT  
GAGCATCTCCATAATCTTGTGTGATATCCAAAGAGTGTTTAGACAATAATGTGGACCAA  
AGGCCCCGAGATGACAGATATAGCAGAACGTCTGCAAGGCATTATTAGATCCCGGAAGTTT  
CTTAATTGA

>OsWAK100, 3830.t00015, Chromosome 10, pre-processing  
ATGGAAGATAAACTAGGTCTTCCAGAAAATAAGCTTAGAGATTTTATCCAAGGAGCTGAC  
AAGGCAAAATGGATAGCTAAGAATAATCATAACATAAAGTATTTTACAGAAGATGAGATC  
AAAAGAATACCAGCAACTACAGCACTAGCCTTGGAATGGTTCAATTCGAAAAGTTTAC  
AACGGAATCATTGATGATAACACTGCAGTTGCGGTGAAAAGATATTCCCGCATAGATTCA  
GAAGAAGAGTTTGCCAAAGAAGTAATTGTCCACAGCCAAGTCAACCATAAGAATGTAGTT  
AGGCTAATTGGATGTTGTACAGAGAAAAATGCTCCAATTATGGTCTTTGAGTATGTCTCT  
AATGGAACCTTTGCGAGAACCCACATGGCAGTAATGTTCCCGTCTATTTGGACAAAAGG  
TTGAGTATAGCCATACAATGTGCGGAAGCGCTAGAGATAGTTTTACATATACTTCCAACG  
TAA

>OsWAK100, 3830.t00015, Chromosome 10, post-processing  
ATGGAAGATAAACTAGGTCTTCCAGAAAATAAGCTTAGAGATTTTATCCAAGGAGCTGAC  
AAGGCAAAATGGATAGCTAAGAATAATCATAACATAAAGTATTTTACAGAAGATGAGATC  
AAAAGAATACCAGCAACTACAGCACTAGCCTTGGAATGGTTCAATTCGAAAAGTTTAC  
AACGGAATCATTGATGATAACACTGCAGTTGCGGTGAAAAGATATTCCCGCATAGATTCA  
GAAGAAGAGTTTGCCAAAGAAGTAATTGTCCACAGCCAAGTCAACCATAAGAATGTAGTT  
AGGCTAATTGGATGTTGTACAGAGAAAAATGCTCCAATTATGGTCTTTGAGTATGTCTCT  
AATGGAACCTTTGCGAGAACCCACATGGCAGTAATGTTCCCGTCTATTTGGACAAAAGG  
TTGAGTATAGCCATACAATGTGCGGAAGCGCTAGAGATAGTTTTACATATACTTCCAACG  
TAA

>OsWAK101, 3178.t00010, Chromosome 10, pre-processing  
ATGGCGGTGCTAGGCCTTGAGGCAGGGCGCAAAGGGAGCAATGGCAGTGCTAAGGGAGCT  
GGCAGCGGTGGGTCTGTTCTCTGTTGTGATCTGCACCCTTGCCCTTCTGGAGCTCCT  
CCCCTTCTATGTGGGAGTTTCTATGTTGGATTGAGGCGGACGGGTTAGCGAGGGAAG  
CTCAGATCGCCATCAGCAGCTGTCTAGTTCCGGGTTCTCTTTGCGCCAAAAGTACGAAG  
GAGGCCGGCAGATGGTGGGACGGAGGAGGCTGGGCCAGTTCTAGGGGTGGCGGCAGCT

OsWAKs-Supplemental Data 1[1].txt

CTCTGCAGCAAGTGTGGTGGTCCGGCCGGTGGAGGGGTGCCGACGTGGTGGCGGTGGAGGCC  
TCGTGCTAATCTGCTTGCAGATGGTTCCTGAGTTGATGGGCGACGAACCTCAAGCAAGG  
TTGCATGGGTTCTGGGCGAAAGCCTCGCCTGATGGTTCATCGGGCTGGCAGCGGTGACGC  
CTTTGGGCGTCGTAACCTCCTTGGGGCGTGGCAATGATACCCCTCTCCCTTGGTGAGT  
TTCCTAGGTGAAAACCATGTTCTTAGATGGGCGATGGCGCGTCTTTGATGTCGTG  
ACCTCCATGGGGGCATCGTTTTTCAGAGTCTCGTCTTTGTTGTTTTGTCGTTGGCCCGGC  
GGCGATCGGTACGCATAGCGGGGTCGTTTCGGTGCTAGGTTCTTCTCTCAATGGGTTG  
TGTCTGTGTGGTTAGCATGTGGCTTTGGTTGTGCACTTTTATGTCACCTCCGTCTCGACA  
GCTTCTGTGCGAGTTTTTTCTTGTAACCTTTATTCCTTTTTAATGTACTCGGATGGCCTCC  
TTCAGCCTTCTCGGCGAAAAAATAACCACTTATAATTTTATAGTATACCATTATACCA  
CCAAGATGGTCATAGAGCTTGCAATAACGTCGACTGGTGCTGTTTGGATCTTCTATCCCA  
ATCTGTATCTGTTTTGGTAATTGGATGAATTTTACTGGAAGTTAGACTCGCACACAACCTA  
AGGTCCTGTTTGTTCAGCTTGAGATTATTGTAATCTAGATTATTAATCAGATTACTCT  
AAGCTGGATTATAAAGCTGACATAAAATAAGCTACGAGTTGTTTGTCTCTAGATTATTA  
TTAGATGCATCTAAGGCTAGTGGGCTTTAGCCACTCAATAATCTGAAAAAAGCTCTTCT  
AGAGGAGATTATTGTATTTAGTAATCTGGCTTATAGATTATAATAATCTAGCATAATAA  
TCTACTTGTGTTCAGCTTACTCCTAATAATTTAGATTATAATAATTCTAACTGAAT  
CAAACAGGGCCTAAATCCTCGTATAATTAAGGTGTCCCAAACAGGGAAAGACGGCATA  
ACATAATGGACACAACAAATCTTACCCTGAATCCAAAAGTTCAAAGGCATACAAATTTA  
TCCTAAAACTTGGGCGCAAAATAGAGCTGAAGGCGATTGTATTCTGCAAAATATATTAG  
GTCAAATGAAGTCAGGCTCGTATCAAACATAAACCAATTTTCTTGTACATGCATATAAG  
AAACGACATCGATTTTCATGAGATTGTTGAAAATTTAATTTAGGTTATGCTTTTTGTTTT  
ATAAGCTGTGAGCAGTTCAAGTTAAGGTCTGTTGCAACTCTGCTTTTTAGGGACAATTAC  
CTTTGGAATATAGCCATATATTTTTTATACTATGCACATGTGTGGTAAAAAATCTAA  
CAATGCATTTAAATTGATATTTAACTTATACTTATCATGTGACCAGGCCATCATCAATTT  
ATTTGAAGCAAGAAGCATCATATTGTATAATTATGGATCTTTCAGAAAGCAAGCACAAG  
AGTATATTGAAAGGGCACAATGGATAGAGGAGAACATTTCTAATATAAAGCCTTTCACAG  
AAGAAGATATAAAAAAGATTACCAGTGACTACAACACCAATCTTGAAATGGTGGATTGCG  
GAAAAGTTTACAAGGGAGTTCTTGATGATAACCATTTCTGTTGAGTGAAGAAGTATATTA  
AAATGGATTCTGAAGAAATGTTTGCCCAAGAAGTACGTGTTACAGTCAAATCAACCATA  
AAAATGTAGTCAGGCTAATTGGCTACTGCATCGAGAAAAATGCTCCAATGATGGTCATGG  
AGTATGTGCTAATAGGGACCTTGATTACCATCTTCATGACAAGAATAGCCTTGATTCAT  
TGGACATAAGATTGGATATTGCTATAGAGTGTGCAGATGCTCTAGGGTATTTACATTCTA  
TGTGCAGCCCTGTTCTACATGGTGATGTAAAGCCTTCCAATATTCTGCTGGATGACAATT  
TTAATGCAAAAATAACAGATTTTGGAAATATCGAGACTTCTCTCGACAGACAAAACCTCATA  
CTGTAAAGTGTATAGGGAGTATAGGTTACGTGGATCCCCTGTATTGTGCGGGAGGGACGTC  
TCACCTCCAAAAGTGATGTTTATAGTTTTGGAATAGTTCTTCAGGAGCTTATCACCAAGA  
AAAAGCGGCAAGTCTGGCTCAAGCTCTGTATATTAGTGAAAAAGAATGTTACAGCACGTG  
ATCCCAAAATTTGCAATTGAGAGCAACATGAAGGTTTTAGTGGAGATTGGAAAATTAACAC  
AGGAATGCCTAACAGAGGACATTCATAGACGTCCGGATATGTGCGACCTGGCTGGGCACC  
TTCGGATGCTTAGGAAATCTGTTTGAGACAACCTGCTCCACTAGAAAATTTTGGTTGGC  
ACCTCTTTCCTGAAACACAGAATGAAGATAAAGAACAAGCCAGCAAGGTACAAACAATG  
TCAGCTCCAGTTTGATGGCGTTCCCTAAGATGGCAGGCATTTTCAACCGGAACATGTACA  
AATCTAGAAAGAAAGCAACCTCTGTATATTAGTGAAAAAGAATGTTACAGCACGTG  
AAATAAAAGTAATAACAAATAACAATTCAACAATTATTGGTAGAGGTGCATTTGGTAATG  
TCTACCTAGGAATTTCTGAGAATTATAGAAAGGTGGCAGTGAAGACATACATAAAAGGAA  
CTGAACATGAAGAGGATCGATGTGGTAAAGAGCTGAACCTTCCCGAAGTATCCATAAGA  
ACATTATCCAACCTGTTGGGTTTCTGCTGTAAGCTGGATGCTGTAATATTGGTTTATGAAT  
TTGCTAACAAAGGGAGCCTCTACGACATACTCCATGGTACTAGCAATTTTCTTTCCAC  
TAGATTTACGTCTAGATATTGCTGTTGGGTCCGAGAGGACTGGCATATATGCACAGTA  
GATCCAAACCCATACTACATGGAGATGTCAAAACAACCCATATACTTTTTGATGACAACA  
TTGTGCCTAAAATCTCAGGTTTTGGATCATCACAGATAGGAGAAGATAGCACATGGGTTG  
TGGCAGCTGACATCAATTACATAGACCGAAGGTACATTCAAACCGGACTTTTACACGGA  
AGAGTGATATCTATAGTTTTGGAGTTGTTCTCTTGGAACTCATCACCAGGAAACGAATTT  
TAGATAGTAAGAAATGCAGTCTTGTGTCGAGTATGTCAATTGTTATGAGAAAGAAAACA  
GTGGGAGGATTATGTTTGACAATTGAGATGAGTCTGAGGAAAACATGGCCACCCTTGAAG  
CAATTGGCATTCTAGCAATGAAGTGTAAAGTGATAATATAGATGAACGACCAGAAATGA  
GAGAAGTAGCCGAACAACCTGGTGATGCTTAAATGGCTTGAAGCAGCTCAAAGGAAACA  
TATAA

>OsWAK101 gi |32996276|dbj |AK111067.1| Oryza sativa (japonica cultivar-group) cDNA  
clone: 002-175-E02, full insert sequence  
AAGCTGCCAACCAACCCAGCGGCAGCGGCGGGCCGATGAAAAAGCTGGTGATGAGACGCGAGCGGCGGC

# OsWAKs-Supplemental Data 1[1].txt

GGAGCGAGCTGTTGTAACGCAAGCGGTGGCGCGAGTGAGGTGCGCGGCAGTATCCTCCGTCGTCGCCTCG  
TTGGGAGCGGTGCGCTCTACGGTCAGGCCGCCGCTAGCTGGGATTTGAGGAAAGAGGTGCCAACCAAAA  
TTTTCTAGTGAGCAGGTTGTCTCAAGCAGAATTTCTAAGCATCCGAAGGTGCCAGCCAGGTGCGACA  
TATCCGGACGTCTATGAATGTCCTCTGTTAGGCATTCTGTAGTAATTTTCCAATCACCCTAAAACCTT  
CATGTTGCTCTCATTGCAAATTTTGGGATCAAGCAATTCAGTCACCCCTTTTCTTCAGCAAGAGCTTGA  
GCCAGACTTGCCGCTTTTTCTTGGTGATAAGCTCCTGAAGAACTATTCCAAAACATAAAACATCACTTT  
TGGAGGTGAGACGTCCCTCCCGACAATACAGGGGATCCACGTAACCTATACTCCCTATACACTTAACAGT  
ATGAGTTTTGTCTGTGAGAGAAGTCTCGATATTCAAAATCTGTTATTTTTGCATTAAAATTGTCATCC  
AGCAGAATATTGGAAGGCTTTACATCACCATGTAGAACAGGGCTGCACATAGAATGTAAATACCCTAGAG  
CATCTGCACACTCTATAGCAATATCCAATCTTATGTCCAATGAATCAAGGCTATTCTTGTC

>OSWAK102, 3178.t00025, Chromosome 10, pre-processing  
ATGGATCTTCAAAAAACAAGCATAATGAATTCATCGAAAAGCCAAAATGGATAGAGGAC  
AACATTTCTAATATAAAGGCATTACGAAAGAAGATATAAAAGGAATTACCAGTAACCTAC  
AGCAAAAGGCTTGGAATGGTAAACTCGGAAAAGTTTACAAGGGTATTCTTGATGATAAC  
CATGCTGTTGTGGTGAAGAAGTATATTCATATGGATTCTGAAGAAGAGTTTGCTAAAGAA  
GTAATTGTCCATAGTCAAATCAACCATAAGAATATAGTCAGGCTTATCGGCTATTGTACT  
GAGAAAAATAATCTAATGATGGTCATGGAGTATATGTCTAATGGAGACCTTGATTACCAT  
CTTCATGTCAAGAATAGCCTCGATTCTATTGGACATAAGATTGAACATTGCTATAGATTGT  
GCAGATGCTCTAGGGTATATGCATTCCATGTGCAGCCCTGTTTTACATGGTGATGTCAAG  
CCCTCCAACATTTCTTAGATGACAGTTTTAATGCAAAAATATCAGATTTTGGAATATCT  
AGGCTTCTCTCAACAGACAAAACCTCATACTGAAAATATGATTACATGTTATATGGACCCT  
CTGTATTACCAGGAGGGGCGTCTCACCTCAAAAAGTGATGTTTATAGTTTTGGAATTGTT  
CTAATGGAACATAATCACCAGAAAAGGGCTACATGTCTCACTCAAGCTCTTGCTGAAGGA  
CAAGAGATGACAGAATTGCTTGATCCTATGATTGCTAATGAGAGCAACATGAAGGTTCTA  
CTGGAGATTGAAAACATAGTGCAGGAATGCCTAGCAGAGGATATTGATAGACGCCCTGAT  
ATATGTGATGTGGCTGCATACCTTCGGATGCTTAGGAAGATGAGTCAACAAGCACCACAA  
GAAAATTTTGGTTGGCACTTGTTTGAGAAACACAAAATGATTTTAAAAAGCAAAGCCAT  
CAAGGTACAAACATTATCAGCTCTATCAAGATGGTGTTCCTAGGATGATGGGCATTCTC  
AACGTGAACATGGCCAAATCTGAAAACAAAGGAACCTCCGCTCTATGTTAGTGGCAAAAAGA  
ATATTCACAGCATTGGAATAAAGAAAATAACAGGAACTATTCAAGAATTATCGGTAAA  
GATATGTTTACTGTGGTCTACTCTGGAATTTGAGGATAACACACAGGTGGCAGTGAAG  
ACACACAACATGTTTGAACGTGGGAAGTGGAGATGTGCCAATGAAGTGAATAGCCTTTCT  
GAACCTATCCATAAGAACATTATCAATCTGTTGGGTTTCTGCTATGAGATGGACGCTGTA  
ATATTGGTTTATGAATTGATCGAGCGAGGGCACCTCTGCAACATTCTCCACGGCAATGAT  
ACTAAAAGATTCCCTCTCCCACTAGATTTACGTCTAGACATTGCTATTGGGTTGGCAGAA  
GGATTGTCTATATGCATAGTAGATCAAAACCCATACTACATGGAAACATAAGAACAGTC  
ACTGTACTTCTCGAGACAAAATTTGTCCCAAAGATATCGGGTTTTGGGTGATCAAAGATT  
GGTGAAGATGGTAAATGCAGGATTGTGGGAGCGAGATGGGCTACATGGATGAAACATTCT  
GTTAATACCAGAGTTCTCACACGGAAGAGCGATGTCTATAGTTTTGGAGTTGTTCTTTG  
GAACTGATTACCAGGAAACGAATTTATTATAATGGTAAGGACAATAATACTGCCATCAAT  
TTTGCCAAAGTTTATGAGAAAGAGGGCAGTGGGAGGGCTATGTTTGACAATGAGATCAGT  
GCTGACAAAAATATCCCTACCCTCGAAGACATTGGCATTCTAGCAATGAAGTGCTTCAAT  
CCGGACATAGATAAGCGCCCTGAAATGAAAGAAGTATGCGAACAACCTGTTGATGCTTAAA  
AGGTCTAGTAAGAAGGGCAAAGGAAAAATATAA

>OsWAK102, 3178.t00025, Chromosome 10, post-processing  
ATGGATCTTCAAAAAACAAGCATAATGAATTCATCGAAAAGCCAAAATGGATAGAGGAC  
AACATTTCTAATATAAAGGCATTACGAAAGAAGATATAAAAGGAATTACCAGTAACCTAC  
AGCAAAAGGCTTGGAATGGTAAACTCGGAAAAGTTTACAAGGGTATTCTTGATGATAAC  
CATGCTGTTGTGGTGAAGAAGTATATTCATATGGATTCTGAAGAAGAGTTTGCTAAAGAA  
GTAATTGTCCATAGTCAAATCAACCATAAGAATATAGTCAGGCTTATCGGCTATTGTACT  
GAGAAAAATAATCTAATGATGGTCATGGAGTATATGTCTAATGGAGACCTTGATTACCAT  
CTTCATGTCAAGAATAGCCTCGATTCTATTGGACATAAGATTGAACATTGCTATAGATTGT  
GCAGATGCTCTAGGGTATATGCATTCCATGTGCAGCCCTGTTTTACATGGTGATGTCAAG  
CCCTCCAACATTTCTTAGATGACAGTTTTAATGCAAAAATATCAGATTTTGGAATATCT  
AGGCTTCTCTCAACAGACAAAACCTCATACTGAAAATATGATTACATGTTATATGGACCCT  
CTGTATTACCAGGAGGGGCGTCTCACCTCAAAAAGTGATGTTTATAGTTTTGGAATTGTT  
CTAATGGAACATAATCACCAGAAAAGGGCTACATGTCTCACTCAAGCTCTTGCTGAAGGA  
CAAGAGATGACAGAATTGCTTGATCCTATGATTGCTAATGAGAGCAACATGAAGGTTCTA  
CTGGAGATTGAAAACATAGTGCAGGAATGCCTAGCAGAGGATATTGATAGACGCCCTGAT  
ATATGTGATGTGGCTGCATACCTTCGGATGCTTAGGAAGATGAGTCAACAAGCACCACAA  
GAAAATTTTGGTTGGCACTTGTTTGAGAAACACAAAATGATTTTAAAAAGCAAAGCCAT

OsWAKs-Supplemental Data 1[1].txt

CAAGGTACAAACATTATCAGCTCTATCAAGATGGTGTTCCTAGGATGATGGGCATTCTC  
AACGTGAACATGGCCAAATCTGAAAACAAAGGAACCTCCGCTCTATGTTAGTGGCAAAAGA  
ATATTCACAGCATTGGAAATAAAGAAAATAACAGGAAACTATTCAAGAATTATCGGTAAA  
GATATGTTTACTGTGGTCTACTCTGGAATTCTTGAGGATAACACACAGGTGGCAGTGAAG  
ACACACAACATGTTTGAACGTGGGAAGTGGAGATGTGCCAATGAAGTGAATAGCCTTTCT  
GAACCTTATCCATAAGAACATTATCAATCTGTTGGGTTTCTGCTATGAGATGGACGCTGTA  
ATATTGGTTTATGAATTGATCGAGCGAGGGCACCTCTGCAACATTCTCCACGGCAATGAT  
ACTAAAAGATTCCCTCTCCCACTAGATTTACGTCTAGACATTGCTATTGGGTTGGCAGAA  
GGATTGTCATATATGCATAGTAGATCAAAACCCATACTACATGGAACATAAGAACAGTC  
ACTGTACTTCTCGACGACAAATTTGTCCCAAAGATATCGGGTTTTGGGTCTCAAAGATT  
GGTGAAGATGGTAAATGCAGGATTGTGGGAGCGAGATGGGCTACATGGATGAAACATTC  
GTTAATACCAGAGTTCTCACACGGAAGAGCGATGTCTATAGTTTTGGAGTTGTTCTCTTG  
GAAGTATTACCAGGAAACGAATTTATTATAATGGTAAGGACAATAATACTGCCATCAAT  
TTTGCCAAAGTTTATGAGAAAGAGGGCAGTGGGAGGGCTATGTTTGACAATGAGATCAGT  
GCTGACAAAAATATCCCTACCCTCGAAGACATTGGCATTCTAGCAATGAAGTGCTTCAAT  
CCGGACATAGATAAGCGCCCTGAAATGAAAGAAGTATGCGAACAACCTGTTGATGCTTAA  
AGGTCTAGTAAGAAGGGCAAAGGAAAAATATAA

>OsWAK103, 3970. t00002, Chromosome 10, pre-processing  
ATGGCATTCTGGCTACTTGCAGACCTGCTGATTCTTCTAGCTTCCGCCGCCGAGAGCGTC  
GCCGGCCAGCCTGCTGCCAGTTGCCAGGCTAGGTGCGGCGACATCGACATTCCTACCCG  
TTCGGCATCGGCCCAATTGCTCTCGCGGAAAGGGATTTGAGATCGCATGCAATCCCCGA  
AACGACAGCGGCGAGATGGTGCCGACCCTTGCCGCCGCCAATGGCACCATCCATGTGCAG  
AGCCTGTTGGTAGCGCCGATCCCGGAGGTCAAGGTGATGCTGCCGGTGGCGTACCAGTGC  
TACTACTCCAACAACAGCATCACCGACTCGTTCTACGGCGAGGTAGACCTCAACAACACA  
GGCGTGACCGCATCTCCGACAGCCGCAACATGTTCTGTCGTGATTGGGTGCAACACCCTG  
TCTACACCCAGAACCGGAACAGCGCGGCAAAAGGCCCTTACGCCGGCCTCTACTACACC  
GGCTGCGTCTCCTACTGTAACGACTCGTCGAGCGCGCGGACAGCATGTGCGCCGGCGTC  
GGCTGCTGCCACATCGACATCTCGCCGGGCCTCAGTGACAACGTTGTCTCCTTCGGGCCC  
TGGAAGCGTGGCTTCCAGGTAGACTTCAGCCCCTGCGACTACTCCTTCCTCGTCGACAAG  
AACGAGTACGAGTTCGCTAGCGCCGACCTCAAGATGGACCTCAACCGAACCATGCCGGTG  
TGGTGGACTGGGCCATCCGCGACTCCGTTACCTGCCCTCCACTGGAGGTGCAGGAGAAG  
AAACCGGTGGGTACGCGTGTATGAGCGACAACAGCGAGTGCGTCAACTCCACCAACGGT  
CCCGGATACTACTGCAAGTGAAGCAAGGCTACGATGGTAACCCCTACGTGACAAGGAC  
CAAGGTTGCAAGGGTAAGATTAATGTTTTTATTTTATTACTCCTAGTTAACAGTTTTGCT  
AAATATATAGTGCCACCATTTTATTTTACCTTTCGTTGTGTGCACCAACCCTGTTGGTG  
TTTAAATTCATTAATAATTTTTTTTTACCAGGTTTCATTTGATCTTTTCACTATTTGAT  
GTAGCGCAAAAAAAGTGAACGATTTGTGATTTTATAGTAAAGCATCTATATATACAC  
GGCGGTGTGTGCAAGTTTCAAGTTGCGTAATTTGCGTGTGTGTGATATATAGGATT  
TGAACGGGAACCTGTTCTTCAAGTAGCGTCTTACCATCTCACCTATAAAGAACTTTGTG  
CATGCGGGAGAGATGCTTATTCTTTGACTTCGCCCCTCTAAACTTGTAAATATATAAT  
TGCACTATAAATGATATCAAAAGGAAAATTTATCAACCACAAACTTGTAGATCACATTGA  
GCTCTACAATTTGATATAGAGCACAGCTCCATCTGAGTTCATTTAAAAACATAAAAGTT  
TGTTTATTTCAACAATAGATTTGAGATTTTGTAAAGTATCAGGACCCGTAAAAAGTCTC  
GAATGAAAAAATCAACTATATAGTTGTAGAGCTCTCAATTTTCAAAAAAGATTTT  
CATCATACGACTTCATATATATCAAGATACTACTCCTTTCCTATTGTAGTAGTGCTATTA  
TTTTTAAGGGTGGTATTTTCAAGAGAACCCTCAAAAGTTAATTTTTCGTGCCTTTCC  
ATATAAGAATTGCCAAAAAATGACATTTATGTAGGAAGCCCCTGAAAAAACTTGTAAAT  
TCTATGAAAAATGTCTAACTTTTAAAGATTTATGGAAAGTTTCAATTTAAGTTCAAATGAGG  
TGAACCAAAGTTATATATGACCTTACAATATTTTTTATTTATATTTCTGTTAGTATAA  
TTGTTTACTTATCATTTACCTCTATATGAGTTGGTATGTTATCTAACGTGACATTAGTGA  
ATGACCATACTAAAAGAAATGTTCTAAGAAAAATATTAATAAGTTTTACTATAAGAAGT  
ACTAGAACGATCTCGGAGAACTTTAGTTTACCTCAATAGGACTTAAATGAATTATCTAT  
AAATTTCTAAAATTTTGATTTCTTAAAGAACTGCTTATACAAAAATAGATACTAGAGCTT  
ATAAAGATATTTACTCAAAGTTGTAGATCTAGTTAAGCTCTACAATTTTAAATATAGAAT  
GTCTTTATCCAAGATCGTTTGAATACTCAAAAGTTTCGTTTTCAAAAAATAGATCTGAGAG  
TTTGTAAGAAAGAAATAGATCTAAACGTATTATCCAAAATGTTGAAAAAAAGTTTCAATGTA  
GATTTTCGTGAAGAGCGACAATTTTTATAGCGGTTTCTAAGAATTTGCCAGTTAAAAAA  
TATTTTATACGTGGTTTATAATCCTGGACAGCCGAAGCCATCTTCACACAGGTGATTTTC  
ATTTTGAGTTGCCTGTCAAGAGAAAAATAAAAAAGAAGCCTAAGCCTACGATTTTTTTTTAC  
TAGTGACAGTTGATCTAACGATAATATATATGATCCTTTTTATATGCACAGACATCAAC  
GAGTGTGATGTGTCACAAAGAAGAAATATCCCTGCTACGGCGTCTGCAACAACATCCCA  
GGGGATTATGAGTGCCACTGCCGTGTAGGATACCAGTGGAGTGGTGAAGGCCCCAAGAAA

OsWAKs-Supplemental Data 1[1].txt

CAAGAGTGCAGCGCAAAATTCCTCTTGCAGCAAGGCTTGCCCTTGGTACATATGCACCT  
CAGCATTTTTTAAAAAATATAAAATAATATACTATATATATGTCACATTGAGTTTACA  
CCAATTCAATGATTTCCATTGACTATGTTTTAATTGTTTCTACAATATACCATTCAAC  
CAAACAAAGAATTTCTTATAATGCCTAAAAATATAAGGGTTGACAGTTAATTGAAAAAAC  
TAAAGAAAAACAACAATTTTAAAAAATTAGCCTCCTAGCACATGATATAAGAATATAAGT  
GTGTATAAGTTTCATGCTTTTTGCATTTTATTATTTTTTGTAAAATATAATATGTCTGTT  
ATTTACATAGACTACTTTTTCTGCATCGTTTGATATTTTTTATACAAATCATCTTTTCATGT  
GCTACACAAAATTTTTTGTATTTTTGTTTGAAGTGATTTCTCTCTAATGCCACATAGA  
ATGACTTTTTCAAAAAAATACATGCAAGAAATTTTGAACATAAAACAGAAAATTGTATAT  
TGTGTAAGGAACTGCACTAAAGATTAGTTACAGCAATATATTGTGCAGCCAATATTAA  
TATAACATTAGTTGTTTACAATAATATTTATCAAATAAAATGAGCCTTCATTCACTACTCC  
CTCTACCCAAAATATAAGGCACAACCACTTTTTTCCATGTCTCACAATATAAGGCTTGC  
ATACATTAGCCATCACCTCTTGGTTCTTTAAATTTGGTTTATTTTAAATCATCTACCGTT  
AAATCCTCCAATCAAATTTGCTTGCATGTATGGATGTGATCCAATCAAGAAGGTGATTAAA  
TTATTTCTTGGTCTTTGTGTTATGAGTGTTGAGCCTTATATTTTGGGATAGAGGGAGTA  
TTTCTATTAATAAATAATACTGCAACTCATATATGGATTTGTTATGTTTGCTAATAAGTT  
TTTTTTAACTTTTCGTAGGAATCACTTTGGGATTTTCTTCTAATTGTTGCTGTTCTTTT  
CACGCTAATGATGCACAAAAAGCGAAAAATGAATGAATATTTCAAAAAGAATGGTGGTTC  
AGTGCTACAGAAAGTGGACAATATCAAGATTTTCAACAAAGATGAGCTAAAGAAAATCAC  
AAAGAATAATTCAGAAGTTCTTGGTCAAGGAAGCTTTGGTAAGGTGTACAAAGGGACTCT  
TGAAGACAATACTCCGGTTGCAGTGAAGACGTCAATCGAAGTAAATGAAGCTCGAAAGGA  
TGATTTACAAATGAAGTGATCATCCAATCGCAAATGATGCATAATAACATTATCAAGCT  
TTTGGGTTGTTGCTTGGAGTGGATGTTCCAATGTTGGTGTATGAGTTTGCCGCTAAGGG  
GAATCTGCAAGACATTCTCCATGGTGATGCCAACATCCCTCTCCCGTTGGGCTTACGCCT  
AGACATCGCAATTGAATCAGCTGAAGGTCTAAGGTACATGCACTCATCAACAAGTCGTAC  
CATACGACATGGTGATGTCAAGCCGGCCAACATACTTTTAAACAGATAAGTTTATCCCCAA  
GATCTCAGATTTTGGAACATCTAAGCTTCTTAATGTAGACAAAGATTTTACCATGTTTGT  
TGTAAGGAAGTATGGGCTACATAGATCCAGTATTCCATAAGACCGGCCATTTAACACAAAA  
GAGTGATGTATACAGTTTTTGGAGTTGACTGCTAGAGCTCATATGTAGAAAGCCAACAAT  
ATATGGTGAAAATTGTAGCCTCATCATTGAGTTCCAAAATGCCTATGATCAAGAGAACAG  
TGGGAGGATAATGTTTCGACAAGGAGATTGCAAATGAAGAAGATATCCTAATCCTAGAAGA  
AATTGGCAGGTTGGCAATGGAGTGTTTGAAGAAAAGGTTGAAGAGCGACCTGATATGAA  
GGAGGTAGCAGAACGATTTGTTATGCTGAGAAGATCAAGGAAGTGTGGATAG

>OsWAK103, 3970.t00002, Chromosome 10, post-processing  
ATGGCATTCTGGCTACTTGCAGACCTGCTGATTCTTCTAGCTTCCGCCGCCGAGAGCGTC  
GCCGGCCAGCCTGCTGCCAGTTGCCAGGCTAGGTGCGGCGACATCGACATTCCCTACCCG  
TTCCGCATCGGCCCAATTGCTCTCGCGAAAGGATTTGAGATCGCATGCAATCCCCGA  
AACGACAGCGCGCAGATGGTGGCAGCCTTGGCGCGCAATGGCACCATCCATGTGCAG  
AGCCTGTTGGTAGCGCCGATCCCGGAGGTCAAGGTGATGCTGCCGGTGGCGTACCAGTGC  
TACTACTCCAACAACAGCATCACCGACTCGTTCTACGGCGAGGTAGACCTCAACAACACA  
GGCGTGATACCGCATCTCCGACAGCCGCAACATGTTCTGTCGTGATTGGGTGCAACACCCTG  
TCCTACACCCAGAACGGGAACAGCGCGGCAAGGCCCTTACGCCGGCCTCTACTACACC  
GGCTGCGTCTCCTACTGTCAAGACTCGTCGAGCGCGCGGACAGCATGTGCGCCGGCGT  
GGCTGCTGCCACATCGACATCTCGCCGGGCTCAGTGACAACGTTGTCTCCTTCGGGCC  
TGGAAGCGTGGCTTCCAGGTAGACTTCAGCCCTGCGACTACTCCTTCTCGTCGACAAG  
AACGAGTACGAGTTCCGTAGCGCCGACCTCAAGATGGACCTCAACCGAACCATGCCGGTG  
TGGCTGGACTGGGCCATCCGCGACTCCGTTACCTGCCCTCCACTGGAGGTGCAGGAGAAG  
AAACCGGCTGGGTACGCGTGTATGAGCGACAACAGCGAGTGCGTCAACTCCACCAACGGT  
CCCGATACTACTGCAAGTGCAAGCAAGGCTACGATGGTAACCCCTACGTGACAAGGAC  
CAAGGTTGCAAGGACATCAACGAGTGTGATGTGTCCAACAAGAAGAAATATCCCTGCTAC  
GGCGTCTGCAACAACATCCAGGGGATTATGAGTGCCACTGCCGTGTAGGATACCAGTGG  
AGTGGTGAAGGCCCAAGAAACAAGAGTGACGCGCAAAATTCCTCTTGCAGCAAGGCTT  
GCCCTTGAATCACTTTGGGATTTTCTTCTAATTGTTGCTGTTCTTTTACGCTAATG  
ATGCACAAAAAGCGAAAATGAATGAATATTTCAAAAAGAATGGTGGTTCAGTGCTACAG  
AAAGTGGACAATATCAAGATTTTCAACAAAGATGAGCTAAAGAAAATCACAAGAATAAT  
TCAGAAGTTCTTGGTCAAGGAAGCTTTGGTAAGGTGTACAAAGGGACTCTTGAAGACAAT  
ACTCCGGTTGCAGTGAAGACGTCAATCGAAGTAAATGAAGCTCGAAAGGATGATTTTACA  
AATGAAGTGATCATCCAATCGCAAATGATGCATAATAACATTATCAAGCTTTTGGGTTGT  
TGCTTGAAGTGGATGTTCCAATGTTGGTGTATGAGTTTGCCGCTAAGGGGAATCTGCAA  
GACATTTCCATGGTGATGCCAACATCCCTCTCCCGTTGGGCTTACGCCTAGACATCGCA  
ATTGAATCAGCTGAAGGTCTAAGGTACATGCACTCATCAACAAGTCGTACCATACGACAT  
GGTGATGTCAAGCCGGCCAACATACTTTTAAACAGATAAGTTTATCCCCAAGATCTCAGAT

OsWAKs-Supplemental Data 1[1].txt

TTTGGAAACATCTAAGCTTCTTAATGTAGACAAAGATTTTACCATGTTTGTGTAGGAAGT  
ATGGGCTACATAGATCCAGTATTCCATAAGACCGGCCATTTAACACAAAAGAGTGATGTA  
TACAGTTTTTGAGTTGTACTGCTAGAGCTCATATGTAGAAAGCCAACAATATATGGTGAA  
AATTGTAGCCTCATCATTGAGTTCCAAAATGCCTATGATCAAGAGAACAGTGGGAGGATA  
ATGTTTCGACAAGGAGATTGCAATGAAGAAGATATCCTAATCCTAGAAGAAATTGGCAGG  
TTGGCAATGGAGTGTGTTGAAAGAAAAGGTTGAAGAGCGACCTGATATGAAGGAGGTAGCA  
GAACGATTTGTTATGCTGAGAAGATCAAGGAAGTGTGGATAG

>OsWAK104, 3970.t00008, Chromosome 10, pre-processing

ATGGCATTCTGGCTACTTGCAGACCTGCTGATTCTTCTGGCTTCTGCCGCGGAGAGCATC  
TCCGGCCGGCTGCCGCCGTTGCCAGACACGGTGCGGTGACGTGACGATCCCCTACCCG  
TTCGGCATCGGCCCACTGCTCCCATGGGAAGGGCTTCGAGATCGCCTGCGATACCCGA  
ACCCGAAACGGCAGCGGCGAGTTGGTGCCGACCCTCGCCGCCGCAATGGCACCATCCAT  
GTGCAGAGCCTGTTTGTAGCGCGGATCCCGGAGGTCAAGGTGATGCTGCCGGTGGCGTAC  
CAGTGCTACAACCTCCAGCGACAGCGTCACCGAGAGTTTCTTCGGCGCGGTAGACCTCAAC  
AACAACGGCGTGTACCGCATCTCCGACAAGCGCAACATGTTCTGTCGTCCTCGGCTGCAAC  
ACCATGGCCTACACGAACAACGGGGACAGTCATGGCAAAGGCCCTTACGCCGGCCTCTAC  
TACACCGGCTGCGTCTCCTATTGCAACGACTCGTCGAGCGCGCAGGACGGCATGTGCGCC  
GGCATCGGCTGCTGCCATGTGACATCTCGCCGGGCTCAGTGACAACGTGCTCACCTTC  
GGCGAGTGGTCACGCTATTTCCAGGTGGACTTCAACCCCTGCAACTACGCCTTCCTCGTC  
GCCAAGGACGAATACAACCTTCCAGAGGTGAGATCTCCAAAAGGACCTCAACCGGACCAAG  
CCGGTGTGGCTGGACTGGGCGATCCGCGACGGCGGCAACTCCTCCGCATCATCGTCTGTC  
CCTGCGCCGGAGGTGAGGGAGAAGATGCCGCTGAGTACGCCTGTGTGAGCGACAACAGC  
GAATGCGTCAACTCCACCAATGGCCAGGATACTACTGCAAGTGCAGCAAAGGCTACGAG  
GGCAACCCCTACCTAGTCGGAGGTTGCAACGGTAAGAACACGTACACGAGACAAACAATC  
TACTCTTTCCTACTCGCTATCTTTCATATTGTTAGACATTTTAAATTTTTAGGCCTACTA  
CCGAATGCTACACAGTTCTAATGAAATAGCTCATATGTGCTGACGATATCTTAGGTACCA  
CAGGTACCAAACACGATACTCATAGATACCATACTTTGATATCTGGGTATTATAATAACG  
TCAGTATGGTACCTACAATACTAGATTTGATATCGGGTATCAAACATGATATCTCATAAG  
TATCAAATCATGATACCTACCTAACATACTGATTTCAACTATATCGTTTTGAACGGTATTG  
CCATTTTATAGTATTTTTGTTAATTTTTCAAAGTCAAACTTTTCTTACGTTTGACAAAA  
TTAGTTTTAAAAAATAGCAACATTTATAATACCAAATCAAATGTGTTATATTATGAAA  
TAGAGGGGATTTGAGTTTGCACTATTGTGCACTCCACGCTAGTCATGCCATCTATGTCT  
GTTTACCAATACAATTTTTTTTTAAAAAATTCAAATTAAGTTATTTGTACACCCGCCATT  
GAATCGAACAGTATATATGCAGATATTGATGAGTGCCTCGCTCGGATGAATATCCCTGC  
CACGGGGACTGCAGAAACACCGTAGGAGATTATCACTGCAAATGTGCGACAGGTTACCAG  
CCTAGAGGAGCGGTCCTCAAGATAGACGAGTGCAGCCAAAAGTTCCTCTACCTGCACAA  
ATTGATCTCGGTATGTCCTTCCAACCAAAGTATTTCTTTTATAGGAGGAACCAAAGTAC  
TTTGTTTCATTCTAAAATTTGAAATATCTAGACGCTAAAATAATTTGTTGAAAACGGTG  
TACTAAATTAAGATGCTCCCTTGCAATATATATACTCGCAAGACTATACTTGATATATCC  
ATTTAATTCATGCGGCTTAACGCTTTTGTTCATGTTTATTCAAAGTAGAAAATAAGA  
GCATAAAAGGAATAATTAAGCAAAACCTAATTAAGAGGATGGAAAAGATTGAGCCAAG  
ATCAAATATGCGGCAGGCTGTATATGTATTTCCAAAACAACATGAAGTGAACAAAT  
GGAGTATATAAAATCAATTAATGAAAAACAAATTTGTTAATTCATACTCTACAGTGAG  
CATCTTTTTCTATGAGATGTACAAGGAAGGTGTAATATAGTCATTCTGAAAAGAACTA  
ACGGTAAATTCACGTAGTCAACTATTTCAACTCCTAGCTTACATCTGGAGATGACTCCGC  
ATTAAGTATATCGGACGCCCACCCAGCCTGCATATATATGGTAAGCACGGCTGGGCTCA  
GATCCTGCAGAGTGGCAGATTGGCCTCACCAATCGCCTTTTGTTCATCTAATATGCGT  
AGTCGCCCCCTCGTATGATTATACTTTGAATTTTGTAGTTATTTGTGATCGTTTGCATTA  
ATATATACATAAAATGATTGTTGATATGATTTTGGATATATTTTAACATGTTCTTCTAGA  
TTTATATATAAAATTAACCTTATTTTAGTATGGAGAGTGTATGTCCGAGTCCGAATATAC  
TTTAATGTAGCATAAAAAGAATCATTTTTAAACCATGTCACTAAATAGCACCAACACTAC  
TCAGTACTTGAATGACATGACATCATTTCTATTCATCCTTTTTAGTTTTGGAGACTTGCA  
GCCACATCCCTTAGCTATGTCAATTAACCTCAGGTGGATAGCTAGATATAGACAATAATT  
AATGAGCGAATTGTATTGATTAGATGGCTAATCACCCGAAGGTTTGCATGCAGCGCATGG  
GGATAGGGGTGCGGGGACCCCTGGCACCTCGGTGGCTTCGCCACTGCTTCTCACGG  
CCCGATGTTGTGCAATTGTGATGGAGCCCACCCGACCTATCTATCATGCATTCTTTTTTC  
ACTTTTTCTTATGCGTATACATTGTTTTATATCAAATTTTAAATAATATTGTATCGAAAAG  
TGCATATCCAATCTACCAATCTACCATTTGATTACATTATTATTTGTTATAATCAAAA  
CATTTTAGAAAGATCTCACACAATTATACTTTGATAAAGAATTATCCATTGTTTACAAT  
TTATAGAAAATTAATGCTATCACGTGTGCAATGTTTCAACTCACCTCATTATTTAAGAGG  
AATGAAATATATAACATATTACAACAAACATTACATATATATCAACGAGTGAAACATA  
AACAACAAAATTCATATGATAAATATATGTTTGCAATACTTAATTTTATAGGAGGTGTA

OsWAKs-Supplemental Data 1[1].txt

GATTAGAGCTGTCATACATACACACACGTACACATATATTTGGGGCGTATAAAAAAATAG  
GAGTTTCATACACATATAATATACGTATAATTTTTTTTGTATGTATACGTTTCAAGTAAGT  
ACCCCATACCGCCGTATGTAGATCTCGCATTAGCGTTTTAGGATGTCACCTGCCCCAAAG  
TGAGGGATTGCTTGTAGAGAAACGTGAGGAGCAGAACTGACATTTGTTTCAAGTCAAACATT  
ATTAACACATTTCGATAGAACAGTGTGAGCCCTTATAACAGCGGATTAGTGGAAAATATG  
CCAGCTGCACTTCAATGACATTTAATATGGGGAATATTTTAACTGTTTGTCACTTTAAAA  
AAAATGTCACAACCTCATATACTACGGCTGTGTTAGATCTAAAGTTTGGATCCAAATTTT  
AGTCCTTTTTTTCATCATATCAACTTGTACATACACAACCTTTTCACTCACATCATCTCCAA  
TTTTCAACCAAAATCCAAACTTTTTACTTTTTATGATAAGTAATTTTTTCACTCTTTGCTGAC  
ATGCATGGCATGCCAGCCTGCACTCCCACGGTGGACAAGACGTGTGAAATGTTTATCTTA  
CCCCTCGTGAACCCTACAAGTCAGCTGTATCTTTTGTCTCTATCAGTATAGATGGCCA  
AAGGGCCCGCCCGGCACGGCCCGCCAGGCACGGCTGGGCACGGCCAGCAGCCATCGG  
GCCGGCACGGCCCGCCCATGGGCTGCACCTCCTGCCAGGCACGACCTACCAGCTGTGCG  
GCCGTGCCGTGCTGGCCGAAGGCATGGGTGGCCCATCGGGCTTTTTAAAATAAGTCTA  
TTTTTTTTCCCTCCTCTCTAGGCTATTTTCATTTGTATAGCTAAAATAAGTCTATTTTTCCG  
TCCCTCCTCTTTGGGCTGTCTGTATAGCTAAAATAAGTCTATTTTTCTGTCCCTCCTC  
TTTGGCTGACATATGTATAGATAATAAAAGTCTATTTTAGATCCCTATGCTTTTCGTTTAT  
GGCATATAATGTCTATTTTTTACTCCCTATTTTTTTGTGTATCGGGCCTAGCTGCCGGCC  
CATCGTGCCGGGCGGGCCCGGGCGGTGCCGGGCGGGCCGGCACGGGCGGGCCCTCCGTGCG  
GGCCGTGCCGTGCTTTGGCCGGGCAAAATACCGTGCCATGGGCTGGGCCATCGGGCCTC  
GGGCTTTTTGGCCATCTATATCTGTGAGTGATCCATCCAGGAAATTAAGCACCTTCTTG  
TCGTCCGAGTTGACAGCGATGGGCTGGGTTGCTGCCGCTGGAATAGGCCAAAAAAGGCT  
GAAACATCCATGGTAGCAAATAGATAAAATTAACAGAGAAAACCTAGACAACGGTATCCC  
GTTGTAACGGGATACTCTTCTATGAGACAGTACATATACCTGATACATGTTGTGGTATCA  
ACTACATGGTACCCGATACCTGCGATACCTGTTATCTGGTACCTATGATACCTAGGACCT  
GATACCTGTGATACTCGTGCAAGAGAATAGTTAATATGTCTATCCCGTTGTAACGGGATC  
CCGTTTTGTAGCAGCCCTCTAAAATTAAGGACTGCGTGGAGCACACAAATGCTAAATTA  
ATTAAGCCAAGTTTCGATAGATAAATGCAATTCACCGTTGTTTTTTAATTGGTTGGTTGA  
AATGAAAAGGCAGGGAGCTGAACCATTGCAATTTTTTTTTTTCATACACAAAATTTTCAG  
AAATGGATATGGAAGCTTTTTTTCATATATCGTTAGGGTTTTTATCAAATATGCCTGGATAG  
TTTCAATGGACAAATGGATCAACTGGAGCAAAGTATTCGCACTAGTAACCGGGAACATAT  
CCTATGCACACTCCGTGCATACCAACTAGCAAATGCCACGAAAATTCTACAAAACATTAT  
ACACATACTTCGAATAATATTACACCTATATGTGAAATTTTATCTTCAAATTCATTATAT  
TTTGGTCTGATAAAAAAAGACAAAATTCTGACACATTTTTTAATTACCTAGAAAACCTGTCA  
GATTTTTTTTTTGTACGGCTAAAATATAATGAACCTTGAATATGAGACTTTATATATATGTG  
TAGTACTAATAGGAGTAAATGTTTAAATTTATAGAATTTTTCGTGATATTTGTTAGTTGG  
TGCGCACGAGAAACATGTGTACATAGAATATGTTTCTGGTAACCATATATGATCTTTAGT  
GAGTTACAAATATCTCACTATTTTTCATATTTTTTTCATTCTAGGAAAAAAAACAATTCTT  
TAGCTTTTGCATGTGAGTGTGATGATGCAATATATATATAAACATTACACTGTTGATATAT  
AGTAATATATATTCATCTCAAGTGAGCATTGTTATTATTTTCTATTATAAGTTGATAAC  
AACAAAATCACAAGTCAAATGTATTTGTTATCGTTGCTAATGAGAACTTATGATCTTTGT  
AGGCATAAGCCTGGGATTTTCTTTCCTGATAGTTGCTGCACTTTTTACTCTAATGATGCT  
CCAAAAGAGAAAAATTAATGAGTATTTCAAAAAGAATGGTGGTTCAATTCTACAGAAAGT  
GGCAATATCATGATTTTCTCAAAGATGATCTAAAGAAAATCACAAGAACAATTCACA  
CGTTATTGGCCAAGGAGGTTTTGGTAAAGTGTTCAAAGGGACGCTTGAAGATAATACAAT  
GGTGGCAGTGAAGACTTCAATTGAGGTAATGAAGCTCGGAAGGAGGATTTACAAATGA  
AGTTATAATACAATCGCAATGATGCACAATAACATTATCAAGCTATTGGGTTGTTGCTT  
GGAGGTGGATGTTCCAATGTTAGTGTATGAGTTTGGCGCTAATGGGAGTCTGCAAGACAT  
TCTCCATGGTGTGATGCAATCGCTCACTCCTTCTCACACTAGACATACGCTTGGACATTGC  
AATTGAATCTGCAGAAGGTCTAAAATACATGCACCTCGTCCACAAATTGTACCATACGACA  
TGGTGATGTCAAGCCTGCCAATATACTTTTAAACAGACAAGTTTCGTCCCTAAGATCTCAGA  
CTTTGGGACATCCAAGCTTCTTACAGTAGATAAAGACTTACCATTGTTTGTGTTGGGAG  
CATGGGATACATAGACCCAATATTCCATAAGACTGGTTCGTTTAAACGCAGAAAAGTGTATG  
TTATAGTTTTTGGTGTGTTGTTGCTAGAGCTCATTAGTAGAAAAGCCAATATATATGGCGA  
GAACCTTTAGCCTCATCATCGAGTTCCAGAAGGCCTATGATGAAGTACACAGTGGGAGGGC  
AATGTTTTGATAAGGAGATCGCGTGGAAGAAGATATCTTTATCTTGGAAAGAAATTGGTAA  
GTTGGCAATGGAGTGTCTAAAAGAAAAGGTTGAAGAACGACCTGATATGAAGGAAGTAGC  
AGAACGACTTGTGATGTTGCGAAGAGCCAGAAAGCATGGACAAGGAAGCTATAATTTGAG  
TCCTAGACACCATGAGGAGATTAGTATTGAAACAACCTCTACGAGTTTTTGGTGCTGATTT  
TAGCACAATAAGTAGTGTGAGTCTTTCTGCAACATGCACTCCAGAACGCAAGAAGTCTA  
CAAGCTATAG

OsWAKs-Supplemental Data 1[1].txt

ATGGCATTCTGGCTACTTGCAGACCTGCTGATTCTTCTGGCTTCTGCCGCGGAGAGCATC  
TCCGGCCGGCCTGCCGCGGTTGCCAGACACGGTGCGGTGACGTACGATCCCCTACCCG  
TTCGGCATCGGCCCAACTGCTCCCATGGGAAGGGCTTCGAGATCGCCTGCGATACCCGA  
ACCCGAAACGGCAGCGGCGAGTTGGTGCCGACCCTCGCCGCCGCAATGGCACCATCCAT  
GTGCAGAGCCTGTTTGTAGCGCCGATCCCGAGGTCAAGGTGATGCTGCCGGTGGCGTAC  
CAGTGCTACAACCTCCAGCGACAGCGTCACCGAGAGTTTCTTCGGCGCGGTAGACCTCAAC  
AACAACGGCGTGTACCGCATCTCCGACAAGCGCAACATGTTCTGTCGTCTCGGCTGCAAC  
ACCATGGCCTACACGAACAACGGGGACAGTCATGGCAAAGGCCCTTACGCCGGCCTCTAC  
TACACCGGCTGCGTCTCTATTGCAACGACTCGTCGAGCGCGCAGGACGGCATGTGCGCC  
GGCATCGGCTGCTGCCATGTGACATCTCGCCGGGCTCAGTGACAACGTGTCACCTTC  
GGCGAGTGGTCACGCTATTTCCAGGTGGACTTCAACCCCTGCAACTACGCTTCTCTGTC  
GCCAAGGACGAATACAACCTCCAGAGGTGAGATCTCCAAAAGGACCTCAACCGGACCAAG  
CCGGTGTGGCTGGACTGGGCGATCCGCGACGGCGGCAACTCCTCCGCATCATCGTCTGTC  
CCTGCGCCGGAGGTGAGGGAGAAGATGCCGCTGAGTACGCTGTGTGAGCGACAACAGC  
GAATGCGTCAACTCCCAATGGCCAGGATACTACTGCAAGTGCAGCAAAGGCTACGAG  
GGCAACCCCTACCTAGTCGGAGGTTGCAACGATATTGATGAGTGCCTCGCTCGGATGAA  
TATCCCTGCCACGGGGACTGCAGAAACACCGTAGGAGATTATCACTGCAATGTGCGACA  
GGTTACCAGCCTAGAGGAGGCGGTCCCAAGATAGACGAGTGCAGCCAAAAGTTCCCTCTA  
CCTGCACAAATTGCTCTCGGCATAAGCCTGGGATTTTCTTCTCTGATAGTTGCTGCACTT  
TTTACTCTAATGATGCTCCAAAAGAGAAAAATTAATGAGTATTTCAAAAAGAATGGTGGT  
TCAATTCTACAGAAAGTGACAATATCATGATTTTCTCCAAAGATGATCTAAAGAAAAATC  
ACAAAGAACAATTACACGTTATTGGCCAAGGAGGTTTTGGTAAAGTGTTCAAAGGGACG  
CTTGAAGATAATACAATGGTGGCAGTGAAGACTTCAATTGAGGTAAATGAAGCTCGGAAG  
GAGGATTTACAAATGAAGTTATAATACAATCGCGAATGATGCACAATAACATTATCAAG  
CTATTGGGTTGTTGCTTGGAGGTGGATGTTCCAATGTTAGTGTATGAGTTTGCCGCTAAT  
GGGAGTCTGCAAGACATTCTCCATGGTGTATGCCAATCGCTCACTCCTTCTCACACTAGAC  
ATACGCTTGGACATTGCAATTGAATCTGCAGAAGGTCTAAAATACATGCACTCGTCCACA  
AATTGTACCATACGACATGGTGTATGTCAGCCTGCCAATATACTTTTAACAGACAAGTTC  
GTCCCTAAGATCTCAGACTTTGGGACATCCAAGCTTCTTACAGTAGATAAAGACTTCACC  
ATGTTTGTGTTGGGAGCATGGGATACATAGACCCAATATTCCATAAGACTGGTCGTTTA  
ACGCAGAAAAGTGATGTTTATAGTTTTGGTGTGATTGCTAGAGCTCATTAGTAGAAAG  
CCAATATATATGGCGAGAACTTTAGCCTCATCATCGAGTTCCAGAAGGCCTATGATGAA  
GTACACAGTGGGAGGGCAATGTTTGATAAGGAGATCGCGGTGGAAGAAGATATCTTTATC  
TTGGAAGAAATTGGTAAGTTGGCAATGGAGTGTCTAAAAGAAAAGGTTGAAGAACGACCT  
GATATGAAGGAAGTAGCAGAACGACTTGTGATGTTGCGAAGAGCCAGAAAGCATGGACAA  
GGAAGCTATAATTTGAGTCTAGACACCATGAGGAGATTAGTATTGAAACAACCTCCTACG  
AGTTTTGGTGTGATTTTAGCACAAATAGTAGTGTGAGTCTTTCTGCAACATGCACTCCA  
GAACGCAAAGAACTCTACAAGCTATAG

>OsWAK105, 3970. t00013, Chromosome 10, pre-processing  
ATGGCCACATGCTGGCTACTTGCCAGCCTGCTGCTTTTGGCTTCCGCCGCGGCGACGAG  
AGCGTCGTACACCGGCCGGCCTGCCGGCTGCCAGGCTAGGTGCGGCGACGTGACATTTCC  
TACCGGTTCCGCATCGGCCCAACTGCTCCCGTGGGGAGGGCTTCGAGATCGCCTGCAAC  
ACCCGAAACGGCAACGGCGACCTGGTGCCGACCCTCGCCGCCGCAACGGCAGCATCCAT  
GTGCAGAGCCTGTCGGTGGAAACAGCTCCCGGAGGTGAAGGTGATGCTTCCCGTGGCGTAC  
AAGTGCTACGACGCCGGCGACAACGTACCCAGGAGGTTCTACGGCGATGTAGACCTCAAC  
AACAACGGCGTGTACCGCATCTCCGACAGCCGCAACATGTTCTGTTGTATCGGGTGAAC  
ACCCTGTCTACACACAGAATGGGAACAGCGGTGGCAGCAACACCCACTACAGCGGACTC  
TTCTACACCGGCTGCGTCACTACTGCAACGACTCCCGGAGCGCGCAGGATGGCCGGTGC  
GCCGGCGTCGGCTGCTGCCATGTGACATCTCGCCGGGCTCACCAGCAACGTGCTCTCC  
TTCGGGCCCTGGACGCGTGGCTTCCAGGTAGACTTCAGCCCCTGCGACTACTCCTTCTC  
GTCGACAAGAACGAGTACGAGTTCCGTAGCGCCGATCTCAAGATGGACCTCAACCGAACC  
ATGCCGGTGTGGCTGGACTGGGCCATCCGTGACTCCGTTACCTGCCCTCCACTGGAGGTG  
CAGGAGAAGAAACCGGCTGGGTACGCGTGTGTGAGCGACAACAGCGAGTGCCTCAACTCC  
ACCAACGGTCCCGGATACTACTGCAAGTGAAGCAAGGCTACGAGGGTAACCCCTACGAC  
AAGGACCAAGGTTGCAAGGTAAGATTAATGTTTTTATTTTATTAGCTAACAGTTTTGCT  
AAATAGTGCCACCATTTTACCTTTATTTTACCTTTCTGTTGTGTACATCAACCCTGTTGG  
TGTTTTAAATTCATTATCTAAAAAAATCTACCAGGTTTCATTTGATCTTTTCGCTATTTG  
ATTTAGGCGCAAAAAAAGGAAAAACATATTTTGTATTTTAGTAAGCAACTATATATACA  
CGGCCGCATGTGCAAGTTTACGAGTTGCGTAATTTTGACACGTGTGGTATATAGGAT  
TTGAACGGGGACCTCTTCTTCAAGTAGCGTCTTACCATCTCGCTATAAAGAACTTTGT  
GCATGTGGGAGAGATCTTTATTCTTTGACTTCGCTCTCTAAAACCTTGAATATATAAA  
TTGCACTATAAATGATATCAAAAGGAAAAATTTATCAACCACAAATTTGTAGATCACATCG



OsWAKs-Supplemental Data 1[1].txt

AGCTCTACAATTTTGATATAGGGAACAGCTCCATCTGAGTTCATTTAAAAACATAAAAGT  
 TTGTTTATTCAACAATAGATTTGAGATTTTCGTAAACGAATATCAGGACCCGTAAGTCT  
 CGAATGAAAAAACATTCAACTATATAGTTGTAGAGCTCTCAATTTTCATAAAAAAGATTT  
 TTTCATCATACGACTTCATATATATCAAGATACTACTCCTTCTCTATTGTAGTAGTGCTA  
 TTATTTTTAAGGGTGGTATTTTCAAGAGAACCGCTCAAAAGTTGATTTTTGCGAGCCTT  
 TCCATACGAGAATCGTCTAAAATGACATTTCTTTAGGAAGTCCATCTGAAAAAACTTGTT  
 ATTCTTTGAAAATGTCTAAACTTTAAAGATTTATGGAAAGTTTCATTTTAAAGTTCAAATGA  
 GGTGACCAAAGCTATATATGACCCTTACAATATTTTTCATTTATATTTATGTTAGTATAA  
 TTGTTTACTTATCATTTTACCTCTATATGAGTTGATATGTTATCTAACGTGACATTAGTGA  
 ATGACCATACTAAAAAAATGTTCTAAGAAAAATATTACTCCCTCCTTCTAGAATATAAG  
 CATATTTAGGGTTGGATATGGTTATTAAGAAAGTATGTAGAATTAATAGGGGACGGTTG  
 TGTTTGGATGAAAAGTGGAGCTCCATGGGAAATTTGAATGATAGGAGATTATGATTGCTT  
 GAGAAGAGAATATTGGTGTAGAAGTTGTTATATTTTGGGATAAAGATCTGGAGGCTCGAA  
 GTTGTTATATTTTGGGACGGAGGGAGTTACTAAGGTCATGTTTAAAGAACCAACACATGG  
 GAGATAAAGTTTTGGATTTTTGTGGCATGCTTTTCAAACGTCTAAACAGTGCGTTTTCGTG  
 TGAAAATTTTCTATATAAAAGTTGTTCAAATATCAGATTAATCCATTTTTTCATGTTTA  
 TAATAATTAAACTCAATTAATCACAAGTTATTACCACATTGTTTTACGTAAAACACTTA  
 ATCTTCATTTTTATCTTCATCTTCATCTTCAGGAGACTCAAACAGAGCCTAAGTCTTACT  
 AGAACGATCTTGGAGAACCTTAGTTAACCTCAATAGGACTTAAATGAATTTTCTATGAG  
 TTCTTAAAAATTTGATTTCTTAAAGAACCACTTATACAAAAATAGATACTAGAGCTTATA  
 AAAATATTTTACTAGTACAAAGTTGTAGATCTAGTTATGCTCTACAATTTTAAATATAGAAT  
 GTCTTCATCCAAGATCATTTGAAATACTCAAAAGTTTCATTTTCAAAAAATAGGTCTGAAGA  
 GTTTGTAACGAATATTTAGACATCTAAATGTACTATCTAAAATGGAAAGAAAACCTTTCAA  
 TGTAGATTTTCATGAAGAGCTACAAATTTTATAGGCGGTTTTTAAAGATTTGCCAATTAA  
 AAAATAGGTTTTTCATAGATGGTTTATAATCCTGGGACAGCCTAAGCCATCTTGACAGGTG  
 ATTTTCATTTTGGAGCTAGGTTCTGTCAAAAAGAAAAAGGAAAAAGAACCAAGCCTAC  
 GAAAATTAATCTTTTTTTTACTAGTAACAGTTGATCTAACAATAATATATATGCTCCCT  
 TTTATATGCACAGACATCAACGAGTGTGATGTGTCCAACAAGAAGAAATATCCCTGCTAC  
 GGTGTCTGCAACAACATCCAGGGGATTATGAATGCCACTGCCGTGTGGGTTACCAGTGG  
 AGTGGTGAAGGCCCAAGAAACAAGAGTGCAGCTCAAAATTCCTCTTGCAGCAAGGCTT  
 GCCCTAGGTACATATGCACCTCAAAATTTTAAAAAATATATGAAATAATATACTATATA  
 TATGCTTTGAGTTTACACCAATTCATGATTTCCCATCGACTATGTTTTTCAATTATTTT  
 TACAATTTACCATTGAGCCAAACAAGAAATTTCTTATAATGCCTAAAAATATAAGGGTTG  
 GCAGTTAATTGACAAAACATAAAAAAAATCAACAATTTAAAAAAATTAGCCTCCTAGCA  
 CATAATATAAGAATATAAGTTTGTATAAGTTTACGCTTTTTACATTTTATTATTTTTCT  
 ATAAAAATATAATATTTCTGTTATGTCTCACATAGTATACTTTTTCTGTGGTGTGTATTTT  
 TGTACAAATCATCTTTTATGTGCTACACAAAATATTTTTCATTTTTTTGTGTAAGTTATTT  
 CTCTCTAATGCCCAATGAAAGACTTTTTCAAAAAATACATGCAAGAAATTTTGAACATA  
 AACAGGAATTTCTATGTTGTGTAAGGAACTACACCAAAAAATTTTCAATAATTTTTTAAACG  
 TATAATGAGATAAATCAATTGTCAACCTTTGGATGCTTGTCTACAAGGTATTTTGAATTT  
 TTTTTTAAATGTTTATATATTGTAGAAACAATTGATAAATCCAGTGGCATATTGTAGAAA  
 GCGACAATATTGTTGGTAAACCATTGGAGCAATATAAACTAAGTGGTTTAAAGTAATCAT  
 AACCATCCCTTATTTATTTTCTTTACCAACTTACTCATCTCGGCCAATTCAAACATCCTT  
 ATTTAACTTCAAGTCCCTGCTAAGTATAAATAAAAAAGATTAGTTACAGGATATATTGAA  
 CATGCCAATATTAATATAACATTAGTTATTTCATAATAATATTTATCAAATAAAATGATCC  
 TTCATTTCATATTTCTGTTAAAAAAATAATACTGCAACTCATATATGGATTTGTTATGTTT  
 GCTAATAAGTTTTTCTTAACTTTCTGAGGCATCACTTTGGGATTTTCTTCTCTAATTGTT  
 GCTGTTCTTTTACGCTAATGATGCACCAAAAGCGAAAAATGAATGAATATTTCAAAAAG  
 AATGGTGGTTTCAAGTGTACAGAAAGTGGACAATGTCAAGATTTTCTCCAAAGATGAGCTA  
 AAGAAAAATCACAAAGAATAATTCAGAAGTTCTTGGTCAAGGAGGCTTTGGTAAGGTGTAC  
 AAAGGGACTCTTGAAGACAATACTACGGTTGCTGTGAAGACGTCAATTGAGGTAAATGAA  
 GCTCGAAAGGATGATTTTCAAAATGAAGTGTATCCAAATCGCAAATGATGCATAATAAC  
 ATTATCAAGCTTTTGGGTTGTTGCTTGAAGTGGATGTTCCAATGTTGGTGTATGAGTTT  
 GCCGCTAAGGGAAATCTTCAAGACATTCTCCATGGTGTATGCCAACATCCCTCTCCCGTTG  
 GGCTTACGCTTAAACATCGCAATTGAATCAGCTGAAGGTCTAAGGTACATGCACTCATCA  
 ACAAGTCGTACCATACGACATGGTGTGCAAGCCAGCCAACATACTTTTTAACAGATAAG  
 TTTATCCCCAAGATCTCATATTTTGGGACATCTAAGCTTCTTACTGTAGACAAAGATTTT  
 ACCATGTTTGTGTAGGAAGCATGGGCTACATAGATCCAGTATTCCATAAGACCGGCCAT  
 TTAACACAAAAGAGTGTATATACAGTTTTGGAGTTGTACTGCTAGAGCTCATATGTAGG  
 AAGCCAACAATATATGGTGAATTTGTAGCCTCATCATTGAGTTCCAAAATGCCTATGAT  
 CAAGAGAACAGTGGGAGGATAATGTTTGACAAGGAGATTGCAAAAACAAGAAGATATCCTA  
 ATCCTAGAAGAAATAGGCAGATTAGCAATGGAGTGTGTTGAAAGAAAAGGTTGAAGAGCGA  
 CCTGATATGAAGGAGGTAGCAGAACGACTTGTTATGCTGAGAAGATCTAGGAAGTGTGGA

TAG

>OsWAK105, 3970.t00013, Chromosome 10, post-processing  
 ATGGCCACATGCTGGCTACTTGCCAGCCTGCTGCTTTTGGCTTCCGCCGCCGGCGACGAG  
 AGCGTCGTCACCGGCCGGCCTGCCGGCTGCCAGGCTAGGTGCGGCGACGTCGACATTCCC  
 TACCCGTTTCGGCATCGGCCCAACTGCTCCCGTGGGGAGGGCTTCGAGATCGCCTGCAAC  
 ACCCGAAACGGCAACGGCGACCTGGTGCCGACCTCGCCGCCGCCAACGGCAGCATCCAT  
 GTGCAGAGCCTGTCGGTGAACAGCTCCCGGAGGTGAAGGTGATGCTTCCCGTGGCGTAC  
 AAGTGCTACGACGCCGGCGACAACGTCAACAGGAGGTTCTACGGCGATGTAGACCTCAAC  
 AACAACGGCGTGTACCGCATCTCCGACAGCCGCAACATGTTCTGTTGTATCGGGTGCAAC  
 ACCCTGTCTACACACAGAATGGGAACAGCGGTGGCAGCAACACCCACTACAGCGGACTC  
 TTCTACACCGGCTGCGTCACCTACTGCAACGACTCCCGGAGCGCGCAGGATGGCCGGTGC  
 GCCGGCGTGGCTGCTGCCATGTCGACATCTCGCCGGGCCTCACCGACAACGTCGTCTCC  
 TTCGGGCCCTGGACGCGTGGCTTCCAGGTAGACTTCAGCCCCTGCGACTACTCCTTCCTC  
 GTCGACAAGAACGAGTACGAGTTCGCTAGCGCCGATCTCAAGATGGACCTCAACCGAACC  
 ATGCCGGTGTGGCTGGACTGGGCCATCCGTGACTCCGTTACCTGCCCTCCACTGGAGGTG  
 CAGGAGAAGAAACCGGCTGGGTACGCGTGTGTGAGCGACAACAGCGAGTGCCTCAACTCC  
 ACCAACGGTCCCGGATACTACTGCAAGTGCAAGCAAGGCTACGAGGGTAACCCCTACGAC  
 AAGGACCAAGGTTGCAAGGACATCAACGAGTGTGATGTGTCCAACAAGAAGAAATATCCC  
 TGCTACGGTGTCTGCAACAACATCCCAGGGGATTATGAATGCCACTGCCGTGTGGGTTAC  
 CAGTGGAGTGGTGAAGGCCCAAGAAACAAGAGTGCAGCTCAAAATTCCTCTTGCAGCA  
 AGGCTTGCCCTAGGCATCACTTTGGGATTTTCTTCCTAATTGTTGCTGTTCTTTTACG  
 CTAATGATGCACAAAAGCGAAAAATGAATGAATATTTCAAAAAGAATGGTGGTTCAGTG  
 CTACAGAAAGTGGACAATGTCAAGATTTTCTCCAAAGATGAGCTAAAGAAAAATCACAAG  
 AATAATTCAGAAGTTCCTTGGTCAAGGAGGCTTTGGTAAGGTGTACAAAGGGACTCTTGAA  
 GACAATACTACGGTTGCTGTGAAGACGTCAATTGAGGTAATGAAGCTCGAAAGGATGAT  
 TTCACAAATGAAGTGATCATCCAATCGCAAATGATGCATAATAACATTATCAAGCTTTTG  
 GGTTGTTGCTTGAAGTGGATGTTCCAATGTTGGTGTATGAGTTTGCCGCTAAGGGAAAT  
 CTTCAAGACATTCTCCATGGTGTATGCCAATCCCTCTCCCGTTGGGCTTACGCCTAAAC  
 ATCGCAATTGAATCAGCTGAAGGTCTAAGGTACATGCACTCATCAACAAGTCGTACCATA  
 CGACATGGTGTATGTCAAGCCAGCCAACATACTTTTAACAGATAAGTTTATCCCCAAGATC  
 TCATATTTTGGGACATCTAAGCTTCTTACTGTAGACAAAGATTTTACCATGTTTGTGTA  
 GGAAGCATGGGCTACATAGATCCAGTATTCCATAAGACCGGCCATTTAACACAAAAGAGT  
 GATGTATACAGTTTGGAGTTGTACTGCTAGAGCTCATATGTAGGAAGCCAACAATATAT  
 GGTGAAAATTGTAGCCTCATCATTGAGTTCCAAAATGCCTATGATCAAGAGAACAGTGGG  
 AGGATAATGTTTGACAAGGAGATTGCAAAACAAGAAGATATCCTAATCCTAGAAGAAATA  
 GGCAGATTAGCAATGGAGTGTGTTGAAAGAAAAGGTTGAAGAGCGACCTGATATGAAGGAG  
 GTAGCAGAACGACTTGTTATGCTGAGAAGATCTAGGAAGTGTGGATAG

>OsWAK106, gi|19881772, Chromosome 10  
 ATGAAGAGGAAGAGGAGGAGAAGGAGAAGCGGGAAGGAAATGTACCGCCTTCCTCACCACCGACGGCCA  
 TACTGGCTGCTGTCTTTGTTGACAGCGACCAACCGTCGACCTCGTCCACCCCTCCCTCGGAGTCCGCAA  
 ACTGCACGCTGTTGTGCGCGACCGGGTGAGCCTTGTACCACAGCAGATCTTGGCCTCGCTCGCGCGCCCC  
 CGCGCGCGCGCGCTCCCTCCCAACGAGGGGACTGACCTCACCGCCACCATCGCGCGCGAGGGCTTCG  
 ACAGCTACGTCTCTCGCGCTCTCCGCGCTCCACCGCGAGTGCCGCGGTGGCGCTCCCGCCCCGGGAA  
 GAAGGCGGTGGCTGCGACAGCGGGGGACCGAGCCCGGCATCCTGAAGCGCCTCCCCCGATGGATCTGGC  
 CTCCCTGGCCTCGACCCCTCGCAGGCGGCGATATAGATGAGTGCCTCTTCCGGGTATTATGAGCAATT  
 GCTCCTTTAATAGCGTATGCGTAAACAGACCAGGAGGCTTTGATTGTCCATGCAAACGAGGAATGACGGG  
 CGACGGCAAAAGAGGAACATGCACCGAGAATTTCCACCAGCAGCAAAAGCCGCTGTCCGCCTTTCTTCC  
 TTCATTGTTTTATCGTCCTAATTTTTATGGTGAACAACACCTAAAACCTTAAGAAGTTCTACGAACAAA  
 ATGGTGGTCCGGTATTGAAAGGTGTGAGAAATATAAAGATCTACACAAAGAAAGAACTGAAACAAATAAC  
 GAGTAACATAGCAGCGACATTGGAGAAGGAGCCTCTGGTAAAGTTTATATGGGGACTCTTAAGGGCGGA  
 CAACAAGTGGCTATAAAGAAGTCAAAAAAGTTGATGAAGAAAGAAAAAGTGAATTCCTCAAGAGGTCA  
 TACTCCAATCTGAAATGAAGCACAAGAATATAATCCAGCTCTTTGGTTGTTGCCTTGAAGTTGATGTTCC  
 TATGTTAGTGTATGAGTTTACCGTGAAGGAAGTTTACATGATGTCCTCTTCAAATGTGATGAGAATATG  
 AAAGGCAATTTACCTGACGTTTACCCAATACATGATAACAAGAAAGGAAAGGAAAGGAAAGGGA  
 AAGTACACGACGCACTCGTTGAATGTGATGGTAACAAAAATGTGAGTTTGCATGATGTCCTCTTCAAATG  
 CGGGGATAAAATTGCAATAGATACACTTCTGGAGATCGCTATTGGATCAGCTGAAGGACTAACTTATATG  
 CATACAGCACGGGAGACTCCCATCCGTCATGGTGTATCTCAAATCTGGTAATATACTTATAGACAATAATT  
 TCGTCCCTAAAATTTAGACTTTGGAACATCAAGATCACTGGTTGCAGGTCAATAATTTAGGCCTGATAA  
 ATTCATTCCTCGGACATGAATTTATATAGATCCAGTATATATGGAAGATGGAATGCTCACGGAGAAAAGT  
 GACATCTATAGCTTTGGAATTTCTTATTGAACCTTTTACAAGGAAGCCCGCAAAATATGATGACGACA  
 GGAGCTATGTTCGAAACTTCATTACGGCCTACCTTGATAAAAGAGAAAGGGAAGAAATGCCATAAAGAGAT

OsWAKs-Supplemental Data 1[1].txt

TACACCAGATGTGGAAATTAATATTCTTGAAATGGTTAGTGAAGTTGCTGTGGCATGTTTAGAACCTGTC  
CAGGATAAACGCCCTGATATGATAGAAGTAGAACGGCAGCTCCATCGAATTAGACACATTGCAGGCCAAA  
GGATAGAGGAAAAAAGAGGAATTTCAACGTGCATTCCCTAGAACGGGATCGGTTATCTCAAACGGGTT  
TAAAGCCTCGTCTCTTTCAGGTAGGGTCCCTGTCTACTAAGCAAAGGTCACTAATGTGA

>OsWAK107, gi|22711562, Chromosome 10

ATGATCAGGGTGCTGATCCTCCTCACCTAGGCTTCTCTAGAAGCAATTGCTGAGAAACCAGCAGCACAGC  
AGCCGACGGAACCTCAAGGCTGCCCCGCCCCGATATGTGCGGCAACATCACCATAACCCATCCCTTCGG  
CATCAAACCTGGCTGCTACCTCGCCGGCTTCGAGGTCATCTGCGACCGCACGTTCAACCCGCGCGAGCC  
TTCCTCGCAGGCGACCCGCCATTGTTGCGCGACAAGTTGCCGCCGAACGTTAATAGCAGTAAACCATTCA  
CGGTGACGGCCAATTTCTACTACTCTGGCACAGATGCAGGCATGCCAGCGAAATGGTCAACTACACCCG  
AGGGCCTCTCGAGCTCCTCGACATCTCGGTTAATCAGAGCAAGCTACGTGTTTATGCAGCCATCAACTCC  
GACTGCAGCAGCAATGAAACACACCATATCCTATTTGAGCAGTCAATCAAGCTTCAGCCGTCAGGTCCAT  
TCACCTGTGCGCAAATGATAATTCCTAGTTGGCGTCGGCCAAAACGTCATCGCGATGTTGCGGGATTTC  
ATACGCCGAGAAAGAATACTCGACGATTTGCCTGTCTTCTCAGTTTCAGTGTCCAAGGCGAGGAATGGA  
CCGTGCGAGAATGCCACGGGGCTTGCTGCTGCCAGCAGACACTGCCTCCTGGCGTCAACACGACTCTTG  
TGAGATTCCAGCACAGGAACAACAGCAAGTGAGAACCTATCCATGCTCATATGCCATGCTGGTGGAGAA  
GTCATGGTACAATTTCTCTACAGAAGATCTGTTTGAGTACCCTGCTTTTCCCAACAAGTACCCAGGGGT  
GTACTACCGGACAAGTATCCTACGGGTGTACCCCTTGCTTGACTTTGCTATCAGGAATGGGTCTGCC  
CACAGGAAAACTGTTGCCACCTGGAAAAGACTATGCTTGTGTGAGCGGCAACAGCTCTTGCTCGATGC  
AGGAAAGGGCCGAGGATATAAATGCGAGTGCAAGAGGGCTACAATGGTAATCCTTATATGCCTAATGGA  
TGCCAAGGCACTCCTACTGAACCCCTACAGGTGACGGCTCATAG

>OsWAK108, gi|19881780, Chromosome 10

ATGTTGATGATCCTGCCCTGTAGATTGCTGCTGCGTCTAGTCTCGCAACCCTTCTGATTTTGGCTGCTA  
GTACAGATCAACATGTAGCCACGCTGCCGCCGATAACACTTCCAGGCTGCATCGACAAGTGCGGCAACAT  
CAGCATACCTTCCCGTTGCGCACGAAGCAGAGCAGTTGCTTCTTCCAGGCTTCGAGGTACCTGCAAC  
GACACATTGAGTCCACCTCGCCTCTTCTCGGAAATTTCTAATCCTGGAGACAGGCAAACTATCAGGAAT  
TTGAAGAGCGCTACTACTTGACGACGGAGGAAGGCATGCCGACACATCTCATGACTGATGATTTTTTGT  
CATGGAGCTGATGAGCATAAACCTCACAGAGGGCGTAGCACGGGCATATGGCCCTGTGAGCTCGGATTGC  
AGCCTCAACGACACATATCATTTGGTGAAGAGGCAGATGACGGGCTTGCCGGGGCCATTCTCATCTCCA  
CGCGCAATGCTCTCACAGCCGTGCGCTGGAACATGGAAGCAAACTCGCGAGATCGGTGCGTGGATCCGG  
CTTCTCAAGACCTGTGGTGTGCGGCTCGGGCAACCTGAATTTGCAACGAATGGGTGATGCCTGGGAGGA  
GGCTGCTGCCAGGGTGAAATCACTCAAGGCATTGGCTCTATCGCGAAGGACTGGTACAACCTTCACTTCGC  
CGGACCTCTATTCCGACAACCTTCTCCAAGAAATATCCAAAGGGTGTCGGCTAGTGATTGACTTCGCCAT  
CAGGGATGGTTTTTGGCCAGCGGCAGGCCAGGCGCCGCGGCGAAGTATGCTTGTGTGTCAGCAGCAACAGC  
TCATGCGTCAACGTGACCAACGGTGATGGTTACATCTGCAACTGTAGTAAGGGATATGATGGGAATCCTT  
ACATACTAACGGATGTGATGATATTGATGAATGTGCCCTCCGAGATAGCCATCCTGAGCTCCGAGTCTT  
GTATCCTTGTTCAGAAATGGAATCTGCATGAACAGACCAGGCGGATATGATTGTCCATGCAAACGTGGA  
ATGAGCGGTGATGGCAAAGCAGGAACCTTGCTCAGAGAAATTTCTTTACAGGCTAAGATTGTTGTAGGTG  
CAATAGGTGGTCTCTTTATTGTGCGAGTCTTGTGTTCTTGCATTTGTTACAGAGAGAAAAAGGAAGAT  
GAGAGAATTTTTTGAAGAAGTGGTGGTCTATATTAGAAAAAGTCAACAACATAAAGATATTCAAGAAA  
GAAGAACTCAAACCAATTTCTGAAAGCTAGCAATATTATTGAAAAGGTGGATTTCGAGAGGTTTACAAAG  
GCCGTCTTGCTGATAACAACTGGTGGCCGTAAAGAAGTCCATCAAAGTCAATGCTGCACAAAAGGATCA  
ATTTGCAAACGAGATCATCATCAATCCCGAGTCATCCATAAGAACATTGTCAAGCTGATAGGTTGTTGC  
GTAGAAGTTGATATCCCAATTTTAGTATATGAATTTATCACTAATGGCAGTCTCGATGACATTCTTCACG  
GTAGTAACGGAGAACCTCTCAGTTTGGATTTACGTTTGGATATTGCTGCCGAATCAGCCGAAGGTCTGGC  
ATATATGCATTGCAAAACCACCAATACAATCCTGCATGGTAATGTTAAACCAGCTAACATACTTTTGGAT  
GACAACCTTTGTTCCAAAGATATCTGATTTTGGGATTTGAGGCTAATTGCCGTAGATAAAAAATCAACACA  
CAGATAAAGTCATTGGTGACATGAGTTATATGGATCCAGTTTACCTACAAACAGGACTATTAACGAAGAA  
AAGTGATGTCTACAGTTATGGGGTTGTTCTCTTGGAGCTCATCAGCAGGAAGAAGGCCACATATTCTGAC  
AACAATAGCTTAGTTTCGAATTTTCTAGATGCTCACAAGAGAAAAAGGAAAGCAACTGAGCTGTTTGATA  
AGGATATCACGCTGGCAGAAGACTTGGACGTTCTTGATGGTCTCGTGAGGATTGCTGTGGAATGTTTAAA  
CCTTGACGTGGATCAACGACCAGAAATGACAAAAGTAACAGACGATCTTTTCATCTTGATGAAATCTCGA  
GCTAAAGAGACCAAGCAGTAA

>OsWAK109, 3650.t00008, Chromosome 10, pre-processing

ATGAGATCGAAGTTTCTTCCAACGCTGCTCCCCGCGATAACCGTTCTCTTGGTCATGCAG  
GCCATATCACGGATGACGACCGTGGCAGTGGACCAACGGTCGCCACGACGTCGGATCGCA  
CTCCCCGATGCCCCGACAAGTGCGGCGACATCAGCATCCCTTACCGTTTCGGCACCAAA  
GAAGGCTGCTACTTGGACATCAACTTCATCGTCCTCTGCAACCTGTCCACCACGCCCCC

OsWAKs-Supplemental Data 1[1].txt

GCCACCGCCGCTGGAACCATCATTCTGAAGGGTAACGGCTACTACTTCGGGGACCAGGAA  
AATCCGGTGGGCGTCCAGACCAACAAATCCTGGTGGACCGTGGATCTCATCGACATCGAC  
GTGACGCGGGGCGAGGTGCGGGTGGCCGTGCCGGTCAGCTCCGACTGCAGCACTAACGAG  
AGCTACCACGAGCTCAGCATCTTCACCCAAAGCCTCAACTTCTCGACGACGTTCTCTTC  
TCCGCGACGAGGAACGTGCTGTTGGGCGTCGGCCAGAGCGTGAGAGCCCGGATCGACGGC  
GTGATGAGCGGCACAACTACTCCGCCGCTGCAACTCGCTGTTTCGACACGCCGGCGAAG  
GCGGAGAACGGGACGTGCATGGGGCTCGGCTGCTGCGAGGCGGAGCTCGCGCCGGAGCTT  
GGCATGATCACGGTCTCTATGTACAAGCAGAGCAACAGCATGTGGGAGACGTTCCCGTGC  
ACCTACGCCATGGTGGTCGAGAGGTCTGGTACAACCTTCTCCCTGCAGGACCTTTACGGA  
TACGATGTTCTCGACAAGAAATTTCCCGGCGGAGTGCCGCTTGTGCTCGACTTCGCCATC  
AGGAATGAATCTTGTCCAGCAGAAGGCAAACCGTTGCCACGGCTTGCCGTAGTAGCAAC  
AGCCTCTGCGTCAACACGACCAACGGCCAGGGATATGTCTGCAAGTGCCAGGAAGGTTAC  
GAGGGCAACCCGTATCTACCAGATGGATGCCAAGGTATTGCCTTTTCTTTTCCAGGAAA  
AAATTGGTGCTTTCCATTCTTGCAATTTGGTCCGCCGGGAAGATTAAAATGTTTGATT  
AGAACAATTATATGAACAATAGGTAATTTGATACTGAGGGAGTAA

>OsWAK109, 3650. t00008, Chromosome 10, post-processing  
ATGAGATCGAAGTTTCTTCCAACGCTGCTCCCCGCGATAACCGTTCTCTTGGTCATGCAG  
GCCATATCACGGATGACGACCGTGGCAGTGGACCAACGGTCGCCACGACGTCGGATCGCA  
CTCCCCGGATGCCCGACAAGTGCGGCGACATCAGCATCCCTTACCGTTTCGGCACCAAA  
GAAGGCTGCTACTTGGACATCAACTTCATCGTCTCTGCAACCTGTCCACCACGCCCGCC  
GCCACCGCCGCTGGAACCATCATTCTGAAGGGTAACGGCTACTACTTCGGGGACCAGGAA  
AATCCGGTGGGCGTCCAGACCAACAAATCCTGGTGGACCGTGGATCTCATCGACATCGAC  
GTGACGCGGGGCGAGGTGCGGGTGGCCGTGCCGGTCAGCTCCGACTGCAGCACTAACGAG  
AGCTACCACGAGCTCAGCATCTTCACCCAAAGCCTCAACTTCTCGACGACGTTCTCTTC  
TCCGCGACGAGGAACGTGCTGTTGGGCGTCGGCCAGAGCGTGAGAGCCCGGATCGACGGC  
GTGATGAGCGGCACAACTACTCCGCCGCTGCAACTCGCTGTTTCGACACGCCGGCGAAG  
GCGGAGAACGGGACGTGCATGGGGCTCGGCTGCTGCGAGGCGGAGCTCGCGCCGGAGCTT  
GGCATGATCACGGTCTCTATGTACAAGCAGAGCAACAGCATGTGGGAGACGTTCCCGTGC  
ACCTACGCCATGGTGGTCGAGAGGTCTGGTACAACCTTCTCCCTGCAGGACCTTTACGGA  
TACGATGTTCTCGACAAGAAATTTCCCGGCGGAGTGCCGCTTGTGCTCGACTTCGCCATC  
AGGAATGAATCTTGTCCAGCAGAAGGCAAACCGTTGCCACGGCTTGCCGTAGTAGCAAC  
AGCCTCTGCGTCAACACGACCAACGGCCAGGGATATGTCTGCAAGTGCCAGGAAGGTTAC  
GAGGGCAACCCGTATCTACCAGATGGATGCCAAGGTAAATTTGATACTGAGGGAGTAA

>OsWAK110, 3650. t00009, Chromosome 10, pre-processing  
ATGGAGGGCAACGGCACATTTCCCTTCTCTCAGTTTTCGTCGGATCCGGGCTCCTCC  
GCTGCCGGTCAACCTCTCTCCGTCCGGTATCCAGCTTCCCGGAGCCGGCGCGCG  
GCTGGAACCTGAACCTTCTCTCTCTCTAGTCTCTGAGCTTTGTGCAGAACTTGCTTG  
TTTTTGTTTCTTGCATGCATACTTTCTGCATATGCAAACTACGTAGAGAGCTCCAGTG  
TTGCAGAAATCACCTGAAGGGTGATGAGCTCTCTATGTATCAGCTAGCAGACTTTGGCCA  
GTTTGCAAGGTAATCATCACTGTTTCTTACTTGTTGCTCCATGATCTTCTTGAGCATAT  
ACGTATCATGGCCAGTTCGCAAGGAAAATCATACCGTGCCTTCTTGTTCACGATCTCT  
CCATGTTAATCTCTTATAGTATCTATTGGATGTTCTTTGCTTTTGTAGGGTTCTATGG  
ATGCTCTTCTATGTATGCTAGCAATGCTTTTCAATTCAGGAAAACAGCAGAGCAGGCTG  
CGCGGGAACGATGGAGGGAGAGGCAGGTAGTTAGTGTGGGAAAGAGAGAAACATTGAGGG  
AGTTGGTGATTAATCAGGGGATGTGGTTATTAATCAACATTAGCCCATGGATCCAAAC  
ATATGAACCTAGGCTAATGTTTAGCCTACCAATTCAAGGCTAAACATTAACCTTAAAT  
TAGCTCTGGGCTAATCTTCCAAACAGGGCCCTGTTATACATGCCCTAAGGTTAAGTTCGT  
TTGAACATGTTCCCATCTCTCTCTATTTTACGTGCACACTTCCCAAACCTGTTAAACG  
GTGTGTTTTTCAAAAGTAAATATAGAAAAGTTGTTTTAAAAAATAATGTTAACCATT  
TTTAAATATTTTAGCTAATATTTAATTAATCGTGTGCTAATCTATTGCTCTATTTTTCAT  
GTCAAGAGGTGAGGGTTCCCAACCCCTACCTAAGAAACATAGCCTAAGTCGGGATACATA  
GGTCCCAAATTTCTAAAAGTCTAAACCTAAATAGAACAAAGAAAGAAAGGATATATAGGTT  
CCAAACTCCAAAAGACTACACCTAATTAAGAGAAACAAGGAAAGAAAGTACTAATCCATAC  
CTAGCTTAGCTTATTTTCTAGAGCGCCCTATGTTTTTAACTTTTTAATGCCATTAACTA  
ACTAATCTCTTGTAACTATTTTATAGACATTGATGAGTGTGAGCTTCGAGATGAACAAC  
CTGCGCTACGAGATCAGTACCGGTGCTATGGGATTTGCAAGAATACGATAGGGGGATATG  
ACTGTCAATGCAATTTGGAACGAAAGGTGATGCCAAAACCTGGAACATGCACACAGCTGT  
TTCCCTCTCCCTGCAATGGTGGCTACACTTGGTAAGCAATTCGGCATTTATTGGTTCTTA  
ATTTCAAATGAATGATGTTATTTTTCAGTGAGATAATATTCTGGTTTCAACTGCTAGTAT  
TTACCATATGCCATAAGATAACAATGCTTATTAGTAAGTGCTAATTAAGAATAGTCCAT  
GATATCCTTTTTTTATGAATATACATAAACCTATTAGTCAAGGAATTTCTTAATAATTA

OsWAKs-Supplemental Data 1[1].txt

ATTTATATTCCTTAATTATGAATACAACAATTTGACGTTATTCTAGAAGAACTTTTCATTA  
GCTTTAGAAATTACTCCATTTCTCATGTTTGCCTGCTTATTCCATTAGAATTTTCATGG  
CATATAGCAAATTACTTTATTTTGTATATATTGTGATTTCGGTACAGATCCTTTTGCTTC  
AAGTAGATGATGTGATCTTTTGTCTTTTATAAACTTATAACCTATGAATCATTTCGTCT  
TAGTTATATATTTTAGTGGATACTGCACTAGTTTCCCATATATTATTTGTCCTAATTAAT  
AAGTTCACCTTGAATCTTTTCATATATTCATCTCCAGCGTGATGTTTTTCAAAATCAACTT  
TTGCCAGTATATATAATTTGTTTTACGCTGTGACTGAAATACAAGCAACTAATAACATGT  
ACTACACTTTTGTCAATTGTCCCTGCAGGCATAATCGGTCTCACATCCATAGTGGTTGTT  
GTAGTATTGTTTTAAGCTTTTGTGTTGACGAGAGGAGAAAAACAAAAGAGTTTTTTCATAAAG  
AATGGTGGCCCGGTACTAGAAAAGGTAGACAACATTAAGATTTTCAAAAAAGAAGAAGCTT  
AAGCCAATAATACAATCATGTAATGTTATTGGGAAAGGTGGATTTGGGGAGGTTTACAAA  
GGACTCATTGACGATAAACTCGTTGCAATTAAGAAATCCATTAATGTAGACAAGTTACAA  
GAGAAGCAATTCACAAATGAAATTATTATCCAGTCAAAAGTCATCCATAAGAACATCATA  
AAGCTCATAGGTTGCTGTCTAGAGGTTGACGTTCCAATGCTGGTCTATGAGTTTGTTC  
CGGGGAAGCCTCCACGACATACTACATGGCAATAGGAAAGAGTCCCTCCCTTACAGAAA  
CGTTTGAATATTGCAGCAGGAGCAGCAGAAGGATTAGCTTATATGCATTCAAAAACCTCT  
ACAACATTTTTGCATGGTGATATCAAACCTGGCAATATACTTTTGGACGAAAACCTTTGAT  
CCCAAAATATCTGACTTTGGAATATCAAGATTGATTGCTATAGATAAAACCCATACTAAA  
TGTGTGATTGGAGATATGTGTTATATGGATCCAATATATCTTCAATCGGGCTTGTGACG  
AAGCAGAGCGATGTATACAGTTTTGGAGTGGTGCTCTTAGAACTTCTTACGAGACAAAAG  
GCAAGTTCTGGTGAAGATACTAGACTGGTTACGACGTTTCTAGATGCATATACAGAAGAT  
CATAAGGGCGCTATCGATCTTTTGGACAGAGAAATTTTATTGGAGGGCGACACAGAAGTA  
TTCAACAATCTTGCCATCTAGTAGTGGATTGTCTGAAGTTCGAAGTGGAAAGAAGGCCA  
GAAATGACAGATGTAGAAGAACGACTTCAAACCATGAAGAGATCTTATGTGCCAAAAAGC  
ATATCTGATGCTAGTAGCAGTATAGATACATAA

>OsWAK110, 3650.t00009, Chromosome 10, post-processing  
ATGGAGGGCAACGGCACATTCCCCTTCTTCTCTCAGTTTTCGTCGGATCCGGGCTCCTCC  
GCTGCCGGCTTCAACCTCTCCTCCGCTGCCGGGTTCTATGGATGCTCTTCATGTAGTATG  
CTAGCAATGCTTTTCATTACAGGAAAACAGCAGAGCAGGCTGCGCGGGAACGATGGAGGGA  
GAGGCAGACATTGATGAGTGTGAGCTTCGAGATGAACAACCTGCGCTACGAGATCAGTAC  
CGGTGCTATGGGATTTGCAAGAATACGATAGGGGGATATGACTGTCAATGCAAATTTGGA  
ACGAAAGGTGATGCCAAAACCTGGAACATGCACACAGCTGTTTCCCCTCCCTGCAATGGTG  
GCTACACTTGGCATAATCGGTCTCACATCCATAGTGGTTGTTGTAGTATTGTTAAGCTT  
TTGTTTGGACGAGAGGAGAAAAACAAAAGAGTTTTTTCATAAAGAATGGTGGCCCGGTACTA  
GAAAAGGTAGACAACATTAAGATTTTCAAAAAAGAAGAAGCTTAAGCCAATAATACAATCA  
TGTAATGTTATTGGGAAAGGTGGATTTGGGGAGGTTTACAAAGGACTCATTGACGATAAA  
CTCGTTGCAATTAAGAAATCCATTAATGTAGACAAGTTACAAGAGAAGCAATTCACAAAT  
GAAATTATTATCCAGTCAAAAGTCATCCATAAGAACATCATAAAGCTCATAGGTTGCTGT  
CTAGAGGTTGACGTTCCAATGCTGGTCTATGAGTTTGTTCACGGGGAAGCCTCCACGAC  
ATACTACATGGCAATAGGAAAGAGTCCCTCCCTTACAGAAACGTTTGAATATTGCAGCA  
GGAGCAGCAGAAGGATTAGCTTATATGCATTCAAAAACCTCTACAACATTTTGCATGGT  
GATATCAAACCTGGCAATATACTTTTGGACGAAAACCTTTGATCCCAAAATATCTGACTTT  
GGAATATCAAGATTGATTGCTATAGATAAAACCCATACTAAATGTGTGATTGGAGATATG  
TGTTATATGGATCCAATATATCTTCAATCGGGCTTGTGACGAAGCAGAGCGATGTATAC  
AGTTTTGGAGTGGTGCTCTTAGAACTTCTTACGAGACAAAAGGCAAGTTCTGGTGAAGAT  
ACTAGACTGGTTACGACGTTTCTAGATGCATATACAGAAGATCATAAGGGCGCTATCGAT  
CTTTTTGACAGAGAAATTTTATTGGAGGGCGACACAGAAGTATTCAACAATCTTGCCATC  
CTAGTAGTGGATTGTCTGAAGTTCGAAGTGGAAAGAAGGCCAGAAATGACAGATGTAGAA  
GAACGACTTCAAACCATGAAGAGATCTTATGTGCCAAAAAGCATATCTGATGCTAGTAGC  
AGTATAGATACATAA

>OsWAK111 9638.t00862, Chromosome 10, pre-processing  
ATGTTACCTTTGCTTTTCATTCTGTTATTGGGGATAGCTCAAGTCAAGAGAAGCTTTGCA  
CTCAGTCCAGTCTCTCTATGGCCATCTCATACCCCATATCCAGAGGGTATGACCAGA  
CGGTTGGAGAAAAGGTTCTACTGGATCATGGTACCAATCCAAGTCCTTCTAATGCATCC  
CTACCCTCCACTTCTACACTCGCTCGCTGTCCAAAGAGATGCGGCAAATTGAGCTTCGAT  
TATCCCTTTGGCATAGGACAAGGTTGTTTCCGCCATGTCGATTTTCAGTCTCACATGCGAC  
ATGGCCACTCAGCCTCTAAACTCTTCTGAACAATGGATCGACAGAGGTTCTTGGTGAT  
ATTGGGGTAGATGGTCTGAATATCTATTTTATCCACTTCAACTTAATTCCGATCACCTCC  
ACCCATGTCACTCCCTATAAATCCGGTGGTGATGTCTACAACCTTTTCATGGAAAAATCCA  
GGGATTTCTTTTACCTTTGACGACAGGGCATGACATTTGTTGTCACCAGCTGTGACTTG  
GATGTATACATGGTAGATCAAGAAAAAAGCACACCTATTTTGTGTTGGCACTATCGCTTGT

OsWAKs-Supplemental Data 1[1].txt

CCCAGCAAAGAGATTGCTGAGATGGTATACAGACAGGATTCTGAAGGCCCTGGTTGGTAC  
 ACTATAGATTCACTACCAGCTCGGACAGTTCAAGTTACAGTTTGTTCGTCACAAGACCGGT  
 AATACCCAAAAGTACTTTAATCTAACCATGTTGTGGGATAGAATCAACATTACTGTGAAG  
 GCCAACCTTGCTTGGAATATTGTGGACCAACAAGATGCTTGAATAACATGGAGGATGAC  
 AGGAAGAACCATGCTTGTATCAGCAATCACAGTTCATGTGTCTCCTCGCAGTATATTGAT  
 GTTGGCTATGCATGCCGGTGCAATGATGGCTACGTTGGAAATCCCTATATTATGGATGGC  
 TGCAAACCTCGATGACGGTAATTTCTTCATCATAGCTTTTTTTTTTTAATGTTGTATCAT  
 ATAGTACCTGCAAAAGTCCAAAATCAGTGCCTTTATACTCAAACTAAGTTACGCAAAAA  
 TAGTTTTAGTATATCATTTTTATACAACCCTACGGATATAAACACTTCTTCTACATGCTAA  
 CTCACTTGACTTCTTGATAACTCAATGCTATAAACCTATATATTTAGCACTAAATAAAAA  
 TTATCAAGAAAAAATAACAAATTTAGATTTAGCACAAAATTGTTTCATGCACAAAGCAA  
 CAGGTTTTATTCTATAATATCACAAAGCTAAGAGGGTCAACTACTAAGAGAGGTATCTGCC  
 CCATGATTAATTAAGGCTCTATTTGGTAGTACAACCTAAACTCCAAGAGAGAATTGGATA  
 TCATTAGCTTCAAGAAATCTAGCTTGGAGCTTGAGTTATGGCTGGATTAGAGTTTTTAGG  
 TTGAGATGACTTGTTCACATTTGAGACTAGTTTTAGAAGATCAAACTGCTTTACTTTAGG  
 TTACAAACAAGATTTCTCCAACAACGTCTTGTTGTTGGAGGCATAGCAAATAAAACATG  
 CCACTATGGTTGAAGTTGGAGAAAAAACTATGAATATTTTGATATATAAATATATATAT  
 ATATATAAATATATATATATATAAATATATATATATATATATATATGCTTGGTACAATCT  
 CAAGAATTATGGTATTAGTACAGTTAACAGAACCACATCTAGTTTATAGCTACTCTCTCC  
 ATTTTATATTATAAGCCGTTTGACTTTTTCTTAGTCAAAATTTAGGTTTGACCACGT  
 TTATAGAAAAAATTAGCAACATCTACTACATAAATTAGTTTCATTAAATTGAACATTGA  
 ATATATTTTGATAATATGTTTGTGTTGTATAAAAAATATTAGTATATCTTTGTATAAACT  
 TGGTCAAATTTTAAGAAGTTTGACTAAGAAAAAAGTCTAATGACTGAGTAGTTGTTTCTT  
 TTATGTGGGATATGTTTCTGCAAATTTTTCTTTCAAATTTTATACTACATAGCAGATTT  
 TTATGGGGTAGAGGTATTACCCACTTGCATCCCTACTAGTGGGCTATTTTAAGTGAATG  
 ATCGTAGCAGTTGGCTGATGGATTCCATATGTAAGGCCGGTTTATATGGCAAAATTTTT  
 TTGTTTTGGGGTGTACATTGGATATACGGACACATATTTGAAGTATTAACGTTTTCTA  
 ATAACAAAACAAATTATATATTTCCGCCACAAAACCTGCGAGACGAATTTATTAAGTCTAAT  
 TAATCCGTCATTAACAAATATTTACTGTAGCACCACATTGTCAAACATGGCGCAATTAGG  
 CTTAAAAATCCGCTCTCACAGTTTACATGCAAACCTGTGTAATTGTTTTTTATATTTAATA  
 CTCCATACATGCGTCCAAACATTTGATGTGATGGGTGAAAAGTTTTTTGTTTTAGGAAGT  
 AAACAGGCCCAAAGAATTGCTAAACTTGTAAAAAGTGTAGTCAAATGATACTCTAGTGCC  
 ACAGTTGTTACATAAAATTTGTTAAATGTGGATTCCATATTTATAAGAATAGCTAAATTGG  
 GTTTCATTAAACTTACTATTTTTCCACTATCTCCCGGATCGAAGTCTTACCATTTGATGC  
 ATTTTTCTTCAATTTAGCTTAGCCGGTGTGTTTACTTGCAAAAAATATATTTTGTGGGCA  
 GTGATACTAGTGTCCGCACTACAGGAGAACCTCATCTTTTATCCAATGCCGCAAACTACAA  
 TTACACCGGATGTAGTAAGAAGTGTACTAAAATCACTTTATTACCAGTTCTAAAAGCCC  
 AAGTCTCAAAAATATCTTTTGTCTAAAGATACATTTTTAGTACCGGCTGGTATTAC  
 GAACCGGGGATAAGATATTTTTTTTAAACATGCCTCTAGGGTTAGTTTAAAAAGAATG  
 TATCTCTATCCAAGTCAAATTTGTATAGTAGGTGGAATGGTAATACTTATGAGGGTTGAG  
 GTTAGAGATTTTGTAGTTCAAATCCCATATCTTCACATATTTTTGATTTTACCGGAACCTA  
 AAAATTAAGAATTTAGTCACGATTTCTTTGTCTCAGTTGCTACAATCGAAATTAATAGG  
 GGCTGAGAAGTGGTACCAATATCATCTCTCCTAGTGCCAGATACAACATATGGGATTGCG  
 AACCCAAAACCTCTCTCCAGTATACATTTTACTTTGTTTCATACAGGGCACTTGTGT  
 AAAAAAGCATCTGATATCTTTTGACTCTTTTAAATTTGGTCCAAAATTTTTAATGCATATTT  
 GACACTATGGATGATTTCAAATGAAAAAGTTATCGACTGTAAATTAGGTCATAGATTTGCG  
 TCAAGCTCTACAGCGTACTTTATTATATTATATGTGCACGTCTAGTAGATATTCTCCAAA  
 TTGACTTGAGCATATCTAATGCATACTCAGGTATATAAACAATCTCAAATATTAAGTTG  
 ACAAGTACGTACAAAGTTTGTGATACAATATTGATAATAAAATGTGTTTTGATCCAGCT  
 TCATGTCTAGTTAATAATCTTTTTAAACAAGAACCATTATTTAAGTATGCCTGTTCTGA  
 CTTCTATCCCTGCCGGTTCATAGGATTACATTGTTGATTCTAAAAGAACCAGGTAGTGAT  
 GGGACGGTTTGAAGGCCATTTCTACAATAGCGTGTGAGGTATAATATGACATAAATTAG  
 TAATCCCTTCATCCCAAAATATAAGCAATTTTAGAATAGTGATAAATCAAATATTTTTAA  
 CTTTGACTATTAATAGAAAAAATCAAACATGTAAAAATGATATTACTAGTGGATTTATC  
 ATTAATAAACTATCATAATATGTAACCTGTTTATTTAAAACATCATTTTTTTAAAAAAA  
 ATATTGTTGGTCAAAGTATCATCTCAAAGACGGTGTGAAGTCTAAAATTACTTATTTTT  
 TTTTAAATTGAGCGAGGATTTGTTTGCTTTCTATTTGCAACTATGAAGGCCATGTTTAG  
 TTCCCACGCAAAAACTTTTACCCTGTCAAATCTAATGTTTAGACAGATGTATGGAGTAT  
 TAAATATAGACAAAAAACTAATTACATAGATTGTGTGTAAATTGCGAGACGAATCTTT  
 TAAACCTAATTGCTCTATGATTTGACAATGTGGTACTACAGTAAACATTTGCTAATGATG  
 GATTAATTAGGCTTAATAAATTTGTCTCGCAGTTTACACGTGGAATCTGTAATTTGTTTT  
 GTTATTAGTTTACATTTAAATGTTAATGTTGTGTTTCGTATATCCAGTATAACACGCCAAA  
 ACTTTTACCCCTGAACTAAACATTGCCGAAATATTTGCTTGTATCGACTGTTATATG

OsWAKs-Supplemental Data 1[1].txt

GTCTCGGATAATTTAAATTTTGTTCATGTAACCTCGCAGGTTATAACCCAAGACCACAAAA  
ACATAATTGCTCTCGACAATGTGGAACAATCGTTGTCCATTTCTTTTGGCCTTGAAGA  
GGTTTGTGCCGCCAGGGAAGTGTTCAGCTCTCGTGCCTAGGCAAGCCAAATTCTGTGCT  
GCAGTACAATGACTTCATCGGTGTTGAGTATATAAATGTCAGTGAGGGGCTTGTGGCAT  
TAAATACAACCTCATCTTTCTGTTGAGATCTTATTCAATATGTTTTCGCAATTCAGATTTTC  
ATCTCAAGGAGTAGTATCCAACATATTTGGTAAAGGGCCTAACCTGTATGTGGATCCAAC  
GGAATCAGCCTCGGTGCAGTGGGCAGTTGCCAATCTGACCTGCCAACAGGCGCAGCAAAA  
CACTTCGACATATGCTTGTGTAAGTACCAATAGCTCCTGCTCCAGGGTCATCAGCACCAT  
GCAAGGTTATGTTGGCTACAGGTGTAAGTTGTTTGGCTGGTTATGATGGAAATCCATATAT  
CCCAGATGGGTGTAAAGGTAATTATCTCTTTGACCAACTTAGAATTCAACCAGATGGGAT  
ACATATATATATATATACTATATCTCTTATAGTTTTCTGGTGTGGAATTCTGTCTTGT  
CAAATATGAAGTCTCTAATTTTAAATGTTTCAAATATTTTTATTGAATAAACATTTACTGA  
ATAGTTATTTGATCAGTTATTGTTACACTATACATTGACATGCTGAGATATGGTTGCAGA  
TATTGACGAATGCCTACAAACACCACGGATTTGCAAGGAACCTTGCACAATACTGAAGG  
AAACTACAGCTGCACCATGTGCCCTGATCATACAGAGTATGACGTTATAAGAATGCAGTG  
CACTCCAAGAAGAAACCAAAGTCTCTTGTAGGTAGTCTCATAATAATCAATTCCACACT  
GACAAAAGGGTGTATGAAGATATTACAAATGCGATGTTATCATTGTAGGTATTATAATTG  
GCCTTACCATTGGATTTGGTGTGTTGATTCTTAGCTCGATTGTAATAGCTATCATTAGAA  
GATGGAAAAGAGATGTCCATAAAAAAATACGGAGAAAATATTTCCAAAAGAACCAAGGCC  
TCCTCCTAGAACAATTGATATCATCAGATGAAAGTGCTAGTGAGAAGACAAAGATTTTCT  
CCATAGAAGAGCTAAAAAGGGCAACAAATAACTTTGATTCCACACGTATCCTAGGGCATG  
GAGGACATGGCACTATCTACAAAGGTATCTTATCAAACCAACATGTGGTAGCCATAAAAA  
AAGCCAAAGTCATAAAGGAAGGTGAGATCAACGATTTTCATCAACGAGGTTGCCATACTTT  
CTCTAATAAATCACAGAAATATTGTTAAACTCTTTGGATGTTGTCTTGAAACTGAGGTCC  
CCTTATTAGTCTATGACTTTATCCCAAACGGTTCATTATTTGAACTTCTTCATCATGATT  
CAAGTAGCACATTCCCATTGTCTATGGGGCGACCGCTTAAGGATTGCAGCAGAGGCCGAG  
GAGCTCTATGCTATCTACATTCTGCAGCATCTATATCGATCTTCCACCGTGATGTGAAGT  
CCTCTAATACTGTTGGATGCAAATTATACCGCTAAAGTTTCGGATTTTCGGCGCTTCAA  
GATCTGTTCCAGTTGACCAAAGCCATGTTGTTACAAATGTACAGGGCACGTTTCGGTTACT  
TGGATCCAGAATATTACCAAACCGGGCAGCTAAATGAGAAGAGTGATGTCTACAGCTTTG  
GTGTGGTACTCTTGGAGCTTCTTCTAAGAATGCAACCTATTTTTACAACAATGTCAGGGA  
TGAAACAAAATTTGTGTAATTTACTTCTTTTCGGAGATTAAGACCAGACCAATTATAGATT  
TGGTAGATCTCCGGTTCTTGACAAGGCAAAATGAAGAAGATATTAGACAAGTTGCCTCCC  
TTGCTGAGATGTGCATAAAGCTAAAAGGTGAAGAAAGGCCTACAATGAGGCAAGTAGAGA  
TAACACTGCAGCTTTTACGAACAGAAAAGATGACCCCATCACATGTTAGTCCAGACAGAA  
ACCAAGAGATAGAATCACTACTGACTCAAGGAGCCATTGACCAAGTGATTTCATGCTTTAG  
TAAATGTTGACAGAGCTAATGTAGCATCTCAACGCTCTCAAACCTCATGCTATAGCTTGG  
AGAAAGAATTTCTGTCTGCTAGCCTACCACGGTAGAAGTGTTTATCCTTTGTCCCTT  
GTGTTTGGCGTTCTTTGTACTTAAACATTTCTGTGTTTCATAGCACAAATTTACATACA  
TGTGTACCGTTTATA

>OsWAK111 9638.t00862, Chromosome 10, post-processing  
ATGTTACCTTTGCTTTTCATTCTGTTATTGGGGATAGCTCAAGTCAAGAGAAGCTTTGCA  
CTCAGTCCAGTCTCTCTATGCCCATCTCATACCCCATATCCAGAGGGTATGACCAGA  
CGGTTGGAGAAAAGGTTCTTACTGGATCATGGTACCAATCCAAGTCTTCTAATGCATCC  
CTACCCTCCACTTCTACACTCGCTCGCTGTCCAAAGAGATGCGGCAAATTGAGCTTCGAT  
TATCCCTTTGGCATAGGACAAGGTTGTTTCCGCCATGTGATTTTCACTCTCACATGCGAC  
ATGGCCACTCAGCCTCTAAACTCTTCTGAACAATGGATCGACAGAGGTTCTTGGTGAT  
ATTGGGGTAGATGGTCTGAATATCTATTTTATCCACTTCAACTTAATTCCGATCACCTCC  
ACCCATGTCATCCCTATAAATTCGGTGGTGATGTCTACAACCTTTTCATGGAAAAATCCA  
GGGGATTCTTTTACCTTTGCACGACAGGGCATGACATTTGTTGTACCAGCTGTGACTTG  
GATGTATACATGGTAGATCAAGAAAAAAGCACACCTATTTTGTGGCACTATCGCTTGT  
CCCAGCAAAGAGATTGCTGAGATGGTATACAGACAGGATTCTGAAGGCCCTGGTTGGTAC  
ACTATAGATTCACTACCAGCTCGGACAGTTTCACTTACAGTTTGTTCGTCACAAGACCGGT  
AATACCCAAAAGTAACTTAACTTAACCATGTTGTGGGATAGAATCAACATTACTGTGAAG  
GCCAACCTTCTTGGAAATTTGTGGACAAACAAGATGCTTGAATAACATGGAGGATGAC  
AGGAAGAACCATGCTTGTATCAGCAATCACAGTTTCATGTGTCTCCTCGCAGTATATTGAT  
GTTGGCTATGCATGCCGGTGCAATGATGGCTACGTTGGAAATCCCTATATTATGGATGGC  
TGCAAACTCGATGACGGTTATAACCCAAGACCACAAAAACATAATTGCTCTCGACAATGT  
GGAACAATCGTTGTCCATTTCTTTTGGCCTTGAAGAGGGTGTGCGGCCAGGGAAGTG  
TTTCAGTCTCTGACCTAGGCAAGCCAAATCTGTGCTGCAGTACAATGACTTCATCGGT  
TTTCAGTATATAAGTGTGAGGAGGCTTGTGGCATTAAATACAACCTCATCTTTCTGTG  
GAGATCTTATTCAATATGTTTTCGCAATTCAGATTTTTCATCTCAAGGAGTAGTATCCAAC

OsWAKs-Supplemental Data 1[1].txt

ATATTTGGTAAAGGGCCTAACCTGTATGTGGATCCAACGGAATCAGCCTCGGTGCAGTGG  
GCAGTTGCCAATCTGACCTGCCAACAGGCGCAGCAAAACACTTCGACATATGCTTGTGTA  
AGTACCAATAGCTCCTGCTCCAGGGTCATCAGCACCATGCAAGGTTATGTTGGCTACAGG  
TGTAATTTGTTTGCCTGGTTATGATGGAAATCCATATATCCCAGATGGGTGTAAAGGTATT  
ATAATTGGCCTTACCATTGGATTTGGTGTGTTGATTCTTAGCTCGATTGTAATAGCTATC  
ATTAGAAGATGGAAGAGATGTCCATAAAAAAATACGGAGAAAATATTTCCAAAAGAAC  
CAAGGCCTCCTCTAGAACAAATTGATATCATCAGATGAAAGTGCTAGTGAGAAGACAAAG  
ATTTTCTCCATAGAAGAGCTAAAAAGGGCAACAAATAACTTTGATTCCACACGTATCCTA  
GGGCATGGAGGACATGGCACTATCTACAAAGGTATCTTATCAAACCAACATGTGGTAGCC  
ATAAAAAAGCCAAAGTCATAAAGGAAGGTGAGATCAACGATTTTCATCAACGAGGTTGCC  
ATACTTTCTCTAATAAATCACAGAAATATTGTTAACTCTTTGGATGTTGTCTTGAACT  
GAGGTCCCCTTATTAGTCTATGACTTTATCCCAAACGGTTCATTATTTGAACCTTCTTCAT  
CATGATTCAAGTAGCACATTCCCATTGTCATGGGGCGACCGCTTAAGGATTGCAGCAGAG  
GCCGCAGGAGCTCTATGCTATCTACATTCTGCAGCATCTATATCGATCTTCCACCGTGAT  
GTGAAGTCTCTAATATACTGTTGGATGCAAATTATACCGCTAAAGTTTCGGATTTTCGGC  
GCTTCAAGATCTGTTCCAGTTGACCAAAGCCATGTTGTTACAAATGTACAGGGCACGTTT  
GGTTACTTGGATCCAGAATATTACCAAACCGGGCAGCTAAATGAGAAGAGTGATGTCTAC  
AGCTTTGGTGTGGTACTCTTGGAGCTTCTTCTAAGAATGCAACCTATTTTTACAACAATG  
TCAGGGATGAAACAAAATTTGTGTACTTACTTCTTTTCGGAGATTAAGACCAGACCAATT  
ATAGATTTGGTAGACTCTCCGTTCTTGACAAGGCAAATGAAGAAGATATTAGACAAGTT  
GCCTCCCTTGTCTGAGATGTGCATAAAGCTAAAAGGTGAAGAAAGGCCTACAATGAGGCAA  
GTAGAGATAACACTGCAGCTTTTACGAACAGAAAAGATGACCCCATCACATGTTAGTCCA  
GACAGAAACCAAGAGATAGAATCACTACTGACTCAAGGAGCCATTGACCAAGTGATTCAT  
GCTTTAGTAAATGTTGACAGAGCTAATGTAGCATCTCAACGCTCTCAAACCTCATGCTAT  
AGCTTGGAGAAAGAATTCTTGTCTATCTGCTAGCCTACCACGGTAGAAGTGTTTATCCTTT  
GTCCCTTGTGTTTGGCGTTCTTTGTACTTAAAACATTTCTGTGTTTCATAGCACAAATTT  
ACATACATGTGTACCGTTTATA

>OsWAK112, 3738.t00007, Chromosome 10, pre-processing  
ATGGGCCACCTCAATATCATGTTAGCTTTCTTTTCATTTGTGTTATTAGGGTTAGCTGAA  
GTCGAGGGAAGTGTAGCACTGAGTCAAATCCTCTCAAATAGCCATCTGATCACCCCGTAC  
CGAGAGGTTACGGCAAGAAAGTTTGAGAGAAGGTCTTACTGCAGGATCATAGTAGTGAT  
GATAGGAGATCATCTAATGCAAGCCTTCCCTCTGCTGCCACACTTGCTAACTGTCCAAAG  
CGATGCGGCAACTTGAGCTTCGACTATCCCTTCGGCATAGGAGATGGTTGTTTCCGCCAT  
CCCGATTTTCAGTCTCACATGCAACGCCACTACTCAGCCTCCCAAACCTCCTCTTGATATT  
AACGAAAGCGTGGAGGTTATAGATAATATTGAGGTCGTCGGTAAGGATATAGCTGAGTTT  
TTCTACTTCAACTTTTATGTCGCTTTTAAACCATCTCATCCCATAAAAGCTGGTGTC  
GATGTCTATAACCTTACATGGAAGCCCGAGGATTTCTTTTACTATTTTCAGAGATGATG  
ATAATTACTGTCGTCAGCTGCGACTTGGATGTATTCTTGATAGGCCAAGACAACACTCCT  
AACTGCTTTGATGTTGCTTGTCCCAACAAAGAGATTGCAGACATGGTGTACATGCAA  
GACTGTGAAGGCCCTGGCTGTTGTACTGTATTATCTGAAACACCAAGTTTCAGGCTGTACAA  
TTGCAGTTTGTTCGCCATGAGACAAGTAATGCTGGAAAAATCTCCAATCTCAGCATGCTA  
TGGGATAGAAATCAACATAACTATTGGGGCGCCACTTGTGTTGGAGTATTGTTGACCAAACA  
AGATGCTCAAGAAACATGGAAGATAACTTCGCTTGTGTGTCAGCAACCACAGTGGGTGCATA  
ACTTCTGTGTTTAGAGATATTGGCTATGCCTGCCAATGCAATTCTGGCTACAAGGGAAAT  
CCTTTTATCCTTGATGGTTGCAAGCATGACAGCGGTAACCTTCTCCACCATACCTTAATT  
ATCGTATTAATTTAAAGATAAGGATAGCAATCCGGCCTCTATATCTACAGTAGTCAGTA  
GATATACCTTGTGTCGTCGATTACATTTAAAAAACAAGTCACTGTTTTAGTACTTTAA  
ATATCCAAGCATTTGATTTTGTACTGAAAGTCTGAAATCAACATGCACAATCATCTGAT  
TTTGACCTGACATTTGGGAGTTGGGACCGATTGTAATTTGTAACCTTTCTCTTGCTTC  
ACCATGCTATTTGACGCAATGAACAGGATGAGGTAAGTAATATGCTGACGGAGCAATTGA  
ATGTCATATTCAGGATCAAGTATATTCTCTTTAATTCCAGGGAAGTACAAAAAACGA  
ATTATTCAGCAACCACAGAGTAAGTTCTTGTGCTAGTTCCACCCTAGGAAGATCAGCTCG  
GAATATTTTTAGCCACTTGCATTTTTGTCAAAAAATTTGGGAAGTCTGGGATAATTGG  
GTTTGAGATAGAAATTTCTCCATAAATTAGTGAATATATACTTCTGGGGCAACATATT  
TTCCACTTTTTTTCTTCTACTAGGATAAACAGTATATACTGGATTTTATTATTTCCAT  
TTATTCATTTTGGAAATGAAAACATTATCTCTTTTTACCGATACCATATTTTGTGGTCA  
ACAATAGATGACTATACAGTACTTTGATGTTCTCGTACAAAATGAAAATGCACTATTAAT  
CCACTTTATCTATGCGTAAATACATGCATCACTCATTTTTACAAATACAAGTAGGACATG  
TATGCGATCACATCCTATGTACACAAGCTTTGCATGTAACATCGTGCACACCAACTAAC  
AAATATCACAGAAAAATCTAAAGTATTATATCCCAATATAAAATCTTAACCTCAAATTTA  
TTATATTTTTACCTAAAAATAAAATTTGATAATTTTAACTCAAATTTATTATATCTTT



OsWAKs-Supplemental Data 1[1].txt

TTAGATCTAATTTGAAGATAAAATGTATCCGTGCAATTTTATCTATAATTTTCGGTGATA  
TTTGTGTAGTGTGCACGGTATGTACACAGGAAGGCTTATGTGTATACGATTATGTTTC  
CAACATGTATACCTTTTACCAGAAACACGAGAACACTTGGAGATGGGGCATAACATGG  
AGTTTTTACTGATGCCAGGTTACAACCCTAGACCAGAAAAGCATAATTGCGCTCGACAAT  
GTGGGACAATCACAGTCCCGTTTTCCGTTTGGCCTTGAAGAGGGTGTCTCCGCAAGGAAAC  
GTTTTTCAGCTCAACTGCTCCGACAAGACAAATTCGGTCCTCAAGTTCAATGACTATTTTC  
AGGTGACGTATATAAATGTCAGTGAAGGACTTCTGGGCATCAAACACAACCTCATCGCTGG  
AGGAGCAACTATTCAATATAATGATGGAATGATGACTTCTGATAATGAGCCAGACCTAT  
TTGTTGACCCTCTTGAATCAGTCTCTGTGCAATGGGCCGTTGCCAACCTGACATGCCAAG  
AGGCGCAACACAACACTTCTGGATATGCATGTGTAAGTACCAGCAGCTCCTGCTTGAATG  
TCCTTAGCTCCATGGATGGTTATGTTGGCTACAGATGCAGTTGCTTGCCTGGTTATCGTG  
GAAATCCATACATCCTAGATGGCTGCGAAGGTAATTCACCAACTTCATCCCCCAAATTA  
ACATGATTGCTGCAAAGGTCACATTGAATTCAAATCTTTGATATTTAAACAACGAAAAAC  
ATCGACCATATTGGCCTAACAGAGTCAACGATACCAATCACCATGCTGAAACATCAAAT  
TTCAAATGATGTTTCGAGTGGCTGCTCTTCCCTACTGTCATATTTTTATCCTGATCAGTAA  
ATTTTATTAATAAATACTATTAATAATCACAATTTCTCTTATTTTCTACAAATTGAACGA  
TGTTCTTGCATACAAAGCAAAGAGTTTCTCATGGAAATTATCTGACTATCAAACATACAT  
AAGTCCCCAATGTTTTCTTAATATTTATCATTCTAGTGTGATAAAAAAGAATCATGTGGCC  
AATATTTTATTTGGTACATAAATACAGTTTTTTGTTCAAAATTATATATTGCCTTACTGA  
GATGTGTTTTACCGTTACAGATATCGACGAGTCCGAGAGACACCAGGAATTTGTAAAGG  
AGTTTGCAAGAATACCGTTGGAACTACAGCTGCACCAAGTGCCCTGATCATACCGAGTA  
CGATATTTTAAAGATGCAGTGTACTCCAATAAGAAAGAAAAGCTTCTACTTAGGTGAGTC  
CTAATGTCCTATAGTGATCAAACAACACTGGTAGAGGGTGCATTGATATATATCATAGGG  
GATTTTATCATTGTAGGTATTATAATTGGCCTTAGCAGTGGCTTTGGAATGCTACTTCTT  
GGATTAAGTGAATAGTTCTCATTGGAAGATGGAAGACATGCACAGAAAAGACTGCAG  
ACGAAGTATTTCCGAAAGAACAGGGCCTTCTATTGGAACAATTGATATCATCGGATGAA  
AATGCTAGTGAGAAGACAAAAATTTTCTCCTTAGAAGAGCTTAAAAAGGCGACAAATAAC  
TTTGATACCACACGTATCCTTGGCCGTGGAGGGCATGGAACAGTATACAAAGGTATCTTA  
TCTAACCAACATGTGGTGGCTATTAAAAAGGCCAAAGTTATAAGGGAATGCGAGATTAAT  
GATTTTCATCAACGAGGTTTTCGATTCTTTCTCAGATAAATCACCGAAATATTGTTAAACTC  
TTTGGATGCTGTCTTGAACCTGAGGTCCCCTTATTAGTCTATGATTTTATTCCCAATGGT  
TCATTGTTCCGACTACTTCATCCAGATTCCAGTAGCACAATCTATTTATCATGGGGTGAC  
TGCCTAAGGATTGCAGCAGAAGCAGCTGGAGCTCTATATTATCTCCACTCTGCAGCATCA  
ATTTCCATCTTCCACCGTGATGTGAAGTCATCTAATATACTCTTGGATGCAAACATACT  
GCTAAAGTTTCAGATTTTGGTGCTTCAAGATCAGTTCCCATCGATCAAACCCATATCATC  
ACAAATGTACAGGGTACATTTGGTTACTTGGATCCAGAATATTACCAAACCTAGGCAGCTA  
AATGAGAAGAGTGATGTCTATAGTTTTGGTGTGGTACTCCTAGAACTTCTTCTGAGAAAG  
CAACCCATTTTACAATAAATCTGGGATGAAACAAAATTTGTGTAGTTACTTCCTTTCA  
GAGATTAACCAAGGCAATACAGATATGGTCTGATGCTCAAGTTCTCGAAGAAGCAAAT  
GAGGAAGATATCAAAGAAGTTGCATCCCTTGGTGTGATGTGCTTGAAGCTAAAAGGTGAA  
GAAAGGCCACGATGAAGAAAGTAGAGATGACGTTACAGCTTCTGCGAACAAAACGATG  
AACTCATCTCAAGTAGATCCAACCATGACCAAGAGATTCAAACCTGTTCTGACTGAAGGA  
GCCAGTGACCCAGAGATACAACCATAGTAACAAATTTGGATGTTGATAGAGCTAATGCA  
GCATCTCAACGCTTCCAATATCATGCTATAGCTTGGAGCAAGAATTCTTGTCTGCTGCT  
AGCTTACCACGGTAG

>OsWAK112a gi|37988472|dbj|AK111809.1| Oryza sativa (japonica cultivar-group) cDNA  
clone: J013116E20, full insert sequence

GACGCTTAGCTAGACATGCTTATGTTGTTACTAAACATACGTAGACAAGTCCAACTTTATACTTGAGAG  
AATCGAGTAACTCTGTAGCAAGAGTTAGATGGGCCACCTCAATATCATGTTAGCTTTTCTTTTATTGTTG  
GTTATTAGGGTTAGCTGAAGTCGAGGGAAGTGTAGCACTGAGTCAAATCCTCTCAAATAGCCATCTGATC  
ACCCCGTACCGAGAGGTTACGGCAAGAAAGTTTGAGAGAAGGTCTTACTGCAGGATCATAGTAGTGATG  
ATAGGAGATCATCTAATGCAAGCCTTCCCTCTGCTGCCACACTTGCTAACTGTCCAAAGCGATGCGGCAA  
CTTGAGCTTCGACTATCCCTTCGGCATAGGAGATGGTTGTTTCCGCCATCCCGATTTCACTCTCACATGC  
AACGCCACTACTCAGCCTCCCAACTCCTCTTGCATATTAACGAAAGCGTGGAGGTTATAGATAATATTG  
AGGTCGTCGGTAAGGATATAGCTGAGTTTTTCTACTTCAACTTCTTATGGTCGATTTAACCATCTCAT  
CCCCATAAAAGCTGGTGTGATGTCTATAACCTTACATGGAAGCCCCAGGGATTTCTTTTACTATTTCA  
GAGATGATGATAATTACTGTCGTGAGCTGCGACTTGGATGTATTCTTGATAGGCCAAGACAACACTCCTA  
AACTGCTTTGCATGGTTGCTTGTCCCAACAAAGAGATTGCAGACATGGTGTACATGCAAGACTGTGAAGG  
CCCTGGCTGTTGTACTGTATTATCTGAAACACCAGTTCAGGCTGTACAATTGCAGTTTGTTCGCCATGAG  
ACAAGTAATGCTGAAAAATCTCCAATCTCAGCATGCTATGGGATAGAATCAACATAACTATTGGGGCGC  
CACTTGTTGGAGTATTGTTGACCAAAACAGATGCTCAAGAAACATGGAAGATAACTTCGCTTGTGTCAG  
CAACCACAGTGGGTGCATAACTTCTGTGTTTAGAGATATTGGCTATGCCTGCCAATGCAATTCTGGCTAC

OsWAKs-Supplemental Data 1[1].txt

AAGGGAAATCCTTTTATCCTTGATGGTTGCAAGCATGACAGCGGTAACCTTTCTCCACCATACCTTAATTA  
TCGTATTAATTTAAAAGATAAGGATAGCAATCCGGCCTCTATATCTACAGTAGTCAGTAGATATACCTTG  
TCGTCTGATTACATTTTAAAAAACAAGTCACTGTTTTAGTACTTTAAATATCCAAGCATTTGATTTTA  
GTAAGTCTGAAATCAACATGCACAATCATCTGATTTTGACCTGACATTTGGGAGTTGGGACCGAT  
TGTAATTTGTAACCTTTCTCTTGCTTCCACCATGCTATTTGACGCAATGAACAGGATGAGGTAAGTAAT  
ATGCTGACGGAGCAATTGAATGTCATATTCAGGATCAAGTATATTCCTCTTTAATTCAGGGAACTGACA  
AAAAAACGAATTATTCAGCAACCACACGAGTAAGTTCTTGTCAGTTTCCACCCTAGGAAGATCAGCTCGG  
AATATTTTTAGCCACTTGACATTTTTGTCAAAAAATTTGGGAACCTTCTGGGATAATTGGGTTTGCAGATA  
GAATTTTCTCCATAATTAGTGAATATATACTTCTGGGGCAAAACATATTTTCCACTTTTTTTTCTTCTA  
CTAGGATAAACAGTATATACTGGATTTTATTATTTCCATTTATTCATTTTGGAAATGAAAACATTATCTC  
TCTTTTACCGATACCATATTTTGTGGTCAACAATAGATGACTATACAGTACTTTGATGTTCTCGTACAAA  
ATGAAAATGCACTATTAATCCACTTTATCTATGCGTAAATACATGCATCACTCATTTTTTACAAATACAAC  
TAGGACATGTATGCGATCACATCCTATGTACACAAGCTTTGCATGTAAACATCGTGCACACCAACTAACA  
AATATCACAGAAAAATCTAAAGTATTATATCCCAATATAAAATCTTAACCTCAAATTTATTATATTTTA  
CCTAAAAATAAAAAATTTGATAATTTTAAACTCAAATTTATTATATCTTTTTAGATCTAATTTGAAGATAA  
AATGTATCCGTGCAATTTTATCTATAATTTTCCGGTGATATTTGTTGTTAGTGTGCACGGTATGTACACAG  
GAAGGCTTATGTGTATACGATTATGTTTCCAACATGTATACCCTTTTACCAGAAACAACGAGAACACTTG  
GAGATGGGGCATAACATGGAGTTTTTACTGATGCCAGGTTACAACCCTAGACCAGAAAAGCATAATTGCG  
CTCGACAATGTGGGACAATCACAGTCCCGTTTCCGTTTGGCCTTGAAGAGGGTTGCTCCGCAAGGAAACG  
TTTTCAGTCAACTGCTCCGACAAGACAAATTCGGTCCTCAAGTTCAATGACTATTTTTCAGGTGACGTAT  
ATAAATGTCAGTGAAGGACTTCTGGGCATCAAACACAACATCATCGCTGGAGGAGCAACTATTCAATATAA  
TGATGGAAATGATGACTTCTGATAATGAGCCAGACCTATTTGTTGACCCTCTTGAATCAGTCTCTGTGCA  
ATGGGCCGTTGCCAACCTGACATGCCAAGAGGCGCAACACAACACTTCTGGATATGCATGTGTAAGTACC  
AGCAGCTCCTGCTTGAATGTCTTAGCTCCATGGATGGTTATGTTGGCTACAGATGCAGTTGCTTGCCTG  
GTTATCGTGGAAATCCATACATCCTAGATGGCTGCGAAGGTAATTCACCAACTTCATCCCCCAAATTA  
CATGATTGCTGCAAGGTACATTGAATTTCAAATCTTTGATATTTAAACAACGAAAAACATCGACCATT  
TGGCCTAACAGAGTCAACGATACCAATCACCATGCTGAAACATCAAATTTCAAATGATGTTTCGAGTGGC  
TGCTCTTCCCTACTGTATATTTTTATCCTGATCAGTAAATTTTATTAAATTAATTAATAATCACA  
ATTTCTCTTATTTTCTACAAATTGAACGATGTTCTTGATACAAAGCAAAGAGTTCTCATGGAAATTAT  
CTGACTATCAAACATACATAAGTCCCCAATGTTTTCTTAATATTTATCATTCTAGTGTGATAAAAAAGAAT  
CATGTGGCCAATATTTTATTTGGTACATAAATACAGTTTTTTGTTCAAATTTATATATTGCCTTACTGAG  
ATGTGTTTACCGGTTACAGATATCGACGAGTGCCGAGAGACACCAGGAATTTGTAAAGGAGTTTGAAGA  
ATACCGTTGGAACCTACAGCTGCACCAAGTGCCCTGATCATACCGAGTACGATATTTAAGAATGCAAGT  
TACTCCAATAAGAAAGAAAAGCTTCTACTTAGGTATTATAATCGGCCTTAGCAGTGGCTTTGGAATGCTA  
CTTCTTGGATTAAGTGAATAGTTCTCATTGCAAGATGGAAGACATGCACAGAAAAGACTGCAGACGA  
AGTATTTCCGAAAGAACCAGGGCCTTCTATTGGAACAATTGATATCATCGGATGAAAATGCTAGTGAGAA  
GACAAAAATTTTCTCCTTAGAAGAGCTTAAAAAGGCGACAAATAACTTTGATACCACACGTATCCTTGGC  
CGTGAGGGCATGGAACGATATACAAAGGTATCTTATCTAACCAACATGTGGTGGCTATTAAAAAGGCCA  
AAGTTATAAGGGAATGCGAGATTAAATGATTTTCACTCAACAGGTTTCGATTCTTCTCAGATAAATCACCG  
AAATATTGTTAAACTCTTTGGATGCTGTCTTGAACCTGAGGTCCCCTTATTAGTCTATGATTTTATTCCC  
AATGGTTCATTGTTTCGACTACTTCATCCAGATTCCAGTAGCACAACTATTTATCATGGGGTGACTGCC  
TAAGGATTGCAGCAGAAGCAGCTGGAGCTCTATATTATCTCCACTCTGCAGCATCAATTTCCATCTTCCA  
CCGTGATGTGAAGTCATCTAATATACTCTTGGATGCAAACTATACTGCTAAAGTTTCAGATTTTGGTGCT  
TCAGGATCAGTTCCCATCGATCAAACCCATATCATACAAATGTACAGGGTACATTTGGTTACTTGGATC  
CAGAATATTACCAAACTAGGCAGCTAAATGAGAAGAGTATGCTATAGTTTTGGTGTGGTACTCTCAGTA  
ACTTCTTCTGAGAAAGCAACCCATTTTTACAATAAACTCTGGGATGAAACAAAATTTGTGTAGTTACTTC  
CTTTCAGAGATTAAAACCAGGCCAATTACAGATATGGTCGATGCTCAAGTTCTCGAAGAAGCAAATGAGG  
AAGATATCAAAGAAGTTGCATCCCTTGCTGAGATGTGCTTGAAGCTAAAAGGTGAAGAAAGGCCACGAT  
GAAGAAAGTAGAGATGACGTTACAGCTTCTGCGAACAAAAACGATGAACCTCATCTCAAGTAGATCCAACC  
ATTGACCAAGAGATTCAAAGTGTCTGACTGAAGGAGCCAGTGACCCAGAGATACAACCATTAGTAACAA  
ATTTGGATGTTGATAGACTAATGCAGCATCTCAACGCTTCCAATATCATGCTATAGCTTGGAGCAAGA  
ATTCTTGTCTGCTAGCTTACCACGGTAGATGTGTTTATCTATTTCTGATGTGTTTATGTTAACTTGC  
ATATGATTGTGTAATTCAGTCATGTATGTTGAAATGAGAAATTATACTATATGCCATC

>OsWAK112b gi|37988652|dbj|AK111989.1| *Oryza sativa* (japonica cultivar-group) cDNA  
clone: 001-032-C01, full insert sequence  
CATAATTGCGCTCGACAATGTGGGACAATCACAGTCCCGTTTCCGTTTGGCCTTGAAGAGGGTTGCTCCG  
CAAGGAAACGTTTTTCACTCACTGCTCCGACAAGACAAATTCGGTCCTCAAGTTCAATGACTATTTTCA  
GGTGACGTATATAAATGTCAGTGAAGGACTTCTGGGCATCAAACACAACATCATCGCTGGAGGAGCAACTA  
TTCAATATAATGATGGAAATGATGACTTCTGATAATGAGCCAGACCTATTTGTTGACCCTCTTGAATCAG  
TCTCTGTGCAATGGGCGGTTGCCAACCTGACATGCCAAGAGGCGCAACACAACACTTCTGGATATGCATG  
TGTAAAGTACCAGCAGCTCCTGCTTGAATGCTTGAATGCTTGAATGCTTGAATGCTTGAATGCTTGAATGCT  
TGCTTGCCTGGTTATCGTGGAAATCCATACATCCTAGATGGCTGCGAAGATATCGACGAGTGCCGAGAGA

OsWAKs-Supplemental Data 1[1].txt

CACCAGGAATTTGTAAAGGAGTTTGCAAGAATACCGTTGGAAACTACAGCTGCACCAAGTGCCTGATCA  
TACCGAGTACGATATTTTAAAGATGCAGTGTACTCCAATAAGAAAGAAAAGCTTCTACTTAGGTATTATA  
ATTGGCCTTAGCAGTGGCTTTTGGAAATGCTACTTCTTGGATTAAGTGGAATAGTTCTCATTGGAAGATGGA  
AAAGACATGCACAGAAAAGACTGCAGACGAAGTATTTCCGAAAGAACCAGGGCCTTCTATTGGAACAATT  
GATATCATCGGATGAAAATGCTAGTGAGAAGACAAAAATTTTCTCCTTAGAAGAGCTTAAAAAGGCGACA  
AATAACTTTTGATACCACACGTATCCTTGGCCGTGGAGGGCATGGAACAGTATACAAAGGTATCTTATCTA  
ACCAACATGTGGTGGCTATTA AAAAGGCCAAAGTTATAAGGGAATGCGAGATTAATGATTTTCATCAACGA  
GGTTTCGATTCCTTCTCAGATAAATCACCGAAATATTGTTAAACTCTTTGGATGCTGTCTTGAAACTGAG  
GTCCCCTTATTAGTCTATGATTTTTATTCCCAATGGTTCATTGTTTCGGACTACTTCATCCAGATTCCAGTA  
GCACAATCTATTTATCATGGGGTGAAGTGCCTAAGGATTGCAGCAGAAGCAGCTGGAGCTCTATATTATCT  
CCACTCTGCAGCATCAATTTCCATCTTCCACCGTGATGTGAAGTCATCTAATATACTCTTGGATGCAAC  
TATACTGCTAAAGTTTCAGATTTTGGTGCTTCAAGATCAGTTCCCATCGATCAAACCCATATCATCACAA  
ATGTACAGGGTACATTTGGTTACTTGGATCCAGAATATTACCAAAGTGGCAGCTAAATGAGAAGAGTGA  
TGTCTATAGTTTTGGTGTGGTACTCCTAGAAGTCTTCTGAGAAAGCAACCCATTTTTACAATAAACTCT  
GGGATGAAACAAAATTTGTGTAGTTACTTCTTTCAGAGATTA AAAACCAGGCCAATTACAGATATGGTCG  
ATGCTCAAGTCTCGAAGAAGCAAATGAGGAAGATATCAAAGAAGTTCATCCCTTGCTGAGATGTGCTT  
GAAGCTAAAAGGTGAAGAAAGGCCACGATGAAGAAAGTAGAGATGACGTTACAGCTTCTGCGAACAAAA  
ACGATGAAGTCACTCAAGTAGATCCAACATTGACCAAGAGATTCAAAGTCTTCTGACTGAAGGAGCCA  
GTGACCCAGAGATACAACCATTAGTAACAAATTTGGATGTTGATAGAGCTAATGCAGCATCTCAACGCTT  
CCAAATATCATGCTATAGCTTGGAGCAAGAATTCTTGTCTGCTAGCTTACCACGGTAGATGTGTTTA  
TCTTATTTCTGATGTGTTTAGTTAAGTTGATATGTATTGTGTACTTGCAGTCATGTATGTTGAAATGAG  
AAATTATACTATATGCCAAAAAATAAATC

OsWAK112c gi|37988159|dbj|AK111496.1| *Oryza sativa* (japonica cultivar-group) cDNA  
clone: J013000H18, full insert sequence

GGGCACATGCTTAGCTAGACATGCTTATGTTGTTACTAAACATACGTAGACAAGTCCAAACTTTATACTT  
GAGAGAATCGAGTATCTCTGTAGCAAGAGTTCAGATGGGCCACCTCAATATCATGTTAGCTTTCCCTTCA  
TTTGTGTTATTAGGGTTAGCTGAAGTCGAGGGAAGTGTAGCACTGAGTCAAATCCTCTCAAATAGCCATC  
TGATACCCCGTACCGAGAGGTTACGGCAAGAAAGTTTGAGAGAAGGTCCTTACTGCAGGATCATAGTAG  
TGATGATAGGAGATCATCTAATGCAAGCCTTCCCTCTGCTGCCACACTTGCTAACTGTCCAAAGCGATGC  
GGCAACTTGAGCTTCGACTATCCCTTCCGCATATGAGATGGTTGTTTCCGCCATCCCGATTTAGTCTCA  
CATGCAACGCCACTACTCAGCCTCCCAAAGTCTTCTGATATTAACGAAAGCGTGGAGGTTATAGATAA  
TATTGAGGTCGTCGGTAAGGATATAGCTGAGTTTTCTACTTCAACTTCTTTATGGTCGCAITTAACCAT  
CTCATCCCCATAAAAGCTGGTGTGATGTCTATAACCTTACATGGAAAGCCCCAGGGATTTCTTTTACTA  
TTTCAGAGATGATGATAATTACTGTCGTCAGCTGCGACTTGGATGTATTCTTGATAGGCCAAGACAACAC  
TCCTAAACTGCTTTGCATGGTTGCTTGTCCCAACAAAGAGATTGCAGACATGGTGATACATGCAAGACTGT  
GAAGGCCCTGGCTGTTGTACTGTATTATCTGAAACACCAGTTCAGGCTGTACAATTGCAGTTTGTTCGCC  
ATGAGACAAGTAATGCTGGA AAAATCTCCAATCTCAGCATGCTATGGGATAGAATCAACATAACTATTGG  
GGGCCCACTTGTGTTGGAGTATTGTGACCAACAAGATGCTCAAGAAACATGGAAGATAACTTCGTTGT  
GTCAGCAACCACAGTGGGTGCATAACTTCTGTGTTTAGAGATATTGGCTATGCCTGCCAATGCAATTCTG  
GCTAGCAAGGGAAATCCTTTTATCCTTGATGGTTGCAAGCATAACAGCGTTACAACCCTAGACCAGAAA  
AGCATAATTGCGCTCGACAATGTGGGACAATCACAGTCCCGTTCCGTTTGGCCTTGAAGAGGGTTGCTC  
CGCAAGGAAACGTTTTAGCTCAACTGCTCCGACAAGACAAATTCGGTCTCAAGTTCATGACTATTTT  
CAGGTGACGTATATAAATGTAGTGAAGGACTTCTGGGCATCAAACACAACCTCATCGCTGGAGGAGCAAC  
TATTCAATATAATGATGGAATGATGACTTCTGATAATTGAGCCAGACCTATTTGTTGACCTCTTGAATC  
AGTCTCTGTGCAATGGGCCGTTGCCAACCTGACATGCCAAGAGGCGCAACACAACACTTCTGGATATGCA  
TGTGTAAGTACCAGCAGCTCCTGCTTGAATGTCCTTAGCTCCATGGATGGTTATGTTGGCTACAGATGCA  
GTTGCTTGCCTGGTTATCGTGGAATCCATACATCCTAGATGGCTGCGAAGATATCGACGAGTGCCGAGA  
GACACCAGGAATTTGTAAAGGAGTTTGCAAGAATACCGTTGGAAACTACAGCTGCACCAAGTGCCTGAT  
CATACCGAGTACGATATTTTAAAGATGCAGTGTACTCCAATAAGAAAGAAAAGCTTCTACTTAGTATTA  
TAATTGGCCTTAGCAGTGGCTTTGGAATGCTACTTCTTGGATTAAGTGGAATAGTTCTCATTGGAAGATG  
GAAAAGACATGCACAGAAAAGACTGCAGACGAAGTATTTCCGAAAGAACCAGGGCCTTCTATTGGAACAA  
TTGATATCATCGGATGAAAATGCTAGTGAGAAGACAAAAATTTTCTCCTTAGAAGAGCTTAAAAAGGCGA  
CAAATAACTTTTGATACCACACGTATCCTTGGCCGTGGAGGGCATGGAACAGTATACAAAGGTATCTTATC  
TAACCAACATGTGGTGGCTATTA AAAAGGCCAAAGTTATAAGGGAATGCGAGATTAATGATTTTCATCAAC  
GAGGTTTCGATTTCTCAGATAAATCACCGAAATATTGTTAAACTCTTTGGATGCTGTCTTGAACCTG  
AGGTCCCCTTATTAGTCTATGATTTTTATTCCCAATGGTTCATTGTTTCGGACTACTTCATCCAGATTCCAG  
TAGACAATCTATTTATCATGGGGTGAAGTGCCTAAGGATTGCAGCAGAAGCAGCTGGAGCTCTATATTAT  
CTCCACTCTGCAGCATCAATTTCCATCTTCCACCGTGATGTGAAGTCATCTAATATACTCTTGGATGCAA  
ACTATACTGCTAAAGTTTCAGATTTTGGTGCTTCAAGATCAGTTCCCATCGATCAAACCCATATCATCAC  
AAATGTACAGGGTACATTTGGTTACTTGGATCCAGAATATTACCAAAGTGGCAGCTAAATGAGAAGAGT  
GATGTCTATAGTTTGGTGTGGTACTCCTAGAAGTCTTCTGAGAAAGCAACCCATTTTTACAATAAACT  
CTGGGATGAAACAAAATTTGTGTAGTTACTTCTTTCAGAGATTA AAAACCAGGCCAATTACAGATATGGT

OsWAKs-Supplemental Data 1[1].txt

CGATGCTCAAGTTCTCGAAGAAGCAAATGAGGAAGATATCAAAGAAGTTGCATCCCTTGCTGAGATGTGC  
TTGAAGCTAAAAGGTGAAGAAAGGCCACGGTGAAGAAAGTAGAGATGACGTTACAGCTTCTGCGAACAA  
AAACGATGAACATCATCTCAAGTAGATCCAACCATTTGACCAAGAGATTCAAAGTCTGACTGAAGGAGC  
CAGTGACCCAGAGATACAACCATTTAGTAACAAATTTGGATGTTGATAGAGCTAATGCAGCATCTCAACGC  
TTCCAAATATCATGCTATAGCTTGGAGTAAGAATTTCTGTCATCTGCTAGCTTACCACGGTAGATGTGTT  
TATCCTATTTCTGATGTGTTTAGTTAACTTGCATATGTATTGTGTACTTGCAGTCATGTATGTTGAAATG  
AGAAATTATACTATATGCCATC

OsWAK112d gi |37988478|dbj |AK111815.1| Oryza sativa (japonica cultivar-group)  
cDNA clone: J013130K07, full insert sequence

GATGCTTAGCTAGACATGCTTATGTTGTTACTAAACATACGTAGACAAGTCCAACTTTTATACTTGAGAG  
AATCGAGTATCTCTGTAGCAAGAGTTTCTGATGGGCCACCTCAATATCATGTTAGCTTTCTTTTCAATTTGT  
GTTATTAGGGTTAGCTGAAGTCGAGGGAAGTGTAGCACTGAGTCAAATCCTCTCAAATAGCCATCTGATC  
ACCCCGTACCGAGAGGTTACGGCAAGAAAGTTTGAGAGAAGGTCCTTACTGCAGGATCATAGTAGTGATG  
ATAGGAGATCATCTAATGCAAGCCTTCCCTCTGCTGCCACACTTGCTAACTGTCCAAAGCGATGCGGCAA  
CTTGAGCTTCGACTATCCCTTCGGCATAGGAGATGGTTGTTTCCGCCATCCCGATTTTCACTCTCACATGC  
AACGCCACTACTCAGCCTCCCAAACCTCTTGCATATTAACGAAAGCGTGGAGGTTATAGATAATATTG  
AGGTGCTCGGTAAGGATATAGCTGAGTTTTTCTACTTCAACTTCTTTATGGTCGCATTTAACCATCTCAT  
CCCCATAAAAGCTGGTGTGCTGCTATAACCTTACATGGAAAGCCCCAGGGATTTCTTTTACTATTTCA  
GAGATGATGATAATTACTGTCGTCAGCTGCGCATTTGGATGTATTCTTGATAGGCCAAGACAACACTCCTA  
AACTGCTTTGTCATGGTTGCTTGTCCCAACAAAGAGATTGCAGACATGGTGTACATGCAAGACTGTGAAGG  
CCCTGGCTGTTGACTGTATTATCTGAAACACCAGTTTCAAGGCTGTACAATTGCAGTTTGTTCGCCATGAG  
ACAAGTAATGCTGGAAAAATCTCCAATCTCAGCATGCTATGGGATAGAATCAACATAACTATTGGGGCGC  
CACTTGTTTGGAGTATTGTTGACCAACAAGATGCTCAAGAAACATGGAAGATAACTTCGCTTGTGTCAA  
CCACAGTGGGTGCATAACTTCTGTGTTTAGAGATATTGGCTATGCCTGCCAATGCAATTCTGGCTACAAG  
GGAAATCCTTTTATCCTTGATGGTTGCAAGCATGACAGCGGTTACAACCCTAGACCAGAAAAGCATAATT  
GCGCTCGACAATGTGGGACAATCACAGTCCCGTTTTCCGTTTGGCCTTGAAGAGGGTTGCTCCGCAAGGAA  
ACGTTTTTCACTCAACTGCTCCGACAAGACAAATTCGGTCTCAAGTTCAATGACTATTTTCAAGTGACG  
TATATAAATGTGAGTGAAGGACTTCTGGGCATCAAACACAACCTCATCGCTGGAGGAGCAACTATTCAATA  
TAATGATGGAATGATGACTTCTGATAATGAGCCAGACCTATTTGTTGACCTCTTGAATCAGTCTCTGT  
GCAATGGGCCGTTGCCAACCTGACATGCCAAGAGGCGCAACACAACACTTCTGGATATGCATGTGTAAGT  
ACCAGCAGCTCCTGCTTGAATGTCTTACTGCTTCCATGGATGGTTATGTTGGCTACAGATGCAGTTGCTTGC  
CTGGTTATCGTGGAATCCATACATCCTAGATGGCTGCGAAGATATCGACGAGTGCCGAGAGACACCAGG  
AATTTGTAAAGGAGTTTGAAGAATACCGTTGGAACCTACAGCTGCACCAAGTGCCCTGATCATACCGAG  
TACGATATTTTAAAGATGCAGTGTACTCCAATAAGAAAGAAAAGCTTCTACTTAGGTATTATAATTGGCC  
TTAGCAGTGGCTTTGGAATGCTACTTCTTGGATTAAGTGAATAGTTCTCATTGCAAGATGGAAGGACA  
TGCACAGAAAAGACTGCAGACGAAGTATTTCCGAAAGAACAGGGCCTTCTATTGGAACAATTGATATCA  
TCGGATGAAAATGCTAGTGAGAAGACAAAATTTTCTCTTAGAAGAGCTTAAAAAGGCGACAAATAACT  
TTGATACCAACAGTATCCTTGGCCGTGGAGGGCATGGAACAGTATACAAAGGTATCTTATCTAACCAACA  
TGTGGTGGCTATTAAGAAAGGCCAAAGTTATAAGGGAATGCGAGATTAATGATTTTATCAACGAGGTTTGC  
ATTCTTTCTCAGATAAATCACCGAAATATTGTTAACTCTTTGGATGCTGTCTTGAACTGAGGTCCCT  
TATTAGTCTATGATTTTATCCCAATGGTTTCTTGGACTACTTCATCCAGATTCCAGTAGCACAAAT  
CTATTTATCATGGGGTACTGCCTAAGGATTGCAGCAGAAGCAGCTGGAGCTCTATATTATCTCCACTCT  
GCAGCATCAATTTCCATCTTCCACCGTGATGTGAAGTCATCTAATATACTCTTGGATGCAAACTATCTG  
CTAAAGTTTCAAGATTTTGGTGCTTCAAGATCAGTCCCCTGATCAAAACCATATCATCACAAATGTACA  
GGGTACATTTGGTTACTTGGATCCAGAATATTACCAAACCTAGGCAGCTAAATGAGAAGAGTGATGTCTAT  
AGTTTTGGTGTGGTACTCCTAGAATCTTCTGAGAAAGCAACCCATTTTACAATAAACTCTGGGATGA  
AACAAAATTTGTGTAGTTACTTCTTTTCAAGAGATTAACCAAGGCCAATTACAGATATGGTCGATGCTCA  
AGTTCTCGAAGAAGCAAATGAGGAAGATATCAAAGAAGTTGCATCCCTTGCTGAGATGTGCTTGAAGCTA  
AAAGGTGAAGAAAGGCCACGATGAAGAAAGTAGAGATGACGTTACAGCTTCTGCGAACAACAAACGATGA  
ACTCATCTCAAGTAGATCCAACCATTTGACCAAGAGATTCAAAGTCTGACTGAAGGAGCCAGTGACCC  
AGAGATACAACCATTAGTAACAAATTTGGATGTTGATAGAGCTAATGCAGCATCTCAACGCTTCCAAATA  
TCATGCTATAGCTTGGAGCAAGAATTTCTGTCATCTGCTAGCTTACCACGGTAGATGTGTTTATCCTATT  
TCTGATGTGTTTAGTTAACTTGCATATGTATTGTGTACTTGCAGTCATGTATGTTGAAATGAGAAATTAT  
ACC

>OSWAK113 3170.t00013, Chromosome 10, pre-processing  
ATGGAGCTTTTGTCTTGTGTTTCTTCTTCTGGCGGCTATGTGAGCCGCGGTGGAGAGC  
ATCACGAGCACGGCGGTGAAAACGGGGTGCCAGGAGCGCTGCGGCGGCGTGGACATCCCC  
TACCCTTTTGGCATCGGGCCCCGATGCTCCCGCCACGGCTTCGAGCTCTCGTGTGTGAGC  
AACGGCAGCGCGCGCGGCGGATCGCGGTGCTCGCGGCGACGTCGATCCAGGTGACGCGC  
CTGTCCGTGAGCGCGCGGCGGATCGCAGGTGATGCTCCCGTGGGGTGGCAGTGCTACAAC  
ACCTCGCAGCCGACAGGACATACCCCGACTGGAGCCGCGCGAAGACGGAGATGAACCGC

# OsWAKs-Supplemental Data 1[1].txt

GGCGGAGTGTAACGCATCTCCAACACCCACAACATGCTGGTCGTGCTCGGCTGCAACACC  
 GTCGGCTACACTGAGAGCTTGAGGAGCGAGGGAGGCGCCTACTCCAGCACATACTACATC  
 GGCTGCATGTCTCTATGCAACAACCTCGGCGAGCGCGCAGGACGGCCAGTGCGCCGGCGTC  
 GGCTGCTGCCACGTGACATCCCACCGGGGCTCACCGACAGCTCCGTCAACTTCCGGGTG  
 TACGACCACACCGGTATGGTGGACTACAGCCCCTGTGACTACGCCTTCCTCACCGACCGG  
 ACCAACTACAGCTTCCGGCGAGCCGACCTCATCAAGATGGACAAGAACCAGGAACGTTCCG  
 GTGTGGCTTGACTGGGCGATCCGCGAGAACGGCTCCATGTCTGCGCTGAGGCCAAGGGC  
 AAGCCAGGGTACGCCTGTGTACGCGTCCACAGCGAGTGCGTCGACTCTACTAATGGTCCG  
 GGTTACAACGTCAAGTGTAACGCAGGCTACGAGGGAAACGCCTATGCTCCTGATGGATGT  
 ACTAGTAAGTAA

>OsWAK113, 3170.t00013, Chromosome 10, post-processing  
 ATGGAGCTTTTGTCTTCTGTGTTTCTTCTTCTGGCGGCTATGTGAGCCGCCGTGGAGAGC  
 ATCAGGAGCAGCGCGGTGAAAACGGGGTCCAGGAGCGCTGCGGCGCGGTGGACATCCCC  
 TACCCCTTTCGGCATCGGGCCCGGATGCTCCCGCCACGGCTTCGAGCTCTCGTGTGTGAGC  
 AACGGCAGCGGCGCGGCGCCGATCGCGGTGCTCGCCGGCACGTGATCCAGGTGACGCGC  
 CTGTCCGTGAGCCGGCCGAGTGCAGGTGATGCTCCCCGTGGGGTGGCAGTGCTACAAC  
 ACCTCGCAGCCGACCAGGACATACCCCGACTGGAGCCGCGCGAAGACGGAGATGAACCGC  
 GGCGGAGTGTAACGCATCTCCAACACCCACAACATGCTGGTCGTGCTCGGCTGCAACACC  
 GTCGGCTACACTGAGAGCTTGAGGAGCGAGGGAGGCGCCTACTCCAGCACATACTACATC  
 GGCTGCATGTCTCTATGCAACAACCTCGGCGAGCGCGCAGGACGGCCAGTGCGCCGGCGTC  
 GGCTGCTGCCACGTGACATCCCACCGGGGCTCACCGACAGCTCCGTCAACTTCCGGGTG  
 TACGACCACACCGGTATGGTGGACTACAGCCCCTGTGACTACGCCTTCCTCACCGACCGG  
 ACCAACTACAGCTTCCGGCGAGCCGACCTCATCAAGATGGACAAGAACCAGGAACGTTCCG  
 GTGTGGCTTGACTGGGCGATCCGCGAGAACGGCTCCATGTCTGCGCTGAGGCCAAGGGC  
 AAGCCAGGGTACGCCTGTGTACGCGTCCACAGCGAGTGCGTCGACTCTACTAATGGTCCG  
 GGTTACAACGTCAAGTGTAACGCAGGCTACGAGGGAAACGCCTATGCTCCTGATGGATGT  
 ACTAGTAAGTAA

>OSWAK114, 3170.t00015, Chromosome 10, pre-processing  
 ATGCACACTGAAAACACACAATATTTGTAGGCATCACTCTTGGCATTTCCTTTTTGATC  
 GTTGGTCTCCTATTCTATTCTAATGATGCGCCAAAAGAGAAGAATGAATGAATATTTGAGA  
 AAGAATGGTGGTTCAGTACTACAGAAAGTAGAGAACATCAAGATTTTTACCAAGGATGAG  
 CTTAAGAAAATAACAAAGAACAATTCAGAAGTTCTTGGTCAAGGAGGCTTTGGCAAAGTC  
 TATAAAGGGATTCTTGAAGATAACACCTTGGTGGCAGTGAAAGCCTCAATTGAGGTAAAT  
 GACGCTCGAAAAGAGGATTTTTACCAATGAAGTTATCATCCAATCTCAAATGATTCACACA  
 AATATCATCAAGCTCTTAGGGTGTGTTTGGAGGTGGATGTTCCAATGTTGGTTTATGAG  
 TTTGCTGCAAATGGAATCTACAAGACATTCTCCATGGTGACAACAACCGTCGAGTCCCA  
 CTCCCACCTTGACTTGCAGATGGACATTGCAGTTGAAGCTGCAGAAGGGCTAAGATATATG  
 CACTCATCCGCAAACCGCACCATACGACATGGTGTGTTAAACCAGCCAACATACTTCTG  
 AATGACAAATTCAAACCTAAGATTTTCAAGCTTCCGGACATCCAAGCTGCTTACCGTGGAT  
 AAAGACTTCACTATGTTTGTAGTGGGGAGCATGGGTACATAGACCCTGTGTTTCATAAA  
 ACCGGGCGTTTTAACACAAAAGAGTGATGTCTACAGTTTTGGAGTCGTTCTATTAGAGCTC  
 ATCACCAGGAAGCAACAATATATGATGCTAATTGCAGTCTCTTAATTGACTTCCAAAAG  
 GCCTATGAGCAAGAAAATAGTGGGAGGGCAATGTTTCGACAAAGATTTTACAATTGAAGAA  
 GAAATATTCATTTTGAAGAAATTGGTCGATTAGCAATGGAGTGCCTGAAAGAAAAGGTT  
 GAAGAACGGCCTGATATGAAGGAAGTTGCGGAACAACCTTGTGATTCTAAGAAGATCTAGG  
 AAGAGCAGACAAGGAACTACAACATAAGTCCACAACAATTTGAGGAGATGAGTACTGAA  
 GGAATCCATTGAGCTTGGAACTGCTGTTAGTGAAGTAGCTCAGTCCTTTCTGCTCCA  
 TCCACTCCAGCCAACAATGACTTCTCCAACGCTTAG

>OsWAK114, 3170.t00015, Chromosome 10, post-processing  
 ATGCACACTGAAAACACACAATATTTGTAGGCATCACTCTTGGCATTTCCTTTTTGATC  
 GTTGGTCTCCTATTCTATTCTAATGATGCGCCAAAAGAGAAGAATGAATGAATATTTGAGA  
 AAGAATGGTGGTTCAGTACTACAGAAAGTAGAGAACATCAAGATTTTTACCAAGGATGAG  
 CTTAAGAAAATAACAAAGAACAATTCAGAAGTTCTTGGTCAAGGAGGCTTTGGCAAAGTC  
 TATAAAGGGATTCTTGAAGATAACACCTTGGTGGCAGTGAAAGCCTCAATTGAGGTAAAT  
 GACGCTCGAAAAGAGGATTTTTACCAATGAAGTTATCATCCAATCTCAAATGATTCACACA  
 AATATCATCAAGCTCTTAGGGTGTGTTTGGAGGTGGATGTTCCAATGTTGGTTTATGAG  
 TTTGCTGCAAATGGAATCTACAAGACATTCTCCATGGTGACAACAACCGTCGAGTCCCA  
 CTCCCACCTTGACTTGCAGATGGACATTGCAGTTGAAGCTGCAGAAGGGCTAAGATATATG  
 CACTCATCCGCAAACCGCACCATACGACATGGTGTGTTAAACCAGCCAACATACTTCTG  
 AATGACAAATTCAAACCTAAGATTTTCAAGCTTCCGGACATCCAAGCTGCTTACCGTGGAT

# OsWAKs-Supplemental Data 1[1].txt

AAAGACTTCACTATGTTTGTAGTGGGGAGCATGGGTTACATAGACCCTGTGTTTCATAAA  
 ACCGGGCGTTTTAACACAAAAGAGTGATGTCTACAGTTTTGGAGTCGTTCTATTAGAGCTC  
 ATCACCAGGAAGCCAACAATATATGATGCTAATTGCAGTCTCTTAATTGACTTCCAAAAG  
 GCCTATGAGCAAGAAAATAGTGGGAGGGCAATGTTGACAAAAGATTTTACAATTGAAGAA  
 GAAATATTCATTTTGGAAGAAATTGGTCGATTAGCAATGGAGTGCCTGAAAGAAAAGGTT  
 GAAGAACGGCCTGATATGAAGGAAGTTGCGGAACAACCTTGTGATTCTAAGAAGATCTAGG  
 AAGAGCAGACAAGGAAACTACAACATAAGTCCACAACAATTTGAGGAGATGAGTACTGAA  
 GGAAGTCCATTGAGCTTGGAAACTGCTGTTAGTGAAGTAGCTCAGTCCTTTCTGCTCCA  
 TCCACTCCAGCCAACAATGACTTCTCCAACGCTTAG

>OsWAK115, 3580.t00004, Chromosome 10, pre-processing

ATGGATCGATTTGCCATGCCATGCCAGGTCTCTGTTGACCTCGTCCATCGCCATTGCGCA  
 ATCGGTGTAGCTATGCTGCTAGCTGATCGATCAGTTATGGCGATCCAGCAACCACGAGCT  
 CTCAATTATGAAGGCAGCCGTAATCACACGCAGCGAGAGAGAGAAGGCGCAACGAGAGTA  
 ATGGAGGTGTTTTAGTTTTGGAGGGCACTTGATGGCTGGCGCTGATCACTCCAGCAGCG  
 GCGCTGGCGCAGCAGGAGGAGGCGCGGGATGCCGGCGGCGGTGCGGCAACGTGACCGTC  
 CCCTACCCCTTCGGCATCGGCTCCGAGCGCTGCTACCGCGGCGGCGTGCAGGGGTTTTCGC  
 CTCGACTGCGACGACGCCGACGCCGCGCGCCTCACAGTTGCCGGCTACGGCCACGAG  
 GTGACCTCCATCTCCCTCGCCGCGCGGAGGTACCGTGCTGCTCAACGCCAGCCGCGCG  
 TGCTACGGCGGGCGGCACTACGGGCGCGCGCGCGGGGCGGGAGGAGCAGCCATGTCC  
 CTCAACGGCAGCGCGTTCCTCTCTCGTCCATGAAGAGCAAGTTCGTGCGCATCGGCTGC  
 CCCGGCCTCGCCTACTTCGTGACGACGCGCGGGGACTACGTACCGGCTGCATGTCCGTG  
 TGCCGGCCGTGCGGCGCGGGCGCTGCCGGGCTCGTGCCGGGGCGACGACGGCTGCTGCCAG  
 AGCAACATCCCGCTCGGGCTCGCCTCCTACCGGCCGCGCCTCCGCAGCTTCGGCCGCCGC  
 CAGGGCGGCGCCTTCCTTGCCAACGCCACCGCCTGCGCCTACGCTTTTCATGGTGGACGCA  
 TGGTGTTCTGTTACGCCGGCTCAAACCTTCAACCGGACGGGCGACTTCGCCGTGCCCGTC  
 GTGCTGGACTGGGCCATCCGGCCGACGCCGGGAGCGGGAGCGGGAGCGGGAGCTGCGCC  
 GCCGCAAGCCGCACGCCGCTGCCGTGCTACGCTGCCGGAGCGCGCACAGCGTCTGCATC  
 GACTCCAGCAACGGCCCTGGGTATATCTGCAACTGCACCGCCGGGTACCACGGCAACCCG  
 TACGTGCTGCGGCACTGCACAGGTCTAAATCTAATTTTTGGTTACTCCTCCGTTTTAGAA  
 TATAAATCGTTTTTATTAAGTTTGTAGACAAATTTAATATTTTACAACATCAAATTAAT  
 TTTATTAATAATAATTAATATATTTTTATAATATATTTGTCTTGGCTAAAAATATTG  
 TTATCTTTTTTACTAACTTGATCAAACCTTTAAATAACAGTTTGACTTTTACTAAAATCAA  
 AACGACTTATAATCTGAAATGGAGAGAGGTACTTCTCTCCCTCTCATCATCATCCCACTT  
 CAGTTCATCCTGATGGTGATGTTTTCTGGCCTTTAATTAATTACTTCTCATGTTATTTG  
 TGGATTTAAATTGAAACAAATTATTAAGACATCAACGAGTGCGAGCACAAAGATGAGTAC  
 CCCTGCTACGGCGTCTGCACCAATACGGCAGGCACTACGCTTGCTCTTGCCCCAAGGGA  
 TCCAGTGGAATGCCAGCGTGGAGGGTGGCTGCCGCGCGACGACAAGTTCACTCTAGCA  
 CTCAAGACGGTCACAGGTACCTACGAAAGATTTTTTTTATATATTTTATATATTTTTAT  
 ATACCTTTCCAAAAAGTATTTTTAAATATGAATTTTGACTACGCCAGCCTGTGGCCAAAT  
 AACTTTGTACAGTCACGCACAGCTGGCGCGGCGAGTGCTGTCTGCCACACTAGCCTCTTG  
 CCACGCTACCATGGCTGGCGTGGCAAAACAACGCTTCAACGCCAAAAGGTTTAGTTTTTG  
 AAATATTTTTTAAAGACGGTATATTAATAAAATTAATAAAAGTCTAAAAAATAA  
 AAAAAATTCTCTACAAAACGGGATTCTTCACTTAAACAACAATAATCTTGACTTTATAT  
 CACTATGTCACTGAACCGAAAATCACCTGACACTGACGTTACAGCAGAGGATCCATATCT  
 GTTGTACCAATATATGATACCTCTGTCCAAAATATTAGGACAAGATGATATTACTTGT  
 CGGATTGTAATATTAGGAAATATCACCTTCTACACTAGTCGTAATAATTTGAGTTTGGA  
 GAAAGCAGTGACAGATAAGCCAGCAGCTTAG

>OsWAK115, 3580.t00004, Chromosome 10, post-processing

ATGGATCGATTTGCCATGCCATGCCAGGTCTCTGTTGACCTCGTCCATCGCCATTGCGCA  
 ATCGGTGTAGCTATGCTGCTAGCTGATCGATCAGTTATGGCGATCCAGCAACCACGAGCT  
 CTCAATTATGAAGGCAGCCGTAATCACACGCAGCGAGAGAGAGAAGGCGCAACGAGAGTA  
 ATGGAGGTGTTTTAGTTTTGGAGGGCACTTGATGGCTGGCGCTGATCACTCCAGCAGCG  
 GCGCTGGCGCAGCAGGAGGAGGCGCGGGATGCCGGCGGCGGTGCGGCAACGTGACCGTC  
 CCCTACCCCTTCGGCATCGGCTCCGAGCGCTGCTACCGCGGCGGCGTGCAGGGGTTTTCGC  
 CTCGACTGCGACGACGCCGACGCCGCGCGCCTCACAGTTGCCGGCTACGGCCACGAG  
 GTGACCTCCATCTCCCTCGCCGCGCGGAGGTACCGTGCTGCTCAACGCCAGCCGCGCG  
 TGCTACGGCGGGCGGCACTACGGGCGCGGCGCGCGGGGCGGGAGGAGCAGCCATGTCC  
 CTCAACGGCAGCGCTTCCTCTCTCGTCCATGAAGAGCAAGTTCGTGCGCATCGGCTGC  
 CCCGGCCTCGCCTACTTCGTGACGACGCGGGGACTACGTACCGGCTGCATGTCCGTG  
 TGCCGGCCGTGCGGCGGGGCGCTGCCGGGCTCGTGCCGGGGCGACGACGGCTGCTGCCAG

OsWAKs-Supplemental Data 1[1].txt

AGCAACATCCCGCTCGGGCTCGCCTCCTACCGGCCGCGCCTCCGCAGCTTCGGCCGCGCG  
CAGGGCGGCGCCTTCCTTGCCAACGCCACCGCCTGCGCCTACGCTTTCATGGTGGACGCA  
TGGTGGTTCTGGTACGCCGGCTCAAACCTTCAACCGGACGGGCGACTTCGCCGTGCCCGTC  
GTGCTGGACTGGGCCATCCGGCCGGACGCCGGGAGCGGGAGCGGGAGCGGGAGCTGCGCC  
GCCGCAAGCCGCACGCCGCTGCCGTCGTACGCCTGCCGGAGCGCGCACAGCGTCTGCATC  
GACTCCAGCAACGGCCCTGGGTATATCTGCAACTGCACCGCCGGGTACCACGGCAACCCG  
TACGTCGTGGCGACTGCACAGACATCAACGAGTGCGAGCACAAAGATGAGTACCCCTGC  
TACGGCGTCTGCACCAATACGGCAGGCAGCTACGCTTGCTCTTGCCCCAAGGGATCCAGT  
GGAAATGCCAGCGTGGAGGGTGGCTGCCGCCGACGACAAGTTCACTCTAGCACTCAAG  
ACGGTCACAGGAAATATCACCTTCTACACTAGTCGTAATAATTTGAGTTTGAGAAAGCA  
GTGACAGATAAGCCAGCAGCTTAG

>OsWAK116, 6649.t00001, Chromosome 11, pre-processing  
ATGGAAGTTCCAGAAAGTAAGCTTGGGGATTTTCATCCAAGGCGATGACAGGGCAAAGTGG  
ATAGCGGACAGCAATCACAATATCACAAAATTCACAGAAGATGAGATTAAGAGAATTACT  
GACAACCTATAGTACTGTTATTGGAAAAGGTGGATTTGGACAAGTTTACAAAGGAGTTCTT  
GATGATAACCGTGTAGTCGCAGTGAAGAGATACATATTTGAGGATTCCATGGAAGACTTA  
GCTAAAGAAGTAATCGCCACAGCCAAGTCAACCATAAAAAATGTGGTTAGGCTTGTAGGT  
TATAGCATAGAGCAAAAATATGCTCTAATGGTGGTCACAGAGTATGTATCCAAGGGAGC  
CTGCATGACATCCTTTCATCAAAGTGATACTCCCATATCTTTGGACACAAGATTGTGTATT  
GCTATACAGTGTGCAGAAGCATTAGGCTATATGCATTCTTCAATGTATACCCCTATTGTT  
CATGGGGATATCAAGCCTTCAAATATACTACTGGATGACAATCTTGATGCAAAAATATCA  
GATTTTGGAAATATCAAGGTTTCTCTACGGAGGTAACCTCGGCACACTAAAAATGTAAAA  
GGGAGCATAGATTACATGGATCCTATACTATTTAGAGACGGGACACAATCGTCGAAGAAC  
GATGTTTATAGTTTTGGAGCAGTTCTACTAGAATTAATTACTAGAAAGAGGATAAAAGAG  
GAAGGAAAAGTTAGCCTCATTACAAGTTTACCGAACATGATTGAGAAGGAAAACGGATG  
AAGGATCTTTTTGATGCAAATATAGCATCCGTCAGTAACATGAAGATTATCAATCAAATA  
GGAAAATTAGCAACAAAGTGCCTAGCAATGGACATGAAGAAACGTCCAAAGATGAACATT  
GTGGCTGAACACCTTCGGAAGCTTAGAGAATATCGCAATGGAGGACATGATAATACAACC  
CTTTGGCGATCCTTCTCGGTAACACAAGATTTGTTTAAAAAATACAAGCAAAGCACAAGG  
AATGCCAGCTATGGTTTCGACCAAGCACCTAAGAAGAAGAAGAAGAAGAGTTTCGCCATT  
TTCAAACATAATAGTGGCAATTCTAAGTTACTGAAAAGCTTGGTGCTGTAAGAATTTTC  
ACAAAGAAAGAAGTAAAGAAATTTACAATGGATTATTCCTGTTTACTTCTTAAAGACGGT  
TTAGCAGAGTACCACAGAGGAATTTCTGAGGACAATACGTTGGTCACAGTAAAGACGCCT  
TATGATGGAGATGAGAGCCTTCAAAAATTGTTTTCTCATGGAATGATGATCTGGTCTCA  
CATCTCCCACAAGAACATGGTCAAACCTGTTGGGCTGTTGCTTGAGGCTAA

>OsWAK116, 6649.t00001, Chromosome 11, post-processing  
ATGGAAGTTCCAGAAAGTAAGCTTGGGGATTTTCATCCAAGGCGATGACAGGGCAAAGTGG  
ATAGCGGACAGCAATCACAATATCACAAAATTCACAGAAGATGAGATTAAGAGAATTACT  
GACAACCTATAGTACTGTTATTGGAAAAGGTGGATTTGGACAAGTTTACAAAGGAGTTCTT  
GATGATAACCGTGTAGTCGCAGTGAAGAGATACATATTTGAGGATTCCATGGAAGACTTA  
GCTAAAGAAGTAATCGCCACAGCCAAGTCAACCATAAAAAATGTGGTTAGGCTTGTAGGT  
TATAGCATAGAGCAAAAATATGCTCTAATGGTGGTCACAGAGTATGTATCCAAGGGAGC  
CTGCATGACATCCTTTCATCAAAGTGATACTCCCATATCTTTGGACACAAGATTGTGTATT  
GCTATACAGTGTGCAGAAGCATTAGGCTATATGCATTCTTCAATGTATACCCCTATTGTT  
CATGGGGATATCAAGCCTTCAAATATACTACTGGATGACAATCTTGATGCAAAAATATCA  
GATTTTGGAAATATCAAGGTTTCTCTACGGAGGTAACCTCGGCACACTAAAAATGTAAAA  
GGGAGCATAGATTACATGGATCCTATACTATTTAGAGACGGGACACAATCGTCGAAGAAC  
GATGTTTATAGTTTTGGAGCAGTTCTACTAGAATTAATTACTAGAAAGAGGATAAAAGAG  
GAAGGAAAAGTTAGCCTCATTACAAGTTTACCGAACATGATTGAGAAGGAAAACGGATG  
AAGGATCTTTTTGATGCAAATATAGCATCCGTCAGTAACATGAAGATTATCAATCAAATA  
GGAAAATTAGCAACAAAGTGCCTAGCAATGGACATGAAGAAACGTCCAAAGATGAACATT  
GTGGCTGAACACCTTCGGAAGCTTAGAGAATATCGCAATGGAGGACATGATAATACAACC  
CTTTGGCGATCCTTCTCGGTAACACAAGATTTGTTTAAAAAATACAAGCAAAGCACAAGG  
AATGCCAGCTATGGTTTCGACCAAGCACCTAAGAAGAAGAAGAAGAAGAGTTTCGCCATT  
TTCAAACATAATAGTGGCAATTCTAAGTTACTGAAAAGCTTGGTGCTGTAAGAATTTTC  
ACAAAGAAAGAAGTAAAGAAATTTACAATGGATTATTCCTGTTTACTTCTTAAAGACGGT  
TTAGCAGAGTACCACAGAGGAATTTCTGAGGACAATACGTTGGTCACAGTAAAGACGCCT  
TATGATGGAGATGAGAGCCTTCAAAAATTGTTTTCTCATGGAATGATGATCTGGTCTCA  
CATCTCCCACAAGAACATGGTCAAACCTGTTGGGCTGTTGCTTGAGGCTAA

OsWAKs-Supplemental Data 1[1].txt

>OsWAK117, 6649.t00010, Chromosome 11, pre-processing  
 ATGGAACCTTCTACAAGAGAAGAACATACATGTCAGCCAAAGGGATGACAAGGCAAAGTGG  
 ATAATTGATAACTATAGTAATATTAGGAGTTTCACAGAACATGACATTGAGAAAATCACT  
 AGCAACTATAGCACTCTAATTGGAAAGGGTGGATTTGGAGAAGTATTTAGAGGGGTTCTT  
 GATGATGAAGATGACGTAGTTGCCGTGAAGAGATATATCCGTGGAGATTTAAGAGAAGAG  
 TTCATGGAAGAGATAAGAATCCATGCTCAAATGAGCCATAAGAATATAGTGAAACTTATA  
 GGCTGCTGTATAGGAAAAAATAGACTGATGATGGTAACTGAGTTTATCTCAAATGGGAAT  
 CTTGAAGATGCACTTCACAACAGTGATATTTTCATCCCTTTGAGTACACGCTTGGGCATT  
 GCAATGGGATGTGCAAAAGCATTGAGCTACATGCATTGATGCATTTATCAAGTAGCAGC  
 CTTATATGTCATGGCGATATTAAGCCTGCAAACATTCTTCTTGATGCCAATCTTACAGCA  
 AAAGTTTCAGATTTTGAATCTCAAAGTCTCTCTCAGGAGGCATCACCCGATGGACTTCT  
 AATGTTAAAGGAAGTATAGCTTACATGGATCCTATATATTATAGAGAAGGCCGTGTTACC  
 TCGAAGAGTGATGTCTATAGCTTTGGAGCTGTTCTGTTAGAAGTTATAGCTCGAAAAAGC  
 ATGAAAGAAGGGGGCATAAGTTGCGAAGCTTTCCGTCAAGCTTGTGCAAAGGGAAAAGGA  
 CTGAGGGAACTGTTGGATATAGAAATAGCAGAAGAATGCAATATGAATATTCTTGAAGAA  
 ATTGCAAAATTGGCAACTAAGTGCATGATAGTCGACAATATTAACAAACGTCCTCAAATG  
 AATGATGTGGCTGAACACCTTCGGACTTGGATTTTTCAAGTCCGGAATGGTGGACATGAA  
 AAACCAGCTTGGGAATCCACTTTGGATAAAGTACATGATGCATTGAAGAAAGGTATGCAA  
 AGCGCCGGCATTTCAGCTCTAGTATAATTTCAAATCCTCAGAAGCACAATTTTGGTATT  
 TTCAGGAGTAATGATGTTAGAAATTTTCAAAAGAAAGATATCAGTGTGATCACAATAAC  
 TCCTCTCATCTTCTTGGTAAAAGTACATTTTGTAAATGTCTATAAAGGAATACTAGATGAC  
 AATACGTTGGTGGCAGTGAAAAGTTTCTGTGTTTTCTTATGATGAGGATCTAAGAAAC  
 AGTATTAGCACTAGCATAACCATCATGTCTAAAATCGCCACAGGTACATCATCAACTT  
 TTGGGTCAATTGTTCCGATGCTGATCATCTTCTTCTATATATGAGTATGCTGCTAAA  
 GGGAGCCTCAATGACATTCTGTACTCTAAGAAGATTTCCCACTAGAGTTACGTCTGAAG  
 ATTGCAGTAAAACTGCAGAAGCATTAGAATTCCTTCACTCCTCAGCATTTTGTGTCATC  
 CGACATGGTAATATCAAGCCAAGCAATATACTTCTTGACAGTAAGTTAATGCCAAAGGTT  
 GCAGGTTTTACTTCATCAAGGAGGATTGCTGAAAACAACAATGATCAGGTGCGCTCTATG  
 GAATTCACGCATATACACTACATGGACCCGATTCAATTCAGTCTGGGCATTTACGGTA  
 AAAAACGATGTGTACAGCTTCGGTGTGCTTCTTTGAACTCATCAGCAGGAAGAAACCT  
 GTATATCATTGTCATGACAACAATCGTCGACTCATCCCTGAATTCATCAGAGCTTACGAG  
 ACAGCCAAGAGTGGGAAGGCAATGTTTGTGAAGGGATCATGGCTGAAGAAGATATCGCT  
 GTCTTGAAGAGATTGGGAGGCTGGCAATGGAGTGCCTCAGCTTGGAAATCGACGGAAGG  
 CCGACGATGAAGGAAGTGGCTGAACGCCTTAAGATGATCAGGAGAATGAAGGAGAGCTCA  
 GCCATGGGAGCAGCGAGATGCTAA

>OSWAK117 gi |32988062|dbj |AK102853.1| Oryza sativa (japonica cultivar-group)

cDNA clone: J033110K06, full insert sequence  
 GACCGACGACGAGTGCAGCGGCGAGGGGAGGACCGCTCCGGCGAGCGGCGACGAGGGGAGGACACGCGCAT  
 GCGCGCGCTCGACGCCAGCAAGCGGCAAGCGGCGGGCGTGTCTGTCCATCTTCCCCATCGTCCATCGTCG  
 TCCCGGTGCGCCGCGCCCTCGCCCCGCGACCACCGCTGGCGACCACAGCCGCCAGTCAGTTCATCAAC  
 ATCTTCAAATAGTAGTTTTTTTTTAAGATAACAGTGAGATTTTTATTGTTGGCAAACAATGGAAGTTCTA  
 CAAGAGAAGAACATACATGTCAGCCAAAGGGATGACAAGGCAAAGTGGATAATTGATAACTATAGTAATA  
 TTAGGAGTTTACAGAACATGACATTGAGAAAATCACTAGCAACTATAGCACTCTAATTGGAAAGGGTGG  
 ATTTGGAGAAGTATTTAGAGGGTCTTGTATGATGAAGATGACGTAGTTGCCGTGAAGAGATATATCCGT  
 GGAGATTTAAGAGAAGAGTTTATGGAAGAGATAAGAATCCATGCTCAAATGAGCCATAAGAATATAGTGA  
 AACTTATAGGCTGCTGTATAGGAAAAAATAGACTGATGATGGTAACTGAGTTTATCTCAAATGGGAATCT  
 TGAAGATGCACTTCACAACAGTGATATTTTCATCCCTTTGAGTACACGCTTGGGCATTGCAATGGGATGT  
 GCAAAAGCATTGAGCTACATGCATTGATGCATTTATCAAGTAGCAGCCTTATATGTCATGGCGATATTA  
 AGCTGCAAAACATTCTTCTTGATGCCAATCTTACAGCAAAAAGTTTCAGATTTTGAATCTCAAAGTCTCT  
 CTCAGGAGGCATCACCCGATGGACTTCTAATGTTAAAGGAAGTATAGCTTACATGGATCCTATATATTAT  
 AGAGAAGGCCGTGTTACCTCGAAGAGTGATGTCTATAGCTTTGGAGCTGTTCTGTTAGAAGTTATAGCTC  
 GAAAAAGCATGAAAGAAGGGGGCATAAGTTGCGAAGCTTTCCGTCAAGCTTGTGCAAAGGGAAAAGGACT  
 GAGGGAAGCTGTTGGATATAGAAATAGCAGAAGAATGCAATATGAATATTCTTGAAGAAATTGCAAAATTG  
 GCAACTAAGTGCATGATAGTCGACAATATTAACAAACGTCCTCAAATGAATGATGTGGCTGAACACCTTC  
 GGAGTTGGATTTTTCAAGTCCGGAATGGTGGACATGAAAAACAGCTTGGGAATCCACTTTGGATAAAGT  
 ACATGATGCATTGAAGAAAGGTACATCATCAAACTTTTGGGTCAATTGTTCCGATGCTGATCATCTTCTTA  
 TTCTCATATATGAGTATGCTGCTAAAGGGAGCCTCAATGACATTCTGTACTCTAAGAAGATTTCCCACT  
 AGAGTTACGTCTGAAGATTGCAGTAAAACTGCAGAAGCATTAGAATTCCTTCACTCCTCAGCATTTTGT  
 GTCATCCGACATGGTAATATCAAGCCAAGCAATATACTTCTTGACAGTAAGTTAATGCCAAAGGTTGCAG  
 GTTTTACTTTCATCAAGGAGGATTGCTGAAAACAACAATGATCAGGTGCGCTCTATGGAATTCACGCATAT  
 ACACATGACGACCCAGTTCATATTTCAGTCTGGGCAATTTACGTTAAAAACAGATGTGTACAGCTTCGGT  
 GTCGTTCTCTTTGAACTCATCAGCAGGAAGAAACCTGTATATCATTGTCATGACAACAATCGTCGACTCA



# OSWAKs-Supplemental Data 1[1].txt

TCCCTGAATTCATCAGAGCTTACGAGACAGCCAAGAGTGGGAAGGCAATGTTTGATGAAGGGATCATGGC  
TGAAGAAGATATCGCTGTCCTTGAAGAGATTGGGAGGCTGGCAATGGAGTGCCTCAGCTTGGAAATCGAC  
GGAAGGCCGACGATGAAGGAAGTGGCTGAACGCCTTAAGATGATCAGGAGAATGAAGGAGAGCTCAGCCA  
TGGGAGCAGCGAGATGCTAACTGAAGCAGAAGCTATAGAAGGCTGTTGGCATCGCTGAAACCGAAGATGA  
AGCCAACTGATGGGCCACAAGTATTGTTCCCTTTTCACTCTTTCACCTGAGAGATCGTTTACAGAGTATC  
ATCAGAAACATAGTGTGTACTGTTTGGTTGTTAACTGTGTTATATAACATACTGTATTCTCTATTGGCAG  
TTTGTCCACATATATATAAGACTATATGGACTATTTTTGGTTGTTGGTTTTGTAAGCCGTTGTCGTATTG  
TTTTGTCTGTTGTCATC

>OSWAK118, 6649.t00014, Chromosome 11, pre-processing  
ATGGAACCTTCCTGAAGACACGATTATGACAGGAGATCATAGTCAATGGGATGATAATAGT  
AATATTAGGAGTTTTACAAAACATGATATTGAGAGAATTACGGGCAACTATAGCATTCCC  
ATTGGAAGGCGGGTTCGGAGAAGTCTTTAAAGGATTCAATTGATGATTATGACCGTGAT  
GTAGTTGCGGTGAAGAGATATATCCATACCGATTTGAGAAAGGAGTTCATGGAAGAAGTA  
AGCATTATAGTAAAATCAACCATAAGAATGTAGTGAAGTTTATAGGTTATAGTACAGGG  
GAAAACACCCTAATGTTGGTAACTGAGTTTATCTCCAATGGGAACCTTGAAGATGCACTT  
CACAAGAGTGATATTTCCATCTCTTTGGATACAAGATTGGGCATTGCTATCGGGTGCGCA  
GAAGCATTGAGCTACATGCATTGATGCATTATCAGTTGATCTTGACAGCCTTGTATAT  
CATGGTGATATTAAGCCAGCAAACATACTTCTAAATGATAGTCTTACAGCAAAAGTATCT  
AATTTTGGACTGTCAAGGCATCTCTCTGGAGGCATTACTCGATGTACAAATACTGTAAAA  
GTATGGATTACATGGATCCTATATATCTTCACTGGGCGGATTACCTGAAAGAGTGATG  
TCTATAGTTTTGGGATAG

>OSWAK118, 6649.t00014, Chromosome 11, post-processing  
ATGGAACCTTCCTGAAGACACGATTATGACAGGAGATCATAGTCAATGGGATGATAATAGT  
AATATTAGGAGTTTTACAAAACATGATATTGAGAGAATTACGGGCAACTATAGCATTCCC  
ATTGGAAGGCGGGTTCGGAGAAGTCTTTAAAGGATTCAATTGATGATTATGACCGTGAT  
GTAGTTGCGGTGAAGAGATATATCCATACCGATTTGAGAAAGGAGTTCATGGAAGAAGTA  
AGCATTATAGTAAAATCAACCATAAGAATGTAGTGAAGTTTATAGGTTATAGTACAGGG  
GAAAACACCCTAATGTTGGTAACTGAGTTTATCTCCAATGGGAACCTTGAAGATGCACTT  
CACAAGAGTGATATTTCCATCTCTTTGGATACAAGATTGGGCATTGCTATCGGGTGCGCA  
GAAGCATTGAGCTACATGCATTGATGCATTATCAGTTGATCTTGACAGCCTTGTATAT  
CATGGTGATATTAAGCCAGCAAACATACTTCTAAATGATAGTCTTACAGCAAAAGTATCT  
AATTTTGGACTGTCAAGGCATCTCTCTGGAGGCATTACTCGATGTACAAATACTGTAAAA  
GTATGGATTACATGGATCCTATATATCTTCACTGGGCGGATTACCTGAAAGAGTGATG  
TCTATAGTTTTGGGATAG

>OSWAK119, 6649.t00017, Chromosome 11, pre-processing  
ATGAGGAAAGTCCACGATAATAATAATGTTCCGATATTCACAGAAGATGAAATAAAAAGA  
ATTACAAAAAATATAGAACTCTCATTGGAAGGTTGGATTTGGAGAAGTCTTTAGCGGT  
GACCTTGATGATGATGATGGTCAAGTTGCGGTAAAGAGATATATCCGTGGGGATTTAAGA  
GAAGAGTTCATGGAAGAGGTTAGAATCCATGCCCAAATGAGCCATAAGAATATAGTGAAA  
CTTATAGGCTATTGTATTGGAGAAAACACTCTAATGATGGTAACTGAGTTTATCTTGAAT  
GGTAGCTATTGAAGATGTACTTTGCAACAGGGGAAATTTCCATCCCTTTGAATACAGCCTTG  
GGCATTGCTGTAGGGTGTGCAGAAGCATTGAGCTACATGCATTTATCAAGTGACAGCCTT  
GTATATCATGGTGATATTAAGCCTGGAAACATTCTTCTAGATGCCAATCTTACTGCCAAA  
GTTTCCGATTTTGGCATCTCAAAATCTCTTTCTGGAGGCCTCACTCGATATACTTTACAT  
ATTATGGGGTGTGAAGATTACGTGGACCCTTTATATGTCAGAGATGGCCGTCTTACCCCA  
AAGAGTGATGTTTATAGCTTTGGGATAGTTCTTTTGAAGTCAAGCTCGAAAAAGAGTA  
AAACAGGACGGCGTTAACTTAATTATATCCTTTGGTCAAGCTTGTGCAACGGAAAAAGG  
CTGAGGGAATGTTGATGCAGAAATAGTAGAGGAGTGCAATATGAATGTTCTTGAAGAA  
ATAGCAAAATTGGCAATTGAATGTCTGACATTGGACATTGAAGAACGCCCTAAAATTAAT  
GATGTGGCTCAACGCCTTCGGACCCTTCAAACCTCATAGGGAGGGGAGGAAAGTGCAGCT  
CGGAAATCTTCTCCTCAGCAATGCTGAACGCATTAAGGAAAGGGTACAAGCAAAGCACA  
AGCATTTTCAAGCTTACTCTACGCGCAACCATAGGCGGAATGCCATTTTCGAAATAAAAA  
TCTGAGATGGCTAAACAACACAATTTTAGAAGTTTCAAAAAGGAGAATCTATTTGAAGTC  
ATGGGGCGTTACAAATCTCCTCTTGGTGACAAAGGGTCTGGCATTGGTAGGTACAATAAA  
GGAACACTAGAGGACAATATGTTGGTGGTAGTGAAGAGTCACTTTTCAAGTGGAGATGTC  
TTCATGATTTTTTATGAAGCATCCATTGTGTCCAGATCGTTTACAGAGGGCATCATAAAA  
CTTTTGGGGTATTGCTTTGATGCTGATTTTCCCATGCTAGTATATGAGTATGTTGATCGA  
GGGAGCTATACGACATTCTGAATAGTGCACAAGATATCCCACTAGGGTTACGCCTGAAG  
ATCACGGTAAAGACTGCAGAAGCATTAGATCACCTTCACTCGTACCATTCTGTGTGAGA

OsWAKs-Supplemental Data 1[1].txt

CACGGTGATGTCAGGTCGACCAACATACTCTTAGACAAAAACCTAATGCCAAAAATCTCA  
GGTTTTACATCATCAAGAAGGCTTACCAAGGGCAATTTGTCTTTTGATAACGTTGAAAAG  
TACTGTGATCTTATGCCAAAAAATAATAAGGGATGATCCGAGCTACATCGACCCAAAA  
TTTCTACAGTCTGATGTCCTGACAACCTGAAAGCGATGTCTACGGTTTTGGTATTATTTTG  
CTAGAACTCATTAGCAGGAAGAACTTTTTATACCAGGACAAGAAACACTGCCCGGTTTCGC  
CTCATCCCTGAATTCATCAAAGCTTATAAAACAGAAGGTAGTGGGAATGCAATGTTTGAT  
AAAGGAATTACAGCCAAAAAAGATATCGTGGTTCTTGAAAACATCGGGAGGTTGGCACTG  
AGGTGCCTTAGCATGGAATAAGGCCGACAATGAAGGATGTGGCTGAACAACCTGGGATG  
ATCCGAAGGGCTTGGAACAGCATGCACCACAGGGGCATGGATGCACAGGCTGTTGGCAT  
CTATGA

>OSWAK119, 6649.t00017, Chromosome 11, post-processing  
ATGAGGAAAGTCCACGATAATAATAATGTTCCGATATTCACAGAAGATGAAATAAAAAGA  
ATTACAAAAAATATAGAATCTCATTGGAAAAGGTGGATTTGGAGAAGTCTTTAGCGGT  
GACCTTGATGATGATGATGGTCAAGTTGCGGTAAAGAGATATATCCGTGGGGATTTAAGA  
GAAGAGTTCATGGAAGAGGTTAGAATCCATGCCCAAATGAGCCATAAGAATATAGTGAAA  
CTTATAGGCTATTGTATTGGAGAAAACACTCTAATGATGGTAACTGAGTTTATCTTGAAT  
GGTAGCCTTGAAGATGTACTTTGCAACAGGGAAATTTCCATCCCTTTGAATACACGCTTG  
GGCATTGCTGTAGGGTGTGAGAAGCATTGAGCTACATGCATTTATCAAGTGACAGCCTT  
GTATATCATGGTGATATTAAGCCTGGAACATTTCTTAGATGCCAATCTTACTGCCAAA  
GTTTCCGATTTTGGCATCTCAAAATCTCTTTCTGGAGGCCCTCACTCGATATACTTTACAT  
ATTATGGGGTGTGAAGATTACGTGGACCCTTTATATGTCAGAGATGGCCGTCTTACCCCA  
AAGAGTGATGTTTATAGCTTTGGGATAGTTCTTTTGGAACTCATAGCTCGAAAAAGAGTA  
AAACAGGACGGCGTTAACTTAATTATATCCTTTGGTCAAGCTTGTGCAAACGGAAAAGGG  
CTGAGGGAATGTTTCGATGCAGAAATAGTAGAGGAGTGCAATATGAATGTTCTTGAAGAA  
ATAGCAAAATTTGGCAATTGAATGTCTGACATTGGACATTGAAGAACGCCCTAAAATTAAT  
GATGTGGCTCAACGCCTTCGGACCCTTCAAACCTCATAGGGAGGGGCAGGAAAGTGACGCT  
CGGAAATCTTCTCCTCACGAATGCTGAACGCATTAAGGAAAGGGTACAAGCAAAGCACA  
AGCATTTTTCAGCTCTACTCCTACGGCCAACCATAGGCGGAATGCCATTTTCGGAAATAAAA  
TCTGAGATGGCTAAACAACACAATTTTAGAAGTTTCACAAAGGAGAATCTATTTGAAGTC  
ATGGGGCGTTACAAATCTCCTCTTGGTGACAAAGGGTCTGGCATTGGTAGGTACAATAAA  
GGAACACTAGAGGACAATATGTTGGTGTAGTGAAAAGTCACCTTTTCAGATGAGGATGTC  
TTCATGATTTTTATGAAGCATCCATTGTGTCCAGATCGTTACAGAGGCATCATAAAA  
CTTTTGGGGTATTGCTTTGATGCTGATTTTCCCATGCTAGTATATGAGTATGTTGATCGA  
GGGAGTCTATACGACATTCTGAATAGTGCACAAGATATCCCACTAGGGTTACGCCTGAAG  
ATCACGGTAAAGACTGCAGAAGCATTAGATCACCTTCACTCGTCACCATTCTGTGTGAGA  
CACGGTGATGTCAGGTCGACCAACATACTCTTAGACAAAAACCTAATGCCAAAAATCTCA  
GGTTTTACATCATCAAGAAGGCTTACCAAGGGCAATTTGTCTTTTGATAACGTTGAAAAG  
TACTGTGATCTTATGCCAAAAAATAATAAGGGATGATCCGAGCTACATCGACCCAAAA  
TTTCTACAGTCTGATGTCCTGACAACCTGAAAGCGATGTCTACGGTTTTGGTATTATTTTG  
CTAGAACTCATTAGCAGGAAGAACTTTTTATACCAGGACAAGAAACACTGCCCGGTTTCGC  
CTCATCCCTGAATTCATCAAAGCTTATAAAACAGAAGGTAGTGGGAATGCAATGTTTGAT  
AAAGGAATTACAGCCAAAAAAGATATCGTGGTTCTTGAAAACATCGGGAGGTTGGCACTG  
AGGTGCCTTAGCATGGAATAAGGCCGACAATGAAGGATGTGGCTGAACAACCTGGGATG  
ATCCGAAGGGCTTGGAACAGCATGCACCACAGGGGCATGGATGCACAGGCTGTTGGCAT  
CTATGA

>OsWAK120 9639.t03169, Chromosome 11, pre-processing  
ATGCCGTATCCTTTTGGCACCATAGATGGCTGCTTCCGGGGACCACCTTCCGCGTCTAC  
TGCGAAGACGACCATTGCGGTTTATCTCCAGGAGCACAAGAAGTTGAAGGTCTTGCGATT  
GAGCTGGCCAGGGCGAGGTTCTCATCCAGAAGCGCATAGCAACAAGCTGCGGCGTCAAC  
CTCACCGGTAAAGCGCTCGGCATTCCATGGGTAGTGCACGATGGTGGCTTAGCAGATGAC  
TATCCCTATCTGACAATCTCTACCAAGAACCAGTTTGCAGTAGTCGGGTGTGGTATCACA  
GCGATCATCGTTGGTCAGGGAGAGAACCAGCCTGATTACACGGTCCGATGCCGATCATTC  
TGTGATGATGTCGATAGCAATATTGTGGAAGATAATAGCACGCAATGCAATGGCAACACG  
GGCTGCTGCCAGGCTTCCATCCAGGTAATCTCAAGGCTTTCCAGCCCTCATTCTTAAAA  
ATAAGCGGTGTGAATACTCCGGCGTCCCGTGTGTCTACGCTTTCTGCTGAGGAGCAGAAC  
TGGTTCAAATTCAGACCTCATATGCCAAATCGATGGAACCTTTATTCAAAGTATCGAAAT  
AAGGGCACCGGGGTTCTCTAGTGCTCGACTTGGTTGTTGGTAACGAAACGTGTGACGAA  
GCCAAAAGGAACGCATTATCCTATGCGTGCAAGGCTACGAACAGCTCTTGCATCGACAGA  
CCTAGCCGCTCAGGATACCTTTGCAACTGCTCTCAAGGTTATGAAGGAAATCCCTACCTA  
CATGGAGCTGCCAAGGTGAGAATGCTCTCAAAAAATTTCCATGCCCCCTTTTCTTGCAA  
CTAGAAACATACAAATTGACACCACTTCTTTTTAATTCCTGGCCCAACATCGTTTGATG

OsWAKs-Supplemental Data 1[1].txt

GACAGACATCAATGAGTGCATTATCCATGGTTGTATCCTTGCAAAGGTAAGTGTCTGTAA  
CAAGATTGGAACTATGCGTGTTCGTGCCCATCTGGAAGTCTAGAGCAAAGATCCCAAGAT  
CATACCTTGCCTCAACCATAGGTATATATATAATATTCACTAGCTTTTTTGAATAATA  
TTTTTGCACAAGTCATGTTTGGGGAAGTAACAACTATTTTCATGGGAACTTTTTTTTA  
TTAAAAGTGGTAAACAAATATCTATATATATATACTTTTCAGGTTTAAAGCATTGGTATA  
GGAGTTGGTAGCGCAACAGGCTTTATTTGCATTGTTCTCATTGCAATGTTCTTACCAGA  
CGGATAAAGCACAGGAGGAAAAATAAAGCTAAGACAAAAGTTCTTCATTCTGAATCGTGGA  
CAACTGCTTAAACAATTGGTATCCCAAAGGGCAGATATTGCTGAAAGAATGATCATCACA  
TTAGATGAGCTTGAAAAGGCAACTAACAACCTTTGACAAAAGCTCGTGAGCTTGGAGGTGGA  
GGGCATGGCACTGTTTATAAAGGGATTCTATCAGACCTACATGTGGTAGCCATCAAGATA  
TCAAATATAGTGGTCCCGAAAGAAATAGATGATTTTATAAATGAGGTTGCCATCCTCTCA  
CAAATCAACCATAAAAAATGTAGTAAACTAATTGGCTGTTGTCTAGAGACTGAAGTTCCA  
TTGTTAGTTTATGAATTTATTTCCAATGGAACCTGTATCACCATCTTCATGGTGAGGGT  
CCAAGGTGCTATCATGGAGCAATAGGTTGAGGATCGCAGCCGAAATTGCAAATGCTCTT  
TCCTATCTTCACTCATCAGTTACAATCCCAATAATCCATAGAGATATAAAGTCCAGTAAC  
ATACTTCTTGATGATAATCTGACATCAAAGGTATCGGACTTTGGAGCTTCAAGGTATATC  
CCAATCGAGAAAACAGCACTAACAACAGCAGTTCAAGGTACTGTAGGATATTTGGATCCT  
ATGTACTTTTACACGGGTGCTCTCAATGATAAAAGTGATGTCTATAGCTTTGGTGTTATG  
CTAGTGGAATTGCTCACCTAG

>OsWak120 9639. t03169, Chromosome 11, post-processing  
ATGCCGTATCCTTTTGGCACCATAGATGGCTGCTTCCGGGGACCACCCTTCCGCGTCTAC  
TGCGAAGACGACCATGCGGTTTATCTCCAGGAGCACAAGAAGTTGAAGGTCTTGCGATT  
GAGCTGGCCAGGGCGAGGTTCTCATCCAGAAGCGCATAGCAACAAGCTGCGGCGTCAAC  
CTCACCGGTAAAGCCGTGCGCATTCCATGGGTAGTGCACGATGGTGGCTTAGCAGATGAC  
TATCCCTATCTGCAATCTCTACCAAGAACCAGTTTGCAGTAGTGGGTGTGGTATCACA  
GCGATCATCGTTGGTCAGGGAGAGAACCAGCTGATTACACGGTCGGATGCCGATCATT  
TGTGATGATGTCGATAGCAATATTGTGAAGATAATAGCACGCAATGCAATGGCAACACG  
GGCTGCTGCCAGGCTTCCATCCCAGGTAATCTCAAGGCTTTCCAGCCCTCATTCTTAAAA  
ATAAGCGGTGTGAAGTACTCCGGCGTCCCGTGTGTCTACGCTTTTCGTCGTGGAGCAGAAC  
TGGTTCAAATTCAGACCTCATATGCCAAATCGATGGAACCTTTATTCAAAGTATCGAAAT  
AAGGGCACCGGGGTTCTCTAGTGTCTGACTTGGTTGTTGGTAACGAAACGTGTGACGAA  
GCCAAAAGGAACGCATTATCTATGCGTGAAGGCTACGAACAGCTCTTGATCGACAGA  
CCTAGCCGCTCAGGGTACCTTTGCAACTGCTCTCAAGGTTATGAAGGAAATCCCTACCTA  
CATGGAGGCTGCCAAGACATCAATGAGTGCATTATCCATGGTTGTATCCTTGCAAAGGT  
TTAAGCATTGGTATAGGAGTTGGTAGCGCAACAGGCTTTATTTGCATTGTTCTCATTGCA  
ATGTTCTTACCAGACGGATAAAGCACAGGAGGAAAAATAAAGCTAAGACAAAAGTTCTTC  
ATTTCTGAATCGTGGCAACTGCTTAAACAATTGGTATCCCAAAGGGCAGATATTGCTGAA  
AGAATGATCATCATTAGATGAGCTTGAAAAGGCAACTAACAACCTTTGACAAAAGCTCGT  
GAGCTTGGAGGTGGAGGGCATGGCACTGTTTATAAAGGGATTCTATCAGACCTACATGTG  
GTAGCCATCAAGATATCAAATATAGTGGTCCCGAAAGAAATAGATGATTTTATAAATGAG  
GTTGCCATCCTCTCACAATCAACCATAAAAAATGTAGTAAACTAATTGGCTGTTGTCTA  
GAGACTGAAGTTCCATTGTTAGTTTATGAATTTATTTCCAATGGAACCTGTATCACCAT  
CTTCATGGTGAAGGTCCAAGGTGCTATCATGGAGCAATAGGTTGAGGATCGCAGCCGAA  
ATTGCAAATGCTCTTTCTTCTTCACTCATCAGTTACAATCCCAATAATCCATAGAGAT  
ATAAAGTCCAGTAACATACTTCTTGATGATAATCTGACATCAAAGGTATCGGACTTTGGA  
GCTTCAAGGTATATCCCAATCGAGAAAACAGCACTAACAACAGCAGTTCAAGGTACTGTA  
GGATATTTGGATCCTATGTACTTTTACACGGGTGCTCTCAATGATAAAAGTGATGTCTAT  
AGCTTTGGTGTTATGCTAGTGGAATTGCTCACCTAG

>OsWak121 9639. t04303, Chromosome 11, pre-processing  
ATGGCAACAAATAAGCGAGTAGTGGAGCTGGAGCGCTGCATGTTGATTGGCGTCTGTCTG  
CTTCTGCTATGCCTCCTGCACACCGCTGAGGCGCAGTTGATGCAGCATCCGCCGGCGGAT  
TGCCCAGAAACGTGCGGCAATATAGCTATCCCTACCCATTTGGCATTGGCAACAATTGT  
TCCTTGCTAGGGCCGGCAGGCGACGACTTCACCGTCGTATGCAATGATAGCTACAACCCA  
CCAAGGCCCTTCAGGGGTGACTATGAGATCACCAGTATCGTGCTGGAGGAAGGCGTGTTG  
AACGCCAGCTACACAGCCGTGCCGTATATCTGCTATAGCTCGCCCAACACCTCCCAACAA  
TTCACCATGTCATTGACCTCGCCGGCTCGCCTTTCTCATCTCGACGACAGGCAACAAG  
TTCACGGCCATCGGCTGCAACACCCTGGCGATGATTATAGGCAAGGAAGATATGACCTAC  
TTTACCGGCTGCATCTCCTACTGCGGTGGGGATGTACAAAAGGCCGACCCGATGGCTCG  
CCGTGCGAGTGGCTGCGTCTGCCAGACTGAATCACGCCGGAGCTCAGCTTCTTGAAC  
GTACCTGGGAGTGCATGGCCACAACGACACTACAATAGTGCCTGGGATTACAGCCCC  
TGCAGCTACGCCTTCATAGCCGATAAAAACTGGTATACATGATGCTCATTATTAATTAA

[illegible]

OsWAKs-Supplemental Data 1[1].txt

AGCAAGTTGCGGTGAAGCGCTCCATTGCAGTTGATGATGAGGCACGCAAAAAGGATTTTG  
CTAATGAGGTTACAATTCAATCTCAAATCAATCATAAGAACGTGGTTAGACTTGTGGGTT  
GTTGTTTGGAGACAAATGTCCCAATGCTGGTCTCCGCGTACATACCAAAAGGAAGCCTGC  
ACGATGTGCTTCATGGTAATGGCAATCACGTTGCAAAATATAATCTCACATTACAAGTAC  
GTCTAGAAATTGCTATTGAATCTGCAGAAGCTCTAGCTTACATGCATTATCTGCTAGTC  
AGAAGATACTTCATGGAGATGTCAAGTCCAGCAACATTCTCCTAGATGATGACTTCAAGC  
CAAAAGTCTCAGACTTTGGAATATCTAGACTCATATCTATAGAGAAGAACCACACTAACT  
TCGTCGTAGGGGATATAAACTACATAGATCCTGTGTATATGAAAACAGGGATACTTACAG  
AGAAGAGTGACGTGTATAGCTTTGGGGTTGTGCTCTTAGAACTAATCACAAGAAAAAAGG  
CAAGGTATGATGGAACAATAGCCTCCCAATAAACTTTGTTAAATCTTACATGACGGATA  
GCCAGGCAAGAGAGATGCTCGATGATGATATCACGTACCTGAAGTCATGGACTGTCTTC  
ACATGATTGGTAGGATCGCAGTTCAATCTTTGAAGGAAGACGTGGATGAGAGGCCTACCA  
TGAAGCATGTTTTGGAGCACCTTCATTTGGTGAGAAAGGAATGGATGCAAAATCAAGGGC  
ATATGAGTTGTTATCAAAGTTGATGATTATTGCATCACCACAACAACGCTTACGACAACA  
TAGTTGCCTTTTCAGTGTGAAGCTATATATTGCACTACTTTGCGCTGATGGTATACCTTTGC  
ATTATAAGATGAAATAATTCTGTTTGAAGATTTATATATTGTGTTGTTTTAGATGTTT  
AACTAAAGATTTGTATGTTGCTATCACAGCTAATAATACGTTGAACCTTTGTAAGTTCTTT  
TAACTAAGGTTTTGTACGTTGGTATCATAGCTAGTAATATGTTGAACCTTTGTAAGTTCTT  
TTAACCAAGGTTTTGTACATTGATATCGTAGCTAAATAGCTAGGTGGCCACGTAATTGT  
ACGGTAGCACCTATACAAAAATTTCTATCTTTTTGACATGATTGTCTTAAAAATTTGTT  
AAATAGCCCTCTCATTGTCTTATGATTTTTAAATATCAAACTAATCATTATCAGTTTTT  
CAATTTGCAGAATGTTTGATTTATAACATTGTAGTCATTATTTAGGCCAGGTGATGATA  
CCAAAATCTACGAGTGGGCAACAGTCCGGAAGAATACTGATAGCTAGTGGAATCAATCAA  
GCAATAGGTAGATAGATAAGTGAAGTACCCATACCAACTACATAACTACTTAACTACTAG  
GATGTGAAGTAGGAGATGGTTCAAATCAGAATACATTTTCAAGGAGTTCGCAGAGATCAT  
TTACCTTGTAATCCTTCTTCAGAGAGTGAAGCAACTTAGCAGCTTCGATTGCTGGTCGTT  
GATGCACGCAGCCACTCGGGCCCTCCCGTCCGAGGAATCCACTACTGATTTGAAGGTTTA  
TTCTTGTTGCTGCTGTATCTGTATAAATCTGTGGGTGTGAGTGCATGTTGTTATCCTG  
AAAATGCGATCGATGTTGCTTATATTCCCTGCTTCATTTTCTGTTGCAGTCAGGTTCTT  
CACAAGCTGCTAA

>OsWAK121 9639. t04303, Chromosome 11, post-processing  
ATGGCAACAATAAGCGAGTAGTGGAGCTGGAGCGCTGCATGTTGATTGGCGTCTGTCTG  
CTTCTGCTATGCCTCCTGCACACCGCTGAGGCGCAGTTGATGCAGCATCCGCCGGCGGAT  
TGCCCAGAAACGTGCGGCAATATAGCTATCCCTACCCATTTGGCATTGGCAACAATTGT  
TCCTTGCTAGGGCCGGCAGGCGACGACTTCACCGTCGTATGCAATGATAGCTACAACCCA  
CCAAGGCCCTTCAGGGGTGACTATGAGATCACCGGTATCGTGCTGGAGGAAGGCGTGTG  
AACGCGAGTACACAGCCGTGCGGTATATCTGCTATAGCTCGCCCAACACCTCCCAACAA  
TTCACCATGTCTATTGACCTCGCCGGCTCGCCTTTCCTCATCTCGACGACAGGCAACAAG  
TTCACGGCCATCGGCTGCAACACCCTGGCGATGATTATAGGCAAGGAAGATATGACCTAC  
TTTACCGGCTGCATCTCCTACTGCGGTGGGGATGTACAAAAGGCCGCACCCGATGGCTCG  
CCGTGCAGTGGCCTCGGCTGCTGCCAGACTGAACCTCACGCCGGAGCTCAGCTTCTTGAAC  
GTCACCTGGGGAGTTCGATGGCCACAACGACACTACAAATAGTTCGTGGGATTACAGCCCC  
TGCAGTACGCTTCTATAGCCGATAAAAACTGGTACTCCTTCAAGCGGAGGACCTCGTT  
GGCAATGCCAACTACTTTGACAAAAAAGGCATTCTTTGGTGCTGGACTGGGCTATCAGG  
AGTAACGGGTCTTCATGCCCGCAGAGTCTGGCAAGATGGCAAACCCGGTTGTGCCTTAC  
GGTGCTTGCCTGAGCAGCCACAGCTACTGCGTCAACGTACCAACAACGGACACGGGTAC  
CTCTGTAATTGCTCCGATGGATATCATGGCAATCCTTATCTCCCCGAAGGATGCATAGAT  
ATTAATGAGTGTGATCCATCCACTTATAAAGAGAATCCTTGCCCTGGTGGGACATGCCAT  
AACCTAGAAGGTGGCTACAAATGTAAATGCAACTTTGGGCGAAGAAAAGATAGAAAAAAC  
AACAATTCCTGTCAACCAGTACTATCCAAATCAGCTACAGCGCTGATCGCAACAATATGT  
GCCATCGCAATTTCTGTCATCGTACTCATTTTCTTGCGCATGGAATATGAGAAGAGGAAG  
CTTAGAGATCATTTCAACAAAAATGGTGGTCAACTTCTCAAAAACATAGGTATTAAGATA  
TTCACAAAGGAGGAGGTAGGCAAAATCACAAACAATTATAGTATCATTCTTGGAAAGGGT  
GGCTTCGGTGAGGTGTACAAGGGAACCTACTAATGACAACCAGCAAGTTGCGGTGAAGCGC  
TCCATTGCAAGTTGATGATGAGGCACGCAAAAAGGATTTTGCTAATGAGGTTACAATTCAA  
TCTCAAAATCAATCATAAGAACGTGGTTAGACTTGTGGGTTGTTGTTTGGAGACAAATGTC  
CCAATGCTGGTCTCCGCGTACATACCAAAAGGAAGCCTGCACGATGTGCTTCATGGTAAT  
GGCAATCACGTTGCAAAATATAATCTCACATTACAAGTACGTCTAGAAATTGCTATTGAA  
TCTGCAGAAGCTCTAGCTTACATGCATTATCTGCTAGTCAGAAGATACTTCATGGAGAT  
GTCAAGTCCAGCAACATTTCTCTAGATGATGACTTCAAGCCAAAAGTCTCAGACTTTGGA  
ATATCTAGACTCATATCTATAGAGAAGAACCACTAACTTCGTCGTAGGGGATATAAAC  
TACATAGATCCTGTGTATATGAAAACAGGGATACTTACAGAGAAGAGTGACGTGTATAGC

# OsWAKs-Supplemental Data 1[1].txt

TTTGGGGTTGTGCTCTTAGAACTAATCACAAGAAAAAGGCAAGGTATGATGGAAACAAT  
AGCCTCCCAATAAACTTTGTAAATCTTACATGACGGATAGCCAGGCAAGAGAGATGCTC  
GATGATGATATCACGTACCTGAAGTCATGGACTGTCTTACATGATTGGTAGGATCGCA  
GTTCAATCTTTGAAGGAAGACGTGGATGAGAGGCCTACCATGAAGCATGTTTTGGAGCAC  
CTTCATTTGGCCAGGTGATGATACCAAATCTACGAGTGGGCAACAGTCCGGAAGAATA  
CTGATAGCTAGTGGAATCAATCAAGCAATAGTCAGGTTCTCACAAGCTGCTAA

>OSWAK122, 6324.t00019, Chromosome 11, pre-processing  
ATGGCGGTGAAGAAACACAACGTCGCCATGCAATTACAAGTGGTAGTACTGTGGCTTGTA  
GGAGTAGCATTATTTTCTGTGATGGCGTCGTCGCTCCGGCGGCCGTAGCGGCAGCACCG  
CCGCCCCGGAGTGCCCCGAGCAAGTGCGGCGACGTCGACATCCCCTTCCCCTTCGGCGTC  
GGCGACGACTGCGCATGGCCGGGTCCAGATGACTTCAACGTCACATGCAACCATAGCTTT  
ACCCCTCCCAGACCCTACTACAGCAACATGGAGATGAAGGACATCTCGCTGCCGAAGGGG  
GAGATGCGCGTCTACACTTCCGTGCTGCAAAACTGCTTCGACTTGTCCAACACCAGCAGC  
AGCTCCGAGTCCGACGTAGGCTCGCCATGGCTCGACCTCGCCGGGACGCCGTTCTTGTG  
TCGCCGGAGAGGAATGAGTTCACGGCCACCGGGTGCACACGCTGGGGATGATGTACGGC  
AGGGAGGACGGGAGCTACTTGACCGGCTGCGTCACGACGTGCGCGAGCTTGGATGCCGCC  
GCCAACGACGGTGACCACTGCGCGGGGCTGGGTTGCTGCCAGATCCAGTCCATCCCTACA  
AACCTTACCTTGTGAAGGATTGTCTGTGCGCCAACATCACCGACAGGAAGATTGCTGCG  
TGGAACCCATGCCGCTACGCCTTTATAACCGACCGAGACGGGTACGTGCTTACTACCTCC  
TTCTTAGAATATACTCCCTCCGTTCTCTAAATGTTTAACTGTTGACTTTTTAAACATA  
TTTGATCACTTGTTTTATTCAAAAACCTTTATGAAATATGTAAACTATATGTATATATA  
AAAGTATATTTAACAATGAATCAAATGATAGGAAAATAATTAATAATTACTTAAATTTTC  
TGAATAAGACGAACGGTCAAACATGTTTAAATAGTCAACGGCGTCAAAAATTTTAGGAT  
GGAGGGAGTAGAATGATTTTGTTCGTTAGTATATGATATATTACTTTATGACGCAA  
AAATGAATATATTAGATTATCAAAAAGTATTTACTTAAATTATGATATAGTATTATACTTTA  
TTAGCATATAAATGATATCCTCATAGAATAATTGTTGATCAAAGTCACACATACCTATCA  
ATATCTTAAATGTATTTTAAATAAATCGTATATTTGTTGATATTTCTATATATATTGGA  
ATAGAAAATAATGGTCAAAGTTTTTGGCACCGTGTTCTTGTTCAAGACAATAATTATTTT  
TTAATCTGGAGGGAGCATATGGATTGAGAAGTTCATTCCTCAAAGGTTATGCACATACTT  
TTCCGTAATCGTAAAGGAAGTCGTTTAGGATAGCAACACGGTCTCTAAAACACAACCTTG  
ACTCTTGTCTTCTACAAAAATATTACTGAAAAATGATATATGATACTTTTATAAAAAGT  
ATTTTTCAAGACAAATCTATTCATATAATTTTTACATTTTCAAACCTCAACAACCTTAAGAG  
TTATTTATGATTTATATTTCTAAGGTTTGACTTAAACATTATCCTAAACGACTTCCTTTA  
TGAGTACAGAGGGAGTATGTACGTTTATGACAAGTTCTGAAAACATTAATTTGATGACCC  
TTGTAAAATACTATCCCAAATTAAGGACTAAAATGACCCAGGAGCGAAACTTTAAGGACC  
ATATTAATCTATTCCTTATATATTATGATGCAATATCTAGCCATACATATATAGTAT  
GTAGCTATTCTAGTATGTTTACTAGTTTCAAACCATCCATTATAATTAGGTACT  
ATATATTATTTATTAATAAATATTTAGAAATTAATAGTTTATAAGAAATTTAACTTTTTT  
TAATGTAATACCTTATTGTTTCAATTATATTTGTTAATTATTAATTCAAAATTGTTCTAC  
GGGACATTACGACGATGGCTGACAGGGATGATCAATTTGACGGTTTTGTGCCATTCTCTG  
ATGTTAAAAACCGTGAGGAAAAAATATCTTTCTGGTAGAATATACCCACAGCAATGTGC  
ATATGGCATCTGTAGATACACAGTATGAGTACCGCAAAAAATGACATTTTTTCTCCCT  
TTATTTCTTAATATAATTATTTAAGTAGAATTATATATAAATATACAAATTTAGAGA  
CGGCAAGAAAAATTTGTACCAACATATAGCAAACTAGCTAGTGAGATGCGCTATTTTCTC  
AAGACATAATATGCCTAGTGCCATTTTAATTAATTAATTGACTAATTAACGAATGGCCCA  
CCAAGATATTTGATGCAGAAGGCAATCGATATCTGAAAAATATATATCCGATCGAGTAAT  
TAAACATACTATTTCAATATTAAGATCTAGGATTTTGTTTTTAATCAGGCAATTCAGGTA  
CAATTTTAGCCGGAAGGATTTGGGTGCTCAGGCAACAAGATATTTGCAAACCGGGACGG  
CGAGATGGTCGTCCTACGGAGCTTGACTGGGCCATCAGGGGAACAAATAGGTCATGCTC  
TGTCTGCGTCAGCGACCAAAGCGACTGCGCCAATGCCACTAACGGAGACGGGTATCTCTG  
CAAGTGCTCCGAGGGATACGACGGCAATCCCTATCTCAAAGGCAATGGCGGATGCACAGG  
TTAGTTCTTAATTAATTTCTTAATTTCTCCATCATGGATTATACTCCTATATCATTACT  
AGTACAGTATCACTCATTGACAATATAATATGACGATTATTTAAATTTACTGTTTTACCA  
TTGATACATGTGCTGATGACATATTGACGAATGCAAGGAACAGATCGTTGTTCTACT  
GGCAGCAGATGCCATAACACAGAGGGTTATTATTATTGCAAATGCCGTTTTCCACGTAGA  
GGGGATGGCAAAGTTAATGGCAAAGGATGCCACCTTCCCAAATATATAGTCCCAGCGCTT  
GGTACGTAAATAAGCGTTAATTAATTATTCTCCGCACTTATTACTATAGCATTACATTAC  
TAAAGTCTGATTTAAGAAACACCCTAAAGTCTTTTCGGCTAGCTCCACAAAGTGGTGGGC  
TAGCTTAGTTGGGTCTGAAGCTCTATCCCTACAGTTTATGTTGATATTAGATCCTTCCCTA  
ACATTGCGAGTGCAGTCTGATTTGAATCAATGGCTCATTCTTTCAATTGATCATTGATT  
TGTCTGCATATATATACAGCGACGGTGTGCTCTGTGATTTCTCTTACGGTCCTTGTGT

OsWAKs-Supplemental Data 1[1].txt

GCTTGTATAAGAGACGGAAGAGAAGAATGTTTGCCAACAACAATGGTGGCCGGCTGCTCA  
AGGATATGAACATCGTCCTCATTACGGAGAAAGACCTAAACAAGATGACAAAGAATAGGA  
GCACCAAGATCCTCGGAGAGGGTTCCTTCGGCAAGGTCTACATGGAAACCCACAAGAACC  
AGCCGGTTGCCGTGAAGTACTCCAAGGGAAAGCGCAAGCTGGCACAGACGACGCATGGCA  
AAGACATCAAGTGCATGAACAAGAACATGTTCCAAAACGCCTTTTGTGGTCCAAAGTTC  
CATCCTCGCCGGAAGAAGATTCTGTCGTACGAGTGTCCGGCCCGGAGTTAGTGGACGAGC  
TAAGGGTCCAGTCACTAATCCAGCACGAAAACGTGGTCAGTCTCGTTGGATGCTACATAG  
AGACGGAGGAACCCACGTTAATCCTTGAGTTTATCCCAAACGGGAGCCTCGAGAAAATGC  
TTCATGGAGATGACCGGCGCCCCCTCTCGCTATTAATTGCAGCGCCTTGACATCGCCATC  
GGCTCTGCGAAGGCTCTTTCCTACATGCACTCCTCTAGCCTTATGCATGGAGATGTCAAG  
CCAGCCAACATCCTCCTTGATGACAACCTGAACCCTAAGGTCTCTGACTTTGGGTCTCT  
GAGCTCATATTGAAATTCAGCACGTGTGTGTTGACAAGAATATGTCGATCCTGTGTGC  
ATACTGACGAACAAGTATACTATGGAGAGCGATGTCTACAGCTATGGGGTCTGTCTCCTG  
GAGTCTCATACCCGGAAGGGCCAAAGTACGACGATGAAAGAAGCATCCGAGTAGAATTT  
GTGAACCAAGTACAAAGACAACAACGAAAGGAGGAAGATGTATGACCAAGACATGTTGTCTG  
TCTACGGATTCCCTATATCCTTACTGCATGGAGTGCCTTGACAGGATGGCGGCCGTGCGG  
GTCCGGTGTCTGAAAAACAAGGTGGACAAGAGACCGACCATGGCGGAGGTCTGCGAGGAG  
CTTAAGCAGCTGAGAGAGCAAATAAGCACGCGTATGTCCTAG

>OsWAK122, 6324. t00019, Chromosome 11, post-processing  
ATGGCGGTGAAGAAACACAACGTCGCCATGCAATTACAAGTGGTAGTACTGTGGCTTGTA  
GGAGTAGCATTATTTTCTGTGATGGCGTCTGTCGCTCCGGCGGCCGTAGCGGCAGCACCG  
CCGCCCCGCGGAGTGCCCGAGCAAGTGCGGCGACGTCGACATCCCCTTCCCCTTCGGCGTC  
GGCGACGACTGCGCATGGCCGGGTCCAGATGACTTCAACGTCACATGCAACCATAGCTTT  
ACCCCTCCCAGACCCTACTACAGCAACATGGAGATGAAGGACATCTCGCTGCCGAAGGGG  
GAGATGCGCGTCTACACTTCCGTGCTGCAAACTGCTTCGACTTGTCCAACACCAGCAGC  
AGCTCCGAGTCCGACGTAGGCTCGCCATGGCTCGACCTCGCCGGGACGCCGTTCTTGTG  
TCGCCGGAGAGGAATGAGTTCACGGCCACCGGTGCGACACGCTGGGGATGATGTACGGC  
AGGGAGGACGGGAGCTACTTGACCGGTGCGTCACGACGTGCGCGAGCTTGGATGCCGCC  
GCCAACGACGGTGACCACTGCGCGGGGCTGGGTTGCTGCCAGATCCAGTCCATCCCTACA  
AACCTTACCTTGCTAAGGATTGTGCTGTGCGCCAACATCACCGACAGGAAGATTGCTGCG  
TGGAACCCATGCCGCTACGCGCTTTATAACCGACCGAGACGGGCAATTCAGGTACAATTTT  
AGCCGGAAGGATTTGGGTGCTCAGGCAACAAGATATTTGCAAACCGGGACGGCGAGATG  
GTCGTCCCTACGGAGCTTGACTGGGCCATCAGGGGAACAAATAGGTCTGCTCTGTCTGC  
GTCAGCGACCAAAGCGACTGCGCCAATGCCACTAACGGAGACGGGTATCTCTGCAAGTGC  
TCCGAGGGATACGACGGCAATCCCTATCTCAAAGGCAATGGCGGATGCACAGATATTGAC  
GAATGCAAGGAACCAAGATCGTTGTTCTACTGGCAGCAGATGCCATAACACAGAGGGTTAT  
TATTATTGCAAATCCGTTTTCCACGTAGAGGGGATGGCAAAGTTAATGGCAAAGGATGC  
CACCTTCCCAAATATATGTTCCCGACGCTTGCGACGGTGTGCTCTGTGATTTCTCTTACG  
GTCCTTGTGTGCTTGATAAGAGACGGAAGAGAAGAATGTTTGCCAACAACAATGGTGGC  
CGGCTGCTCAAGGATATGAACATCGTCCTCATTACGGAGAAAGACCTAAACAAGATGACA  
AAGAATAGGAGCACCAAGATCCTCGGAGAGGGTTCTTTCGGCAAGGTCTACATGGAAACC  
CACAAGAACCAGCCGTTGCCGTGAAGTACTCCAAGGGAAAGCGCAAGCTGGCACAGACG  
ACGCATGGCAAAGACATCAAGTGCATGAACAAGAACATGTTCCAAAACGCCTTTTGTGG  
TCCAAAGTTCCATCCTCGCCGGAAGAAGATTGCTGTCGACGAGTGTCCGGCCCGGAGTTA  
GTGGACGAGCTAAGGGTCCAGTCACTAATCCAGCACGAAAACGTGCGCCTTGACATCGCC  
ATCGGCTCTGCGAAGGCTCTTTCCTACATGCACTCCTCTAGCCTTATGCATGGAGATGTC  
AAGCCAGCCAACATCCTCCTTGATGACAACCTGAACCCTAAGGTCTCTGACTTTGGGTCA  
TCTGAGCTCATATTGAAATTCAGCACGTGTGTGTTGACAAGAACTATGTCGATCCTGTG  
TGCATACTGACGAACAAGTATACTATGGAGAGCGATGTCTACAGCTATGGGGTCTGTGCTC  
CTGGAGCTCATACCCGGAAGGGCCAAAGTACGACGATGAAAGAAGCATCCGAGTAGAA  
TTTGTGAACCAAGTACAAAGACAACAACGAAAGGAGGAAGATGTATGACCAAGACATGTTG  
TCGTCTACGGATTCCCTATATCCTTACTGCATGGAGTGCCTTGACAGGATGGCGGCCGTC  
GCGGTCCGGTGTCTGAAAAACAAGGTGGACAAGAGACCGACCATGGCGGAGGTCTGCGAG  
GAGCTTAAGCAGCTGAGAGAGCAAATAAGCACGCGTATGTCCTAG

>OsWAK123, 6324. t00020, Chromosome 11, pre-processing  
ATGGCGGTGAAGAAACACAACGTCGCCATGCAATTACAAGTGGTAGTACTGTGGCTTGTA  
GGAGTAGCATTATTTTCTGTGATGGCGTCTGTCGCTCCGGCGGCCGTAGCGGCAGCACCG  
CCGCCCCGCGGAGTGCCCGAGCAAGTGCGGCGACGTCGACATCCCCTTCCCCTTCGGCGTC  
GGCGACGACTGCGCATGGCCGGGTCCAGATGACTTCAACGTCACATGCAACCATAGCTTC  
AGCCACCCAGACCTACTACGGCAACATAGAGATCAGGGACATCTCGGTGGCGGCCGGG  
GAGATGCGTGTGTACACTCCCGTGGTCTACCAAGTGTACAACACATCCGACCACGTGCGAC

OsWAKs-Supplemental Data 1[1].txt

TCTTCAACCAGCTTCCTGCAGCTCAACATCACCGACTCGCCGTTCTGGTCGCTCCGGGG  
AGAAACGAGTTTCACGGCCATCGGCTGCGACACGTTGGCGTGGCTGCAGGGCAGGGATGAC  
TGGAGCTTCTTGACCGGCTGCATCACGAGCTGCGTGAGCTTAGACGAGGCTGCCACGAC  
GGCGAGCAGTGCTCCGGGCTGGGTTGCTGCCAGGTGCCTTCCATTCCGCCAACCTTGCC  
CTCGTAGAGCTGAATTGGGGAACTTAACAAAAAATATGCATGGAGATACAGCCCATGC  
AGCTACGCCTTCGTGGCTGAGAAAGCATGGTAAGTTAAATAGTAGTAATAAAGAAAATCT  
AGCTATCAACTCTGGTAACACAATTACTACTCCATATGCATTGGTGCTAATATTAGTATA  
GGGACAATTGCGTTTTTACCCTATTTTAAGGACTAACTACTAATTTGGTCCTGCTTTTTT  
AGTTGACCCCTTTTTTTATAAATGAAGGCGAGACTTGGCCCTACTCTGGGAAGTCAACAT  
GACGGTGTTAACTTAAGACAAATGTTTCATTTATACCCTTGTAATTTAACCCAGTTTCT  
TAAAGTTTTTTTATTCAATGCAGTTTTGTGCATTATTACTATATATTAATTTGCCTCAAA  
CACAAATATGGCAGGATTTATGTCTACCAAAAAAAGAAAAAGAAAAAATACATGCCA  
CCCCTCCTCCTCGTAGTCGAACCTGCCGCCGCCGCCGCTCCTCTTCGTGAGCCGCCGCCA  
TCCCTCCCATGCCGCCGCCGCCGCCGAGCCACTCCTCCACCTTGTCAGCCGCCACCAA  
CCCTCCTATTCAATTTAGCCACCGCCGACGGCAGCCATTGCACAAGGAGAGCAGCGGGAG  
GAAGTTCCTCTAAGGCCGCCGCCGCCGCTCCTCCTACACAAGCCGGCGTCGCTCGCC  
GCTCCCTCCCTCCGCGAGCCAGCGCCGCCGCGGATCCCCTCCCTCCACGAGCCGCCGCCGA  
CGCCAGCACTCGGAGAGAGAGAGAGAGAGAGAGAGAGAGAGGGGATACGGGGGAGAGACGGG  
ATAGATAAGGATAGGGTTTGTTCGAGGGTATTTTGGTCATTACGAAATGTAATTATATTT  
CTTTCTTTTTTTTTAAATGAAACCTTAACGGTGCTATGAAAACATGGTCAAACGGAGTGT  
TTGTTTTTAAAAAAGTAGGGTCAAATAAACAACTAGAAAAAATAGGGTCATATTAGTAGT  
TAGGCTTCAAACATAGTAAAAAAGCAATTGTCCCATTAGTATATGTTGATTTAGGCACC  
ACATTTATAAATTAACATATGGTAGTTTATAGAATTTAGAGCAGATATAAGCGCATCCTT  
CTTCTACTTACTTTAATAATAATTTTATAAATATTTCTGGTGAACCCTACATTCATTTTC  
ATATTTTTAATTACATATAATTTATGCATAGAAGAATGTTATATTATTTTGTGAATATAT  
ATTTCTGTTCTTATTATATACTATTATATATAGCACACTCAAAGAAAGAGAGAGAGAAA  
ACAATATATCATATGCGGGCGTGATCTATTGGGGCGGGGTGTGGTAAGGAAATTACAGTT  
TGCATTGTGTTCTCTCCGTAGTTTTTCTCAAAGGCATGTATATGTTATCACGTGAAACTA  
TTTATACTTCTTTAAAGATCTAAATGGTGGTGTTGAGTGTGGTGAATTTGACACCACCA  
CCATTATGTGGGTCCCCGCAAATAGTGAGGTAGGTGGACTTTTTGTCCATTTCTAACCTC  
AAGCCATCAAACATGAAGTTTTTTTTTGGAGTGAGATAAAAAATGATTAATAATATGAC  
CTAAATATTTTACAATGAGAATAGCTTTATTTTAAATTTGGAGGTTTAAAGTGACGGTG  
AGGCTCTCATATTTAATTTCCATTGTAACATGGAACGGAGGGAGTATCATTATGGAAAT  
TGTGGAGTTGGCAACTTACTGAGGATAGATGTAGATATCTGACCCATTTTCACTCCCTAC  
TCAACAACTGGACTGTTTAGCTAGGGCACCCATTGAGTTTACTGATGCACATATATATA  
TTATAATATATATAGGTACAAATTCAGCCGTGGAGATTTTAGCCGTGCCGGTAGCAAGAG  
CTTTATGAATCGTGCTGGAGACAGAAGTGCTGTACAGTGCTTGATTGGGCTATCAGGAG  
CGACGGATCGTGCTCGTCAACATCGCGGGTGCCTCCTGCTGTGTGAGCCCAACAGCTA  
CTGCGTCAACACCACCAACGACAGGGATATCTTTGCAAGTGCTCCCCGGGATATGATGG  
CAATCCCTACGTACCCGGTGACAGTGGGTGTACAAGTTAGTCTTTTTAATCAATTATGTT  
TAGTTAGTCTTTTTAATTTCCGGCTCTATATTGATATGCATGCATGCATGGACTAATATTA  
ATTTCTTTCATTGGCATGAATGAATTAGTTACTACTTCTTGATGTAGGAGTACGTTGTA  
ATCTTTGCTGAATTTGCTCGTATGGGATTGGTTAATATGTTTAAATTATACTATTTAGTAT  
TTCATACCAATTTATTTATGTGCAGATTTAATGAATGCAAGCTTAGAAGAGAAGACCC  
TGCCAAGTACAGTGAACCTTTATCCATGTTACGGTGGTAGCAAATGCCATGACACAGAGGG  
TGATTACAGGTGCAAATGCCGTTTGGGACGTAGAGGGGACGGCAAAATCGATAATGGATG  
TCAACCCATAATCCCCACCTGTAATTGGGATTCTTGGTGAGCCATGACCATTGTTTCAT  
ACTTATAGCGTTTTTTAATAGAAATTAGAGTAAATTTAGAAAACCTCACGCTTTTATGA  
TCAAGGTTAAATAAAGCCACATATATTATGATGCGTGTACATAATCTCACAGGTTTAAAT  
GTATGATCTTTGTGTTTTATAATAAGACTTCACCTTTATTAATAATCTTGATTAATTACAG  
TATATATATTTGAAACAATTTTTTACAGTAGCGAAGAGATAAACTATATATCAACCATA  
CTCAAGAACATAATAATTTAAAGTTTTATATACACCATATGTTTTCAACTTTAAGTAAAT  
TCATGCTCAACATGCATAAAGATAGGGTTTTATGAACTTTAGAGCCATAATACATAGAG  
TTAAAGTGCCACAAGTCATAATACATGTGGTTTTGACAACCTTCAGCTATGTATAAAACAT  
GAAGTTTTTGAATTTACTCAAATAATCAATGTATTATGACTTAAGTTGTAGCTAGTTAC  
TCCCTCCGCCCATAATATATGGGATTTTGAGTTTTTATTTGCACTCTTTGATCACTCGT  
CTTATTCAAAAAATTTTGAATTTATTTTTTTATGACTTGCTTTATTATCCAAAGTACTT  
TAAGCACAACTTTTCGATTTTTATTTGCACAAATTTTTGAATAAGACGAGTGGTCAA  
ACAGTGTAACAAAAAATCAAAATCCCTTATATTATGGGACGGATGGAGTAGTTAGTTAA  
GTAGTTAGTTAAAGCGTCATCATTTAATATTGCCCTACTTAAGTATAGCTAGTTAGTTA  
TATATGATGTAAACGTAGCTAATATATTGATTAATGGTGCTTTCTCTAATCTATACTTTT  
TATAGAGTTAAAGGCCAATAAATCTAAAGCTCAATATGCAACCATAACACACCATCATC  
CACTAGCAATAATTACATATTTAATCTCATACAAGCATACAACATGATCTACAATTTTTT



OsWAKs-Supplemental Data 1[1].txt

TAATTCTAGAAATCAAATACAAGCATATTCAATCATCACCCCTCATATCATTTGCATAA  
TATTTTAAACAAATCTATCTATCAACTTTATAATATTTAACATGTACTTATCAATATCAAT  
ATGTTTACACTAAAGCACGGGTATCATTGACTGATAAACCTTGATGTTTCATTATTTT  
CTTTTCTTTTTTACACCTAGGTTGATTGTCAAAAAAAAAAATATTGAGAATTGCTTAGTAA  
TTCCTGCAGCAAATCACGGGAATCACCTAGTTACTTATATGTTTAATTGGTTTGTTC  
ATTTGCAGTGATAGCCGGTGTGTGCTATTTGGTTTGGTCCTTGTGTGCTTACGTAAGAA  
ATGGAAGCTTAAAGGGTGTATGACCGTAATGGTGGCCAAATGCTAGAGAAGACGAGCGT  
TAAATCTTTACAAAGCAGGAATTGGACAAGATAACTAACAACAAAAGCAACAAGATAGG  
GAAAGGCGCCTTCGGTGTGGTCTACAAGGAACCCACGACGATCAGCCGGTCGCCGTCAA  
GTACTCCATCGAAAAGAGCATATCGCGGACTCGTGGCAAGGATGAGTTCGTGAAGGAAAT  
CACGGTGCAACTTCAAGTCAGCCACGACAACCTGGTGTGCCTCATTGGTTGTTGCCTCGA  
GGTGGAGGTCCCTATGCTGGTCTTCGAGTTTCGTCCCTAATGGTAGCCTCGAGAGCGTCCT  
TCATGGGGCAGAGCGGTGCGCTCTCCCGCTGCTGAAACGGCTGGATATTGCCATTGGCTC  
TGCGAAAGCTCTTACCTACATGCACTCGCATTCCCGCCGCTGCATTTTTCATGGTGATAT  
CAAACCTGCCAATATTCTCCTTGACGACAACCTTATGCCTAAAGTCTCCGACTTTGGGTC  
ATCAGAGTCCGTATTGAAAACCAAGCACCGAAGCGTGTGTGCCGACATGGGCTACATAGA  
TCCTGTGTATATGGTAACAGGCAATTTTAGACTGAAGAGTGATGTCTACAGTTTCGGTAT  
CGTGGTCTTAGAGCTCATCACCCGAAAGAAGGCCGTGTACGATGGGAAAAGCCTTCCGAT  
AGAATTTACCAACTGTTACGAGGATGATAATGCCAGAAGGAATATGTACGACCAGGACAT  
ATTGTCTGCAGAGGCTCTACAACCTCACTGCATGGAGTGCCTCGACAGAATGGCCGGCAT  
TGCTGCCAGTGCCTTGAATACAACATAGACAAGAGGCCGACTATGGCGGAGGCGCTACA  
GGAGCTTATCCAATTGAGAGCAAAGGTTGCAGGAAAATGA

>OsWAK123, 6324.t00020, Chromosome 11, post-processing

ATGGCGGTGAAGAAACACAACGTCGCCATGCAATTACAAGTGGTAGTACTGTGGCTTGTA  
GGAGTAGCATTATTTTCTGTGATGGCGTCGTCCGCTCCGGCGGCCGTAGCGGCAGCACCG  
CCGCCCGCGGAGTGCCCGAGCAAGTGCGGCGACGTCGACATCCCCTTCCCCTTCGGCGTC  
GGCGACGACTGCGCATGGCCGGGTCCAGATGACTTCAACGTCACATGCAACCATAGCTTC  
AGCCCACCCAGACCCTACTACGGCAACATAGAGATCAGGGACATCTCGGTGGCGGCGGGG  
GAGATGCGTGTGTACACTCCCGTGGTCTACCAAGTGTACAACACATCCGACCACGTCGAC  
TCTTCAACCAGCTTCTGCACTCAACATCACCGACTCGCCGTTCTGGTGGTCCGGGG  
AGAAACGAGTTTACGGCCATCGGCTGCGACACGTTGGCGTGGCTGCAGGGCAGGGATGAC  
TGGAGCTTCTTGACCGGCTGCATCACGACGTGCGTGAGCTTAGACGAGGCTGCCACGAC  
GGCGAGCAGTGCTCCGGGCTGGGTTGCTGCCAGGTGCCTTCCATTCCGCCAACCTTGCC  
CTCGTAGAGCTGAATTGGGGGAACCTTAACAAAAAATATGCATGGAGATACAGCCCATGC  
AGCTACGCCTTCGTGGCTGAGAAAGCATGGTACAAATTACGCCGTGGAGATTTTAGCCGT  
GCCGGTAGCAAGAGCTTTATGAATCGTGCTGGAGACAGAAGTGTGTTACAGTGCTTGAT  
TGGGCTATCAGGAGCGACGGATCGTGCTCGTCAACATCGCGGTCGCTCCTGCCTGTGTC  
AGCCCCAACACGCTACTGCTCAACACCACCAACGGACAGGGATATCTTTGCAAGTGCTCC  
CCGGGATATGATGGCAATCCCTACGTACCGGTGACAGTGGGTGTACAAATATTAATGAA  
TGCAAGCTTAGAAGAGAAGACCCTGCCAAGTACAGTGAACCTTTATCCATGTTACGGTGGT  
AGCAAATGCCATGACACAGAGGGTGATTACAGGTGCAAAATGCCGTTTGGGACGTAGAGGG  
GACGGCAAAATCGATAATGGATGTCAACCCATAATTCCCCACCTGTAATTGGGATTCTT  
GTGATAGCCGGTGTGTGCTATTTGGTTTGTGCTTGTGCTTACGTAAGAAATGGAAG  
CTTAAGGGTGCTATGACCGTAAATGGTGGCCAAATGCTAGAGAAGACGAGCGTTAAATC  
TTTACAAAGCAGGAATTGGACAAGATAACTAACAACAAAAGCAACAAGATAGGGAAAGGC  
GCCTTCGGTGTGGTCTACAAGGAACCCACGACGATCAGCCGGTCGCCGTCAAGTACTCC  
ATCGAAAAGAGCATATCGCGGACTCGTGGCAAGGATGAGTTCGTGAAGGAAATCACGGTG  
CAACTTCAAGTCAGCCACGACAACCTGGTGTGCCTCATTGGTTGTTGCCTCGAGGTGGAG  
GTCCCTATGCTGGTCTTCGAGTTCTGCCCTAATGGTAGCCTCGAGAGCGTCCTTCATGGG  
GCAGAGCGGTGCGCTCTCCCGCTGCTGAAACGGCTGGATATTGCCATTGGCTCTGCGAAA  
GCTCTTACCTACATGCACTCGCATTCCCGCCGCTGCATTTTTCATGGTGATATCAAACCT  
GCCAATATTCTCCTTGACGACAACCTTATGCCTAAAGTCTCCGACTTTGGGTATCAGAG  
TCCGTATTGAAAACCAAGCACCGAAGCGTGTGTGCCGACATGGGCTACATAGATCCTGTG  
TATATGGTAACAGGCAATTTTAGACTGAAGAGTGATGTCTACAGTTTCGGTATCGTGGTC  
TTAGAGCTCATACCCGAAAGAAGGCCGTGTACGATGGGAAAAGCCTTCCGATAGAATTT  
ACCAACTGTTACGAGGATGATAATGCCAGAAGGAATATGTACGACCAGGACATATTGTCT  
GCAGAGGCTCTACAACCTCACTGCATGGAGTGCCTCGACAGAATGGCCGGCATTGCTGTC  
CAGTGCCTTGAATACAACATAGACAAGAGGCCGACTATGGCGGAGGCGCTACAGGAGCTT  
ATCCAATTGAGAGCAAAGGTTGCAGGAAAATGA

>OsWAK124, 4517.t00012, Chromosome 12, pre-processing

ATGATTTGTCCATGGAGTGATCGGGCGGCGGGTGGCGCTGCTGCTTCTGTGCGCGGGG

OsWAKs-Supplemental Data 1[1].txt

GAGAATCAGATGGTCCGAGTGTGACGACAGCCGACGAAGACGAGGTGCGCCGCCGGCGTC  
 GTCGACACCTGCGGCGACGTGGGCGTGCCGTACCTGTTCCGGCATCGACGGCGGTAGCTGC  
 AGCTTCTCCCGGGCTTCAACCTCACCTGCGACCGACCAAGCAGCCACACAGGCTGTTT  
 CTCGGCGACGGCTCCACCTCCAGGTACCGAGATCTCCCTGGCCAACTACACGGTGCGC  
 GTCCTCAACGGCGTGGCACCGTGAACCTTACCTTTGCGGGGCACAACGATTCCACGGCG  
 AAGTGGGCGCGAGTCAGCGTCGGCCAAGACGACGGGCCGTACATCGTCTCAGAGGAGCAC  
 AACCAGCTGGTGGTGACGGGGTGCAACATCATGGCCTCCCTGCTCGGGAACAGCGGCAGC  
 AACGTATCATCGGCTGCTCCTCCTTCTGCTCCATCACCGACTGGTGGGCGCCGACCCA  
 ATAGTGCACCTCCGGCGCCGGCGCGTGTCTCCGGCCTCGGCTGCTGCGACGTCAACATC  
 ACCATCGGCCGGCCCTCCTACGAAGTGCAGCTCAGGTGGCTCGACTGGGACCACAACCTAC  
 GACGACCTCCTGCCCATCGCCGTGCGCATCGCGGAGCGCGGTTGGTTCGACGGCATGTGCG  
 ACCAAGCTTCTCAGGAAAAACAGCCGACGCGTGTTCCTGTCGCGTGGTGTGGAGTGG  
 GCCGTGGCGTCTGTTCAAAAGCCGCCCACTCCCGTAGACGTGAACAGCACGTGCCCAAG  
 GACCCGGCGAGAAGCGAGTGCCGTAGCAGCAACAGCTTCTGCCGCAACATCGCCAACATG  
 TACCGCAGCGGTTACGTGTGCAAGTGCAGACGCGGTACCAGGGCAACCCTTACCTCACC  
 GGCGGCTGCCAAGGTACATGTATACTCCCTCCGTTTCTTTAGTATAAGACTCCGTTTCTT  
 TAGTATACGACGCTACTGACTTTTAAACACATGGTTAACCATTATCTTATTTAAAAAATT  
 TATGTAAATGTATAAGATATAAGTCATGCTTAAATTATTTTGAATGATAAAACAACCTCAC  
 AAAAAATAAATTATAAACGTAATAATTTTTTAATAAGACGAATGGTTAAACGTGTAATAA  
 AAAAGTCAATGGCGTCATTTATTAATAAACCGGAGGTAGTATGACTTATATACGTATTAT  
 ATTATACTCCCTCAGATAACATCGTTAATTTTTTGGCATGACGTTTCAGCATTTCATTCTTA  
 TTCAAAAAATTTACATAAATATTATTTATTTTGTATGAGATGCTTTATTATTAATAAT  
 TTTTACGTATCATTTTATACTTTAGCATATTTACATTAATTTTTTTTTGATAAGGTGAATGG  
 TGTCGAACATTATTTCAAAATTCGACAGCACGTATATATTAACAAAAACAAAGATAACTT  
 ATACAATATTCATATTCTATACTTAGTGATTCCTAAGCTAAATTAGCTATCTATATACC  
 CCATTATATCTTCTGTTTTCTCGGTCAACATAACATTCAGATATCGACGAATGTTTCGCT  
 GCCGGGCAAGTGCTTCGGTGAGTGACAAACACGCCAGGAACTACAGTTGCCGTTGTCC  
 GCGTGGTGCGCGTGGCAATCCCTACACCAAGATGGCTGCATCAAGTTTCTCTAGGTCA  
 GCACCGTAATCATAACTATTAATTGCTAGCTATCTTCTGCTTTTATTCTAGCTTTTAATT  
 TTATAAAAAAGAATGTACCAATGCAAACTTTTTTTACAAAGACTAGCAAAATATGGTCGAT  
 CTGCGCGTTGCAACGGATTAGTTTATGAAAAAAATCTAGCATGGTAAGCTAATTGTGC  
 AAATAACACTGAAACAAACAGCACTTCTATGATTTTTTTTTTGTGTCCTATTATGCAAA  
 CACTGAATAGTCATTCAACCTTGAATAATGCAGTGGGTAAATCCTATCCACAGTATT  
 CATTTAGGTTATGCATACTTGTGGATAGGTCCGGGTCTACAGAGAAAATGGATTGGTG  
 CGGGTTGGATTTGCTTTGGTGTGAGTCCGAATGGTCTTTCTCTCGTCTTCTTGGCATGT  
 TGATGAGAAACCAACGTGGTGGGAGGGACGGCATCACGTTGAACCGCAACGCTAGTGATG  
 CTGGCGCCAAGAGAAATGTCTATTTGTAAATAAGTTTCTCTAAGATTCTATTTGTAAAA  
 AAGTTTTAAAAAGATCTAAATATGAAGTCTCTAATTAAGTTGTCCAGATAGTTTGAAC  
 AAAGAGTTTAGACCGGTTCAACTCCCGTGTGCTCTCTCCAGGCGATCCGGGAGGCGACG  
 CCTCAAAGCACCTGAGGCTCTGCGGTGAACCCCCCTCCCCCCCCCAACCGCCGGCGGC  
 GATGCTCCCTATTGCCGGCGGTGGCCCCCTCCCTTTGGCCCTCCACCCTCTTCTCCTGGCC  
 ACCTCCTCCCTTTTTCTCTCTTTCACAAGCTTTTCCCTTCCCTTTTATTAGATCAAT  
 CTCTCTGCGCCTTAGTTCTGATGGTGATAGCGGGATATAGCAGAGCCACCAGCGAGGTGT  
 GGTGTGTTGGTTTTCAGGACCGAGCTGTGACCTGGTGTGTCGAGTCCCATGGTGTG  
 GTGGTCTCATGGATGAGGGCGGTGGTGTTCGCGGGAAGGCTGGATCTGGTGCCCTAAGT  
 TGGCAAGGTCTGATCTTCCCTTATCCAGTTCGGTGGTGGTGTCTACCGGCATGGCATGG  
 CTCCTTCATGCGGCAGCTACACAGCCAGTGCATGTCCATCTATGTGGAGTCTGGCACAG  
 CGGGCGTGGTTATAGGTTTGTGGTGTGCGGTTGCAAGCAGGCGGCAAGAGCACTAGCGA  
 TGGCGGTTGTGGTGGCTACCAACGTGGAGGCTACTATCTGGCAAAGACAGAGTTGGAAGG  
 TGCTAGTCTCTGGTCAGCTTGAATTCGGCGGCACACTTTGA

>OsWAK124 gi |32976308|dbj |AK066290.1| Oryza sativa (japonica cultivar-group) cDNA  
 clone: J013066106, full insert sequence

GACTCATCTAATACCGAATTATTAGCTGGAGAGATCGATTCAAGGCTATTGTCTGGATCGAATGATTTGT  
 CCATGGAGTGTAGCGGCGGCGGCGGTGGCGCTGCTGCTTCTGTGCGCGGGGAGAATCAGATGGTCCGAG  
 TGTGACGACAGCCGACGAGAGGTGCGCCGCGCGTGTGTCGACACCTGCGGCGACGTGGGCGTGCC  
 GTACCTGTTCCGGCATCGACGGCGGTAGCTGCAGCTTCTCCCGGGCTTCAACCTCACCTGCGACCGCACC  
 AAGCAGCCACACAGGCTGTTCTCGGCGACGGCTCCCACCTCCAGGTACCGAGATCTCCCTGGCCAACT  
 ACACGGTGCAGCTCTCAACGGCGTGGCACCGTGAACCTTACCTTTGCGGGGCACAACGATTCCACGGC  
 GAAGTGGGCGGAGTCAGCGTCGGCCAAGACGACGGGCCGTACATCGTCTCAGAGGAGCACAACCAGCTG  
 GTGGTGCAGGGGTGCAACATCATGGCCTCCCTGCTCGGGAACAGCGGCAGCAACGTATCATCGGCTGCT  
 CCTCCTTCTGCTCCATCACCGACTGGTGGGCGCCGACCAATAGTGCATCCGGCGCCGGCGCGCTG  
 CTCCGGCCTCGGCTGCTGCGACGTCAACATCACCATCGGCCGGCCCTCCTACGAAGTGCAGCTCAGGTGG

OsWAKs-Supplemental Data 1[1].txt

```
CTCGACTGGGACCACAACCTACGACGACCTCCTGCCCATCGCCGTGCGCATCGCGGAGCGCGGTTGGTTCCG
ACGGCATGTGACCAAGCTTCTCAGGAAAAACAGCCGCAGCGCTGTTCCCGTGCCCGTGCTGGAGTG
GGCCGTGGCGTCTGTTCAAGCCGCCCACTCCCGTAGACGTGAACAGCAGCTGCCCAAGGACCCGGCG
AGAAGCGAGTCCCGTAGCAGCAACAGCTTCTGCCGCAACATCGCCAGCGTTACCGAGCGTTACGTGT
CGAAGTGCAGACGACGGGTACCAAGGCAACCTTACCTACCCGCGGCTGCCAAGATATCGACGAATGTTT
GCTGCCGGGCAAGTGCTTCGGTGAGTGTAACAACACGCCAGGAACTACAGTTGCCGTTGTCCGCGTGGT
GCGCGTGGAATCCCTACACCAAAGATGGCTGCATCAAGTTTCTCTAGGTCCGGGTCTACAGAGAAAAT
GGATTGGTGCGGGTTGGATTTGCTTTGGTGTGAGTCCGAATGGTCTTTCTCTCGTCTTCTTGGCATGTT
GATGAGAAACCAACGTGGTGGGAGGGGACGGCATCACGTTGAACCGCAACGCTAGTGATGCTGGCGCCAAG
AGAAATGCTATTCTGTAATAAGTTTCTCTAAGATTCTATTTGTA AAAAAGTTTTAAAAAGATCTAAAA
TATGAACGCTCTTAATTAACCTTGTC
```

>OsWAK125, 1894.t00003, Chromosome 12, post-processing  
ATGAGAGGATTGCAGGCCGCCGTGCTGTTACGGCGGTGGCGGCGGCGGCGGCCGACG  
AACTGCACCACCCGCTGCGGCACATCAGCTTCGAGTACCCGTTTCGGCGTGGAGCCCGGC  
TGCTACCACCCAGGCTTCAACCTCACCTGCAGCAGCAACGACACCAGGCTGTTTCATGGGC  
GACGGCACCGTGAGGTGCTCGACATCTCCATCCCCAACCTCCACCTTGCGCGTCAACGCC  
ACCGCCATGGCGTTTCGACCCCGCCGACGAGTGCAGCGCGGCGCTATCAACGCGACGACG  
ACATGGCGCGCCGCCGCCGCCGACGACGACGGGGGCCCGTTTCGTCGTGTCGAGGCGC  
AACACGATCGCGCTGATGGGATGCAACGCCCGCGTCGACCTCCCGGGCGGAGACCGCCGC  
CAGACGACAACCTGGTCAGCTCCTGCACCGCCGCTGCCCACCGGTTCGGCGGCGCGGAC  
GACGCCGCGGCTCAGCAGCAGCGCGACGGCGGCGACGGCCACACCATCGCATCATCGAC  
GCTTGAACGGCAAGTGCTCCGGCGTCGGCTGCTGCCAGGCAACATCATGCTGGGCTAC  
CCTTCCTACACCATCCAGATCAAGCAGCTGCAGGAGAAGAACCTCCATAGCTTCGACTTC  
CAGTACATCGCCTACATCACGGACGAGACGCTGAATTTACGGAAGAGATCGCCGGCCGC  
ATCGCCACTCCGGCGGCGCTCCCGGCCACGCTAGACTTTGTGATCAGAAGCAACTCGTCG  
TGTTCCAGCGCGGCGAATCGACGGCGGCGGCGGAGTGCCCGCAGCGAACACAGCTTTTGT  
GAGGATTACAAGGGTGTTGGTAATACCTCCTTGGGTATAGCTGCGTCTGCTCGGAGGGT  
TACCGAGGAAATCCCTACGTTTGCTGGTGGATGCCATGAGCTTAATTGCTAA

Page 187

OsWAKs-Supplemental Data 1[1].txt

ATGCAAGAAGCATTAGTCCTTGCAATGAAGGTCATACCAAGCATCATCTTCCTCGCAGTG  
GCAGTGCAGGATGCAGCTTCTTCTGGGTACAGTCTGTCTGTTGCCAGGATGCCCTGATAAG  
TGCGGAAATGTTTCCATCCCCTACCCTTTTGGCGTCGGCCCCAGCTGTGCTGCAACCAGC  
ATCAGCAGCTACTTCAATCTCACCTGCAGCAACACCTTCAACCCACCACGGCCTATGGTT  
GGGGACTCTGAAGCACTCGTCGAGGTCACTGACATCTCACTGGAGCACGGCGAGATGCGG  
GTGCTCAGCCCTGTCTACTACATCTGCTTCACGGCAAATACCACGTTACCAAGTTCACC  
GAAGGGTATGAGCTGAAGCACACACCCTTCTCCCCTCCCCGTGCGCAACCGCTTCACA  
GTCATCGGTTGCAACACCCTGGGGCTCATCGGTGGCTACAAGGGAACCGTGAGCCACTAT  
GTGACTGGTTGCTACTCCTATTGTGAGAGCATCAACAGCACATCTGATGGGGCGCCATGT  
GCAGGGATGGGCTGCTGCGAGGCCGCCATACCGACTGACCTCACCGCCTGGGGGGCGATG  
TTTGAGATGAACCAGAGCAAGGTATGGAGCTTCAACCCGTGTTTCTATGCCATGGTCAGT  
GAGGTTGGGTGGTACAGCTTCCAGCAGAAGGACCTTGTTGGCCACCTTGGGTTTCATAGAT  
GACAGAGCTCAGAGGGGAGCACCTGTTGTGGCTGATTGGGCCATTAGGAATGGCTCATGC  
CCGGAAGAGGGGAAAGGCATACCTGGTGATTATGCGTGCATCAGCGCAAACAGCTACTGC  
ATGGACGCGAACAATGGTCCAGGGTACTTATGCCAGTGCTCCAAAGGGTATGAGGGCAAC  
CCTTATCTTCTGAACGGCTGCCAAGGTTAGGTTTATACTTAACTGGTAGAATTCTATAC  
CATGCACAGTGTTAATTCAGGTAGAGTTTGTAAAGCTATACTTCTACAAAATCATATGAAC  
ATTCATCAATAGACAGCAATTCTACATGGTTTCCACCATAATTCAGCATGGGACTGGAAA  
AAGAAACAGTCAGCTTCATTTGTGGGGTAGATTTTTAATTACAAAGTGAAAAGGTCAATTT  
TGGAACAAGTATTGAAAGGGGAGTTATAGCATTCTTAAGTAAATTGGCTGGTTGACTTTA  
GCTTACCTATGATAACGAAATTAATATAGATTATATAGTTTACATACAAATTTGGTCTGAAT  
TTTATGAATGGATGTTTTTGTGCTATCTTCAGACGTGGATGAGTGCGCATTGCGTAAGC  
AAGATCCCAAGTATGAGGATATGTATCCATGCAGAAAAGGAATCTGCCACAACACACCAG  
GAGGATACTTATGCAATGCAAGTTAGGGAAAAGATCTGATGGTACAAATTATGGATGCC  
GGCCTCTGCGCACTACAGCCGAGAAAAGTGGTTATTGGTAAGGTCACATCTGCAGATTTTA  
CTTCTGTTTTCACCTACATTAGGATGTTCTTCTACTCAAAGTAACATAATACTATGGCAA  
GAAGAATACTAATTTTGAACACTACCTAGAATTGTCAATAAAAAAATAAATTTAAGAAGTT  
AGTAGCAGAAAATTATTAGTATCAATATTCTGACAGAGATAATTTTAAAGGCACCAGTGT  
TTCGGCCATTGCGCTAATGTCTTTGGCATGCGTGTGGCCATGCAAGTACAAAGGAAAAG  
GCATAAGAAGGACAAAGATGAGTACTTCAAGCAAAATGGAGGTCTAAAGCTATATGATGA  
GATGAGATCAAGGAAGGTAGACACAATCCGCATACTCACTGAAAAAGATATAAAAAAGGC  
CACTGACAACCTACAGTGAAGATCGAGTTCTTGAATTGGAGGTACGGAATGGTCTACAG  
AGGAATTTGGATGACAACAAGAGGTAGCCATAAAGAAGTCCAAAGTAATTAACGACGA  
ATGGAGGGAAGAATTTGTCAATGAGATAATAATCTTGTACAGATCAACCACAGAAACAT  
TGTGAGGTTGATAGGATGTTGCCTGGATGTACATGTCCCATGTTGGTCTATGAGTTTGT  
ATCCAATGGGACCTTGTCTGAGTTCCTCCATGGCACTGATCGTAGATCATCAATCCCCTT  
GGACATTCGCCTGAAAATAGCCACACAATCAGCAGAAGCTCTAGCATACCTGCATTATC  
AACGTCTCGCGCATCTTTCATGGAGATTTCAAATCGGCCAATATTCTTTTGGACGATCA  
GCACAATGCAAAGGTTGCAGATTTTGGGGCATCAGCACTGAAGTCCATGAACGAAAGTGA  
GTTTCATCATGTTTGTCCAAGGAATTTGGGTTACCTTGACCCGGAGAGCTTCATTAGCCA  
CCGTCTAACTGACAAAAGCGACGTCTACAGTTTTTGGGGTGGTTCTGCTGGAGCTGATGAC  
AAGAAAGAGGGCAATCTATGCCAATAGCATCAATGAAAAGGAATCATTGTCCTATTCTTT  
TCTCCTGATGTTTGTAGACAACATTCACCGGAATATGCTGGACAGAGAAATTATGGATAA  
AGAAACCATGTTTGTGCTGAGAACTTTCCATTCTTGCCGCCAAGTGCCTGCGACCAAG  
AGGAGATGACCGGCCAACAATGAAGGAAGTTTATAGAGTGCCTACAGATGATAAGGAGACA  
CCCAATGCACGGCGCTAGTGATCACAAAGGAGACAGCTATGCACATCACAACATATGAAGG  
ATCGCCATCAATGGTTGTTCACTTGAATGAGACCATATACGAGAGCATTGAAACGTCCAG  
ATTGGTTGATGATCTTGTGAGATGA

>OSWAK126, 5650.t00002, Chromosome 12, post-processing  
ATGCAAGAAGCATTAGTCCTTGCAATGAAGGTCATACCAAGCATCATCTTCCTCGCAGTG  
GCAGTGCAGGATGCAGCTTCTTCTGGGTACAGTCTGTCTGTTGCCAGGATGCCCTGATAAG  
TGCGGAAATGTTTCCATCCCCTACCCTTTTGGCGTCGGCCCCAGCTGTGCTGCAACCAGC  
ATCAGCAGCTACTTCAATCTCACCTGCAGCAACACCTTCAACCCACCACGGCCTATGGTT  
GGGGACTCTGAAGCACTCGTCGAGGTCACTGACATCTCACTGGAGCACGGCGAGATGCGG  
GTGCTCAGCCCTGTCTACTACATCTGCTTCACGGCAAATACCACGTTACCAAGTTCACC  
GAAGGGTATGAGCTGAAGCACACACCCTTCTCCCCTCCCCGTGCGCAACCGCTTCACA  
GTCATCGGTTGCAACACCCTGGGGCTCATCGGTGGCTACAAGGGAACCGTGAGCCACTAT  
GTGACTGGTTGCTACTCCTATTGTGAGAGCATCAACAGCACATCTGATGGGGCGCCATGT  
GCAGGGATGGGCTGCTGCGAGGCCGCCATACCGACTGACCTCACCGCCTGGGGGGCGATG  
TTTGAGATGAACCAGAGCAAGGTATGGAGCTTCAACCCGTGTTTCTATGCCATGGTCAGT  
GAGGTTGGGTGGTACAGCTTCCAGCAGAAGGACCTTGTTGGCCACCTTGGGTTTCATAGAT  
GACAGAGCTCAGAGGGGAGCACCTGTTGTGGCTGATTGGGCCATTAGGAATGGCTCATGC

# OsWAKs-Supplemental Data 1[1].txt

CCGGAAGAGGGGAAAGGCATACCTGGTGAATTATGCGTGCATCAGCGCAAACAGCTACTGC  
 ATGGACGCGAACAATGGTCCAGGGTACTTATGCCAGTGCTCCAAAGGGTATGAGGGCAAC  
 CCTTATCTTTCTGAACGGCTGCCAAGACGTGGATGAGTGCGCATTGCGTAAGCAAGATCCC  
 AAGTATGAGGATATGTATCCATGCAGAAAAGGAATCTGCCACAACACACCAGGAGGATAC  
 TTATGCAAATGCAAGTTAGGGAAAAGATCTGATGGTACAAATTATGGATGCCGGCCTCTG  
 CGCACTACAGCCGAGAAAGTGGTTATTGTACAAAGGAAAAGGCATAAGAAGGACAAAGAT  
 GAGTACTTCAAGCAAAATGGAGGTCTAAAGCTATATGATGAGATGAGATCAAGGAAGGTA  
 GACACAATCCGCATACTCACTGAAAAAGATATAAAAAAGGCCACTGACAACTACAGTGAA  
 GATCGAGTTCTTGAATTGGAGGTACGGAATGGTCTACAGAGGAATTTTGGATGACAAC  
 AAAGAGGTAGCCATAAAGAAGTCCAAAGTAATTAACGACGAATGGAGGGAAGAATTTGTC  
 AATGAGATAATAATCTTGTACAGATCAACCACAGAAACATTGTGAGGTTGATAGGATGT  
 TGCCTGGATGTACATGTCCCATGTTGGTCTATGAGTTTGTATCCAATGGGACCTTGTCT  
 GAGTTCCTCCATGGCACTGATCGTAGATCATCAATCCCCTTGGACATTGCGCTGAAAATA  
 GCCACACAATCAGCAGAAGCTCTAGCATACCTGCATTCAACGTCTCGCGCGATCCTT  
 CATGGAGATTTCAAATCGGCCAATATTCTTTTGGACGATCAGCACAATGCAAAGGTTGCA  
 GATTTTGGGGCATCAGCACTGAAGTCCATGAACGAAAGTGAGTTCATCATGTTTGTCCAA  
 GGAACTTTGGGTTACCTTGACCCGGAGAGCTTCATTAGCCACCGTCTAACTGACAAAAGC  
 GACGTCTACAGTTTTGGGGTGGTTCTGCTGGAGCTGATGACAAGAAAGAGGGCAATCTAT  
 GCCAATAGCATCAATGAAAAGGAATCATTGTCCTATTCTTTCTCCTGATGTTTGATCAG  
 AACATTACCAGGAATATGCTGGACAGAGAAATTATGGATAAAGAAACCATGGTTGTGCTC  
 GAGAAACTTTCCATTCTTGGCCCAACTGCCTGCGACCAAGAGGAGATGACCGGCCAACA  
 ATGAAGGAAGTTTTAGAGTGCCTACAGATGATAAGGAGACACCCAATGCACGGCGCTAGT  
 GATCACAAGGAGACAGCTATGCACATCACAATATGAAGGATCGCCATCAATGGTTGTT  
 CACTTGAATGAGACCATATACGAGAGCATTGAAACGTCCAGATTGGTTGATGATCTTGTG  
 AGATGA

>OsWAK127, 6563.t00001, Chromosome 12, pre-processing  
 ATGCAGAAGTACGAACAAGTAGGTTCAAAAATAGTGCCACAGCAACTAGCAAGTGATCAC  
 CATACCTCCAACCTCCGCAACCATGCAAGAAGCATCCGTTCTCCTCATGCTCATCGTCTTC  
 CATGCAATGGCGATATCAACCACCACCTCTGAACCTGCAATTTCAATGCCAGGCTGCCCT  
 GGCAAGTCGGGAAATGTATCCATCCCTTACCCATTTGGCATCGGCGCTGGTTGTTCTGCG  
 ACCAGCTGAGCAGCTACTTACCATCACCTGCAACGACACCTTCCAGCCACCACGGCCT  
 ATGGTTAGAGACCTCCTATCAGAAACAGAGGTATCGACATCTCCCTGGAGCGTGGCGAG  
 GTGCGCGTTTACGGTCCAGTCAGTTACATCTGTTTCTCATCAAACACCACCATACCAGAG  
 AACCATACCACAGGGTTACCCCTGGAGGGTACGCCGTTTCGTCCCTTCCACCACCCGCAAC  
 CGCTTCATGGCCATCGGATGCCATACCCTCGGCATCATTGGTGGCTACATGCACAGCAAC  
 TCTAATCTATGTATGGCTGGCTGCTACTCTACTGCCAGAGCATCAACAGCACATCCAAC  
 GGTGCTCCCTGACTGCGATGGGCTGCTGCGAGACCACCATCATCCAGACCTGAAGGAC  
 TTCGACGCGATCTTGGTGTGAACCAGAGCGCGGTGTGGGAATTCACCCATGCTTCTAC  
 GCCATGCTTGTGGAGGCCGGATGGTACAGCTTCAGGCAGCAAGACCTCGTTGGGCACCTC  
 AGGTTTGTCAATGGGAGGGGCAACAGAGGTGTTCTGTATCCATGACTGGGCCATCAGG  
 AATGGCTCCTGCCCAGAGGGGAAGAAGGTGCCCAAAGACTATGCCTGTGTAGTTCAAAC  
 AGCAAGTGTGTGAAGCAAGTAATAGCCAAGGGTACCTGTGCAAATGCTCTGAAGGATAT  
 GAAGGGAATCCTTATCTTCCCAAAGGCTGTCAAGGTAACATACATATAAACTTTCTCTAG  
 ATTATATTTGGAGACCAAGATAAACAACCTCCAGGAATAACAACATAACCAGAACATAATT  
 ATAGCCAGTTTTAATGCTGCTGCGTAATATTTATTCTTTTTGTTACTCCCTCCATCCAG  
 AATATAAGTAGTTTTAGAGTTAGACACGGTTATTAAGAAAGTGTGTAGAATTAATAGGA  
 AGAGGTTGTAATTGGTTGAAAAGTGGAGGTAGGTGGGAAAAGTGAATGGTGGAGGGTTGT  
 GATTGGTTGGGAATGGAATGTTGGTGAAGAAGTTGCTATATTTTGAACAAATCCTAAGT  
 GCTAAAAGTTGTTATATTTTGGGACGGAGGGAGTACCTTTTTTTTTCAGCTTCCGTAACAAG  
 CAAAATAGTTCAAGCTTTGATTGTATTATCCCAAATACATACTTGTCTGTTTCAATTCT  
 ATTCAGACATAGATGAGTGCAAGTTGCGTAAGGAGGATCCCAAGTATAAAGAGCTATATC  
 CCTGCAGACATGGGATGTGCCAGAACATACCAGGAAACTATTTGTGCAAATGCGGGGTAG  
 GTAAAAGGCCAGATGGAACAAACTATGGATGTCAAACGTGCTTAACCAAGTTGAACGAG  
 TGATAGCAGGTAAGGACTAATGAGACTCAGAGAGTATACCTTTGGGTGAAACTAATGAG  
 CTTTTTCAGGTTTACGATGAGTTGATTCATCTTGAAAAATCATTCTGCAGGTCTCAGTGT  
 TTCCGCGATTGTGCTGATGGCTTTGATATGCTTGTGTCATGAAATTACAAAGAAGAAA  
 ATATAGGAAAGAAAAGGAGGAGTATTTCAAACAAAATGGAGGTCTTAGACTATTTGATGA  
 GATGAGGTCAAGACAAGTTGACACCATTCTTATACTTACAGAGAAGGAAATCAAGAAAGC  
 AACAGAGAATATAGCGATGATCGAGTTCTAGGATGTGGTGGTTCATGGAATGGTCTACAG  
 AGGAACTTTGGATGGTGACAAAGAAGTTGCCATAAAGAAGTCCAAAGTAATTGACGATGA  
 CTGCCGAGAAGAATTCGTCAATGAGATAATAATATTGTCACAAATTAATCATAGGAACAT

OsWAKs-Supplemental Data 1[1].txt

TGTGAGGTTACTTGGTTGCTGTTTGGAGGTAGATGTACCGATGTTGGTGTATGAGTTCGT  
TTCCAACGGAACCTCTCTGAGTTCCTTCATGGCAATGATCACCGAACACCAATCCCCT  
GGATCTTCGACTGAATATTGCTACACAATCAGCAGAGGCTCTTGCTTACATTCATTCATC  
AACGTCTCGCACAATTCTGCATGGGGATGTTAAATCACTCAATATCCTACTGGATGATGA  
ATATAATGCAAAAGTTGCAGACTTTGGAGCATCAACACTGAAATCCATGGATAGAAATGA  
TTTTATCATGTTTCATCCAAGGAACCTCTGGGTACCTTGACCCTGAGACTTTTTGTCAGTCA  
CCATCTTACTGACAAAAGCGATACCTACAGTTTCGGAGTTGTTCTTTTAGAGATCATGAC  
CAGAAAGAAGGCTCTGTACAATGATACTTTGAATGGAAATGAGGCGTTATCTCATATTTT  
CCCCTTGATGTTCCACCAGAAAAGGCACTGTGATATGTTGGATTTTGACATGATAGACGA  
GAAAGTTATGGTAGTACTGCAGAACTAGCTGAACTCGCCATGCATTGCCTGAACCCAAG  
AGGAGATGATAGACCAACGATGAAAGAAGTTGCAGAGCGCTACAAATGTTGAGGAGACT  
CCACATGCAGCTTGTCTCAAAATCGAGTCTACCAGAGTTTCTTGCTCGTATGAAGGATC  
ATCAATGCGTATTCCATCAGACCCGATGAAATACCAGAGCATGGAGACAGCCAAGCTGGT  
ACTGGATGCAGATATTGCAAGATGA

>OSWAK127a gi |32985319|dbj |AK100110.1| Oryza sativa (japonica cultivar-group)  
cDNA clone: J023005H19, full insert sequence

GGTTTTCTTCTCGGCGGCGCGTGGCTCTCCCGGCGCGGCGCGCGCGCGCGGCGGCCACTCTCCTCCCG  
CTCGCGCGAGCTGCTCTCAGATCTCCCCCTTACTGGGACTCGCTCCGTTGCTGCCTCCTCCCCATCCAAA  
TCGTGGAGATCTTTTCTCGGATCAGGATCTTCTTTGGGAAATCGACTGGCTCGCGACGGCGACGCGA  
TCGGGGTCGGGTCTCCGGTGGCTGGCTGGTGGCGGCCACGGTTGGATGGATTGACGGAGGGGAGGAGGG  
GGGAATCGGTGGTTCAGATCAAGCAAGCAAGCAAGCAAGTTTCTTTCGGGCACCGGATGCGAACTCCGG  
AGTTTCAGATCAGATCAGGTAACCTGCTTCAGATGTGTACCACCTTTACATTTTCAGGGCCTAATGCT  
AATCAATCAATAGGATCGATATGCAAGAGAATGAGATAATCTAGATATTTGAATTAGTAGATTACACTGG  
TAGCATCATTTCTTTTGGCATAGACGAAATGGTTTTAATTGGTCATTACATATGTTATGTTACCTGG  
ACATGTGGAATCTGTTGAAACAGGCATTCTTGGATATGTTTTGATACTTTGATGGTGTAGTTTGATCTGA  
TTAACAGATAGTGAAAAAAATCAAAATGTTCTATTTTTAATAGTTCATCATTATGACTGAAAACATCAC  
TTGCGATAGTACGTATAGTTGATGAGAATTGATGTGCAATTATACATTCTACATACTACAGCTGTGTTA  
GCCATAAGAAAGAAATTAATATACATAAAGAGTGACCTTGCAACACCAGAAGAACTTATTACTCTACTCG  
ATGAAAGGAATATACTGTTCTCATCTTGCAATATCTGCATCCAGTACCAGCTTGGCTGTCTCCATGCTCT  
GGTATTTTCATCGGGTCTGATGGAATACGCATTGATGATCCTTCATACGAGCAAGAACTCTGGTAGGACT  
CGATTTTGAGACAAGCTGCATGTGGAGTCTCTCAACATTTGTAGGCGCTCTGCAACTTCTTTCATCGTT  
GGTCTATCATCTCTCTTGGGTTCAAGCAATGCATGGCGAGTTGAGTATGTTCTGCAGTACTACCATAA  
CTTCTCGTCTATCATGTCAAAATCCAACATATCACAGTGCCTTTTCTGGTGGAACATCAAGGGGAAAT  
ATGAGATAACGCCTCATTTCCATTCAAAGTATCATTGTACAGAGCCTTCTTCTGGTCATGATCTCTAAA  
AGAACAACCTCCGAACTGTAGGTATCGCTTTTGTGAGTAAGATGGTGACTGACAAAAGTCTCAGGGTCAA  
GGTACCCAAGAGTTCCTTGGATGAACATGATAAAATCATTTCTATCCATGGATTTGAGTGTGATGCTCC  
AAAGTCTGCAACTTTTGCATTATATTCATCATCCAGTAGGATATTGAGTGATTTAACATCCCCATCGAGA  
ATTGTGCGAGCGTTGATGAATGAATGAAGCAAGAGCCTCTGCTGATTGTGTAGCAATATTGAGTCGAA  
GATCCAGTGGGATTGGTGTTCGGTGATCATTGCCATGAAGGAACTCAGAGAGGGTTCCGTTGGAACGAA  
CTCATACACCAACATCGGTACATCTACCTCCAAACAGCAACCAAGTAACCTCACAATGTTCTATGATTA  
ATTTGTGACAATATTATTATCTCATTGACGAATTTCTCTCGGCAGTCATCGTCAATTACTTTGGACTTCT  
TTATGGCAACTTCTTTGTACCATCCAAAGTTCTCTGTAGACCATTCCATGACCACCACATCCTAGAAC  
TCGATCATCGTATAGTTCTCTGTTGTTTCTTCTTCTCTGTAAGTATAAGAATGGTGCTCACT  
TGTCTTGACCTCATCTCAAAATAGTCTAAGACCTCCATTTTGTGTTGAAATACTCCTCTTTTCTTTCC  
TATATTTTCTTCTTTGTAATTTTCATGACCAGCAAGCATATCAAAGCCATCAGCACAACCTGCGGAAACACT  
GAGACCTGCAGAATGATTTTTCAAGATGAATCAACTCATCGTAAACCTGAAAAAGCTCATTAGTTTCACC  
CAAAGGTATACTCTCTGAGTCTCATTAAGTCCTTACCTGCTATCACTCGTTCAACTTGGTTAAGCACAGT  
TTGACATCCATAGTTTGTCCATCTGGCCTTTTACCTACCCCGCATTTGCACAAATAGTTTCTGGTATG  
TTCTGGCACATCCCATGTCTGCAGGGATATAGCTTTTATACTTGGGATCCTCCTTACGCAACTTGCAT  
CATCTATGTCTGAATAGAATTGAAACAGACAAGTATGTTTGGGATAATACAATCAAAGCTTGAACAT  
TTTGGCTTGTACGGAAGCTGAAAAAAGGTAATCCCTCCGTCCTCAAAATATAACAACCTTTAGCACTTA  
GGATTTGTTACAAAATATAGCAACTTCTTCCACCAACATTCCATTCCCAACCAATCACAACCCTCCACCAT  
TCACTTTTCCCACCTACCTCCACTTTTCAACCAATTACAACCTCTTCTATTTAATTCTACACACTTTCT  
TAATAACCGTGTCTAACTCTAAACTACTTATATTTCTGGGATGGAGGGAGTAACAAAAAGAATAAATATT  
ACGAGCAGCAGATTAAACTGGCTATAAATTATGTTCTGGTTATGTTGTTATTCTGGAGTTGTTTATCTTG  
GTCTCCAAATATAATCTAGAGAAAGTTTATATGTATGTTACCTTGACAGCCTTTGGGAAGATAAGGATTC  
CCTTCATATCCTTCAGAGCATTTGCACAGGTACCCTTGGCTATTACTTGCTTGACACACTTGTGTTTG  
AACTGACACAGGCATAGTCTTTGGGCACCTTCTTCCCCTCTGGGCAGGAGCCATTCTGATGGCCAGTC  
ATGGATGACAGGAACACCTCTGTTGGCCCTCCCATTGACAAACCTGAGGTGCCCAACGAGGTCTTGCTGC  
CTGAAGCTGATACCATCCGGCTCCACAAGCATGGCGTAGAAGCATGGGTTGAATTTCCACACCGCGCTCT  
GGTTTCATCACAAGATCGCTGCAAGTCTTCAGGTCTGGGATGATGGTGGTCTCGCAGCAGCCCATCCC  
AGTGCAGGGAGCACCGTTGGATGTGCTGTTGATGCTCTGGCAGTAGGAGTAGCAGCCAGCCACATATAGA

TTAGAGTTGCTGTGCATGTAAGCCACCAATGATGCCGAGGGTATGGCATCCGATGGCCATGAAGCGGTTGC  
GGGTGGTGGAAAGGGACGAACGGCGTACCCTCCAGGGTGAACCCTGTGGTATGGTTCTCTGGTATGGTGGT  
GTTTGATGAGAAAAAGATGTAACCTGACTGGACCGTAAACGCGCACCTCGCCACGCTCCAGGGAGATGTG  
ATGACCTCTGTTTCTGATAGGAGGTCTCTAACCATAGCCGCTGGTGGCTGGAAGGTGTCGTTGCAGGTGA  
TGGTGAAGTAGCTGCTCAGGCTGGTCGCAGAAACACAGCAGCCGATGCCAAATGGGTAAAGGATGGATAC  
ATTTCCGCACTTGCCAGGGCAGCCTGGCAATGAAATTGCAGGTTCAGAGGTGGTGGTTGATATCGCCATT  
GCATGGAAAGACGATGAGCATGAGGAGAACGGATGCTTCTTGATGGTTGCGGAGTTGGAGGTTCTTCCCA  
GCTCCCTACACATGAAGTTGTCTTGAAGTTGGAACCATGATGCTCTATGTAAGGCTGACTTTAGTTAAG  
GGGAAAAACGATGAAAGCTTCAGCTAAATATCAGCTCCTAAATTTCTGAGACATATAAAGCCAACCCACA  
CTATGGTTATCCGAAAGTTTCGAAATTTTAAGGTTCCGTTGTTTTTCCAATGTATACCACATTATTTGTATT  
GGATCAGAAAAGAAAAATTTCAATTTCCACAAATAGTCATTGTCCGACTCCAATTAACACCCGATGCCTGAATA  
TCCCAGACAAATTAGTGATGAACATTGAAATTTGGGTATGAGTTCTGAGGTGTATATCTTCTCTGAATTT  
TTTCTCCACTGTGAATTTATAGATTACTTCTAACAGTGATCAGGAGCACTGTAAATTTCTTACTTTG  
GATTACTAGCCATGGATTTGAATTTGATGCTCG

EDNA CRONE 5018488177 PART INSERT Sequence

GGTTTCTTCTCGCGCGCGCGTGGCTCTCCCGGCGCGCGCGCGCGCGCGCGCGGCCACTCTCTCCGCG  
TCGCCGCAGCTGCTCTCAGATCTCCCCCTTACTGGGACTCGCTCCGTTGCTGCCTCCTCCCCATCCAAAT  
CGTGGAGATCTTTCTTCGGGTATCAGGATCTTCTTTGGGAAATCGACTGGCTCGCGACGGCGACGCGAT  
CGGGGTCTCGGGTCTCCGGTGGCTGGCTGGTTCGCGGGCCACCGTTGGATGGATTGACGGAGGGGAGGAGGGG  
GGAATCGTGTTTCAGATCAAGCAAGCAAGCAAGCAAGTTTCTTCGGGACCGGATGCGAATCCGGA  
GTTTCAGATCAGATCGAAGTTGTGCGAGACGTTGATGAATGAATGAAGCAAGAGCCTCTGCTGATTGTG  
AGCAATATTCAGTCGAAGATACAGTGGGATTGGTGTTCGGTGATCATTGCCATGAAGGAACTCAGAGAGG  
GTTCCGTTTGGAAACGAACTCATACACCAACATCGGTACATCTACCTCCAAACAGCAACCAAGTAACCTCA  
CAATGTTCCCTATGATTAATTTGTGACAATATTATTATCTATTGACGAATTTCTCTCGGCAGTCATCGTC  
AATTACTTTTGGACTTCTTTATGGCAACTTCTTTTGACCACCTCAAAAGTTCCTCTGTAGACCAATCCATGA  
CTACCACATCTTAGAACTCGATCGCTATAGTTCTCTGTTGCTTTCTTGATTTCTTCTGTGAAGTA  
TAAGAATGGTGCAACTTGTCTTGACCTCATCTCATCAAATAGTCTAAGACCTCCATTTTGTGTTGAAATA  
CTCCTCCTTTTCTTTCTATATTTTCTTCTTTGTAATTTTCATGACCAGCAAGCATATCAAAGCCATCAGC  
ACAACCTCGGAAACACTGAGACCTGCAGAATGATTTTTCAAGATGAATCAACTCATCGTAACACTGAAAA  
AGCTCATTAGTTTACCCAAAGCCTTTGGGAAGATAAGGATTCCCTTCATATCCTTCAGAGCAATTTGCAC  
AGGAGCCATCTCTGATGGCCAGTCATGATGACAGGAACACCTCTGTTGGCCCTCCCATTGACAAACCT  
GAGGTGCCAACGAGGTCCTTGCTGCCTGAAGCTGTACCATCCGGCTCCACAAGCATGGCGTAGAAGCAT  
GGGTGAATTTCCACACCCGCGCTCTGGTTCATACCAAGATCGCTGCGAAGTCCTTCAGGTCTGGGATGA  
TGGTGGTCTCGCAGCAGCCCATCCCAGTGCAGGGAGCACCGTTGGATGTGCTGTTGATGCTCTGGCAGTA  
GGAGTAGCAGCCAGCCACATATAGATTAGAGTTGCTGTGCATGTAGCCACCAATGATGCCGAGGGTAGG  
CATCCGATGGCCATGAAGCGGTTGCGGGTGGTGGAAGGGACGAAGCGCGTACCCTCCAGGGTGAACCTG  
TGGTATGGTTCTCTGGATGGTGGTGTGATGAGAAACAGATGAAGTACTGACTGGACCGTAAACGCGCAT  
CTCGCCACGCTCCAGGGAGATGTCGATGACCTCTGTTTCTGATAGGAGGTCTCTAACCATAGGCCGTGGT  
GGCTGGAAGGTGTCGTTGCAGGTGATGGTGAAGTAGCTGCTCAGGCTGGTCGAGAACAAACCAGCGCCGA  
TGCCAAATGGGTAAAGGATGGATACATTTCCGCACTTGCCAGGGCAGCCTGGCAATGAAATTGCAGGTTT  
AGAGGTGGTGGTTGATATCGCCATTGCATGGGAAGACGATGAGCATGAGGAGAACGGATGCTTCTTGCATG  
GTTCTCGGAGTTGGAGGTTCTTCCAGCTCCCTACATGAAGTTGTCTTGAAGTTTGAACCACTGATGC  
TCTATGTAAAGCTGACTTAGTTTAAAGGGGAAAACGATGAAAGCTTCAGCTAATTATCAGCTCCTAAATTC  
TGAGCACATATAAAGCCAACCCACACTATGGTTACCGAAGTTTCGAAATTTTAAAGTTCCGTTGTTTTTC  
CAATGTATACCACATTATTTGTATTGGATCAGAAAGAAAATTTTCATTTCCACAAATAGTCATTGTCGAC  
TCCAATTAACACCGATGCCTGAATATCCAGACAATTAGTGTATGAACTCTGAAATTGGGTATGAGTTCT  
GAGGTGTATATCTTCTCTGTAATTTTTTCTCCACTGTAATTTATAGATTATACTTCTAACAGTGATCA  
GGAGCACTGTAATTTTCTT

Page 191

OsWAKs-Supplemental Data 1[1].txt

TACAATTTCAAGAAGCAGGATCTTGTGGTACCTCGGATTCATCAAGGAAAGAGCCAG  
AATGGTGTTCCTATTGTCTGCTGACTGGGCCATTAGGAATGGCTCATGCCCAAAGAAGGGG  
GAAAAAGAACCTAGCAGCTATGCCTGCGTTAGTGCAAACAGCTATTGCACGGCCGTGATA  
AATAGTCCAGGGTATTTGTGCAACTGCTCACAAGGATATGGGGGAAATCCTTATCTTTCA  
GATGGCTGCCAAGGTTTCAAGCAATTACTCAAATTTACTTGAATTTTGTACTTATTAACA  
TTGATTTAGTAGGCTGAAGTGAAGTCTGATTTTGTGGATTTTATTGAGTGGTTATATTG  
TTCTTGGTATCTTCAGACATAGATGAGTGTGAGATGCGTAAGCTGGACCCCAAGTATGAA  
GAATTATATCCATGCAGAAAAGGGGTCTGTGAGAACACACCAGGAAGCTACATATGCAAA  
TGCAAGAAAAGGAAAAAAGTCTGATGGTACAGGTTATGGATGCCAACCTGCGGATTCTCCA  
GACTATAGAATGGTTGTAGGTGAGCGCCGTGTATATAACAGTTCACCGTTGTTTCATCTT  
CATAAATAAGTGTCTGCAGAGTTTCATAAGTGAACATCTAAGGATCAGTTTCTTGTGATG  
ACAAACAAATTATATAAATTGACTTCCTACTGAATAGGAAAACATAAATGAATGCTCTA  
GTGCAGTTTTGTTTGCAGCTCTGTATAATCTAAACATTTTTAATATGCAATGCATGTCCC  
ATCTATTTAAGATATTCTTAATATTCAAGTGGCATTCTCAATTTGTTTAATTTATGTCCT  
ATGCATGAACATGGAATAAGAGGAACTCAAACCTTAGTATATATTTTTTTTCAGGTTTAAG  
TGTTTTCTGCCATTGTGGTAACCGCTATGGCATGCATGTTGATTATGCAATTACAAAGGAG  
AAGGCACAAGAAAGAGAAAAATTGAATATTTCAAACAAAATGGAGGACTCAGGTTGTATGA  
TGAGATGATATCAAGGCAGGTTGACACAATCCGTATACTTACAGAAAGAGAGATAAAGAG  
AGCCACTGAAAACATAACGAAGATCGAGTTCCTGGATCTGGTGGCCATGGAATGGTCTA  
CAGAGGAAGTCTGGATGACAACAAAGAGGTTGCCATAAAGAAGTCCAGAGTAATCAATGA  
TGATTGCAAGGAAGAATTTGTCAACGAGATAATAATTTTGTCTCAAATCAATCACAGGAA  
CATTGTGAGGTTACTAGGCTGTTGCTTGGATGTGGATGTCCCGATGTTGGTGTATGAGTT  
TGCGCACAAATGGGACCTTATCTGAGTTCCTTCATGGTACTGACCACAGATCACCAATCCC  
CTTGGATCTACGCCTGAAGATTGCCACTCAAGCAGCAGAAGCTTTAGCTTACTTACATTC  
ATCAACATCTCGCACAAATCCTGCACGGGGATGTAAATCAGCCAATATCCTGATGGACGA  
TCAGTACAATGCAAAGGTTGCAGACTTTGGAGCTTCAACCCTCAAGTCCATGGATGAAAG  
CGAGTTCATCTTGTTCGTCCAAGGGACGATGGGCTACCTTGACCCCGAGAGCTTTACCAG  
CCATCAGCTGACCGAGAGGAGCGATGTCTACAGCTTCGGTGTGGTTCTTCTGGAGCTCTT  
GACAAGAAAGAAAGCCTTATACACCAATGATTTCAACAAGAATGAATCTCTGTCTGACAG  
ATTTCTGTGCGATGTTTCGGCAGAACAACACCAAGCCATGCTAGACCCTGAAATTGTGGA  
TGGCTCCAATGTGGTGGCGATCGAGAAGCTTACCAAAGTCGTTGTGCAATGCATGAGCCC  
GAGAGGAGATGACCGGCCAACGATGAAGGAAGTCGAGAGAGACTACAGATGCTGAGGAA  
GCTCCAGATGCAGGCAACCTGTGATGGCGAAAACGATCGTGATGTCCATGACAATTTTGG  
AGGATCGCCGTCAGTGATCCTTCATTTTGATGAGATGACAGATAGCAGCATAGAAACGTC  
TAACCTTATTCTGAGCGAATGA

>OsWAK128a gi|32977138|dbj|AK067120.1| Oryza sativa (japonica cultivar-group) cDNA  
clone: J013096K04, full insert sequence

GATTGAAGCCGGCAATCCTCGCCGCGTGCAGCGGCGATAGCCTCGCCGCGCGCCGCG  
CCCCATCGCCGGCGAATCTTCCAGTGGTTTGACATAGATGAGTGTGAGATGCGTAAGCTGGACCCCAAGT  
ATGAAGAATTATATCCATGCAGAAAAGGGGTCTGTGAGAACACACCAGGAAGCTACATATGCAATGCAA  
GAAAGGAAAAAAGTCTGATGGTACAGGTTATGGATGCCAACCTGCGGATTCTCCAGACTATAGAATGGTT  
GTAGGTTTAAAGTGTCTGCCATTGTGGTAACCGCTATGGCATGCATGTTGATTATGCAATTACAAAGGA  
GAAGGCACAAGAAAGAGAAAAATTGAATATTTCAAACAAAATGGAGGACACAGGTTGTATGATGAGATGAT  
ATCAAGGCAGGTTGACACAATCCGTATACTTACAGAAAGAGAGATAAAGAGAGCCACTGAAAACATAAC  
GAAGATCGAGTTCTTGGATCTGGTGGCCATGGAATGGTCTACAGAGGAACTCTGGATGACAACAAAGAGG  
TTGCCATAAAGAAGTCCAGAGTAATCAATGATGATTGCAGGGAAGAATTTGTCAACGAGATAATAATTTT  
GTCTCAAATCAATCACAGGAACATTGTGAGGTTACTAGGCTGTTGCTTGGATGTGGATGTCCCGATGTTG  
GTGTATGAGTTTGCACACAATGGGACCTTATCTGAGTTCCTTCATGGTACTGACCACAGATCACCAATCC  
CCTTGGATCTACGCTGAAGATTGCCACTCAAGCAGCAGAAGCTTTAGCTTACTTACATTATCAACATC  
TCGCACAATCCTGCACGGGGATGTAAATCAGCCAATATCCTGATGGACGATCAGTACAATGCAAAGGTT  
GCAGACTTTGGAGCTTCAACCCTCAAGTCCATGGATGAAAGCGAGTTCATCTTGTTCGTCCAAGGGACGA  
TGGGCTACCTTGACCCCGAGAGCTTTACCAGCCATCAGCTGACCGAGAGGAGCGATGTCTACAGCTTCGG  
TGTGGTTCTTCTGGAGCTCTTGACAAGAAAGAAAGCCTTATACACCAATGATTTCAACAAGAATGAATCT  
GTCGTACAGATTTCTGTGATGTTTTCGGCAGAACAAACCAAGCCATGCTAGACCCTGAAATTGTGGAT  
GGCTCCAATGTGGTGGCGATCGAGAAGCTTACCAAAGTCGTTGTGCAATGCATGAGCCCGAGAGTAGATG  
ACCGGCCAACGATGAAGGAAGTCGAGAGAGACTACAGATGCTGAGGAAGCTCCAGATGCAGGCAACCTG  
TGATGGCGAAAACGATCGTGATGTCCATGACAATTTTGGAGGATCGCCGTGATGATCCTTCATTTTGAT  
GAGATGACAGATAGCAGCATAGAAACGTCTAACCTTATTCTGAGCGAATGACAGTACATCTTGCAACATG  
CTGCAACTTCACCTGAATTTGTCTGTGTAATGAGGTAGTAGGATGTAGTTCTGTTGATGTTATAGTCATT  
CTTTCCATTTTATTGAAATTGAAGTGTGTTAGAGCATACAGTTTCAGCCATTGGCTTGTGTTGTACTAA  
CCATTTGTTTCTGTCAATCTAATTTCTTCGAGAGGCAGTCGTGCC



>OsWAK128b gi|32974592|dbj|AK064574.1| *Oryza sativa* (japonica cultivar-group) cDNA clone: 002-112-E04, full insert sequence

CAGAATTTACAAATGGGGACTAGAGCAAATTATTAAGAGTCAACTCAGCCCATTTTTCAATTCCAAGTTT  
GCAGCTGGATATATCTGCTTGCACTTGACTTGCTGGATTGTGATGGATGACTAATAACAGATTAAAGA  
GAACCACACCTAATTCATACATCTATTTAACTATTCTAGTGTGCATACATCAGTTCATCCCAAGAAGAA  
GATAACACGATAGGCAAAGAAGGGATAGCCATAGATTCTTGTTGCTAGGTAAGCCAGCTATGGCGCATGC  
ACAGCTGCTTGTGTTTCTGATACCAATGGCCCTCTTCCTGAAGTTGGCAATGCCGGTGGACGGTGCCATG  
GCGATGCCGGGCTGCCGGGACAAGTGGCGCAATGTGGCTATCCCCTACCCCTTTGGCATTGGAGAAAAC  
GCTCTGCGACCAACCTAAACAGCTACTTCAACCTCATGTGCAATGACACCTTTCATCCACCAAGGCCACA  
AATCCGGGAACCGGAAGCACACATCGAGGTACCCGGCATCTCACTGGAGCGAGGCGAGATGCGTGTGCTC  
AGCCCTGTCAACCACATCTGCTTCACGTGCAACACCACATCCACCAAGTCCAGTGGTGTGCGGTATGACC  
TGAGCAGAACTCCCTTCTCCCATCGCCGTGCGCGAACCCGTTACCGTTCATCGGTTGCAACACCCTGGG  
GCTCATCACTGGCTACAGGGGTGCCTCGGGACAATACGTGACTGGGTGCTACTCTACTGTGAGGGTATC  
AACAGCACCTCTGATGGGGCACCGTGTGCCGGGATGGGGTGTGTGAGGCTTCCATACCTGCCAACCTCA  
CTGCCCTTCGCCGTGACATTTGATCTGAACCACAGCAAGGTGTGGACCTTCAACCCTTGCTTCTACTCTGT  
CGTCGCCGAGGTGCGGTGGTACAATTTCAAGAAGCAGGATCTTGTTGGTCACTCGGATTTCATCAAGGAA  
AGAGCCCAGAATGGTGTTCCTATTGTGCTGACTGGGCCATTAGGAATGGCTCATGCCCAAAGAAGGGGG  
AAAAAGAACCTAGCAGCTATGCCTGCGTTAGTGAAACAGCTATTGCACGGCCGTGATAAATAGTCCAGG  
GTATTTGTGCAACTGCTCACAAGGATATGGGGGAAATCCTTATCTTTAGATGGCTGCCAAGGTTTCAGCA  
ATTACTCAAATTTACTTGAATTTGTTACTTATTAACATTGATTTAGTAGGCTGAAGTGAAGTTCGTATT  
TTGTTGATTTTATTGAGTGGTTATTTGTTCTTGGTATCTTCAGACATAGATGAGTGTGAGATGCGTAA  
GCTGGACCCCAAGTATGAAGAATTATATCCATGCAGAAAAGGGTCTGTGAGAACACACCAGGAAGCTAC  
ATATGCAATGC

>OsWAK129, 6563.t00003, Chromosome 12, pre-processing

ATGCAAGAAGCATTAGCCCTTGCAATGAAGCTCATACCAAGCATCATCTTCCTTGCAAGT  
ACAGCGCAGGCTGCAGCTTCTTCTGGGTACAGTATGGCGTTGCCAGGTTGCCCTGACAAG  
TGCGGAAACATTTCCATCCCCTACCCCTTTCGGCATCGGCCCCAGCTGTGCTGCAACCAGC  
ATCAGCAGCTACTTCAATCTCACCTGCAACAACACCTTCAACCCACCACGGCCTATGGTT  
GGGGACTCTGAAGCACTCGTCGAGGTCACTGACATCTCACTGGAGCACGGCGAGATGCGG  
GTACTCAGCCCTGTCTACTACATCTGCTTCACGGCAAATACCACGTTCAACAGGTTCAAC  
GAAGGGTATGAGCTGAAGCACACACCCTTCTCCCTCCCGTCACGCAACCGCTTCACG  
GTCATCGGTTGCAACACCCTGGGGCTCATCGGTGGCTACAAGGGAACCGTGAGCCACTAT  
GTGACTGGTTGCTACTCCTATTGTGAGAGCATCAACAGCACATCTGATGGGGCGCCATGT  
GCAGGGATGGGCTGCTGCGAGGCGCCATACCGACTGACCTCACCGCCTGGGGGGCGATG  
TTTGAGATGAACCAGAGCAAGGTATGGAGCTTCAACCCGTGTTTCTATGCCATGGTCAGT  
GAGGTTGGGTGGTACAGCTTCCAGCAGAAGGACCTTGTTGGCCACCTTGGGTTTCATAGAT  
GACAGAGCTCAGAGGGGAGCACCTGTTGTGGCTGATTGGGCCATTAGGAATGGCTCATGC  
CCGGAAGAGGGGAAAGGCATACCTGGTGATTATGCGTGCATCAGCGCAACAGCTACTGC  
ATGGACGCGAACAATGGTCCAGGGTACTTATGCCAGTGCTCCAAAGGGTATGAGGGCAAC  
CCTTATCTTCTGAACGGCTGCCAAGGTTAGGTTCAAATTTACCATTGGTTTAGATTTTGA  
GAAACAAAACCTGGTAGAATTCTATGGCGTGCTCAGTGTTTGTTCAGCTAGAGTGTGTAAG  
ATATAGTTCAAAATATTATGAACATTCATCAATAGGCAGCAGTTCTCTTTGGTTTCCAGC  
ATAATTGAGTGGGACTGGAAAAAGAAACAGTCAGCTTCATTTGTGGTGCGGATTTTTTA  
ATTAAATAGTGAAAAGTTATTTTTCAGTCAATAGGCAGCAGTTCTCTTTGGTTTCCAGCAT  
AATTCAGCATGGGACTGGAAAAAGAAACAGTCAGCTTCATTTGTATTGCGGATTTTTTAAT  
TAAATAGTGAAAAGTTATTTTGAACAAGTCATGAAAGGCAAGTTATAGCATTCTTATAA  
GTAGATTAGGTTGATTTTAGTTTACCTATGATAATGAAAGTAATACAGACTAGCTTACAC  
AAGTTTAGTTTGACTTCTGAATGCATGCTTTTTGTCTCTGTCTTCAGACGTGGATGAGTG  
CGCATTACGTAAGCAGGATCCCAAGTATGAAGATATATATCCTTGCAGGAAAGGAGTCTG  
CCACAACACACCAGGAGGATATTTATGCAATGCAAGTTAGGAAAAAGATCTGATGGTAC  
AAATTATGGATGTCGACCTCTGCGTACTACAGCAGAGCAAGTGGTTATTGGTAACGTCAC  
ATCTGCAGATTTTACTTCTGTTTTCACCTACATTATAAGATGCGTCTTCTACTAAAGTAAC  
ACTCATATTGTGGCAAGAAAAATACTACTTCTGAAAGTAATTTTGAACACTACCTAGAAT  
TGTCGATAAAAAATAATTTTAAACAAATTTGGAGCAGAAAATTATTAGTATCAATATTCTG  
AAAGAGAAATTTTACAGGCACCAAGTGTTCGGCCATTGCGCTAATGGCTTTGACATGCGTG  
TTGGCCATGCAATACAAAGGAAAAGGCATAAGAAGGACAAAGATGAGTATTTCAAGCAA  
AATGGAGGTCTAAAGCTATATGATGAGATGAGATCAAGGAAGGTAGACACAATCCGCATA  
CTCACTGAAAAAGATATAAAAAAGGCCACTGACAACCTACAGTGAAGATCGAGTTCTTGGA  
ATTGGAGGTACGGAATGGTCTACAGAGGAACCTTTGGATGACAACAAAGAGGTAGCCATA  
AAGAAGTCCAAAGTAATTAACGATGAATGGAGGGAAGAATTTGTCAATGAGATAATAATC  
TTGTACAGATCAACCAACAGAACATTGTGAGGTTGATAGGATGTTGCCTGGATGTACAT  
GTCCCATGTTGGTCTACGAGTTTGTCTCCAATGGGACCTTGTCTGAGTTCTCCATGGC

OsWAKs-Supplemental Data 1[1].txt

ACTGATCATAGATACCAATCCCCTTGGACATTCGCCTGAAAATAGCCACACAATCAGCA  
GAAGCTCTAGCGTACCTGCACTCATCAACATCTCGCACAATCCTTCATGGGGATTTCAA  
TCGGCCAATATTCTTTTGGATGGTCAGCACAATGCAAAGTTGCAGATTTTGGGGCATCA  
GCGCTGAAGTCCATGAACGAAAGTGAGTTCATCATGTTTGTCCAAGGAACCTTTGGGCTAC  
CTTGACCCGGAGAGCTTCATTAGCCATTGTCTTACCGACAAGAGTGATGTCTACAGTTTT  
GGGGTGGTTCTGCTGGAGCTGATGACAAGAAAGAGGGCAATCTTTGCCAATAGCATCAAT  
GAAAAGGAATCATTGTCCTATTCTTTTCTCTGATGTTTGTATCAGAACATTCACCGGAAT  
ATGCTGGACAGAGAAATTATGGATAAAGAAACCATGGTTGTTCTTGAGAACTTTCCATT  
CTTGCCGCCAACTGCCTGCGACCAAGAGGAGATGACCGGCCAACGATGAAGGAAGTTGCA  
GAGTGCCTACAGATGATAAGGAGACACCCAATGCACGCAGCTAGTGATCACAAAGGAGAC  
AGCTCTGCGCATCACAATATGAAGGATCTTCATCACCATCAATGTCTGCCCATTTTCGAC  
GAAACGATATACAAGAGCATAGAGGCATCCAGATTGGTACAAGATCTTGTGAGATGA

>OsWAK129a gi|37989071|dbj|AK119448.1| Oryza sativa (japonica cultivar-group) cDNA  
clone: 001-133-D05, full insert sequence

ATCGAAGCCATGGCGACCGCGCCGCGCGCTCGACGGCGATGTCCCGCCGAGCACCCAGCCGGCGAGCA  
AGACGGCGCGCCGGCAAGGAGGCGAGCTCCGGTGC GGCCGTGGTGC GCGGAGGAGCAAGTAGAAGGCTC  
CGGAGGCGGCGAACCTGACCGAATGCGTCGCAGGCGTAGCTTCCCCCTTCGTCCCATCGCCGGCGAACAT  
CACCAGATCAGATGAAACTGTACAAGAGGGGGAATTTTCTCTGGATTAGTATTCAATTTCCAGTTTCCC  
ACCAAGTAGGGCAATATCAAGGTTGAATTATCCGTGGCAACTTGCCTGTTTACGTACGCACTCATGATA  
GTTACTGATGGATACATCGTAAATTTACTACTTGAATGGGGACTAGAGGAAATAAATCATAAGAGTGAC  
AGCGCAGGCTGCAGCTTCTTCTGGGTACAGTATGGCGTTGCCAGGTTGCCCTGACAAGTGCGGAAACATT  
TCCATCCCCTACCCTTTTCCGCATCGGCCCCAGCTGTGCTGCAACCAGCATCAGCAGCTACTTCAATCTCA  
CCTGCAACAACACCTTCAACCCACCACGGCCTATGGTTGGGGACTCTGAAGCACTCGTCGAGGTCACTGA  
CATCTCACTGGAGCACGGCGAGATGCGGGTACTCAGCCCTGTCTACTACATCTGCTTCACGGCAAATACC  
ACGTTTACCAGGTTTACCGAAGGGTATGAGCTGAAGCACACACCCTTCTCCCCTCCCCGTACGCAACC  
GCTTCACGGTCATCGGTTGCAACACCCCTGGGGCTCATCGGTGGCTACAAGGGAACCGTGAGCCACTATGT  
GACTGGTTGCTACTCCTATTGTGAGAGCATCAACAGCACATCTGATGGGGCGCCATGTGCAGGGATGGGC  
TGCTGCGAGGCGCCATACCGACTGACCTCACCGCCTGGGGGGCGATGTTTGAGATGAACCAGAGCAAGG  
TATGGAGCTTCAACCCGTGTTTCTATGCCATGGTCAGTGAGGTTGGGTGGTACAGCTTCCAGCAGAAGGA  
CCTTGTTGGCCACCTTGGGTTCTAGATGACAAGAGCTCAGAGGGGAGCACCTGTTGTGGCTGATTGGGC  
CATTAGGAATGGCTCATGCCCGGAAGAGGGGAAAGGCATACCTGGTGATTATGCGTGCATCAGCGCAAAC  
AGCTACTGCATGGACGCGAACAATGGTCCAGGGTACTTATGCCAGTGCTCCAAAGGGTATGAGGCCAACCC  
CTTATCTTCTGAACGGCTGCCAAGACGTGGATGAGTGCGCATTACGTAAGCAGGATCCCAAGTATGAAGA  
TATATATCCTTGCAGGAAAGGAGTCTGCCACAACACACCAGGAGGATATTTATGCAAATGCAAGTTAGGA  
AAAAGATCTGATGGTACAAATTATGGATGTGACCTCTGCGTACTACAGCAGAGCAAGTGGTTATTGGCA  
CCAGTGTTTTCGGCCATTGCGCTAATGGCTTTGACATGCGTGTTGGCCATGCAAATACAAAGGAAAAGGCA  
TAAGAAGGACAAAGATGAGTATTTCAAGCAAAATGGAGGTCTAAAGCTATATGATGAGATGAGATCAAGG  
AAGGTAGACAAATCCGCATACTCACTGAAAAAGATATAAAAAAGGCCACTGACAACTACAGTGAAGATC  
GAGTTCTTGGAAATTGGAGGTACGGAATGGTCTACAGAGGAACCTTGGATGACAACAAAGAGGTAGCCAT  
AAAGAAGTCCAAAGTAATTAACGATGAATGGAGGGAAGAATTTGTCAATGAGATAATAATCTTGTACAG  
ATCAACCACAGAAACATTGTGAGGTTGATAGGATGTTGCCTGGATGTACATGTCCCCATGTTGGTCTACG  
AGTTTGTCTCCAATGGGACCTTGTCTGAGTTCTCCATGGCACTGATCATAGATACCAATCCCCTTGGCA  
CATTCGCCTGAAAAATGCCACACAATCAGCAGAAGCTTAGCGTACCTGCACTCATCAACATCTCGCACA  
ATCCTTCTAGGGGATTTCAAATCGGCCAATATTCTTTGGATGGTCAGCACAATGCAAAGGTTGCAGATT  
TTGGGGCATCAGCGCTGAAGTCCATGAACGAAAGTGAGTTCATCATGTTTGTCCAAGGAACCTTTGGGCTA  
CCTTGACCCGGAGAGCTTCATTAGCCATTGTCTTACCGACAAGAGTGATGTCTACAGTTTTTGGGGTGGTT  
CTGCTGGAGCTGATGACAAGAAAGAGGGCAATCTTTGCCAATAGCATCAATGAAAAGGAATCATTGTCCT  
ATTCCTTTTCTCCTGATGTTTGTATCAGAACATTCACCGGAATATGCTGGACAGAGAAATTATGGATAAAGA  
AACCATGGTTGTTCTTGAGAACTTTCCATTCTTGCCGCCAACTGCCTGCGACCAAGAGGAGATGACCGG  
CCAACGATGAAGGAAGTTGCAGAGTGCCTACAGATGATAAGGAGACACCCAATGCACGCAGCTAGTGATC  
ACAAAGGAGACAGCTCTGCGCATCACAATATGAAGGATCTTCATCACCATCAATGTCTGCCCATTTTCGA  
CGAAACGATATACAAGAGCATAGAGGCATCCAGATTGGTACAAGATCTTGTGAGATGATGGTATGCTTGT  
GCCAGCACTTAATGTGTTAATATCTTGTGTAGATATCATAGTAAATACGGTATAAACCAATTTCTGTAAT  
CCCCTTGTATGAGAAAATTAGCAATTTGTTCCCCGTGGTGATGACTGATGATGAATGCTTCCATTCTGAA  
TAAATATTCAGTTGTACAGAGTCC

>OsWAK129b gi|32972791|dbj|AK062773.1| Oryza sativa (japonica cultivar-group) cDNA  
clone: 001-107-A05, full insert sequence

TAATTAATAGTGAAAAGTTATTTTGAACAAGTCATGAAAGGCAAGTTATAGCATTCTTATAAGTAGAT  
TAGGTTGATTTTGTGTTTACCTATGATAATGAAAGTAAATACAGACTAGCTTACACAAGTTTGTGACTT  
CTGATGTCATTTTGTCTCTGCTTTCAGAGCTGAGTGAGTGCGCATTACGTAAGCAGGATCCCAAGT  
ATGAAGATATATATCCTTGCAGGAAAGGAGTCTGCCACAACACACCAGGAGGATATTTATGCAAATGCAA

OsWAKs-Supplemental Data 1[1].txt

GTTAGGAAAAAGATCTGATGGTACAAATTATGGATGTCGACCTCTGCGTACTACAGCAGAGCAAGTGGTT  
ATTGGCACCAGTGTTCGGCCATTGCGCTAATGGCTTTGACATGCGTGTTGGCCATGCAAATACAAAGGA  
AAAGGCATAAGAAGGACAAAGATGAGTATTTCAAGCAAATGGAGGTCTAAAGCTATATGATGAGATGAG  
ATCAAGGAAGGTAGACACAATCCGCATACTCACTG

>OsWAK129c gi |37988927|dbj |AK119304.1| Oryza sativa (japonica cultivar-group)

cDNA clone: 001-130-F05, full insert sequence

GTCACCTCGCTCAGCACAAGTTTAGACATCTCAATGCTATCTGTCTCATCTCGTCCATTACGCTGCTAACTGT  
CATCTCGTCCAAATGGATGACCACCGATGGTGATCCTCCAAACTTGCCATGGATGTCGCGACTGGTGGCG  
GCGGTTAGCCGCAGCCTGGCGGCTTTGGATCGGCGGCGCAAGAAATCCCAGACTCCTTTCTGCAAGGAT  
ATATATCTTCATACTTGGGATCCTGCTTACGTAATGCGCACTCATCCACGTCTGAAGACAGAGACAAAAA  
GCATGCATTACAGAAGTCAAACCTAACTTGTGTAAGCTAGTCTGTATTACTTTTATTATCATAGGTAACT  
AAAATCAACCTAATCTACTTATAAGAATGCTATAACTTGCCTTTTATGACTTGTTCAAAAATAACTTTTC  
ACTATTTAATTAATAATCCGCAATACAAATGAAGCTGACTGTTTCTTTTCCAGTCCCATGCTGAATTAT  
GCTGGAAACCAAGAGAACTGCTGCCTATTGACTGAAAAATAACTTTTCACTATTTAATTAATAATCCGCA  
CCACAAATGAAGCTGACTGTTTCTTTTCCAGTCCCATGCTGAATTATGCTGGAAACCAAGAGAACTGC  
TGCCTATTGATGAATGTTTATAATATTTTGAAGTATATCTTACACACTCTAGCTGAACAAACACTGAGCA  
CGCCATAGAATTCTACAGTTTTGTTTCTCAAAATCTAAACCAATGGTAAATTTGAACCTAACCTTGGCA  
GCCGTTTCAAGATAAGGGTTGCCCTCATACCCTTTGGAGCACTGGCATAAGTACCCTGGACCATTGTTT  
GCGTCCATGCAGTAGCTGTTTGGCTGATGCACGCATAATCACCAGGTATGCCTTTCCCTCTTCCGGGC  
ATGAGCCATTCTTAATGGCCCAATCAGCCACAACAGGTGCTCCCTCTGAGCTCTGTCTATGTAACCC  
AAGGTGGCAACAAGGTCTTCTGCTGGAAGCTGTACCACCAACCTCACTGACCATGGCATAGAAACAC  
GGGTTGAAGCTCCATACCTTGGTCTGCTGCTTAAACATCGCCCCCAGGCGGTGAGGTGAGTCCGGTA  
TGGCGGCCTCGCAGCAGCCCATCCCTGCACATGGCGCCCCATCAGATGTGCTGTTGATGCTCTCACAATA  
GGAGTAGCAACCAAGTACATAGTGGCTCACGGTTCCCTTGTAGCCACCGATGAGCCCCAGGGTGTGCAA  
CCGATGACCGTGAAGCGGTTGCGTGACGGGGAGGGGAGGAAGGGTGTGTGCTTCAGCTCATACCCTTCGG  
TGAACCTGGTGAACGTGGTATTTGCGGTGAAGCAGATGTAGTAGACAGGGCTGAGTACCCGCATCTCGCC  
GTGCTCCAGTGAGATGTGAGTACCTCGACGAGTGCTTCAGAGTCCCCAACCATAGGCCGTGGTGGGTTG  
AAGGTGTTGTTGCAGGTGAGATTGAAGTAGCTGCTGATGCTGGTTGCAGCACAGCTGGGGCCGATGCCGA  
AAGGGTAGGGGATGGAATGTTTCCGCACTTGTGAGGGCAACCTGGCAACGCCATACTGTACCCAGAAGA  
AGCTGCAGCCTGCGCTGTCACTGCAAGGAAGATGATGCTTGGTATGAGCTTCATTGCAAGGGCTAATGCT  
TCTTGCATGGCTGGGTGCTTTGGGGTCACTTGATCTGGGGTTGTGTAAGTAGCTACACCCGGCTTAATAC  
CATTTACTCAGTGACTTGTATGAAAATTGCATATATACCTATTTTGGGGGAAATATTAAACTGGATAT  
ATCCCTGTTCAATTCTGATGTATATATGCACATGCTAGAAAGGATTAAATAAATATGAAGTAGGTAGTGA  
TTGCAATACATGATGTGAAAATACATCCATCTGCAAATTGCAGAGAAAAATGGAACCGGACTTACCTCT  
TATGATTTATTTCTCTAGTCCCCATTGCAAGTAGTAAATTTACGATGTATCCATCTGCAAATTGCAGAG  
AATAATGAACCCAGACTTGACTCTTATGATTTATTTCTCTGATTCCCATTCACGTTGTAAATTTATGA  
TGTACTATTAGAGAAATTTCAACCATACCACTAATCATGAGTGTTGACGTGAACAGCGCAAGTTGC  
CACGGATAAATCAACCTTGATATTGCCCTACTTGGTGGGAAACTGGAAATTGAATACTAATCCAGAGGAA  
AATTCCTCTTGTACAGTTTCTTTAAGAAAATGGAACCAAAAAACAAATCAGATTTAAATCCATACC  
ATTATTTCTGCGCAGGATGGATGGAGACATGAGAGGGAGAGAGAAAGCAAACCATCTGATCTGGTGT  
GTTCCGCGGCGATGGGACGAAGGGGGAAGCTACGCCTGCGACGCATTGCGTCAGGTTCCGCGCCTCCGGA  
GCCTTCTACTTGCTCCTCCGCGGACACGGCCGACCGGAGCTCGCCTCCTTGCCGGCGCGCGCTTGT  
CTCGCGGCTGGGTGCTGCGGCGGGACATCGCCGTCGACGGCGGCGGCGGTCGCCATGGCTTCGATGG  
GGATCCCGACTTCCCTGAGGCCCATATAAGTTGGGCGAGAACGAGATCTCGATCACGTGCGGCCAATAA  
CAGGATCACACCCTACGCGCGGAATGGACTTTTATGCGGCCCATTTATTATGGGAATGGTACAAGATGG  
TATCCCATTTGGATGGGTTGATACCTGTAAGATATCATCTCGTCTGTATCAGTTGATACCCCAAAAGTA  
TCATCCCGTCCGAACAGGATACCATCTATAGCATTTCCCAAAATAAATAGGTTTTACGATCTATTTTGG  
ACTATAAATTAGTTACGGTTAGTACCTTAGTTCTGCAACTCAAAACAGTAGGAAAACCTGCAAAAGAGA  
ATAAATTGTGACGGCTTGTTCAAGAGTTT
