# Supplementary material for: Evolutionary Expansion, Gene Structure, and Expression of the Rice Wall-Associated Kinase Gene Family
Source: Oxford University Press journal article supplement (doi:10.1104/pp.105.069005), 2005-11-01
Supplement: plphys_v139_3_1107_s1.zip [file plphys_v139_3_1107_s1.zip]

**Supplemental Table 3.** List of 38 *OsWAKs* having FL-cDNA sequence(s) and 11 *OsWAKs* with matching EST sequence(s) and the rice tissues from which FL-cDNA and EST sequences were derived.

| Name                         | FL-cDNA <sup>1</sup> | Tissues             | EST <sup>2</sup> | E-value | Tissues                                                                   |
|------------------------------|----------------------|---------------------|------------------|---------|---------------------------------------------------------------------------|
| OsWAK1 <sup>3</sup>          | AK065470             | Shoot               | C97898 anti      | 0       | Maternal tissue (minus endosperm and embryo)                              |
|                              |                      |                     | AU030772         | 0       | Embryo (micropylar tip)                                                   |
|                              |                      |                     | AU197545 anti    | 0       | Rice callus                                                               |
| OsWAK2 <sup>3</sup>          | AK072170             | Shoot               |                  |         |                                                                           |
| OsWAK4 <sup>3</sup>          | AK064374             | NAA treated callus  |                  |         |                                                                           |
| OsWAK5                       |                      |                     | AU100894         | e-135   | Rice callus                                                               |
|                              |                      |                     | C27886           | e-123   | Maternal tissue (minus endosperm and embryo)                              |
| OsWAK8                       |                      |                     | C24950           | 0       | Green shoot (8 days old)                                                  |
| OsWAK10 <sup>3</sup>         | AK102164             | Callus              | AU082462         | 0       | Callus                                                                    |
|                              | AK100606             | Flower              | C22642           | e-122   | Green shoot (8 days old)                                                  |
|                              | AK066381             | Shoot               | AU174609         | e-114   | Leaf                                                                      |
|                              | AK064656             | Cold treated callus | D48660           | e-113   | Sporophyte                                                                |
|                              |                      |                     | AU174608         | e-111   | Leaf                                                                      |
|                              |                      |                     | AU181399         | e-106   | Callus                                                                    |
| OsWAK11                      | AK100387             |                     | D22099           | 0       | Gametophore                                                               |
| OsWAK12 <sup>3</sup>         | AK111596             |                     |                  |         | shoot                                                                     |
| OsWAK23 <sup>5</sup>         | AK108554             | Shoot and callus    | CA760609         | 0       | Panicles, Water stress was applied by not watering for 4 consecutive days |
| OsWAK21 <sup>3</sup>         | AK119341             |                     | CA758052 anti    | e-174   | Root, 2-3 d 150mM NaCl                                                    |
| OsWAK18 <sup>5</sup>         | AK105477 anti        | Supermi x           |                  |         |                                                                           |
|                              | AK103831 anti        | Callus              |                  |         |                                                                           |
| OsWAK25 <sup>3</sup>         | AK101690             | Callus              | CB640326         | 1.1e-71 | 6 hrs after inoculation with Rice Blast                                   |
| OsWAK28                      | AK120279             | Shoot               | CB631820         |         | 24 hrs after inoculation with Rice Blast                                  |
| OsWAK29                      | AK102639             | Callus              |                  |         |                                                                           |
| OsWAK30/OsWAK31 <sup>4</sup> | AK058435             |                     |                  |         |                                                                           |
| OsWAK32                      | AK067041             | Shoot               | CB676084         |         | 24 hrs after inoculation with Rice Blast                                  |
| OsWAK33 <sup>4</sup>         | AK067467             | Shoot               |                  |         |                                                                           |
| OsWAK35 <sup>5</sup>         | AK108495             | Shoot and callus    | CF322435         |         | Callus                                                                    |
|                              | AK068752             | shoot               |                  |         |                                                                           |
|                              | AK070011             | flower              |                  |         |                                                                           |

|                       |                      |                             |                                                    |                |                                                                                 |
|-----------------------|----------------------|-----------------------------|----------------------------------------------------|----------------|---------------------------------------------------------------------------------|
| OsWAK37 <sup>5</sup>  | AK100568<br>AK111580 | flower<br>Shoot             | CB633484 anti<br>CB633483,<br>CB674990<br>CB632726 | 1.1e-<br>156   | 24 hrs after inoculation with Rice<br>Blast                                     |
| OsWAK38               |                      |                             | CA763211                                           | 1.6e-<br>171   | 24 hrs after inoculation with Rice<br>Blast                                     |
| OsWAK43               |                      |                             | CA763211                                           | 0              | Panicles, Water stress was applied<br>by not watering for 4 consecutive<br>days |
| OsWAK45               |                      |                             | CB628328,<br>CB668831                              | 2.3e-<br>140   | 24 hrs after inoculation with Rice<br>Blast                                     |
| OsWAK46               | AK072627             | Flower                      |                                                    |                |                                                                                 |
| OsWAK50               | AK111730             |                             |                                                    |                | Flower                                                                          |
| OsWAK52 <sup>5</sup>  | AK111909             | Callus                      |                                                    |                |                                                                                 |
| OsWAK53               | AK111508<br>AK111662 | Shoot                       |                                                    |                |                                                                                 |
| OsWAK59 <sup>3</sup>  |                      |                             | BM421232                                           | e-154          | Seedlings induced for HR<br>(hypersensitive response)                           |
| OsWAK60               |                      |                             | BQ909228<br>BM038524                               | e-126<br>e-109 | Seedlings induced for HR<br>(hypersensitive response)                           |
| OsWAK61               |                      |                             | CA755270                                           | e-180          | Roots, 19 h 200mM NaCl                                                          |
| OsWAK72 <sup>3</sup>  | AK069794             | Flower                      | CA756443                                           | 0              | Root, 19 h 200mM NaCl                                                           |
| OsWAK74               |                      |                             | CA763126                                           | 7.1e-<br>124   | Panicles/Water stress                                                           |
| OsWAK76 <sup>3</sup>  | AK067363             | Shoot                       | CB677466,<br>CB628072,                             | 1.0e-<br>153   | 24 hrs after inoculation with Rice<br>Blast                                     |
| OsWAK81 <sup>3</sup>  | AK060211             | Etiolated<br>shoot          |                                                    |                |                                                                                 |
| OsWAK82 <sup>3</sup>  | AK111541             | Shoot                       | AU055937,<br>AU032343                              | 3.7e-94        | Mature leaf/root                                                                |
| OsWAK84 <sup>4</sup>  | AK119296             | Shoot                       |                                                    |                |                                                                                 |
| OsWAK85 <sup>3</sup>  | AK071360             | Flower                      |                                                    |                |                                                                                 |
| OsWAK91               | AK107166             | Panicles<br>(<5cm)          |                                                    |                |                                                                                 |
| OsWAK87               | AK099582             | shoot                       |                                                    |                |                                                                                 |
| OsWAK92               | AK102702             | Callus                      |                                                    |                |                                                                                 |
| OsWAK983              | AK105108             | Etiolated<br>shoot          | BQ908901                                           | 0              | Leaf, induced by M.grisea                                                       |
| OsWAK101 <sup>5</sup> | AK111067             | Supermi<br>x                | BQ908738                                           | e-120          | Leaf, induced by M.grisea                                                       |
| OsWAK112              | AK111815<br>AK111809 | Shoot<br>Shoot              | BI118649<br>CA759266                               | 0<br>e-155     | Panicles, Water stress was applied<br>by not watering for 4 consecutive<br>days |
|                       | AK111496<br>AK111989 | Shoot<br>Etiolated<br>shoot |                                                    |                |                                                                                 |
| OsWAK117 <sup>3</sup> | AK102853             | Callus                      |                                                    |                |                                                                                 |
| OsWAK120              |                      |                             | CB680735                                           | 1.3e-67        | 3-week leaf                                                                     |
| OsWAK123              |                      |                             | D39328                                             | 0              | Root                                                                            |
|                       |                      |                             | C22611                                             | e-119          | Root                                                                            |

|                       |          |                 |                                                                                 |
|-----------------------|----------|-----------------|---------------------------------------------------------------------------------|
|                       | CA759461 | e-113           | Panicles, Water stress was applied<br>by not watering for 4 consecutive<br>days |
| OsWAK124 <sup>4</sup> | AK066290 | Shoot           |                                                                                 |
| OsWAK127 <sup>5</sup> | AK100110 | Flower          |                                                                                 |
|                       | anti     |                 |                                                                                 |
|                       | AK066039 | Shoot           |                                                                                 |
|                       | anti     |                 |                                                                                 |
| OsWAK128              | AK067120 | Shoot           |                                                                                 |
|                       |          | ABA             |                                                                                 |
|                       |          | treated         |                                                                                 |
|                       | AK064574 | callus          |                                                                                 |
| OsWAK129              | AK119448 | <sup>6</sup> Nd |                                                                                 |
|                       |          | Etiolated       |                                                                                 |
|                       | AK062773 | shoot           |                                                                                 |
|                       | AK119304 | Nd              |                                                                                 |
|                       | anti     |                 |                                                                                 |

---

<sup>1</sup> Full-length rice cDNA sequence database of KOME (<http://cdna01.dna.affrc.go.jp/cDNA/>)

<sup>2</sup> EST sequence database in Sputnik (<http://mips.gsf.de/proj/sputnik/oryza/>)

<sup>3</sup> OsWAK-RLCKs

<sup>4</sup> OsWAK-RLPs

<sup>5</sup> Short genes

<sup>6</sup> Nd = no data
