# Supplementary material for: Evolutionary Expansion, Gene Structure, and Expression of the Rice Wall-Associated Kinase Gene Family
Source: Oxford University Press journal article supplement (doi:10.1104/pp.105.069005), 2005-11-01
Supplement: plphys_v139_3_1107_s1.zip [file plphys_v139_3_1107_s1.zip]

**Supplemental Table 1.** Detailed classifications of the 125 *OsWAKs* identified from the genome sequence of rice (*Oryza sativa* L.) ssp. *japonica* cv. Nipponbare and their accession numbers in TIGR/Genbank.

|                               | OsWAK Name/Acc. No (Genbank or TIGR)                                                                                                                                                                                                                                                                                                                                                                                                                                                                                                                                                                                                                                                                                                                                                                                                                                                                                                                                                                                                                                                                                                                                                                                                                                                                                                                                                                                                                                                                                                                                                                                                                                                                                                                                                                                                                                                                                                                                |
|-------------------------------|---------------------------------------------------------------------------------------------------------------------------------------------------------------------------------------------------------------------------------------------------------------------------------------------------------------------------------------------------------------------------------------------------------------------------------------------------------------------------------------------------------------------------------------------------------------------------------------------------------------------------------------------------------------------------------------------------------------------------------------------------------------------------------------------------------------------------------------------------------------------------------------------------------------------------------------------------------------------------------------------------------------------------------------------------------------------------------------------------------------------------------------------------------------------------------------------------------------------------------------------------------------------------------------------------------------------------------------------------------------------------------------------------------------------------------------------------------------------------------------------------------------------------------------------------------------------------------------------------------------------------------------------------------------------------------------------------------------------------------------------------------------------------------------------------------------------------------------------------------------------------------------------------------------------------------------------------------------------|
| <b>OsWAK-RLK (67)</b>         | <sup>2</sup> OsWAK5/P0503E05.16, <sup>2</sup> OsWAK6/P0503E05.28, <sup>2</sup> OsWAK7/8//P0503E05.38, <sup>1</sup> <b>OsWAK11/P0501G04.26</b> , OsWAK13/4362.t00004, OsWAK14/OJ1643_A10.5, OsWAK15/OJ1643_A10.7, OsWAK16/OJ1643_A10.14, OsWAK20/OJ1520_C09.11, OsWAK22/OJ1520_C09.15, OsWAK24/P0016F11.13, <b>OsWAK25/OSJNBa0081P02.15</b> , OsWAK26/4613.t00011, OsWAK27/9631.t04035, <b>OsWAK28/OSJNBa0075M12.12</b> , <b>OsWAK29/B1340F09.9</b> , <b>OsWAK32/OSJNBa0023J03.15</b> , OsWAK34/OSJNBb0032D24.8, OsWAK36/OSJNBa0033H08.8, OsWAK38/OSJNBa0081G05.15, OsWAK39/9632.t02794, OsWAK42/4577.t00017, OsWAK43/OSJNBa0016N04.10, OsWAK44/OSJNBa0016N04.12, OsWAK45/OSJNBa0016N04.13, <sup>2</sup> <b>OsWAK46/OSJNBb0042I07.11</b> , OsWAK47/OSJNBb0076A22.6, <sup>2</sup> <b>OsWAK50/8142.t00001</b> , OsWAK51/OSJNBa0073E02.11, <b>OsWAK53/OSJNBa0093F12.22</b> , OsWAK55/OSJNBb0059K02.19, OsWAK56/2968.t00014, <sup>2</sup> OsWAK57/58//4374.t00003, OsWAK60/4374.t00015, OsWAK61/P0535G04.24, OsWAK63/OSJNBa0033B09.36, OsWAK64/P0018H04.10, OsWAK65/P0018H04.26, <sup>2</sup> OsWAK73/OJ1345_D02.11, OsWAK74/OJ1345_D02.15, OsWAK75/OJ1345_D02.17, OsWAK79/5662.t00009, <sup>2</sup> OsWAK80/OJ1118_B06.13, <sup>2</sup> <b>OsWAK87/9637.t02672</b> , <sup>2</sup> OsWAK89a/P0635G10.14, <sup>2</sup> OsWAK89b/P0635G10.15, OsWAK90/P0635G10.16, <b>OsWAK91/P0635G10.17</b> , <b>OsWAK92/P0635G10.28</b> , OsWAK95/OSJNBb0012A20.9, <sup>2</sup> OsWAK96/97//OSJNBb0012A20.11/12, OsWAK99/OSJNBa0023I19.8, OsWAK103/OSJNBa0028C16.1, OsWAK104/OSJNBa0028C16.5, OsWAK105/OSJNBa0028C16.9, OsWAK106/OSJNBa0011A24.19, OsWAK108/OSJNBa0051J07.1 <sup>2</sup> OsWAK109/110//OSJNBa0051J07.6/7, OsWAK111/OSJNBa0047G15.20, <sup>2</sup> <b>OsWAK112/OSJNBa0095J15.4</b> , OsWAK120/9639.t03169, OsWAK121/9639.t04303, OsWAK122/6324.t00019 OsWAK123/6324.t00020, OsWAK126/5650.t00002, <sup>2</sup> <b>OsWAK128/6563.t00002</b> , <b>OsWAK129/6563.t00003</b> |
| <b>OsWAK-RLCK (28)</b>        | <sup>2</sup> <b>OsWAK1/P0443D08.10</b> , <b>OsWAK2/P0443D08.15</b> , <sup>2</sup> OsWAK3/P0551A11.19, <sup>2</sup> <b>OsWAK4/P0551A11.27</b> , OsWAK9/P0503E05.40, <sup>2</sup> <b>OsWAK10/2884.t00031</b> , <sup>2</sup> <b>OsWAK12/4362.t00002</b> , <sup>2</sup> <b>OsWAK21/OJ1520_C09.13</b> , OsWAK49/OSJNBb0076A22.17, OsWAK59/4374.t00007, <sup>2</sup> OsWAK69/2123.t00006, OsWAK70/2123.t00010, OsWAK71/2123.t00013, <sup>2</sup> <b>OsWAK72/2123.t00019</b> , <sup>2</sup> <b>OsWAK76/OJ1345_D02.20</b> , OsWAK77/OJ1484_G09.121, <sup>2</sup> <b>OsWAK81/OJ1118_B06.15</b> , <sup>2</sup> <b>OsWAK82/OJ1118_B06.17</b> , <b>OsWAK85/OJ1118_B06.25</b> , OsWAK93/OSJNBa0096E22.10, <b>OsWAK98/OSJNBb0012A20.17</b> , OsWAK100/OSJNBa0029P06.11, OsWAK102/OSJNBa0034A02.20, OsWAK114/OSJNBa0093I09.15, OsWAK116/7185.t00001, <b>OsWAK117/7185.t00010</b> , OsWAK118/7185.t00014, OsWAK119/7185.t00017                                                                                                                                                                                                                                                                                                                                                                                                                                                                                                                                                                                                                                                                                                                                                                                                                                                                                                                                                                                                                                                      |
| <b>OsWAK-RLP (13)</b>         | <sup>2</sup> <b>OsWAK30/31//OSJNBa0055H05.4/5</b> , <b>OsWAK33/OSJNBb0032D24.11</b> , OsWAK40/9632.t02799, OsWAK41/OSJNBa0016N04.2, OsWAK48/OSJNBb0076A22.8, OsWAK78/OJ1484_G09.127, <sup>2</sup> <b>OsWAK84/OJ1118_B06.22</b> , OsWAK94/OSJNBa0096E22.11, OsWAK107/OSJNBa0011A24.20, OsWAK113/OSJNBa0093I09.13, OsWAK115/3580.t00004, <sup>2</sup> <b>OsWAK124/4517.t00012</b> , OsWAK125/1894.t00003                                                                                                                                                                                                                                                                                                                                                                                                                                                                                                                                                                                                                                                                                                                                                                                                                                                                                                                                                                                                                                                                                                                                                                                                                                                                                                                                                                                                                                                                                                                                                              |
| <b>OsWAK short genes (12)</b> | OsWAK17/OJ1111_E07.2, <sup>2</sup> <b>OsWAK18/OJ1520_C09.2</b> , OsWAK19/OJ1520_C09.6, <sup>2</sup> <b>OsWAK23/OJ1520_C09.19</b> , <sup>2</sup> <b>OsWAK35/OSJNBa0024J22.12</b> , <sup>2</sup> <b>OsWAK37/9632.t02778</b> , <sup>2</sup> <b>OsWAK52/OSJNBa0093F12.18</b> , OsWAK54/OSJNBb0059K02.18, OsWAK62/OSJNBa0033B09.26, OsWAK67/P0639B07.28, <sup>2</sup> <b>OsWAK101/OSJNBa0034A02.10</b> , <sup>2</sup> <b>OsWAK127/6563.t00001</b>                                                                                                                                                                                                                                                                                                                                                                                                                                                                                                                                                                                                                                                                                                                                                                                                                                                                                                                                                                                                                                                                                                                                                                                                                                                                                                                                                                                                                                                                                                                        |
| <b>OsWAK pseudogene (5)</b>   | OsWAK66/OSJNBa0050F10.15, <sup>2</sup> OsWAK68/P0639B07.28, OsWAK83/OJ1118_B06.19, OsWAK86/OJ1104_G11.11, OsWAK88/P0635G10.10                                                                                                                                                                                                                                                                                                                                                                                                                                                                                                                                                                                                                                                                                                                                                                                                                                                                                                                                                                                                                                                                                                                                                                                                                                                                                                                                                                                                                                                                                                                                                                                                                                                                                                                                                                                                                                       |

<sup>1</sup> OsWAKs in bold have corresponding FL-cDNA sequence(s) available (total=38)

<sup>2</sup> Reannotated either by FL-cDNA sequences or manual assessment (total=37)
