# Supplementary material for: Evolutionary Expansion, Gene Structure, and Expression of the Rice Wall-Associated Kinase Gene Family
Source: Oxford University Press journal article supplement (doi:10.1104/pp.105.069005), 2005-11-01
Supplement: plphys_v139_3_1107_s1.zip [file plphys_v139_3_1107_s1.zip]

Supplemental Data 3. Predicted (partial) protein sequences of ten HvWAKs.

>HvWAK-#22740

VATQLA\*TI HFEHAMVLTMAAI ALLPLLVTLLATAATGLSTRAS\*RTSAW  
SPSRGQCWWRAPRSSSSSTRLPSCRRSTNVVKLHGCCLESEVPLLVEYSV  
SNGTLYGLFNGEQDGRPLPMPWEERLRI AAEI AGALTYLHSAASMSI LRR  
DI KSMNVLLNDSHTAKVSDFGASRSMPVDQTHLVTAVQGTFGYLDPEYYH  
TGRLTEKSDVYSFGVI LVELLMRKKPLVENENGEKQNL SNYFLWAMGERP  
LEEVVDKQVVEEEDMEVVKHVAFLARECLNLRQKRPSMKDVEMRLRFLR  
ARKVALGKDEVAHREVGGDWPGGMVPVAGHLGTRQYSLEQEFASSLRI P  
R\*VFVPG\*HSTVYDVLL\*YTGWS\*\*GS\*SLLSENCWQGD RTI Y

>HvWAK-#14031

AI LSQI I HRNVVKLFGCCLESEVPLLVEYFI SNGTLHDLHI DYTSKCLL  
SWDDRI RI AVEAAGALAYLHSAAAI PI FHRDVKSSNI LLDSSFATKVSDF  
GASRSLSLDETHVVTI VQGTFGYLDPEYYHTGQLTEKSDVYSFGVI LVEL  
LTRRKPI FI NDLGGKQNL SHYFVEGLOEGVMEI MDPEVVKOANPEEI DD  
I CSLAEACLRFKGRDRPTMKEVDMRLQFLRTKRQKCKLFPAGDEVI EPF  
LSPKVGNC DAPMNVNAGNSTSKATSSCYSLEQELSSSI TWPR\*VHMYNT  
TI ASFQVFI \*I I I FFYGF I I CYI VQFKRDYVM\*FCFYI LETFI CSSKK

>HvWAK-TC49839

PGEDLKKATNDFDKGR\*LGMGGHGT VYKGI LKDNRMVAVKRSEI MNVAET  
DEFVQEI I I FSQTNHRNVVRL LGCCLEVEI PI LVYEFI PNGTLFEFI HRS  
YGSPPPSLDTRLKVAQESAEALAYLHLSMNHPI VHGDVKSMMNI LLDENYM  
AKVTDGASRTL PKDAAQFWTLVQGTLSYLDPEYLOERQLTEKSDVYSFG  
VVLLELI TGKTAI YNDGPKEGKSLVWSFLLAMKEETLEDI LDPSI VRAGT  
EKLLREVAELGRMCLGARGEERPSMTQVADRLKALRSTWREELVLDRAVT  
EHMVVHMPVPDAPMPWDLASSSSGAPSTVPYMSGMGI EAPR\*\*SFI \*TFL  
WSSI ARRKCV\*RLRASGFI LSQKCTGSCAVLEVPSM\*VEVGI CCVLCV  
PVWSFP\*HLTCQFLCSFPV\*EFACSVVQLLI RI RFGSEVSSAGTAVI I I L  
NWSNHKLQSKI AI I LQSPRSCAPADTPCXLXNT

>HvWAK-#20521

POG\*GSVHDI GAGHHGLPGP\*VLAGEATHGEERRQLWRCAAGVDHGQDS  
HLPRRPQGRQEPVVL PARDEGWKP\*CHPGCKHS\*RRDGAAGRSRRAGE  
DVLERQG\*RETFHDSRG\*QAEGSAKHLEGETRA\*ERQNRASGHVLLTCSF  
SAS\*SSI DEHGLDWASHVWNKYRNTQVI VSVI I I I YAEVVLPSVCVCTCH  
AWSFKCTI SI CHVFAVSSI M\*KLEFVI TI FMSLVLAHVGYGVFDI HQKKK  
K

>HvWAK-#15923

FCRCDNI LGMLFGYAI TXGKSTRKEKDEYFKQNGGLMLYDEMRSRQVDTV  
RI LTEKEI KI ATDNYNEDRVLGCGGHGMVYKGTLDLREVAI KSKVI DD  
DCRDEFVNEI I I LSQI NHRNI VRL LGCCLDMDVPVLVYEFVSNGTLYEFL  
HGSADHNLLPI PLDLRLKI ATQSAEALAYLHSSTRTI LHGDVKSANI LL  
DDQRHAKVADFGASALKSMDESEFI MLVQGT LGYLDPE SFMSHVLT DKSD  
VYSFGVVLLELMTRKRALYADNSSKEKRSLSHTFLLMFHQNMHL TMLDSE  
I AEDATAMVVAEKVAALAVHCLSTRGDDRPTMKEVAERLQVLCRI QMHQA  
GDGDNDGDFYGGSPLPVVLPSGEVTDGSSET\*ELVLGVCVRV\*FVRVVV  
FVGLLCLWDYLYRAFMFWSKSNFI NFDQVYRENYLHLQYGMSCVGSVF\*  
RCL\*GI GV\*CVCTHSYE\*VYVCMYKRLRLCYVKNI \*MYCVXKHI LV\*S

>HvWAK-TC49517

GGKMVS Y\*GEMGTRPPPPVFNF FFXXXXXXXXXX\*\*TGLLSXARWYDI I \*R  
DEVTAMQCI QNLLRRRI AASH\*QVQ\*RASHWSGRPWNRI QGASQE\*C\*SS  
SQEMHDDRRATQERI RORNADTSPDQPO\*CREAPRGVAWRWKSPMLVSEF  
VSNGALFDLI LGNHGWRI SLATRLGI AHDSAEALSYLHSGASTPI LHGDV  
KSSNI LLDNHNKAKVSDFGASI LAPTDESQFVTLVQGT CGYLDPEYMQTC  
QLTDKSDVYSFGVVLLELLTCKKPFNLDAI GQDKSLSMFMFSAMKENRLE  
VI LDDGI KDEDNMEI LEEI AELAKHCLEMSENRPMSKEVAEKLDRLRKV  
MHPWPVQRNPEEMESLLGEPSAMVHSTI VSDQYFSI EKKAVTNLQSGR\*V  
I APNYFVSKQSI NLYMFVI YFSLTI STVI GLFMVTCI LXLEI GL\*LSSLY

FKFNLM\*IN

>HvWAK-#16619

HGDVKSSNI LLDKDNKAKVADFGASI LAPTDKSQFI TLVHGTCGYLDPEY  
 MQTNLLTDKSDVYSFGVVLELLTGKLPFNFSQDAAAREKSLSMFMYAM  
 KVNKLEEI LDDDI KNEESTE I EEAELAMRCLEMCGDNRPSMKEVADKL  
 DSLRKVMQHPWVQRNPEEMECLLGEPSSMVSSTI TSAEYFSI EKKAVNGL  
 QSGR\*VI TLLLCFVYFVFKSKKSQLHQK\*KTVNCYSYHYVTVHFTNYTST  
 VSVFI WLCI F\*KSVDI CDLLFLKLCKKKKK

>HvWAK-#22701

VQSNLPMPTLQTL LLLLVFHALLAI TAEFGVPSPPPAPAPAEPKTCPAKCGEVEI PYPFG  
 I GTGCSLSDDFALTCNETTSPPTLLTGEAKVASI TLETAQMVVYTHLTYSDDLPI NSTAT  
 RHTTSSMALNVAKPFLSPSENVFTAVGCSLTARI NGRSDI PYLTGCI TTCARVNDTGDD  
 GTPCSGHGCCQASLTPNLTQVSVWEI RRGSPVAENMCQYAFVATKGWYSFSKNDLI GN  
 MTFLTRFGSGPVVPVI LDWAI RDGTCPSVPHGGNSENVSYGACVSTQSYCVNASNGTPGY  
 FCGCSKGYTGPNPYI KNGCTNI NECELRRSANSTI YKNMYPCHEGTCHDTEGDYECKCNLG  
 RKGDGKSAKGCELLVSSAGVAAI GESLFFRS\*RAD\*D\*NLKNNX

>HvWAK-#25256

DTRNQLMLLNMGYMDLEFMI TGRVTOKSEVYSFGAI LLELI TRKENVFDENCI LVTEYRK  
 LYERGKSGRAMFDKEI ASEDEDI FALEEI GKVAI ECLKEDSKERPDMTEVMEQLMMI RRN  
 RRLVOARNKAMTTSGPSV\*WVTI VQSNEKLMN\*KSGYHEGHKFASPCELCKRHHKHKKNS  
 KCFLFR

>HvWAK-#47391

QEGLLTEKSDVYSFGVVI LELI SSRI AI RSEHNSLVKSFLEAHKKQKKATEFFDKEI AI A  
 EDLEFLDSLAVMAVECLRLDVDQRPTMMEVAERLHI LSRSRKVQDVCQ\*AI FAEI LQT\*A  
 AVKVS LGYGKNCYYVF\*CGRMLVRCI CNRI SNVFSVFKKKKKX
