# Supplementary material for: Evolutionary Expansion, Gene Structure, and Expression of the Rice Wall-Associated Kinase Gene Family
Source: Oxford University Press journal article supplement (doi:10.1104/pp.105.069005), 2005-11-01
Supplement: plphys_v139_3_1107_s1.zip [file plphys_v139_3_1107_s1.zip]

**Supplemental Table 4.** Ratios of nonsynonymous vs. synonymous substitution rates of EGF-Ca<sup>++</sup> domain regions among 15 *OsWAKs*. Analysis was conducted using an improved analytical method (Yang and Nielsen, 2000); most ratios are significantly below 1.0 ( $P < 0.01$ ).

[illegible]
