# Supplementary material for: Evolutionary Expansion, Gene Structure, and Expression of the Rice Wall-Associated Kinase Gene Family
Source: Oxford University Press journal article supplement (doi:10.1104/pp.105.069005), 2005-11-01
Supplement: plphys_v139_3_1107_s1.zip [file plphys_v139_3_1107_s1.zip]

**Supplemental Table 2 Detailed annotations of the 125 O**

| Name                                  | Acc. No (TIGR)           |
|---------------------------------------|--------------------------|
| OsWAK1*                               | 2861.t00006              |
| OsWAK2*                               | 2861.t00011              |
| OsWAK3*                               | 4748.t00012              |
|                                       | (4986.t00013)            |
| OsWAK4*                               | 4748.t00014              |
| OsWAK5                                | 2768.t00008 (fused gene) |
| OsWAK6                                | 2768.t00013              |
| <i>OsWAK7#(merged to OsWAK8)</i>      | <i>2768.t00019</i>       |
| OsWAK7/8                              | 2768.t00020              |
| OsWAK9*                               | 2768.t00022              |
| OsWAK10*                              | 2884.t00031              |
| OsWAK11                               | 3783.t00017              |
| OsWAK12*                              | 4362.t00002              |
| OsWAK13                               | 4362.t00004              |
| OsWAK14                               | 2541.t00004              |
| OsWAK15                               | 2541.t00005              |
| OsWAK16                               | 2541.t00008              |
| OsWAK17##                             | 2421.t00020              |
| OsWAK18##                             | 2477.t00020              |
|                                       | (3351.t00001)            |
| OsWAK19##                             | 2477.t00018              |
| OsWAK20                               | 9630.t05379              |
| OsWAK21*                              | 2477.t00014              |
|                                       | (2422.t00016)            |
| OsWAK22                               | 2477.t00012              |
|                                       | (2422.t00014)            |
| OsWAK23##                             | 2477.t00010              |
|                                       | (2422.t00012)            |
| OsWAK24                               | 4897.t00005              |
| OsWAK25                               | 9631.t01093              |
| OsWAK26                               | 4613.t00011              |
| OsWAK27                               | 9631.t04035              |
| OsWAK28                               | 9631.t05834              |
| OsWAK29                               | 9632.t00287              |
| <i>OsWAK30# (merged into OsWak31)</i> | <i>8332.t00008</i>       |
| OsWAK30/31#                           | 8332.t00009              |
| OsWAK32                               | 9632.t02240              |
| OsWAK34                               | 8323.t00010              |
| OsWAK33#                              | 8323.t00013              |
| OsWAK35##                             | 9632.t02248              |
| OsWAK36                               | 5112.t00008              |
| OsWAK37##                             | 9632.t02778              |
| OsWAK38                               | 9632.t02788              |
| OsWAK39                               | 9632.t02794              |
| OsWAK40#                              | 9632.t02799              |
| OsWAK41#                              | 4577.t00022(8273.t00022) |
| OsWAK42                               | 4577.t00017(8273.t00001) |
| OsWAK43                               | 4577.t00014(8273.t00004) |
| OsWAK44                               | 9632.t02820              |
| OsWAK45                               | 9632.t02822              |
| OsWAK46                               | 8278.t00007(4556.t00017) |
| OsWAK47                               | 9632.t02847              |

|                                     |                          |
|-------------------------------------|--------------------------|
| OsWAK48#                            | 9632.t02849              |
| OsWAK49*                            | 5443.t00017              |
| OsWAK50                             | 8142.t00001(5491.t00001  |
| OsWAK51                             | 9632.t04098              |
| OsWAK52##                           | 9632.t04787              |
| OsWAK53                             | 9632.t04791              |
| OsWAK54##                           | 5380.t00019(2960.t00002  |
| OsWAK55                             | 5380.t00020              |
| OsWAK56                             | 2968.t00014              |
| OsWAK57/58                          | 4374.t00003              |
| <i>OsWAK58# (merged to OsWAK57)</i> | <i>4374.t00004</i>       |
| OsWAK59*                            | 4374.t00007              |
| OsWAK60                             | 4374.t00015              |
| OsWAK61                             | 3015.t00018              |
| OsWAK62##                           | 3009.t00005              |
| OsWAK63                             | 3009.t00012              |
| OsWAK64                             | 9634.t04636              |
| OsWAK65                             | 9634.t04645              |
| OsWAK66**                           | 9635.t00670              |
| OsWAK67##                           | 3459.t00011              |
| OsWAK68**                           | 3459.t00009              |
| OsWAK69*                            | 2123.t00006              |
|                                     |                          |
| OsWAK70*                            | 2123.t00010              |
|                                     |                          |
| OsWAK71*                            | 2123.t00013              |
|                                     |                          |
| OsWAK72*                            | 2123.t00019              |
|                                     |                          |
| OsWAK73                             | 9636.t03851(fused gene)  |
| OsWAK74                             | 9636.t03854              |
| OsWAK75                             | 9636.t03855              |
| OsWAK76*                            | 9636.t03857              |
| OsWAK77*                            | 3081.t00013              |
| OsWAK78#                            | 3081.t00017              |
| OsWAK79                             | 5662.t00009              |
| OsWAK80                             | 9637.t02571              |
| OsWAK81*                            | 9637.t01754              |
| OsWAK82*                            | 9637.t02574              |
| OsWAK83**                           | 9637.t02576              |
| OsWAK84#                            | 9637.t02578              |
| OsWAK85*                            | 9637.t02580              |
| OsWAK86**                           | 9637.t01417              |
| OsWAK87                             | 9637.t02672              |
| OsWAK88**                           | 4967.t00009              |
| OsWAK89a                            | nd                       |
| OsWAK89b                            | 9637.t03234 (fused gene) |
| OsWAK90                             | 4967.t00013              |
| OsWAK91                             | 4967.t00014              |
| OsWAK92                             | 9637.t03242              |
| OsWAK93*                            | nd                       |
| OsWAK94#                            | nd                       |
| OsWAK95                             | 3135.t00009              |
| <i>OsWAK96# (merged to OsWAK97)</i> | <i>3135.t00011</i>       |
| OsWAK96/97                          | 3135.t00012              |

|                                       |                          |
|---------------------------------------|--------------------------|
| OsWAK98*                              | 3135.t00019              |
| OsWAK99                               | 3164.t00008              |
| OsWAK100*                             | 3830.t00015              |
|                                       | (gi 16519460)            |
| OsWAK101##                            | 3178.t00010              |
| OsWAK102*                             | 3178.t00025              |
| OsWAK103                              | 3970.t00002              |
|                                       | (3163.t00024)            |
| OsWAK104                              | 3970.t00008              |
| OsWAK105                              | 3970.t00013              |
| OsWAK106                              | gi 19881772              |
| OsWAK107#                             | gi 22711562              |
| OsWAK108                              | gi 19881780              |
| <i>OsWAK109# (merged to OsWAK110)</i> | <i>3650.t00008</i>       |
| OsWAK109/110                          | 3650.t00009              |
| OsWAK111                              | 9638.t00862              |
| OsWAK112                              | 3738.t00007              |
| OsWAK113#                             | 3170.t00013              |
| OsWAK114*                             | 3170.t00015              |
| OsWAK115#                             | 3580.t00004              |
| OsWAK116*                             | 7185.t00001(6649.t0001)  |
| OsWAK117*                             | 7185.t00010(6649.t00010) |
| OsWAK118*                             | 7185.t00014(6649.t00014) |
| OsWAK119*                             | 7185.t00017(6649.t00017) |
| OsWAK120                              | 9639.t03169              |
| OsWAK121                              | 9639.t04303              |
| OsWAK122                              | 6324.t00019              |
| OsWAK123                              | 6324.t00020              |
| OsWAK124#                             | 4517.t00012              |
| OsWAK125#                             | 1894.t00003              |
|                                       | (4434.t00002)            |
| OsWAK126                              | 5650.t00002              |
| OsWAK127##                            | 6563.t00001(7234.t00001) |
| OsWAK128                              | 6563.t00002(7234.t00002) |
| OsWAK129                              | 6563.t00003(7234.t00003) |

**\*OsWAL-RLCK, total=28**

**#OsWAK-RLP, total=13**

**## OsWAK-short gene, total=12**

**\*\*OsWAK-pseudogene, total=5**

**nd=no data**

IsWAKs.

| GenBank ID                                        | BAC                                           |
|---------------------------------------------------|-----------------------------------------------|
| P0443D08.10                                       | P0443D08                                      |
| P0443D08.15                                       | P0443D08                                      |
| P0551A11.19 (pseudo, mis 5' exon)                 | P0551A11                                      |
|                                                   | (OJ1116_C07)                                  |
| P0551A11.27                                       | P0551A11                                      |
| P0503E05.16                                       | P0503E05                                      |
| P0503E05.28 (pseudo, mis 5' exon)                 | P0503E05                                      |
| <i>P0503E05.38 (-5')</i>                          | <i>P0503E05</i>                               |
| P0503E05.38 (-3')                                 | P0503E05                                      |
| P0503E05.40 (pseudo, mis 5' exon)                 | P0503E05                                      |
| nd                                                | P0519D04                                      |
| P0501G04.26                                       | P0501G04                                      |
| nd                                                | P0656G12 (not completed)                      |
| nd                                                | P0656G12 (not completed)                      |
| OJ1643_A10.5                                      | OJ1643_A10                                    |
| OJ1643_A10.7                                      | OJ1643_A10                                    |
| OJ1643_A10.14                                     | OJ1643_A10                                    |
| OJ1111_E07.2 (1854 - 2854)                        | OJ1111_E07                                    |
| OJ1520_C09.2                                      | OJ1520_C09                                    |
|                                                   | (OSJNBa0049O12)                               |
| OJ1520_C09.6 (21993..22307)                       | OJ1520_C09                                    |
| OJ1520_C09.11                                     | <a href="#">OJ1520_C09</a>                    |
| OJ1520_C09.13(46055..48907, stop codon(s) in CDS) | OJ1520_C09                                    |
|                                                   | (OJ1112_G06)                                  |
| OJ1520_C09.15                                     | OJ1520_C09                                    |
|                                                   | (OJ1112_G06)                                  |
| OJ1520_C09.19                                     | OJ1520_C09                                    |
|                                                   | (OJ1112_G06)                                  |
| P0016F11.13                                       | P0016F11                                      |
| OSJNBa0081P02.15                                  | <a href="#">OSJNBa0081P02</a>                 |
| nd                                                | OSJNBa0025B02 (not completed)                 |
| nd                                                | <a href="#">OSJNBa0025B02 (not completed)</a> |
| OSJNBa0075M12.12                                  | <a href="#">OSJNBa0075M12</a>                 |
| B1340F09.9                                        | <a href="#">B1340F09</a>                      |
| <i>OSJNBa0055H05.4</i>                            | <i>OSJNBa0055H05</i>                          |
| OSJNBa0055H05.5                                   | OSJNBa0055H05                                 |
| OSJNBa0023J03.15                                  | <a href="#">OSJNBa0023J03</a>                 |
| OSJNBb0032D24.8                                   | OSJNBb0032D24                                 |
| OSJNBb0032D24.11                                  | OSJNBb0032D24                                 |
| OSJNBa0024J22.12                                  | <a href="#">OSJNBa0024J22</a>                 |
| OSJNBa0033H08.8                                   | OSJNBa0033H08                                 |
| nd                                                | <a href="#">OSJNBa0081G05</a>                 |
| OSJNBa0081G05.15                                  | <a href="#">OSJNBa0081G05</a>                 |
| nd                                                | <a href="#">OSJNBa0049H08</a>                 |
| nd                                                | <a href="#">OSJNBa0049H08</a>                 |
| OSJNBa0016N04.2                                   | OSJNBa0016N04                                 |
| nd                                                | OSJNBa0016N04                                 |
| OSJNBa0016N04.10                                  | OSJNBa0016N04                                 |
| OSJNBa0016N04.12                                  | <a href="#">OSJNBa0016N04</a>                 |
| OSJNBa0016N04.13                                  | <a href="#">OSJNBa0016N04</a>                 |
| OSJNBb0042I07.11                                  | OSJNBb0042I07                                 |
| OSJNBb0076A22.6                                   | <a href="#">OSJNBb0076A22</a>                 |

|                                                 |                                            |
|-------------------------------------------------|--------------------------------------------|
| OSJNBb0076A22.8                                 | <a href="#">OSJNBb0076A22</a>              |
| OSJNBb0076A22.17                                | OSJNBb0076A22                              |
| nd                                              | OSJNBa0083N12                              |
| OSJNBa0073E02.11                                | <a href="#">OSJNBa0073E02</a>              |
| OSJNBa0093F12.18                                | <a href="#">OSJNBa0093F12</a>              |
| OSJNBa0093F12.22                                | <a href="#">OSJNBa0093F12</a>              |
| OSJNBb0059K02.18                                | OSJNBb0059K02                              |
| OSJNBb0059K02.19                                | OSJNBb0059K02                              |
| nd                                              | P0519E07                                   |
| nd                                              | OJ1480_H01 (not completed)                 |
| nd                                              | <i>OJ1480_H01 (not completed)</i>          |
| nd                                              | OJ1480_H01 (not completed)                 |
| nd                                              | OJ1480_H01 (not completed)                 |
| P0535G04.24                                     | P0535G04                                   |
| OSJNBa0033B09.26                                | OSJNBa0033B09                              |
| OSJNBa0033B09.36                                | OSJNBa0033B09                              |
| P0018H04.10                                     | <a href="#">P0018H04</a>                   |
| P0018H04.26                                     | <a href="#">P0018H04</a>                   |
| OSJNBa0050F10.15 (pseudo, stop codon(s) in CDS) | <a href="#">OSJNBa0050F10</a>              |
| P0639B07.28 (pseudo)                            | P0639B07                                   |
| P0639B07.28 (pseudo, stop codon(s) in CDS)      | P0639B07                                   |
| nd                                              | OJ2096_F11                                 |
|                                                 | (OJ1058_B11)                               |
| nd                                              | OJ2096_F11                                 |
| (gi 29243363)                                   | (OJ1058_B11)                               |
| nd                                              | OJ2096_F11                                 |
| (gi 22202753)                                   | (P0038F10)                                 |
| nd                                              | OJ2096_F11                                 |
| (gi 22202747)                                   | (P0038F10)                                 |
| OJ1345_D02.11                                   | <a href="#">OJ1345_D02</a>                 |
| OJ1345_D02.15                                   | <a href="#">OJ1345_D02</a>                 |
| OJ1345_D02.17                                   | <a href="#">OJ1345_D02</a>                 |
| OJ1345_D02.20 (pseudo, stop codon(s))           | <a href="#">OJ1345_D02</a>                 |
| OJ1484_G09.121                                  | OJ1484_G09                                 |
| OJ1484_G09.127                                  | OJ1484_G09                                 |
| nd                                              | P0684H11 (not completed)                   |
| OJ1118_B06.13 (pseudo, mis 5' exon)             | <a href="#">OJ1118_B06</a>                 |
| OJ1118_B06.15                                   | OJ1118_B06                                 |
| OJ1118_B06.17 (pseudo, stop codon(s))           | <a href="#">OJ1118_B06</a>                 |
| OJ1118_B06.19 (pseudo, frameshift(s))           | <a href="#">OJ1118_B06</a>                 |
| OJ1118_B06.22(pseudo, stop codon(s))            | <a href="#">OJ1118_B06</a>                 |
| OJ1118_B06.25                                   | <a href="#">OJ1118_B06</a>                 |
| OJ1104_G11.11 (pseudo, stop codon(s))           | <a href="#">OJ1104_G11</a>                 |
| nd                                              | <a href="#">OJ1011_C06 (not completed)</a> |
| P0635G10.10 (pseudo, stop codon(s))             | P0635G10                                   |
| P0635G10.14                                     |                                            |
| P0635G10.15                                     | <a href="#">P0635G10</a>                   |
| P0635G10.16                                     | P0635G10                                   |
| P0635G10.17                                     | P0635G10                                   |
| P0635G10.28                                     | <a href="#">P0635G10</a>                   |
| OSJNBa0096E22.10                                | OSJNBa0096E22                              |
| OSJNBa0096E22.11                                | OSJNBa0096E22                              |
| OSJNBb0012A20.9                                 | OSJNBb0012A20                              |
| <i>OSJNBb0012A20.11</i>                         | <i>OSJNBb0012A20</i>                       |
| OSJNBb0012A20.12                                | OSJNBb0012A20                              |

|                                    |                               |
|------------------------------------|-------------------------------|
| OSJNBb0012A20.17                   | OSJNBb0012A20                 |
| OSJNBa0023I19.8                    | OSJNBa0023I19                 |
| OSJNAa0029P06.11                   | OSJNAa0029P06                 |
|                                    | (OSJNBa0034A02)               |
| OSJNBa0034A02.10                   | OSJNBa0034A02                 |
| OSJNBa0034A02.20                   | OSJNBa0034A02                 |
| OSJNBa0028C16.1                    | OSJNBa0028C16                 |
|                                    | (OSJNBa0031A07)               |
| OSJNBa0028C16.5                    | OSJNBa0028C16                 |
| OSJNBa0028C16.9                    | OSJNBa0028C16                 |
| OSJNBa0011A24.19                   | OSJNBa0011A24                 |
| OSJNBa0011A24.20                   | OSJNBa0011A24                 |
| OSJNBa0051J07.1(shorter, 226-2295) | OSJNBa0051J07                 |
| <i>OSJNBa0051J07.6</i>             | <i>OSJNBa0051J07</i>          |
| OSJNBa0051J07.7                    | OSJNBa0051J07                 |
| OSJNBa0047G15.20                   | <a href="#">OSJNBa0047G15</a> |
| OSJNBa0095J15.4                    | OSJNBa0095J15                 |
| OSJNBa0093I09.13                   | OSJNBa0093I09                 |
| OSJNBa0093I09.15                   | OSJNBa0093I09                 |
| nd                                 | OSJNBb0083E23 (not completed) |
| nd                                 | OSJNBb0084M23                 |
| nd                                 | <a href="#">OSJNBa0018K14</a> |
| nd                                 | <a href="#">OSJNBa0004Q15</a> |
| LOC_Os11g47150                     | OSJNBa0059H21                 |
| LOC_Os11g47140                     | OSJNBa0059H21                 |
| nd                                 | OSJNBb0077C18                 |
| nd                                 | OSJNBa0005P03                 |
|                                    | (OSJNBa0090O14)               |
| nd                                 | OJ1327_A12                    |
| nd                                 | OJ1388_B05                    |
| nd                                 | OJ1388_B05                    |
| nd                                 | OJ1388_B05                    |

| Position on BAC             | BAC Acc. No              | Chr. No. | Correction from FL-cDNA                   |
|-----------------------------|--------------------------|----------|-------------------------------------------|
| 29030-19425 (23981-19682)   | AP003250                 | 1        | cDNA longer (5' extention)                |
| 43923-39223                 | AP003250                 | 1        | matched                                   |
| 77487-81898                 | AP003934                 | 1        |                                           |
|                             | (AP004253)               |          |                                           |
| 99485-103742 (94340-        | AP003934                 | 1        | cDNA shorter (cut 5' start, extra intron) |
| 44067-47190 (28886-47190)   | AP003021                 | 1        |                                           |
| 77193-75021                 | AP003021                 | 1        |                                           |
| 111799-112866               | AP003021                 | 1        |                                           |
| 111799(115670)-117901       | AP003021                 | 1        |                                           |
| 124344-122808               | AP003021                 | 1        |                                           |
| 193004-191559               | AP003455                 | 1        | (cDNA longer, recoverd the 3' end )       |
| 108547-105878               | AP004752                 | 2        | cDNA matched                              |
| 20165-17788                 | AP005070                 | 2        | cDNA matched but not protein              |
| 30216-27751                 | AP005070                 | 2        |                                           |
| 25753-22627                 | AP004192                 | 2        |                                           |
| 34166-30901                 | AP004192                 | 2        |                                           |
| 52048-48847                 | AP004192                 | 2        |                                           |
| 1854-3733                   | AP003994                 | 2        |                                           |
| 15203-12718                 | AP004064                 | 2        | matched, but not proteins, anti           |
|                             | (AC069158)               |          |                                           |
| 22648-21993                 | AP004064                 | 2        |                                           |
| 42012-39144                 | <a href="#">AP004064</a> | 2        |                                           |
| 48881-44565                 | AP004064                 | 2        | cDNA shorter (3'-end)                     |
|                             | (AP003996)               |          |                                           |
| 63712-60989                 | AP004064                 | 2        |                                           |
|                             | (AP003996)               |          |                                           |
| 74709 - 83041 (74719-79628) | AP004064                 | 2        | cDNA longer (3' extend, exon missed)      |
|                             | (AP003996)               |          |                                           |
| 57207-59700                 | AP005303                 | 2        |                                           |
| 100827-105080               | <a href="#">AC107226</a> | 3        | matched                                   |
| 126529-117196               | AL732379                 | 3        |                                           |
| 82983-78747                 | <a href="#">AL732379</a> | 3        |                                           |
| 62180-57804 (61107-57899)   | <a href="#">AC096856</a> | 3        | matched                                   |
| 53321-57380                 | <a href="#">BX842608</a> | 4        | matched                                   |
| 28387-34847                 | <a href="#">AL606601</a> | 4        | matched                                   |
| 28387 (36556)-40633         | AL606601                 | 4        | matched                                   |
| 129368-133960               | <a href="#">AL731597</a> | 4        | matched                                   |
| 69376-74582                 | AL662995                 | 4        |                                           |
| 90512-95401                 | AL662995                 | 4        | matched                                   |
| 90137 -91364 (85900-90993)  | <a href="#">AL731596</a> | 4        | cDNA shorer ( 5' start short)             |
| 64045-59431                 | AL662942                 | 4        |                                           |
| 75899-80668                 | <a href="#">AL662983</a> | 4        | matched                                   |
| 162320-158764               | <a href="#">AL662983</a> | 4        |                                           |
| 110041-104375               | <a href="#">AL663020</a> | 4        |                                           |
| 139049-134781               | <a href="#">AL663020</a> | 4        |                                           |
| 25499-22922                 | AL731587                 | 4        |                                           |
| 57162-52968                 | AL731587                 | 4        |                                           |
| 84068-81422                 | AL731587                 | 4        |                                           |
| 98483-95065                 | <a href="#">AL731587</a> | 4        |                                           |
| 116721-113211               | <a href="#">AL731587</a> | 4        |                                           |
| 105778-101749               | AL731632                 | 4        | cDNA longer (exon missed)                 |
| 37847-34496                 | <a href="#">AL663016</a> | 4        |                                           |

|                            |                          |    |                                           |
|----------------------------|--------------------------|----|-------------------------------------------|
| 57103-51171                | <a href="#">AL663016</a> | 4  |                                           |
| 94477-99188                | AL663016                 | 4  |                                           |
| 1562-63 (BAC end)          | AL606683                 | 4  | cDNA longer and recovered the 3' end      |
| 79137-75746                | <a href="#">AL731616</a> | 4  |                                           |
| 126286-130997 (126518-1305 | <a href="#">AL607004</a> | 4  | cDNA longer and anti (5' and 3' extend )  |
| 153330-150959              | <a href="#">AL607004</a> | 4  | matched                                   |
| 102360-103436              | AL606692                 | 4  |                                           |
| 109170-112678              | AL606692                 | 4  |                                           |
| 90068-85952                | AC087552                 | 5  |                                           |
| 27676(23550)-18839         | AC118287                 | 5  |                                           |
| 28883-27676(91-1298)       | <i>AC118287</i>          | 5  |                                           |
| 43129-46013                | AC118287                 | 5  |                                           |
| 95940-102715               | AC118287                 | 5  |                                           |
| 87655-91449                | AP000399                 | 6  |                                           |
| 93099-92809                | AP002864                 | 6  |                                           |
| 133724-130826              | AP002864                 | 6  |                                           |
| 42150-38060                | <a href="#">AP003761</a> | 6  |                                           |
| 102818-97220               | <a href="#">AP003761</a> | 6  |                                           |
| 66670-68825                | <a href="#">AP005840</a> | 7  |                                           |
| 75663-76286                | AP004344                 | 7  |                                           |
| 82978-85520                | AP004344                 | 7  |                                           |
| 40250-35292                | AP003964                 | 7  | cDNA is a Pack-Mule anti, OsWAK after the |
|                            | (AP003864)               |    |                                           |
| 57853-56185                | AP003964                 | 7  |                                           |
|                            | (AP003864)               |    |                                           |
| 76209-74449                | AP003964                 | 7  |                                           |
|                            | (AP004266)               |    |                                           |
| 120396-116283 (119010-     | AP003964                 | 7  | cDNA longer (5' extend )                  |
|                            | (AP004266)               |    |                                           |
| 43613-48894(52058-35363)   | <a href="#">AP003892</a> | 8  |                                           |
| 64449-60887                | <a href="#">AP003892</a> | 8  |                                           |
| 66520-69304                | <a href="#">AP003892</a> | 8  |                                           |
| 74129-79407                | <a href="#">AP003892</a> | 8  | cDNA longer                               |
| 59862-58825                | AP003913                 | 8  |                                           |
| 81555-79365                | AP003913                 | 8  |                                           |
| 147851-151854              | AP005427                 | 9  |                                           |
| 50203-46104                | <a href="#">AP005555</a> | 9  |                                           |
| 58953-57452 (61603-57621)  | AP005555                 | 9  | cDNA shorter (5'-end)                     |
| 67431-64801                | <a href="#">AP005555</a> | 9  | cDNA longer                               |
| 75558-72891                | <a href="#">AP005555</a> | 9  |                                           |
| 83345-92781 (85776-83616)  | <a href="#">AP005555</a> | 9  | cDNA longer                               |
| 104145-98899               | <a href="#">AP005555</a> | 9  | matched                                   |
| 36704-33386                | <a href="#">AP005091</a> | 9  |                                           |
| 88281-84606                | <a href="#">AP005677</a> | 9  | cDNA longer                               |
| 33080-36255                | AP005396                 | 9  |                                           |
| 43653..46192               |                          |    |                                           |
| 48171..50849               | <a href="#">AP005396</a> | 9  |                                           |
| 52334-55161                | AP005396                 | 9  |                                           |
| 56434..59421               | AP005396                 | 9  | matched                                   |
| 89468-92031                | <a href="#">AP005396</a> | 9  | matched                                   |
| 67851-70996                | AC099400                 | 10 |                                           |
| 78489-80103                | AC099400                 | 10 |                                           |
| 52624-59233                | AC079685                 | 10 |                                           |
| 76115-77068                | AC079685                 | 10 |                                           |
| 76115(78565)-81749         | AC079685                 | 10 |                                           |



|                           |                          |    |                               |
|---------------------------|--------------------------|----|-------------------------------|
| 105973-111450             | AC079685                 | 10 | matched                       |
| 43539-46700               | AC079037                 | 10 |                               |
| 68179-68661               | AC112513                 | 10 |                               |
|                           | (AC079852)               |    |                               |
| 78800-76602 (74404-78523) | AC079852                 | 10 | cDNA shorter and anti         |
| 144200-146152             | AC079852                 | 10 |                               |
| 9577-14188                | AC098565                 | 10 |                               |
|                           | (AC084884)               |    |                               |
| 39237-46086               | AC098565                 | 10 |                               |
| 70660-75822               | AC098565                 | 10 |                               |
| 113786-116932             | AC113336                 | 10 |                               |
| 119419-120907             | AC113336                 | 10 |                               |
|                           | AC098566                 | 10 |                               |
| 35194-36318               | AC098566                 | 10 |                               |
| 35194(39770)-42862        | AC098566                 | 10 |                               |
| 98240-104974              | <a href="#">AC083944</a> | 10 |                               |
| 60487-67045               | AC092173                 | 10 | cDNA longer                   |
| 46709-47620               | AC090486                 | 10 |                               |
| 61050-62225               | AC090486                 | 10 |                               |
| 11963-14153               | AC105745                 | 10 |                               |
| 1788-419                  | AC137753                 | 11 |                               |
| 64018-62015               | AC137753                 | 11 | matched                       |
| 78947-78270               | AC137753                 | 11 |                               |
| 96403-94418               | AC137753                 | 11 |                               |
| 138918-136918             | <a href="#">AC120889</a> | 11 |                               |
| 24055-17803               | <a href="#">AC146937</a> | 11 |                               |
| 103897-99596              | AC116367                 | 11 |                               |
| 112425-106986             | AC116367                 | 11 |                               |
| 62941-59901               | AL731874                 | 12 | cDNA shorter (3'-end)         |
| 11222-12929               | AL513002                 | 12 |                               |
|                           | (AL731763)               |    |                               |
| 4758-1914                 | AL713940                 | 12 |                               |
| 6852-9756                 | BX000457                 | 12 | matched but UTR longer, anti  |
| 12461-14450 (11526-14247) | BX000457                 | 12 | cDNA shorter (5' start short) |
| 18346-21342               | BX000457                 | 12 | matched (both sense and anti) |

| intron (coding region) | Note                                |  |  |  |  |
|------------------------|-------------------------------------|--|--|--|--|
| 3                      |                                     |  |  |  |  |
| 3                      |                                     |  |  |  |  |
| 4                      | (OsWAK-RLCK type gene)              |  |  |  |  |
|                        |                                     |  |  |  |  |
| 3                      |                                     |  |  |  |  |
| 2                      |                                     |  |  |  |  |
| 0                      | shorter 5' region, but have EGF     |  |  |  |  |
| 0                      | (60% to OsWAK5)                     |  |  |  |  |
| 1                      | (84 % to OsWAK5)                    |  |  |  |  |
| 1                      | (78% to OsWAK6 )                    |  |  |  |  |
| 0,2,4                  | (on BAC end, intact gene recovered) |  |  |  |  |
| 2                      |                                     |  |  |  |  |
| 3                      |                                     |  |  |  |  |
| 2                      |                                     |  |  |  |  |
| 2                      |                                     |  |  |  |  |
| 2                      |                                     |  |  |  |  |
| 2                      |                                     |  |  |  |  |
| 2                      |                                     |  |  |  |  |
| 2                      | (48% to the end of OsWAK53b)        |  |  |  |  |
| 0,0                    | (not to any OsWAK)                  |  |  |  |  |
|                        |                                     |  |  |  |  |
| 0                      | (50% to OsWAK22)                    |  |  |  |  |
| 2                      |                                     |  |  |  |  |
| 3                      |                                     |  |  |  |  |
|                        |                                     |  |  |  |  |
| 3                      |                                     |  |  |  |  |
|                        |                                     |  |  |  |  |
| 0                      | (52% to OsWAK21)                    |  |  |  |  |
|                        |                                     |  |  |  |  |
| 2                      |                                     |  |  |  |  |
| 2                      |                                     |  |  |  |  |
| >3                     |                                     |  |  |  |  |
| 2                      |                                     |  |  |  |  |
| 3                      |                                     |  |  |  |  |
| 3                      |                                     |  |  |  |  |
| 2                      | AK058435 (FL-cDNA)                  |  |  |  |  |
| 2                      | AK058435 (FL-cDNA)                  |  |  |  |  |
| 1                      |                                     |  |  |  |  |
| 5                      |                                     |  |  |  |  |
| 3                      |                                     |  |  |  |  |
| 0                      | (49% to the end of OsWAK112a)       |  |  |  |  |
| 4                      |                                     |  |  |  |  |
| 1                      | (very short, not to any OsWAK)      |  |  |  |  |
| 2                      |                                     |  |  |  |  |
| 3                      |                                     |  |  |  |  |
| 2                      | (65% to OsWAK33, EGF)               |  |  |  |  |
| 2                      | (40% to OsWAK33, EGF)               |  |  |  |  |
| 4                      |                                     |  |  |  |  |
| 2                      |                                     |  |  |  |  |
| 2                      |                                     |  |  |  |  |
| 3                      |                                     |  |  |  |  |
| 2                      |                                     |  |  |  |  |
| 3 (ex)                 |                                     |  |  |  |  |

|     |                                  |  |  |  |  |
|-----|----------------------------------|--|--|--|--|
| 4   | (61% to OsWAK43, EGF)            |  |  |  |  |
| 1   | (75% to OsWAK43)                 |  |  |  |  |
| 1   | (42% To OsWAK53a, EGF)           |  |  |  |  |
| 2   |                                  |  |  |  |  |
| 0   | (very short, to none OsWAK)      |  |  |  |  |
| 0,2 |                                  |  |  |  |  |
| 0   | (35% to OsWAK55, EGF start)      |  |  |  |  |
| 3   |                                  |  |  |  |  |
| 1   |                                  |  |  |  |  |
| 1   | (72% to OsWAK45)                 |  |  |  |  |
| 1   | 44% to OsWAK45                   |  |  |  |  |
| 2   | (48% to OsWAK48)                 |  |  |  |  |
| 4   |                                  |  |  |  |  |
| 3   |                                  |  |  |  |  |
| 0   | (92% to the end of OsWAK63)      |  |  |  |  |
| 3   |                                  |  |  |  |  |
| 2   |                                  |  |  |  |  |
| 4   |                                  |  |  |  |  |
| 3   |                                  |  |  |  |  |
|     | ( 68 % to OsWAK105)              |  |  |  |  |
| 1   |                                  |  |  |  |  |
| 0   | (98% to OsWAK94)                 |  |  |  |  |
|     |                                  |  |  |  |  |
| 1   |                                  |  |  |  |  |
|     |                                  |  |  |  |  |
| 1   |                                  |  |  |  |  |
|     |                                  |  |  |  |  |
| 0   |                                  |  |  |  |  |
|     |                                  |  |  |  |  |
| 5   |                                  |  |  |  |  |
| 2   |                                  |  |  |  |  |
| 2   |                                  |  |  |  |  |
| 0   | OsWAK-RLCK gene (79% to OsWAK74) |  |  |  |  |
| 0   | (60% to OsWAK20)                 |  |  |  |  |
| 2   | (41% to OsWAK20)                 |  |  |  |  |
| 5   |                                  |  |  |  |  |
| 4   | missed 5' region recovered       |  |  |  |  |
| 0   | (66% to OsWAK80)                 |  |  |  |  |
| 0   | (81% to OsWAK83 )                |  |  |  |  |
| 4   |                                  |  |  |  |  |
| 2   | (51% to OsWAK80, EGF)            |  |  |  |  |
| 0   | (74% to OsWAK80)                 |  |  |  |  |
| 5   |                                  |  |  |  |  |
| 1   |                                  |  |  |  |  |
| 3   |                                  |  |  |  |  |
| 1   |                                  |  |  |  |  |
| 2   |                                  |  |  |  |  |
| 1   |                                  |  |  |  |  |
| 1   |                                  |  |  |  |  |
| 2   |                                  |  |  |  |  |
| 4   | (80% to OsWAK105 )               |  |  |  |  |
| 0   | (70% to OsWAK105)                |  |  |  |  |
| 3   |                                  |  |  |  |  |
| 0   | (77% to OsWAK95)                 |  |  |  |  |
| 2   | (77% To OsWAK95)                 |  |  |  |  |

|       |                                             |  |  |  |  |
|-------|---------------------------------------------|--|--|--|--|
| 0     | (47% to OsWAK119)                           |  |  |  |  |
| 2     |                                             |  |  |  |  |
| 0     | (65% to OsWAK116)                           |  |  |  |  |
|       |                                             |  |  |  |  |
| 0     | (very short, similar to the end of OsWAK28) |  |  |  |  |
| 0     | (41% to OsWAK119)                           |  |  |  |  |
| 2     |                                             |  |  |  |  |
|       |                                             |  |  |  |  |
| 2     |                                             |  |  |  |  |
| 2     |                                             |  |  |  |  |
| 2     | (43% to OsWAK108)                           |  |  |  |  |
| 1     | (38% to OsWAK108)                           |  |  |  |  |
| 3     |                                             |  |  |  |  |
| 1     | 37% to OsWAK108                             |  |  |  |  |
| 3     | 61% to OsWAK108                             |  |  |  |  |
| 3     |                                             |  |  |  |  |
| 1,2,3 |                                             |  |  |  |  |
| 0     | (55% to OsWAK105)                           |  |  |  |  |
| 1     | (82% to OsWAK105)                           |  |  |  |  |
| 2     | (85% to OsWAK78, EGF)                       |  |  |  |  |
| 0     |                                             |  |  |  |  |
| 1     |                                             |  |  |  |  |
| 0     |                                             |  |  |  |  |
| 0     |                                             |  |  |  |  |
| 2     |                                             |  |  |  |  |
| 4     |                                             |  |  |  |  |
| 4     |                                             |  |  |  |  |
| 3     |                                             |  |  |  |  |
| 2     | (48% to OsWAK88, EGF)                       |  |  |  |  |
| 2     | (42% to OsWAK89, EGF)                       |  |  |  |  |
|       |                                             |  |  |  |  |
| 2     |                                             |  |  |  |  |
| 0,2   | (very short, but 42 % to OsWAK26)           |  |  |  |  |
| 0,1   |                                             |  |  |  |  |
| 0,2   |                                             |  |  |  |  |

[illegible]

[illegible]

[illegible]
