# Supplementary material for: Evolutionary Expansion, Gene Structure, and Expression of the Rice Wall-Associated Kinase Gene Family
Source: Oxford University Press journal article supplement (doi:10.1104/pp.105.069005), 2005-11-01
Supplement: plphys_v139_3_1107_s1.zip [file plphys_v139_3_1107_s1.zip]

## Supplemental Data 2. Predicted protein sequences of the 125 OsWAKs.

>OsWAK1, AK065470, Chromosome 1, protein sequence  
 MHPTLLCLPLLASLLLLCHRRARAECEPATCGNLTVRYPFWLGGPNFNQSNQSSPSSALAS  
 CGHPAFEVWCNGGVASLRGSQI LVLSI DYNSSSFVAHKRVADGGDGVCRDTFNI SSSLA  
 LSPFTI SSSNRAI CFLYSCNGTEPPEI DGLVNATI SSCSKPI YAYLGGI YDRDNPPAI KA  
 GNCTYSYLPVLWPDSPANL TAGTNYSPOFKKGFVLEWQKNGFGDCDACNGSGGQCRYI ND  
 SAAAFACLCSDGKLRRSTCPGSRKSHI I GI ACGSSGGI LLI VSI FI FAWHKRKKRKQTR  
 DLKDLMHSSSSMQSYSKDLELGGSPHI FTYEELEEATAGFSASRELGDGGFGTVYKGLR  
 DGRVAVKRLYKNNYRRVEQFLNEVDI LSRLHQLNVI LYGCTSRSSRDLLLVEYI PNG  
 TVADHLHGPRAGERGLTWPVRMTI AI ETAEALAYLHAVEI I HRDVKTNNI LLDNNFHVKV  
 ADFGLSRLFPLEVTHVSTVPQGTGPYVDPVYHOCYKLTDKSDVYSFGVLI ELI SSKPAV  
 DMSRSHSDI NLANMALNRI QNHEVDQLVDPEI GYETDSETKRMVDLVAELAFQCLQMDRE  
 SRPPI KEVVEVLNCI KNGECPAEKMNKNASPKEDSHLLKDSLOQSPDSVI HRFHSQSTNH  
 SVASNSSG

>OsWAK2, AK072170, Chromosome 1, protein sequence  
 MHPALLLLPLASLLHAAAAI GHNETSTSGNTSCTPARCGNLT I SYPFSLSGVQPVSCGY  
 VLDLTCDNRTGRAFLSRTFRDHLFRVDSI FYENNSLVAAVETTFAGDADCPVPDFNVTSS  
 LSPYPI I SNTNKYLAFI YDCSI PEHVGLQORPCGNRTMGAYI SDKWNSTPPSGVRGNCN  
 SVSVPVRGYDGMKPVSGHYEQLI KDGFVLEWMRSVMGDQDCDGCRRRGGEQFELSFO  
 CFCPDGLLCSNSTRNTTSSHPSGKVNRI KI AAGTAAAVVCLGI LGVGSTVLYTRRKRK  
 RSASFGLI HGGTPLPSLTKEFSLAGLAYTHI FTYEELDEATDGFSDARELGVGFGTVY  
 KGI LRNGDTVAVKRLYKNSYKSVEQFQNEVGI LSRLRHPNLVTLFGCTSQTNSRDLLLVI  
 EFVPNGTLADHLHGGAARSSSLDWPTRLGI AVETASALEYLHTVEPQVVRDVKTN I L  
 LDEGFHVKVADFGLSRLFPADATHVSTAPQGTGPYLDPMYHOCYQLTDKSDVYSFGVLI  
 ELI SSKPAVDMNRRGGDVNLANMAVHMI QSYEMEQLVDPQLGYASDGETRRTVDLVAEVA  
 FRCLQPEQDVRPPI GEVLDALEAQRMDKVGKDDAGLVKKSRDGPDCVMYQWI SPST  
 TSNSS

>OsWAK3, 4748.t00012, Chromosome 1, protein sequence  
 MESVCACAWPTAPTVALFATGYEEGVAEAPHDVPMTNGHVVFQVENNCSLRYFTEN  
 EI ROI TRGYI LLGKGSFGKVYKGMLDGRCPVAVKRYI HGTRKEEFAKEVI VHSQI NHKN  
 VVRLGCGCTEENALMI VMEFI CNGNLNDI LHCSNTNGRVPFSLGKRLDI AI EVAEVLWCM  
 HSMYNPVLHGD I KPANI LVDENLSPKLSDFGI ARLLCANGAQHTNNI I GSI GYVDPAFCM  
 NGI LTPKSDVYSFGVLLI I TRKKAVDGTI TLAQRFTAEVEQGGKVMHLFDEDI NNTKN  
 MNFLEDI GKLA VKCLRREVEVRPEMVEVATSLRMI RKALEEEEEGNLI QQNI SAPSNSI PS  
 KNVKSAAQFGNLKI FKQEEI KLMTKNYSMKFREEFCERLYNGVI GTTHAVI VKQVSTSS  
 ESDRMMFLKTM I LSQKYHKNI ANVAGFHLGDSI SECVEYSCCDLSQGNLGHVFCNRNL  
 YDI I CTREKLPLHLRLSI AVQCAEGLVHI HSLLAENPDSHSTGLLGNFRSI NI FLDKNFV  
 PKVFNSNLSTFLGLSVMOKHTASVDRPNQDQSI YYLDGRDI SGQLFNPKSDVYSFGAVL  
 LELI TWKTVRYMSSGRVHMLTKDFLDYRI DHSAAI SFGKKVYDEQASGDNKPNQHVAPP  
 LTKKFVKTPPTI VSI I PLNI LEKI TSNFSNDALI GEGPDARVFFGELSDGQKSAI KKLDP  
 NEKI VVQVLT I SRMLKHDNI VOI LGYFI EGENRVLAYEYAPKGLHDI LHEGVGAQPGT  
 PLSWEQVRKI ALSAAGLEFLHEKAVPPVI HTNI RSSNI FI FGNDVAKI GDLGVSKQLYP  
 ESDNDYYNTRLYPLRSFGYDAI APEYAMKDFHA\*

>OsWAK4, AK064374, Chromosome 1, protein sequence  
 MNLFDEEI NDKQNMNFLEDI GKLA VKCLRRDVKVRPEMVEVATSLRMI RKDLEGEQGNLTQHTSTPNN  
 TPSKNESAGROFGNLNI FKQEEI KHMTNYSMTFREEFHERLYNGVLGMVHAVI VKQVSTSSKTDREVF  
 LKTMGI LCQKYHKNVANVAGFHLGEYI SECVEYSCCELSQVNNH I SFSNRNLYEI I CSTEKLPLHVRLS  
 I AVQCLEGLVHI HSFLAENPESRGTS LFGNFRSANI FLDKNFMKPVFNANLSTFLGLCAVQOCTASVDCI  
 HDORSQKYLLDPKDVSDHLFNPKSDVYSFGVLLI I TWKTAKYKSGGOAHMLTTDFLDYRI DHSATDF  
 FVKKVYDEEGKCFLEHAI AI GVECLKLDVQMRPEMSDVLRLRI I SAAQSI RSKLMGPOAKDCGDNGPSQ  
 YI APTPVNNDVKI PSPPTSASTI SLDI LKKI TRNFSNLSI GEGSHAKVFFGVLDGKNSAVKKLNPNEE  
 TI VQVSTI SKMLKHDNVQI HEYFI EGENHVLVYEPKGLHDI LHGREGVTGAQARPPLSWVQVRI A  
 I TAAKGLEFLHEKAVPPVI HTNI KSSNI LLFGNDVAKI GDLGVSKQLHVEDYDYSYTRVVPQI FRYEAP  
 YATQCFHAFRLH

>OsWAK5, 2768.t00008, Chromosome 1, protein sequence  
 MASAI LLSI AI MAQLSSI SAQPAPGCQSHCGDMEI PYPFGI GTECAI EPGFVI YCNKTADGSMKPFLLI NV  
 EVLNI SLLHGQTRALNALSTYCYNDVTKSMESSRWLDFSTWYPYRFSNLHNKFFVI GCNTLSYI YNGEYT  
 TACASVCAKAPTNDSCDGVGCCQNNI AKGLNSYNVTFFTVYNDSSNLQSNPCSYAALVETDTFRFKTEYV

OsWAKs-Supplemental Data 2[1].txt

TTMKFNETYNGQOPVVLDAI GKVGCKEANMTSYACRSKHSECVDSI NGPGYLCNCTLGYPYHGNPYI TDGC  
I DVNECEQNQSPCKGATCRNTEGWYHCSCPVGKRLAKETNTCNPD I SLI I GVS I GSI VLVI I I FFVRI I  
FERRKLT DVKKKYI QEHGGLLLFEKMKSDOGLAFKVFTOAELEOATNKFEKSOI LGHGGHGT VYKGI TKD  
NI TVAI KKCALI DDRHKKEFGKEMLI LSQI NHKNI VKLLGCCLEVDVPM LVYEFI PNGTLFDLI HGKNRT  
LHI PFSSLLRI VNEAAEGLAF LHSYANPPI LHGDVKT SNI LLDENYMAKVSDFGASI LAPNDEAQFVTMV  
QGTCGYLDPEYLQTCQLTEKSDVYSFGVVI LEI LTGQMP LKLEGSELOKSLSSSFLLAMKENNLEAMLDS  
QI KGHEMELL SGLAELAKQCLDMCSEN RPSMKDVAEEI SRLRKL SKHPWI QRDSETEGYLSGPSTSNFE  
I EQSTEYTRKDEQMPI NPSTSYFI R

>OsWAK6, 2768.t00013, Chromosome 1, protein sequence  
MTI PFPFGLQEECSANRKFLLNCTSKQAFI GGSYTQYQVTNI SLDOGLLFVNFSQHEEAY  
SELVEI SRDNI SQWVESWI DEFNDFDV SQHYGI WKWFVTNMTCEKAKKSSAYACI STNDI  
DECSI PNDCKGMCHNQAGGYSCTRCPHGTSFDP AERKCTSTKQHNI VLGI SHFNRS LFNK  
I TVKWK RGI QKKI RRDYFHKNKGLLLEQLI SCDDSVAHKTKI FSLDELEKATNNFDSTRI  
LGSGGHGT VYKGI LSDQRVVAI KSKI VEQSEI DQFVNEVAMLSQI I HRNVVKLFGCCLE  
SEVPLL VYEFI SNGTLYDLLHGNLQSKCVLTWNNRI RI ALEAASALAYLHCAASVPI FHR  
DVKSANI LLDNFTTKVSDFGASRSVSI DETHVVTI VQGTFGYLDPEYYHTGOLNEKSDV  
YSFGVI LI ELI TRKRPI FLNSI GEKQNLCHHFLQRQONNTTSEI VDVQVLEEADQWEI DE  
I ASLAEI CLRLRGEQRPKMKEVELRLQLLR SKVAKKKNRVESI G\*

>OsWAK7, 2768.t00019, Chromosome 1, protein sequence  
MSPKLLLSVALVMLHLASI SAQPNPWCKKQCGDVKI PYPFGI GTGCAI GEGFEI I CNRNA  
DGI DQPF TGN I EVLDI SVVYGRSRVLGSI TTNCYNSSTGSANVNSWMDLSTSPYRFSDA  
YNTFVVI GCNTLAYI YNGLNRTSYTTACASVCGGPEDLTNGSCLGVGCCQNANAI PKGLT  
RQDI YLYTI YNTSESDSWKFNPCSYAALVETESFSFSTEYI TTMRFNDTYEGQOPLVLDW  
AI GDVSC EAVKNMTSYACHSGNSI CVDSKNGPGYLCNCSEGYQGNPYLPDGCTGKFSSSL  
CNSLSLYLQFNEI LNDVLS DYLG VNLKPSFPM SKVI CNKRDDTSYI GGI SSFFY\*

>OsWAK8, 2768.t00020, Chromosome 1, protein sequence  
MEMRGRRRERDVNECEQNPS PCTKGETCRNTI GWYYCSRPSCLGRKLARETNTCNPD I N  
LI I GI CI GSVALVI TI FFMRLMFERRKLT DVKKKYFQOHGGLI LFDKMKSDOGLAFKVFT  
QAELEHATNKFEKSOI LGHGGHGT VYKGI TKDNI TVAVKKCALI DDRHKKEFGKEMLI LS  
QI NHKNI VKLLGCCLEVDI PMLVYEFI PNGTLFDLI HGKNRTFHI PFSSLLRI VNEAAEG  
LAFLHSYANPPI LHGDVKT SNI LLDENYMAKVSDFGASI LALSDEDDQFVTMVQGT CGYLD  
PEYLQTCRLTDKSDVYSFGVVLLEVMTGQMP LKFEGPEI QKSLSSSFLLAMKENNLEAML  
DSQI KDHEMELL SGLADI AKKCLDMCSDNRPSMKEVSEELSRLRKFSKHPWI QRDTEI E  
SFLSGPSTSNLETEHSYLSGPSTSNFEI EHNT EYRRKDEEMPI NPSTSYFI R\*

>OsWAK9, 2768.t00022, Chromosome 1, protein sequence  
MKAERNNTVLFEI KFGRYNFNGVVI GLVVGTVGLALSLVLT I LLRRWK RGI QKKI RRAYF  
RKNKGLVLERLI SSDESVAHSTKI FSLEELERAPDHFNSTRI LGRGGHGI VYKGI LSDQ  
RVVAI KRSKI VEQGEI DQFVNEVAI LSQI I HRNVVKLFGCCFESEVPLL VYEFI SNGTLYD  
I LHGDMSTEC SLKWDDR VRI SLETASALAYLHCAASI PI FHKDVKSANI LLDNFTTKVS  
DFGASRSI SI DETHVVTI VQGTFGYLDPEYYHTGOLTA KSDVYSFGVI LVELLTRKKPI F  
LNCSGEKQNLCHYFLQSLRDKTTTDM LDSQVVEEGLNGEI DEFVSLAEACLRLRGEDRPT  
MKEVESRLQLLRANI TKKI QDESQKNVEAMQLFPSVYDSTSFTQNVDI GMDADSLTQLAS  
TCHTMEQELVSLTR\*

>OsWAK10a, AK102164, Chromosome 1, protein sequence  
MAHLPLLLLSFLLLI GVHASVSDGSPLPHTYNTSI CSKSYKCGGVNI SYPFYLSNATGET  
YDYTFQSCGYTDLNI TCSWDGSKQTPFI QLNGDNYTI LEI I YDSRTI VLVDTDALRGGSC  
PRVRHNI TFSQADEWLQYTGRDNL TFFFGCNLVLPMPDPGLTRFVDKNQI NCKDFS NW  
PDGGDSFVFTSVELEAPMEYELASRCROVI VVPVNGSI LNSSSQSALPSGEYGOVLKKG  
ELAWKSRKDKQCNLC EQSRGQCAYSQNRFTLGCLCADGKVSSTDCTSRSNLKT KI I AGVV  
GGGLSAVFALGLI ATVFVVRKRKHKKVNSSSKLLKYSGSGGTPRSMGGDMESGSVKDLQT  
HLFSYEEATDSFNENLGDGGFGTVYKGI LRDGRVAVKRLYNNSYRRVEQFVNEA  
AI LSRLRHPNLVMFYGCTSSQSRELLLVYEFVANGTVADHLHGHR AQERALS WPLRLNI A  
VESAAALTYLHAI EPPI VHRDVKT TNI LLDADFHVKVADFGLSRLFPLDVTHVSTAPQGT  
PGYVDPEYHQCYQLTDKSDVYSFGVVLVELI SSKPAVDI TRORNEI NLAGMAI NRI OKSQ  
LEELVDLELGYESDPATKKMMTMVAELAFRCLOQNGEMRPPI KEVLEGLKGVQDLCVMEK  
DGGKDKKGPDPPLSPDTVHAQWDSRQTTNPNTSQ

>OsWAK10b, AK100606, Chromosome 1, protein sequence  
Page 2

OsWAKs-Supplemental Data 2[1].txt

MSRLCHHGGRVLLPLLLVAAACLGDPDGTGDTYDTAMCGAQASI TCGGVI VRYPFYLSNATR  
ALPKYANSSTFCGYPGLEI I CDGGGGGKAVMMLGNDSTYVSRI DYASLTVSLADADVANG  
TCPVVSHNVTI PPAPSSLHLADTVGMLI FFFRCAFGPAANAPPKPSI HPLTCGENSEDA  
PTQSFLLPASPLPPGDLWHRGCSAVYGVVPLGGSLPSDANDPAWRKDGVI ASLRKGFQMS  
WDRSDRCSRCELTSGKCGYNQNGKFLGCLCANGLVSDACSKI SDSTLRLAGSNLTKTI I  
AGVVGGGLSAVFALGLI ATVFVVRKRKHKKVNSSSKLLKYSGSGGTPRSMGGDMESGSVK  
DLQTHLFSYEELEEATDSFNENRELGDGGFGTVYKGI LRDGRVVAVKRLYNNSYRRVEQF  
VNEAAI LSRLRHPNLVMFYGCTSSQSRELLLVYEFVANGTVADHLHGHRALSWPLR  
LNI AVESAAALTYLHAI EPPV VHRDVKTNI LLDADFHVKVADFGLSRLFPLDVTHVSTA  
PQGTGPGYVDPEYHQCYQLTDKSDVYSFGVVLVELI SSKPAVDI TRORNEI NLAGMAI NRI  
QKSQLEELVDLELGYESDPATKKMMTMVAELAFRCLOQNGEMRPPI KEVLEGLKGVQDLC  
VMEKDGGKDKKGPDPPLSPDTHAQWDSRQTTNPNTSQ

>OsWAK10c, AK066381, Chromosome 1, protein sequence  
MGGDMESGSVKDLQTHLFSYEELEEATDSFNENRELGDGGFGTVYKGI LRDGRVVAVKRL  
YNNSYRRVEQFVNEAAI LSRLRHPNLVMFYGCTSSQSRELLLVYEFVANGTVADHLHGHR  
AQERALSWSPLRLNI AVESAAALTYLHAI EPPV VHRDVKTNI LLDADFHVKVADFGLSRLF  
FPLDVTHVSTAPQGTGPGYVDPEYHQCYQLTDKSDVYSFGVVLVELI SSKPAVDI TRORNE  
I NLAGMAI NRI QKSQLEELVDLELGYESDPATKKMMTMVAELAFRCLOQNGEMRPPI KEV  
LEGLKGVQDLCVMEKDGGKDKKGPDPPLSPDTHAQWDSRQTTNPNTSQ

>OsWAK11, 3783.t00017, Chromosome 2, protein sequence  
MTGVVPWMI LATTLLLATI SFSAAARMAPRCRGTCGNLTI PYPFGI GAGCFYTDGFDVS  
CEENRTYMHNSSSNMEI YSLNLI GGQAQVSTFI ADKCSNNTDGTSTDGWVSTSTAPFFTL  
SSRANKLTVVGCNTLAFLGGYNEEQNVGAGCFSMCPDKQSVSDSSGQCSGMGCCQTSI AP  
NLTSLNVTDFSRFNNSEVNSFNPCSYAFVAEQDWRFEPTYLEGHKFTDKYKGVPTVLDW  
VAGRESCAQAPKNRTSYACVSTNSSCI NSPNATGYLCACNNGFAGNPYLEGGCQDI NECE  
SPGQYCHGI CDNTI GGYHCYCGPGTQSTDPKREPCNPI TASERARLTKTFI GI SVCAI I L  
LSCTFALLI ECQKRKLMKEKERFFQONGGMLLYEQI RSKQVDTVRI FTKEELENATDNFD  
SSKELGRGGHGTVYKGI LKDNRI VAI KRSKI MNMVQKDEFVQEMI I LSQI NHRNVVRLLG  
CCLEVEVPMLVYEFI PNGTLFEHI HGKYRTTSI SLARLRI AQESAEALAYLHSSASPPV  
VHGDVKSPNI LLGDNYI TKVTDFGASRMPLKDEI QFMTMVQGTGLGYLDPEYLOERQLTOK  
SDVYSFGVVLLELI TGKTAI YSENTTEKKSLASSFLLALKENRLESI LDRNI LGVGTSELF  
QDVAQLAKCCLSTKGEERPLMTEVAERLKAIRSTWREQLI EGANEETVCLLENSSQYDPS  
TTGRHGSLMALDI ETGR\*

>OsWAK12, 4362.t00002, Chromosome 2, protein sequence  
MQPSETCLRRCGDVEI PYPFGVSGCHLETGDTFVLSCNRSADGRLRVYNYEI EVVDVS  
VRRGQLRI YSAI NPWCYNGSTSAMNGOSNWWYDMSI TNFRI NDALNRFTVVGNSLAYI L  
SPNGTAGADRYMTGCMAMCPGAGRLEKENGSCAGVGCCQTAI PAGLNGYQVSFEKFNTS  
AI AGFSRCSYAVLVEASAFDFRASYVTTDEFMASNGGQLPLVLDWAI GNKTCEEAKRNAS  
AYACVSANSECVDSDRYGRGRGYLCNCSAGYDGNPYLLDGCQDI NECDESFRYPCSVPGT  
CVNTPGGFTCTCPDKTI GNAYNGTCGDNKSQLGWKI AI GI SSGVVI LI I TASCVYMI HAK  
RRLAKI KREHFROHGGLLLFEEMKSROGLSFALFTQEELEQATNRFDERNVI GKGGNGTV  
YRGTI AKDNGAVVAI KRCRLATERQKKEFGKEMLI LSQI NHRNI VKLYGCCLEVEVPMLV  
YKYI PNGTLYRLI HGGEAGASARRI PFAARVRI AHQAAEALAYLHSSWASPPV I HGDVKTS  
NI LLEDYAAKVSDFGASTLAPADAAQVTFVQGTGCGYLDPEYMRTCRLTDKSDVYSFGV  
VLLELLTCRKALNLEEEEEEKYLSSQFLLAVGEGRLGEI LDPQI KGEQSMEVLEQVAELA  
KQCLEI SGEKRPSMREVAEELDRGLKLSLHPWGPNSGELAALLGGSPSMAADSDQI ELS  
TSTRNI SFSDTAYI GI RSPR\*

>OsWAK13, 4362.t00004, Chromosome 2, protein sequence  
MLLPLMAVLI ASAWPAAASTTTAAQAACORRCGDVDI PYPFGI GRGCLYTGEEDVT  
FGLTCNRTADGSYRPFCEWEYEVLDVSLRRQARVRNDI NRWCYNATTRSMDAESTWWWV  
SDSWFHVSDEGNRLVVVGCNSLAYVTSVNETEYMTGCMATCPSVGRLENGSCSGMGCCCEA  
AI PRGI NSYVVGFEKFNNTSGAVGRCSYAVVVEAASFERTTYVTGDFVESTGGKVPL  
VLDWVVGKKTREARRNATGYMCVSRDSECVDSRNGPGYLCNCSAGFEGNPYLLDGCQDI  
NECEDSRFKYPCSVPGTCI NTPGGFRCSGCPDKTTGNAYFGTCEAKKSQLGVHI AI GVSIG  
I ALLVI I MSSAYMI QOKRRLATVKRRYFNQHGGLLLFEEMKSNOGLSFTVFTKDELEEAT  
NKFDERNVLGKGGNGTVYRGTLKDGRRVAI KRCKLI NERQKKEFGKEMLI LSQI NHRNI V  
KLHGCCLEVEVPMLVYEFI PNGTLYQLI HGGRHGSRI SFAARLKI AHEAAEALAYLHSSW  
ASPPV I HGDVKSPNMLI DENYTVKVSDFGASTLAPTDEAQFVTLVQGTGCGYLDPEYMQTCK  
LTDKSDVYSFGVVLLELLTCRKALNLOALEEEKNLSSHFLALSENRLLEGI LDSQI QSEQ

OsWAKs-Supplemental Data 2[1].txt  
SI ELI EQMADLAKQCLDMSSEKRPMSRQVAEELDRLRKLAEHPWGRHESEELEKLLVRGS  
PSTFSEI ELSNGYVSLTDSAYLGI QSPR\*

>OsWAK14, 2541.t00004, Chromosome 2, protein sequence  
MSSSLVAACAVSFVLLCSAATSPASAAVYGVGGGLLSI PSNDSLHCPSRCGDVGI DYP  
FGI APGCFREGFELI CRNTAKTPKFLGDTTEI TDLGYRYVLAQI YFNI TVRPGTDTYN  
I SWVAPTEGI TI DHYNTFYVI GCNFDATLFEYGTEDLI GSCMSRCDGEKAPI GGPCNGMG  
CCFI ELPRVLRGFQSTI I LRS DGI PVAQTDVPHPGI MAFMSSDYYI SNTSDLFLGWTNTS  
NVEGTVLSFATI DQPS CERARMNNTSYACSPGSNCRNVSSGGYHCYCSGYEQGNPYLLDG  
CTDYNPKYKEHCSTSCGDMKI PFPFVGEEGCFANERFRLNCTEGNLTVC ELGEAQYHVTA  
VSLDDGTLTVGNMNDNTNYESKEAI I VQTTDTGRDYSFSGPVEDRFDLSMEYAI VI RWA VT  
NLTCEVAVQKNTTYACRSSHSYCLNVTHRKEFMGYRCKCSPGFEGNPYI EDGCTGI AI GI  
GCGLGSI VI VLGAMI LANKWRKGI QKRI RRAYFKKNQGLLLEQLI SNESATNKTKI FSLE  
ELEEATNNFDGTRVLGRGGHGT VYKGI LSDQRVVAI KSKI VEQTEI DQFI NEVVI LSQI  
I HRNVVKI FGCCLESEVPLLVEFI SNGTLHDHLHTDLSVRCSLSWDDRI RI AVEAAGAL  
SYLHSA AAI PI FHRDVKSSNI LLDGSFTTKVSDFGASRSVSLDETHVVTI VQGTFGYLD P  
EYYHTGOLTEKSDVYSFGVI LVELLI RKKPI FI NEAGAKQSLSHYFVEGLOEGSLMEI I D  
POVVEEANKKEI DGI ASLTMACLKVKGVD RPTMKEVEMRLQFLKTKRLRK FOLLPGNDGE  
I EHLLSPNTSNSYAQNI YTNAGDLTSEGI PGSGCYSLEQELSSSI SLPR\*

>OsWAK15, 2541.t00005, Chromosome 2, protein sequence  
MSSSFLAVCATSFVLVCSAATPRVLASVYGVGGGLLI VPSNDSLHCPSSCGEVDGI SYP  
FGI GGGCFRDGFELTCNTATKTPKLLVANSTTQI TAMEYDMALAPMYFNFTTROGMDTYN  
I SWVSPAKGI KI S DENTFYVCCNF DATLFEFGTGDFV GSCMSRCDI EKAPI AI GQPCNG  
NGCCSI KLSRDMRGFQSTLVQAEAAAQI SDPLHHGI MAFMSYTDYYVRNASDLFLSWTNV  
SNVEGAELQFAI TDQPSG SALVNKSSYACTTGSNCQNI SSGYTCECTNRYLOGNPYI L  
GGCNMQDHI TVLETSEAQFI VTNVSVEDGTLTI SNLLNNT EYGREI LI TQGHGT VYKGI L  
SDQSVVAI KSKI VEQTEI DQFI NEVAI LSQI I HRNVVKLFGCCLESEVPLLVEFI PNG  
TLHDRLHTDVSVKSSLSWDDRI RI ASEAAGALAYLHSA AAI PI FHRDVKSSNI LLDGSFT  
TKVSDFGASRSVSLDETHVVTI VQGTFGYLDPEYYHTGOLTEKSDVYSFGVI LVELL TRK  
KPI FI NDVGTKQSLSHYFVDRLREGSLI EI I DYQVLEE AHREDI DDI ASLTEACKLRGG  
DRPTMKEVEMRLQFLRTKRLRK FQFLPVP GSGGEI QHLLSPNAGKSQAQNNYTSAGDLSY  
EGI SSCYSLEQELSSSVSLPR\*

>OsWAK16, 2541.t00008, Chromosome 2, protein sequence  
MRSSFVAACAI SLVLVCSAATTPRALAAVYGDGGGLLSI PSNDSLHCPSSCGDVDDI AY  
PFGI GPGCFREGFELKCNSTSTKTPKLYMKDGTTOI LYVGDDDLWAPMHFNI TMKPGTDTY  
NI SWVSPRKGVTI SQRNFTFYI I GCNI DVTLF EYGT RD AVGYCVSRCDGEKVPTEGPCNGK  
GCCSI KLSRDLRGFRSTLVQVDATAAQSYQLQLRHGVMAFMSYNDYYVDNATDLFLSWTN  
TSNI QEALVQFAI MDQPSCEI ARMKNTSYACSTGSNCLNMSSGGYTCECANYDLYYYYAE  
QSPYLLEGCI I RGNI TLFNPRDARYNVTDVSI EEGTMVVS NLLNDTEYGGEDI I SOVYGG  
AEI KWAVANLTCDAAVKKDATYACRSI HSNCLNVTHGNI FMGYRCKCLPGFRGNPYI QDG  
CEGI TTGI SCGI GSI I I ALGAI I LANKWKSI QKRI RRAYFKKNQGLLLEQLI SDESATN  
KTRI FSLEEELEATNNFDGTRVLGRGGHGT VYKGI LSDQSVVAI KSKI VEQTEI DQFI N  
EVAI LSQI I HRNVVKLFGCCLESEVPLLVEFI PNGTLHDRLHTDVSVKSSLSWDDRI RI  
ASEAAGALAYLHSA AAI PI FHRDVKSSNI LLDGNFTTKVSDFGASRSVSLDETHVVTI VQ  
GTFGYLDPEYYHTGOLTEKSDVYSFGVI LVELL TRKKPI FI NDVGTKQSLSHYFVDRLRE  
GSLI EI I DSHVLEE AHREDI DDI ASLTEACKLRGGDRPTMKEVEMRLQFLRTKRLRK FQ  
FLPVP GI GGEI QHLLSPDTGKSQAQNNYTSAGDLSYEGI SSCYSLEQELSSSVSLPR\*

>OsWAK17, 2421.t00020, Chromosome 2, protein sequence  
MTYSI RKLKYVDWFLMQVPPCNDNPKVATDNYSENRI LGPRWAEVYKGI LRNKNSTVFT  
VFNESQVEQFVNEI SI LSQI DHPNVVKLLGCCLETQVPLFDSYDNC SRNNWI PYSOLTEK  
SDVYSI GVVLAELLTTEKPVSFARPEDLRKLAMYLVMLVNKGCI LOAVKPI I LAEAREE  
QLYDVAHLSI MCLSLKGEQSTMKEVASVLNGLRRSLAKDKAI KGKEVYPQNKEEEEEYLL  
PGSGVGSSSTLHSSSEGRQCSMEVEMI ASCHLTR\*

>OSWAK18a, AK105477, Chromosome 2, protein sequence  
MSSKLCFSSGLASPLSQGCSWYLLSI SSFSATSFI I GRSSPLMLTHRI TRCVI SWSTSSV  
I SFLTWLSI SSSWRPSLTAVMKQDTRLLSSSDPPK

>OsWAK18b, AK103831, Chromosome 2, protein sequence  
MAEDGFRRRELLLVGDVSRWFLCLI QREYVRLVDVESAGHGVLAAAPRLAGALARQVTLRL

OsWAKs-Supplemental Data 2[1].txt

RPPARGCAASDVVI VGVNQVAKDGAPEHDKAVPRCGEPVGDAAAVVRRRAVPTDCFEAVV  
VAVASRVDEDPDLAVGDGKAHQFLTLI IQVVEVRSVAVALELEVFPGAAGANAEGVGDA  
DVPALVGAARPWLSRRCRCHRRQADEHDG

>OsWAK19, 2477.t00018, Chromosome 2, protein sequence  
MGGGPDFGCVSLAGGAASRRRCGVTRSI CRWSSGVSRSRSGGAAPPVVLTKVFARGPTSVHG  
GPGPRRRGKQLPRRQLQSNQALYRTPDYGSSI AYRFSTKRNLVVLGCPVLGYLI DADD  
NYTYVTGCTSTCRRSQSQDLPQGCTGESGCCQNTMPRALNVYKPYI LTLNKTEEPTRNV  
PDQQLPPTPEVFRHLDSTECQYVFAEDRWI NTNYSYRAFFNRTSDFAVPVVLDWAI RN  
VGSCDI AGRRAPTAI RFEI \*

>OsWAK20 9630.t05379, Chromosome 2, protein sequence  
MALAPATPASAQPLPGCPDKCGNI SI PYPFGI GAVCARGPKFQLECNHTYSPRLI AVI D  
SQSNLEI HLESLSLADGEARI YNNASRSLYNHSTGDLVRTNDVVYFLGREGPYRFSSAK  
NRFVALGCPNLGLLLDATENYVTGCI SLCRSSPLAVSAGACAGVGCCQSSI PSGLHTYYV  
NQDKPKNVTLQYYAATDYRYVFLADAEWLSTSYRGDFNRTGDFAVPVVLDWAI REVGSC  
AAMRNKADYACRSANSDCVSTEGEGYRCNCSRGEYGNPYLDGGCQDI DECERDKDACFG  
NKCTNTLGGYLCMCPPGARGNPLI EKGCVKTDLGLTI GI GVGSGAGLLAMAFGAVFLTRK  
I KNRRANMLRQMFVKQNRGHLLOQLVSQNTDI AERMI I PLAELEKATNKFDESREI GGGG  
HGTVYKGI LSDLHVVAI KKSVAI QREI DEF I NEVAI LSOI NHRNVVKLFGCCLETEVSL  
LI YEFI SNGTLYHHLHVEGPLSLSWEDRLRI ATETARALGYLHSAVSFPI I HRDI KSHNI  
LLDGSALTAKVSDFGASRCI PAEQTGVTTVI QGTGLGYLDPMYSYTGRLTEKSDVFSFGVVL  
I ELLTRKKPYSYRSPEDDGLVSHFTTLLTRDNLGHI LDPOVVEEGKEVKEVALLAVACV  
KLKAEERPTMRQVEMTLESI RSLFLQOEAI HSMANKSSKENHVSMSYPANEGTSMESTKO  
YSLEEEYLLSSRYPR\*

>OsWAK21, 2477.t00014, Chromosome 2, protein sequence  
MGVFSSLGVVVLLLLLVVALAPVRPASGOPLPGCPDRCGNI SVPYPFGI GARCARDFGYE  
LFCNHSYFPPRLTFFPPLPTPTSI LAGRRLNLASLSI ADGEAVALVNVFROCYSSNESYV  
SDNSRNYTVYLSLLGSNTYRVSAARNRFVALGCPNLGYLSDDAGYYI TGCTSVCRPSQWN  
SVSPAAGTGVGCCQSRI PPNVTYYEASVQGFQEAQRI FRENTTSCRYAFVVEDRWVDTT  
YRDSADFNRTDDFAVPVLDWAI RNVANCDI AKRNRTDYGRSTNSDCVDSTNGVGYRCK  
CSNGYDGNPYLDGGCTDI DECOHLDKYPCHGVCTNLLGGYKCDCPHGFSGDAI KNDCRPN  
DKFTLALKI VTGVSVGVLVSVFMCFWLYLGLQKRKLI RTKQRFQNGGVI LQQQMHSGG  
GTGGFKI FSTEELKKATNNFAADRVLGRGGHGVYKGVLEDNMVVAI KSKMMEEAQTKE  
FAREMF I LSOI NHRNVVKLLGCCLEVEVPMLVYEFVSNGTLYHYI HGKEPTTDI ALDNRL  
RI AAKSAEALAYMHSSASPI LHGDVKTANI LLDKLNKAVADFGASKLAPTDEAAI ATL  
VOGTGCGYLDPEYLMTCQLTDKSDVYSFGVVVLELLTRKKALYLDGPEEDMSLVSRFTTAV  
KAGRHRELMDSQVRKEMNDEMATEI ADLLMRCLSMNGEERPTMKEVAERLEMLRRYQOHP  
WAEAKDRYRLI SGDSTGYQEPGTAKSSSVAVSSAFEQVLYRHSPRWSSAAAASRPMP EI D  
I LRHPCSTPELI AGGRVLRCLALRRARR\*

>OsWAK22, 2477.t00012, Chromosome 2, protein sequence  
MATTTTLCLOGAALVLI VCLAPVAPAWAQAPAGCPDKCGNTSI PYPFGI GSRCARDFNFR  
LVCNHAYSPPLRFVSEVELVSLDGEARALI NARNYCSDGTTYI SYNALRRDSQGQLPL  
SDVSFGRSTAYRFSARNRFVVLGCPVLGYLVDAEEYVSGCI SMCRKSQAGNDHLPYI L  
SLNKSAEENRVEPI YHRLNSTACNYMFLVEDKWI DTTYSYRAYFNRTDDFDVPVLDWAI  
RNVNRNCRVAKRNATKYACRSEWSECFDASDGVGYRCRCSNGYQGNPYLDGCTDI DECQD  
KEYGYCYGDCTNTI GGYTCLCPRGTI GNVHEKNVCRPKDKFTFALKAVTGVGLGVFMSVF  
MAFWLRRLRLOKRKLI RTROKFFEONGGI FLOQQMRSYGGAGGGVGGFKI FSTEELKNATN  
NFAVDRI LGHGGHGI VYKGVLEDNTVVAI KSKMMEEAQTKEFAREMF I LSOI NHRNVVK  
LLGCCLEVEVPMLVYEFVSNGTFYHYI HGKDPEVDI ALDTRLRI AAESAEALSYMSSAS  
PPI LHGDVKTANI LLDKFNKAVSDFGASKLAPTDEAEI ATLVOGTGCGYLDPEYLMTCQL  
TDKSDVYSFGVVVLELLTRKKALYLDGPEEDRCLVSCFTTAVKVGRHQELLDQVRNELS  
DEMLQEI TYLLMRCLSMI GEERPAMKEVAERLESRLRYQOHPWAKAEGNEEEI QSLLGME  
QNNANYQLRQDVLGLEEGNAYTFSL\*

>OsWAK23, AK108554, Chromosome 2, protein sequence  
MTEMTTSALHLQVLALTFLVCAAATPAASAQQQQLPGCPDKCGDI SI PYPFGI GARCA  
RDQYFELECNRAYSPRLI VSTHRQHLVNLSLADGEATALI NARRQCYNSTEGLI GDANN  
YVNKDI TLVGSNAYRFSARNRFVALGCPNMGYFVDTYGYVSGCTSI CRPSQNGGASGA  
STGGCTGEGCCQSRI PTNTDYYELYVQTFKPGEGDPI LRGGTTACRYVFLAEDKWI DTTY  
RGHPDFDRNDDFAVPSCSTGPSGTSVTAAPLPVT

# OsWAKs-Supplemental Data 2[1].txt

>OsWAK24, 4897.t00005, Chromosome 2, protein sequence  
 MATNTLHLQAI ALAAVLLI CRLSPVTPAASAOQLTGCRDKCGNI NVPYPFGI GARCARDE  
 GFQLNCDDASAPPRLLTLQFEQHPQLVSLSLADGEARVLLKPESKCYPPPEERSSDVPTS  
 SYTSI NGSTTYRYSPEKNRLVALGCPNLGYI VDGSGNYVSGCMSACRRPSLGNLTVPRLP  
 GRCTGERCCQSI I PPTLNFYVPRMFNFENGTAAVDNELRGGTTPCRYVFLVEHTWI NTVY  
 NDTKDFNRSDFEAVPVVLDWAI RNVYNCSAAKRNATDYACRSTNSECFDTI DGQGYRCNC  
 CQGYEGNPYLDGGCTDI NECLRPEKYGCYGDCTNMLGSHTCVCPPGTSNWTDRNGCRPK  
 DNFPLALKVVTGVSQVFLSVFMCFWLYLGLQKRKLI RTKQKFFEHNNGVI LROOMHSGG  
 GTHGFRI FSTEELKRATHNFASDRVLGRGGHGVVYKGVLEDKTVVAI KSKMMEEAETKE  
 FAREMFI LSQI NHRNVVLLGCCLEVEVPMLVYEFVSNGLTYHYI HGKEPKADI PLDTRL  
 RI AAESAEALSVMHSSASPP I LHGDVKTANI LLDDKFNKVSDFGASKLAPTDEAEI ATL  
 VQGTGCGYLDPEYLMTCQLTDKSDVYSFGVVMLELLTRKKALYLDGPEENRSLVSCFTTAM  
 KVGRHQELLDQVRNEMSAEMLEEI TYLLMRCI SMNGEERPTMKEVAERLEMLRRYQOHP  
 WAEAEADNAEEI ESLLGREQONANYQLEQONVLYLEEGRNYTFSM\*

>OsWAK25 AK101690, Chromosome 3, protein sequence  
 MRGAARLLLPLVLLLLHAARGSGSTGGGGNGSCTQSCGRMRVPYPFGFSRGCTVOLGCD  
 DASGTAWLGGTRGLGLLVSNVTPRAI VLTLPNCSRPLNESLDALFTDNYAPTAQNALVV  
 SSCDPQAAARLNSCSI PPEAYLEKSCNSI RCVLPSTKANVDGTNVTDPFLNRSEMRRLGS  
 DCRGLVSASI YSNTAGPALQTLALELDWWVQGRGCSHA I CDGFTPPSTQKEAFRCECO  
 EGFEGDGYTAGAGCRRVPKCNPSKYLSCGKLVQI GLLVAGVFFGAMVMGI TCLVYHLL  
 RRRSAALRSQKSTKRLLSEASCTVPFYTYREI DRATNGFAEDORLGTGAYGTVYAGRLSN  
 NRLVAVKRI KORDNAGLDRVMNEVKLVSSVSHRNLRLLGCC I EHQQI LVYEFMPNGTL  
 AQHLQEREGPAVPWTVRLRI AVETAKAI AYLHSEVHPPI YHRDI KSSNI LLDHEYNSKVA  
 DFGLSRMGMTSDVSSH I STAPQGTGYPVDPOYHONFHLSDKSDVYSFGVVLVEI I TAMKA  
 VDFSRVGSEVNLAQLAVDRI GKGLDDI VDPYLDPHRDAWTLTSI HKVAELAFRCLAFHS  
 EMRPSMAEVADELEQI QVSGWAPSTDDATFMSTTSSLCSAPSRCITDKSWGTA KSKRQAA  
 ANAVVKQETTKCAVADSPVSVQERWFSRSPSSNSLLRNSSLN

>OsWAK26, 4613.t00011, Chromosome 3, protein sequence  
 MESSSSVI FLGTGCSGALPDARCLI HPSTPPCPVCSHSLSPERNPNYRCNTSLLI DYC  
 QHDGI HKYI LI DVGKTFREQVLRWFSHHKI PYVDSI I LTHEHADA VLGDDVWVQPSGC  
 RNLGLKVPI FLTHFTMNSVAARFPYLLKNKLEEGDEGSQVI QLDWTI I EGD I DKPFVSSG  
 LEFVPLPVMHGEDYVCLGFLFGRRSRI AYLSDVSR I LPRTEHAI SKSGAGQLDL I LETN  
 ELHGEGDAGSCHLTLSQTLNAV KRI SPKRALLI GMNHEFEHHKENQTLAEWSSSEI I VEH  
 FRI I PFACFKRKRKFHLLSSSSGVSSAAAAGRAI SLPGCPDKCGDVSI PYPFGVGDRCOA  
 VGLNPYFI TCDDAVRPPVPKLGDPGMEAEVLDI TLERGEI RLTGFLSYVCYTSSNSSYA  
 SLPGGI FVGGTQLRVSPSRNQLTVI GCRALGLLVGGAHAGGSGDGDEYATGCYTYCASLN  
 STDADGAPCAGTGCCQAPI SSDLAYVGGTFPSNWTNSGWRFNPCFYALI AEVGWYSFRRR  
 HLAGVLGFVNETKPSDI PVVLDWAARDGWCPATAEEKARRKYACVSGNSHCVNSSNGMGY  
 SCSCNQGYEGNPYLDNGCQDI DECTLRRQGRQYEDVYPCKHGI CI NTPGSYRCKCKAGTK  
 PDGTFNGCQQVLPMAAKVI I GLSACSI FVMALSCMLVI QLQRRKHTI EKQYFRRNGGLR  
 LYDEMVSROQDTRVRLTVDELKATDNFSDARVLGRGGHGTVYRGTLDDLREVAI KRKA  
 AVDGDGDDGGGCKEEFVNEI I VLSQI NHRHVRLLGCCLEVHVPMLVYEFVPNGTLFDLLH  
 GGTAARRRPVSLGLRLKI AAQSAEALAYLHSSASRAI LHGDVKSLNI LLDGALDAKVADF  
 GASALRSAMGEGESFI EYVQGTGLGYLDPESEFVSRHLTDKSDVYSFGVVLAEI TRKKAVY  
 EDDGGGGGGSGEKRSLSSTFLAASSRGELWRVVDRI MDGDDVDVAVVRELARVAEECMGA  
 RGEERPAMKEVAERLQVLRVEMMEAAAGVEVVDGFNGGGLVGRHGHLDTTTTTTTSYYQ  
 SMETDKLQLDVLVLR\*

>OsWAK27 9631.t04035, Chromosome 3, protein sequence  
 MSLPGCPDKCGDVSI PYPFGI GDRCAAAGLSRFFNLTCGDSRSPVPMLGDPGAQADVI D  
 FSPERGELRLYAGLSYACYASSATSPSTNATFAFSLVGTGPFVSPSRNRLTVVGCALGL  
 VVGTAAGGGGDDDLATGCFTYCAELNAAGADGAPCAGAGCCQVPI SPDI PYLGAAFRT  
 GNWNTNARWFNPCFYAMFAEDGWYSFRRRLVGVLAYNETVDAGRGPVVI DWAVRDGW  
 CPATAEERARRKYACVSGNSYCVNSSNGMGYTCNCSRGYEGNPYLAGGCQDI NECVLREQ  
 DPKYEEMYPCHRI CI NTPGLSACAI LAMALSCLLVI QLQRRKHI QEQQYFKONGGLRL  
 FDEMVSROQDTRVRLTEDELKATNNSDDQVI GCGGHGTVYRGTLDDLREVAI KRSKAA  
 VDGRGGGGCEDEFVNEI I VLSQI NHRHVRLLGCCLEVHVPMLVYEFVPNGTLFDLLQGG  
 TAARRRPVSLGLRLKI AAQSAEALAYLHSSASRAI LHGDVKSLNI LLDGALDAKVADFGA  
 SVLRSAMGEGESFI EYVQGTGLGYLDPESEFVSRHLTDKSDVYSFGVVLAEIATRRKAVYDD  
 DDASCSGHGGQKRSLSSTFLAALRHGELWSVLDRELVRPDDGDDGDDKAAVDVVRELA

# OsWAKs-Supplemental Data 2[1].txt

LAARCLGPSGDERPAMKEVAERLQVLRRAEMRAVAGAGRDSNGGEVDRSWI MCGGGGGA  
VGRGHLDNTTASYQSTETDKMPLTLSVNDLAR\*

>OsWAK28 AK120279, Chromosome 3, protein sequence  
MGELLLWSI LVI HI SI PLRGC I LYNI GYLLVSHLMGSTKETI I ASMQLVLLSI I ASTVML  
VASGAPPPTAASLAPCPKTCGEVNI WYPYGI GPGCFRQGFELTCDDTSEPLKFLGNTMT  
QVI SLYPSGTVLASI MYTI PMI HGVDYTNLSWDSPGRNLLNVVTYNYLAFLGCGI GVVLFH  
PDTGNLVGHCTI KCASMEEMHMATEGGI CNGMGCCTVTFPVLFGRFRVTI VKSNETI POP  
FNNI TI KAFLTFRPYI FSI ADLLSNKI NASTI GASMAYLSTVI ADEPNCPTARLDNKTOF  
ACGSNNCI DVANGGYSCACPGNSDDGNPYLLDDCKQEFNPTPKKNCSRSCGSTNI PFPFG  
LEPGCFAKRRLQSCASNRTLI GRPPAKYEVTNI SLDEGLLYVNKLSEFEDANTKYLSVY  
YGGSGCFGQQLI YGLEKSDLSEYGVWKSVTNLTCEDAKSKSAYACVSTNSECLDVTHG  
KLYI GYRCKCSLGFEGNPYVQNGCTDI DECSI PNYCNGTCYNFKGSYSCCPHGMSYDRVR  
ROCTSNKRQNI VLGLAI GI SSGFGVLALT I AAI LFKRWKRSTRKKI RRAYFRKNKGLLL  
EQLI SSSNNVTPNTRI FSLEDLEKATNNFDPTRI LGYGGHGTVYKGI LSDQRVVAI KRK  
I VEQSEI DQFVNEVAI LSQI I HRNVVKLFGCCLESEVPLLVEFI SNGTLHGLLHGDLS  
NCLLTWDDRMRI ALEAAGALAYLHSSAAMPI FHRDVKSTNI LLDGTFTTKVSDFGASRSI  
SI DQTRVVTI VQGTFGYLDPEYFYTSQLTEKSDVYSFGVI LVELLTRKKPI FLNCLGEQK  
NLCHCFLOSLRDKTTMDI LDSQVVEEASHREI DEMASVAEMCLKTKGAKRPMKEVEI RL  
QLLRAARSRAYKEDLQRSSEI KPLLTPKYKCTSLNSTKNVEMGLVANPESQVVSRCYTME  
REMMYSSQFPR

>OsWAK29 AK102639, Chromosome 4, protein sequence  
MGPVLLCLAI AAATAVCAASSGAPPSPDAAAVAVGSCPTYSGSGYSSASDGGNQEEYDPN  
KENPCKRSCGMSI PFPFALLSACSGSKRFLNCTSNKTLI GI PPAQYQVI NI SLDDGVL  
FVNKPSNLGDI I TTPTVANELHDFDFSGSQI WRWAVANOTCHTARTDQLSYACVSNNSL  
CVHRSTGYHCKCSLGYGGNAYI EDGCEDI DECSLPNFCNGNCQNFLGSYRCSHCPRGSI F  
DPAKRVC I YGHGLHPAGLLI GLSCGI GVLFLVGLI LFVRRWRRHMQRKI RREYFQKNKG  
LLLEQLMSSDENVAHDPKI FSLEELEKATDNFHSRI LGCGHGTVYKGI LLDQRVVAI K  
KSRI VEQNEI DQFI NEVAI LSQI VHRNVVKLFGCCLVSKVPLLVEFI SNGTLYDLLHGE  
QSTTFSLTWEDSI RI SLEVASALSYLHSAASI PI FHRDVKSANI LLNDNYTSKVSDFGAS  
RSI SI DETRVVTI VQGTFGYLDPEYFHTCOLTEKSDVYSFGVI LVEI LTRKKPI I VNCFG  
ENONLGHCFLOTLQHTI MEI VDPQI AKEANESEI NEMASLAEI CLRI RGEERPMMKEVE  
LRLQLLRAMI TERSRQELLRNNGI GPSVQNSSTTSVTRSVVLRAGI GI STDQDATRCYT  
MEQELVSWTDLPR

>OSWAK30/31, AK058435, Chromosome 4, protein sequence  
MFVVSAGALAVVKYPSVRARSAI TSKFI TTTQEEEEHSMQVKVTVGMPVTQOVNMTFLPS  
GYTL SAPYRLSPTGNMFTAVGCVTMAKLYGSVENSSSSSSTGATTTTAAAAGGQMI GERA  
YAYDAGCI TYCPSLSDAAADGAPCKDLGCCESPI TPGLTQFAVGWGRWPGASDDDYGELD  
PEQYYQYAFVAQDWYTFKQDHLTHWDI DNI SVPFVLHWDI KDGPACRPETNYDSPFGACH  
SNHSCANVTSGLDGYFCNCSEGYI GNPIY PDGCKDVNECENNSI CGAGSTCKNTEGSYR  
CDCNFGQRRDNSSDNMGNCEPI FSRAAI AVI GEVQYMNAMLI EI CSMPYI PHI I YNALI T  
CSSAFHVYTI FALHYI QLEAQH

>OsWAK32 AK067041, Chromosome 4, protein sequence  
MLVLASI AHAWVSTQOMI TLGI GVAHLASKEI HI SKMVAKVI I SALLPLPSDLALSLI L  
LSDVADI NECLVPNKCKGVCYNTPGSYRCTACPKTQYDMTTMQCTRRRQSLMLGVVI G  
LSCGFSI LLLSLGI MLLI HRWKDI QKQLRRKHFKQKQGLLLEQLI SSDENASENTKI FS  
LDELEKATNNFDPTRI LGHGGHGMVYKGI LSDQRVVAI KRKH I EEEI SQFI NEVAI LS  
QI NHRNI VKLFGCCLETEVPLLVDYFI PNGSLFGI LHSGSNNGFSLSWDDCLRI AVEAAG  
ALYYLHSAASVSFHRDVKSSNI LLDANYTAKVSDFGASRLVPI DQTHVVTNVQGI WLLR  
SRVLSYRAAE

>OsWAK33 AK067467, Chromosome 4, protein sequence  
MNLLCAI AI LPVI LVALLDTI PLASASSLMNHSQPSMATLASCPKSCGQMSI HYPFGI GA  
GCFRQPDFNLI CDNSTQPPKLLLHDGVTEI I GDTDSSFDMVDVGSTESI DVNI SSTI PMLS  
SI SHYNYSWNLSFSFI EYVI LNI TGCNFDYI I NPDTDI RTRI CRNSCPKEE I TEAVARQ  
SCNGTGCCTYDI YGVANLQLSFVRGDEGLLGGNSSRNSLWNI I NI RSWYAYVTWSI I DQP  
TCASAKDNRTDYACVSANSTCI DSFNSMEYLGYL CYCSSGI GNPIYVLHGCTRDEGYYPV  
QQKANCSTRRCNI SVPFPFGLLEEGCAARKLFQLNCTNVTSSSTLQFDRGHVVTDI DFAEGV  
VGI KLASFYCEEQFSMYRSGEPDLYASFGEAVI SVHWAAANLTCQEAQKNHSRYACVSAN  
STCLGVDSTYGYVGYRCKCMDGFHGNPYVVNGCEDI DECKKTPGI CKGI CHNDI GSYHCM

OsWAKs-Supplemental Data 2[1].txt

ECPDKTEYDVTAMQCVSRKKQNLLI GI VI GLSVGFTVLLFVLGGMLLLRRWERDI QRQLR  
RNYFRKNQGLLLEQLI SSDENASDKTKI FSLEELEKATNNFDPTRI LGRGGMAWYTKESY  
LI NVW

>OsWAK34 3230.t00010, Chromosome 4, protein sequence  
MATLASCPCSCGQMSI HYPFGI GAGCFRQPDFNLI CDNSTQPPKLLLHDGTTEVVGDEDS  
LRRTRYPVRGVRI WRSDSSI GMDVGLSEWI DI NI SATI PMVPGVAEYNYSWNLSFSI FD  
ASLNI TGCEFDTYI I NNKSYSPTTAI CKSSCPNKEI TETVARQSCNGTGCCTI YVGI DVA  
NLHLRFVRHGREGLGVNSSRSSLWNRI NI VSSYASVMWGI NNRPTCASVKDONQTDYAC  
ASANSQCVDISI SSTDLGYRCECNSGYI GNPYVLDGCTRDEVLNVSASGEVYELCSLKAG  
YHPVQOKANCNRWCGNI SVPFPFGLGEECTARKLFELNCTNVTSSLTQFNRGHVVTDI DL  
AEGVVGI KLI TSYYVEQVFRMYI SGEPYLYASFGEAVI SVHWAAANLTCQEAQKNHSRYA  
CVSANSTCLGVNSTDGYVGYRCKCMDGFHGNPYDANGCEDVDECKKTPGI FKGI CHNNI G  
SYQCMELDKTEYDVTAMQCVSRKKQNLLI GI VI GLSVGFTI LLFVMSGMLLLRRWKDI  
QRQLRRNYFRKNQGLLLEQLI SSDENASDKTKI FSLEELEKATNNFDPTRI LGRGGHGMV  
YKGI LSDQRVVAI KSKI I KDEI DNFI NEVAI LSQI NHRNI VRLFGCCLETEVPLLVDY  
FI PNGSLFGTLHADASTFGYLDPEYYHTGQLNKKSDVYSFGVLI ELLLRKEPI FTSETG  
LKQNLNYSYFLWEKKVKLI RDI VADQVLEEATEEEI HTVASLAEDCLSLRRDEI PTMKQVE  
WALQFLNKLNSYCTVOANKEEMDPFI MTKVQHSTENSNEVFLSNKATI SSYQPLEHE  
FMSSATI PR\*

>OsWAK35a AK108495, Chromosome 4, protein sequence  
MLRSEDRPTMKQVEMTLQFLRTKKLNSCHATPENDEELOQLLPRRSEASCEQVAVNLGNS  
ANSESRLSKCYSLEQEFI SSVGLPC

>OsWAK35b  
MI REKGTERTLYRRKKERKROSNVEEFHRFRKLGNLQGI

>OsWAK35c  
MSI I FI VLSI VALEKFQSLSCENMMWENRRSI ANEYNGFSSI SRSWSCCFI SI WSLDRATG  
ATGCKSQ

>OsWAK35d  
MI FFKKKYLI WSMAFYHCSFI SLKKLFALNKL VFFFFTRTYPSPVRPPENSPRLFHVPS  
PGASFSPARSRGRVVDHSPDSCQLPI ALP

>OsWAK36 5112.t00008, Chromosome 4, protein sequence  
MAAVVVDVLLACLALLLPASSCAAGAPTVAQAQTSAGAGGGYGAGCAKSCGDLTFDYPFG  
I GAGCARGHDFQLVCNTTTQPTLFLSDGFTQVI NSI GAAGYVYVNFSLDI PMRSGVDLY  
NVSWTVPGDSFSVRDSARVTI GHGNFDVYLLDAYSSKRI I LCSLTQPTNI DDTSDGEGCQ  
RNI PI VRGFQLOFVHRHEHGEQRTSVDSVRI ENDGVRLGWA I VDHSTCAEAKRDKSSYA  
CASKHSRCDNLSFTASRAGYLCKCTDGYQGNPYAPNGCRRDVGLPDARYDRFP SKNNCS  
PSCGNI SVYPYFGLGKCSANQHFLRCTYYKDNKSTNPDLLWWATRYTDEPSTPTKLVR  
I DI SEGLI I LAGEHYEEFLAMDGTASARVSDGSAKDFVKNLHFAI TNQTCKEAQONTTG  
YACSVNSTCLAVNTGDGYI GYRCKCKHGFEGNPSI KDGCGI VI GLSAGFI LLPGLSA  
KMLFHKWKKASVSVFHRDVKSSNI LLDANYTTKVSDFGTSRLVSI DQTHI VTKVQGPFGY  
LDPEYQTECLNEKSDVYSFGVVLLELLLMKEPI FTSENGLKLNLAGYFLEEKVRPLSE  
I VTTKI YEEATEEEI NNVTLAEMCLSPRGEERTMKQVEMTLQSLRNVTTTAVHRANA  
SDQLSQRCSLEHEFI ASAELPR\*

>OsWAK37 AK111580, Chromosome 4, protein sequence  
MHLLDHAGKI SHWELVLQVLVWLVSEFSYLAFLSVNREATSKGNYGKNI FRKTKAF  
Y

>OsWAK38 9632.t02788, Chromosome 4, protein sequence  
MRMPMSYECYNMTKHDMDCKANLSLTGSPFTFSNSANKFTVFGCRM LGYLGPGQSAV  
GSNLT I GCATSCGQGDLLSI NGECSGI GCCQTAI PKGI KHYKVVFDTHFNTSVI HNWS  
RCSYGALVEEASFKESTI YATSSNFSNPFGEPPFVVDWVANNTCAEARKHLDSYACAS  
SNSVCI DSSNGPGYFCKCSQGFEGNPYLGHDGCQDI NECEDSNKYPCYGKCI NKLGGFD  
CFCPAGTRGDASVGPCRKEFPLAFGI AI GLGVGFI LLLVLTVAFLVRKRKNDI OKQLRK  
KYFRKNQGLLLEQLI SSDECATDSTKI FTLEELKEATNNFDPARVLGSGGHGMVYKGI LS  
DQRVVAI KKPNI I REEEI SQFI NEVAI LSQI NHRNI VKLFGCCLETEVPLLVDYFVPNGS  
LNCI I HADPSMREFTLSWDQCLRI ATEAAGALYYLHSAASVSVLHRDVKSSNI LLDANYT  
AKVSDFGVSR LI PNDQTHVFTNI QGTFGYLDPEYYHTGHLNEKSDVYSFGVVLLELLLRK



OsWAKs-Supplemental Data 2[1].txt

OPI FDSESGSKKNLSI YFLSELKGRPVAEI AAPEVLEEATEDEI NI VASI ARACLRLRGE  
ERPTMKQVEMSLQSI RNKGFRSGTVSPEDSDELQTPQSEGHVDYHQATGI GI NSMANLAS  
PGCYSLQEEFMLSGLPR\*

>OsWAK39 9632.t02794, Chromosome 4, protein sequence  
MAACLAAVAASCQRKCEI DI PFPFGI AGQPGCMTGFKLSCNDTGNGVPTLLLRNVEVL  
GI SLPLGQARMKMDMSYDCYNTTRKDI DCVDMVDLNLKGGSPFTFSDTANKFI VFGCRMAL  
YLGPGEQNDVGSNLT I GCAATCGI GDDLVS I NSAGCSGI GCCQTN I PKGI RYYKWFWDGR  
FNTT DI YNWTRCAYAALVETSSFNSTVYNSLSRFNDNLGSQPPFVVDWAI GNSTCEQAK  
TNSDSYMC I SSNSVCLNSRNGPGYI CNCQNGFEGNPYLNSFGCQGKTKGVHMRCKLI NH  
RHI VKLFGCCLETEVPLLVYDFVPNGSLNQI I HGATSNRESSLSWDDCLRI ATEAAGALY  
YLHSAASVSVLHRDVKSSNI LLDANYTAKVADFGASRLI PNDQTHVFTNI QGTFGYLDPE  
YYHTGHLNEKSDVYSFGVVLLELLLRQPI FECESGTKKNLSI YFLYEI KGRPI TEI VAP  
EVLEEATEDEI NTVASI AQACLRLRGEERPTMKQVEMSLQSVRNKGFSSAGTSPESNHGM  
QPALSETYVNLHQPLGVHTI GI I NLASSNCNSLQOEFMLSASFASPYTLCAGPGLLAHRA  
GPAQRAVGAEQAWPGGOAGLTQARPKSGRAVLAPGQNAVWPAGPWGLGPYGHLYSI H

>OsWAK40 9632.t02799, Chromosome 4, protein sequence  
MGNGDEGAVEDVRAATNRASGYFFFSGREHWTGWRSSNDGDAASRVVAVATNPRPALSV  
AMVGMVTTTPRTTEEVAQTASALMAREAENGI HDMKGYNPFOOKANCSRSCGNI TVPYP  
FGL EEGCFARKLFHLNCTEANSSTLRFDKYNQVTDI KI EEGVLI KYDAGGGGDOEFMAI  
DGEPLYDGSWDYSI SVGWAVANLTCL EAKQNASGYACVSTNSTCVPVNSTSGYVGYRCN  
CTAGFHGNPYMLNGCI GKEH\*

>OsWAK41 4577.t00022, Chromosome 4, protein sequence  
MI RSPHAANSLQLLLVFLATTTLLTS AKDLAAPRRQEGHGRVVPSTATLAGCOSSCGDL  
TFVYPFGI GSGCFRSPDFELTCDSTTSPRLLFHDGI TQI AGSI NI VSTEFMDTDNSVST  
RFSHTI SMRNASVVSWSLSPKLL EHS LDAFYLT LWGLRFGCDFVYWLNRPSI NKATPN  
CTATCPKGESTGMVSPM QHCNGTGCCTI DFGAEI NAYSSTI EFKFVROAETNLESYHNRS  
LSWDTI YI TDPASRGLSWKI PDQPD CASARKNQTSYACVSNKSI CI DPDDVKQGYNCMCR  
NGYI GNPIYI LDGCSPPNDAKRNSSGYACI STNSECI TSKPTDTFVGYRCKCAQGYQGNPY  
I TNGCVGMVVGGGQTTGDRRI \*

>OsWAK42 4577.t00017, Chromosome 4, protein sequence  
MRGDWKRRPMAMTRGRAHRRPRKEELRRI SGEEGRPAEVLLVLADVREATARVDVDRSGG  
ATRLGGGGERGGGLGCAVGVLLEGWRGGNKRPPDFPLRWRSWRWRWLGAATAVAAGNGDRS  
SPECGS AWVRRGESEGEYAGLGKNGETDEGSTGMLFMGSGRRDRGRTWRNRP AKWGADV  
WWRGQMGLGSAI PRNHADI DECKEPKKYPCYGNCKNI PGHFDCTCPKGTRGNAFVEGA  
COKI I LTSGVRI AI QVAGALVGLFGLGWGI KYKQRI KKOALLROADEFFQOHGGOLL  
LEMMKVEGNAGFTLYERERI KI ATNNFNKAHI I GEGGQGT VYRAVI DGTTMAI KRCKEI N  
ESKKMDFVQELVI LCRVNHTNI VRLLGCCLOFEAPMLVYEFVONKTLQELLDLQSKRFH  
VTLGTRLRI AESADAFHLYSLPRPI LHGDVKPANI LLAEGLVAKVSDFGCSTI DEKTO  
VVPKGTGPGYI DPDYLL EYQLTASN DVYSFGVI LLELLTSRRPFSKERKSLTSMFQEAMAN  
GTLVELLDSDI VDEASMRVI QAAVL ANOCLVVPALADEVQOYPQPPLVLEDLSFTGI GR  
TSMSTWYGGSKTNGVYGLSKKAVPSI EFAR\*

>OsWAK43 4577.t00014, Chromosome 4, protein sequence  
MTSHRGLTTTTLCLAI AI AAELLAGRAEGQCQNTKCGDVEI PYPFSTSLDKCAASAFEFD  
CNDTGNGVYKPFYGNVEVLSVSLQLGQVRVMNHI SSSCYNLSSKEMSDTWQLNMTGTPF  
MLSDSNKFTVVGCTVAYI ADQDYVGKYM SGCVSVCRRGDVWKATNGTCSGI GCCQTAI P  
KGLDYYQAFFDDSSMNTSGI YNRTPCS YAVLMDSSNFTSTTYLTTFEFNNTYDGRAPMV  
LDWAI RSANSCEEAWKKMDSYACKSTNSECFNSTNGPGYTCNCSKGYEGNPYLEGPNGCR  
DI DECODSKTHCYGECRNKPGGFD CNCPAGSKGNATI PDGCRKDFRLPLKARLAI GAVI  
CVLVGLFSFLGWEVI RHKRSI KKOALLRQTHEFFLQHGQOLLLEMMKVEGNVGFYLYERG  
EI ETATSNFNKEHI I GEGGQGT VYRAALNGVNVAI KKCKEI DESRKMEFVQELVI LCRVR  
HPNI VKLLGCCLOFEAPMLVYEFVONKTLQELLDLHRSKRHFVTLGTRMRI AAESAELA  
HLHSLPHPI I HGDVKPSNI LLAEGLI AKVSDFGCSTI DENTQAVPKGTGPGYI DPDYLL EY  
QLTSKNDVYSFGVI LLELLTSKKPLSKDRKSLTLMFQEAMAEGTLFELLDSDMVDEASMR  
VMHQA AVLASQCLVPGMTRPTMVLVAAELRRLALADEVQOCPQPPLVLEDLSFVEMGST  
TSGVYSLEKKAVLSI EFAR\*

>OsWAK44 9632.t02820, Chromosome 4, protein sequence  
MASYGELTI SCLTAI AVAGAALLAGGAEAOCLHTCGGI DI PYPFGI GSDGDCALPFYNI D

OsWAKs-Supplemental Data 2[1].txt

CNNKKPFYRDVEVLSI SLQLGQI RVSTPI SSSCYNPF SkinnerMYSSGWGFNLSYTPFMLS  
NKFTVVGQSLAYI SDPTSNTYSGCASSCPGGKVV SATNRTCSRI GCCQI TI PRGMEFCK  
VSFGESMNTSGI YEHTPCSYAAI MDYSNFTFSTSNLTSLLEFNNTYSGRAPVKFDWAI WG  
PRDCVEAQKNLTSYACKSDHSVCLNYSSGAKSAYMCNCSKGYHGNPYLQGSNGCED NEC  
EHPESYPCYGECHNKDGGFDCFCRDGVVACI LSI LFGFLGWEVI RHKRSI KROALLRQND  
EFFQOHGGQLLLEMMKVEGNAGFTLYGRQEI ETATNNFNKANI I GEGGQGT VYRAVLGGI  
AVAI KMCKEI DENRKMEFVQELVI LCRVNHPNI VKLLGCCLQFEAPMLVYEFVONKTLKE  
LLDLQRSTRFHVTGLTRLRI AAESAGAF AHLHSLSHPI LHGDVKPANI LLAEGLVAKVSD  
FGCSTI DESTPAVPKGT PGYI DPDYLL EYQLTAKNDVYSFGVI LLELLTGKKPFSKERKS  
LTLMFQEA MVNGTLQDLLDSI VDEASMRVI HRVAVLASQCLVVP GTTRPSMALVVEELW  
RLALADELQRYPPQPLVLEELSFLDTGSTSGI YSLDNKAVLSTTFAR\*

>OsWAK45 9632. t02822, Chromosome 4, protein sequence  
MAFQFHTLLSAVTI WLGVAAATARLHA AVAGARAPPPPPPGNCQKCGDVI PYPFGVW  
NGSESDGCAVPGFYLNCDDVDDNHVYRPFHGNVEVLSI SLPTGOARVTNSI SSACYNTSSR  
DMDYNDWQI NFGTGLTI SDADNKFTVVGQTLAYI TDDDNMGKYTSGCVAMCQGGDLTS  
LATNGSCSGI GCCQTAI PRGLKYRVRFDTG FNTSEI YNVSRCSYAVLMESKAFSRTSY  
VSSLEFNSSNGGRVPLVVDWAI GNETCDKARRKVDYACVSHNSKCFNSSNGPGYI CNCS  
EGYQGNPYLQDQGHGCTDI DECADPKYPCSVPGTCHNLPGGFEC LCPRSRPKGNFNGTC  
ERDQTLHTGGKVAI GI SGFAI VGLVFLVREVI QHKRSI KROALQROTDMYFOHGGQI L  
LELMKVESAEFTLYDREKI EVATNNFAKENI VGKGGQGT VYKAVLDGTTVAI KRCNEVD  
ESRRADFVQELVI LCRVNHPNI VKLVGCCLQFEAPMLI YEFVONKTLQELLDLQSRKFH  
VTLATRLRI AAESANAL AHLHSLRPPI LHGDVKPANI LLAEGLVAKVSDFGCSTI DEKTO  
AVVKGTPGYLDPDYLL EYQLTAKNDVYSFGVI LLELLTGKKPLSKERTSLI PI FQGAMES  
GKLVELLDSI VDEANMGVI CQAASLASQCLANPSSSRPTMRQVAEQLRRLALADEVQQC  
POPPLVLDGLI LTEMGSTTSSWYTGSGTSGVYNLENNVVLSTEFAR\*

>OsWAK46 AK072627, Chromosome 4, protein sequence  
MSPHRGA AVASI CAAFYDSI WLLVLLLSTALAAETLDGAQAASSQCONATKCGGVDI VYP  
FGLSSSGCAMSPSFEVDCNNTGNGVQK PFLGYVELLSI DVQLSQARVRTRI SSSCYN I ST  
REMNFDDLWYVDLKDTPYRFSDSANKFTI I GCRTLAYI ADQDDVGKYM SGCVSVCCRREL  
TSLI NGTCSGKGCCQTAI PKGLDYYQVWF EQSMNTSGI YNRTPCSYAVLMEASNFSFSTT  
YLTSPFEFNNTYGG EAPVVDWAI NTANTCEEAMGNLTSYACKSDNAKCI NSSD TTGYI C  
RCQEGYQGNPYLKGPNQCQDI NECQHG ENYPCYGD CYNKP GSFD CVCHAGSSGNAAI QGG  
CRKDLLSPKTRLAI GVVASVLAVLFGFLGWEVI RHKQKI KROALLROTDEFFQOHGGQI L  
LEMMKADGNDGFTLYKRGEI ETATNNFSKAHVI GEGGQGT VYKAVI DGVAVAI KKCKEI D  
ESRKMEFVQELVI LCRVSHPN I VKLLGCCLQFEAPMLVYEFVONKTLQELLDLQSRRFH  
VTGLTRLRI AAESADALSHLHPHI LHGDVKTANI LLANGLVAKVSDFGCSTI DKRTQ  
AVPKGT PGYI DPDYLV EYQLTTRNDVYSFGVI LLELLTGRRPLSKERKSLTLMFQEARSN  
GTLI ELLDSI VDETSMRVI KRAADLV SQCLVVP GTTRPSMTLVAAELRRLAEAYEVKRS  
POPPLVLEDLRFMDMGSTTNTLYGESRTSGAYSLEKKAVLSI EFAR

>OsWAK47 9632. t02847, Chromosome 4, protein sequence  
MPFHMLASLLWLCGGI AAYCSAASAATCVRSCGGVEI PYPFGLD PACALPGFNLT CNI KG  
DGKPYKDV ELLNI SLTEGQVRMRMHI ANYCYNSTSGGMNGTGWSLNLTGTPFRLSDFGN  
KFTAI GCRTLAYLLADDVLT TGC VATCKADDLLRLPDGVCSGI GCCQTAI PKGLQYYGVM  
FDSGFNTTEI NNMSRCSYAALMEASSFNFSKNYPTSSSFNDHYRGRAPLLVDWAI GNETC  
DVARYRCNCSQGFHGNPYLKPEDPDSCQDI DECKEPYKYPCHGKCRNKVGGI CASLVVAL  
TTLLGI EWI KYKQRI KQDI MRKRGEYFHLHGGQLTDMN I ENNI SFKLYDRDDI ELAT  
KGFDKTSI I GEGGQGT VFKGYNLDOVNNPVAI KKCKGFDENSRTFTQELLI LSRVNHEN  
I VKLLGCCLQFEVPVLVYEFVPNKTLHYLI HSQNDPSI RTLEI RLKVA AESAEAFSYLHS  
LDHPI LHGDVKSMNI LLSNNFI AKI SDFGCSKI RAADGHDDVVKGTI GYLDPEYLLKFEL  
TDKSDVYSFGV LLELLTRRTPLSKOKVSLASVFOEAMKEGLFLELI DTEI LHEDNMGLI  
GDLARLACQCLAMTSESRTMCR I AEELRRI EKRVRQHRGVLTTI SSMSLLASSSADTSL  
HFTGETNGYNSLRSAAMS I EFAR\*

>OsWAK48 9632. t02849, Chromosome 4, protein sequence  
MLWLAI AFASLELGLI TGGAVAEC PDTKCGSVDI PYPFSI GPGR CAMPGFELACKNSRPF  
LGDFEVVNI SLQLSQLRVLNKI SSFCYNPASKLMEPNTFQSDLDTPFMLS DTGNKFTVI G  
CRTLAYI ADKDNV GKLM SGCVSACRRGDVTSATNGTCSGVGCCQTTI PKGLPYQVFFDQ  
AFNTSDSI YNATLCSYAVLMDSSDFKFSTSYLTSPEFN TSYGGRAPMLLDWAI RTVNNCD  
EAQKNLTLYACKSDKFNSSNGPGYI CNCTNGYQGNPYRODGCQVETGLDGRGSRNVK  
TGLDGRNRNRAAPQHFFDSPSDFDDDSHKNI CGETI KEYI GDRDLEYNTNDVI DAVVGDAV

OsWAKs-Supplemental Data 2[1].txt  
VAVVEDAVDVVDEASCRLI YQTRGVHLCGRVSGKLMKTTDDVESAKTI VLESSAA

>OsWAK49 5443.t00017, Chromosome 4, protein sequence  
MLTKGGDGETATGKPAAGSSGRQRWSSGVPRREAADGDRDDRGAERAI SVVPGGEEAVAG  
VWLGVADPREETAQSGVDRGGGATQMETANTAAI SGLVTCVFVGLFGFLGWEVI RHRQNT  
KKOALLRQTDEFFQOHGGQLLLEMMKVEGNVGFPLYERGQI ETATNNFNKAHI VEGGGQG  
TVYRAEI DGTI VAI KRCKEI DESRKMDFVQELVI LCRVNHPNI VKLLGCCLQFEAPMLVY  
EFVQNRTLHELLEDFQRNRSCHVTLGTRLRI AAESADALAHLSLPHPI LHGDVKPANI LL  
TEELVAKVSDFGCSTI DEKTQVAPKGTGPGYLDPDYLLLEYQLTAKNDLYSFGVI LVELLTG  
KRPLSKERKTLTSMFKEAMTDGTI KLLDSI VNEDNLRVI HQAAVLASQCLI I PGTARP  
EMRYVAEQLOQLAFADVEQQDPQPPLVLAGLRFTAEMANTRTTSSWQTDSKTTGVYSLEK  
NVRLCSRI T\*

>OsWAK50 AK111730, Chromosome 4, protein sequence  
MVSSMVLAAQLLLLCLLSLSSSSSSQI SPLKCPNSSVDI PFPFKI ATNSSLTSTPGFAI SC  
RQTGPMI LLGGNYSVLSI SLLEGYVRVTGQTVYSSQCHNNSQGI I DLTATNYMFSHTQNK  
FTAVGCDAMAMI RNSSDVVGNTNSTVMSRYSGGCVSFCASNGSI I SGECSGVSCCOSSVP  
KGLNKLDFEFTSI RDQLMPPTSAVSGSGSTRCSKAFI AEQDSYVFSRHDLYKDLGNLPMVL  
DWYI QGGNCKEASRSRQTYMCKENSICYEVEDGAGYRCNCSSGGYTGNPYI GCVDI DECND  
GNNYPCTHKCI NI AGGYNCTCPMGMTGDGKKQGI GCKRDTTMLSTVGGSLGLMAVLI VLG  
FWTYWI VKKRRLAKQKQRYFLONGLLLQQQI FTHOAPARI FTTSELEDATNNFSDDRI V  
GRGGYGTVYKGI LSDQTI VAI KSKLVDSQSQMEQFI NELI VLSQI DHKNVVKI LGCCLET  
EVPLLVEYFI SNGALFHQLHNTNLVPI SWEHRLRI ATETASALANLHLARKVPI I HRDVE  
SANI LI DENYTAKVSDFGASRLVPSNQTHVTTLVQGTGLGYLDPEYFYTSQSLTDKSDVYSF  
GVVLVELLTRQKPI SYHROEEGI NLASHFTALAAQNRLQEI VDCVVVKEAGMRHVNVVSH  
LI LKCLKLKGEERPRMVEVAI ELEALRRLMKQHLSLKSEKALRELMEQSAEDCOEMQLL  
QEESGOEKMSNI EPLKLYHRDSASDKCMESSPLLSMDLPW

>OsWAK51 9632.t04098, Chromosome 4, protein sequence  
MAYTSNAAAYRKGA SKGTGCRGLI LEKTASAKHTI ATAAVPSPPQCQSRGCDVDI QYPFGI G  
ANCSLAELFNVECKVQHG SKPFI GNVEVLNI SLRSTLRVLNGI STFCYNASGLMGGVH  
FRFNAKNTPFRFSDVYNKFTVI GCNTLAYI ADDGGTGYQSGCFSOCRDL SGLVDGSCSGM  
GCCOTTI PRGMYYNVTFDKRFNTSQI SRFGRCYAVLMEASFNFSTTYI NTTKFNGTN  
GGRVPMVI DWAI REKSCDI AKQNMTSYACLSNSECVA STNGPGYVCNC SHGYEGNPYLP  
DPHGCHGVI I GFI VLMI I AFCGQLVI QRRKLTKI KKEYFROHGGMI LFESMKS KKG LAFT  
VFTEAELI HATNNFDKSRI I GQGGHGTVYKGTVKDNMLVAI KRCALVDEROKKEFGQEML  
I LSPI NHKNI I KLLGCCLEVEVPMLVYEFVPNGTLFELI HGKNOGLQI SFSTLLRI AHEA  
AEGHLFLHSYAPPI LHGDVKTANI LLDENYMAKVTDGASI LAPSDKEQFVTMVQGTG  
YLDPEYMQTCQLTDKSDVYSFGVI LLEI LTGOVPLKLEGPAL ORSLSSVFLSAMKGNNLD  
SVLVSDI KGOESMELI GGLAELAKQCLDMCGANRPSMKEI TDELGRLRKL SLHPWVQVDA  
EMAPENLLGGPSTI NSGLEI ETSSTGYLGEERENLPMNPGSTYYAR

>OsWAK52 AK111909, Chromosome 4, protein sequence  
MHWLAVTAAGSEDLVFLVEMHWLA VTADFEDLLFLVEDEGCAAGAGHARRCLVELEGDLL  
RVVQRHAVGVAAGRPGAQSVRVYSAVGCAASVSRTMMV

>OsWAK53a AK111508, Chromosome 4, protein sequence  
MAKMMLYLLLLPLLLLTCTI FASYVHSMESSTSKCSNI PI PYPFGI LGGNPAPAQGFETC  
ASSGPMVRI NNI MFGI LNI SLLDGFVSI LASATSQCKRNSFSLEGNTFTFSDTRNKFT  
ALGCDMVAMLLNGSSGYSGGCASFCTKSNI I DGMCSGVACCOAPVPKGLKLELEFTNI  
TGQLSRPKEVNNTPTCGEAFI VEQNSYVFSSVDLSNTNRNPNQYRPVVLEWSI DGGYCEE  
ANRFMSYACKENSICYNSSNGI GYRCNCSLGFGQNPYLOGPDGCQDI DECTI KRPCTHKC  
I NTKGSFYCMCPAGMRGDGLKEGSGCNGI GTLLI GI VTGLALLLLLVL FWTHWLKKR  
KLAKI RQRYFMONGGMLLKQKMFSGAPLRI FTSSELEKATNSFSDDNI I GRGGFGI VYK  
GI LSNQMVAI KKAQRVDQNMEOFI NELVI LSQVNHKNVVQLLGCCLETLP LLVYEF  
TNGALFSLQNTSVLI SWEDRLRI AVETASALAYLHLATKEPI I HRDVKSSNI LLDENFT  
AKVSDFGASRPI PHNQTHVTTLVQGTGLGYMDPEYFQTSQSLTEKSDVYSFGVLI ELLTRQ  
KPI SDGRTDDVRNLACHFSMLFYQNQLLEI VDSQVAEEAGTKHVKTVAQLALRCLRSRGE  
ERPRMI EVAI ELEALRRLMKQHLVLQTEEDPLLCESGQHADVNI EASSEFEP

>OsWAK53b, AK111662, Chromosome 4, protein sequence  
MONGGMLLKQKMFSGAPLRI FTSSELEKATNSFSDDNI I GRGGFGI VYKGI LSNQMVA  
I KKAQRVDQNMEOFI NELVI LSQVNHKNVVQLLGCCLETLP LLVYEF TNGALFSLQ

OsWAKs-Supplemental Data 2[1].txt

NTSVLI SWEDRLRI AVETASALAYLHLATKEPI I HRDVKSSNI LLDENFTAKVSDFGASR  
PI PHNQTHVTTLVQGTGLGYMDPEYFQTSQTEKSDVYSFGVLI ELLTRQKPI SDGRTDD  
VRNLACHFSMLFYONLLEI VDSQVAEEAGTKHVKTVAQLALRCLRSRGEERPRMI EVAI  
ELEALRRLMKQHLVLQTEEDPLLCESGQHADVNI EASSEFEP

>OsWAK54 5380.t00019, Chromosome 4, protein sequence  
MVVVVVGALLFHLVVTALAAPVALPGCPETCGNVTVPPYFGI GHGCFRDGFELACDETHP  
AAPPKLRFARNGVEVI DI SLPSGTVRVATRMLGTDSSSSSLPQLNGSWPAGLPANGSLAV  
STRHNRFFVAMGCNLLANLVANDDDDDYI SVCAALCVVRSALPRDAAAASSCSGFGCCQTPV  
ARGLPSYGVHLNDLTQRSVTVGSYGAAFI ADGEWFAGEQSLQLGFVADPRKLADSTAVP  
TVLEWSLDMRDQDMFWYDTRVSQWTRCVSVHSAI DDAVDGNLYGRARCNCSSKGYEGNPY  
LANGCQDCGPCVDGPDCE\*

>OsWAK55 5380.t00020, Chromosome 4, protein sequence  
MARQGFPRFPVQTHHTNPHDGLI RLNKFVSRSFSAI GAVVFQLLVTTTTLSAAAPTPI A  
LPGCPESCGGI QVPYPYFGI GDGCSYHGFNLTCDDEAHHHQTTPPKLFMATDNGTVVQVLNI  
SLPDGTVRVRSKLSQSSI AGSSSSSSSNASSSRSDLPADGPFTVSSAYNWLVAFGCNI VAD  
LTPYGN I ADGSSCAATCI DGWQNFAGPSCSGI ARCRTSVGRGVHSYTI QVTSLI DRNSMG  
ASTSTTWAFAAEQGWFSANENAMLYNFTNWLPFTVESVPVLEWWLDLI RDGAI LPLS  
VGPNTTDFRCLSLHSSSYNDLNYDRRCNCSSQGYEGNPYI RDGCRDI DECOOPDVYPCH  
GTCTI NMPGTYRCLAKKSVKSLPGLI TI I AVSAGFGLLSLLGVAKI TNKI KQRRAKKLRR  
KFFKKNHGLLLQOLI SSNKDI AERMKI FSLEELDOATNKFDQNR I LGGGGHGTVYKGI LS  
DQRVVAI KSKI VVQREI DDFI NEVVI LSQTNHRNVVKLYGCCLETEVPLLVEFI SNGT  
LSFHLHGQENENPLKWKDRLRI ALETARAI AYLHSAASI SVLHRDI KSTNI LLTDTMTAKV  
SDFGASRSI SI DETGI LTI I QGTGYLDPEYYYYSSRLTEKSDI YSFGVI LAELLTRVTPV  
FSSETSERSTSLASYFVSFI RDNRLSDI LDSOI VNEVGAEDAKVAKLAEAELRLKGEERP  
TMRQVETTLEDVQRSKVQLNHQI ARVSNSTNLKNQTYEGSKCYEGTROYSLEKEFI QSSE  
FPR\*

>OsWAK56 2968.t00014, Chromosome 5, protein sequence  
MTSNI TLVFLMMCLAAAVAAAATPGVAGNGLLHTI PSKNSLAHCPSTCGDI GFSYPFG  
I GHGCFRQGFELI CDNTTHPPTLLANTTTKVI QSGRTLEVI EI PAI AFNI AMNNSI I  
DYI RYVWSPANGFTI VNESTLFVI GCGI EACLFDLDTNETMGSCI TMCSDNLGI MEMHDG  
DCTGI GCCHI I VRRELRRFWLKLDPDDRTTPRSYRVLSRAQVFI LPTI NSYQFNTNDLV  
SSSWMNTSSI GGTLLRGAI MDQETCPGASASKATYACTTNTNCFNATNGGYYCSCRNDVT  
DGNPYVNLGCSDDPGI TI GI GCGLGSI I LALGAI VLI NKWKRGVQKRI RRAHFKKNOGLL  
LEQLI LDEKAQDKTKI FSLEELEKATNYFDATRVLGSGGHGTVYKGI LSNQCI VAI KMSK  
I AEQTEI DQFI NEVAI LSQI I HRNVVKLFGCCLEAEVPLLVEFI SNGTLYDI LHSVSV  
KCLLSWDDRI RI AVEAAGALAYLHSAAI PI YHRDVKSSNI LLDNFTTKVSDFGASRTM  
SLDQTHVMTNVQGTFGYLDPEYYTQGLTAKSDVYSFGVI LVELLVRKKS I FI NDQGTKQ  
SLAHYFVEGHQGVVMEI LDSQVMEANREEI DEI VSI AESCLKTKGEERPTMKEVEMRL  
QFVRTI RQRKCQFPVTEGEI EHFPFPNTSNSSDGRFSHSTGLTCDSVSGSYSLEQQFSS  
SI NLPR\*

>OsWAK57 4374.t00003, Chromosome 5, protein sequence  
MLTKGGDGETATGKPAAGSSGRQRWSSGVPRREAADGDRDDRGAERAI SVVPGGEEAVAG  
VVLGVADPREETAQSGVDRGGGATQMETANTA I SGLVTCVFVGLFGFLGWEVI RHRONT  
KKQALLRQTDEFFQOHGGQLLLEMMKVEGNVGTLYERGQI ETATNNFNKAHI VGEQQGQ  
TVYRAEI DGTI VAI KRCKEI DESRKMDFVQELVI LCRVNHPI VKLLGCCLOFEAPMLVY  
EFVONRTLHELLDFQRNRSCHVTLGTRLRI AAESADALAHLSLPHPI LHGDVKPANI LL  
TEELVAKVSDFGCSTI DEKTQVAPKGTGPGYLDPDYLLLEYQLTAKNDLYSFGVI LVELLTG  
KRPLSKERKTLTSMFKEAMTDGTI LLLDSDI VNEDNLRVI HQAAVLASQCLI I PGTARP  
EMRYVAEQQLQALAFADVEQODPQPPLVLAGLRFTAEMANTRTTSSWQTDSTKTGVYSLEK  
NVRLCSRI T\*

>OsWAK58 4374.t00004, Chromosome 5, protein sequence  
MGEGRRGVGEEEEEEWDEEI SCSTACGDVKI SYPFGFEAGCSWPGFELI CRDTI KGKK  
PFLPPVTESVGYLELESI SLLDATRSTSPAEAYRLSDTENKFI I VGCYTVAYI TVGDRED  
MRYASACSAFCGPKGNLTSMDGACSGTGCEATI TEGHTSYNTMFDPDYNTTOI YNVS  
SCSYAVLMESSRFSFRSYVMNSSQFI DTNGGRVPMVVDWAVQNASNCVEAQKDHDSYAC  
I SSNSVCVNSSSGPGYI CNCTHGYQGNPYLLHGCQGEYVKFL\*

>OsWAK59 4374.t00007, Chromosome 5, protein sequence

OsWAKs-Supplemental Data 2[1].txt

MKKAYLDNCMTYAKMRVTWRCSKKLVKRSLESGRLKI RLERNNTFSKESCRYCI I NHPSL  
HVKEKASKSFQKTATVQONQSKDTRDYLKWYLCSTNANVEPHTGI CATLLVALTSLLGI EW  
I KYKORI KRHDLMRKRGEYFNLHGGQLLTDMMNI ENNI SFKLYDRDEI ELATKGFDKMSI  
I GEGGQGT VFKGYNLDOVNNPVAI KMCKGFDENSRTFTQELLI LSRVNHENI VKLI GCC  
LQFEVPLVYEFVFNKTLHYLI HSONDPSI RTLEI RLKVAESAFAFSYLHSLDHPI LHG  
DVKSMNI LLSNNFI AKI SDFGCSKI RAADGHDDVVKGTI GYLDPEYLLKFELTDKSDVYS  
FGVI LLELLTRRTPLSKQKVSLSASFQAMKEGLFLELI DTEI LHEDNMGLI GDLARLAC  
QCLAMTSESRTMSRI AEELRRI EKQVRQHRGVLTISI SLSLSASSSADTSEHFTGETNG  
YDSLRRVAAMSI EFAR\*

>OsWAK60 4374.t00015, Chromosome 5, protein sequence  
MAPSFVDCNNTANGFKPFVGNVEVI SLSNGQARVMNHVSSSCYNRTSRQMPADVWYLN  
LTGTPYRLSDSANKFTVI GCRTLAYTFDDYNVGKYMMSGCVSVCCRGLSSAI NGSCVGI G  
CCQTN I STGLSYYEVMFDYTLNTSGI YNRTPCSYAVLMESSSTFTSTTYLTSRAFNTSYG  
GOAPLVLDWAI RTANNCVEAQKNPASYACKGDYSVCLNSTNGPGYI CNCKKGQGNPYLQ  
DSNGCQGSFLHCQI MSLSARSREKQVKLRMSLCVPEGRAQHSWLRAGTKPRRLSSALG  
VVDQRSWSSSSSRKDI MSFAKPTDLPVLI FVPGKEPYNKFKGFYRAEYFKNNI QLGGLHGR  
KDI NECQDSNNYPCHGECHNKPGDFDCFCRAGSRGNATI PGGCRKDFLPLKAQLAI GI AA  
CVLAGLFAFLGWEVI RHKRSI RKOALLROTDEFFQOHGGQLLEMMKAEGNI GFTLYKRV  
EI ETATKNFNKAQI I GEGGQGT VYKAVLDGTVAI KKCKEI DESRKMDFMQELVI LCRVN  
HPNI VKLLGCCLQFEAPMLVYEFVENKTLQELLDLQSKRFHVTLGTRLRI AESADALG  
HLHSLPHPI LHGDVKPANI LLAEGLVAKVSDFGCSTI DEKTSMLKGTGPGYI DPEYLLEY  
QLTAKNDVYSFGVI LLELLTSKRPLSKESKTLASMFQAMMDGTFHELLESEI I DEASMG  
VLHQI AVLAI QCLALPGMSRPVMEQVAKELRRLALSDEVQOCPQPPLVLEGLNFAVMGSM  
CTTSLLYTEGNSTGVYDLEKKTVMSTEFAR\*

>OsWAK61 3015.t00018 Chromosome 6, protein sequence  
MGRGVRQI ACRHLTRDLTGHPMGALVLVATSLMLLI LQHSGASD GARAGSGSI WQPPDC  
PAPAKCGVNI PYPFGI REGCFRPGKGFNI SCKQEQAYI GPDI RVTNFDVVQSEARI LTD  
I PSGTVAWKYNNEFDPI AWTSRGGLRLGNHHMVSSAKNRFTAI GCSTVAFI YGRDKNGSN  
GQFDQFTSLCGSFCFDEGSI EDGPECSGMGCCQVPI STNLRRFSLGFYNYNTTKKVLNFS  
SRSYAFVVEKDQFKFSSYAKADNFMEELARGI PI I LOWI AGNETCKEAALKESYACVAN  
NSKCI DVI EAPGYRCNCTOGYEGNPYLKDGCRRVNI ADI NECNATRFNPNSCKGI CTNTDG  
SYDCI CI SI I FLI I CI STLLI KI QRMKLEKEKQRFYDQNGGHI LYQKI I SGQVNTVEI FT  
EEVLKNATNNFDSGQKLGAGGHI VYKGI LRDNNVVAVKRSNFLHVTDAEEFVQEI I MLS  
QI NHRNVVRLI GCCLEVEVPI LVYEFI SNGTLSYLI HGDSRRYASLKLRLRI AQESAEAL  
AYLHLSTNRPI I HGDVESLNI MLDDSYTVKVTDFGASRWLSNEAVEQI AMVQGTGRGYLDP  
EYLOERKLTAKSDVYSFGVVLLELI TGKKA I YRHGDGDFESLAGSFLRAMEERVENI LD  
TSLAGASMEALPLLQEVAKVGMCLSAKGERPSMAEVTDMKLAVRI AWRDLLVSSEYNV  
TEVFDVSSEAPPSGNPSSAVFWTPDMQSLEVETLR\*

>OsWAK62 3009.t00005, Chromosome 6, protein sequence  
MAFNLEGPENERSLSLSFLCAMEEGRLMDI I GHHI QDENAGVLEEVEANLASRCLEMI GN  
NRPSMRDVADKFGRLRKVMQHPWAQHDPEEMVQHSK\*

>OsWAK63 3009.t00012, Chromosome 6, protein sequence  
MDCYYKL PVEKLAMRLLLI FLVI SLOFMADGASLPDDRCLKKCGDVI LYPFGI GEGCA  
I EGFVLSCSKTEDGRGDVALYGTTPVLNI SLRYGQVRMKSTYI SSMCYNLSTKNMDYKNW  
LLNLTTSPFTI SQKENI FI VI GANTAANMFGYSRYSTMLNMI GCLSQCSYPNSFTAQDGS  
CVGI GCCQAVLSNNI SYHEVOFNPLYNTTTSYNNRSI TDRASYCGYAVVMEAAAFRFTA  
YLNSTAFWDEHNGSVPVVLNWWVGNETQVAKQMGDRYACRSKNSMCI DSSSGPTGYLCN  
CTEGYRGNPYLPDGCQDI NECDVNNPPPCPRCKNI PGSFTCSSPSQSRTVI LAVLSVG  
I VAMAMI VTCSYLVREKRLANI KKKYFQOHGGMLLLOEI GLKQGSTAFTI FTEAELI E  
ATNKFEDKNVLGRGGHGTVYRGMLKDSRLI AI KRCMSMI DDRQKKEFGKEMLI LSQI NHK  
NI VKLLGCCLEVEVPMLVYEFI PNGTLFHI HGGNDCRNI PFSTRVRI AHESAQALDYH  
SSAPPI I HGDVKTNI LLDENYTAI SDFGASI LVPTDEAQFVTLVQGTGCGYLDPEYMO  
TCQLTDKSDVYSFGVVLLELLTGKMAFNLEGPENEKSLSLSFLCAMKEGRLMDI I DHHI Q  
TDENAGVLEEVEADLASQCLEMI GDNRPMSMRDVADKLGRLRKVMQHPWAQHDPEEMESLLG  
ESSVAGLEMVSTGNFSMEGGAVQGI LESGR\*

>OsWAK64 9634.t04636, Chromosome 6, protein sequence  
MAMPLFLGLAVLTLLLATAAAAALPPPGCPRTCGGVAVEYPFGI GPNCSLSDGFSLDCVRD  
TPQLRLGPVKQQQTVRVLGVDLLHGKI RTTNAI ASQCLDARTGKLVNTSWEGLNAAALPY

OsWAKs-Supplemental Data 2[1].txt

RFSDDEDNRFFAVGCSGVVLLQGTAAAGADDRVVI GCI STCFGNASI RTGSCSNI GCCETAI  
PKGLNSYLLAMERMPGGSPVNRFCFYATLMEAAASFSEAAADAAADGFYRKSSNGTVPVVL  
FVVGSETCKEAQTSPTYACLSHVSVCVDGAPGYVCNCSSQYTGPNPYLPNGCVDI DECGPG  
KHGCPDGM CTNPPGGYNCSCPEGEYKSNKNGVLI CESDQKRSSLVSVI I VI GVSGGVV  
I AVI AI LI TYLMRQRALADVKKYFERHGGLLLYDELSTRPGNTFTI YMEEQLEQATNG  
FDDGNI LGRGGHATVYMG I VPAGGDGLVVAI KRCKVMDETNKKEFGKEMLI LSQVNHKNI  
VKLLGCCLEVDVPMLVYEFVPPNGTLYHLI HGGGGGGGGDGGVI SFATRLRI AHESAESLAY  
LHSFASPPI LHGDVKSSNI LDESFMKVSDFGASI LAPTDEAQMVTMVQGTGCGYLDPEY  
MRTCOLTEKSDVYSFGVVLLELLTGKKPLCLDGPPEERSLSARFVAAMGERKVGEMLDEQ  
VKREASGESLEEI TRLALECLQMCADRPAMKEVAERLGGLRKLHQHPWTQDAVELEEER  
CLLHGSPEYQLSARYTTGSR\*

>OsWAK65 9634.t04645, Chromosome 6, protein sequence  
MTKHHPMLLFLGLALLALQPLI AAASRRPPPSPLCPKCKGNVDI EYPFGI GPNCSLSDDF  
SLECVHDTPLRLGTDROQVVAVLDI NLLHGKI RI ANSI SWOCKDENDPTGAPLKNSSW  
MGLDVTLPYRFSYEDNQFVTGCVNLVLLSGEEASVDPI LNVCMSTCFGNGSNI RNYC  
SGAGCCEMAI PVGLKSYRLEFSGPLLFNNSWSPDNYTWCASHVLMKSFSEFERDYATTD  
KFFRNKNGTVPVVLNFAAGSEKCKEARMKDTYACVSDHSACVGTADGYVCNCTSGYKGNP  
YLPGGCTDI DVCAPGNDGCPDGM I CSNFPGGHNCSCPEGEHKSNSKGVLI CEPDLKRSLP  
DLKFKRSYRLPVSAI I AI GVTGGI AI I VMSFLSSYLHQRALADI KRSYFKRHGGLLLY  
EELNARKSNAFTI YTEQLEQATNGFDESNVLGRGGHGTVYKGVVAAAASDDLVAI KRCK  
LMDERNKKEFGKEMLI LSQVNHKNI VKLLGCCLEVDVPMLVYEFVPPNGTLYQLI HGGSGAG  
AI SFASRLRI AHESAESLAYLHSFASPPI LHGDVKSSNI LDESI MAKVSDFGASI LAPT  
DEAQMVTMVQGTGCGYLDPEYMQTCLTEKSDVYSFGVVLLELLTGKKPLCLDGPDEGRSL  
SARFLAAMRENADLI LDEQVKSEASGELLEI TLLALECLQMCADRPAMKEVAERLGGL  
RKLHQHPWTQDVVLEDEVRCLLSDSPESI SFEVDATSSSGY\*

>OsWAK66 9635.t00670, Chromosome 7, protein sequence  
MYDDRKDFNRI DGEFEVVPVLDGTI RNVYNYACRSSRRTPATARGTGAI APRATRATPY  
LDDGCTDI NECLHPKEYGCGYGNMNTPGGYTCVCPGTSGNPTEMNGCHSKDKFTFVVK  
RKLI RTKQKFFEQNVGVI LQQQMHSGGGARGFRI FSMEELKKATNI FAAGHVLGRGGHGV  
VYKGVLEDKTI VAI KSKMMKEAQTKEFARETSVAALKLKCPCWSTNSSQI TPSTTTSM  
GRTPKADI PLDI RLQI AAESAELSYMHSASPTLHGDVKMANI LLDDKLSAKVSDFGA  
SKLPPTDEI EI ATWVQGTCEYLDPEYLMTRQLTDKSDVYSFGVI VLELLTRKKVLYLDGP  
EEDRSLVSCFTTAVKVGHRH\*

>OsWAK67 3459.t00011, Chromosome 7, protein sequence  
MWMVLRVAVSGALLLLVVVGSSAAGAGSGSCQTRCGDVI LYPFGI GPNC SRGVGFEI  
ECNTRNGSGDLVPTLAATSLSI VQNLVESPPMAKVMLPVAYKCYNDPTKTQDFNGEVEL  
NKTGVYRI SDELNMLVVLVCNTMVYTKNGNSEGGLYPYLYYTGCI AYCNDRSRQAQDGKCA  
GAGCCHVDI PGGLTDNTLVFDSWNRTK\*

>OsWAK68 3459.t00009, Chromosome 7, protein sequence  
MKKMNEYFKKNGGSI LQKVDNVKI FSKDELKKI TKNNSEVLGOGGFGKVYKGTLDNTI V  
AVKTSI EVNEARKDDFTNEVDVPMLVYEFAANGNLQDI LHGDGNI PLPLHLRLDI AI ESA  
EGLRYMHSSTNRTI RHGDVKPANI LLTDKFI PKI SDI GTSKLLTVDKDFTMFVVGSMGYI  
DPVFHKTGHLTQKSDVYSFGVVLLELI SRKPTI YGENCSLI I EFQSYDKENSGRMMFDK  
DI EI EEDI LI LEEI GRLAMECLKEKVEERPDMKEVAERLVMLRRSRKGGQGSYSI SPQNF  
EEI SI EGTPKSFGAEI SESSNAAVSAPATPAN\*

>OsWAK69 2123.t00006, Chromosome 7, protein sequence  
MPLGPMEGPSLLFLSLLRFVPPVEMVERSEVVI VVADKGVDLGMRWNKLATTVLDRAR  
PSKGHGAWLMAAI KKTQWRLRASARRROLI PFDVKPCMC I HEVGPOGGADGAVACSRMD  
EEDPI DAAEAAAALQSVLQHDDGTAVFLLQWI KRDGVKRFVRODELSMERKRDKDDRGL  
VVNMI I VFI SSGDGI ETKEAAHACSLDVVSSRVESEMGRRSWEKTI AAATAATQYAGEAM  
AQYNNI FCATHMGDWYKLSQFRDTANEVLAKADI DPNVRCFTRQMKHI TNNYGTVLG  
KGGFSVYKKGKLDNGRSVAVKQYNWRTQKEFTKEAI I QSQCASHRNI VRLLGCCVEADAP  
MLVTEFVPNGNLSELLHGKSGQLPVSLERFQI ALDVAEALVYMHCSQNHPI LHGDI KPS  
NI LLGDKHVAKLCDFGI SRLLCMDNDEHTGFVI GSKGYMDPVYCETGRLSPKCDVYSFGV  
VLLELI TRKKGI DDQSRNLAMFARSSRDKRHELFDEI AADENI DFI EEI ANLALDCLK  
SEI EDRPQMKEVLKQLWSI KRSEI LRQERRLAELRERRI MTLREI KVMLRGSGFERFVTK  
AT\*

# OsWAKs-Supplemental Data 2[1].txt

>OsWAK70 2123.t00010, Chromosome 7, protein sequence  
 MTSSEKHKYNHI FCVTDMDGDWYDKLSQSFRDTAKEVLAKTDI DPNVRCFPKQMKRI TNN  
 YSTTLGRGGFSVYKGRLLDDGRSVAVKQYNWRTQKEFTKEGVAKLCDFGI SRLLSMDSD  
 YTGFEVI GSKGYVDPVFCQTGRLSQKCDVVSFWVVLLELFTTRKKGI DDMKVCLAEI FACSS  
 RKGDEHKLFDMDI VTNENMEFLQGI GRVALECI KFEVEERPEMRLVLEQLLSLKRSRDKS  
 I HEMLVVRKEI EVFLRGCGFGRFI LSKEVDLDI CNLKI VLKECASGKAYI GKSRGTPLM  
 AI KMSTAVTEKWKDMLGNEI AVQSRI KHMNVAKLI GYCLDHSDDGTGLI YEYGA SLYDVL  
 FGDAGKI YRPFTCDLRLKI AI GAAEGI AHLHPLGVVPGDVRI NELLVDHVSSSLEKI AGF  
 GTLGLPDI ERVLDL\*

>OsWAK71 2123.t00013, Chromosome 7, protein sequence  
 MGDWYDKLSQSFRDTAKEVLAKADI DPNVRCFTRQMKRI TNNYSTTLGRGGFSVYKGM  
 LDDGHSVAVKQYNWRTQKKEFTKEVI I QSQCASHNI VRLLGCCVEADAPMLVTEFVPNGN  
 LSELLHGNL GOLPVSLERFQI ALDVAEAVVYMHYSONHPI LHGDI KPSNI LLGDKYVAK  
 LCDFGI SRLLCMDNDEYTGFI GSMGYMDPVYRNPKQVSTSEAFSGKSSVLI QRAI GKI C  
 MGHLLKNI RFI VI KMSVEADEI WKEMFLYEMI KQSRI EHCNVAKLFGCCLDHVDAPVLVYK  
 YGDI GLHDALFGNAWQFDCPFACEI RLEI AVGAAEGLAHLHSLNVVHGVDVRTANVVDV  
 YSKSKLEMPGI TAFMAKI AGYGTQRLSLDKAKHEI FLTENI HYKDPHFLKTGLMAKEYD  
 VYGFVGVVLVELFAQNMVQMHVDVNMVLKELDGI PARCHHLKEI KKLASWCLASKVTERPAM  
 DKVVRCLRAVLTLNLQNLHDPNCCKSMYKNSAMQSEI TSAKSASS\*

>OsWAK72 AK069794, Chromosome 7, protein sequence  
 MGDWYEQFSQSFKDAKEMLAETDI DPNVKCFTRQMKRI SNNYRTI LGEGGFSVYKGR  
 LNDGRAVAVKYNWTKQKKEFTKEVI I QSQFSHKNI VRLLGCCVEADAPMLVTEFVPNGN  
 LSNLLHSNSSQFPVSLGTRLQI ALDVAEALVYMHSSQNHPI LHGDVKPSNI LLGDKDVAK  
 LCDFGI SRLLCMDNDEYTGFI GSRGYVDPVFCQTGRLSKSDVVSFGVVLLELI TKKKG  
 I DDKKVCLAETFARI SRKGNHGLFDMDVVTNENMEFLQGI GRVALECI KFEVEERPEMK  
 EVLERLWSLKRSRDRRI REMQVMVRSEI EVLWRRCGFGRFMI SKERMDDMTYYFKTVLKE  
 CASGKAYI GRFCNAQLLVI KMSI SVLDQWKNV VNNELNVQSRI KHWNDKLLGYCLDLWE  
 GLVLVYVEYGAMSLYDVLFDHARKVSPFI CGLRLKI AVGAAEGLAHLHSLGI VHGNVSTVN  
 I LLDLVLVVKVI SRNYPVKI AGYGTSGLPDI DKAQHTGFFMEDSLVTSHGKEHDVYCFGL  
 VLLTLFTWKKVSLQEAETVFEQLWDI GPPHDVNSEPEKPGQOLKEAI LRCRHLEEVKSLV  
 SRCLTSEVTKRPSMVEVAKHLKNI NDLHDSTACHELAI YQSRMLSG

>OsWAK73 gi |42407754|dbj |BAD08900.1| putative wall-associated serine/threonine  
 kinase [Oryza sativa (japonica cultivar-group)]  
 MAIHPACTSRPMKI HDFCKRTLADFDRQTAI LPPSHLACGI VVQQLQAGAAAAAAGGI SI EYPCFVEP  
 GCYHPGFNLTCNHSYSPRFLGDDGTQVLEI AI PQATVRI NSGRMVFNSTGNHAVNRSLLDQVGRPYFV  
 AASNRI ALLSCNARVDVRAAGRNNTSTKLLSCTAI CPTDDGGGATTI LDI GPEGPCSGI GCCETSML  
 LAGSSTAAYSI QVQNLQEQAVVLNRTDDLVLVDERFNYTLDMSTFGYSSPEELPARLDWYI NSSSACPLP  
 ASAPECRSAHSYCDSTYDNKAYI CRCSEGYEGNPYPVDPGCHDTDECSSGYCSYGECRNTPGSFI CNCPRG  
 YEGNPSPKDGCKDI DECARHDI YPCYGKCI NLPGDYI CLCNNGTYGDAKKKEGCI PMKQARDLGLRI GLG  
 VGGGTI LLLLALSAPFI SSKMKLRKMKRMKETFFRONHGLLLGRLVSNADI GQRMV MTLQELEKATDNF  
 DKSREI GGGHGHVYKGI LDLOQVAI KKSRI VVKREI DDFI NEVAI LSQVNHNRNVKLLGCCLETEVPLL  
 VYEFI SNGSLDHHLHVDGPI SLPWDDRI RI ALEVARALTYLHSATTI PI FHRDI KACNI LLDENLI SKVS  
 DFGASRYI PI EQTEVTTAVQGTI GHLDPMYYTGHLDTKSDVVSFGVLLI ELLTRKRPYMRTHGESLVL  
 YFASLHRQGVVEI I DPOVMTEGDGDI QEVASLAATCTKLNGQDRPTMRDVENTLENLRVKKKLASHSV  
 KSSRCNAEI TKHYMLVTGQSGKEMSROYSMEEEMLLSERYPR

>OsWAK74 9636.t03854, Chromosome 8, protein sequence  
 MRVVFSLVLAALLQLLLGVATAAAANCSTHCGNI GI SYPFGVEPGCYHEGFNLTCDRS  
 HKPPKFLFGDGSVEVLEI SI PSGTVRI NSSSI VPVSTSSAVGTGSVNKTGKYHTWGLLRK  
 GGPFFI SPYKNKFLVLSCSNVQVLLGGDNSTVNACATYCPPAPKKGPQFQPMRNECSG  
 I GCCSAAI PKGYTSYSI QI QPANEI SEFDAESSVYI AEESYNATRLI FETVSALPALLD  
 WAI SNSTCGTKPSAAPACRSSNSYQNYTSYVYNGYQCRNAGYQGNPYI PNGCQGLS  
 I GLVSGGTVLLLLALCAPLATRKI KLRKMKKTKERFFKQNHGLLLQLI SOKVDI GERM  
 I I TLSDLEKATNNFDKSREVGGGHGI VYKGI LDLHVVAI KSKSI VVQREI DQFI NEVAV  
 LSQI NHRNVVLLGCCLETEVPLLVEFVSNGTLYDHLHVEGPMSPVWDDRLRI ALEVAR  
 AVAYLHSASSMPI FHRDI KSSNI LLDDSLTAKVSDFGASRYI PI DOTGVTTAVQGTFGYL  
 DPMYYTGRLLTDRSDVVSFGVLLVELLTRKKPFVHTSSNGDALVLHVFSLHTENNLVDI L  
 DPOVMEEGDGEVQEAALATCI KLKGGDRPTMRREVMALANI RVKKKHATLGTTSNRCD  
 GDQI VCDYLSTRGI TDESTROYTMEEEI LSSGTYP\*

# OsWAKs-Supplemental Data 2[1].txt

>OsWAK75 9636.t03855, Chromosome 8, protein sequence  
 MHVFAI ATLHLLQFLAAI PLI LSYNI ALPGCTDTCGNTTI PYPFGI GDERCFREGFKLVC  
 DPAYDPPKLFMNGPGYEVHKEI KLARRVLHLDGTI TQMLGGDSYNQKWI LDLDKLFVSA  
 DMNVFI TLGCGFHFFI GSSPAAAGDNATSSSNVSNCRPGYPI LATDGTCTYGI GCCNASV  
 VEDHNSYTI KLLSLQSSPRAVPFNASMVVVKGEWRRADNAMLLOQEVLSRLGAI AGAPD  
 AARNVGVRTVVNWMLGNSSCVEAKKLSDFGCLSDNNI NECMLPNPPLCFGKCI NTVGSYE  
 CI CPGGTSGNAHI QNGCVSSKLFSGLI I GI GLGGS LI I VVLI LTGI VVRRKFKSRRRAK  
 LKEFFFKQNRGLLLHQLVDKDI AERMI FSLEELEKATNNFDESRLGGGGHGT VYKGI LS  
 DQRVVAI KKSRYAI KREI DGTI NEVAI LSQVNHNRNVVKLFGCCLETEVPLLVEYFI PNGT  
 LHEYLHVNSAQSPWKERLRI ALEI ARSLAYLHSAASVSI I HRDI KTTNI LLDDRFI AKV  
 SDFGASRG I PI DQNI VTTTI QGTFGYLDPEYYRKSRLTEKSDVYSFGVI LAELI TRRRPT  
 SYI SPEGFNLTEQFI LLVSEDRLLEI VDSQI TKEQGEEEAREVAEI AVMCNLNKGEDRPT  
 MRQVEVKLEGLQGA VNTI RGRRAVQLNSPLTEESDSNI VAVGDAGYHNSSRRLSMEEEFW  
 SSMSFPR\*

>OsWAK76 AK067363, Chromosome 8, protein sequence  
 MRDKFFMONHGLLLQQLI SRNTDFAERMI I TLQELEI ATNNFDKSREVGTGGHGVVYKGI  
 I DLHVVAI KKSRI VVQREI DEF I NEVAI LSQVNHNRNVVKLLGCCLETEVPLLVEYFI SNG  
 TLYHHLHVEGSI SLPWDDRLRI ALEVARALSYLHSSASMPI FYRDI KSSNI LLDDNLTAK  
 VSDFRASRYI SI NETGI TTAVQGTI GYLDPMYYTGRLT SKSDVFSFGVLLMELLTRKKP  
 I GGTFDNGDGLVSHVI SLLSKGNLYNI I DSQVKEEEDGEVLEVATLATTCTKFKGEERPT  
 MREVEMALESI VSKKSSFCNKNSQSSSRSDENRI LALYMSI EGVTKDKTI TI TESSTEGE  
 I PLSSRFSR

>OsWAK77 3081.t00013, Chromosome 8, protein sequence  
 MEKRRMLRAKQRF FEQNGGLLLQQQLGSLAASGVAFKI FSEEEVSKATDGF AEARVLGRG  
 GHGVVYRGSLADGSTVAVKRSRVVEEKQLREFSREMLI LSQI NHRNVVKLLGCCLEVOVP  
 MLVYEVYPNGSLHRYI HGGGAGAGEGLSPADRLVAAESADALAYMHSSASPP I LHGDVK  
 SANI LLDAGLTAKVSDFGASRLAPAADEAEVATLVQGTCTGYLDPEYLLTCLTSKSDVYS  
 FAVVLELLTGRKAFCPPPPSAAGSQDDDDDDDDSLAFFFLTAHKGRHREI MDGWVRE  
 EVGGEVLDNAAELVMQCLSMAGEERPTMKEVADRLAGMRSRASDS\*

>OsWAK78 3081.t00017, Chromosome 8, protein sequence  
 MDRFAMPQCVSVDLVHRHSPI GVAMLLADRSVMAI QOPRALNYEGSRNHTQREREGATRV  
 MEVFLVWRALVWLALI TPAAALAQEEA PGCRRRRCGNVTVPYPFGI GSERCYRGGVGRFR  
 LDCDDARRPPRLTVAGYGHVTSI SLAAA ETVLLNASRACYGGGDYGRGRRGREEQPM  
 LNSGAFATFSSMKSFVAI GCPGLAYFVDDGGDYVTGCI ATSRSGLASYPRLRSFGRROG  
 GAFLANLACAYAFMVDAMWFWYAGSNFNRTGDFAVPVVLDWAI RPDAGSGSGSGSCAAA  
 SRTPLPSYACRSAHSVCI DSSNGPGYI CNCTAGYHGPNPYVVGDCDTI NECEHKDEYPCYG  
 VCTNTAGSYACSCPKGSSGNASVEGGCRRDDKFTLALKTVTGNI TFYTSRNNLSLEKAVT  
 DKPAA\*

>OsWAK79 9637.t01754, Chromosome 9, protein sequence  
 MAGGMSDGSGAATTAGGVGDGSDAGGNSNCVDDI KGGYRCKCSHG YEGNPYI KDGCKDI  
 NECLDNATYPCMG I CKNTI GSFDCSCYPGSYMKNGFCLPNQKSTFPARHVI GASVGFVI L  
 VI AI TFACYVQORRKLOHI KNNYFQOHGGLI LFEEMKSQOGHAFKI FSEEELOQATKKFN  
 EQEI LGQGGNGI VYKGLLKSNEVAVKKCMTI DEQKKKEFGPMLVYEFI PNGTLFHLI HE  
 NHGNI SLI TRLRI AHESAEALAYLHSCASPP I LHGDVKSSNI LLDNNFSAKVSDFGASI  
 LAPTDEMQFVTLVQGTCTGYLDPEYMQTCQLTDKSDENKLEDMLNDQI KNNENMEFLEEMA  
 ELARKCLDMSSI NRPSMKEI GDELGRLRKVMEHQCARQNPEEMESFLGDSSYVI NSTVES  
 TKSFSI EKNAMKRLKSGR\*

>OsWAK80 9637.t02571, Chromosome 9, protein sequence  
 MASRPPLLLQYSSLLLLCLAVSAPPAAGNPAPVAAVSKPGCPTKCGAVDI PFPFGI GE  
 HCGLEAPYTNYPFKFDCKPVDGTSKPF FRGMEVTKI SMEDGKAWMKMNI SKNCYNQSTGT  
 REDNTNTTSVSFSRSPFWI SDRDNKI I VI GCETFSYMQI NNVSKTTLTCELEVLTGCVPS  
 CRNDPKDGI CSGEAGCKLDFPNGTWYYSTYFSKRNNNSSPCSF I TVMETTTTFNFKNYF  
 NSTTFYD TYNGLAKVSLDWI I TMDSCDRVKRNTTSYACI SGKSRVDDPKGGYRCKCSDG  
 YEGNPYVKDGCKDI NECLDNATYPCPG I CKNTLGNFTCSCYPGNYMMNGI CI PNQKSGFP  
 KNLVI GASVGAVLLVI I VTYACFI REKRKLQYVKRRYFRQHGGMLLFEEI KSQOGI SFKI  
 FSEEELOQATNKFDKQVLDGQGNATVYKGLLKGNTI AVKRCI TI DMKQKKEFGKEMLI  
 LSQTNHRNVVKLLGCCLEVEVPMLVYEFI PNGTLFSLI HGHNHQHI SLDTRLRI AHESAE



OsWAKs-Supplemental Data 2[1].txt

ALAYLHWSWASPP I LHGDVKSSNI LLDKDYVAKVSDFGASI LAPTDESQFVTLVQGTGCGYL  
DPEYMQTCQLTDKSDVYSFGVVI LELLTRKKAFLNLESPEDERSLAMRFLSAMKEKRLSDI  
LDDQI MTGDNLEFLEEI AELAKQCLEMSGENRPLMKEVADKLDRLRKVMQHPWAOQNPEE  
MESLLGDSSYEI NNSTVENTGNFSI NSELQCLESGR\*

>OsWAK81 AK060211, Chromosome 9, protein sequence  
MKGTAFKI FTEEELQKATNNFDEKKI LGHGGHGTIVYKGFNLNGNTEVAI KRCKTI DEQKK  
EFGKEMVI LSQVNHKNI VKLLGCCLEVEVPI LVYEFI ANGTLFHLI HDGHGRHI SI STRL  
QI AHQSAEALAYLHWSWASPP I LHGDVKSSNI LLDGDFTAKVSDFGASI LSPTDDAQFVTF  
VQGTGRGYLDPEYMQTWKLTDKSDVYSFGVVVLELLTRKKPLNFDGLEDEKSLSVRFLSAV  
KENKLEEI LDDQI KSEENMEI LEEI AELARRCLEMCGENRPSMKEVAEKLDRLRKVLHHP  
WALHNLEEAESLLGESSI VSSEVVSTGNFSI EKKSLI GLESGR

>OsWAK82 AK111541, Chromosome 9, protein sequence  
MLVYEFI PNGTSLNLI HGNHGOHI SLVTRLRI AHESAEALAYLHWSWASPP I LHGDVKSSNI  
I LLDVNFMAKVSDFGASI LAPLDKSQLVTLVQGTWGYLDPEYMQTCQLTDKSDVYSFGVVI  
LELLTRKNVFNLDAPGNEKSLSMRFLSAMKENKLENI LDDQI SNEENMEFLEEVDLAK  
QCLAMCGEDRPSMCKVAEKLDRLVKVMQHPWTQONPEELESLLGESSYI I SSGASSTGNF  
SI EKKVVKDLASGR

>OsWAK83 9637.t02576, Chromosome 9, protein sequence  
MAKLLLSALLI CI SAI WVVAADVPAGRRGCQTRCGNLDI PFPFGI GDQCAI HGGFGLDC  
KNDSGTYRTFI GPFEVTKI SVPDAKAWMKMI SWQCYDPVTQMNDSMVGNFTNTPYRF  
SYEDNKI FVI GCNTMAYMRGVSYVI GCLSTCSDEPTNGSCSGAGCCSVDPDLGYVEAY  
FNKDYNTSQI WNYSRCGYLVVMEKAAFRYSTTYI PSI NFWNDYNGTVPVMDWVI RRET  
EEAKRDMSSYACVSDNSDCHNSTNGHGYLCKCKSGFDGNPYI KDGCKDI NECLDNTTYP  
AGLCQNTMGGYDCSCHQGHKVEDVCPDQKNQKSSWEMPVVGASVGFVI LVI I ATCSYL  
I HERRKLOHI KQKYFKLHGGLLLFQEMNSNERKSFTI FSEAELQHATNKFKNQI LGHGG  
HGTIVYKGLLDKNTI AVKKCMTMDEQHKKEFGKEMLI LSQI NHI NI VKLLGCCLEVOVPM  
LVYEFI PNGTLCNLI HGNHGOHI SPVTRLRI AHESAEALAYLHWSWASPP I LHGDVKSSNI  
I LLDVNFMAKVSDFGASI LAPL NKSQVTLVQGTWGYLDPEYMQTSLDLI ELLTRKNVFN  
LDAPENKSLSMRFLSAMKENKLENI LDDQI SNNENMEFLEEVDLAKQCLAMCGEDRPSM  
KEVAEKLDRLI KVMQHPWTQONPEELESLLGESSYI I SSGALSTRNFSI EKKVVKDLASG  
R\*

>OsWAK84 AK119296, Chromosome 9, protein sequence  
MKLOYTRAVLASLFCVCLSAVWVAATADI PAGQRPQPCPERCGDVEI PFPFGI GKHCAMQ  
TKYFDLDCLDVNGTKKPFYNNNEVTI SVQEGKAWMKLGI SSQRYDHVTGHI LYDSNAT  
AEFGDSPFWLSTENKI I VI GCQTMAYMESNAYVI GCFSTCNGSTPVNGSCSGGGCCQMDV  
PGHI YSYDGYFDEYNDISKI WRSSPCSMAVMEKAFQFSTTYLNSTVFI DTYKEGVPV  
LDWVI TLDTCCEKAKSKTTSYACVSTNSI CNDDPSGGYRCNC SHGYEGNPYI KDGCEI NE  
CLDNVTYPCPGI CNNTMGSTCSCHQGNMENGTCI PNRKSGFLALPI VGWFPSSVI TRT  
NDNANHLCTPI

>OsWAK85 AK071360, Chromosome 9, protein sequence  
MEVAVKRCMTI NEHQKKEFGKEMLI LSQI NHKNI VKLLGCCLEVEVPM LVYEFI PNGTLF  
DLI HGNHGOHI SLATRLQI AHESAEALTYLHSCASPP I LHGDI KSSNI LLDRNLI AKVSD  
FGASI LAPTDESQFVTLVQGTGCGYLDPEYMQLCQLTDKSDVYSFGVVLVELLTCQAFNL  
NAPEHEKSLSMRFLNAMKNNKLADI LDDQI KNSNMPFLEEI AELAAQCLEMSGVNRPSM  
KHI ADNLDRLRKVMQHPWAEQNSEELESLLGESSMVSSRYTSTGNFSI ERKGMELDSGR

>OsWAK86 9637.t01417, Chromosome 9, protein sequence  
MPGNYVVVVVLSLALVLLLPLFAAVDDGMRSGGKCTNSCGNVGFEYFPGVEDGCIYRG  
GGFNLTCHNTYQSPRLFLGDGVSQVLDI SVPHGWALI NNTGMVFNSTETRVVLRNRTWDQ  
VGGPYSLSGSNKI ALVGCNARVDLRARVKVKGGRGGDDDTGSNLI SSCTAVCPDLDEM  
TPVFAI GSGSSAACSGVGCQADI NLDI PSSYTI QI HNLQELGSI SPTDLVFI SKEEF  
SYTNDMAFGNNI PQALPALLDWYI SSDPSECTYESAPDCLSANSFCHAYDLGYKCHCSDG  
YQGNPYI RGGCHDI DECKSPQDYSCYGN CNNTPGSHI CDCPRGYERNASTPNGCKDI DEC  
GHRETYQCYGECI NFPGGFDCLCYHGTGDPRKEGGCLPVKHHLSARDLGLFI GLGVGSG  
TI LLLI AVGAPFLSRKMKDRMRI AVEVARALTYLHSAATVPLI AKVSDFGASRYVPI NQT  
EVTNAVQGTI GYLDPEYYYTGHLMKSDVFSFGVLVI ELLTRKRPTYRTDQGDLSVLHFA  
SLLRQGLVGI LDPQVLTEGGGEVMEVALLAGMCTRMGTQDRPTMREVEMGLENLRVSKK  
LASHDTASSSLVSQMAEHRMI ATGDMEESSI QYSMEK\*

# OsWAKs-Supplemental Data 2[1].txt

>OsWAK87 AK099582, Chromosome 9, protein sequence  
 MVQNFSKFSLSDI DECALPEEYPCYGECTNKPFSFSCMCPGGTHGDAMNEGGCEPTLLV  
 AI GGTI GI GI PSVFI GMAMTNMI KARRAKKLRAVFFKQNRGLLLLQVVKVI AERMVFT  
 LEELEKATNRFDEMRKLGSGGHGTGYKGTLPDRRVVAI KKSNI TVRKEI DDFI NEVVI LS  
 QI NHRNVVRLFGCCLETOVPLLVYEFI SNGTSLDHLHVEGPTLLSWKNRLRI ALEAASAL  
 AYLHSSASVSI I HRDVKSANI LLDGRLTAKVSDFGASRCI PVDQGGVTTVI QGTFGYLDP  
 EYYQTSRLTDKSDVYSFGVI LVEMLTRKKPTVFESSDNVSLI ALFNLLMVQDNI YEI LDP  
 QVI SEGMENTVKEVAALASACLRKGEERPTMRQVEI RLERLLGGDI LQGLSAELHCLPPO  
 LSNTDTTSKLYNMRDFLLSSSFPR

>OsWAK88 4967.t00009, Chromosome 9, protein sequence  
 MTMLPATAAALLVLVLQLMWSAEQAVGSGPPAGCPDRCGNVSVFPFPGI RDGCSLEGF  
 GLTCNTTNSPPRLMI GNSTLQVNI SLANSTLRAVDI DGAUNI TYGQI DGNGTWVGCVAS  
 PYI VNETLNQLLVTCNI QVTLVGSGGNI SGCSSFCSI NDMYTGGVFRSPGNKCAGI GC  
 CQQQVSI GRPSYRVELTNLDRDREFSGRVPEAVRI AELGWFDGLAADLLNVSLADTSRRN  
 PVPVVLWDVAVASTGLDVTNLNAGLNKQAANNWSCPTAASGRKSACI SSNSFCRNI ADNYRS  
 GYVCRCDKGYDGNPYVAGGCQDI NECERAKENGCFGECTNTPGAFLCRCPHGARGNATI P  
 NGCTKSNLGLTI GVGI GSGAGLFI LALGAVFLTRRI KQRRARTLRQKFFKQNRGHLLOL  
 VSQKADI AERMI I PLAELEKATNNFDESRELGGGGHGTGYKGI LSNLHVVAI KKSNTVQ  
 REI DEFI NETEVPLLVYEFI SNGTLYHHLHVEGPTSLPWEDRLRI ATETARSLTYLHSAV  
 SFPI I HRDI KSHNI LLDGSLTAKVSDFGASRCI PTEQNGVTTAI QGTLGYLDPI YYYTGR  
 LTKSDI YSFGVLMELLTRKKPYSYSAEDESVAHFSTLHAQGNLGI LDAQVI EGT  
 KEVNDVATLAVACAKLKAERPTMRQVEMTLESI RQEVLSVSTKSKELHVSWNHAI SE  
 GSI FYQAVDTSI VI VSDVGSSDNLCDGAVI GRNRFPGTQCRQ\*

>OsWAK89a gi |52077053|dbj |BAD46085.1| putative wall-associated kinase 4 [Oryza  
 sativa (japonica cultivar-group)]  
 MATSPSALHMQAVALGAFFLLSCLASAOQPPAPGCLDKCGDI NI TYPFGVGGAHCFRDKSFQLECNVVV  
 NNSHPRLI MPAYNQQLLSLSPDGEALAALDI QHEAYYYNCNASHPTASASSQPNMTFATLNKSTVYRFP  
 VSTYRFNATTNSYVVPVALDVAI RDVHNCSSAAKLNATNYACRSANSKCSDDTDGAGYRCRCSSGGYEGNPY  
 LHAGCQGLTTGSI I GI GVGSGAGLLVMALGAFLTRNI KNKRARI LROKFFKQNRGHLLEQLVSONADI A  
 ERM I PLAELEKATNNFDESRELGGGGHGTGYKGI LSDLHVVAI KKSQVAVQREI DEFI NEVAI LSQI NH  
 RNVVKLFGCCLETEVPLLVYEFI SNGTLYDHLHVEGQPSLPWEYRLRI ATETARALAYLHSAVSFPI I HR  
 DI KSHNI LLDVSLTTKVSDFGASRCI PAEQNGVTTAI QGTLGYLDPMYYTGRLTEKSDVFSFGVLI EL  
 LTRKKPYSYRSPQDDSLVAHFTALLTHDNLSI LDPQVKEEGGKEVNEVAVLAVACVKLKADERPTMRQV  
 EMTLETVRSSLLRQELVPSVAAEESKEKHVSWSYPVSEGTSI ESSRQYSNDEEYLLSSRYPR

>OsWAK89b gi |52077054|dbj |BAD46086.1| putative wall-associated kinase 4 [Oryza  
 sativa (japonica cultivar-group)]  
 MAVALAI LLVGLAPATPLSSAQPPGCPSTCGNI SI PYPFGI GAGCARDEGFQLECNHTSSPPLLI VSNS  
 TGGRHRQQLLSLADGEARTFLTAKRRCYNSSGDMVSENDONATEMSLGTYPYRFSRSRNLVALGCP  
 NLAYLVDGRGSI SSCTSI CRTPESVAGSTVGFTGEGCCQSSI PYSVDVYKPI I GFKQGGAGDSVLLN  
 STAASSI LOSSTVCRYMYLAEDRWI DAAYRDGAVDFNRTDDFAVHVLDWAVRNAGNCSAARNRLAAANY  
 ACSADSVCVDTGDGDGYRCNCSKGYEGNPYHDGGCKDI NECERAKEYPCFGVCI NTLGSYQCSCPPGTS  
 GNATI QTGCVKTNQALTTGSI I GI GVGSGAGI LVMALGATFLTHRI KNRRARMLRQKFFKQNRGHLLEQL  
 VSQKADI AERMI I PLAELEKATNNFDESRLGGGGHGTGYKGI LSDLHVVAI KKSQVAVQREI DEFI NEV  
 AI LSQI NHRNVVKLFGCCLETEVPLLVYEFI SNGTLYDHLHVEGPTSLPWYRLRI TTETARALAYLHSA  
 VSFPI I HRDI KSHNI LLDGSLTTKVSDFGASRCI PAEQNGVTTAI QGTLGYLDPMYYTGRLTEKSDVFS  
 FGVLI ELLTRKKPYSYRSPEDDSLVAHFTALLTHGNLGI LDPQMNEEGGKEVKEVAVLAVACVKLKAD  
 ERPTMRQVEMTLETI RSSSLQEVVPSVAAEESKEKHVSWSYPVCEGTSI ESSRQYSYEEENLLSSRYPR

>OsWAK90 4967.t00013, Chromosome 9, protein sequence  
 MVMLFPSPATAALLVLVLLLLQLLWSAEQAVGSGPPAGCPDRCGNVSVFPFPGI RTG  
 CSLEGFLTCNTTNSPPRLMI GNSTLQVSI SLANSTLRAVDI AGAVNI TYDVVSGTTGN  
 GTWGGVAATSTNPYVSGELNQLLVACNI QVTLVGSGGNI TGCSSFCSI NDKYTGGVF  
 RSPGNKCAGI SCCQTPSI GRPSYSVKVTI MDNEYRGEVPEAI RI AELGWFDGLAANLLK  
 KPAANDTSLRTPVPVVLWAVASTGLDVTLDAGLNQAANNWSCPTPGEARRSACI SNNS  
 YCHNVTDNYSRGYVCRCDGDDGYPYVAGGCQDI NECERPKEHGCFGECTNTPGAFLCRC  
 PHGARGNYSI PNGCTKSNLGLTI GVGI GSGAGLFI LALGAVFLTRKI KQRRARTLRQKFF  
 KQNRGHLLOLVSQKADI AERMI I PLAELEKATNNFDSRELGGGGHGTGYKGI LSDLHV  
 VAI KKSNTVQREI DEFI NEVAI LSQI NHRNVVKLFGCCLETEVPLLVYEFI SNGTLYHH  
 LHVEGPTSLPWEDRLRI ATETARSLAYLHSAVSFPI I HRDI KSHNI LLDGSLTTKVSDFG

OsWAKs-Supplemental Data 2[1].txt

ASRCI PAEQNGVTTAI QGTLGYLDPMYYTGRLEKSDI YSFGVVLMEELLTRKKPHSYRS  
AEDESLVAHFTTLHAHGNLGD I FDAQVMEEGKKEVNEVAVLAVACVKLKAERPTMRQVE  
MTLESI RSSLQOEVLHSVSTKSKELHVSWSHAI SEGTSLDSTROYSLLEENLLSSRYP  
R\*

>OsWAK91 AK107166, Chromosome 9, protein sequence  
MAMAMAMALLLLLLLQLWSVEAQVAAPPPASCPDRCGDVSVPYPFGI RDGCHLPGFRLTC  
DATHTPPRLMLGNGTLQVVDI SLANSTVRALDLGAVNFTYDVSKLAPSGSGTWSSLGT  
AGAGPYVVEQNRNLVVTGCNVQATLAGENTNI I GGCSSFCPVSEMFTSVAATVPVVP  
GADNATDGGFI CSGTSCCETPI AI GRPSYLVQFLSLDONQELTGKLPVAVRI AERGWFEG  
VAGELLNTSSDSAAALRTPVPVWLEWVVSPTLEAVLQGVGTQFADDRNWSCPADAARSAC  
RSSNSFCSNVTGNRYRGYVCRRCRGYGGNPPYVAGGCLDI DECKLAGRCYGECTNTPGDYQ  
CRCPRGARGDPRI PNGCVKTNLGLSVGI GVGSGAGLLVMGLGAAFLKRKVKKQARMLRQ  
KFFKQNRGHLLOQLVSQKADI AERMI I PLSELEKATNNFDRSRELGGGGHGTVYKGI LSD  
LHVVAI KKSKEAVQREI DEFI NEVAI LSQI NHRNVVKLFGCCLETEVPLLI YEFI SNGTL  
YHHLHVEGPMPLPWEDRLRI ATETARALAYLHSAVSFPI I HRDI KSHNI LLDGSLTTKVS  
NFGASRCI PAEQTGI TTVVQGTGLGYLDPMYYTGRLEKSDVFSFGVVL I ELLTRKKPYS  
YRSPDDESLVTHFTALLTQGNLGD I LDQVKEEGGEEVKEI AVLAVACAKLKEERPTMR

>OsWAK92 AK102702, Chromosome 9, protein sequence  
MQRQAGGFI SMAWSMPPLALFAAVLALQQAIAAAAAAGDCPTTCGDVAVPFPFGI GAGCY  
HLPGFNLTCDRSSDPPRLLLGDAAAFQVLNVI VNATVRAARVGGI NI TYGGGNTSSADE  
GRGAWRGLDGGPFALSEDRNELVVWGCDDVALLTDGGGSGNSSNVTI SGCAFSCPGTD  
AGGOAI AAPAGSTMSLTEDRRCTGVGCCOMPI SVGRDSYQVRLRRLNPSPPQPPPPQAG  
DPTVLI AEQGWAEASRSTRGYPLVTFDETAVPVLLGMMI ASTRVGADGEVPVDSTCP  
ADAARSACKSSHSSCRNVSSSARAGYVCDGAGFHGNPYLATGCQDI NECERAEEHGCFCG  
ECI NTAGSFLCRCPAGMOGNYTQRNGCFRPPPLPARSSTGLSI GVGVSAAASLI LI VI MAI  
FI I RKQKRRRAKKI RQKYFKQNRGQLLOQLVAQRADI AERMI I PLGELKKATNNFDRARE  
LGGGGHGTVYKGI LSDLHVVAI KKSKI AVQREI DEFI NEVAI LSQI NHRNVVKLFGCCLE  
TEVPLLVYEFVSNGTLYSHLHVSGPRSLPWSDLRI ATETAKAI AYLHSSVSI PI I HRDI  
KSTNI LLDLTLTSKVSDFGASRCI PVDQTVTTKVQGTGLGYMDPAYYYTQRLTEKSDVYS  
FGVI LVLELTRKKPFSLHTPEGEGLVAHFVTSFTEGNLVGVLDLQI MEEADMKVVEVVAT  
LAVTCVNLRGEDRPTMRQVEMALEGI QASRENVSGNLSAEKLGESNNVARDFMPSQEGRS  
MTEGTRQYSLEEEFLSSRYPR

>OsWAK93 gi |19551099|gb|AAL91604.1|AC099400\_10, Chromosome 10  
MI FSKDELKKI TKNNSEVLGGGFGKVYKGLTGDNTI VAVKTSI EVNEARKDDFTNEVDVPMPLVYEFAAN  
GNLQDI LHGDGNI PLPLHLRLDI AI ESAEGLRYMHSSNTRTI RHGDVKPANI LLTDKFI PKI SDFGTSKL  
LTVDKDFTMFVVGSMGYI DPVFHKTGHLTQKSDVYSFGVVLLELI SRKPTI YGENCSLI I EFQKSYDKEN  
SGRMMFDKDI EI EEDI LI LEEI GRLAMECLKEKVEERPDMEKEERKMKKQTTNNVI VFPSRKKKQKRKED  
GRRFSGDQTAARVRLKFALNDRQQRNTYPLLVE

>OsWAK94 gi |19551100|gb|AAL91605.1|AC099400\_11, Chromosome 10  
MALRAVAVAGALLLVVVGSSAAGAGSGSCQTRCGDVI PYPFGI GPNC SRGVGFEI ECNTRNGSGDLVP  
TLAATSLSI VQNLVESPPMAKVMLPVAYKCYDDPTKTQDFNGEVELNKTGVYRI SDELNMLVVLGCNTM  
VYTKNGNSEGGLYPYLYTTCI AYCNDRSQAQDGKAGAGCCHVDI PGGLTDNTLVFDSWNRTK

>OsWAK95 3135.t00009, Chromosome 10, protein sequence  
MASLRLLAGVLLI LMSSAAVGI AGRPAGCOARCGDVI PYPFGI GGGCFRSAGFEI ACNT  
SNGGLVPTLAAANDTI QVQNLTVFPRPEVKVMLPVAYRCYNSSGNVTEQFYGDVELNKTG  
VYRI SDERNKFVVLGCNTVAWNKHGDSEGKGLYTSLYYAGCVTYCSDLSAKNGKCAGVG  
CCHVDI PPELTDNVVTFQOWPRGEQVDFSPCDYAFVLVDKEEYQFORSDLNMDRKORMPVW  
LDWAI RDVASCPAPEVETSKKNMPAGYACVSVNSTCVNSTNGLGYCNCSSGYEGNPYDD  
DPNKGCKDI DECAHPNKYPCHGVCNTPGDYECRCHTGYQPSGDGPKKQECSSKFPPAR  
LAVGI TLGLSFLI VVVLFTLMMLOKRKMKNKYFKKNGGSVLQKVDNI MI FSKDEVKKI LKN  
NSDI I GEGGFGKVYKGRLLKDDTLVAVKTSI EVNEARKEDFTNEVI I QSQMMHNNI I KLLG  
CCLEVDVPMPLVYEFAANGSLKDI LHGDANRLVPLSLDLRLDI AVQSAEGLRYMHSSI SHT  
I RHGDI KPANI LLTDKFI AKI SDFGTSKLLTADKEFTMVVAGSMGYI DPI FYMTGHLTQK  
SDVYSFGVVLLELI SRKPTI YDKNYSLVI EFQKAYDRENSGRALFDKEI AI EEDVLI LEE  
I GRLAMDCLKEI EERPDMEKVAARLMMRLRRSRNLGQENYNRFKSRLLLEVYHEGPSAGL  
AETKNLGNRLRPEASGEGREENHMGESHVRVKAARHYTGLTSQGPHRRASRAETVROKPR  
REGTGFAKYQTPP\*

# OsWAKs-Supplemental Data 2[1].txt

>OsWAK96 3135.t00011, Chromosome 10, protein sequence  
MAFWLI AAGGLLLLLLRFafaADGI TGCPDRCGDVDI PYPFGI GPNCsRGDGFdi ACNTTN  
STGVLVPTLAAARRHAI QVQKLTVFPRPEVKVMLPVAYTCYNSGGNVTRQFDGDVELNNE  
GVYRI SDERNMFVVI GCNTVAWNQHGDSSGGKGLYRNLYYAGCVTYCSDSRsAMDGKcAGV  
GCCHVDI PPELTDNVVYFEQWPRGEQVDFSPCDYAFLVDKEEYRFRRSDLKMElnRRMPV  
WLDWAI RDRRGNDSSVASCPAPEVEKKKPAGYACVSANSECVNSTNGPGYYCNCsNGYEG  
NPYDNDGCQGKNVCSCI \*

>OsWAK97 3135.t00012, Chromosome 10, protein sequence  
MAMLVRRDMVSLVKGI ASSQGGMEKSQRSDEKRNLLGGANLDVYKAHI WPLALDWSDMAM  
SLYAPMYADI NECDPSNKKDYPCYGVCKNI VGDYECsCHTGYQPSGGGPKKQECNPkFPV  
AAQLALGVSLGFSFLVVVVLFTLMMMLQRRKMNEYFKKNGGSI LQNVdNI VI FSKDEMKKI  
LKNNSEVI GQGGFGKVYKGRlKDNTLVAVTTSI EVTEAQKEDFTNEVI I QSRMMHNNI I K  
LLGCCLEMDVPMLVYEFAANGSLKDI LHSdASHLVPLTLDLRLDI AI ESAEGLRYMHSSI  
SHTI RHGDVKPANI LLTDKFVAKI SDFGTskLLTVdKEFTMVVAGSMGYI DPVFYMTGHL  
TQKSDVFSFGVVLLELI SRROTI YGKNRSLI I EFQeAYDOANSGRLLFDKDI AI EEDVLI  
LEEI GRLAMECLNEKI DERPDMKEVVARLMMLRRSRKLKQENYNI SRQOFFEENSI DELP  
KSFDDNSSSSSAELLSNLATKNSLTyrSTTGRD\*

>OsWAK98 AK105108, Chromosome 10, protein sequence  
MEEVSI HSQMSHRNVVELI GYCI GESTLMI VTKYI SKGNLDDI LHNSDI SI PLDVRLGI A  
I GCADALSYMHSMLNSGLI CHGDI KPANI LLDSNLTSKLSDFGVSRLLSGGVTOYTVH  
I KGSVSyMDPI YFHEGCLTPRSDVYSFGMVLELI ARKRVrkGDI NLI GGGEI FDAEI AN  
RSNMKI LKEMRKLAI ECLTLDI HKRPQMNvVAKRLRTLKKELKDMHGRYSEHI LASHRSW  
RKNDNOGPSYNsRMOLKKSLSI FKRNLSNSSKI LLGLGNMRI FTOEELNEI TONYsCLLS  
GGTSGKVYKGTLEDNTVVAVRI FSEALEGFEEAFI NGGMI LSQI VHKNI I RLLGYCLNAD  
CPAFVYEYAARGTLSDI LDGREDFPLHLRVKI AVETAeALEYLHSSAAGMI RHGYVAPSK  
TLVDDsFTPKLTGFSWAQRlNNDDSAI HDHDKYCVSLKLKTDVYQFGVLVLTli SRKNFA  
FYADHEHLVSQFLAAYKADNSGRAFFDDDI TTRSEDVALLEEI GKLLLKCI CLEI DQRPT  
MKQVAQHLRI I RRCWKNNCTADGASLVTN\*

>OsWAK99 3164.t00008, Chromosome 10, protein sequence  
MAAMI LI AVAVVVQOALI LAARAI GDGQPI TLAGCPDRCGDVSI PYPFGMAPGCFLDGFE  
VTCNRTFDPPRAFLAWGSPDSPFOGNADGYyLSDNDSVTLKDYWSLPVELVDVTLsRGEA  
RAYGAVTTDCAATNGTYHEFRRLTLVLSGSPFVFSASRNVLtGVGWDMEaQLTTSLASTG  
YRLNCASRLMFpETAENGSCSGMGCCeANVTAGLRI ASVTFAHKKNVFWSSNPcSYGMI V  
QKNWYNFTKEDLYGNQTLsRKHPRGVPFVLDFAI ANVSCPAQGOpPLDNYACRSSNSFCV  
NATSSPGYI CKCSdHYDGNPYI ADGCODI DECQLRI QPELrDVYPCSSDGI CKNRPGGY  
DCPCPKPGMKGDGKAGTCTEKfPLVAKVI VGVVAGLLVLATLVFVFLRKEKQKMREFFI R  
NGGPI LENAksi KI FRKEELKRI TKTYSHVLNGAFGMVYKGFLEQHPVAVKKsMKVDK  
TQKDQFANEVI I QSQVI HKNI VRLI GCCLEVDVPI LVYEFVSNGSLQDI LHGENKVPLTL  
DKRLAI AAESAeGLAYMHsKTSTSI QHGDVKPANI LLDDQFNPKI SDFGI SRLI ARDvTE  
HTNDVI GDNNYMDPVYRETGLLTnKSDVYSFGLVLFEI I TGKKAVYGGESSFVRNYLDTY  
LTEI RANKMLFGKEAEEDKI EHLHNLVVI SKECLDNNVDQRPEMTDI AERLQGI I RSRKF  
LN\*

>OsWAK100 3830.t00015, Chromosome 10, protein sequence  
MEDKLGLPENKLrDFI QGADKAKWI AKNNHNI KYFTEDEI KRTTSNYSTSLGNGSFGKVY  
NGI I DDNTAVAVKRYsRI DSEEEFAKEVI VHSQVNHKNVRLI GCCTEKNAPI MVFEYVS  
NGTLcENPHGSNPVYLDRKLSI AI QCAEALEI VLHI LPT\*

>OsWAK101 AK111067, Chromosome 10, protein sequence  
MSSVRHSCSNFPI TTKTFMLLSLQI LGSSNSVTPFPSARA

>OsWAK102 3178.t00025, Chromosome 10, protein sequence  
MDLQKNKHNEFI EKPKWI EDNI SNI KAFTKEDI KGI TSNYSKRLGNGKLGKVYKGI LDDN  
HAVVVVKYI HMDSEEEFAKEVI VHSQI NHKNI VRLI GYCTEKNNLMMVMEYMSNGDLdYH  
LHVKNSLDSLDI RLNI AI DCADALGYMHsMCSPVLHGdVKPSNI LLDDSFNAKI SDFGI S  
RLLSTDKTHTENMI TCYMDPLYyQEGRLTSKSDVYSFGI VLMELI TKKRATCLTQALAEG  
QEMTELLDPMI ANESNMKVLEI EKLvQECLAEDI DRRPDI CDVAAYLRMLRKMSQQAPO  
ENFGWHLFAETQNDFFKQSHQGTNI I SSI KMFVPRMMGI LNVNMAKSENKGTPLYVSGKR  
I FTALEI KKI TGNYSRI I GKDMFTVVYSGI LEDNTQVAVKTHNMFERGKWRCANELNSLS

OsWAKs-Supplemental Data 2[1].txt

ELI HKNI I NLLGFCYEMDAVI LVYELI ERGHLNLI LHGNDTKRFLPLDLRLDI AI GLAE  
GLSYMHSRSKPI LHGNI RTVTVLDDKFVPKI SGFGSSKI GEDGKCRI VGSEMGYMDETF  
VNTRVLTRKSDVYSFGVLLLELI TRKRI YYNGKDNNTAI NFAKVYEKEGSGRAMFDNEI S  
ADKNI PTLEDI GI LAMKCFNPDI DKRPEMKEVCEQLLMLKRSSKKGKGI \*

>OsWAK103 3970.t00002, Chromosome 10, protein sequence  
MAFWLLADLLI LLASAAESVAGQPAASCOARCGDI DI PYPFGI GPNCSTRGKGFEI ACNPR  
NDSGEMVPTLAAANGTI HVQSLLVAPI PEVKVMLPVAYQCYYSNNSI TDSFYGEVDLNT  
GVYRI SDSRNMFFVI GCNTLSYTONGNSGGKGPYAGLYTTGCVSYCNDSSSARDSMCAGV  
GCCHI DI SPGLSDNVVSFGPWKRGFQVDFSPCDYSFLVDKNEYEFRSADLKMDLNRTMPV  
WLDWAI RDSVTCPPLEVQEKKPAGYACMSDNSECVNSTNGPGYYCKCKQGYDGNPYVDKD  
QGCKDI NECDVSNKKKPCYGVCCNI PGDYECHCRVGYQWSGEGPKKQECSAKFPLAARL  
ALGI TLGFSFLI VAVLFTLMMHKKRKMNEYFKKNGGSVLQKVDNI KI FTKDELKKI TKNN  
SEVLGQGSFGKVKYKTLEDNTPVAVKTSI EVNEARKDDFTNEVI I QSQMMHNNI I KLLGC  
CLEVDVPMLVYEFAAKGNLQDI LHGDANI PLPLGLRLDI AI ESAEGLRYMHSSTSRTI RH  
GDVKPANI LLTDKFI PKI SDFGTSKLLNVDKDFTMFVVGSMGYI DPVFKHTGHLTQKSDV  
YSFGVLLLELI CRKPTI YGENCSLI I EFQDAYDQENSGRI MFDKEI ANEEDI LI LEEI GR  
LAMECLKEKVEERPDMKEVAERFVMLRRSRKCG\*

>OsWAK104 3970.t00008, Chromosome 10, protein sequence  
MAFWLLADLLI LLASAAESI SGRPAAGCOTRCGDVSI PYPFGI GPNCSHGKGFEI ACDTR  
TRNGSGELVPTLAAANGTI HVQSLFVAPI PEVKVMLPVAYQCYNSSDSVTESFFGAVDLN  
NNGVYRI SDKRNMFFVLGCNTMAYTNNGDSHGKGPYAGLYTTGCVSYCNDSSSAQDGMCA  
GI GCCHVDI SPGLSDNVVTFGEWSRYFQVDFNPCNYAFLVAKDEYNFQSRDLQKDLNRTK  
PVWLDWAI RDGGNSSASSSCPAPREVREKMPPEYACVSDNSECVNSTNGPGYYCKCKSKGYE  
GNPYLVGGCNDI DECARSDEYPCHGDCRNTVGDYHCKCRTGYOPRGGGPKI DECSQKFPL  
PAQI ALGI SLGFSFLI VAVLFTLMMMLQKRKI NEYFKKNGGSI LQKVDNI MI FSKDDLKKI  
TKNNSHVI GQGGFGKVKYKTLEDNTMVAVKTSI EVNEARKEDFTNEVI I QSRMMHNNI I K  
LLGCCLEVDVPMLVYEFANGSLQDI LHGDANRSLLLTLDI RLDI AI ESAEGLRYMHSST  
NCTI RHGDVKPANI LLTDKFVPKI SDFGTSKLLTVDKDFTMFVVGSMGYI DPI FHKTGRL  
TQKSDVYSFGVLLLELI SRKPTI YGENFSLI I EFQKAYDEVHSGRAMFDKEI AVEEDI FI  
LEEI GKAMECLKEKVEERPDMKEVAERLVMLRRARKHGQGSYNLSPRHHEEII SI ETTPT  
SFGADFSTNSSVSLSATCTPERKELYKL\*

>OsWAK105 3970.t00013, Chromosome 10, protein sequence  
MATCWLLASLLLLASAAGDESVTGRPAGCOARCGVDI PYPFGI GPNCSTRGEGFEI ACN  
TRNGNGDLVPTLAAANGSI HVQSLSVEQLPEVKVMLPVAYKCYDAGDNVTRRFYGDVDLN  
NNGVYRI SDSRNMFFVI GCNTLSYTONGNSGGSNTHSGLFYTGCVTYCNDSSRAQDGRG  
AGVGCCCHVDI SPGLTDNVVSFGPWTRGFQVDFSPCDYSFLVDKNEYEFRSADLKMDLNRT  
MPVWLDWAI RDSVTCPPLEVQEKKPAGYACVSDNSECVNSTNGPGYYCKCKQGYEGNPYD  
KDQGCKDI NECDVSNKKKPCYGVCCNI PGDYECHCRVGYQWSGEGPKKQECSSKFPLAA  
RLALGI TLGFSFLI VAVLFTLMMHKKRKMNEYFKKNGGSVLQKVDNVKI FSKDELKKI TK  
NNSEVLGQGGFGKVKYKTLEDNTTAVKTSI EVNEARKDDFTNEVI I QSQMMHNNI I KLL  
GCCLEVDVPMLVYEFAAKGNLQDI LHGDANI PLPLGLRLNI AI ESAEGLRYMHSSTSRTI  
RHGDVKPANI LLTDKFI PKI SYFGTSKLLTVDKDFTMFVVGSMGYI DPVFKHTGHLTQKS  
DVYSFGVLLLELI CRKPTI YGENCSLI I EFQDAYDQENSGRI MFDKEI AKQEDI LI LEEI  
GRLAMECLKEKVEERPDMKEVAERLVMLRRSRKCG\*

>OsWAK106 gi |19881772|gb|AAM01173.1|AC113336\_25, Chromosome 10  
MKRKRRRRRSGKGNVPPSSPTAI LAAVFVSDQTVDLVHPSLGVRKLHAVVADRVSLVPQOI LASLARP  
RRARRVPHNEGTDLTATI AREGFDSYVLAVLRRSHRECRGGRSRPGKKAVAATAGDRARHPEAPPPDGSG  
LPGLDPLAGGDI DECALPGI MSNCSFNSVCVNRPGGFDCPCCKRGMTGDGKRGTCTENFPAAKAAVGLSS  
FI VFI VLI FMVKOHLKLLKFYEONGGPVLKGVRI KI YTKKELKQI TSNYSSDI GEGASGKVYMGTLKGG  
QQVAI KKSKKVDEERKSEFTQEVI LQSEMKHNI I QLFGCCLEVDVPMLVYEFTVKGSLHDVLFKCDENM  
KGNLHDVLPKYNDNKKGKGKGVHDALVECDGNKNVSLHDVLFKCGDKI AI DTLLEI AI GSAEGLTYM  
HTAREPI RHGDLKSGNI LI DNNFVPKI SDFGTSRLVAGHKFRPDKFI PADMNYI DPVYMEDGMLTEKS  
DI YSFGI VLI ELVTRKPAKYDDDRSYVRNFI QAYLDREREKCHKEI TPDVEI NI LEMVSEVAVACLEPV  
QDKRPDI EVERQLHRI RHI AGQRI EEKKEEFQRAFPRTGSI SNGFKASSLSGRVPVTQKRSML

>OsWAK107 gi |22711562|gb|AAM01174.2|AC113336\_26, Chromosome 10  
MI RVLI LLLTGFLAI AEKPAQPTLQGCAPAPDMCGNI TI PHPFGI KPGCYLAGFEVI CDRTFNPPRA  
FLAGDPPLFGDKLPPNVSSKPFVTANFYSGTDAGMPSEMNVYTRGPLELLDI SVNQSKLRVYAAI NS  
DCSTNETHHI LFEQSI KLQPSGPFTLSANDNSLVGVGQNV I AMFADSYAGEEYSTI CLSFLSSVSKARNG

OsWAKs-Supplemental Data 2[1].txt

PCENATGLGCCQQTLP PGVNTTLVRFQHRNNSKWRTPCSYAMLVEKSWYNFSTEDLFEYPAFPNKPYPNG  
VLPDKYPTGVPLVLDFAI RENGSCQENRGP PGKDYACVSGNSSCLDAGKGRGYKCECKEGYNGNPNYPNG  
CQGTPTPEPTGDGS

>OsWAK108 3650.t00001, Chromosome 10, protein sequence  
MLMI LPCRLLLRLV LATLLI LAASTDQHVATLPPI TLP GCI DKCGNI SI PFPFGTKQSSC  
FLPGFEVTCNDTFSP RFLFLGNSNP GDRQNYQEFEERYLLTTEEGMPHTLMTDDFLFMEL  
MSI NLTEGVARAYGPVSSDCSLNDTYHLVKRQMTGLAGPFLI STRNALTAVGWNMEANLA  
RSVRSGFLKTCGVRLGQPEFATNGSCLGGGCCQGEI TQGI GSI AKDWYNFTSPDLYSDN  
FSKKYPKGVPLVI DFAI RDGFCPAAGQAPPANYACVSSNSSCVNVTNGDGYI CNCSKGYD  
GNPYI PNGCHDI DECALRDSHP ELRVLYPCSRNGI CMNRPGGYDCPCKRGMMSGDGKAGTC  
SEKFPLQAKI VVGAI GGLFI VAVLVFLALVHREKRKMREFFEKNGGPI LEKVNNI KI FKK  
EELKPI LKASNI I GKGGFGEVYKGR LADNKLAVAKSI KVNAAQKDQFANEI I I QSRVI H  
KNI VKLI GCCVEVDI PI LVYEFI TNGSLDDI LHGSNGEPLSLDLRLDI AAESAEGLAYMH  
SKTTNTI LHGNVKPANI LLDDNFVPKI SDFGI SRLI AVDKNQHTDKVI GDMSYMDPVYLO  
TGLLTKKSDVYSYGVVLELEI SRKKATYSNNSLVRNFLDAHKEKRKATELFDKDI TLAE  
DLVDLDGLVRI AVECLNLDVDQRP EMTKVTTDDLFI LMKSRACKETKQ\*

>OsWAK109 3650.t00008, Chromosome 10, protein sequence  
MRSKFLPTLLPAI TVLLVMOAI SRMTTVAVDQSPRRRI ALPGCPDKCGDI SI PYPFGTK  
EGCYLDI NFI VLCNLSTTPPATAAGTI I LKNGGYFQDOENPVGVQTNKSWWTVDLI DI D  
VTRGEVRVAVPVSSDCSTNESYHEL SI FTQSLNFSTTFLFSATRNVL LGVQSVRARI DG  
VMSGTNYSAACNSLFDTPAKAENGTCMGLGCCEAELAPELGMI TVSMYKQSNMWWETFP  
TYAMVVERSWYNFSLQDLYGYDVLDDKFP GGVPVLDFAI RNESCPAEGKPLPTACRSSN  
SLCVNTTNGQGYVCKCQEGYEGNPYLPDGCQGNLI LRE\*

>OsWAK110 3650.t00009, Chromosome 10, protein sequence  
MEGNGTFPFFSQFSSDPGSSAAGFNLSSAAGFYGCSSCSMLAMLI QENS RAGCAGTMEG  
EADI DECEL RDEQALRDOYRCYGI CKNTI GGYDCQCKFGTKGDAKTGTCTQLFPLPAMV  
ATLGI I GLTSI VVVVVL FKL LFDERRKTKEFFI KNGGPVLEKVDNI KI FKKEELKPI I QS  
CNVI GKGGFGEVYKGLI DDKLVAI KKS I NVDKLQEKQFTNEI I I QSKVI HKNI I KLI GCC  
LEVDVPM LVYEFVPRGSLHI LHGNRKESLPQKRLNI AAGAAEGLAYMH SKTSTTI LHG  
DI KPGNI LLDENFDPKI SDFGI SRLI AI DKTHTKCVI GDMCYMDPI YLQSGLLTKQSDVY  
SFGVVLLELLTRQKASSGEDTRLVTTFLDAYTEDHKGAI DLF DREI LLEGDTVEVFNNLAI  
LVVDCLKFEVERRPEMTDVEERLQTMKRSYVPKSI SDASSI DT\*

>OsWAK111 9638.t00862, Chromosome 10, protein sequence  
MLPLLSFVLLGI AOVKRSFALSPVLSYGH LI TPYPEGMTRRLEKRFLLDHGTNPSPSNAS  
LPSTSTLARCPKRCGKLSFDYPFGI GQGCFRHVD FSLTCDMATOPPKLFLNNGSTEVLGD  
I GVDGLNI YFI HFNL I PI TSTHVI PI NSGGDVYNFSWKNP GDSFTFARQGMTFVVTSCDL  
DVYMV DQEKSTPI LLGTI ACPSKEI AEMVYRQDSEGP GWTI DSLPARTVQLOFVRHKTG  
NTQKYFNL TMLWDRI NI TVKANLAWNI VDQTRCLNNMEDDRKNHACI SNHSSCVSSQYI D  
VGYACRCNDGYVGNPYI MDGCKLDDGYNPRPQKHNC SRQCGTI VVPFPFGLEEGCAAREV  
FQLSCLGKPNVSLQYNDFI GVQYI NVSEGLVGI KYNSSFVEI LFNMF SQFRFSSQGVSN  
I FGKGP NLVDPTEASVQWAVANLTCQQAQNTSTYACVSTNSSCSRVI STMQGYVGYR  
CTCLPGYDGNPYI PDGCKGI I I GLTI GFGVLI LSSI VI AI I RRWKR DVHKKI RRKYFQKN  
QGLLLEQLI SSDESASEKTKI FSI EELKRATNNFDSTRI LGHGGHGTI YKGI LSNQHVVA  
I KKA KVI KEGEI NDFI NEVAI LSLI NHRNI VKLFGCCLETEVPLL VYDFI PNGSLFELLH  
HDSSTFPLSWGDLRI AAEAAGALCYLHSAASI SI FHRDVKSSNI LLDANYTAKVSDFG  
ASRSVPVDQSHVVTNVQGTFGYLDPEYYOTGQLNEKSDVYSFGVVLLELLLRMOPI FTTM  
SGMKQNLCTYFLSEI KTRPI I DLVDPPVLDKANEEDI RQVASLAEMCI KLGEEPTMRQ  
VEI TLQLLRTEKMTPSHVSPDRNQEI ESLLTQGA I DQVI HALVNVDRANVASQRSQTSY  
SLEKEFLSSASLPR\*

>OsWAK112a AK111815, Chromosome 10, protein sequence  
MLMLLLNI RROVQTLYLRESSI SVARVQMGHLNI MLAFLSFVLLGLAEVEGTVALSQI LS  
NSHLI TPYREVTARKFERRSLLQDHSSDDRSSNASLPSAATLANCPKRCGNLSFDYPFG  
I GDGCFRHPDFSLTCNATTOPPKLLHI NESVEVI DNI EVVGKDI AEFFYFNFFMVAFNH  
LI PI KAGVDVYNLTWKAPGI SFTI SEMMI I TVVSCDL DVFLI GODNTPKLLCMVACPNKE  
I ADMVYMQDCEGPGCCTVLSETPVQAVQLQFVRHETSNAKGI SNLSMLWDRI NI TI GAPL  
VWSI VDQTRCSRNMEDNFACVNHSGCI TSVFRDI GYACQCNSGYKGNPFI LDGCKHDSGY  
NPRPEKHNCARQCGTI TVPFFGLEEGCSARKRFQNLNCDKTN SVLKFN DYFOV TYI NVS  
EGLLGI KHNS SLEEQLFNI MMEMMTSDNEPDLFVDPLESVSVQWAVANLTCQEAQHNTSG

OsWAKs-Supplemental Data 2[1].txt

YACVSTSSSCLNLVSSMDGYVGYRCSCLPGYRGNPYI LDGCEDI DECRETPI CKGVCKN  
TVGNYSCTKCPDHTHEYDI LRMQCTPI RKKSFYLG I I GLSSGFGMLLLGLSGI VLI RRWK  
RHAQKRLQTKYFRKNQGLLLEQLI SSDENASEKTKI FSLEELKKATNNFDTTTRI LGRGGH  
GTVYKGI LSNQHVVAI KKA KVI RECEI NDFI NEVSI LSQI NHRNI VKLFGCCLETEVPLL  
VYDFI PNGSLFGLLHPDSSSTI YLSWGDCLRI AAEAAGALYYLHSAASI SI FHRDVKSSN  
I LLDANYTAKVSDFGASRSVPI DQTHI I TNVQGTFGYLDPEYYQTRQLNEKSDVYSFGVV  
LLELLLRKQPI FTI NSGMKQNLCSYFLSEI KTRPI TDMVDAQVLEEANEEDI KEVASLAE  
MCLKLKGEERPTMKKVEMTLQLLRTKTMNSSQVDP I DQEI QTVL TEGASDPEI QPLVTN  
LDVDRANAASQRFQI SCYSLEQEFLSSASLPR

>OsWAK112b, AK111496,  
MPANAI LASKGNPFI LDGCKHNSGYNPRPEKHNCARQCGTI TVPFPFGLLEEGCSARKRFQ  
LNCSDKTNSVLKFNDYFQVYTI NVSEGLLGI KHNSLEEQLFNI MMEMMTSDNEPDLFVD  
PLESVSVQAVANLTCQEAQHNTSGYACVSTSSSCLNLVSSMDGYVGYRCSCLPGYRGNP  
YI LDGCEDI DECRETPI CKGVCKNTVGNYSCTKCPDHTHEYDI LRMQCTPI RKKSFYLG I  
I I GLSSGFGMLLLGLSGI VLI RRWK RHAQKRLQTKYFRKNQGLLLEQLI SSDENASEKTK  
I FSLEELKKATNNFDTTTRI LGRGGHGTVYKGI LSNQHVVAI KKA KVI RECEI NDFI NEVSI  
I LSQI NHRNI VKLFGCCLETEVPLL VYDFI PNGSLFGLLHPDSSSTI YLSWGDCLRI AAE  
AAGALYYLHSAASI SI FHRDVKSSNI LLDANYTAKVSDFGASRSVPI DQTHI I TNVQGT  
FYLDPEYYQTRQLNEKSDVYSFGVVLLELLLRKQPI FTI NSGMKQNLCSYFLSEI KTRPI  
TDMVDAQVLEEANEEDI KEVASLAEMCLKLKGEERPTMKKVEMTLQLLRTKTMNSSQVDP  
I DQEI QTVL TEGASDPEI QPLVTNLDVDRANAASQRFQI SCYSLE

>OsWAK112c, AK111989,  
MMEEMMTSDNEPDLFVDPLESVSVQAVANLTCQEAQHNTSGYACVSTSSSCLNLVSSMDG  
YVGYRCSCLPGYRGNPYI LDGCEDI DECRETPI CKGVCKNTVGNYSCTKCPDHTHEYDI L  
RMQCTPI RKKSFYLG I I I GLSSGFGMLLLGLSGI VLI RRWK RHAQKRLQTKYFRKNQGLL  
LEQLI SSDENASEKTKI FSLEELKKATNNFDTTTRI LGRGGHGTVYKGI LSNQHVVAI KKA  
KVI RECEI NDFI NEVSI LSQI NHRNI VKLFGCCLETEVPLL VYDFI PNGSLFGLLHPDSS  
STI YLSWGDCLRI AAEAAGALYYLHSAASI SI FHRDVKSSNI LLDANYTAKVSDFGASRS  
VPI DQTHI I TNVQGTFGYLDPEYYQTRQLNEKSDVYSFGVVLLELLLRKQPI FTI NSGMK  
QNLCSYFLSEI KTRPI TDMVDAQVLEEANEEDI KEVASLAEMCLKLKGEERPTMKKVEMT  
LQLLRTKTMNSSQVDP I DQEI QTVL TEGASDPEI QPLVTNLDVDRANAASQRFQI SCYS  
LEQEFLSSASLPR

>OsWAK112d, AK111809,  
MWPI FYLVHKYSFLFKI I YCLTEMCLPVTDI DECRETPI CKGVCKNTVGNYSCTKCPDH  
TEYDI LRMQCTPI RKKSFYLG I I I GLSSGFGMLLLGLSGI VLI RRWK RHAQKRLQTKYFR  
KNQGLLLEQLI SSDENASEKTKI FSLEELKKATNNFDTTTRI LGRGGHGTVYKGI LSNQHV  
VAI KKA KVI RECEI NDFI NEVSI LSQI NHRNI VKLFGCCLETEVPLL VYDFI PNGSLFGL  
LHPDSSSTI YLSWGDCLRI AAEAAGALYYLHSAASI SI FHRDVKSSNI LLDANYTAKVSD  
FGASGSVPI DQTHI I TNVQGTFGYLDPEYYQTRQLNEKSDVYSFGVVLLELLLRKQPI FT  
I NSGMKQNLCSYFLSEI KTRPI TDMVDAQVLEEANEEDI KEVASLAEMCLKLKGEERPTM  
KKVEMTLQLLRTKTMNSSQVDP I DQEI QTVL TEGASDPEI QPLVTNLDVDRANAASQRF  
QI SCYSLEQEFLSSASLPR

>OsWAK113 3170.t00013, Chromosome 10, protein sequence  
MELLLLVLFLLLAAMSAAVESI TSTAVKTGCQERCGVDI PYPFGI GPGCSRHGFE LSCVS  
NGSGAGPI AVLAGTSI QVTRLSVEPAESQVMLPVGWQCYNTSQPTRTYPDWSRAKTEMNR  
GGVYRI SNTHNMLVVLGCNTVGYTESLRSEGGAYSSTYYI GCMSYCNNSASAODGOCAGV  
GCCHVDI PPGLTDSSVNFVYDHTGMVDYSPCDY AFLTDR TNYSFRRADLI KMDKNRNVP  
VWLDWAI RENGSMSCAEAKGPGYACVSVHSECVDSTNGPGYNCKCTAGYEGNAYAPDGC  
TSK\*

>OsWAK114 3170.t00015, Chromosome 10, protein sequence  
MHTENHTI FVGI TLGI SFLI VGLLFI LMMROKRRMNEYFRKNGGSVLQKVENI KI FTKDE  
LKKI TKNNSEVLGQGGFGKVKYKGI LEDNTLVAVKASI EVNDARKEDFTNEVI I QSQMI HT  
NI I KLLGCCLEVDVPM LVYEFAANGNLQDI LHGDNNRRVPLPLDLRMDI AVEAAEGLRYM  
HSSANRTI RHGDVKPANI LLNDKFKPKI SDFGTSKLLTVDKDFTMFVVGSMGYI DPV FHK  
TGRLTQKSDVYSFGVVLLELI TRKPTI YDANCSLLI DFQKAYEQENSGRAMFDKDFTI EE  
EI FI LEEI GRLAMECLKEKVEERPDMEVAEQLVI LRRSRKSRQGN YNI SPOQFEEMSTE  
GTPLSLETAVSVSSSVLSAPSTPANNDFSNA\*

OsWAKs-Supplemental Data 2[1].txt

>OsWAK115 3580.t00004, Chromosome 10, protein sequence  
MDRFAMPCQVSVDLVHRHSPI GVAMLLADRSVMAI QQPRALNYEGSRNHTQREREGATRV  
MEVFLVWRALVWLALI TPAAALAQEEAPGCRRCGNVTVPPFGI GSERCYRGGVRGFR  
LDCDDARRPPRLTVAGYGHEVTSI SLAAAEVTVLLNASRACYGGGDYGRGRRGREEQPMS  
LNGSAFLFSSMKSKFVAI GCPGLAYFVDDGGDYVTGCMSCVCRPSARALPGSCRGDDGCCQ  
SNI PLGLASYRPLRSFGRRQGAFLANATACAYAFMVDAMWWFYAGSNFNRTGDFAVPV  
VLDWAI RPDAGSGSGSGSCAAASRTPLPSYACRSAHSVCI DSSNGPGYI CNCTAGYHGNP  
YVVGDDCTDI NECEHKDEYPCYGVCTNTAGSYACSCPKGSSGNASVEGGCRRDDKFTLALK  
TVTGNITFYTSRNNLSLEKAVTDKPAA\*

>OsWAK116 7185.t00001, Chromosome 11, protein sequence  
MEVPESKLGDFI QGDDRKWI ADSNHNI TKFTEDEI KRI TDNYSTVI GKGGFGQVYKGV  
DDNRVVAVKRYI FEDSMEDLAKEVI AHSQVNHKNVVRVVGYSI EQNNALMVVTEYVSKGS  
LHDI LHQSDTPI SLDTRLAI AI QCAEALGYMHSSMYTPI VHGD I KPSNI LLDNLDKI S  
DFGI SRFLYGGKTRHTKNVKGSI DYMDPI LFRDGTQSSKNDVYSFGAVLLELI TRKRI KE  
EGKVS LI TSFTEHDSEGKRMKDLFDANI ASVSNMKI I NOI GKLATKCLAMDMKKRPMNI  
VAEHLRKLREYRNGGHDNTTLWRSFSVTODLFEKYKQSTRNASYGSTKHPKPKKPKKSF  
FKHNSGNSKLLLEKLGAVRI FTKKEVKKFTMDYSCLLLDGLAEYHRGI LEDNTLVTVKTP  
YDGDESLQKLF SHGNDDLVSHPQEHGQTVGLLLGG\*

>OsWAK117 AK102853, Chromosome 11, protein sequence  
MELLQEKNI HVSQRDDKAKWI I DNYSNI RSFTEHDI EKI TSNYSTLI GKGGFGEVFRGVL  
DDEDDVVAVKRYI RGDLEEFMEEI RI HAQMSHKNI VKLI GCCI GKNRLMMVTEFI SNGN  
LEDALHNSDI FI PLSTR LGI AMGCAKALS YMHSMHLSSSLI CHGDI KPANI LLDANLTA  
KVSDFGI SKSLSGGI TRWTSNVKGS I AYMDPI YYREGRVTSKSDVYSFGAVLLELI ARKS  
MKEGGI SCEAFROACAKGKGLRELLDI EI AEECNMNI LEEI AKLATKCM I VDNI KKRPM  
NDVAEHLRTWI FQVRNGGHEKPAWESTLDKVHDALKKGTSSNFWVI VPMLI I FLFSYMSM  
LLKGASMTFCTLKKI SH

>OsWAK118 7185.t00014, Chromosome 11, protein sequence  
MELPEDTI MTGDHSQWDDNSNI RSFTKHDI ERI TGNYSI PI GKGGFGEVFKGFI DDYDRD  
VVAVKRYI HTDLRKEFMEEVSI HSKI NHKNVVKFI GYSTGENTLMLVTEFI SGNLEDA  
LKSDI SI SLDTRLGI AI GCAEALSYMHSMHLSVDLDSL VYHGDI KPANI LLNDSLTA  
KVSDFGI SKSLSGGI TRWTSNVKGS I AYMDPI YYREGRVTSKSDVYSFGAVLLELI ARKS  
MKEGGI SCEAFROACAKGKGLRELLDI EI AEECNMNI LEEI AKLATKCM I VDNI KKRPM  
NDVAEHLRTWI FQVRNGGHEKPAWESTLDKVHDALKKGTSSNFWVI VPMLI I FLFSYMSM  
LLKGASMTFCTLKKI SH

>OsWAK119 7185.t00017, Chromosome 11, protein sequence  
MRKVHDNNNVRI FTEDEI KRI TKNYRTLI GKGGFGEVFSGLDDDDGQVAVKRYI RGD  
LEEFMEEVRI HAQMSHKNI VKLI GYCI GENTLMMVTEFI LNGSLEDVLCNREI SI PLN  
TRLGI AVGCAEALSYMHLSDSL VYHGDI KPGNI LLDANLTA KVSDFGI SKSLSGGLTRY  
TLHI MGCEYDVPDLYVRDGR LTPKSDVYSFGI VLELI ARKRVKQDGVNLI I SFGQAC  
ANGKG LRELFDAEI VEECNMNVLEE I AKLAI ECLTLDI EERP KI NDVAQRLRTLOTH  
REGQESAA RKSSSSRMLNALRKGYKQSTSI FSSTPTANHRRNAI SEI KSEMAKQHNFR  
SFTKENLFEV MGRYKSP LGDKSGI GRYNKG TLEDNMLVVVKSHLSDEDVFM I FYEASI  
VSQI VHEGI I K LLGYCFDADFPMLVY EYVDRGSLYDI LNSAQDI PLGLRLKI TVKTA  
EALDHLHSSPFCVR HGDVRSTNI LLDKNLMPKI SGFTSSRRLTKGNLSFDNVEKYCDL  
MPKKI I RDDPSYI DPK FLOSDVLT TESDVYFGI I LLELI SRKKLLYQDKKHCPVRL  
I PEFI KAYKTEGSGNAMFD KGI TAKKDI VVLENI GRLALRCLSM EI RPTMKDVAEQL  
GMI RRAWKQHAPOGHGCTGCWH L\*

>OsWAK120 9639.t03169, Chromosome 11, protein sequence  
MPYPFGTI DGCFRGPFRVYCEDDHAVYLQEHKKLVLR FELAQGEVLI QKRI ATSCGVN  
LTGKAVGI PWVVDHGGGLADDYPYLT I STKNQFAVVGCGI TAI I VGQGENQPDYTVG  
CRSF CDDVDSNI VEDNSTQCNGNTGCCQASI PGNLKAFQPSFLKI SGVNYSGVPCVYAF  
VVEQN WFKFKTSYAKSMELYSKYRNKGTGVPLVLDLVVGNETCDEAKRNALSYACKATN  
SSCI DR PSRSGYL CNCSQGYEGNPYLHGGCQDI NECDYPWLYPCKGLSI GI GVGSATG  
FI CI VLI A MFLTRRI KHRRI KLROKFFI LNRGQLLQLVSRADI AERMI I TLDELEK  
ATNNFDKAR ELGGGGHGT VYKGI LSDLHVVAI KI SNI VVPKEI DDFI NEVAI LSQI  
NHKNVVKLI GCCL ETEVPLL VYEFI SNGTLYHHLHGEGPRSLWSNRLRI AAEI ANA  
LSYLHSSVTI PI I HRD I KSSNI LLDNLT SKVSDFGASRYI PI EKTALTTAVQGT  
VGYLDPMYFYTGR LNDKSDVY SFGVMLVELLT\*

>OsWAK121 9639.t04303, Chromosome 11, protein sequence  
MATNKRVELERCMLI GVCLLLLLCLLHTAEALMQHPPADCPETCGNI AI PYPFGI GNNC



OsWAKs-Supplemental Data 2[1].txt

SLLGPAAGDDFTVVCNDSYNPPRPFGRDYEI TGI VLEEGVLNASYTAVPYI CYSSPNTSQQ  
FTMSFDLAGSPFLI STTGKNTAI GCNTLAMI I GKEDMTYFTGCI SYCGGDVQKAAPDGS  
PCSLGCGQTELTPELSFLNVTWGVGDHNDTTNSAWDYSPCSYAFI ADKNWYSFKREDLV  
GNANYFDKKGI PLVLWDWI RSNSSCPHESGKMANPVVYPYACVSSHSYCVNVTNNGHGY  
LCNCSDGYHGNPYLPEGCI DI NECDPSTYKENPCPGGTCHNLEGGYKCKCNFGRRKDRKN  
NNSCQPVLSKSATALI ATI CAI AI SSI VLI FLRMEYERKRLRDHFNKNGGOLLKNI GI KI  
FTKEEVGKI TNNYSI I LGKGGFGEVYKGTNDNQOVAVKRSI AVDEARKKDFANEVTI Q  
SQI NHKNVRLVGCLETNPMLVSAYI PKGSLHDVLHGNGNHVAKYNLTLOVRLEI AI E  
SAEALAYMHSSASQKI LHGDVKSSNI LLDDDFKPKVSDFGI SRLI SI EKNHTNFVVGDI N  
YI DPVYMKGTI LTEKSDVYSFGVVLLELI TRKKARYDGNNSLPI NFVKSMTDSQAREML  
DDD TSPEVMDCLHMI GRI AVQSLKEDVDERPTMKHVLEHLHLARSMI PKSTSGQQSGRI  
LI ASGI NQAI VRFLTSC\*

>OsWAK122 6324.t00019, Chromosome 11, protein sequence  
MAVKKHNAMQLQVVVLWLVGVALFSVMASAPAAVAAAPPAECPSKCGDVIDI PFPFGV  
GDDCAWPGPDDFNVTCHNSFTPPRPYYSNMEMKDI SLPKGEMRVYTSVLQNCFDLSNTSS  
SSESDVGSPWLDLAGTPFLVSPERNEFTATGCDTLGMMYGREDGSYLTGCVTTCASLDAA  
ANDGDHCAGLGCCQI QSI PTNLTLLRI VLSANI TDRKI AAWNPCRIFYFI TDRDQGFYRNF  
SRKDLGRSGNKI FANRDGEMVVPTELDWAI RGTNRSCSVCVSDQSDCANATNGDGYLCKC  
SEGVDGNPYLKGNGGCTDI DECKEDPDCSTGSRCHNTEGYYYCKCRFPRRGDGKVNKGKC  
HLPKYI VPTLATVCSVI SLTVLVCLYKRRKRRMFANNNGGRLLKDMNI VLI TEKDLNKM  
KNRSTKI LGEFSFGKVMETHKNQPVAVKYSKGRKLAQTTHGKDI KCMNKNMFQNAFCW  
SKVPSSPEEDSSSRVSGPELVDELRVOSLI OHENVRLDI AI GSAKALSYMHSLSLMHGDV  
KPANI LLDDNLNPKVSDFGSSELI LKFKHVCVDKNYVDPVCI LTNKYTMESDVYSYGVVL  
LELI TRKRAKYDDERSI RVEFVNQYKDNERRKMYDQDMLSSTDLSLYPYCMECLDRMAAV  
AVRCLKNKVDKRPMTAEVVEELKQLREI STRMS\*

>OsWAK123 6324.t00020, Chromosome 11, protein sequence  
MAVKKHNAMQLQVVVLWLVGVALFSVMASAPAAVAAAPPAECPSKCGDVIDI PFPFGV  
GDDCAWPGPDDFNVTCHNSFSPRPYYGNI EI RDI SVAAGEMRVYTPVYQCYNTSDHVD  
SSTSFLQLNI TDSPFLVAPGRNEFTAI GCDTLAWLQGRDDWSFLTGCI TTCVSLDEAAHD  
GEQCSGLGCCQVPSI PPNLALVELNWGNLTKNYAWRYSPCSYAFVAEKAWYKFSRGDFSR  
AGSKSFMNRAGDRSVTVLDWAI RSDGSCSSTRVAPACVSPNSYCVNTTNGQGYLCKCS  
PGYDGNPYVTGDSGCTNI NECKLRREDPAKYSLEYPCYGGSKCHDTEGDYRCKRLGRRG  
DGKI DNGCQPI I PPPVI GI LVI AGVVLFGVLVCLRKKWKLKGCYDRNGGOMLEKTSVKI  
FTKQELDKI TNNKSNKI GKGAFGVYKGTHTDDQPVAVKYSI EKS SRTRGKDEFVKEI TV  
QLQVSHDNLVCLI GCCLEVEVPMLVFEFVPNGSLESVLHGAERCALPLLKRLDI AI GSAK  
ALTYMHSHSRRCI FHGDI KPANI LLDDNLMPKVSDFGSSESVLTKHRSVCADMGYI DPV  
YMTGNFRLKSDVYSFGI VVLELI TRKKAVYDGKSLPI EFTNCYEDDNARRNMYDQDI LS  
AEALQPHCMECLDRMAGI AVQCLEYNI DKRPTMAEALQELI QLRAKVAGK\*

>OsWAK124 AK066290, Chromosome 12, protein sequence  
MI CPWSVAAAAVALLLLSPGENQMVRVSAQPTKTRCAAGVVDTCGDVGVPYLFGI DGGSC  
SFLPGFNLTCDRTKQPHRLFLGDGSHLOVTEI SLANYTVRVLNGVGTVNFTFAGHNDSTA  
KWAGSVGQDDGPYI VSEHNQLVVTGCNI MASLLGNSGSNVI I GCSSFCSI TDWWGADP  
I VHSGAGGACSGLGCCDVNI TI GRPSYELQLRWLDWDHNYDDLPI AVRI AERGWF DGMS  
TKLLRKNRSRAVPVPVLEWAVASVHKPPTPVDVNSTCPKDPARSECRSSNSFCRNI ANM  
YRSGYVCKCDDGYQGNPYLTGGCQDI DECSLPGKCFGECTNTPGNYSCRCPRGARGNPYT  
KDGC I KFPLGPGQLQRKWI GAGWI CFGVSPNGPFSRLLGMLMRNQGRDGI TLNRNASDA  
GAKRNVYL

>OsWAK125 1894.t00003, Chromosome 12, protein sequence  
MRGLQAAVLFTAVAAAAAPTNTCTTRCGDI SFEYPFGVEPGCYHPGFNLTCSSNDTRLFMG  
DGTVOQLDI SI PNSTLRVNATAMAFDPADDVQRGVI NATTTWRAAAAADDDGGPFVVSRR  
NTI ALMGCNARVDLPGGDRHSDNLVSSCTAVCPPVGGGDDAAHDDGGDGGDGTI AI I D  
AWNGKCSGVGCCQANI MLGYSYTI QI KQLEKNLHSDFOYI AYI TDET LNFTTEEI AGR  
I ATPAALPATLDFVI RSNSCSTPANSTAGGECRSEHSFCEDYKGGGNTLLGYSCVCSSEG  
YRGNPYVAGGCHLNC\*

>OsWAK126 5650.t00002, Chromosome 12, protein sequence  
MQEALVLAMKVI PSI I FLAVAVQDAASSGYSLSLPGCPDKCGNVSI PYPFGVGPSCAATS  
I SSYFNLTCSNTFNPPRPMVGDSEALVEVTDI SLEHGEMRVLSPVYI CFTANTTTFTKFT  
EGYELKHTPFLPSPSRNRFTVI GCNTLGLI GGYKGTVSHYVTGCYSYCESI NSTSDGAPC

OsWAKs-Supplemental Data 2[1].txt

AGMGCCEAAI PTDLTAWGAMFEMNQSKVWSFNPCFYAMVSEVGWYSFQQKDLVGHLGFI D  
DRAQRGAPVVADWAI RNGSCPEEGKGI PGDYACI SANSYCMDANNGPGYLCQCSKGYEGN  
PYLLNGCODVDECALRKQDPKYEDMYPCRKGI CHNTPGGYLCCKLGKRS DGTNYGCRPL  
RTTAEKVVI VQRKRHKKDKDEYFKONGGLKLYDEMRSRKVDI RI L TEKDI KKATDNYSE  
DRV LGI GGHGMVYRGI LDDNKEVAI KSKVI NDEWREEFVNEI I I LSQI NHRNI VRLI GC  
CLDVHVPMLVYEFVSNGTLSEFLHGTDRRSSI PLDI RLKI ATQSAEALAYLHSSTRAI L  
HGDFKSANI LDDQHNAKVADFGASALKSMNESEFI MFVQGTGLGYLDPESEFI SHRLTDKS  
DVYSFGVVLLELMTRKRAI YANSI NEKESLSYSFLLMFDQNI HRNMLDREI MDKETMVVL  
EKLSI LAANCLRPGRDDRPTMKEVLECLQMI RRHPMHGASDHKGDSYAHHNYEGSPSMV  
HLNETI YESI ETSRLVDDLVR\*

>OsWAK127a AK100110, Chromosome 12, protein sequence  
MKGI YCSHLAI SASSTSLAVSMLWYFI GSDGI RI DDPSYEQETLVGLDFETSCMWSLLNI  
CRRSATSF I VGLSSPLGFRQCMASASFCSTTI TFSSI MSKSNI SQCLFWWNI KGKI

>OsWAK127b, AK066039,  
MNQLI VNLKKLI SFTQSLWEDKDSLHI LQSI CTGAI PDGPVMDRNTSVGPPI DKPEV  
PN EVLLPEAVPSGLHKHGV EAWVEFPHRALVHHQDRCEVLQVWDDGGLAAAHPSAGSTV  
GCA VDALAVGVAASHI

>OsWAK128a AK067120, Chromosome 12, protein sequence  
MRKLDPKYEELYPCKRGVCQNTPGSYI CKCKKGKSDGTGYGCQPADSPDYRMVVG  
LSVS AI VVTAMACMLI MOLQRRRHKKKEKI EYFKONGGHRLYDEMI SROVDI RI L  
TEREI KRAT ENYNEDRVLGSGGHGMVYRGT LDDNKEVAI KKSRI NDDCREEFVNEI I I  
LSQI NHRNI V RLLGCCLD VDPMLVYEF AHNGTLSEFLHGTDRSPI PLDLRLKI ATQAA  
EALAYLHSST SRTI LHGDVKSANI LMDDQYNKVA DFGASTLKSMDESEFI LFVQGT  
MGYLDPESEFTSHO LTERSDVYSFGVVLLELLTRKKALYTNDFNKNESVVI SVDVSAEQ  
TPSHARP

>OsWAK128b, AK064574,  
MAHAQLLVFLI PMALFLKLAMPVDGAMAMPGCPDKCGNVAI PYPFGI GENCSATNL  
NSYF NLMCNDFTHPPRPQI REPEAHI EVTGI SLERGEMRVLSPVNI CFTSNTTSTK  
SSGVGYD LSRTPLPSPSRNRTVI GCNTLGLI TGYRGASQYVTGCYSYCEGI NSTSDG  
APCAGMG CCEASI PANLTAFAVTFDLNHSKVTFNPCFYSVVAEVGWYNFKKQDLVGH  
LGF I KERAQ NGVPI VADWAI RNGSCP KKEKEPSSYACVSANSYCTAVI NSPGYLCN  
CSQGYGPNPYLS DGCQSAI TQI YLNFVTY

>OsWAK129a AK119448, Chromosome 12, protein sequence  
MTRAQRGAPVVADWAI RNGSCPEEGKGI PGDYACI SANSYCMDANNGPGYLCQCSK  
GYEG NPYLLNGCODVDECALRKQDPKYEDI YPCRKGVCHNTPGGYLCCKLGKRS DGT  
NYGCRP LRTTAEQVVI GTSVSAI ALMALTCVLAMQI QRKRHKKDKDEYFKONGGLK  
LYDEMRSRKV DTI RI L TEKDI KKATDNYSEDRV LGI GGHGMVYRGT LDDNKEVAI  
KSKVI NDEWREEFV NEI I I LSQI NHRNI VRLI GCCLDVHVPMLVYEFVSNGTL  
SEFLHGTDRSPI PLDI RLKI ATQSAEALAYLHSSTRTI LHGDVKSANI LLDGQHN  
AKVADFGASALKSMNESEFI MFVQ GTLGYLDPESEFI SHCLTDKSDVYSFGVVLLE  
LMTRKRAI FANSI NEKESLSYSFLLMFDQ NI HRNMLDREI MDKETMVVLEKLSI  
LAANCLRPGRDDRPTMKEVAECLQMI RRHPMHAAS DHKGDSSAHHNYEGSSSPSMA  
HFD E TI YKSI EASRLVQDLVR

>OsWAK129b, AK062773,  
MHAFCLCLQTWMSAHYVSRI PSMKI YI LAGKESATTHQEDI YANAS

>OsWAK129c, AK119304,  
MLSVI SSI TLLTVI SSKWMTTDGPPNLPWMSRLVA AVSRSLAALDRRRKKSQTPFLQ  
GY I SSYLGSLRNAHSSTSED RDKKHAFRSQTKLV
